# Supplementary material for: Regulatory modules controlling maize inflorescence architecture
Source: HighWire-hosted journal article supplement (doi:10.1101/gr.166397.113), 2013-12-04
Supplement: Supp_Table3.xlsx [file Supp_Table3.xlsx]

## Sheet: Table_S3
Supplemental Table 3: Transcription factors and chromatin-related genes (MapMan annotation class: RNA.regulation of transcription) differentially expressed (DE) in 1mm ramosa mutants.
aIf the gene is DE (p < 0.05; 10% FDR) in a ra mutant at 1mm, fold-change (natural log) is listed, otherwise left blank.
					DE genes in ra mutants (ln fold-change)a
ABI3/VP1-B3
BinCode	BinName	id	type	description	ra1	ra2	ra3
27.3.1	RNA.regulation of transcription.ABI3/VP1-related B3-domain-containing transcription factor family	grmzm5g805685_t01	Transcript	weakly similar to ( 154) AT2G36080 | Symbols: | DNA-binding protein, putative | chr2:15148612-15151411 REVERSEmoderately similar to ( 238) loc_os11g05740 12011.m04770 protein B3 DNA binding domain containing protein, expressed seq=cds; coord=10:6070107..6071456:1; parent_gene=GRMZM5G805685	-1.01318
27.3.1	RNA.regulation of transcription.ABI3/VP1-related B3-domain-containing transcription factor family	grmzm2g158162_t01	Transcript	highly similar to ( 600) AT2G30470 | Symbols: HSI2, VAL1 | HSI2 (HIGH-LEVEL EXPRESSION OF SUGAR-INDUCIBLE GENE 2); transcription factor/ transcription repressor | chr2:12980904-12984724 REVERSEvery weakly similar to (82.0) VIV_ORYSA Protein viviparous homolog - Oryza sativa (Rice)nearly identical (1497) loc_os07g48200 12007.m079794 protein B3 DNA binding domain containing protein, expressed seq=c…	-0.521519		-0.671836
27.3.1	RNA.regulation of transcription.ABI3/VP1-related B3-domain-containing transcription factor family	grmzm2g018336_t01	Transcript	weakly similar to ( 177) AT1G25560 | Symbols: TEM1 | TEM1 (TEMPRANILLO 1); transcription factor | chr1:8981891-8982976 REVERSEmoderately similar to ( 265) loc_os01g49830 12001.m11168 protein DNA-binding protein RAV1, putative, expressed seq=cds; coord=5:28639860..28641213:-1; parent_gene=GRMZM2G018336			1.01495
27.3.1	RNA.regulation of transcription.ABI3/VP1-related B3-domain-containing transcription factor family	grmzm2g065538_t01	Transcript	weakly similar to ( 177) AT1G25560 | Symbols: TEM1 | TEM1 (TEMPRANILLO 1); transcription factor | chr1:8981891-8982976 REVERSEmoderately similar to ( 265) loc_os01g49830 12001.m11168 protein DNA-binding protein RAV1, putative, expressed seq=cds; coord=8:152462978..152463820:-1; parent_gene=GRMZM2G065538			1.03348
B3
BinCode	BinName	id	type	description	ra1	ra2	ra3
27.3.41	RNA.regulation of transcription.B3 transcription factor family	grmzm2g174610_t01	Transcript	weakly similar to ( 171) AT5G58280 | Symbols: | transcriptional factor B3 family protein | chr5:23567338-23568670 FORWARDmoderately similar to ( 358) loc_os05g40280 12005.m08204 protein DNA binding protein, putative, expressed seq=cds; coord=6:154638206..154643200:1; parent_gene=GRMZM2G174610	-0.508506
27.3.41	RNA.regulation of transcription.B3 transcription factor family	grmzm2g344521_t01	Transcript	moderately similar to ( 345) loc_os03g42230 12003.m09281 protein B3 DNA binding domain containing protein, expressed seq=cds; coord=1:254530577..254534616:-1; parent_gene=GRMZM2G344521		1.13584	0.716437
27.3.41	RNA.regulation of transcription.B3 transcription factor family	grmzm2g088427_t01	Transcript	weakly similar to ( 107) AT4G33280 | Symbols: | DNA binding / transcription factor | chr4:16047357-16049310 REVERSEmoderately similar to ( 295) loc_os03g42370 12003.m09294 protein B3 DNA binding domain containing protein seq=cds; coord=1:254427709..254429811:1; parent_gene=GRMZM2G088427			1.3775
27.3.41	RNA.regulation of transcription.B3 transcription factor family	grmzm2g313737_t01	Transcript	highly similar to ( 562) loc_os01g52540 12001.m11427 protein B3 DNA binding domain containing protein, expressed seq=cds; coord=8:155839328..155847673:-1; parent_gene=GRMZM2G313737			0.832647
27.3.41	RNA.regulation of transcription.B3 transcription factor family	grmzm2g522066_t01	Transcript	weakly similar to ( 161) loc_os12g40120 12012.m07796 protein B3 DNA binding domain containing protein, expressed seq=cds; coord=1:165083495..165084760:1; parent_gene=GRMZM2G522066			2.3212
AP2-EREBP
BinCode	BinName	id	type	description	ra1	ra2	ra3
27.3.3	RNA.regulation of transcription.AP2/EREBP, APETALA2/Ethylene-responsive element binding protein family	grmzm5g889719_t01	Transcript	weakly similar to ( 124) AT2G44940 | Symbols: | AP2 domain-containing transcription factor TINY, putative | chr2:18537294-18538181 FORWARDvery weakly similar to (84.7) ERF3_TOBAC Ethylene-responsive transcription factor 3 (Ethylene-responsive element-binding factor 3 homolog) (EREBP-5) (NtERF5) - Nicotiana tabacum (Common tobacco)weakly similar to ( 173) loc_os10g41130 12010.m06878 protein DREB-l…	-0.92872
27.3.3	RNA.regulation of transcription.AP2/EREBP, APETALA2/Ethylene-responsive element binding protein family	grmzm2g322672_t01	Transcript	weakly similar to ( 111) loc_os06g47590 12006.m09285 protein ethylene-responsive transcription factor 3, putative, expressed seq=cds; coord=5:81761119..81763618:1; parent_gene=GRMZM2G322672	-0.848786
27.3.3	RNA.regulation of transcription.AP2/EREBP, APETALA2/Ethylene-responsive element binding protein family	grmzm2g451031_t01	Transcript	moderately similar to ( 204) AT3G54320 | Symbols: WRI1, WRI, ASML1 | WRI1 (WRINKLED 1); DNA binding / transcription factor | chr3:20114809-20118473 FORWARDweakly similar to ( 185) BBM2_BRANA Protein BABY BOOM 2 (BnBBM2) - Brassica napus (Rape)moderately similar to ( 267) loc_os01g59780 12001.m12112 protein protein BABY BOOM 1, putative, expressed seq=cds; coord=3:186723034..186725961:1; parent_ge…	-1.1566
27.3.3	RNA.regulation of transcription.AP2/EREBP, APETALA2/Ethylene-responsive element binding protein family	grmzm2g169654_t01	Transcript	moderately similar to ( 279) AT1G68840 | Symbols: RAV2, RAP2.8, TEM2 | RAV2 (REGULATOR OF THE ATPASE OF THE VACUOLAR MEMBRANE); DNA binding / transcription factor/ transcription repressor | chr1:25880442-25881500 FORWARDmoderately similar to ( 401) loc_os01g49830 12001.m11168 protein DNA-binding protein RAV1, putative, expressed seq=cds; coord=3:206600510..206602296:1; parent_gene=GRMZM2G169654	-0.954063		0.924896
27.3.3	RNA.regulation of transcription.AP2/EREBP, APETALA2/Ethylene-responsive element binding protein family	grmzm5g806839_t01	Transcript	weakly similar to ( 124) AT2G44940 | Symbols: | AP2 domain-containing transcription factor TINY, putative | chr2:18537294-18538181 FORWARDweakly similar to ( 197) loc_os10g41130 12010.m06878 protein DREB-like protein, putative, expressed seq=cds; coord=1:90107598..90108398:-1; parent_gene=GRMZM5G806839	-1.63689
27.3.3	RNA.regulation of transcription.AP2/EREBP, APETALA2/Ethylene-responsive element binding protein family	grmzm2g085964_t01	Transcript	weakly similar to ( 105) AT3G16770 | Symbols: RAP2.3, ATEBP, ERF72 | ATEBP (ETHYLENE-RESPONSIVE ELEMENT BINDING PROTEIN); DNA binding / protein binding / transcription activator/ transcription factor | chr3:5705784-5706768 FORWARDvery weakly similar to ( 100) ERF1_ORYSA Ethylene-responsive transcription factor 1 (Ethylene-responsive element-binding factor 1) (EREBP-1) (OsEREBP1) - Oryza sativa (R…	-1.16344		0.803716
27.3.3	RNA.regulation of transcription.AP2/EREBP, APETALA2/Ethylene-responsive element binding protein family	grmzm5g816314_t01	Transcript	weakly similar to ( 132) AT2G44940 | Symbols: | AP2 domain-containing transcription factor TINY, putative | chr2:18537294-18538181 FORWARDvery weakly similar to (82.4) ERF1_ORYSA Ethylene-responsive transcription factor 1 (Ethylene-responsive element-binding factor 1) (EREBP-1) (OsEREBP1) - Oryza sativa (Rice)weakly similar to ( 153) loc_os02g43970 12002.m09432 protein dehydration-responsive elem…	-1.22951		0.925758
27.3.3	RNA.regulation of transcription.AP2/EREBP, APETALA2/Ethylene-responsive element binding protein family	grmzm2g042756_t01	Transcript	weakly similar to ( 129) AT5G51990 | Symbols: CBF4, DREB1D | CBF4 (C- REPEAT-BINDING FACTOR 4); DNA binding / transcription activator/ transcription factor | chr5:21117113-21117787 REVERSEmoderately similar to ( 275) loc_os04g48350 12004.m09771 protein dehydration-responsive element-binding protein 1D, putative, expressed seq=cds; coord=2:16532570..16533829:-1; parent_gene=GRMZM2G042756	1.28573	1.01578	2.35412
27.3.3	RNA.regulation of transcription.AP2/EREBP, APETALA2/Ethylene-responsive element binding protein family	grmzm2g165257_t01	Transcript	very weakly similar to (89.0) AT1G24590 | Symbols: DRNL, DRN-LIKE, SOB2, ESR2 | DRNL (DORNROSCHEN-LIKE); DNA binding / transcription factor | chr1:8714389-8715309 REVERSEmoderately similar to ( 208) loc_os02g38090 12002.m08897 protein AP2 domain containing protein seq=cds; coord=4:130072295..130073590:1; parent_gene=GRMZM2G165257	-0.798023
27.3.3	RNA.regulation of transcription.AP2/EREBP, APETALA2/Ethylene-responsive element binding protein family	grmzm2g021573_t01	Transcript	moderately similar to ( 321) AT4G37750 | Symbols: ANT, DRG, CKC, CKC1 | ANT (AINTEGUMENTA); DNA binding / transcription factor | chr4:17739782-17742189 FORWARDmoderately similar to ( 266) BBM2_BRANA Protein BABY BOOM 2 (BnBBM2) - Brassica napus (Rape)highly similar to ( 678) loc_os03g12950 12003.m06742 protein protein AINTEGUMENTA, putative, expressed seq=cds; coord=9:144879259..144883112:-1; par…	-0.482806
27.3.3	RNA.regulation of transcription.AP2/EREBP, APETALA2/Ethylene-responsive element binding protein family	grmzm2g142179_t01	Transcript	weakly similar to ( 114) AT4G23750 | Symbols: CRF2 | CRF2 (CYTOKININ RESPONSE FACTOR 2); DNA binding / transcription factor | chr4:12376751-12377782 FORWARDweakly similar to ( 101) ERF3_TOBAC Ethylene-responsive transcription factor 3 (Ethylene-responsive element-binding factor 3 homolog) (EREBP-5) (NtERF5) - Nicotiana tabacum (Common tobacco)moderately similar to ( 300) loc_os01g12440 12001.m078…	-0.82384		1.07093
27.3.3	RNA.regulation of transcription.AP2/EREBP, APETALA2/Ethylene-responsive element binding protein family	grmzm2g146688_t01	Transcript	moderately similar to ( 207) AT4G37750 | Symbols: ANT, DRG, CKC, CKC1 | ANT (AINTEGUMENTA); DNA binding / transcription factor | chr4:17739782-17742189 FORWARDweakly similar to ( 187) BBM2_BRANA Protein BABY BOOM 2 (BnBBM2) - Brassica napus (Rape)moderately similar to ( 213) loc_os03g56050 12003.m10516 protein ANT-like protein, putative, expressed seq=cds; coord=2:236425425..236428367:1; parent_g…	-0.92456
27.3.3	RNA.regulation of transcription.AP2/EREBP, APETALA2/Ethylene-responsive element binding protein family	grmzm2g156006_t01	Transcript	weakly similar to ( 103) AT5G25190 | Symbols: | ethylene-responsive element-binding protein, putative | chr5:8707007-8707655 REVERSEweakly similar to ( 120) loc_os02g55380 12002.m10564 protein ethylene response factor 1, putative, expressed seq=cds; coord=9:13755742..13756504:-1; parent_gene=GRMZM2G156006	-0.975911
27.3.3	RNA.regulation of transcription.AP2/EREBP, APETALA2/Ethylene-responsive element binding protein family	grmzm2g060249_t01	Transcript	very weakly similar to (82.0) loc_os04g32790 12004.m08376 protein AP2 domain containing protein, expressed seq=cds; coord=7:165783320..165783787:-1; parent_gene=GRMZM2G060249	-1.0594		-1.01188
27.3.3	RNA.regulation of transcription.AP2/EREBP, APETALA2/Ethylene-responsive element binding protein family	grmzm2g172936_t01	Transcript	weakly similar to ( 127) AT2G44940 | Symbols: | AP2 domain-containing transcription factor TINY, putative | chr2:18537294-18538181 FORWARDweakly similar to ( 147) loc_os04g46440 12004.m09593 protein dehydration-responsive element-binding protein 1C, putative, expressed seq=cds; coord=2:20008480..20009337:-1; parent_gene=GRMZM2G172936	-0.66398		1.00665
27.3.3	RNA.regulation of transcription.AP2/EREBP, APETALA2/Ethylene-responsive element binding protein family	grmzm2g176175_t01	Transcript	moderately similar to ( 261) AT4G36920 | Symbols: AP2, FLO2, FL1 | AP2 (APETALA 2); transcription factor | chr4:17400998-17403140 FORWARDweakly similar to ( 147) BBM2_BRANA Protein BABY BOOM 2 (BnBBM2) - Brassica napus (Rape)moderately similar to ( 499) loc_os07g13170 12007.m29109 protein floral homeotic protein, putative, expressed seq=cds; coord=7:22004372..22015553:1; parent_gene=GRMZM2G176175	-0.890449
27.3.3	RNA.regulation of transcription.AP2/EREBP, APETALA2/Ethylene-responsive element binding protein family	grmzm2g174917_t01	Transcript	weakly similar to ( 101) AT5G67190 | Symbols: | AP2 domain-containing transcription factor, putative | chr5:26809135-26809689 REVERSEweakly similar to ( 168) loc_os04g55520 12004.m10443 protein dehydration responsive element binding protein, putative, expressed seq=cds; coord=2:5562976..5564647:1; parent_gene=GRMZM2G174917	-1.40266
27.3.3	RNA.regulation of transcription.AP2/EREBP, APETALA2/Ethylene-responsive element binding protein family	grmzm2g124037_t01	Transcript	very weakly similar to (80.5) AT5G51990 | Symbols: CBF4, DREB1D | CBF4 (C- REPEAT-BINDING FACTOR 4); DNA binding / transcription activator/ transcription factor | chr5:21117113-21117787 REVERSEweakly similar to ( 145) loc_os09g35020 12009.m06502 protein dehydration-responsive element-binding protein 1D, putative, expressed seq=cds; coord=2:194479918..194481002:-1; parent_gene=GRMZM2G124037	1.26241	1.66668	3.93618
27.3.3	RNA.regulation of transcription.AP2/EREBP, APETALA2/Ethylene-responsive element binding protein family	grmzm2g137341_t01	Transcript	weakly similar to ( 120) AT5G51990 | Symbols: CBF4, DREB1D | CBF4 (C- REPEAT-BINDING FACTOR 4); DNA binding / transcription activator/ transcription factor | chr5:21117113-21117787 REVERSEmoderately similar to ( 233) loc_os02g45450 12002.m09582 protein dehydration-responsive element-binding protein 1A, putative, expressed seq=cds; coord=5:195834102..195835230:1; parent_gene=GRMZM2G137341	1.52816	1.59495	2.75721
27.3.3	RNA.regulation of transcription.AP2/EREBP, APETALA2/Ethylene-responsive element binding protein family	grmzm2g059939_t01	Transcript	weakly similar to ( 174) AT1G13260 | Symbols: RAV1 | RAV1; DNA binding / transcription factor/ transcription repressor | chr1:4542386-4543420 FORWARDmoderately similar to ( 261) loc_os05g47650 12005.m08837 protein DNA-binding protein RAV1, putative, expressed seq=cds; coord=6:162571228..162572866:1; parent_gene=GRMZM2G059939	-0.818048
27.3.3	RNA.regulation of transcription.AP2/EREBP, APETALA2/Ethylene-responsive element binding protein family	grmzm2g029323_t01	Transcript	weakly similar to ( 129) AT1G22190 | Symbols: | AP2 domain-containing transcription factor, putative | chr1:7836245-7837030 FORWARDmoderately similar to ( 273) loc_os02g51670 12002.m10198 protein AP2 domain-containing protein, putative, expressed seq=cds; coord=4:181057725..181059564:-1; parent_gene=GRMZM2G029323	-0.716547
27.3.3	RNA.regulation of transcription.AP2/EREBP, APETALA2/Ethylene-responsive element binding protein family	grmzm2g119865_t01	Transcript	weakly similar to ( 104) AT2G23340 | Symbols: | AP2 domain-containing transcription factor, putative | chr2:9938186-9938716 FORWARDweakly similar to ( 151) loc_os06g07030 12006.m05428 protein dehydration responsive element binding protein, putative, expressed seq=cds; coord=6:79553937..79555390:1; parent_gene=GRMZM2G119865	-1.28379
27.3.3	RNA.regulation of transcription.AP2/EREBP, APETALA2/Ethylene-responsive element binding protein family	grmzm2g171569_t01	Transcript	seq=cds; coord=7:21149818..21151267:-1; parent_gene=GRMZM2G171569	-0.884444
27.3.3	RNA.regulation of transcription.AP2/EREBP, APETALA2/Ethylene-responsive element binding protein family	grmzm2g421033_t01	Transcript	weakly similar to ( 107) AT2G23340 | Symbols: | AP2 domain-containing transcription factor, putative | chr2:9938186-9938716 FORWARDweakly similar to ( 187) loc_os04g55520 12004.m10443 protein dehydration responsive element binding protein, putative, expressed seq=cds; coord=10:145279859..145281275:-1; parent_gene=GRMZM2G421033	-1.4138
27.3.3	RNA.regulation of transcription.AP2/EREBP, APETALA2/Ethylene-responsive element binding protein family	grmzm2g301860_t01	Transcript	weakly similar to ( 112) AT2G23340 | Symbols: | AP2 domain-containing transcription factor, putative | chr2:9938186-9938716 FORWARDweakly similar to ( 157) loc_os06g07030 12006.m05428 protein dehydration responsive element binding protein, putative, expressed seq=cds; coord=9:16252231..16253405:-1; parent_gene=GRMZM2G301860	-1.72077
27.3.3	RNA.regulation of transcription.AP2/EREBP, APETALA2/Ethylene-responsive element binding protein family	grmzm2g132223_t01	Transcript	weakly similar to ( 112) AT1G28360 | Symbols: ERF12, ATERF12 | ERF12 (ERF DOMAIN PROTEIN 12); DNA binding / transcription factor/ transcription repressor | chr1:9951934-9952503 FORWARDweakly similar to ( 102) ERF3_TOBAC Ethylene-responsive transcription factor 3 (Ethylene-responsive element-binding factor 3 homolog) (EREBP-5) (NtERF5) - Nicotiana tabacum (Common tobacco)weakly similar to ( 129) l…	-0.831161
27.3.3	RNA.regulation of transcription.AP2/EREBP, APETALA2/Ethylene-responsive element binding protein family	grmzm2g061700_t01	Transcript	weakly similar to ( 144) AT3G20300 | Symbols: | unknown protein | chr3:7079832-7081809 REVERSEmoderately similar to ( 239) loc_os02g35830 12002.m08671 protein expressed protein seq=cds; coord=5:175237401..175238445:1; parent_gene=GRMZM2G061700	-1.20545
27.3.3	RNA.regulation of transcription.AP2/EREBP, APETALA2/Ethylene-responsive element binding protein family	grmzm2g076896_t01	Transcript	very weakly similar to (80.9) loc_os11g06770 12011.m04874 protein DNA binding protein, putative, expressed seq=cds; coord=4:215103565..215106202:1; parent_gene=GRMZM2G076896	-1.37895
27.3.3	RNA.regulation of transcription.AP2/EREBP, APETALA2/Ethylene-responsive element binding protein family	grmzm2g066158_t01	Transcript	weakly similar to ( 109) AT1G28360 | Symbols: ERF12, ATERF12 | ERF12 (ERF DOMAIN PROTEIN 12); DNA binding / transcription factor/ transcription repressor | chr1:9951934-9952503 FORWARDvery weakly similar to ( 100) ERF4_TOBAC Ethylene-responsive transcription factor 4 (Ethylene-responsive element-binding factor 4 homolog) (EREBP-3) (NtERF3) - Nicotiana tabacum (Common tobacco)weakly similar to ( 1…	-1.17677
27.3.3	RNA.regulation of transcription.AP2/EREBP, APETALA2/Ethylene-responsive element binding protein family	grmzm2g175543_t01	Transcript	very weakly similar to (84.0) loc_os06g47590 12006.m09285 protein ethylene-responsive transcription factor 3, putative, expressed seq=cds; coord=6:88747513..88749211:-1; parent_gene=GRMZM2G175543	-1.16278
27.3.3	RNA.regulation of transcription.AP2/EREBP, APETALA2/Ethylene-responsive element binding protein family	grmzm2g007406_t01	Transcript	very weakly similar to (83.6) AT1G21910 | Symbols: | AP2 domain-containing transcription factor family protein | chr1:7696655-7697347 FORWARDvery weakly similar to (94.7) loc_os03g15660 12003.m07003 protein AP2 domain containing protein, expressed seq=cds; coord=9:140949345..140950289:1; parent_gene=GRMZM2G007406	-1.16986
27.3.3	RNA.regulation of transcription.AP2/EREBP, APETALA2/Ethylene-responsive element binding protein family	grmzm2g069082_t01	Transcript	weakly similar to ( 143) loc_os09g35020 12009.m06502 protein dehydration-responsive element-binding protein 1D, putative, expressed seq=cds; coord=7:141126154..141127124:-1; parent_gene=GRMZM2G069082	1.20473	1.55623	2.877
27.3.3	RNA.regulation of transcription.AP2/EREBP, APETALA2/Ethylene-responsive element binding protein family	grmzm2g052720_t01	Transcript	very weakly similar to (90.9) loc_os02g06330 12002.m05981 protein ethylene-responsive transcription factor 3, putative, expressed seq=cds; coord=4:237141158..237142571:1; parent_gene=GRMZM2G052720	-1.00819		0.81638
27.3.3	RNA.regulation of transcription.AP2/EREBP, APETALA2/Ethylene-responsive element binding protein family	grmzm2g028151_t01	Transcript	moderately similar to ( 373) AT4G37750 | Symbols: ANT, DRG, CKC, CKC1 | ANT (AINTEGUMENTA); DNA binding / transcription factor | chr4:17739782-17742189 FORWARDmoderately similar to ( 342) BBM2_BRANA Protein BABY BOOM 2 (BnBBM2) - Brassica napus (Rape)highly similar to ( 513) loc_os03g56050 12003.m10516 protein ANT-like protein, putative, expressed seq=cds; coord=1:281632191..281635979:1; parent_g…	-0.726647
27.3.3	RNA.regulation of transcription.AP2/EREBP, APETALA2/Ethylene-responsive element binding protein family	grmzm5g862109_t01	Transcript	moderately similar to ( 290) AT4G36920 | Symbols: AP2, FLO2, FL1 | AP2 (APETALA 2); transcription factor | chr4:17400998-17403140 FORWARDweakly similar to ( 159) BBM2_BRANA Protein BABY BOOM 2 (BnBBM2) - Brassica napus (Rape)moderately similar to ( 479) loc_os03g60430 12003.m10932 protein floral homeotic protein, putative, expressed seq=cds; coord=1:292889740..292893983:1; parent_gene=GRMZM5G8621…	-0.585643		0.497054
27.3.3	RNA.regulation of transcription.AP2/EREBP, APETALA2/Ethylene-responsive element binding protein family	grmzm2g120401_t01	Transcript	very weakly similar to (89.0) AT1G24590 | Symbols: DRNL, DRN-LIKE, SOB2, ESR2 | DRNL (DORNROSCHEN-LIKE); DNA binding / transcription factor | chr1:8714389-8715309 REVERSEmoderately similar to ( 208) loc_os02g38090 12002.m08897 protein AP2 domain containing protein seq=cds; coord=8:80979479..80980774:1; parent_gene=GRMZM2G120401	-0.79508
27.3.3	RNA.regulation of transcription.AP2/EREBP, APETALA2/Ethylene-responsive element binding protein family	grmzm2g003466_t01	Transcript	weakly similar to ( 139) AT5G65130 | Symbols: | AP2 domain-containing transcription factor, putative | chr5:26017403-26018236 FORWARDmoderately similar to ( 256) loc_os03g09170 12003.m06423 protein DRE binding factor, putative, expressed seq=cds; coord=1:20094963..20096296:-1; parent_gene=GRMZM2G003466		1.03121	1.11947
27.3.3	RNA.regulation of transcription.AP2/EREBP, APETALA2/Ethylene-responsive element binding protein family	grmzm2g025062_t01	Transcript	very weakly similar to (89.7) AT3G16770 | Symbols: RAP2.3, ATEBP, ERF72 | ATEBP (ETHYLENE-RESPONSIVE ELEMENT BINDING PROTEIN); DNA binding / protein binding / transcription activator/ transcription factor | chr3:5705784-5706768 FORWARDweakly similar to ( 151) loc_os07g47790 12007.m29326 protein ERF-like protein, putative, expressed seq=cds; coord=7:172729995..172731206:-1; parent_gene=GRMZM2G0250…		1.39935	2.7755
27.3.3	RNA.regulation of transcription.AP2/EREBP, APETALA2/Ethylene-responsive element binding protein family	grmzm2g018398_t01	Transcript	weakly similar to ( 117) AT1G53910 | Symbols: RAP2.12 | RAP2.12; DNA binding / transcription factor | chr1:20135242-20136581 FORWARDmoderately similar to ( 354) ERF1_ORYSA Ethylene-responsive transcription factor 1 (Ethylene-responsive element-binding factor 1) (EREBP-1) (OsEREBP1) - Oryza sativa (Rice)moderately similar to ( 354) loc_os02g54160 12002.m10445 protein ethylene response element bind…		1.29969	1.38128
27.3.3	RNA.regulation of transcription.AP2/EREBP, APETALA2/Ethylene-responsive element binding protein family	grmzm2g013657_t01	Transcript	moderately similar to ( 294) AT2G41710 | Symbols: | ovule development protein, putative | chr2:17400274-17402903 REVERSEweakly similar to ( 140) BBM2_BRANA Protein BABY BOOM 2 (BnBBM2) - Brassica napus (Rape)highly similar to ( 515) loc_os05g32270 12005.m083578 protein AP2 domain transcription factor, putative, expressed seq=cds; coord=6:143296685..143303409:1; parent_gene=GRMZM2G013657		0.650192	0.632874
27.3.3	RNA.regulation of transcription.AP2/EREBP, APETALA2/Ethylene-responsive element binding protein family	grmzm2g069146_t01	Transcript	very weakly similar to (87.0) AT4G25480 | Symbols: DREB1A, CBF3, ATCBF3 | DREB1A (DEHYDRATION RESPONSE ELEMENT B1A); DNA binding / transcription activator/ transcription factor | chr4:13018353-13019003 REVERSEmoderately similar to ( 234) loc_os09g35030 12009.m06503 protein sbCBF6, putative, expressed seq=cds; coord=7:141137798..141138622:-1; parent_gene=GRMZM2G069146		1.19848	2.41442
27.3.3	RNA.regulation of transcription.AP2/EREBP, APETALA2/Ethylene-responsive element binding protein family	grmzm2g110333_t01	Transcript	weakly similar to ( 138) AT3G14230 | Symbols: RAP2.2 | RAP2.2; DNA binding / transcription factor | chr3:4737616-4739000 REVERSEmoderately similar to ( 373) ERF1_ORYSA Ethylene-responsive transcription factor 1 (Ethylene-responsive element-binding factor 1) (EREBP-1) (OsEREBP1) - Oryza sativa (Rice)moderately similar to ( 373) loc_os02g54160 12002.m10445 protein ethylene response element binding …		1.06665	1.20348
27.3.3	RNA.regulation of transcription.AP2/EREBP, APETALA2/Ethylene-responsive element binding protein family	grmzm2g124011_t01	Transcript	weakly similar to ( 171) loc_os09g35030 12009.m06503 protein sbCBF6, putative, expressed seq=cds; coord=2:194485273..194486255:-1; parent_gene=GRMZM2G124011			2.59578
27.3.3	RNA.regulation of transcription.AP2/EREBP, APETALA2/Ethylene-responsive element binding protein family	grmzm2g466044_t01	Transcript	weakly similar to ( 129) AT4G17500 | Symbols: ATERF-1 | ATERF-1 (ETHYLENE RESPONSIVE ELEMENT BINDING FACTOR 1); DNA binding / transcription activator/ transcription factor | chr4:9759405-9760211 FORWARDweakly similar to ( 131) ERF2_NICSY Ethylene-responsive transcription factor 2 (Ethylene-responsive element-binding factor 2) (EREBP-2) (NsERF2) - Nicotiana sylvestris (Wood tobacco)moderately simi…			1.60945
27.3.3	RNA.regulation of transcription.AP2/EREBP, APETALA2/Ethylene-responsive element binding protein family	grmzm2g011110_t01	Transcript	very weakly similar to (98.6) AT1G21910 | Symbols: | AP2 domain-containing transcription factor family protein | chr1:7696655-7697347 FORWARDweakly similar to ( 167) loc_os06g10780 12006.m05795 protein DNA binding protein, putative, expressed seq=cds; coord=4:178386285..178387653:1; parent_gene=GRMZM2G011110			1.21695
27.3.3	RNA.regulation of transcription.AP2/EREBP, APETALA2/Ethylene-responsive element binding protein family	grmzm2g169382_t01	Transcript	very weakly similar to (82.0) AT2G47520 | Symbols: | AP2 domain-containing transcription factor, putative | chr2:19502891-19503490 REVERSEweakly similar to ( 164) loc_os01g21120 12001.m08596 protein ethylene-responsive factor-like protein 1, putative, expressed seq=cds; coord=3:56324330..56325604:1; parent_gene=GRMZM2G169382			1.4929
27.3.3	RNA.regulation of transcription.AP2/EREBP, APETALA2/Ethylene-responsive element binding protein family	grmzm2g300924_t01	Transcript	weakly similar to ( 150) AT2G20880 | Symbols: | AP2 domain-containing transcription factor, putative | chr2:8986053-8987063 FORWARDvery weakly similar to (85.1) ERF5_TOBAC Ethylene-responsive transcription factor 5 (Ethylene-responsive element-binding factor 5 homolog) (EREBP-4) (NtERF4) - Nicotiana tabacum (Common tobacco)moderately similar to ( 275) loc_os04g44670 12004.m09426 protein AP2 domai…			3.83761
27.3.3	RNA.regulation of transcription.AP2/EREBP, APETALA2/Ethylene-responsive element binding protein family	grmzm2g006745_t01	Transcript	weakly similar to ( 114) AT5G05410 | Symbols: DREB2A, DREB2 | DREB2A; DNA binding / transcription activator/ transcription factor | chr5:1602650-1603657 FORWARDweakly similar to ( 195) loc_os05g27930 12005.m28049 protein dehydration-responsive element-binding protein 2C, putative, expressed seq=cds; coord=8:95020014..95023360:1; parent_gene=GRMZM2G006745			0.52915
27.3.3	RNA.regulation of transcription.AP2/EREBP, APETALA2/Ethylene-responsive element binding protein family	grmzm2g380377_t01	Transcript	weakly similar to ( 115) AT4G25480 | Symbols: DREB1A, CBF3, ATCBF3 | DREB1A (DEHYDRATION RESPONSE ELEMENT B1A); DNA binding / transcription activator/ transcription factor | chr4:13018353-13019003 REVERSEweakly similar to ( 192) loc_os06g03670 12006.m05099 protein dehydration-responsive element-binding protein 1A, putative, expressed seq=cds; coord=6:62553730..62555335:1; parent_gene=GRMZM2G380377			2.40402
27.3.3	RNA.regulation of transcription.AP2/EREBP, APETALA2/Ethylene-responsive element binding protein family	grmzm2g022359_t01	Transcript	weakly similar to ( 194) AT1G72570 | Symbols: | DNA binding / transcription factor | chr1:27331381-27333698 FORWARDweakly similar to ( 190) BBM2_BRANA Protein BABY BOOM 2 (BnBBM2) - Brassica napus (Rape)moderately similar to ( 361) loc_os08g07440 12008.m04882 protein protein BABY BOOM 2, putative, expressed seq=cds; coord=10:73127981..73131426:1; parent_gene=GRMZM2G022359			0.783686
27.3.3	RNA.regulation of transcription.AP2/EREBP, APETALA2/Ethylene-responsive element binding protein family	grmzm2g021369_t01	Transcript	very weakly similar to (98.6) AT1G44830 | Symbols: | AP2 domain-containing transcription factor TINY, putative | chr1:16933792-16934427 FORWARDweakly similar to ( 183) loc_os06g10780 12006.m05795 protein DNA binding protein, putative, expressed seq=cds; coord=5:210273738..210275023:-1; parent_gene=GRMZM2G021369			1.0569
27.3.3	RNA.regulation of transcription.AP2/EREBP, APETALA2/Ethylene-responsive element binding protein family	grmzm2g055180_t01	Transcript	weakly similar to ( 120) AT4G17500 | Symbols: ATERF-1 | ATERF-1 (ETHYLENE RESPONSIVE ELEMENT BINDING FACTOR 1); DNA binding / transcription activator/ transcription factor | chr4:9759405-9760211 FORWARDweakly similar to ( 124) ERF2_TOBAC Ethylene-responsive transcription factor 2 (Ethylene-responsive element-binding factor 2) (EREBP-2) (NtERF2) - Nicotiana tabacum (Common tobacco)moderately simil…			2.62765
27.3.3	RNA.regulation of transcription.AP2/EREBP, APETALA2/Ethylene-responsive element binding protein family	grmzm2g139765_t01	Transcript	weakly similar to ( 152) AT2G20880 | Symbols: | AP2 domain-containing transcription factor, putative | chr2:8986053-8987063 FORWARDvery weakly similar to (87.4) ERF1_ORYSA Ethylene-responsive transcription factor 1 (Ethylene-responsive element-binding factor 1) (EREBP-1) (OsEREBP1) - Oryza sativa (Rice)moderately similar to ( 266) loc_os04g44670 12004.m09426 protein AP2 domain containing protein,…			1.52895
27.3.3	RNA.regulation of transcription.AP2/EREBP, APETALA2/Ethylene-responsive element binding protein family	grmzm2g164591_t01	Transcript	very weakly similar to (82.4) AT3G20310 | Symbols: ATERF-7, ATERF7, ERF7 | ERF7 (ETHYLINE RESPONSE FACTOR 7); DNA binding / protein binding / transcription factor/ transcription repressor | chr3:7085957-7086691 REVERSEvery weakly similar to (94.7) loc_os04g57340 12004.m10619 protein ethylene-responsive transcription factor 3, putative, expressed seq=cds; coord=10:147353754..147354869:-1; parent_g…			1.58684
27.3.3	RNA.regulation of transcription.AP2/EREBP, APETALA2/Ethylene-responsive element binding protein family	grmzm2g020054_t01	Transcript	seq=cds; coord=10:65424541..65425836:1; parent_gene=GRMZM2G020054			1.68063
27.3.3	RNA.regulation of transcription.AP2/EREBP, APETALA2/Ethylene-responsive element binding protein family	grmzm2g061487_t01	Transcript	weakly similar to ( 110) AT4G39780 | Symbols: | AP2 domain-containing transcription factor, putative | chr4:18458216-18459034 REVERSEmoderately similar to ( 202) loc_os08g31580 12008.m07152 protein DRE binding factor 1, putative, expressed seq=cds; coord=1:217586061..217587629:1; parent_gene=GRMZM2G061487			1.44081
27.3.3	RNA.regulation of transcription.AP2/EREBP, APETALA2/Ethylene-responsive element binding protein family	grmzm2g174347_t01	Transcript	weakly similar to ( 151) loc_os05g41780 12005.m08352 protein ethylene-responsive transcription factor 4, putative, expressed seq=cds; coord=8:120960110..120961302:-1; parent_gene=GRMZM2G174347			1.21953
27.3.3	RNA.regulation of transcription.AP2/EREBP, APETALA2/Ethylene-responsive element binding protein family	grmzm2g135452_t01	Transcript	weakly similar to ( 119) AT5G25190 | Symbols: | ethylene-responsive element-binding protein, putative | chr5:8707007-8707655 REVERSEweakly similar to ( 169) loc_os06g08340 12006.m05555 protein ethylene response factor 1, putative, expressed seq=cds; coord=6:51647717..51648706:-1; parent_gene=GRMZM2G135452			1.07767
27.3.3	RNA.regulation of transcription.AP2/EREBP, APETALA2/Ethylene-responsive element binding protein family	grmzm2g368838_t01	Transcript	very weakly similar to (81.3) AT5G52020 | Symbols: | AP2 domain-containing protein | chr5:21124192-21124890 REVERSEvery weakly similar to (89.0) loc_os02g45420 12002.m09579 protein ap2/EREBP transcription factor, putative, expressed seq=cds; coord=2:16539933..16541349:-1; parent_gene=GRMZM2G368838			2.07284
27.3.3	RNA.regulation of transcription.AP2/EREBP, APETALA2/Ethylene-responsive element binding protein family	grmzm2g369472_t01	Transcript	very weakly similar to (93.6) AT4G34410 | Symbols: RRTF1 | RRTF1 ({REDOX RESPONSIVE TRANSCRIPTION FACTOR 1); DNA binding / transcription factor | chr4:16451992-16452798 FORWARDmoderately similar to ( 204) loc_os08g36920 12008.m07680 protein AP2 domain containing protein, expressed seq=cds; coord=1:199639973..199641110:1; parent_gene=GRMZM2G369472			2.71449
27.3.3	RNA.regulation of transcription.AP2/EREBP, APETALA2/Ethylene-responsive element binding protein family	grmzm2g084264_t01	Transcript	very weakly similar to (87.0) AT1G21910 | Symbols: | AP2 domain-containing transcription factor family protein | chr1:7696655-7697347 FORWARDweakly similar to ( 165) loc_os06g10780 12006.m05795 protein DNA binding protein, putative, expressed seq=cds; coord=6:109899548..109900749:1; parent_gene=GRMZM2G084264			1.53426
ARF
BinCode	BinName	id	type	description	ra1	ra2	ra3
27.3.4	RNA.regulation of transcription.ARF, Auxin Response Factor family	grmzm5g874163_t01	Transcript	moderately similar to ( 380) AT2G33860 | Symbols: ETT, ARF3 | ETT (ETTIN); DNA binding / transcription factor | chr2:14325444-14328613 REVERSEmoderately similar to ( 499) loc_os01g54990 12001.m11659 protein auxin response factor 4, putative, expressed seq=cds; coord=8:174214893..174221202:1; parent_gene=GRMZM5G874163	-0.617025
27.3.4	RNA.regulation of transcription.ARF, Auxin Response Factor family	grmzm2g352159_t01	Transcript	moderately similar to ( 433) AT5G62000 | Symbols: ARF2, ARF1-BP, HSS | ARF2 (AUXIN RESPONSE FACTOR 2); protein binding / transcription factor | chr5:24910859-24914680 FORWARDhighly similar to ( 803) loc_os12g29520 12012.m073714 protein auxin response factor 2, putative, expressed seq=cds; coord=3:107571179..107577553:-1; parent_gene=GRMZM2G352159	0.394302	0.552003
27.3.4	RNA.regulation of transcription.ARF, Auxin Response Factor family	grmzm2g081406_t01	Transcript	highly similar to ( 512) AT4G30080 | Symbols: ARF16 | ARF16 (AUXIN RESPONSE FACTOR 16); miRNA binding / transcription factor | chr4:14703369-14705564 REVERSEhighly similar to ( 836) loc_os02g41800 12002.m100286 protein auxin response factor 16, putative, expressed seq=cds; coord=4:143802561..143805351:1; parent_gene=GRMZM2G081406	-0.810686
27.3.4	RNA.regulation of transcription.ARF, Auxin Response Factor family	grmzm2g102845_t01	Transcript	highly similar to ( 601) AT1G19220 | Symbols: ARF19, IAA22, ARF11 | ARF19 (AUXIN RESPONSE FACTOR 19); DNA binding / transcription factor | chr1:6628395-6632779 REVERSEhighly similar to ( 770) loc_os06g48950 12006.m09421 protein auxin response factor 19, putative, expressed seq=cds; coord=5:78381834..78389884:-1; parent_gene=GRMZM2G102845		0.954055
27.3.4	RNA.regulation of transcription.ARF, Auxin Response Factor family	grmzm2g137413_t01	Transcript	highly similar to ( 578) AT1G59750 | Symbols: ARF1 | ARF1 (AUXIN RESPONSE FACTOR 1); DNA binding / transcription factor | chr1:21980414-21984193 FORWARDhighly similar to ( 780) loc_os02g35140 12002.m08602 protein auxin response factor 1, putative, expressed seq=cds; coord=4:118695002..118700985:1; parent_gene=GRMZM2G137413		1.00207
27.3.4	RNA.regulation of transcription.ARF, Auxin Response Factor family	grmzm2g317900_t01	Transcript	highly similar to ( 554) AT1G30330 | Symbols: ARF6 | ARF6 (AUXIN RESPONSE FACTOR 6); transcription factor | chr1:10686125-10690036 REVERSEhighly similar to ( 806) loc_os06g48950 12006.m09421 protein auxin response factor 19, putative, expressed seq=cds; coord=5:57427815..57435126:1; parent_gene=GRMZM2G317900			0.772711
ARR
BinCode	BinName	id	type	description	ra1	ra2	ra3
27.3.5	RNA.regulation of transcription.ARR	grmzm2g158140_t01	Transcript	weakly similar to ( 120) AT1G59940 | Symbols: ARR3 | ARR3 (RESPONSE REGULATOR 3); transcription regulator/ two-component response regulator | chr1:22065894-22066895 REVERSEmoderately similar to ( 240) loc_os04g36070 12004.m08696 protein OsRR1 - Rice type-A response regulator, expressed seq=cds; coord=10:118838958..118841619:-1; parent_gene=GRMZM2G158140	-0.422409
27.3.5	RNA.regulation of transcription.ARR	grmzm2g319187_t01	Transcript	weakly similar to ( 150) AT3G57040 | Symbols: ARR9, ATRR4 | ARR9 (RESPONSE REGULATOR 9); transcription regulator/ two-component response regulator | chr3:21110059-21111228 FORWARDweakly similar to ( 191) loc_os01g72330 12001.m13268 protein OsRR4 - Rice type-A response regulator, expressed seq=cds; coord=8:157963825..157965109:-1; parent_gene=GRMZM2G319187	-0.654997	-0.833238
27.3.5	RNA.regulation of transcription.ARR	grmzm2g179827_t01	Transcript	weakly similar to ( 122) AT1G59940 | Symbols: ARR3 | ARR3 (RESPONSE REGULATOR 3); transcription regulator/ two-component response regulator | chr1:22065894-22066895 REVERSEmoderately similar to ( 265) loc_os04g36070 12004.m08696 protein OsRR1 - Rice type-A response regulator, expressed seq=cds; coord=2:47362590..47365800:1; parent_gene=GRMZM2G179827	-0.660233
27.3.5	RNA.regulation of transcription.ARR	grmzm2g099797_t01	Transcript	moderately similar to ( 340) AT4G16110 | Symbols: ARR2 | ARR2 (ARABIDOPSIS RESPONSE REGULATOR 2); transcription factor/ two-component response regulator | chr4:9112979-9115785 FORWARDvery weakly similar to (92.0) PRR37_ORYSA Two-component response regulator-like PRR37 (Pseudo-response regulator 37) (OsPRR37) - Oryza sativa (Rice)highly similar to ( 994) loc_os03g12350 12003.m101249 protein two-co…		0.853251	0.693704
27.3.5	RNA.regulation of transcription.ARR	grmzm2g040736_t01	Transcript	weakly similar to ( 135) AT3G48100 | Symbols: ARR5, ATRR2, IBC6 | ARR5 (ARABIDOPSIS RESPONSE REGULATOR 5); transcription regulator/ two-component response regulator | chr3:17759112-17760740 REVERSEweakly similar to ( 189) loc_os04g57720 12004.m10657 protein OsRR6 - Rice type-A response regulator, expressed seq=cds; coord=2:2081848..2082630:-1; parent_gene=GRMZM2G040736			1.03381
pseudo ARR
BinCode	BinName	id	type	description	ra1	ra2	ra3
27.3.66	RNA.regulation of transcription.Psudo ARR transcription factor family	grmzm2g095727_t01	Transcript	moderately similar to ( 254) AT5G02810 | Symbols: PRR7, APRR7 | PRR7 (PSEUDO-RESPONSE REGULATOR 7); transcription regulator/ two-component response regulator | chr5:638283-641461 REVERSEhighly similar to ( 710) PRR73_ORYSA Two-component response regulator-like PRR73 (Pseudo-response regulator 73) (OsPRR73) - Oryza sativa (Rice)highly similar to ( 710) loc_os03g17570 12003.m34843 protein two-compo…	0.526751
27.3.66	RNA.regulation of transcription.Psudo ARR transcription factor family	grmzm2g005732_t01	Transcript	moderately similar to ( 295) PRR37_ORYSA Two-component response regulator-like PRR37 (Pseudo-response regulator 37) (OsPRR37) - Oryza sativa (Rice)moderately similar to ( 295) loc_os07g49460 12007.m079806 protein two-component response regulator-like PRR37, putative, expressed seq=cds; coord=7:174982376..174985250:1; parent_gene=GRMZM2G005732			-0.541735
27.3.66	RNA.regulation of transcription.Psudo ARR transcription factor family	grmzm2g033962_t01	Transcript	moderately similar to ( 271) AT5G02810 | Symbols: PRR7, APRR7 | PRR7 (PSEUDO-RESPONSE REGULATOR 7); transcription regulator/ two-component response regulator | chr5:638283-641461 REVERSEhighly similar to ( 701) PRR37_ORYSA Two-component response regulator-like PRR37 (Pseudo-response regulator 37) (OsPRR37) - Oryza sativa (Rice)highly similar to ( 701) loc_os07g49460 12007.m079806 protein two-comp…			-0.758102
27.3.66	RNA.regulation of transcription.Psudo ARR transcription factor family	grmzm2g148453_t01	Transcript	very weakly similar to (89.0) AT5G61380 | Symbols: TOC1, APRR1, PRR1 | TOC1 (TIMING OF CAB EXPRESSION 1); transcription regulator/ two-component response regulator | chr5:24675540-24678176 FORWARDmoderately similar to ( 404) PRR1_ORYSA Two-component response regulator-like PRR1 (Pseudo-response regulator 1) (OsPRR1) - Oryza sativa (Rice)moderately similar to ( 404) loc_os02g40510 12002.m33775 pro…			1.33453
Aux/IAA
BinCode	BinName	id	type	description	ra1	ra2	ra3
27.3.40	RNA.regulation of transcription.Aux/IAA family	grmzm2g130953_t01	Transcript	very weakly similar to (94.4) AT1G04250 | Symbols: AXR3, IAA17 | AXR3 (AUXIN RESISTANT 3); transcription factor | chr1:1136382-1138340 FORWARDweakly similar to ( 117) IAA1_ORYSA Auxin-responsive protein IAA1 (Indoleacetic acid-induced protein 1) - Oryza sativa (Rice)weakly similar to ( 117) loc_os01g08320 12001.m07457 protein OsIAA1 - Auxin-responsive Aux/IAA gene family member, expressed seq=cds…	-0.684232		0.778657
27.3.40	RNA.regulation of transcription.Aux/IAA family	grmzm2g573324_t01	Transcript	weakly similar to ( 105) AT2G22670 | Symbols: IAA8 | IAA8; transcription factor | chr2:9637136-9638459 FORWARDweakly similar to ( 161) IAA19_ORYSA Auxin-responsive protein IAA19 (Indoleacetic acid-induced protein 19) - Oryza sativa (Rice)weakly similar to ( 161) loc_os05g48590 12005.m08930 protein OsIAA19 - Auxin-responsive Aux/IAA gene family member, expressed seq=cds; coord=8:68085157..68086874…	-0.915746
27.3.40	RNA.regulation of transcription.Aux/IAA family	grmzm2g000158_t01	Transcript	very weakly similar to (94.0) AT5G43700 | Symbols: ATAUX2-11, IAA4 | ATAUX2-11 (AUXIN INDUCIBLE 2-11); DNA binding / transcription factor | chr5:17550465-17551206 FORWARDweakly similar to ( 164) IAA20_ORYSA Auxin-responsive protein IAA20 (Indoleacetic acid-induced protein 20) - Oryza sativa (Rice)weakly similar to ( 164) loc_os06g07040 12006.m05429 protein OsIAA20 - Auxin-responsive Aux/IAA gene …	-0.886367
27.3.40	RNA.regulation of transcription.Aux/IAA family	grmzm2g359924_t01	Transcript	weakly similar to ( 117) AT3G16500 | Symbols: PAP1, IAA26 | PAP1 (PHYTOCHROME-ASSOCIATED PROTEIN 1); transcription factor | chr3:5612801-5614208 REVERSEweakly similar to ( 146) IAA16_ORYSA Auxin-responsive protein IAA16 (Indoleacetic acid-induced protein 16) - Oryza sativa (Rice)weakly similar to ( 146) loc_os05g09480 12005.m05461 protein OsIAA16 - Auxin-responsive Aux/IAA gene family member, exp…	-0.902164
27.3.40	RNA.regulation of transcription.Aux/IAA family	grmzm2g079957_t01	Transcript	weakly similar to ( 105) AT1G04240 | Symbols: SHY2, IAA3 | SHY2 (SHORT HYPOCOTYL 2); transcription factor | chr1:1128564-1129319 REVERSEweakly similar to ( 146) IAA31_ORYSA Auxin-responsive protein IAA31 (Indoleacetic acid-induced protein 31) - Oryza sativa (Rice)weakly similar to ( 146) loc_os12g40900 12012.m07873 protein OsIAA31 - Auxin-responsive Aux/IAA gene family member, expressed seq=cds; …	-0.820265
27.3.40	RNA.regulation of transcription.Aux/IAA family	grmzm2g037368_t01	Transcript	weakly similar to ( 176) AT2G22670 | Symbols: IAA8 | IAA8; transcription factor | chr2:9637136-9638459 FORWARDmoderately similar to ( 292) IAA5_ORYSA Auxin-responsive protein IAA5 (Indoleacetic acid-induced protein 5) - Oryza sativa (Rice)moderately similar to ( 292) loc_os01g48444 12001.m11036 protein OsIAA5 - Auxin-responsive Aux/IAA gene family member, expressed seq=cds; coord=3:209094740..209…	-0.700084		0.881423
27.3.40	RNA.regulation of transcription.Aux/IAA family	grmzm5g864847_t01	Transcript	weakly similar to ( 146) AT3G16500 | Symbols: PAP1, IAA26 | PAP1 (PHYTOCHROME-ASSOCIATED PROTEIN 1); transcription factor | chr3:5612801-5614208 REVERSEweakly similar to ( 176) IAA2_ORYSA Auxin-responsive protein IAA2 (Indoleacetic acid-induced protein 2) - Oryza sativa (Rice)weakly similar to ( 176) loc_os01g09450 12001.m42898 protein OsIAA2 - Auxin-responsive Aux/IAA gene family member, express…	-0.827706
27.3.40	RNA.regulation of transcription.Aux/IAA family	grmzm2g115357_t01	Transcript	weakly similar to ( 105) IAA24_ORYSA Auxin-responsive protein IAA24 (Indoleacetic acid-induced protein 24) - Oryza sativa (Rice)weakly similar to ( 105) loc_os07g08460 12007.m29084 protein OsIAA24 - Auxin-responsive Aux/IAA gene family member, expressed seq=cds; coord=7:10970395..10971733:-1; parent_gene=GRMZM2G115357	0.808768		1.57906
27.3.40	RNA.regulation of transcription.Aux/IAA family	grmzm2g030465_t01	Transcript	weakly similar to ( 133) IAA9_ORYSA Auxin-responsive protein IAA9 (Indoleacetic acid-induced protein 9) - Oryza sativa (Rice)weakly similar to ( 133) loc_os02g56120 12002.m100401 protein OsIAA9 - Auxin-responsive Aux/IAA gene family member, expressed seq=cds; coord=5:214411995..214413229:1; parent_gene=GRMZM2G030465	-0.702768
27.3.40	RNA.regulation of transcription.Aux/IAA family	grmzm2g077356_t01	Transcript	weakly similar to ( 171) AT3G04730 | Symbols: IAA16 | IAA16; transcription factor | chr3:1288993-1290415 REVERSEmoderately similar to ( 226) IAA13_ORYSA Auxin-responsive protein IAA13 (Indoleacetic acid-induced protein 13) - Oryza sativa (Rice)moderately similar to ( 226) loc_os03g53150 12003.m10289 protein OsIAA13 - Auxin-responsive Aux/IAA gene family member, expressed seq=cds; coord=5:7772505.…	-0.654315
27.3.40	RNA.regulation of transcription.Aux/IAA family	grmzm2g163848_t01	Transcript	weakly similar to ( 174) AT2G22670 | Symbols: IAA8 | IAA8; transcription factor | chr2:9637136-9638459 FORWARDmoderately similar to ( 286) IAA5_ORYSA Auxin-responsive protein IAA5 (Indoleacetic acid-induced protein 5) - Oryza sativa (Rice)moderately similar to ( 286) loc_os01g48444 12001.m11036 protein OsIAA5 - Auxin-responsive Aux/IAA gene family member, expressed seq=cds; coord=8:150560609..150…	-0.790551
27.3.40	RNA.regulation of transcription.Aux/IAA family	grmzm2g004696_t01	Transcript	weakly similar to ( 161) AT1G04250 | Symbols: AXR3, IAA17 | AXR3 (AUXIN RESISTANT 3); transcription factor | chr1:1136382-1138340 FORWARDmoderately similar to ( 245) IAA1_ORYSA Auxin-responsive protein IAA1 (Indoleacetic acid-induced protein 1) - Oryza sativa (Rice)moderately similar to ( 245) loc_os01g08320 12001.m07457 protein OsIAA1 - Auxin-responsive Aux/IAA gene family member, expressed seq=…	-0.805831
27.3.40	RNA.regulation of transcription.Aux/IAA family	grmzm2g048131_t01	Transcript	weakly similar to ( 111) AT1G04250 | Symbols: AXR3, IAA17 | AXR3 (AUXIN RESISTANT 3); transcription factor | chr1:1136382-1138340 FORWARDmoderately similar to ( 227) IAA26_ORYSA Auxin-responsive protein IAA26 (Indoleacetic acid-induced protein 26) - Oryza sativa (Rice)moderately similar to ( 227) loc_os09g35870 12009.m06538 protein OsIAA26 - Auxin-responsive Aux/IAA gene family member, expressed …	-1.01275
27.3.40	RNA.regulation of transcription.Aux/IAA family	grmzm2g138268_t01	Transcript	moderately similar to ( 244) AT3G04730 | Symbols: IAA16 | IAA16; transcription factor | chr3:1288993-1290415 REVERSEmoderately similar to ( 287) IAA30_ORYSA Auxin-responsive protein IAA30 (Indoleacetic acid-induced protein 30) - Oryza sativa (Rice)moderately similar to ( 287) loc_os12g40890 12012.m07872 protein OsIAA30 - Auxin-responsive Aux/IAA gene family member, expressed seq=cds; coord=3:1177…			0.740038
27.3.40	RNA.regulation of transcription.Aux/IAA family	grmzm2g079200_t01	Transcript	weakly similar to ( 132) AT1G04250 | Symbols: AXR3, IAA17 | AXR3 (AUXIN RESISTANT 3); transcription factor | chr1:1136382-1138340 FORWARDmoderately similar to ( 207) IAA23_ORYSA Auxin-responsive protein IAA23 (Indoleacetic acid-induced protein 23) - Oryza sativa (Rice)moderately similar to ( 207) loc_os06g39590 12006.m31888 protein OsIAA23 - Auxin-responsive Aux/IAA gene family member, expressed …			0.838097
bHLH
BinCode	BinName	id	type	description	ra1	ra2	ra3
27.3.6	RNA.regulation of transcription.bHLH,Basic Helix-Loop-Helix family	grmzm2g033356_t01	Transcript	moderately similar to ( 286) AT3G26744 | Symbols: ICE1, ATICE1, SCRM | ICE1 (INDUCER OF CBF EXPRESSION 1); DNA binding / transcription activator/ transcription factor | chr3:9832953-9834790 REVERSEmoderately similar to ( 444) loc_os11g32100 12011.m07112 protein helix-loop-helix DNA-binding, putative, expressed seq=cds; coord=4:23423617..23427358:1; parent_gene=GRMZM2G033356	-0.687463
27.3.6	RNA.regulation of transcription.bHLH,Basic Helix-Loop-Helix family	grmzm2g062541_t01	Transcript	weakly similar to ( 111) AT1G09530 | Symbols: PIF3, POC1, PAP3 | PIF3 (PHYTOCHROME INTERACTING FACTOR 3); DNA binding / protein binding / transcription factor/ transcription regulator | chr1:3077216-3079367 FORWARDmoderately similar to ( 253) loc_os05g04740 12005.m05005 protein basic helix-loop-helix dimerisation region bHLH, putative, expressed seq=cds; coord=10:87690145..87692179:1; parent_gene…	-0.916855
27.3.6	RNA.regulation of transcription.bHLH,Basic Helix-Loop-Helix family	grmzm2g011269_t01	Transcript	moderately similar to ( 415) AT1G52870 | Symbols: | peroxisomal membrane protein-related | chr1:19685856-19687678 FORWARDhighly similar to ( 503) loc_os03g38730 12003.m35298 protein mpv17 / PMP22 family protein, expressed seq=cds; coord=1:246463972..246468478:1; parent_gene=GRMZM2G011269	-0.749552
27.3.6	RNA.regulation of transcription.bHLH,Basic Helix-Loop-Helix family	grmzm5g832135_t01	Transcript	weakly similar to ( 111) AT4G30980 | Symbols: | basic helix-loop-helix (bHLH) family protein | chr4:15079489-15081606 REVERSEweakly similar to ( 134) loc_os02g55250 12002.m10551 protein BHLH transcription factor, putative, expressed seq=cds; coord=5:213590517..213599195:1; parent_gene=GRMZM5G832135	-0.716966
27.3.6	RNA.regulation of transcription.bHLH,Basic Helix-Loop-Helix family	grmzm2g173372_t01	Transcript	weakly similar to ( 200) AT5G65640 | Symbols: bHLH093 | bHLH093 (beta HLH protein 93); DNA binding / transcription factor | chr5:26237137-26238635 FORWARDmoderately similar to ( 376) loc_os03g04310 12003.m101180 protein DNA binding protein, putative, expressed seq=cds; coord=1:7996054..7998214:-1; parent_gene=GRMZM2G173372	-2.37857
27.3.6	RNA.regulation of transcription.bHLH,Basic Helix-Loop-Helix family	grmzm2g173534_t01	Transcript	moderately similar to ( 287) AT3G26744 | Symbols: ICE1, ATICE1, SCRM | ICE1 (INDUCER OF CBF EXPRESSION 1); DNA binding / transcription activator/ transcription factor | chr3:9832953-9834790 REVERSEmoderately similar to ( 415) loc_os01g70310 12001.m150831 protein inducer of CBF expression 2, putative, expressed seq=cds; coord=3:156362362..156365307:1; parent_gene=GRMZM2G173534	-0.86924
27.3.6	RNA.regulation of transcription.bHLH,Basic Helix-Loop-Helix family	grmzm2g043854_t01	Transcript	weakly similar to ( 164) AT1G68810 | Symbols: | basic helix-loop-helix (bHLH) family protein | chr1:25861289-25862882 FORWARDmoderately similar to ( 248) loc_os03g15440 12003.m06981 protein DNA binding protein, putative, expressed seq=cds; coord=9:141434879..141438278:-1; parent_gene=GRMZM2G043854	-1.15093
27.3.6	RNA.regulation of transcription.bHLH,Basic Helix-Loop-Helix family	grmzm2g144275_t01	Transcript	weakly similar to ( 108) AT1G68920 | Symbols: | basic helix-loop-helix (bHLH) family protein | chr1:25915620-25917675 FORWARDmoderately similar to ( 231) loc_os09g32510 12009.m22151 protein BHLH transcription factor, putative, expressed seq=cds; coord=7:137485911..137488421:1; parent_gene=GRMZM2G144275	-0.546924
27.3.6	RNA.regulation of transcription.bHLH,Basic Helix-Loop-Helix family	grmzm2g042895_t01	Transcript	weakly similar to ( 104) AT4G29930 | Symbols: | basic helix-loop-helix (bHLH) family protein | chr4:14644108-14645168 FORWARDweakly similar to ( 127) loc_os04g23550 12004.m101486 protein DNA binding like, putative, expressed seq=cds; coord=10:76586652..76588863:1; parent_gene=GRMZM2G042895	1.41381		3.05834
27.3.6	RNA.regulation of transcription.bHLH,Basic Helix-Loop-Helix family	grmzm2g385543_t01	Transcript	weakly similar to ( 186) AT1G68920 | Symbols: | basic helix-loop-helix (bHLH) family protein | chr1:25915620-25917675 FORWARDmoderately similar to ( 412) loc_os03g51910 12003.m10170 protein BHLH transcription factor, putative, expressed seq=cds; coord=5:9118885..9120925:1; parent_gene=GRMZM2G385543	0.678837	1.04306	1.08826
27.3.6	RNA.regulation of transcription.bHLH,Basic Helix-Loop-Helix family	grmzm5g879527_t01	Transcript	weakly similar to ( 113) AT2G42280 | Symbols: | basic helix-loop-helix (bHLH) family protein | chr2:17611891-17613163 REVERSEmoderately similar to ( 267) loc_os08g39630 12008.m26738 protein DNA binding protein, putative, expressed seq=cds; coord=1:188031610..188034600:1; parent_gene=GRMZM5G879527	-0.638949		-0.676344
27.3.6	RNA.regulation of transcription.bHLH,Basic Helix-Loop-Helix family	grmzm2g085467_t01	Transcript	moderately similar to ( 203) loc_os09g31300 12009.m22140 protein helix-loop-helix DNA-binding domain containing protein, expressed seq=cds; coord=7:132889939..132891382:1; parent_gene=GRMZM2G085467	-0.986549
27.3.6	RNA.regulation of transcription.bHLH,Basic Helix-Loop-Helix family	grmzm2g316758_t01	Transcript	very weakly similar to (95.5) AT2G24260 | Symbols: | basic helix-loop-helix (bHLH) family protein | chr2:10319646-10322177 REVERSEmoderately similar to ( 216) loc_os06g08500 12006.m05569 protein BHLH transcription factor, putative seq=cds; coord=4:174002078..174004419:-1; parent_gene=GRMZM2G316758	-1.01558
27.3.6	RNA.regulation of transcription.bHLH,Basic Helix-Loop-Helix family	grmzm2g176141_t01	Transcript	weakly similar to ( 146) AT1G68810 | Symbols: | basic helix-loop-helix (bHLH) family protein | chr1:25861289-25862882 FORWARDmoderately similar to ( 253) loc_os09g24490 12009.m05603 protein helix-loop-helix DNA-binding domain containing protein, expressed seq=cds; coord=2:180155096..180158005:-1; parent_gene=GRMZM2G176141	-1.25051
27.3.6	RNA.regulation of transcription.bHLH,Basic Helix-Loop-Helix family	grmzm2g417597_t01	Transcript	weakly similar to ( 162) AT2G42280 | Symbols: | basic helix-loop-helix (bHLH) family protein | chr2:17611891-17613163 REVERSEmoderately similar to ( 219) loc_os09g31300 12009.m22140 protein helix-loop-helix DNA-binding domain containing protein, expressed seq=cds; coord=2:189701055..189703654:1; parent_gene=GRMZM2G417597	-1.31217
27.3.6	RNA.regulation of transcription.bHLH,Basic Helix-Loop-Helix family	grmzm2g049229_t01	Transcript	moderately similar to ( 367) AT1G32640 | Symbols: ATMYC2, RD22BP1, JAI1, JIN1, MYC2, ZBF1 | MYC2; DNA binding / transcription activator/ transcription factor | chr1:11799042-11800913 REVERSEhighly similar to ( 740) loc_os10g42430 12010.m06996 protein transcription factor MYC7E, putative, expressed seq=cds; coord=9:112004919..112007822:-1; parent_gene=GRMZM2G049229	-0.589844
27.3.6	RNA.regulation of transcription.bHLH,Basic Helix-Loop-Helix family	grmzm2g112428_t01	Transcript	very weakly similar to ( 100) loc_os03g19780 12003.m07393 protein expressed protein seq=cds; coord=9:134571815..134573167:-1; parent_gene=GRMZM2G112428	-0.906432		0.786858
27.3.6	RNA.regulation of transcription.bHLH,Basic Helix-Loop-Helix family	grmzm2g119823_t01	Transcript	very weakly similar to (95.5) AT5G57150 | Symbols: | basic helix-loop-helix (bHLH) family protein | chr5:23152361-23153293 FORWARDweakly similar to ( 121) loc_os04g23550 12004.m101486 protein DNA binding like, putative, expressed seq=cds; coord=10:105618200..105620708:-1; parent_gene=GRMZM2G119823	1.84156		2.97596
27.3.6	RNA.regulation of transcription.bHLH,Basic Helix-Loop-Helix family	grmzm2g017349_t01	Transcript	weakly similar to ( 123) AT4G36930 | Symbols: SPT | SPT (SPATULA); DNA binding / transcription factor | chr4:17414167-17415945 FORWARDmoderately similar to ( 275) loc_os06g06900 12006.m05415 protein helix-loop-helix DNA-binding domain containing protein, expressed seq=cds; coord=9:16485686..16489619:-1; parent_gene=GRMZM2G017349	-0.759394
27.3.6	RNA.regulation of transcription.bHLH,Basic Helix-Loop-Helix family	grmzm2g082586_t01	Transcript	weakly similar to ( 138) AT1G72210 | Symbols: | basic helix-loop-helix (bHLH) family protein (bHLH096) | chr1:27180066-27182268 FORWARDmoderately similar to ( 207) loc_os09g29360 12009.m06087 protein DNA binding protein, putative, expressed seq=cds; coord=7:128707588..128709815:1; parent_gene=GRMZM2G082586	-1.21944
27.3.6	RNA.regulation of transcription.bHLH,Basic Helix-Loop-Helix family	grmzm2g041636_t01	Transcript	very weakly similar to (80.5) loc_os03g19780 12003.m07393 protein expressed protein seq=cds; coord=7:174327890..174328868:-1; parent_gene=GRMZM2G041636	-1.2904
27.3.6	RNA.regulation of transcription.bHLH,Basic Helix-Loop-Helix family	grmzm2g111146_t01	Transcript	weakly similar to ( 171) AT5G46690 | Symbols: bHLH071 | bHLH071 (beta HLH protein 71); DNA binding / transcription factor | chr5:18945639-18947434 FORWARDmoderately similar to ( 295) loc_os02g46560 12002.m09693 protein helix-loop-helix DNA-binding domain containing protein, expressed seq=cds; coord=5:198776715..198780355:-1; parent_gene=GRMZM2G111146	-0.985177
27.3.6	RNA.regulation of transcription.bHLH,Basic Helix-Loop-Helix family	grmzm2g113257_t01	Transcript	very weakly similar to (99.8) loc_os09g28900 12009.m06041 protein DNA binding protein, putative seq=cds; coord=2:187124455..187125540:1; parent_gene=GRMZM2G113257	-1.2588		-1.01284
27.3.6	RNA.regulation of transcription.bHLH,Basic Helix-Loop-Helix family	grmzm2g162382_t01	Transcript	weakly similar to ( 170) AT4G02590 | Symbols: UNE12 | UNE12 (unfertilized embryo sac 12); DNA binding / transcription factor | chr4:1137968-1140117 REVERSEmoderately similar to ( 263) loc_os03g58330 12003.m10743 protein BHLH transcription factor, putative, expressed seq=cds; coord=7:10694109..10698145:-1; parent_gene=GRMZM2G162382	-0.793382
27.3.6	RNA.regulation of transcription.bHLH,Basic Helix-Loop-Helix family	grmzm2g008691_t01	Transcript	weakly similar to ( 128) AT1G22490 | Symbols: | basic helix-loop-helix (bHLH) family protein | chr1:7938448-7940489 REVERSEweakly similar to ( 193) loc_os02g52190 12002.m10250 protein DNA binding protein, putative, expressed seq=cds; coord=4:179801255..179803482:-1; parent_gene=GRMZM2G008691	-0.927023
27.3.6	RNA.regulation of transcription.bHLH,Basic Helix-Loop-Helix family	grmzm2g045431_t01	Transcript	weakly similar to ( 133) AT5G67060 | Symbols: HEC1 | HEC1 (HECATE 1); transcription factor | chr5:26766276-26767001 FORWARDweakly similar to ( 191) loc_os09g28210 12009.m05972 protein DNA binding protein, putative, expressed seq=cds; coord=7:125320260..125322290:1; parent_gene=GRMZM2G045431	-1.64742
27.3.6	RNA.regulation of transcription.bHLH,Basic Helix-Loop-Helix family	grmzm2g036092_t01	Transcript	very weakly similar to ( 100) AT1G26945 | Symbols: KDR | KDR (KIDARI); transcription regulator | chr1:9351571-9352474 FORWARDweakly similar to ( 155) loc_os02g51320 12002.m10166 protein DNA binding protein, putative, expressed seq=cds; coord=5:207504983..207506597:-1; parent_gene=GRMZM2G036092	-0.876757
27.3.6	RNA.regulation of transcription.bHLH,Basic Helix-Loop-Helix family	grmzm2g139029_t01	Transcript	very weakly similar to (83.6) AT1G29950 | Symbols: | transcription factor/ transcription regulator | chr1:10493461-10494216 FORWARDmoderately similar to ( 223) loc_os03g39432 12003.m101391 protein helix-loop-helix DNA-binding domain containing protein, expressed seq=cds; coord=6:110807326..110809938:1; parent_gene=GRMZM2G139029	-0.706459
27.3.6	RNA.regulation of transcription.bHLH,Basic Helix-Loop-Helix family	grmzm2g350165_t01	Transcript	weakly similar to ( 144) AT2G24260 | Symbols: | basic helix-loop-helix (bHLH) family protein | chr2:10319646-10322177 REVERSEweakly similar to ( 168) loc_os09g25040 12009.m05657 protein BHLH transcription factor, putative, expressed seq=cds; coord=2:180661038..180664197:1; parent_gene=GRMZM2G350165	-0.810699
27.3.6	RNA.regulation of transcription.bHLH,Basic Helix-Loop-Helix family	grmzm2g397518_t01	Transcript	very weakly similar to (98.2) AT5G01310 | Symbols: | basic helix-loop-helix (bHLH) family protein | chr5:125304-128960 FORWARDmoderately similar to ( 212) LAX_ORYSA Transcription factor LAX PANICLE - Oryza sativa (Rice)moderately similar to ( 212) loc_os01g61480 12001.m12274 protein transcription factor LAX PANICLE, putative, expressed seq=cds; coord=3:183084299..183085268:1; parent_gene=GRMZM2G3…	-0.895292
27.3.6	RNA.regulation of transcription.bHLH,Basic Helix-Loop-Helix family	grmzm2g098988_t01	Transcript	weakly similar to ( 102) AT1G29950 | Symbols: | transcription factor/ transcription regulator | chr1:10493461-10494216 FORWARDmoderately similar to ( 290) loc_os03g39432 12003.m101391 protein helix-loop-helix DNA-binding domain containing protein, expressed seq=cds; coord=9:77700339..77702948:1; parent_gene=GRMZM2G098988	-0.557522
27.3.6	RNA.regulation of transcription.bHLH,Basic Helix-Loop-Helix family	grmzm2g045883_t01	Transcript	very weakly similar to (90.1) AT1G22490 | Symbols: | basic helix-loop-helix (bHLH) family protein | chr1:7938448-7940489 REVERSEmoderately similar to ( 243) loc_os02g52190 12002.m10250 protein DNA binding protein, putative, expressed seq=cds; coord=5:208895710..208901046:-1; parent_gene=GRMZM2G045883	-1.41076
27.3.6	RNA.regulation of transcription.bHLH,Basic Helix-Loop-Helix family	grmzm2g081816_t01	Transcript	weakly similar to ( 131) AT3G21330 | Symbols: | basic helix-loop-helix (bHLH) family protein | chr3:7507720-7508841 FORWARDvery weakly similar to (80.9) LAX_ORYSA Transcription factor LAX PANICLE - Oryza sativa (Rice)moderately similar to ( 216) loc_os01g38610 12001.m10144 protein DNA binding protein, putative, expressed seq=cds; coord=3:219181998..219183697:-1; parent_gene=GRMZM2G081816	-0.731339
27.3.6	RNA.regulation of transcription.bHLH,Basic Helix-Loop-Helix family	grmzm2g145146_t01	Transcript	weakly similar to ( 131) loc_os09g28900 12009.m06041 protein DNA binding protein, putative seq=cds; coord=7:127585573..127586752:1; parent_gene=GRMZM2G145146	-1.19076
27.3.6	RNA.regulation of transcription.bHLH,Basic Helix-Loop-Helix family	grmzm2g031656_t01	Transcript	moderately similar to ( 314) AT2G27230 | Symbols: LHW | LHW (LONESOME HIGHWAY); protein homodimerization/ transcription activator/ transcription factor | chr2:11650895-11653840 FORWARDnearly identical (1246) loc_os12g06330 12012.m04623 protein expressed protein seq=cds; coord=10:7121194..7126844:1; parent_gene=GRMZM2G031656		0.968328
27.3.6	RNA.regulation of transcription.bHLH,Basic Helix-Loop-Helix family	grmzm2g460472_t01	Transcript	moderately similar to ( 266) AT2G27230 | Symbols: LHW | LHW (LONESOME HIGHWAY); protein homodimerization/ transcription activator/ transcription factor | chr2:11650895-11653840 FORWARDnearly identical (1065) loc_os11g06010 12011.m04797 protein helix-loop-helix DNA-binding, putative, expressed seq=cds; coord=2:140657254..140663126:-1; parent_gene=GRMZM2G460472		1.01004
27.3.6	RNA.regulation of transcription.bHLH,Basic Helix-Loop-Helix family	grmzm2g180458_t01	Transcript	weakly similar to ( 110) AT1G23780 | Symbols: | F-box family protein | chr1:8407053-8408480 REVERSEmoderately similar to ( 436) loc_os03g12940 12003.m35112 protein helix-loop-helix DNA-binding domain containing protein, expressed seq=cds; coord=1:29254237..29256101:1; parent_gene=GRMZM2G180458		1.14807	0.90393
27.3.6	RNA.regulation of transcription.bHLH,Basic Helix-Loop-Helix family	grmzm2g006631_t01	Transcript	weakly similar to ( 180) AT1G72210 | Symbols: | basic helix-loop-helix (bHLH) family protein (bHLH096) | chr1:27180066-27182268 FORWARDmoderately similar to ( 245) loc_os03g08930 12003.m35054 protein helix-loop-helix-like protein, putative, expressed seq=cds; coord=1:19099991..19102005:1; parent_gene=GRMZM2G006631			0.826904
27.3.6	RNA.regulation of transcription.bHLH,Basic Helix-Loop-Helix family	grmzm2g008898_t01	Transcript	weakly similar to ( 180) AT1G59640 | Symbols: ZCW32, BPEP | ZCW32; DNA binding / transcription factor | chr1:21909635-21911030 REVERSEmoderately similar to ( 268) loc_os07g09590 12007.m05414 protein bHLH transcription factor, putative, expressed seq=cds; coord=2:232380911..232384091:1; parent_gene=GRMZM2G008898			0.819246
27.3.6	RNA.regulation of transcription.bHLH,Basic Helix-Loop-Helix family	grmzm2g112629_t01	Transcript	weakly similar to ( 190) loc_os01g01870 12001.m06830 protein helix-loop-helix DNA-binding domain containing protein, expressed seq=cds; coord=3:29612994..29616601:-1; parent_gene=GRMZM2G112629			1.30206
27.3.6	RNA.regulation of transcription.bHLH,Basic Helix-Loop-Helix family	grmzm2g024530_t01	Transcript	weakly similar to ( 160) AT5G58010 | Symbols: | basic helix-loop-helix (bHLH) family protein | chr5:23483670-23484889 REVERSEhighly similar to ( 508) loc_os06g09370 12006.m31852 protein helix-loop-helix DNA-binding domain containing protein, expressed seq=cds; coord=9:11560217..11565193:1; parent_gene=GRMZM2G024530			0.944715
27.3.6	RNA.regulation of transcription.bHLH,Basic Helix-Loop-Helix family	grmzm2g095899_t01	Transcript	weakly similar to ( 119) AT2G22770 | Symbols: NAI1 | NAI1; DNA binding / transcription factor | chr2:9684858-9686321 FORWARDmoderately similar to ( 277) loc_os03g46860 12003.m09702 protein DNA binding protein, putative, expressed seq=cds; coord=1:257575165..257578046:-1; parent_gene=GRMZM2G095899			0.89454
27.3.6	RNA.regulation of transcription.bHLH,Basic Helix-Loop-Helix family	grmzm2g301089_t01	Transcript	very weakly similar to (86.7) AT5G43650 | Symbols: | basic helix-loop-helix (bHLH) family protein | chr5:17533310-17534758 REVERSEmoderately similar to ( 241) loc_os03g53020 12003.m10276 protein helix-loop-helix DNA-binding domain containing protein, expressed seq=cds; coord=1:274734582..274736325:1; parent_gene=GRMZM2G301089			1.29371
27.3.6	RNA.regulation of transcription.bHLH,Basic Helix-Loop-Helix family	grmzm2g092091_t01	Transcript	weakly similar to ( 179) AT1G68920 | Symbols: | basic helix-loop-helix (bHLH) family protein | chr1:25915620-25917675 FORWARDmoderately similar to ( 474) loc_os03g51910 12003.m10170 protein BHLH transcription factor, putative, expressed seq=cds; coord=1:272043212..272047015:-1; parent_gene=GRMZM2G092091			0.896237
27.3.6	RNA.regulation of transcription.bHLH,Basic Helix-Loop-Helix family	grmzm2g378653_t01	Transcript	weakly similar to ( 164) AT3G57800 | Symbols: | basic helix-loop-helix (bHLH) family protein | chr3:21408034-21411321 REVERSEmoderately similar to ( 268) loc_os06g41060 12006.m08641 protein BHLH transcription factor, putative, expressed seq=cds; coord=9:101197226..101203564:1; parent_gene=GRMZM2G378653			0.782872
27.3.6	RNA.regulation of transcription.bHLH,Basic Helix-Loop-Helix family	grmzm2g159937_t01	Transcript	weakly similar to ( 174) AT4G16430 | Symbols: | basic helix-loop-helix (bHLH) family protein | chr4:9267599-9269002 FORWARDmoderately similar to ( 494) loc_os01g50940 12001.m11275 protein DNA binding protein, putative, expressed seq=cds; coord=3:204643909..204645969:-1; parent_gene=GRMZM2G159937			1.30951
27.3.6	RNA.regulation of transcription.bHLH,Basic Helix-Loop-Helix family	grmzm2g091003_t01	Transcript	weakly similar to ( 152) AT1G22490 | Symbols: | basic helix-loop-helix (bHLH) family protein | chr1:7938448-7940489 REVERSEmoderately similar to ( 251) loc_os02g46560 12002.m09693 protein helix-loop-helix DNA-binding domain containing protein, expressed seq=cds; coord=4:157480902..157483640:1; parent_gene=GRMZM2G091003			0.910194
27.3.6	RNA.regulation of transcription.bHLH,Basic Helix-Loop-Helix family	grmzm2g009478_t01	Transcript	weakly similar to ( 182) AT1G69010 | Symbols: BIM2 | BIM2 (BES1-interacting Myc-like protein 2); DNA binding / transcription factor | chr1:25941804-25943599 FORWARDhighly similar to ( 531) loc_os09g29930 12009.m060079 protein transcription factor BIM2, putative, expressed seq=cds; coord=2:188529569..188535342:-1; parent_gene=GRMZM2G009478			0.52339
27.3.6	RNA.regulation of transcription.bHLH,Basic Helix-Loop-Helix family	grmzm2g101350_t01	Transcript	weakly similar to ( 101) AT4G34530 | Symbols: CIB1 | CIB1 (CRYPTOCHROME-INTERACTING BASIC-HELIX-LOOP-HELIX 1); DNA binding / transcription factor | chr4:16498466-16499946 FORWARDweakly similar to ( 187) loc_os02g47660 12002.m09800 protein BHLH transcription factor, putative, expressed seq=cds; coord=5:200937343..200940145:-1; parent_gene=GRMZM2G101350			-0.935909
bZIP
BinCode	BinName	id	type	description	ra1	ra2	ra3
27.3.35	RNA.regulation of transcription.bZIP transcription factor family	grmzm2g160902_t01	Transcript	weakly similar to ( 137) OCS1_MAIZE Ocs element-binding factor 1 (OCSBF-1) - Zea mays (Maize)weakly similar to ( 102) loc_os12g37410 12012.m07526 protein ocs element-binding factor 1, putative, expressed seq=cds; coord=3:128934014..128935724:-1; parent_gene=GRMZM2G160902	-0.880841
27.3.35	RNA.regulation of transcription.bZIP transcription factor family	grmzm2g452564_t01	Transcript	weakly similar to ( 184) loc_os01g06560 12001.m07286 protein tumor-related protein, putative, expressed seq=cds; coord=3:15129171..15130638:1; parent_gene=GRMZM2G452564	-0.827029		1.14623
27.3.35	RNA.regulation of transcription.bZIP transcription factor family	grmzm2g136266_t01	Transcript	weakly similar to ( 146) AT1G43700 | Symbols: VIP1 | VIP1 (VIRE2-INTERACTING PROTEIN 1); protein binding / transcription factor | chr1:16484352-16486017 FORWARDweakly similar to ( 139) RF2B_ORYSA Transcription factor RF2b - Oryza sativa (Rice)moderately similar to ( 268) loc_os12g06520 12012.m04642 protein transcription factor PosF21, putative, expressed seq=cds; coord=10:7917294..7921130:1; pare…	-0.555418
27.3.35	RNA.regulation of transcription.bZIP transcription factor family	grmzm2g157177_t01	Transcript	moderately similar to ( 214) AT2G35530 | Symbols: | bZIP transcription factor family protein | chr2:14923280-14926025 REVERSEweakly similar to ( 170) HBP1A_WHEAT Transcription factor HBP-1a (Histone-specific transcription factor HBP1) - Triticum aestivum (Wheat)highly similar to ( 527) loc_os03g13614 12003.m101261 protein transcription factor HBP-1a, putative, expressed seq=cds; coord=1:32158872.…	0.800522	0.923506	0.880945
27.3.35	RNA.regulation of transcription.bZIP transcription factor family	grmzm5g809156_t01	Transcript	very weakly similar to (87.8) RF2B_ORYSA Transcription factor RF2b - Oryza sativa (Rice)very weakly similar to (89.0) loc_os03g21800 12003.m101333 protein transcription factor RF2b, putative, expressed seq=cds; coord=9:131096571..131097209:1; parent_gene=GRMZM5G809156	-2.30074		-1.89703
27.3.35	RNA.regulation of transcription.bZIP transcription factor family	ac232238.2_fgt004	Transcript	moderately similar to ( 345) AT1G08320 | Symbols: | bZIP family transcription factor | chr1:2622113-2627451 REVERSEmoderately similar to ( 295) HBP1B_WHEAT Transcription factor HBP-1b(c38) - Triticum aestivum (Wheat)highly similar to ( 594) loc_os01g64020 12001.m43286 protein transcription factor HBP-1b, putative, expressed seq=cds; coord=8:166791835..166799713:1; parent_gene=AC232238.2_FG004	-1.02816
27.3.35	RNA.regulation of transcription.bZIP transcription factor family	grmzm2g175280_t01	Transcript	moderately similar to ( 209) AT4G38900 | Symbols: | bZIP protein | chr4:18139564-18141520 REVERSEweakly similar to ( 169) RF2B_ORYSA Transcription factor RF2b - Oryza sativa (Rice)moderately similar to ( 391) loc_os08g43090 12008.m08285 protein DNA binding protein, putative, expressed seq=cds; coord=1:197055807..197059608:1; parent_gene=GRMZM2G175280	-0.942015
27.3.35	RNA.regulation of transcription.bZIP transcription factor family	grmzm2g129247_t01	Transcript	weakly similar to ( 120) loc_os05g36160 12005.m07846 protein G-box-binding factor 4, putative, expressed seq=cds; coord=6:150080461..150082967:-1; parent_gene=GRMZM2G129247	-0.898909
27.3.35	RNA.regulation of transcription.bZIP transcription factor family	grmzm2g171912_t01	Transcript	weakly similar to ( 131) AT5G11260 | Symbols: HY5, TED 5 | HY5 (ELONGATED HYPOCOTYL 5); DNA binding / double-stranded DNA binding / transcription factor | chr5:3593583-3594800 REVERSEweakly similar to ( 171) loc_os01g07880 12001.m07415 protein transcription factor HY5, putative, expressed seq=cds; coord=8:17662835..17663659:-1; parent_gene=GRMZM2G171912	-2.03047	-0.821543	-0.724965
27.3.35	RNA.regulation of transcription.bZIP transcription factor family	grmzm2g149150_t01	Transcript	moderately similar to ( 223) AT4G38900 | Symbols: | bZIP protein | chr4:18139564-18141520 REVERSEweakly similar to ( 170) RF2B_ORYSA Transcription factor RF2b - Oryza sativa (Rice)moderately similar to ( 350) loc_os08g43090 12008.m08285 protein DNA binding protein, putative, expressed seq=cds; coord=4:194761789..194765861:1; parent_gene=GRMZM2G149150	-0.911328
27.3.35	RNA.regulation of transcription.bZIP transcription factor family	grmzm2g077124_t01	Transcript	weakly similar to ( 119) AT2G41070 | Symbols: EEL, ATBZIP12, DPBF4 | EEL (ENHANCED EM LEVEL); DNA binding / transcription factor | chr2:17131249-17132208 FORWARDweakly similar to ( 166) loc_os07g48660 12007.m09077 protein EEL, putative, expressed seq=cds; coord=7:174278152..174280865:-1; parent_gene=GRMZM2G077124	-0.727445
27.3.35	RNA.regulation of transcription.bZIP transcription factor family	grmzm2g438293_t01	Transcript	weakly similar to ( 155) loc_os01g64730 12001.m43299 protein G-box-binding factor 4, putative, expressed seq=cds; coord=8:166440248..166441875:1; parent_gene=GRMZM2G438293	-1.10987
27.3.35	RNA.regulation of transcription.bZIP transcription factor family	grmzm2g095078_t01	Transcript	weakly similar to ( 115) AT2G35530 | Symbols: | bZIP transcription factor family protein | chr2:14923280-14926025 REVERSEmoderately similar to ( 202) EMBP1_WHEAT DNA-binding protein EMBP-1 (Histone promoter-binding protein 1a(1)) (HBP-1a(1)) - Triticum aestivum (Wheat)moderately similar to ( 399) loc_os07g10890 12007.m05544 protein DNA-binding protein EMBP-1, putative, expressed seq=cds; coord=7:…	-0.859785
27.3.35	RNA.regulation of transcription.bZIP transcription factor family	grmzm2g133331_t01	Transcript	moderately similar to ( 368) AT1G68640 | Symbols: PAN | PAN (PERIANTHIA); DNA binding / transcription factor | chr1:25769739-25772303 REVERSEmoderately similar to ( 384) HBP1C_WHEAT Transcription factor HBP-1b(c1) (Fragment) - Triticum aestivum (Wheat)moderately similar to ( 468) loc_os06g15480 12006.m32041 protein transcription factor HBP-1b, putative, expressed seq=cds; coord=6:116751859..11675…	-0.854348	-0.912636	-0.549076
27.3.35	RNA.regulation of transcription.bZIP transcription factor family	grmzm2g175870_t01	Transcript	weakly similar to ( 114) AT2G16770 | Symbols: | DNA binding / transcription factor | chr2:7279859-7280817 FORWARDmoderately similar to ( 258) loc_os05g41540 12005.m08329 protein DNA binding protein, putative, expressed seq=cds; coord=6:156036227..156038097:-1; parent_gene=GRMZM2G175870	-0.412839
27.3.35	RNA.regulation of transcription.bZIP transcription factor family	grmzm2g098904_t01	Transcript	weakly similar to ( 129) AT5G24800 | Symbols: ATBZIP9, BZO2H2, BZIP9 | BZIP9 (BASIC LEUCINE ZIPPER 9); DNA binding / protein heterodimerization/ transcription factor | chr5:8515259-8516541 FORWARDweakly similar to ( 115) CPRF2_PETCR Light-inducible protein CPRF-2 - Petroselinum crispum (Parsley) (Petroselinum hortense)moderately similar to ( 241) loc_os02g07840 12002.m33342 protein regulatory pro…	-0.802087
27.3.35	RNA.regulation of transcription.bZIP transcription factor family	grmzm5g858197_t01	Transcript	weakly similar to ( 124) loc_os01g64730 12001.m43299 protein G-box-binding factor 4, putative, expressed seq=cds; coord=3:175629682..175630604:1; parent_gene=GRMZM5G858197	-0.910762
27.3.35	RNA.regulation of transcription.bZIP transcription factor family	grmzm2g039828_t01	Transcript	weakly similar to ( 117) AT5G11260 | Symbols: HY5, TED 5 | HY5 (ELONGATED HYPOCOTYL 5); DNA binding / double-stranded DNA binding / transcription factor | chr5:3593583-3594800 REVERSEweakly similar to ( 170) loc_os01g07880 12001.m07415 protein transcription factor HY5, putative, expressed seq=cds; coord=3:11631147..11632633:1; parent_gene=GRMZM2G039828	-1.19372
27.3.35	RNA.regulation of transcription.bZIP transcription factor family	grmzm2g444748_t01	Transcript	very weakly similar to (93.2) AT4G34590 | Symbols: ATB2, GBF6, AtbZIP11, BZIP11 | GBF6 (G-BOX BINDING FACTOR 6); DNA binding / protein heterodimerization/ transcription factor | chr4:16522449-16522928 FORWARDweakly similar to ( 161) loc_os02g03960 12002.m05745 protein ocs element-binding factor 1, putative, expressed seq=cds; coord=5:74917784..74919651:-1; parent_gene=GRMZM2G444748	-0.633139
27.3.35	RNA.regulation of transcription.bZIP transcription factor family	grmzm2g444743_t01	Transcript	very weakly similar to (91.3) AT4G34590 | Symbols: ATB2, GBF6, AtbZIP11, BZIP11 | GBF6 (G-BOX BINDING FACTOR 6); DNA binding / protein heterodimerization/ transcription factor | chr4:16522449-16522928 FORWARDweakly similar to ( 149) loc_os02g03960 12002.m05745 protein ocs element-binding factor 1, putative, expressed seq=cds; coord=5:74917750..74919188:1; parent_gene=GRMZM2G444743	-0.936371
27.3.35	RNA.regulation of transcription.bZIP transcription factor family	grmzm2g132868_t01	Transcript	weakly similar to ( 186) loc_os05g36160 12005.m07846 protein G-box-binding factor 4, putative, expressed seq=cds; coord=8:100710548..100714109:1; parent_gene=GRMZM2G132868	-0.960397
27.3.35	RNA.regulation of transcription.bZIP transcription factor family	grmzm2g024851_t01	Transcript	moderately similar to ( 212) AT1G58110 | Symbols: | bZIP family transcription factor | chr1:21515919-21517374 REVERSEmoderately similar to ( 405) loc_os11g11100 12011.m05303 protein DNA binding protein, putative, expressed seq=cds; coord=3:138878960..138882994:1; parent_gene=GRMZM2G024851		0.939149	0.841185
27.3.35	RNA.regulation of transcription.bZIP transcription factor family	grmzm2g062391_t01	Transcript	moderately similar to ( 219) AT2G40620 | Symbols: | bZIP transcription factor family protein | chr2:16954804-16956872 REVERSEmoderately similar to ( 323) RF2B_ORYSA Transcription factor RF2b - Oryza sativa (Rice)moderately similar to ( 324) loc_os03g21800 12003.m101333 protein transcription factor RF2b, putative, expressed seq=cds; coord=1:56215993..56221441:1; parent_gene=GRMZM2G062391		0.850626	1.02469
27.3.35	RNA.regulation of transcription.bZIP transcription factor family	grmzm2g149040_t01	Transcript	moderately similar to ( 261) AT2G40620 | Symbols: | bZIP transcription factor family protein | chr2:16954804-16956872 REVERSEmoderately similar to ( 383) RF2B_ORYSA Transcription factor RF2b - Oryza sativa (Rice)moderately similar to ( 439) loc_os07g48180 12007.m09032 protein transcription factor RF2b, putative, expressed seq=cds; coord=7:173148589..173154260:-1; parent_gene=GRMZM2G149040			0.810778
27.3.35	RNA.regulation of transcription.bZIP transcription factor family	grmzm2g353553_t01	Transcript	weakly similar to ( 191) AT4G38900 | Symbols: | bZIP protein | chr4:18139564-18141520 REVERSEweakly similar to ( 129) RF2A_ORYSA Transcription factor RF2a - Oryza sativa (Rice)moderately similar to ( 366) loc_os10g38820 12010.m06649 protein transcription factor RF2a, putative, expressed seq=cds; coord=1:81918413..81920944:-1; parent_gene=GRMZM2G353553			1.61378
27.3.35	RNA.regulation of transcription.bZIP transcription factor family	grmzm2g019446_t01	Transcript	weakly similar to ( 127) AT5G28770 | Symbols: BZO2H3 | BZO2H3; DNA binding / protein heterodimerization/ transcription factor | chr5:10796907-10798147 REVERSEweakly similar to ( 193) CPRF2_PETCR Light-inducible protein CPRF-2 - Petroselinum crispum (Parsley) (Petroselinum hortense)moderately similar to ( 446) loc_os03g58250 12003.m35458 protein regulatory protein opaque-2, putative, expressed seq…			0.600877
27.3.35	RNA.regulation of transcription.bZIP transcription factor family	grmzm5g821024_t01	Transcript	weakly similar to ( 162) AT1G43700 | Symbols: VIP1 | VIP1 (VIRE2-INTERACTING PROTEIN 1); protein binding / transcription factor | chr1:16484352-16486017 FORWARDweakly similar to ( 150) RF2A_ORYSA Transcription factor RF2a - Oryza sativa (Rice)moderately similar to ( 277) loc_os12g06520 12012.m04642 protein transcription factor PosF21, putative, expressed seq=cds; coord=2:140322684..140326990:-1; …			0.846916
27.3.35	RNA.regulation of transcription.bZIP transcription factor family	grmzm2g428184_t01	Transcript	weakly similar to ( 189) AT4G38900 | Symbols: | bZIP protein | chr4:18139564-18141520 REVERSEweakly similar to ( 147) RF2A_ORYSA Transcription factor RF2a - Oryza sativa (Rice)moderately similar to ( 412) loc_os03g03550 12003.m05888 protein DNA binding protein, putative, expressed seq=cds; coord=1:5744705..5747988:1; parent_gene=GRMZM2G428184			1.14239
27.3.35	RNA.regulation of transcription.bZIP transcription factor family	grmzm2g146020_t01	Transcript	weakly similar to ( 110) AT2G40620 | Symbols: | bZIP transcription factor family protein | chr2:16954804-16956872 REVERSEweakly similar to ( 112) RF2B_ORYSA Transcription factor RF2b - Oryza sativa (Rice)weakly similar to ( 187) loc_os12g06520 12012.m04642 protein transcription factor PosF21, putative, expressed seq=cds; coord=3:142735565..142740089:-1; parent_gene=GRMZM2G146020			0.806967
27.3.35	RNA.regulation of transcription.bZIP transcription factor family	grmzm2g030280_t01	Transcript	moderately similar to ( 380) AT3G12250 | Symbols: TGA6, BZIP45 | TGA6 (TGACG MOTIF-BINDING FACTOR 6); DNA binding / transcription factor | chr3:3906636-3908583 FORWARDmoderately similar to ( 446) HBP1B_WHEAT Transcription factor HBP-1b(c38) - Triticum aestivum (Wheat)moderately similar to ( 452) loc_os01g17260 12001.m08319 protein transcription factor HBP-1b, putative, expressed seq=cds; coord=8:…			0.713549
C2H2(Zn)-Dof
BinCode	BinName	id	type	description	ra1	ra2	ra3
27.3.8	RNA.regulation of transcription.C2C2(Zn) DOF zinc finger family	grmzm2g589696_t01	Transcript	weakly similar to ( 153) AT5G62940 | Symbols: | Dof-type zinc finger domain-containing protein | chr5:25257183-25258504 REVERSEweakly similar to ( 125) PBF_MAIZE Dof zinc finger protein PBF (Prolamin box-binding factor) - Zea mays (Maize)moderately similar to ( 297) loc_os02g47810 12002.m09815 protein dof domain, zinc finger family protein, expressed seq=cds; coord=4:160276889..160280031:-1; pare…	-0.945201
27.3.8	RNA.regulation of transcription.C2C2(Zn) DOF zinc finger family	grmzm2g327189_t01	Transcript	very weakly similar to (82.0) AT1G29160 | Symbols: | Dof-type zinc finger domain-containing protein | chr1:10183797-10184324 REVERSEweakly similar to ( 102) loc_os01g48290 12001.m11020 protein expressed protein seq=cds; coord=3:209838358..209839735:-1; parent_gene=GRMZM2G327189	-1.38539
27.3.8	RNA.regulation of transcription.C2C2(Zn) DOF zinc finger family	grmzm2g061292_t01	Transcript	weakly similar to ( 102) AT1G28310 | Symbols: | Dof-type zinc finger domain-containing protein | chr1:9912534-9913685 REVERSEweakly similar to ( 114) MNB1A_MAIZE Dof zinc finger protein MNB1A - Zea mays (Maize)weakly similar to ( 133) loc_os03g42200 12003.m09278 protein dof domain, zinc finger family protein, expressed seq=cds; coord=5:18156330..18157779:1; parent_gene=GRMZM2G061292	-1.0054
27.3.8	RNA.regulation of transcription.C2C2(Zn) DOF zinc finger family	grmzm2g449950_t01	Transcript	weakly similar to ( 122) AT5G60850 | Symbols: OBP4 | OBP4; DNA binding / transcription factor | chr5:24480578-24481501 FORWARDweakly similar to ( 110) PBF_MAIZE Dof zinc finger protein PBF (Prolamin box-binding factor) - Zea mays (Maize)weakly similar to ( 162) loc_os02g49440 12002.m09978 protein expressed protein seq=cds; coord=4:164175253..164176468:-1; parent_gene=GRMZM2G449950	-1.19594
27.3.8	RNA.regulation of transcription.C2C2(Zn) DOF zinc finger family	grmzm2g045678_t01	Transcript	very weakly similar to ( 100) AT3G21270 | Symbols: ADOF2 | ADOF2; DNA binding / transcription factor | chr3:7474934-7475548 FORWARDweakly similar to ( 110) MNB1A_MAIZE Dof zinc finger protein MNB1A - Zea mays (Maize)weakly similar to ( 120) loc_os12g39990 12012.m07783 protein dof zinc finger protein MNB1A, putative seq=cds; coord=1:254560004..254561310:1; parent_gene=GRMZM2G045678	-1.03742
27.3.8	RNA.regulation of transcription.C2C2(Zn) DOF zinc finger family	grmzm2g140694_t01	Transcript	weakly similar to ( 144) AT5G62940 | Symbols: | Dof-type zinc finger domain-containing protein | chr5:25257183-25258504 REVERSEweakly similar to ( 119) PBF_MAIZE Dof zinc finger protein PBF (Prolamin box-binding factor) - Zea mays (Maize)moderately similar to ( 360) loc_os02g47810 12002.m09815 protein dof domain, zinc finger family protein, expressed seq=cds; coord=5:201381499..201385596:-1; pare…	-1.06606
27.3.8	RNA.regulation of transcription.C2C2(Zn) DOF zinc finger family	grmzm2g378490_t01	Transcript	weakly similar to ( 108) AT2G28810 | Symbols: | Dof-type zinc finger domain-containing protein | chr2:12363681-12365080 FORWARDweakly similar to ( 107) PBF_MAIZE Dof zinc finger protein PBF (Prolamin box-binding factor) - Zea mays (Maize)weakly similar to ( 149) loc_os01g09720 12001.m07596 protein dof zinc finger protein PBF, putative seq=cds; coord=3:6299506..6300810:-1; parent_gene=GRMZM2G378490	-1.20426
27.3.8	RNA.regulation of transcription.C2C2(Zn) DOF zinc finger family	grmzm2g064655_t01	Transcript	weakly similar to ( 120) AT5G60200 | Symbols: | Dof-type zinc finger domain-containing protein | chr5:24241078-24241951 FORWARDweakly similar to ( 121) PBF_MAIZE Dof zinc finger protein PBF (Prolamin box-binding factor) - Zea mays (Maize)weakly similar to ( 142) loc_os07g32510 12007.m07514 protein expressed protein seq=cds; coord=2:202417739..202419644:1; parent_gene=GRMZM2G064655	-0.757651
27.3.8	RNA.regulation of transcription.C2C2(Zn) DOF zinc finger family	grmzm2g394941_t01	Transcript	weakly similar to ( 124) AT5G60850 | Symbols: OBP4 | OBP4; DNA binding / transcription factor | chr5:24480578-24481501 FORWARDweakly similar to ( 119) PBF_MAIZE Dof zinc finger protein PBF (Prolamin box-binding factor) - Zea mays (Maize)weakly similar to ( 151) loc_os02g49440 12002.m09978 protein expressed protein seq=cds; coord=5:204229037..204230736:1; parent_gene=GRMZM2G394941	-0.917599
27.3.8	RNA.regulation of transcription.C2C2(Zn) DOF zinc finger family	grmzm2g131897_t01	Transcript	very weakly similar to ( 100) AT3G21270 | Symbols: ADOF2 | ADOF2; DNA binding / transcription factor | chr3:7474934-7475548 FORWARDweakly similar to ( 115) MNB1A_MAIZE Dof zinc finger protein MNB1A - Zea mays (Maize)weakly similar to ( 127) loc_os12g39990 12012.m07783 protein dof zinc finger protein MNB1A, putative seq=cds; coord=1:164628494..164629568:1; parent_gene=GRMZM2G131897	-1.60575
27.3.8	RNA.regulation of transcription.C2C2(Zn) DOF zinc finger family	grmzm2g371058_t01	Transcript	weakly similar to ( 127) AT3G52440 | Symbols: | Dof-type zinc finger domain-containing protein | chr3:19435447-19436190 FORWARDweakly similar to ( 119) PBF_MAIZE Dof zinc finger protein PBF (Prolamin box-binding factor) - Zea mays (Maize)moderately similar to ( 254) loc_os05g36900 12005.m07871 protein dof domain, zinc finger family protein seq=cds; coord=6:149124354..149125788:1; parent_gene=GRMZ…	-1.05285
27.3.8	RNA.regulation of transcription.C2C2(Zn) DOF zinc finger family	grmzm2g394973_t01	Transcript	weakly similar to ( 102) AT2G34140 | Symbols: | Dof-type zinc finger domain-containing protein | chr2:14414188-14414700 REVERSEvery weakly similar to (83.6) MNB1A_MAIZE Dof zinc finger protein MNB1A - Zea mays (Maize)weakly similar to ( 106) loc_os01g55340 12001.m11693 protein expressed protein seq=cds; coord=3:195926190..195927293:1; parent_gene=GRMZM2G394973	-1.58157
27.3.8	RNA.regulation of transcription.C2C2(Zn) DOF zinc finger family	grmzm2g142718_t01	Transcript	very weakly similar to (94.0) AT5G66940 | Symbols: | Dof-type zinc finger domain-containing protein | chr5:26727989-26728666 REVERSEvery weakly similar to (90.1) PBF_MAIZE Dof zinc finger protein PBF (Prolamin box-binding factor) - Zea mays (Maize)weakly similar to ( 158) loc_os04g58190 12004.m35517 protein expressed protein seq=cds; coord=10:148408926..148410383:-1; parent_gene=GRMZM2G142718	-1.17817
27.3.8	RNA.regulation of transcription.C2C2(Zn) DOF zinc finger family	grmzm2g082490_t01	Transcript	weakly similar to ( 103) AT2G34140 | Symbols: | Dof-type zinc finger domain-containing protein | chr2:14414188-14414700 REVERSEvery weakly similar to (83.6) MNB1A_MAIZE Dof zinc finger protein MNB1A - Zea mays (Maize)weakly similar to ( 151) loc_os01g55340 12001.m11693 protein expressed protein seq=cds; coord=8:173719258..173720379:1; parent_gene=GRMZM2G082490	-1.58199
27.3.8	RNA.regulation of transcription.C2C2(Zn) DOF zinc finger family	grmzm2g114998_t01	Transcript	weakly similar to ( 111) AT3G61850 | Symbols: DAG1 | DAG1 (dof affecting germination 1); DNA binding / transcription factor | chr3:22895495-22897150 FORWARDvery weakly similar to (97.4) PBF_MAIZE Dof zinc finger protein PBF (Prolamin box-binding factor) - Zea mays (Maize)moderately similar to ( 289) loc_os02g45200 12002.m33817 protein expressed protein seq=cds; coord=4:155008618..155010960:-1; pa…	-0.798171
27.3.8	RNA.regulation of transcription.C2C2(Zn) DOF zinc finger family	grmzm2g123900_t01	Transcript	weakly similar to ( 141) AT5G02460 | Symbols: | Dof-type zinc finger domain-containing protein | chr5:539549-541058 REVERSEweakly similar to ( 117) PBF_MAIZE Dof zinc finger protein PBF (Prolamin box-binding factor) - Zea mays (Maize)weakly similar to ( 162) loc_os12g38200 12012.m07606 protein expressed protein seq=cds; coord=1:154314059..154316323:1; parent_gene=GRMZM2G123900	-0.871867
27.3.8	RNA.regulation of transcription.C2C2(Zn) DOF zinc finger family	grmzm2g176063_t01	Transcript	weakly similar to ( 138) AT5G02460 | Symbols: | Dof-type zinc finger domain-containing protein | chr5:539549-541058 REVERSEweakly similar to ( 116) PBF_MAIZE Dof zinc finger protein PBF (Prolamin box-binding factor) - Zea mays (Maize)moderately similar to ( 218) loc_os12g38200 12012.m07606 protein expressed protein seq=cds; coord=3:126308453..126310838:-1; parent_gene=GRMZM2G176063	-0.813276
27.3.8	RNA.regulation of transcription.C2C2(Zn) DOF zinc finger family	grmzm2g010290_t01	Transcript	weakly similar to ( 136) AT4G24060 | Symbols: | Dof-type zinc finger domain-containing protein | chr4:12503970-12505417 FORWARDweakly similar to ( 123) PBF_MAIZE Dof zinc finger protein PBF (Prolamin box-binding factor) - Zea mays (Maize)moderately similar to ( 281) loc_os04g47990 12004.m35186 protein dof zinc finger protein, putative, expressed seq=cds; coord=10:137204858..137206460:1; parent_ge…	-0.824985
27.3.8	RNA.regulation of transcription.C2C2(Zn) DOF zinc finger family	grmzm5g865212_t01	Transcript	weakly similar to ( 138) AT5G02460 | Symbols: | Dof-type zinc finger domain-containing protein | chr5:539549-541058 REVERSEweakly similar to ( 116) PBF_MAIZE Dof zinc finger protein PBF (Prolamin box-binding factor) - Zea mays (Maize)weakly similar to ( 191) loc_os12g38200 12012.m07606 protein expressed protein seq=cds; coord=3:126308634..126310830:1; parent_gene=GRMZM5G865212		-2.10563	-1.49017
27.3.8	RNA.regulation of transcription.C2C2(Zn) DOF zinc finger family	grmzm2g009406_t01	Transcript	weakly similar to ( 107) AT3G50410 | Symbols: OBP1 | OBP1 (OBF BINDING PROTEIN 1); DNA binding / protein binding / transcription factor | chr3:18709872-18710633 FORWARDweakly similar to ( 144) MNB1A_MAIZE Dof zinc finger protein MNB1A - Zea mays (Maize)moderately similar to ( 215) loc_os09g29960 12009.m06147 protein dof zinc finger protein MNB1A, putative, expressed seq=cds; coord=2:188526058..18…			1.57042
27.3.8	RNA.regulation of transcription.C2C2(Zn) DOF zinc finger family	grmzm2g089850_t01	Transcript	very weakly similar to (96.3) AT3G21270 | Symbols: ADOF2 | ADOF2; DNA binding / transcription factor | chr3:7474934-7475548 FORWARDweakly similar to ( 127) MNB1A_MAIZE Dof zinc finger protein MNB1A - Zea mays (Maize)weakly similar to ( 140) loc_os09g29960 12009.m06147 protein dof zinc finger protein MNB1A, putative, expressed seq=cds; coord=7:130360893..130362159:-1; parent_gene=GRMZM2G089850			1.0276
C2H2(Zn)-GATA
BinCode	BinName	id	type	description	ra1	ra2	ra3
27.3.9	RNA.regulation of transcription.C2C2(Zn) GATA transcription factor family	grmzm2g118214_t01	Transcript	weakly similar to ( 104) AT5G66320 | Symbols: | zinc finger (GATA type) family protein | chr5:26496208-26497309 REVERSEweakly similar to ( 122) loc_os12g07120 12012.m04702 protein basic proline-rich protein, putative, expressed seq=cds; coord=10:9404998..9406937:1; parent_gene=GRMZM2G118214	-1.09769
27.3.9	RNA.regulation of transcription.C2C2(Zn) GATA transcription factor family	grmzm2g123909_t01	Transcript	weakly similar to ( 198) loc_os01g47360 12001.m10931 protein GATA zinc finger family protein seq=cds; coord=3:211681580..211682565:-1; parent_gene=GRMZM2G123909	-1.5637
27.3.9	RNA.regulation of transcription.C2C2(Zn) GATA transcription factor family	grmzm2g404973_t01	Transcript	weakly similar to ( 140) AT5G66320 | Symbols: | zinc finger (GATA type) family protein | chr5:26496208-26497309 REVERSEmoderately similar to ( 204) loc_os04g45650 12004.m35556 protein expressed protein seq=cds; coord=2:22068797..22071156:-1; parent_gene=GRMZM2G404973	-0.761996
27.3.9	RNA.regulation of transcription.C2C2(Zn) GATA transcription factor family	grmzm2g135381_t01	Transcript	weakly similar to ( 197) AT5G25830 | Symbols: | zinc finger (GATA type) family protein | chr5:9004398-9005502 REVERSEmoderately similar to ( 299) loc_os05g44400 12005.m08566 protein GATA transcription factor 13, putative, expressed seq=cds; coord=8:124357134..124359274:1; parent_gene=GRMZM2G135381	-1.92898
27.3.9	RNA.regulation of transcription.C2C2(Zn) GATA transcription factor family	grmzm2g114775_t01	Transcript	weakly similar to ( 156) loc_os03g61570 12003.m11038 protein expressed protein seq=cds; coord=1:295768837..295770331:1; parent_gene=GRMZM2G114775	-0.771436
27.3.9	RNA.regulation of transcription.C2C2(Zn) GATA transcription factor family	grmzm2g101058_t01	Transcript	weakly similar to ( 147) AT2G45050 | Symbols: | zinc finger (GATA type) family protein | chr2:18582958-18583845 FORWARDweakly similar to ( 181) loc_os10g40810 12010.m06851 protein GATA transcription factor 9, putative, expressed seq=cds; coord=9:115956357..115958166:1; parent_gene=GRMZM2G101058	-1.70076
27.3.9	RNA.regulation of transcription.C2C2(Zn) GATA transcription factor family	grmzm2g113098_t01	Transcript	weakly similar to ( 150) AT2G45050 | Symbols: | zinc finger (GATA type) family protein | chr2:18582958-18583845 FORWARDmoderately similar to ( 362) loc_os10g40810 12010.m06851 protein GATA transcription factor 9, putative, expressed seq=cds; coord=1:90953352..90955047:1; parent_gene=GRMZM2G113098	-0.965263
27.3.9	RNA.regulation of transcription.C2C2(Zn) GATA transcription factor family	grmzm2g532534_t01	Transcript	weakly similar to ( 115) AT2G45050 | Symbols: | zinc finger (GATA type) family protein | chr2:18582958-18583845 FORWARDweakly similar to ( 153) loc_os03g05160 12003.m06040 protein GATA zinc finger family protein, expressed seq=cds; coord=9:152266750..152271833:1; parent_gene=GRMZM2G532534	-1.47206
27.3.9	RNA.regulation of transcription.C2C2(Zn) GATA transcription factor family	grmzm2g397616_t01	Transcript	very weakly similar to (89.0) AT3G50870 | Symbols: MNP | MNP (MONOPOLE); transcription factor | chr3:18911112-18912369 FORWARDweakly similar to ( 119) loc_os05g50270 12005.m09096 protein GATA transcription factor 19, putative, expressed seq=cds; coord=8:73894507..73895588:-1; parent_gene=GRMZM2G397616	-1.56877
27.3.9	RNA.regulation of transcription.C2C2(Zn) GATA transcription factor family	grmzm2g325850_t01	Transcript	weakly similar to ( 116) loc_os05g50270 12005.m09096 protein GATA transcription factor 19, putative, expressed seq=cds; coord=6:166077055..166078403:-1; parent_gene=GRMZM2G325850	-1.33884
27.3.9	RNA.regulation of transcription.C2C2(Zn) GATA transcription factor family	grmzm2g054615_t01	Transcript	weakly similar to ( 140) AT5G66320 | Symbols: | zinc finger (GATA type) family protein | chr5:26496208-26497309 REVERSEmoderately similar to ( 256) loc_os02g43150 12002.m100295 protein GATA zinc finger family protein, expressed seq=cds; coord=10:133367444..133369576:1; parent_gene=GRMZM2G054615	-0.832557
27.3.9	RNA.regulation of transcription.C2C2(Zn) GATA transcription factor family	grmzm2g067171_t01	Transcript	weakly similar to ( 112) AT5G25830 | Symbols: | zinc finger (GATA type) family protein | chr5:9004398-9005502 REVERSEweakly similar to ( 111) loc_os05g44400 12005.m08566 protein GATA transcription factor 13, putative, expressed seq=cds; coord=3:141442976..141444844:1; parent_gene=GRMZM2G067171	-0.771174
27.3.9	RNA.regulation of transcription.C2C2(Zn) GATA transcription factor family	grmzm2g163200_t01	Transcript	weakly similar to ( 132) AT3G54810 | Symbols: BME3-ZF, BME3 | zinc finger (GATA type) family protein | chr3:20296957-20298236 FORWARDmoderately similar to ( 202) loc_os02g56250 12002.m10648 protein GATA zinc finger family protein, expressed seq=cds; coord=5:214526228..214532172:1; parent_gene=GRMZM2G163200			0.615224
C2H2(Zn)-YABBY
BinCode	BinName	id	type	description	ra1	ra2	ra3
27.3.10	RNA.regulation of transcription.C2C2(Zn) YABBY family	grmzm2g046829_t01	Transcript	weakly similar to ( 122) AT4G00180 | Symbols: YAB3 | YAB3 (YABBY3); protein binding / transcription factor | chr4:72804-74888 REVERSEweakly similar to ( 103) YAB1_ORYSA Protein YABBY (OsYAB1) (Filamentous flower protein 1) - Oryza sativa (Rice)weakly similar to ( 115) loc_os02g42950 12002.m33795 protein yabby15 protein, putative, expressed seq=cds; coord=7:159462826..159464816:1; parent_gene=GRMZ…	-1.67287
27.3.10	RNA.regulation of transcription.C2C2(Zn) YABBY family	grmzm2g005353_t01	Transcript	weakly similar to ( 131) AT2G45190 | Symbols: AFO, FIL, YAB1 | AFO (ABNORMAL FLORAL ORGANS); protein binding / transcription factor/ transcription regulator | chr2:18628450-18630552 REVERSEvery weakly similar to (98.6) YAB1_ORYSA Protein YABBY (OsYAB1) (Filamentous flower protein 1) - Oryza sativa (Rice)moderately similar to ( 251) loc_os04g45330 12004.m09486 protein yabby14 protein, putative, ex…			2.29762
27.3.10	RNA.regulation of transcription.C2C2(Zn) YABBY family	grmzm2g102218_t01	Transcript	weakly similar to ( 172) AT1G69180 | Symbols: CRC | CRC (CRABS CLAW); transcription factor | chr1:26007734-26008940 REVERSEmoderately similar to ( 330) YABDL_ORYSA Protein DROOPING LEAF - Oryza sativa (Rice)moderately similar to ( 330) loc_os03g11600 12003.m06612 protein protein DROOPING LEAF, putative, expressed seq=cds; coord=9:146693340..146698631:-1; parent_gene=GRMZM2G102218			1.79895
C2H2(Zn)
BinCode	BinName	id	type	description	ra1	ra2	ra3
27.3.11	RNA.regulation of transcription.C2H2 zinc finger family	grmzm2g361210_t01	Transcript	weakly similar to ( 131) loc_os03g60570 12003.m10946 protein zinc finger DNA-binding protein, putative, expressed seq=cds; coord=1:293158302..293159120:1; parent_gene=GRMZM2G361210	1.46005	1.31864	3.44699
27.3.11	RNA.regulation of transcription.C2H2 zinc finger family	grmzm2g104516_t01	Transcript	weakly similar to ( 104) loc_os08g44190 12008.m08392 protein zinc finger protein 2, putative, expressed seq=cds; coord=1:205832080..205832623:1; parent_gene=GRMZM2G104516	-1.19959
27.3.11	RNA.regulation of transcription.C2H2 zinc finger family	grmzm2g157197_t01	Transcript	weakly similar to ( 155) loc_os03g13600 12003.m35118 protein zinc finger protein 7, putative, expressed seq=cds; coord=1:32153437..32157170:-1; parent_gene=GRMZM2G157197	-1.51097
27.3.11	RNA.regulation of transcription.C2H2 zinc finger family	grmzm2g139160_t01	Transcript	moderately similar to ( 322) AT5G54630 | Symbols: | zinc finger protein-related | chr5:22192607-22194260 REVERSEhighly similar to ( 574) loc_os01g57650 12001.m11914 protein nucleic acid binding protein, putative, expressed seq=cds; coord=8:171805293..171810996:1; parent_gene=GRMZM2G139160	-0.888612
27.3.11	RNA.regulation of transcription.C2H2 zinc finger family	grmzm2g171073_t01	Transcript	very weakly similar to (84.3) AT5G66730 | Symbols: | zinc finger (C2H2 type) family protein | chr5:26641914-26643883 REVERSEmoderately similar to ( 233) loc_os03g10140 12003.m06467 protein nucleic acid binding protein, putative, expressed seq=cds; coord=1:23563517..23567058:-1; parent_gene=GRMZM2G171073	-0.924896
27.3.11	RNA.regulation of transcription.C2H2 zinc finger family	grmzm5g888196_t01	Transcript	weakly similar to ( 110) loc_os03g57240 12003.m10643 protein expressed protein seq=cds; coord=1:285527654..285529090:-1; parent_gene=GRMZM5G888196	-1.52103
27.3.11	RNA.regulation of transcription.C2H2 zinc finger family	grmzm2g357688_t01	Transcript	very weakly similar to (87.8) loc_os09g38610 12009.m06802 protein zinc finger protein 2, putative, expressed seq=cds; coord=7:145717491..145718538:1; parent_gene=GRMZM2G357688	-1.28612		1.70444
27.3.11	RNA.regulation of transcription.C2H2 zinc finger family	grmzm2g465595_t01	Transcript	moderately similar to ( 263) AT2G01940 | Symbols: SGR5, ATIDD15 | nucleic acid binding / transcription factor/ zinc ion binding | chr2:432652-434917 FORWARDmoderately similar to ( 290) loc_os03g13400 12003.m06785 protein zinc finger, C2H2 type family protein, expressed seq=cds; coord=1:31764158..31768066:-1; parent_gene=GRMZM2G465595	-1.27098
27.3.11	RNA.regulation of transcription.C2H2 zinc finger family	grmzm2g426125_t01	Transcript	weakly similar to ( 151) loc_os12g39220 12012.m07707 protein zinc finger protein 7, putative, expressed seq=cds; coord=1:161682242..161682850:1; parent_gene=GRMZM2G426125	-1.18676
27.3.11	RNA.regulation of transcription.C2H2 zinc finger family	grmzm2g158194_t01	Transcript	moderately similar to ( 252) AT3G14740 | Symbols: | PHD finger family protein | chr3:4952185-4953306 REVERSEmoderately similar to ( 476) loc_os01g08820 12001.m07507 protein PHD-finger family protein, expressed seq=cds; coord=3:9042243..9044511:1; parent_gene=GRMZM2G158194	-0.73695
27.3.11	RNA.regulation of transcription.C2H2 zinc finger family	grmzm2g105224_t01	Transcript	moderately similar to ( 386) AT5G54630 | Symbols: | zinc finger protein-related | chr5:22192607-22194260 REVERSEhighly similar to ( 570) loc_os01g57650 12001.m11914 protein nucleic acid binding protein, putative, expressed seq=cds; coord=3:190062951..190065367:1; parent_gene=GRMZM2G105224	-0.656033
27.3.11	RNA.regulation of transcription.C2H2 zinc finger family	grmzm2g071101_t01	Transcript	moderately similar to ( 334) AT3G57670 | Symbols: NTT | NTT (NO TRANSMITTING TRACT); nucleic acid binding / transcription factor/ zinc ion binding | chr3:21370936-21373121 FORWARDmoderately similar to ( 425) loc_os08g39390 12008.m07920 protein zinc finger protein, putative, expressed seq=cds; coord=4:198996474..198999663:1; parent_gene=GRMZM2G071101	-0.836723		0.741392
27.3.11	RNA.regulation of transcription.C2H2 zinc finger family	grmzm2g061545_t01	Transcript	moderately similar to ( 264) AT3G57670 | Symbols: NTT | NTT (NO TRANSMITTING TRACT); nucleic acid binding / transcription factor/ zinc ion binding | chr3:21370936-21373121 FORWARDmoderately similar to ( 280) loc_os06g40960 12006.m08631 protein zinc finger protein, putative, expressed seq=cds; coord=6:98814544..98816293:-1; parent_gene=GRMZM2G061545	-0.860479
27.3.11	RNA.regulation of transcription.C2H2 zinc finger family	grmzm2g141031_t01	Transcript	moderately similar to ( 291) AT1G68130 | Symbols: AtIDD14 | AtIDD14 (Arabidopsis thaliana Indeterminate(ID)-Domain 14); nucleic acid binding / transcription factor/ zinc ion binding | chr1:25532843-25534317 FORWARDmoderately similar to ( 319) loc_os09g27650 12009.m05916 protein zinc finger, C2H2 type family protein, expressed seq=cds; coord=7:124146510..124150019:1; parent_gene=GRMZM2G141031	-1.36799		-0.890146
27.3.11	RNA.regulation of transcription.C2H2 zinc finger family	grmzm2g077752_t01	Transcript	weakly similar to ( 157) AT5G12330 | Symbols: LRP1 | LRP1 (LATERAL ROOT PRIMORDIUM 1); protein homodimerization | chr5:3987677-3989074 REVERSEmoderately similar to ( 307) loc_os01g72490 12001.m97574 protein LRP1, putative, expressed seq=cds; coord=8:157746608..157748480:1; parent_gene=GRMZM2G077752	-0.829794
27.3.11	RNA.regulation of transcription.C2H2 zinc finger family	grmzm2g123094_t01	Transcript	very weakly similar to (87.0) loc_os08g36390 12008.m07628 protein zinc finger, C2H2 type family protein, expressed seq=cds; coord=1:198473709..198475340:1; parent_gene=GRMZM2G123094	-1.09442
27.3.11	RNA.regulation of transcription.C2H2 zinc finger family	grmzm2g165355_t01	Transcript	weakly similar to ( 137) loc_os03g13600 12003.m35118 protein zinc finger protein 7, putative, expressed seq=cds; coord=9:143861140..143863395:1; parent_gene=GRMZM2G165355	-1.05315
27.3.11	RNA.regulation of transcription.C2H2 zinc finger family	grmzm2g108798_t01	Transcript	weakly similar to ( 172) AT3G51060 | Symbols: STY1, SRS1 | STY1 (STYLISH 1); protein heterodimerization/ transcription factor | chr3:18964606-18966130 FORWARDmoderately similar to ( 328) loc_os06g49830 12006.m09507 protein SHI, putative, expressed seq=cds; coord=6:85205164..85207862:-1; parent_gene=GRMZM2G108798	-0.960651
27.3.11	RNA.regulation of transcription.C2H2 zinc finger family	grmzm2g074032_t01	Transcript	moderately similar to ( 265) AT2G01940 | Symbols: SGR5, ATIDD15 | nucleic acid binding / transcription factor/ zinc ion binding | chr2:432652-434917 FORWARDmoderately similar to ( 338) loc_os03g13400 12003.m06785 protein zinc finger, C2H2 type family protein, expressed seq=cds; coord=9:144035603..144039324:1; parent_gene=GRMZM2G074032	-1.21874
27.3.11	RNA.regulation of transcription.C2H2 zinc finger family	grmzm2g013960_t01	Transcript	very weakly similar to (91.7) loc_os12g42250 12012.m08004 protein expressed protein seq=cds; coord=1:174365506..174366371:-1; parent_gene=GRMZM2G013960	-1.38914
27.3.11	RNA.regulation of transcription.C2H2 zinc finger family	grmzm2g134759_t01	Transcript	weakly similar to ( 135) AT3G02790 | Symbols: | zinc finger (C2H2 type) family protein | chr3:604926-605243 FORWARDweakly similar to ( 167) loc_os06g49490 12006.m09473 protein expressed protein seq=cds; coord=6:85886996..85888733:-1; parent_gene=GRMZM2G134759	-1.00151
27.3.11	RNA.regulation of transcription.C2H2 zinc finger family	grmzm2g135783_t01	Transcript	very weakly similar to (85.5) AT2G21400 | Symbols: SRS3 | SRS3 (SHI-RELATED SEQUENCE3) | chr2:9158390-9159541 FORWARDweakly similar to ( 166) loc_os09g36160 12009.m06565 protein SHI, putative, expressed seq=cds; coord=7:142902337..142904212:-1; parent_gene=GRMZM2G135783	-0.773323
27.3.11	RNA.regulation of transcription.C2H2 zinc finger family	grmzm2g445684_t01	Transcript	moderately similar to ( 333) AT3G57670 | Symbols: NTT | NTT (NO TRANSMITTING TRACT); nucleic acid binding / transcription factor/ zinc ion binding | chr3:21370936-21373121 FORWARDmoderately similar to ( 434) loc_os08g39390 12008.m07920 protein zinc finger protein, putative, expressed seq=cds; coord=1:187269130..187271929:1; parent_gene=GRMZM2G445684	-1.21568
27.3.11	RNA.regulation of transcription.C2H2 zinc finger family	grmzm2g080295_t01	Transcript	weakly similar to ( 142) AT3G51060 | Symbols: STY1, SRS1 | STY1 (STYLISH 1); protein heterodimerization/ transcription factor | chr3:18964606-18966130 FORWARDmoderately similar to ( 297) loc_os09g36160 12009.m06565 protein SHI, putative, expressed seq=cds; coord=2:195649882..195651315:-1; parent_gene=GRMZM2G080295	-1.093		0.697414
27.3.11	RNA.regulation of transcription.C2H2 zinc finger family	grmzm2g177693_t01	Transcript	moderately similar to ( 310) AT1G55110 | Symbols: AtIDD7 | AtIDD7 (Arabidopsis thaliana Indeterminate(ID)-Domain 7); nucleic acid binding / transcription factor/ zinc ion binding | chr1:20560406-20562625 REVERSEmoderately similar to ( 330) loc_os01g09850 12001.m42906 protein zinc finger, C2H2-type, putative, expressed seq=cds; coord=3:219574940..219579226:1; parent_gene=GRMZM2G177693	-0.660473	-0.727534	-0.543388
27.3.11	RNA.regulation of transcription.C2H2 zinc finger family	grmzm2g450459_t01	Transcript	weakly similar to ( 135) AT5G12330 | Symbols: LRP1 | LRP1 (LATERAL ROOT PRIMORDIUM 1); protein homodimerization | chr5:3987677-3989074 REVERSEmoderately similar to ( 202) loc_os05g32070 12005.m07440 protein LRP1, putative, expressed seq=cds; coord=6:143026281..143028927:1; parent_gene=GRMZM2G450459	-0.911267
27.3.11	RNA.regulation of transcription.C2H2 zinc finger family	grmzm2g158141_t01	Transcript	moderately similar to ( 216) AT1G75710 | Symbols: | zinc finger (C2H2 type) family protein | chr1:28428806-28431128 FORWARDmoderately similar to ( 424) loc_os04g02510 12004.m05563 protein nucleic acid binding protein, putative, expressed seq=cds; coord=10:91956237..91959657:1; parent_gene=GRMZM2G158141	-0.931526
27.3.11	RNA.regulation of transcription.C2H2 zinc finger family	grmzm2g385945_t01	Transcript	weakly similar to ( 146) AT3G02790 | Symbols: | zinc finger (C2H2 type) family protein | chr3:604926-605243 FORWARDweakly similar to ( 182) loc_os06g49490 12006.m09473 protein expressed protein seq=cds; coord=5:59271324..59272165:1; parent_gene=GRMZM2G385945	-1.36737
27.3.11	RNA.regulation of transcription.C2H2 zinc finger family	grmzm2g170520_t01	Transcript	weakly similar to ( 133) AT1G02030 | Symbols: | zinc finger (C2H2 type) family protein | chr1:355385-356188 REVERSEmoderately similar to ( 322) loc_os04g46680 12004.m09616 protein cys2/His2 zinc-finger transcription factor, putative, expressed seq=cds; coord=2:19359170..19360563:-1; parent_gene=GRMZM2G170520	-0.8918
27.3.11	RNA.regulation of transcription.C2H2 zinc finger family	grmzm2g084014_t01	Transcript	moderately similar to ( 346) AT3G57670 | Symbols: NTT | NTT (NO TRANSMITTING TRACT); nucleic acid binding / transcription factor/ zinc ion binding | chr3:21370936-21373121 FORWARDmoderately similar to ( 369) loc_os08g39390 12008.m07920 protein zinc finger protein, putative, expressed seq=cds; coord=7:132589996..132595367:1; parent_gene=GRMZM2G084014	-0.897592
27.3.11	RNA.regulation of transcription.C2H2 zinc finger family	grmzm2g128212_t01	Transcript	very weakly similar to (81.3) AT2G41940 | Symbols: ZFP8 | ZFP8 (ZINC FINGER PROTEIN 8); nucleic acid binding / transcription factor/ zinc ion binding | chr2:17507556-17508329 FORWARDweakly similar to ( 182) loc_os09g27320 12009.m05884 protein zinc finger protein, putative seq=cds; coord=7:122716983..122718164:1; parent_gene=GRMZM2G128212	-1.03613
27.3.11	RNA.regulation of transcription.C2H2 zinc finger family	grmzm2g093305_t01	Transcript	weakly similar to ( 180) AT2G29660 | Symbols: | zinc finger (C2H2 type) family protein | chr2:12679346-12680467 FORWARDmoderately similar to ( 397) loc_os03g15790 12003.m07016 protein nucleic acid binding protein, putative, expressed seq=cds; coord=1:38186968..38189062:-1; parent_gene=GRMZM2G093305	-1.16416
27.3.11	RNA.regulation of transcription.C2H2 zinc finger family	ac205122.4_fgt003	Transcript	weakly similar to ( 164) AT1G48590 | Symbols: | C2 domain-containing protein | chr1:17962979-17964274 FORWARDmoderately similar to ( 241) loc_os07g01780 12007.m28916 protein GTPase activating protein, putative, expressed seq=cds; coord=7:2133070..2135323:1; parent_gene=AC205122.4_FG003	-1.26079		1.44007
27.3.11	RNA.regulation of transcription.C2H2 zinc finger family	grmzm2g175661_t01	Transcript	nearly identical (1442) AT3G18290 | Symbols: EMB2454 | EMB2454 (embryo defective 2454); protein binding / zinc ion binding | chr3:6274308-6280174 FORWARDnearly identical (1914) loc_os01g49470 12001.m11133 protein CHY zinc finger family protein, expressed seq=cds; coord=8:151728613..151742221:-1; parent_gene=GRMZM2G175661		1.14826
27.3.11	RNA.regulation of transcription.C2H2 zinc finger family	grmzm2g161728_t01	Transcript	moderately similar to ( 405) AT4G21160 | Symbols: ZAC | ZAC; ARF GTPase activator/ phospholipid binding | chr4:11284694-11286532 FORWARDhighly similar to ( 563) loc_os02g49070 12002.m09941 protein ZAC, putative, expressed seq=cds; coord=5:204066655..204071094:-1; parent_gene=GRMZM2G161728		0.778959	0.748795
27.3.11	RNA.regulation of transcription.C2H2 zinc finger family	grmzm5g817439_t01	Transcript	highly similar to ( 619) AT2G27100 | Symbols: SE | SE (SERRATE); DNA binding / transcription factor | chr2:11572587-11576357 FORWARDhighly similar to ( 890) loc_os06g48530 12006.m09379 protein expressed protein seq=cds; coord=5:55786210..55794362:-1; parent_gene=GRMZM5G817439		1.21749	1.15711
27.3.11	RNA.regulation of transcription.C2H2 zinc finger family	grmzm2g400714_t01	Transcript	weakly similar to ( 135) ZFP1_WHEAT Zinc-finger protein 1 (WZF1) - Triticum aestivum (Wheat)moderately similar to ( 221) loc_os03g55540 12003.m10467 protein zinc-finger protein 1, putative, expressed seq=cds; coord=1:279912701..279914465:-1; parent_gene=GRMZM2G400714		1.90818	3.04866
27.3.11	RNA.regulation of transcription.C2H2 zinc finger family	grmzm2g172427_t01	Transcript	highly similar to ( 929) AT2G23740 | Symbols: | nucleic acid binding / transcription factor/ zinc ion binding | chr2:10098213-10103229 FORWARDhighly similar to ( 811) loc_os02g47900 12002.m09824 protein SET domain protein SDG117, putative, expressed seq=cds; coord=4:160924313..160939504:1; parent_gene=GRMZM2G172427		1.07534
27.3.11	RNA.regulation of transcription.C2H2 zinc finger family	grmzm2g132780_t01	Transcript	moderately similar to ( 345) AT2G27100 | Symbols: SE | SE (SERRATE); DNA binding / transcription factor | chr2:11572587-11576357 FORWARDhighly similar to ( 504) loc_os08g40560 12008.m26744 protein expressed protein seq=cds; coord=1:191500385..191513742:1; parent_gene=GRMZM2G132780		0.836505	0.918935
27.3.11	RNA.regulation of transcription.C2H2 zinc finger family	grmzm2g027333_t01	Transcript	moderately similar to ( 300) AT1G55110 | Symbols: AtIDD7 | AtIDD7 (Arabidopsis thaliana Indeterminate(ID)-Domain 7); nucleic acid binding / transcription factor/ zinc ion binding | chr1:20560406-20562625 REVERSEmoderately similar to ( 411) loc_os01g39110 12001.m10191 protein zinc finger protein, putative, expressed seq=cds; coord=8:139342590..139346470:1; parent_gene=GRMZM2G027333			-0.63888
27.3.11	RNA.regulation of transcription.C2H2 zinc finger family	grmzm2g180699_t01	Transcript	weakly similar to ( 183) AT1G70810 | Symbols: | C2 domain-containing protein | chr1:26704207-26705091 FORWARDmoderately similar to ( 263) loc_os02g22130 12002.m07451 protein GTPase activating protein, putative, expressed seq=cds; coord=3:217630822..217633671:-1; parent_gene=GRMZM2G180699			0.894592
27.3.11	RNA.regulation of transcription.C2H2 zinc finger family	grmzm2g156099_t01	Transcript	highly similar to ( 617) AT2G27100 | Symbols: SE | SE (SERRATE); DNA binding / transcription factor | chr2:11572587-11576357 FORWARDhighly similar to ( 879) loc_os06g48530 12006.m09379 protein expressed protein seq=cds; coord=6:87790147..87797085:1; parent_gene=GRMZM2G156099			0.665528
27.3.11	RNA.regulation of transcription.C2H2 zinc finger family	grmzm2g002805_t01	Transcript	weakly similar to ( 129) loc_os03g60560 12003.m10945 protein ZFP16-2, putative, expressed seq=cds; coord=5:2378330..2379629:-1; parent_gene=GRMZM2G002805			1.42559
27.3.11	RNA.regulation of transcription.C2H2 zinc finger family	grmzm2g179677_t01	Transcript	moderately similar to ( 337) AT2G02070 | Symbols: AtIDD5 | AtIDD5 (Arabidopsis thaliana Indeterminate(ID)-Domain 5); nucleic acid binding / transcription factor/ zinc ion binding | chr2:505523-509154 FORWARDhighly similar to ( 571) loc_os08g44050 12008.m26786 protein INDETERMINATE-related protein 1, putative, expressed seq=cds; coord=1:206117307..206124458:1; parent_gene=GRMZM2G179677			-0.540026
27.3.11	RNA.regulation of transcription.C2H2 zinc finger family	grmzm2g126946_t01	Transcript	moderately similar to ( 409) AT4G21160 | Symbols: ZAC | ZAC; ARF GTPase activator/ phospholipid binding | chr4:11284694-11286532 FORWARDhighly similar to ( 569) loc_os02g49070 12002.m09941 protein ZAC, putative, expressed seq=cds; coord=4:163193909..163198280:1; parent_gene=GRMZM2G126946			0.729099
27.3.11	RNA.regulation of transcription.C2H2 zinc finger family	grmzm2g050939_t01	Transcript	moderately similar to ( 242) AT1G72050 | Symbols: TFIIIA | TFIIIA (TRANSCRIPTION FACTOR IIIA); nucleic acid binding / zinc ion binding | chr1:27115808-27117228 FORWARDmoderately similar to ( 371) loc_os05g03020 12005.m04836 protein transcription factor IIIA, putative, expressed seq=cds; coord=6:29282248..29286063:-1; parent_gene=GRMZM2G050939			0.572371
27.3.11	RNA.regulation of transcription.C2H2 zinc finger family	grmzm2g136494_t01	Transcript	moderately similar to ( 268) AT1G75710 | Symbols: | zinc finger (C2H2 type) family protein | chr1:28428806-28431128 FORWARDmoderately similar to ( 345) loc_os04g59380 12004.m10814 protein nucleic acid binding protein, putative, expressed seq=cds; coord=10:149091789..149093805:-1; parent_gene=GRMZM2G136494			-0.733397
27.3.11	RNA.regulation of transcription.C2H2 zinc finger family	grmzm2g061626_t01	Transcript	weakly similar to ( 152) loc_os03g60560 12003.m10945 protein ZFP16-2, putative, expressed seq=cds; coord=1:293154769..293155800:1; parent_gene=GRMZM2G061626			2.16346
27.3.11	RNA.regulation of transcription.C2H2 zinc finger family	grmzm2g120563_t01	Transcript	weakly similar to ( 144) AT1G70790 | Symbols: | C2 domain-containing protein | chr1:26700724-26702127 FORWARDweakly similar to ( 197) loc_os07g01770 12007.m04656 protein GTPase activating protein, putative, expressed seq=cds; coord=7:1309815..1318383:-1; parent_gene=GRMZM2G120563			-0.430889
27.3.11	RNA.regulation of transcription.C2H2 zinc finger family	grmzm2g035103_t01	Transcript	very weakly similar to (83.6) AT1G27730 | Symbols: STZ, ZAT10 | STZ (salt tolerance zinc finger); nucleic acid binding / transcription factor/ transcription repressor/ zinc ion binding | chr1:9648302-9648985 REVERSEweakly similar to ( 145) ZFP1_WHEAT Zinc-finger protein 1 (WZF1) - Triticum aestivum (Wheat)weakly similar to ( 143) loc_os03g55540 12003.m10467 protein zinc-finger protein 1, putative…			1.56779
27.3.11	RNA.regulation of transcription.C2H2 zinc finger family	grmzm2g129428_t01	Transcript	moderately similar to ( 433) AT1G34370 | Symbols: STOP1 | STOP1 (sensitive to proton rhizotoxicity 1); nucleic acid binding / transcription factor/ zinc ion binding | chr1:12551449-12552501 FORWARDhighly similar to ( 763) loc_os01g65080 12001.m150442 protein nucleic acid binding protein, putative, expressed seq=cds; coord=3:174461511..174465217:-1; parent_gene=GRMZM2G129428			0.771025
C3H(Zn)
BinCode	BinName	id	type	description	ra1	ra2	ra3
27.3.12	RNA.regulation of transcription.C3H zinc finger family	grmzm2g117007_t01	Transcript	moderately similar to ( 256) AT3G55980 | Symbols: SZF1, ATSZF1 | SZF1 (SALT-INDUCIBLE ZINC FINGER 1); transcription factor | chr3:20776857-20778599 FORWARDhighly similar to ( 516) loc_os05g03760 12005.m27532 protein zinc finger transcription factor-like protein, putative, expressed seq=cds; coord=8:131041707..131043172:-1; parent_gene=GRMZM2G117007	0.778221	0.863998	1.53278
27.3.12	RNA.regulation of transcription.C3H zinc finger family	grmzm5g801627_t01	Transcript	moderately similar to ( 250) AT2G19810 | Symbols: | zinc finger (CCCH-type) family protein | chr2:8550419-8551498 FORWARDmoderately similar to ( 394) loc_os05g10670 12005.m05538 protein zinc finger C-x8-C-x5-C-x3-H type family protein, expressed seq=cds; coord=6:132663265..132665063:1; parent_gene=GRMZM5G801627	-0.563488
27.3.12	RNA.regulation of transcription.C3H zinc finger family	grmzm2g107491_t01	Transcript	moderately similar to ( 452) AT3G02830 | Symbols: ZFN1 | ZFN1 (ZINC FINGER PROTEIN 1); DNA binding / nuclease/ nucleic acid binding | chr3:614075-615916 FORWARDhighly similar to ( 711) ZFNL2_ORYSA Zinc finger CCCH domain-containing protein ZFN-like 2 - Oryza sativa (Rice)highly similar to ( 711) loc_os01g68860 12001.m43436 protein zinc finger CCCH type domain-containing protein ZFN-like 2, putati…	-0.509376
27.3.12	RNA.regulation of transcription.C3H zinc finger family	grmzm2g100794_t01	Transcript	moderately similar to ( 458) AT3G02830 | Symbols: ZFN1 | ZFN1 (ZINC FINGER PROTEIN 1); DNA binding / nuclease/ nucleic acid binding | chr3:614075-615916 FORWARDhighly similar to ( 524) ZFNL_PEA Zinc finger CCCH domain-containing protein ZFN-like - Pisum sativum (Garden pea)highly similar to ( 769) loc_os11g28270 12011.m079994 protein zinc finger CCCH type domain-containing protein ZFN-like, putat…		1.20724	0.893757
27.3.12	RNA.regulation of transcription.C3H zinc finger family	grmzm2g348914_t01	Transcript	weakly similar to ( 133) AT5G07500 | Symbols: PEI1 | PEI1; nucleic acid binding / transcription factor/ zinc-mediated transcriptional activator | chr5:2372716-2373453 FORWARDmoderately similar to ( 204) loc_os07g47240 12007.m08941 protein expressed protein seq=cds; coord=7:172107500..172109234:-1; parent_gene=GRMZM2G348914		-1.4696	0.809835
27.3.12	RNA.regulation of transcription.C3H zinc finger family	grmzm2g004795_t01	Transcript	weakly similar to ( 110) AT4G29190 | Symbols: | zinc finger (CCCH-type) family protein | chr4:14392233-14393303 REVERSEmoderately similar to ( 252) loc_os05g45020 12005.m08627 protein CCCH transcription factor, putative, expressed seq=cds; coord=6:160013893..160016282:1; parent_gene=GRMZM2G004795		-2.52771
27.3.12	RNA.regulation of transcription.C3H zinc finger family	grmzm2g086994_t01	Transcript	moderately similar to ( 398) AT2G47850 | Symbols: | zinc finger (CCCH-type) family protein | chr2:19595953-19598119 FORWARDhighly similar to ( 727) ZFNL1_ORYSA Zinc finger CCCH domain-containing protein ZFN-like 1 - Oryza sativa (Rice)highly similar to ( 727) loc_os01g15460 12001.m42635 protein zinc finger CCCH type domain-containing protein ZFN-like 1, putative, expressed seq=cds; coord=3:369435…		0.948211	0.967681
27.3.12	RNA.regulation of transcription.C3H zinc finger family	grmzm5g845366_t01	Transcript	moderately similar to ( 434) AT2G41900 | Symbols: | zinc finger (CCCH-type) family protein | chr2:17491352-17493502 FORWARDhighly similar to ( 786) loc_os03g49170 12003.m101454 protein nucleic acid binding protein, putative, expressed seq=cds; coord=5:12382780..12384893:1; parent_gene=GRMZM5G845366		1.13287	0.717545
27.3.12	RNA.regulation of transcription.C3H zinc finger family	grmzm2g151689_t01	Transcript	weakly similar to ( 177) AT3G12130 | Symbols: | KH domain-containing protein / zinc finger (CCCH type) family protein | chr3:3864486-3866406 REVERSEmoderately similar to ( 346) loc_os06g41384 12006.m91818 protein zinc finger C-x8-C-x5-C-x3-H type family protein, expressed seq=cds; coord=9:100506849..100509721:1; parent_gene=GRMZM2G151689			0.51599
27.3.12	RNA.regulation of transcription.C3H zinc finger family	grmzm2g110402_t01	Transcript	weakly similar to ( 167) AT3G12130 | Symbols: | KH domain-containing protein / zinc finger (CCCH type) family protein | chr3:3864486-3866406 REVERSEmoderately similar to ( 276) loc_os06g41384 12006.m91818 protein zinc finger C-x8-C-x5-C-x3-H type family protein, expressed seq=cds; coord=6:98313412..98316578:1; parent_gene=GRMZM2G110402			0.600035
27.3.12	RNA.regulation of transcription.C3H zinc finger family	grmzm2g036837_t01	Transcript	moderately similar to ( 402) AT2G47850 | Symbols: | zinc finger (CCCH-type) family protein | chr2:19595953-19598119 FORWARDhighly similar to ( 721) ZFNL1_ORYSA Zinc finger CCCH domain-containing protein ZFN-like 1 - Oryza sativa (Rice)highly similar to ( 721) loc_os01g15460 12001.m42635 protein zinc finger CCCH type domain-containing protein ZFN-like 1, putative, expressed seq=cds; coord=8:491596…			0.532255
27.3.12	RNA.regulation of transcription.C3H zinc finger family	grmzm2g087032_t01	Transcript	moderately similar to ( 457) AT3G02830 | Symbols: ZFN1 | ZFN1 (ZINC FINGER PROTEIN 1); DNA binding / nuclease/ nucleic acid binding | chr3:614075-615916 FORWARDhighly similar to ( 699) ZFNL2_ORYSA Zinc finger CCCH domain-containing protein ZFN-like 2 - Oryza sativa (Rice)highly similar to ( 699) loc_os01g68860 12001.m43436 protein zinc finger CCCH type domain-containing protein ZFN-like 2, putati…			0.593657
CCAAT-HAP
BinCode	BinName	id	type	description	ra1	ra2	ra3
27.3.14	RNA.regulation of transcription.CCAAT box binding factor family, HAP2	grmzm2g000686_t01	Transcript	weakly similar to ( 146) AT3G14020 | Symbols: NF-YA6 | NF-YA6 (NUCLEAR FACTOR Y, SUBUNIT A6); transcription factor | chr3:4642968-4644301 FORWARDmoderately similar to ( 261) loc_os03g07880 12003.m35594 protein nuclear transcription factor Y subunit A-3, putative, expressed seq=cds; coord=1:15806192..15809456:-1; parent_gene=GRMZM2G000686	-0.367965
27.3.15	RNA.regulation of transcription.CCAAT box binding factor family, HAP3	grmzm2g124663_t01	Transcript	weakly similar to ( 186) AT5G47670 | Symbols: NF-YB6 | NF-YB6 (NUCLEAR FACTOR Y, SUBUNIT B6); transcription activator/ transcription activator binding / transcription factor | chr5:19315358-19315975 FORWARDweakly similar to ( 147) NFYB_MAIZE Nuclear transcription factor Y subunit B (NF-YB) (CAAT-box DNA-binding protein subunit B) - Zea mays (Maize)moderately similar to ( 244) loc_os02g49370 12002…	-0.992012
27.3.16	RNA.regulation of transcription.CCAAT box binding factor family, HAP5	grmzm2g113127_t01	Transcript	weakly similar to ( 174) AT1G08970 | Symbols: HAP5C, NF-YC9 | NF-YC9 (NUCLEAR FACTOR Y, SUBUNIT C9); DNA binding / transcription factor | chr1:2883144-2883839 FORWARDmoderately similar to ( 236) loc_os08g38780 12008.m07861 protein nuclear transcription factor Y subunit C-2, putative, expressed seq=cds; coord=1:183775356..183776862:1; parent_gene=GRMZM2G113127	0.728291		0.728291
27.3.16	RNA.regulation of transcription.CCAAT box binding factor family, HAP5	grmzm2g124421_t01	Transcript	weakly similar to ( 189) AT1G56170 | Symbols: HAP5B, ATHAP5B, NF-YC2 | NF-YC2 (NUCLEAR FACTOR Y, SUBUNIT C2); DNA binding / transcription activator/ transcription factor | chr1:21025118-21025717 FORWARDmoderately similar to ( 240) loc_os02g07450 12002.m33577 protein nuclear transcription factor Y subunit C-2, putative, expressed seq=cds; coord=9:110455650..110460038:-1; parent_gene=GRMZM2G124421	0.765104		0.765104
27.3.16	RNA.regulation of transcription.CCAAT box binding factor family, HAP5	grmzm2g440949_t01	Transcript	weakly similar to ( 165) AT3G12480 | Symbols: NF-YC11 | NF-YC11 (NUCLEAR FACTOR Y, SUBUNIT C11); DNA binding / transcription factor | chr3:3958065-3960278 FORWARDmoderately similar to ( 286) loc_os05g41450 12005.m08320 protein dr1-associated corepressor, putative, expressed seq=cds; coord=6:155661607..155667746:1; parent_gene=GRMZM2G440949	1.27094		1.27094	*
27.3.14	RNA.regulation of transcription.CCAAT box binding factor family, HAP2	grmzm2g038303_t01	Transcript	weakly similar to ( 132) AT1G72830 | Symbols: HAP2C, ATHAP2C, NF-YA3 | NF-YA3 (NUCLEAR FACTOR Y, SUBUNIT A3); transcription factor | chr1:27405699-27407088 REVERSEmoderately similar to ( 281) loc_os07g41720 12007.m29255 protein nuclear transcription factor Y subunit A-3, putative, expressed seq=cds; coord=7:164991494..164995805:-1; parent_gene=GRMZM2G038303			1.10082
27.3.14	RNA.regulation of transcription.CCAAT box binding factor family, HAP2	grmzm5g857944_t01	Transcript	weakly similar to ( 133) AT1G72830 | Symbols: HAP2C, ATHAP2C, NF-YA3 | NF-YA3 (NUCLEAR FACTOR Y, SUBUNIT A3); transcription factor | chr1:27405699-27407088 REVERSEmoderately similar to ( 268) loc_os02g53620 12002.m10391 protein nuclear transcription factor Y subunit A-3, putative, expressed seq=cds; coord=5:211666408..211671351:-1; parent_gene=GRMZM5G857944			0.728203
27.3.14	RNA.regulation of transcription.CCAAT box binding factor family, HAP2	grmzm2g104396_t01	Transcript	weakly similar to ( 129) AT1G30500 | Symbols: NF-YA7 | NF-YA7 (NUCLEAR FACTOR Y, SUBUNIT A7); specific transcriptional repressor/ transcription factor | chr1:10804736-10805896 REVERSEmoderately similar to ( 275) loc_os12g41880 12012.m26973 protein nuclear transcription factor Y subunit A-7, putative, expressed seq=cds; coord=3:123411825..123418866:-1; parent_gene=GRMZM2G104396			0.900905
27.3.15	RNA.regulation of transcription.CCAAT box binding factor family, HAP3	grmzm2g012654_t01	Transcript	weakly similar to ( 124) AT2G27470 | Symbols: NF-YB11 | NF-YB11 (NUCLEAR FACTOR Y, SUBUNIT B11); transcription factor | chr2:11745196-11746375 REVERSEweakly similar to ( 180) loc_os09g39490 12009.m06887 protein DNA polymerase epsilon subunit 3, putative, expressed seq=cds; coord=7:68977359..68979646:1; parent_gene=GRMZM2G012654			0.702156
27.3.15	RNA.regulation of transcription.CCAAT box binding factor family, HAP3	grmzm2g303465_t01	Transcript	weakly similar to ( 171) AT4G14540 | Symbols: NF-YB3 | NF-YB3 (NUCLEAR FACTOR Y, SUBUNIT B3); transcription factor | chr4:8344663-8345148 FORWARDweakly similar to ( 179) NFYB_MAIZE Nuclear transcription factor Y subunit B (NF-YB) (CAAT-box DNA-binding protein subunit B) - Zea mays (Maize)weakly similar to ( 180) loc_os05g38820 12005.m27881 protein nuclear transcription factor Y subunit B-3, putat…			0.702075
27.3.15	RNA.regulation of transcription.CCAAT box binding factor family, HAP3	grmzm2g064426_t01	Transcript	weakly similar to ( 189) AT3G53340 | Symbols: NF-YB10 | NF-YB10 (NUCLEAR FACTOR Y, SUBUNIT B10); transcription factor | chr3:19774667-19775991 REVERSEmoderately similar to ( 287) NFYB_MAIZE Nuclear transcription factor Y subunit B (NF-YB) (CAAT-box DNA-binding protein subunit B) - Zea mays (Maize)moderately similar to ( 272) loc_os05g38820 12005.m27881 protein nuclear transcription factor Y subun…			0.513281
27.3.15	RNA.regulation of transcription.CCAAT box binding factor family, HAP3	grmzm5g804893_t01	Transcript	weakly similar to ( 193) AT2G37060 | Symbols: NF-YB8 | NF-YB8 (NUCLEAR FACTOR Y, SUBUNIT B8); transcription factor | chr2:15576336-15577660 FORWARDmoderately similar to ( 264) NFYB_MAIZE Nuclear transcription factor Y subunit B (NF-YB) (CAAT-box DNA-binding protein subunit B) - Zea mays (Maize)moderately similar to ( 250) loc_os05g38820 12005.m27881 protein nuclear transcription factor Y subunit …			0.539408
E2F
BinCode	BinName	id	type	description	ra1	ra2	ra3
27.3.18	RNA.regulation of transcription.E2F/DP transcription factor family	grmzm2g063387_t01	Transcript	moderately similar to ( 380) AT5G03415 | Symbols: DPB, ATDPB | DPB; protein binding / protein heterodimerization | chr5:842842-845200 FORWARDhighly similar to ( 518) loc_os03g05760 12003.m101191 protein transcription factor Dp-1, putative, expressed seq=cds; coord=9:152674938..152679863:1; parent_gene=GRMZM2G063387	-0.78563
27.3.18	RNA.regulation of transcription.E2F/DP transcription factor family	grmzm2g041701_t01	Transcript	moderately similar to ( 363) AT2G36010 | Symbols: E2F3, ATE2FA | E2F3 (E2F TRANSCRIPTION FACTOR 3); DNA binding / transcription factor | chr2:15119688-15122893 FORWARDhighly similar to ( 645) loc_os02g33430 12002.m100042 protein transcription factor E2F3, putative, expressed seq=cds; coord=4:109523517..109528342:-1; parent_gene=GRMZM2G041701		1.37464	1.22397
27.3.18	RNA.regulation of transcription.E2F/DP transcription factor family	grmzm2g050590_t01	Transcript	moderately similar to ( 219) AT5G22220 | Symbols: E2F1, E2FB, ATE2FB | E2F1; DNA binding / protein binding / transcription factor | chr5:7360749-7364120 FORWARDmoderately similar to ( 349) loc_os04g02140 12004.m05530 protein E2F-related protein, putative, expressed seq=cds; coord=2:112596556..112601748:-1; parent_gene=GRMZM2G050590		1.01001	0.917405
27.3.18	RNA.regulation of transcription.E2F/DP transcription factor family	grmzm2g086072_t01	Transcript	moderately similar to ( 380) AT5G03415 | Symbols: DPB, ATDPB | DPB; protein binding / protein heterodimerization | chr5:842842-845200 FORWARDmoderately similar to ( 492) loc_os03g05760 12003.m101191 protein transcription factor Dp-1, putative, expressed seq=cds; coord=1:11481331..11488611:1; parent_gene=GRMZM2G086072		1.00124
27.3.18	RNA.regulation of transcription.E2F/DP transcription factor family	grmzm2g139024_t01	Transcript	moderately similar to ( 334) AT5G03415 | Symbols: DPB, ATDPB | DPB; protein binding / protein heterodimerization | chr5:842842-845200 FORWARDmoderately similar to ( 405) loc_os10g30420 12010.m05904 protein transcription factor Dp-1, putative, expressed seq=cds; coord=5:32424803..32462467:1; parent_gene=GRMZM2G139024		1.04612	1.02091
27.3.18	RNA.regulation of transcription.E2F/DP transcription factor family	grmzm2g462623_t01	Transcript	weakly similar to ( 141) AT5G03415 | Symbols: DPB, ATDPB | DPB; protein binding / protein heterodimerization | chr5:842842-845200 FORWARDmoderately similar to ( 286) loc_os01g48700 12001.m11060 protein transcription factor Dp-2, putative, expressed seq=cds; coord=8:150872681..150878195:-1; parent_gene=GRMZM2G462623			0.752345
27.3.18	RNA.regulation of transcription.E2F/DP transcription factor family	grmzm2g361659_t01	Transcript	moderately similar to ( 311) AT3G48160 | Symbols: DEL1, E2L3, E2FE | DEL1 (DP-E2F-LIKE 1); DNA binding / transcription factor | chr3:17783641-17785846 FORWARDhighly similar to ( 587) loc_os02g50630 12002.m10097 protein transcription regulator of the cell cycle TaE2Fe, putative, expressed seq=cds; coord=4:182731497..182735090:1; parent_gene=GRMZM2G361659			0.845097
GARP
BinCode	BinName	id	type	description	ra1	ra2	ra3
27.3.20	RNA.regulation of transcription.G2-like transcription factor family, GARP	grmzm2g398055_t01	Transcript	weakly similar to ( 179) AT3G10760 | Symbols: | myb family transcription factor | chr3:3369814-3370821 FORWARDmoderately similar to ( 256) loc_os05g34110 12005.m07643 protein myb-like DNA-binding domain, SHAQKYF class family protein, expressed seq=cds; coord=6:147024173..147026212:-1; parent_gene=GRMZM2G398055	-1.11781	-1.1245
27.3.20	RNA.regulation of transcription.G2-like transcription factor family, GARP	grmzm2g374986_t01	Transcript	weakly similar to ( 117) AT2G40260 | Symbols: | myb family transcription factor | chr2:16816818-16818473 REVERSEweakly similar to ( 196) loc_os03g03760 12003.m05909 protein myb-like DNA-binding domain, SHAQKYF class family protein, expressed seq=cds; coord=9:153449284..153453177:1; parent_gene=GRMZM2G374986	-1.43032
27.3.20	RNA.regulation of transcription.G2-like transcription factor family, GARP	grmzm2g070865_t01	Transcript	weakly similar to ( 120) AT1G32240 | Symbols: KAN2 | KAN2 (KANADI 2); DNA binding / transcription factor | chr1:11625882-11630355 REVERSEmoderately similar to ( 207) loc_os02g46940 12002.m09730 protein KAN, putative, expressed seq=cds; coord=4:158068289..158073370:1; parent_gene=GRMZM2G070865	-0.715428
27.3.20	RNA.regulation of transcription.G2-like transcription factor family, GARP	grmzm2g471600_t01	Transcript	weakly similar to ( 190) AT3G10760 | Symbols: | myb family transcription factor | chr3:3369814-3370821 FORWARDmoderately similar to ( 288) loc_os05g34110 12005.m07643 protein myb-like DNA-binding domain, SHAQKYF class family protein, expressed seq=cds; coord=8:104819411..104820748:-1; parent_gene=GRMZM2G471600	-1.48957
27.3.20	RNA.regulation of transcription.G2-like transcription factor family, GARP	grmzm2g168002_t01	Transcript	very weakly similar to (80.9) AT1G79430 | Symbols: APL, WDY | APL (ALTERED PHLOEM DEVELOPMENT); transcription factor/ transcription regulator | chr1:29877521-29879135 REVERSEweakly similar to ( 112) loc_os08g33750 12008.m26696 protein MYR1, putative, expressed seq=cds; coord=4:83196578..83198800:1; parent_gene=GRMZM2G168002	-0.650521
27.3.20	RNA.regulation of transcription.G2-like transcription factor family, GARP	grmzm2g173882_t01	Transcript	weakly similar to ( 156) AT2G03500 | Symbols: | myb family transcription factor | chr2:1059926-1062259 FORWARDmoderately similar to ( 367) loc_os07g02800 12007.m29048 protein myb-like DNA-binding domain, SHAQKYF class family protein, expressed seq=cds; coord=2:236187625..236189534:-1; parent_gene=GRMZM2G173882	-1.29876
27.3.20	RNA.regulation of transcription.G2-like transcription factor family, GARP	grmzm2g159119_t01	Transcript	weakly similar to ( 192) AT1G25550 | Symbols: | myb family transcription factor | chr1:8976644-8977942 FORWARDmoderately similar to ( 301) loc_os02g22020 12002.m07440 protein DNA binding protein, putative, expressed seq=cds; coord=10:5122182..5124287:-1; parent_gene=GRMZM2G159119	-0.829197		0.938807
27.3.20	RNA.regulation of transcription.G2-like transcription factor family, GARP	grmzm2g082264_t01	Transcript	weakly similar to ( 172) AT5G16560 | Symbols: KAN, KAN1 | KAN (KANADI); transcription factor | chr5:5407365-5411092 REVERSEmoderately similar to ( 363) loc_os09g23200 12009.m05477 protein myb-like DNA-binding domain, SHAQKYF class family protein seq=cds; coord=7:107233099..107239626:-1; parent_gene=GRMZM2G082264	-0.761054
27.3.20	RNA.regulation of transcription.G2-like transcription factor family, GARP	grmzm2g060834_t01	Transcript	weakly similar to ( 116) AT1G32240 | Symbols: KAN2 | KAN2 (KANADI 2); DNA binding / transcription factor | chr1:11625882-11630355 REVERSEweakly similar to ( 158) loc_os02g46940 12002.m09730 protein KAN, putative, expressed seq=cds; coord=5:199288141..199293157:-1; parent_gene=GRMZM2G060834	-0.684394
27.3.20	RNA.regulation of transcription.G2-like transcription factor family, GARP	grmzm2g016370_t01	Transcript	weakly similar to ( 189) AT1G25550 | Symbols: | myb family transcription factor | chr1:8976644-8977942 FORWARDmoderately similar to ( 290) loc_os02g22020 12002.m07440 protein DNA binding protein, putative, expressed seq=cds; coord=10:5384582..5386647:1; parent_gene=GRMZM2G016370	-1.61363
27.3.20	RNA.regulation of transcription.G2-like transcription factor family, GARP	ac234520.1_fgt003	Transcript	weakly similar to ( 112) AT2G03500 | Symbols: | myb family transcription factor | chr2:1059926-1062259 FORWARDweakly similar to ( 162) loc_os12g39640 12012.m07748 protein DNA binding protein, putative, expressed seq=cds; coord=1:164369081..164369911:-1; parent_gene=AC234520.1_FG003	-1.58276	-1.15738	-1.09707
27.3.20	RNA.regulation of transcription.G2-like transcription factor family, GARP	grmzm2g117854_t01	Transcript	weakly similar to ( 167) AT2G01060 | Symbols: | myb family transcription factor | chr2:73456-74902 REVERSEmoderately similar to ( 352) loc_os05g41240 12005.m27895 protein MYB transcription factor, putative, expressed seq=cds; coord=6:155520554..155524228:-1; parent_gene=GRMZM2G117854		0.841012	1.16731
27.3.20	RNA.regulation of transcription.G2-like transcription factor family, GARP	grmzm2g090061_t01	Transcript	very weakly similar to (90.9) AT4G13640 | Symbols: UNE16 | UNE16 (unfertilized embryo sac 16); transcription factor | chr4:7936864-7938497 REVERSEweakly similar to ( 163) loc_os09g12750 12009.m04538 protein myb family transcription factor-related protein, putative, expressed seq=cds; coord=2:173424177..173426267:1; parent_gene=GRMZM2G090061			0.828229
27.3.20	RNA.regulation of transcription.G2-like transcription factor family, GARP	grmzm2g124540_t01	Transcript	weakly similar to ( 106) AT2G03500 | Symbols: | myb family transcription factor | chr2:1059926-1062259 FORWARDweakly similar to ( 148) loc_os07g02800 12007.m29048 protein myb-like DNA-binding domain, SHAQKYF class family protein, expressed seq=cds; coord=1:280218237..280220278:1; parent_gene=GRMZM2G124540			1.20685
27.3.20	RNA.regulation of transcription.G2-like transcription factor family, GARP	grmzm2g083472_t01	Transcript	weakly similar to ( 142) AT3G13040 | Symbols: | myb family transcription factor | chr3:4172415-4174456 REVERSEmoderately similar to ( 322) loc_os06g49040 12006.m09430 protein transfactor-like protein, putative, expressed seq=cds; coord=5:58136739..58139375:1; parent_gene=GRMZM2G083472			0.960926
GRAS
BinCode	BinName	id	type	description	ra1	ra2	ra3
27.3.21	RNA.regulation of transcription.GRAS transcription factor family	grmzm2g114680_t01	Transcript	moderately similar to ( 223) AT1G55580 | Symbols: LAS, SCL18 | LAS (Lateral Suppressor); transcription factor | chr1:20764106-20765443 FORWARDmoderately similar to ( 480) MOC_ORYSA Protein MONOCULM 1 - Oryza sativa (Rice)moderately similar to ( 480) loc_os06g40780 12006.m08613 protein protein MONOCULM 1, putative, expressed seq=cds; coord=9:102346272..102355352:-1; parent_gene=GRMZM2G114680	-1.49768
27.3.21	RNA.regulation of transcription.GRAS transcription factor family	grmzm2g015080_t01	Transcript	moderately similar to ( 479) AT3G54220 | Symbols: SCR, SGR1 | SCR (SCARECROW); protein binding / protein homodimerization/ sequence-specific DNA binding / transcription factor | chr3:20070550-20072625 FORWARDweakly similar to ( 187) CIGR1_ORYSA Chitin-inducible gibberellin-responsive protein 1 - Oryza sativa (Rice)highly similar to ( 561) loc_os12g02870 12012.m04285 protein DELLA protein GAI1, pu…	-0.860462
27.3.21	RNA.regulation of transcription.GRAS transcription factor family	grmzm2g143433_t01	Transcript	moderately similar to ( 239) AT1G55580 | Symbols: LAS, SCL18 | LAS (Lateral Suppressor); transcription factor | chr1:20764106-20765443 FORWARDmoderately similar to ( 407) MOC_ORYSA Protein MONOCULM 1 - Oryza sativa (Rice)moderately similar to ( 460) loc_os02g10360 12002.m06334 protein protein MONOCULM 1, putative seq=cds; coord=5:120483757..120485007:1; parent_gene=GRMZM2G143433	-1.40748
27.3.21	RNA.regulation of transcription.GRAS transcription factor family	grmzm2g176537_t01	Transcript	weakly similar to ( 135) AT5G41920 | Symbols: | scarecrow transcription factor family protein | chr5:16779982-16781199 FORWARDweakly similar to ( 126) GAI1_VITVI DELLA protein GAI1 (Gibberellic acid-insensitive mutant protein 1) (VvGAI1) - Vitis vinifera (Grape)moderately similar to ( 377) loc_os04g35250 12004.m08615 protein protein MONOCULM 1, putative seq=cds; coord=10:117318075..117319860:-1; …	-1.12395
27.3.21	RNA.regulation of transcription.GRAS transcription factor family	grmzm2g106548_t01	Transcript	moderately similar to ( 415) AT5G41920 | Symbols: | scarecrow transcription factor family protein | chr5:16779982-16781199 FORWARDweakly similar to ( 174) GAI1_VITVI DELLA protein GAI1 (Gibberellic acid-insensitive mutant protein 1) (VvGAI1) - Vitis vinifera (Grape)highly similar to ( 618) loc_os07g38030 12007.m08052 protein nodulation signaling pathway 2 protein, putative, expressed seq=cds; coo…	-0.685831
27.3.21	RNA.regulation of transcription.GRAS transcription factor family	grmzm2g110067_t01	Transcript	moderately similar to ( 218) AT3G13840 | Symbols: | scarecrow transcription factor family protein | chr3:4555305-4556837 REVERSEmoderately similar to ( 236) NSP1_MEDTR Nodulation signaling pathway 1 protein - Medicago truncatula (Barrel medic)moderately similar to ( 483) loc_os03g29480 12003.m08221 protein nodulation signaling pathway 1 protein, putative, expressed seq=cds; coord=1:71022756..7102…	-1.31254
27.3.21	RNA.regulation of transcription.GRAS transcription factor family	ac198366.3_fgt004	Transcript	moderately similar to ( 313) AT1G50420 | Symbols: SCL3, SCL-3 | SCL3; transcription factor | chr1:18678177-18679625 REVERSEweakly similar to ( 122) SLN1_HORVU DELLA protein SLN1 (Slender protein 1) - Hordeum vulgare (Barley)highly similar to ( 641) loc_os12g04370 12012.m04431 protein GRAS family transcription factor containing protein, expressed seq=cds; coord=10:1887926..1889446:1; parent_gene=A…	-1.53186
27.3.21	RNA.regulation of transcription.GRAS transcription factor family	grmzm2g082387_t01	Transcript	moderately similar to ( 377) AT1G50420 | Symbols: SCL3, SCL-3 | SCL3; transcription factor | chr1:18678177-18679625 REVERSEweakly similar to ( 185) CIGR1_ORYSA Chitin-inducible gibberellin-responsive protein 1 - Oryza sativa (Rice)highly similar to ( 655) loc_os01g71970 12001.m13235 protein GRAS family transcription factor containing protein, expressed seq=cds; coord=3:150830511..150832666:-1; pa…	-0.513198
27.3.21	RNA.regulation of transcription.GRAS transcription factor family	grmzm2g131516_t01	Transcript	weakly similar to ( 195) AT3G54220 | Symbols: SCR, SGR1 | SCR (SCARECROW); protein binding / protein homodimerization/ sequence-specific DNA binding / transcription factor | chr3:20070550-20072625 FORWARDvery weakly similar to (87.0) CIGR1_ORYSA Chitin-inducible gibberellin-responsive protein 1 - Oryza sativa (Rice)moderately similar to ( 232) loc_os12g02870 12012.m04285 protein DELLA protein GAI…	-0.646121
27.3.21	RNA.regulation of transcription.GRAS transcription factor family	grmzm2g051785_t01	Transcript	moderately similar to ( 222) AT4G00150 | Symbols: | scarecrow-like transcription factor 6 (SCL6) | chr4:57429-59105 REVERSEweakly similar to ( 102) GAIP_CUCMA DELLA protein GAIP (Gibberellic acid-insensitive phloem protein) (GAIP) (CmGAIP) - Cucurbita maxima (Pumpkin) (Winter squash)moderately similar to ( 418) loc_os06g01620 12006.m04899 protein scarecrow-like 6, putative, expressed seq=cds; coo…	-1.2023
27.3.21	RNA.regulation of transcription.GRAS transcription factor family	grmzm2g028438_t01	Transcript	weakly similar to ( 200) AT5G52510 | Symbols: | scarecrow-like transcription factor 8 (SCL8) | chr5:21307196-21309118 FORWARDweakly similar to ( 139) CIGR2_ORYSA Chitin-inducible gibberellin-responsive protein 2 - Oryza sativa (Rice)highly similar to ( 508) loc_os02g45760 12002.m09613 protein chitin-inducible gibberellin-responsive protein 2, putative, expressed seq=cds; coord=4:156022485..156024…	-0.991342
27.3.21	RNA.regulation of transcription.GRAS transcription factor family	ac234164.1_fgt004	Transcript	moderately similar to ( 353) AT1G63100 | Symbols: | scarecrow transcription factor family protein | chr1:23399391-23401367 REVERSEweakly similar to ( 154) DWRF8_MAIZE DELLA protein DWARF8 (Protein dwarf-8) - Zea mays (Maize)highly similar to ( 738) loc_os06g03710 12006.m05103 protein DELLA protein SLR1, putative, expressed seq=cds; coord=9:24972213..24974672:1; parent_gene=AC234164.1_FG004	-1.15111
27.3.21	RNA.regulation of transcription.GRAS transcription factor family	grmzm2g132794_t01	Transcript	moderately similar to ( 389) AT4G37650 | Symbols: SHR, SGR7 | SHR (SHORT ROOT); protein binding / sequence-specific DNA binding / transcription factor | chr4:17691871-17693466 FORWARDweakly similar to ( 125) CIGR2_ORYSA Chitin-inducible gibberellin-responsive protein 2 - Oryza sativa (Rice)highly similar to ( 587) loc_os03g31880 12003.m08434 protein SHR, putative, expressed seq=cds; coord=1:77486…	-0.734948
27.3.21	RNA.regulation of transcription.GRAS transcription factor family	grmzm2g079625_t01	Transcript	very weakly similar to (95.1) AT5G59460 | Symbols: | scarecrow-like transcription factor 11 (SCL11) | chr5:23976968-23978291 REVERSEmoderately similar to ( 207) loc_os01g05130 12001.m07146 protein expressed protein seq=cds; coord=3:18010870..18014247:-1; parent_gene=GRMZM2G079625			0.974429
27.3.21	RNA.regulation of transcription.GRAS transcription factor family	grmzm5g821439_t01	Transcript	moderately similar to ( 498) AT5G48150 | Symbols: PAT1 | PAT1 (phytochrome a signal transduction 1); signal transducer/ transcription factor | chr5:19522497-19524053 REVERSEhighly similar to ( 988) CIGR1_ORYSA Chitin-inducible gibberellin-responsive protein 1 - Oryza sativa (Rice)highly similar to ( 988) loc_os07g36170 12007.m079710 protein chitin-inducible gibberellin-responsive protein 1, putat…			1.00963
27.3.21	RNA.regulation of transcription.GRAS transcription factor family	grmzm2g129154_t01	Transcript	moderately similar to ( 357) AT1G50420 | Symbols: SCL3, SCL-3 | SCL3; transcription factor | chr1:18678177-18679625 REVERSEweakly similar to ( 184) CIGR1_ORYSA Chitin-inducible gibberellin-responsive protein 1 - Oryza sativa (Rice)highly similar to ( 608) loc_os01g71970 12001.m13235 protein GRAS family transcription factor containing protein, expressed seq=cds; coord=8:159017496..159019119:-1; pa…			1.0329
Homeobox
BinCode	BinName	id	type	description	ra1	ra2	ra3
27.3.22	RNA.regulation of transcription.HB,Homeobox transcription factor family	grmzm2g034113_t01	Transcript	weakly similar to ( 136) AT2G46680 | Symbols: ATHB-7, ATHB7 | ATHB-7 (ARABIDOPSIS THALIANA HOMEOBOX 7); transcription activator/ transcription factor | chr2:19165777-19166773 REVERSEmoderately similar to ( 263) loc_os09g35910 12009.m22175 protein homeodomain-leucine zipper transcription factor TaHDZipI-1, putative, expressed seq=cds; coord=2:195055592..195057280:-1; parent_gene=GRMZM2G034113	-1.16585
27.3.22	RNA.regulation of transcription.HB,Homeobox transcription factor family	grmzm2g458728_t01	Transcript	moderately similar to ( 212) AT2G35940 | Symbols: BLH1 | BLH1 (BEL1-LIKE HOMEODOMAIN 1); DNA binding / protein heterodimerization/ protein homodimerization/ transcription factor | chr2:15089171-15091699 REVERSEhighly similar to ( 523) loc_os11g06020 12011.m04798 protein BEL1-like homeodomain transcription factor, putative, expressed seq=cds; coord=4:212321051..212326573:-1; parent_gene=GRMZM2G458…	-1.25158
27.3.22	RNA.regulation of transcription.HB,Homeobox transcription factor family	grmzm2g028622_t01	Transcript	weakly similar to ( 119) AT2G17950 | Symbols: WUS, PGA6, WUS1 | WUS (WUSCHEL); DNA binding / protein binding / transcription factor/ transcription regulator | chr2:7809100-7810671 REVERSEweakly similar to ( 122) WUS_ANTMA Protein WUSCHEL (Protein ROSULATA) - Antirrhinum majus (Garden snapdragon)weakly similar to ( 168) loc_os04g56780 12004.m10565 protein protein WUSCHEL, putative, expressed seq=c…	-0.950455
27.3.22	RNA.regulation of transcription.HB,Homeobox transcription factor family	grmzm2g142962_t01	Transcript	weakly similar to ( 106) AT5G06710 | Symbols: HAT14 | HAT14 (HOMEOBOX FROM ARABIDOPSIS THALIANA); DNA binding / transcription factor | chr5:2069093-2070284 REVERSEmoderately similar to ( 210) loc_os08g36220 12008.m07611 protein homeobox-leucine zipper protein HAT14, putative, expressed seq=cds; coord=1:198192712..198194680:-1; parent_gene=GRMZM2G142962	-0.968261
27.3.22	RNA.regulation of transcription.HB,Homeobox transcription factor family	grmzm2g076272_t01	Transcript	weakly similar to ( 162) AT4G32980 | Symbols: ATH1 | ATH1 (ARABIDOPSIS THALIANA HOMEOBOX GENE 1); DNA binding / sequence-specific DNA binding / transcription factor | chr4:15914865-15916873 REVERSEmoderately similar to ( 322) loc_os06g36680 12006.m08203 protein BEL1-related homeotic protein 13, putative, expressed seq=cds; coord=9:57185788..57188160:-1; parent_gene=GRMZM2G076272	-0.646903		-0.666422
27.3.22	RNA.regulation of transcription.HB,Homeobox transcription factor family	grmzm2g041127_t01	Transcript	weakly similar to ( 156) AT4G40060 | Symbols: ATHB16, ATHB-16 | ATHB16 (ARABIDOPSIS THALIANA HOMEOBOX PROTEIN 16); sequence-specific DNA binding / transcription activator/ transcription factor | chr4:18571682-18572774 REVERSEmoderately similar to ( 291) loc_os09g29460 12009.m06097 protein homeobox-leucine zipper protein ATHB-6, putative, expressed seq=cds; coord=2:188061828..188064431:1; parent_g…	-0.640803		0.894185
27.3.22	RNA.regulation of transcription.HB,Homeobox transcription factor family	grmzm2g163761_t01	Transcript	weakly similar to ( 120) AT2G16400 | Symbols: BLH7 | BLH7 (bell1-like homeodomain 7); DNA binding / transcription factor | chr2:7101490-7103200 REVERSEweakly similar to ( 126) loc_os03g47730 12003.m09784 protein knotted1-interacting protein, putative, expressed seq=cds; coord=1:256513586..256515267:1; parent_gene=GRMZM2G163761	-1.5419
27.3.22	RNA.regulation of transcription.HB,Homeobox transcription factor family	grmzm2g122537_t01	Transcript	weakly similar to ( 107) AT2G28610 | Symbols: PRS, WOX3, PRS1 | PRS (PRESSED FLOWER); transcription factor | chr2:12262115-12263286 FORWARDweakly similar to ( 110) WOX3B_MAIZE WUSCHEL-related homeobox 3B (Narrow sheath protein 2) - Zea mays (Maize)weakly similar to ( 166) loc_os05g02730 12005.m04809 protein WUSCHEL-related homeobox 3B, putative seq=cds; coord=6:30106758..30108107:1; parent_gene=G…	-1.12513
27.3.22	RNA.regulation of transcription.HB,Homeobox transcription factor family	grmzm2g127537_t01	Transcript	weakly similar to ( 194) AT5G06710 | Symbols: HAT14 | HAT14 (HOMEOBOX FROM ARABIDOPSIS THALIANA); DNA binding / transcription factor | chr5:2069093-2070284 REVERSEmoderately similar to ( 253) loc_os09g27450 12009.m05897 protein homeobox-leucine zipper protein HAT14, putative, expressed seq=cds; coord=7:123504323..123506231:-1; parent_gene=GRMZM2G127537	-0.79084
27.3.22	RNA.regulation of transcription.HB,Homeobox transcription factor family	grmzm2g409881_t01	Transcript	weakly similar to ( 124) AT2G33880 | Symbols: WOX9, HB-3, STIP | HB-3; transcription factor | chr2:14341639-14343597 REVERSEweakly similar to ( 164) loc_os05g48990 12005.m08970 protein homeobox domain containing protein, expressed seq=cds; coord=6:164645642..164649858:1; parent_gene=GRMZM2G409881	-1.10918
27.3.22	RNA.regulation of transcription.HB,Homeobox transcription factor family	grmzm2g021339_t01	Transcript	weakly similar to ( 184) AT3G01470 | Symbols: ATHB-1, ATHB1, HD-ZIP-1, HAT5 | ATHB-1 (ARABIDOPSIS THALIANA HOMEOBOX 1); DNA binding / protein homodimerization/ sequence-specific DNA binding / transcription activator/ transcription factor | chr3:182648-184034 REVERSEmoderately similar to ( 344) loc_os02g49700 12002.m33448 protein homeodomain leucine zipper protein CPHB-5, putative, expressed seq=c…	-1.22132
27.3.22	RNA.regulation of transcription.HB,Homeobox transcription factor family	grmzm2g094241_t01	Transcript	moderately similar to ( 243) AT1G23380 | Symbols: KNAT6, KNAT6L, KNAT6S | KNAT6; DNA binding / transcription activator/ transcription factor | chr1:8297499-8302492 REVERSEmoderately similar to ( 226) RSH1_MAIZE Homeobox protein rough sheath 1 - Zea mays (Maize)moderately similar to ( 384) loc_os05g03884 12005.m04922 protein homeotic protein knotted-1, putative, expressed seq=cds; coord=8:13085043…	-0.674739
27.3.22	RNA.regulation of transcription.HB,Homeobox transcription factor family	grmzm2g433591_t01	Transcript	moderately similar to ( 398) AT5G25220 | Symbols: KNAT3 | KNAT3 (KNOTTED1-LIKE HOMEOBOX GENE 3); transcription activator/ transcription factor | chr5:8736208-8738087 FORWARDmoderately similar to ( 397) KNAP3_MALDO Homeobox protein knotted-1-like 3 (KNAP3) - Malus domestica (Apple) (Malus sylvestris)moderately similar to ( 469) loc_os02g08544 12002.m33583 protein homeobox protein knotted-1-like 3,…	-0.582073		0.858812
27.3.22	RNA.regulation of transcription.HB,Homeobox transcription factor family	grmzm2g134260_t01	Transcript	weakly similar to ( 152) AT2G44910 | Symbols: ATHB4, ATHB-4 | ATHB4 (ARABIDOPSIS THALIANA HOMEOBOX-LEUCINE ZIPPER PROTEIN 4); DNA binding / transcription factor | chr2:18517887-18519525 REVERSEmoderately similar to ( 243) loc_os06g04870 12006.m05216 protein homeobox-leucine zipper protein HAT1, putative, expressed seq=cds; coord=9:20827855..20829629:-1; parent_gene=GRMZM2G134260	-1.09443
27.3.22	RNA.regulation of transcription.HB,Homeobox transcription factor family	grmzm2g105834_t01	Transcript	weakly similar to ( 118) AT4G37790 | Symbols: HAT22 | HAT22; transcription factor | chr4:17768241-17769272 FORWARDweakly similar to ( 139) loc_os03g12860 12003.m06734 protein homeobox-leucine zipper protein HAT22, putative, expressed seq=cds; coord=9:144788708..144790892:1; parent_gene=GRMZM2G105834	-1.40987
27.3.22	RNA.regulation of transcription.HB,Homeobox transcription factor family	grmzm2g333565_t01	Transcript	weakly similar to ( 143) AT4G32980 | Symbols: ATH1 | ATH1 (ARABIDOPSIS THALIANA HOMEOBOX GENE 1); DNA binding / sequence-specific DNA binding / transcription factor | chr4:15914865-15916873 REVERSEmoderately similar to ( 263) loc_os02g13310 12002.m06578 protein homeodomain protein JUBEL1, putative, expressed seq=cds; coord=5:212078393..212080651:-1; parent_gene=GRMZM2G333565	-1.25754
27.3.22	RNA.regulation of transcription.HB,Homeobox transcription factor family	grmzm2g132367_t01	Transcript	very weakly similar to ( 100) AT2G22430 | Symbols: ATHB6 | ATHB6; DNA binding / protein binding / sequence-specific DNA binding / transcription activator/ transcription factor | chr2:9526470-9527612 REVERSEmoderately similar to ( 242) loc_os03g08960 12003.m06402 protein homeodomain-leucine zipper transcription factor TaHDZipI-1, putative, expressed seq=cds; coord=1:19250907..19253207:1; parent_ge…	-0.954349
27.3.22	RNA.regulation of transcription.HB,Homeobox transcription factor family	grmzm2g004957_t01	Transcript	highly similar to ( 857) AT4G21750 | Symbols: ATML1 | ATML1 (MERISTEM LAYER 1); DNA binding / sequence-specific DNA binding / transcription factor | chr4:11556965-11560243 FORWARDhighly similar to ( 988) loc_os08g04190 12008.m04563 protein homeobox protein FWA, putative, expressed seq=cds; coord=10:84229053..84232594:1; parent_gene=GRMZM2G004957	-0.732473
27.3.22	RNA.regulation of transcription.HB,Homeobox transcription factor family	grmzm2g161435_t01	Transcript	weakly similar to ( 175) AT4G32980 | Symbols: ATH1 | ATH1 (ARABIDOPSIS THALIANA HOMEOBOX GENE 1); DNA binding / sequence-specific DNA binding / transcription factor | chr4:15914865-15916873 REVERSEmoderately similar to ( 359) loc_os02g13310 12002.m06578 protein homeodomain protein JUBEL1, putative, expressed seq=cds; coord=5:152403164..152406428:-1; parent_gene=GRMZM2G161435	-0.765979
27.3.22	RNA.regulation of transcription.HB,Homeobox transcription factor family	grmzm2g119999_t01	Transcript	weakly similar to ( 118) AT5G65310 | Symbols: ATHB5, ATHB-5 | ATHB5 (ARABIDOPSIS THALIANA HOMEOBOX PROTEIN 5); protein homodimerization/ sequence-specific DNA binding / transcription activator/ transcription factor | chr5:26102457-26103854 REVERSEmoderately similar to ( 236) loc_os10g23090 12010.m05314 protein homeodomain-leucine zipper transcription factor TaHDZipI-1, putative, expressed seq=cds…	-0.679889		-0.7405
27.3.22	RNA.regulation of transcription.HB,Homeobox transcription factor family	grmzm2g109987_t01	Transcript	nearly identical (1001) AT5G60690 | Symbols: REV, IFL, IFL1 | REV (REVOLUTA); DNA binding / lipid binding / transcription factor | chr5:24397734-24401933 FORWARDnearly identical (1296) loc_os03g01890 12003.m34764 protein rolled leaf1, putative, expressed seq=cds; coord=9:154642336..154650601:-1; parent_gene=GRMZM2G109987		0.507551
27.3.22	RNA.regulation of transcription.HB,Homeobox transcription factor family	ac196465.3_fgt006	Transcript	highly similar to ( 617) AT5G44180 | Symbols: | homeobox transcription factor, putative | chr5:17783172-17789872 FORWARDhighly similar to ( 873) loc_os01g48180 12001.m11010 protein DDT domain containing protein, expressed seq=cds; coord=8:149903000..149909521:1; parent_gene=AC196465.3_FG006		1.17403
27.3.22	RNA.regulation of transcription.HB,Homeobox transcription factor family	grmzm2g125294_t01	Transcript	highly similar to ( 929) AT5G44180 | Symbols: | homeobox transcription factor, putative | chr5:17783172-17789872 FORWARDnearly identical (1944) loc_os05g48820 12005.m08953 protein DDT domain containing protein, expressed seq=cds; coord=8:69119275..69131151:1; parent_gene=GRMZM2G125294			-0.473343
HSF
BinCode	BinName	id	type	description	ra1	ra2	ra3
27.3.23	RNA.regulation of transcription.HSF,Heat-shock transcription factor family	grmzm2g301485_t01	Transcript	weakly similar to ( 155) AT5G62020 | Symbols: AT-HSFB2A, HSFB2A | AT-HSFB2A; DNA binding / transcription factor | chr5:24916212-24917194 FORWARDmoderately similar to ( 248) loc_os04g48030 12004.m09743 protein heat shock factor protein 4, putative, expressed seq=cds; coord=10:137099306..137100682:-1; parent_gene=GRMZM2G301485	-1.0841	-1.09268
27.3.23	RNA.regulation of transcription.HSF,Heat-shock transcription factor family	grmzm2g025685_t01	Transcript	moderately similar to ( 201) AT1G46264 | Symbols: AT-HSFB4, HSFB4 | AT-HSFB4; DNA binding / transcription factor | chr1:17224904-17226183 FORWARDmoderately similar to ( 235) loc_os07g44690 12007.m08690 protein AT-HSFB4, putative, expressed seq=cds; coord=7:169173661..169177094:1; parent_gene=GRMZM2G025685	-0.553387
27.3.23	RNA.regulation of transcription.HSF,Heat-shock transcription factor family	grmzm2g027640_t01	Transcript	moderately similar to ( 234) AT4G17600 | Symbols: LIL3:1 | LIL3:1; transcription factor | chr4:9803759-9804714 FORWARDmoderately similar to ( 301) loc_os02g03330 12002.m05683 protein lil3 protein, putative, expressed seq=cds; coord=4:238744350..238745606:1; parent_gene=GRMZM2G027640			1.01035
27.3.23	RNA.regulation of transcription.HSF,Heat-shock transcription factor family	grmzm2g173090_t01	Transcript	weakly similar to ( 139) AT2G26150 | Symbols: ATHSFA2, HSFA2 | ATHSFA2; DNA binding / transcription factor | chr2:11136052-11137217 FORWARDweakly similar to ( 157) loc_os06g36930 12006.m08228 protein heat shock factor protein HSF30, putative seq=cds; coord=9:58450214..58451687:1; parent_gene=GRMZM2G173090			4.17847
27.3.23	RNA.regulation of transcription.HSF,Heat-shock transcription factor family	grmzm2g477236_t01	Transcript	moderately similar to ( 243) AT4G17600 | Symbols: LIL3:1 | LIL3:1; transcription factor | chr4:9803759-9804714 FORWARDmoderately similar to ( 306) loc_os02g03330 12002.m05683 protein lil3 protein, putative, expressed seq=cds; coord=5:73130941..73133246:1; parent_gene=GRMZM2G477236			0.612074
27.3.23	RNA.regulation of transcription.HSF,Heat-shock transcription factor family	grmzm2g105348_t01	Transcript	weakly similar to ( 189) AT3G24520 | Symbols: AT-HSFC1, HSFC1 | AT-HSFC1; DNA binding / transcription factor | chr3:8941455-8942531 FORWARDmoderately similar to ( 274) loc_os02g13800 12002.m06626 protein heat shock factor protein 1, putative, expressed seq=cds; coord=5:150189676..150191211:-1; parent_gene=GRMZM2G105348			1.20648
LOB
BinCode	BinName	id	type	description	ra1	ra2	ra3
27.3.37	RNA.regulation of transcription.AS2,Lateral Organ Boundaries Gene Family	ac233943.1_fgt002	Transcript	moderately similar to ( 209) AT5G63090 | Symbols: LOB | LOB (LATERAL ORGAN BOUNDARIES) | chr5:25308723-25309283 REVERSEmoderately similar to ( 327) loc_os01g07480 12001.m42608 protein ramosa 2, putative, expressed seq=cds; coord=3:12882491..12883276:1; parent_gene=AC233943.1_FG002	-0.790935
27.3.37	RNA.regulation of transcription.AS2,Lateral Organ Boundaries Gene Family	grmzm2g073044_t01	Transcript	weakly similar to ( 176) AT3G02550 | Symbols: LBD41 | LBD41 (LOB DOMAIN-CONTAINING PROTEIN 41) | chr3:536747-537650 REVERSEmoderately similar to ( 237) loc_os01g32770 12001.m09596 protein seed specific protein Bn15D17A, putative, expressed seq=cds; coord=8:123469338..123470737:-1; parent_gene=GRMZM2G073044	-0.703621
27.3.37	RNA.regulation of transcription.AS2,Lateral Organ Boundaries Gene Family	grmzm2g079185_t01	Transcript	weakly similar to ( 120) AT1G31320 | Symbols: LBD4 | LBD4 (LOB DOMAIN-CONTAINING PROTEIN 4) | chr1:11213107-11214032 FORWARDweakly similar to ( 180) loc_os03g45750 12003.m09600 protein LOB domain protein 12, putative, expressed seq=cds; coord=5:15187010..15189734:-1; parent_gene=GRMZM2G079185	-1.18109
27.3.37	RNA.regulation of transcription.AS2,Lateral Organ Boundaries Gene Family	grmzm2g177110_t01	Transcript	weakly similar to ( 181) AT5G67420 | Symbols: LBD37 | LBD37 (LOB DOMAIN-CONTAINING PROTEIN 37) | chr5:26904576-26905415 REVERSEmoderately similar to ( 244) loc_os07g40000 12007.m08242 protein seed specific protein Bn15D17A, putative, expressed seq=cds; coord=2:208854344..208855480:1; parent_gene=GRMZM2G177110	-0.653134		1.02662
27.3.37	RNA.regulation of transcription.AS2,Lateral Organ Boundaries Gene Family	grmzm2g447176_t01	Transcript	weakly similar to ( 117) AT1G31320 | Symbols: LBD4 | LBD4 (LOB DOMAIN-CONTAINING PROTEIN 4) | chr1:11213107-11214032 FORWARDweakly similar to ( 150) loc_os03g45750 12003.m09600 protein LOB domain protein 12, putative, expressed seq=cds; coord=1:258807220..258808683:-1; parent_gene=GRMZM2G447176	-1.96559
27.3.37	RNA.regulation of transcription.AS2,Lateral Organ Boundaries Gene Family	grmzm2g386674_t01	Transcript	weakly similar to ( 160) AT3G02550 | Symbols: LBD41 | LBD41 (LOB DOMAIN-CONTAINING PROTEIN 41) | chr3:536747-537650 REVERSEmoderately similar to ( 220) loc_os01g32770 12001.m09596 protein seed specific protein Bn15D17A, putative, expressed seq=cds; coord=6:159117664..159118989:-1; parent_gene=GRMZM2G386674		1.03139	1.00361
27.3.37	RNA.regulation of transcription.AS2,Lateral Organ Boundaries Gene Family	grmzm2g044902_t01	Transcript	weakly similar to ( 123) AT5G67420 | Symbols: LBD37 | LBD37 (LOB DOMAIN-CONTAINING PROTEIN 37) | chr5:26904576-26905415 REVERSEweakly similar to ( 160) loc_os03g33090 12003.m08552 protein seed specific protein Bn15D17A, putative, expressed seq=cds; coord=1:77144729..77146171:-1; parent_gene=GRMZM2G044902			0.802785
MADS
BinCode	BinName	id	type	description	ra1	ra2	ra3
27.3.24	RNA.regulation of transcription.MADS box transcription factor family	grmzm2g005155_t01	Transcript	weakly similar to ( 144) AT5G23260 | Symbols: TT16, ABS | TT16 (TRANSPARENT TESTA16); transcription factor | chr5:7836442-7838340 FORWARDmoderately similar to ( 274) MAD31_ORYSA MADS-box transcription factor 31 (OsMADS31) - Oryza sativa (Rice)moderately similar to ( 274) loc_os04g52410 12004.m10135 protein MADS-box transcription factor 31, putative, expressed seq=cds; coord=2:10365839..10368580:-…	-0.685167	-0.846038	-0.673581
27.3.24	RNA.regulation of transcription.MADS box transcription factor family	grmzm5g891280_t01	Transcript	weakly similar to ( 104) AT2G24840 | Symbols: AGL61, DIA | AGL61 (AGAMOUS-LIKE 61); DNA binding / transcription factor | chr2:10581082-10581876 FORWARDvery weakly similar to (83.2) MAD47_ORYSA MADS-box transcription factor 47 (OsMADS47) - Oryza sativa (Rice)weakly similar to ( 174) loc_os09g02830 12009.m03655 protein DNA binding protein, putative seq=cds; coord=6:165537902..165538852:-1; parent_g…	-1.6302
27.3.24	RNA.regulation of transcription.MADS box transcription factor family	grmzm5g805387_t01	Transcript	weakly similar to ( 145) AT5G20240 | Symbols: PI | PI (PISTILLATA); DNA binding / transcription factor | chr5:6829203-6831208 FORWARDweakly similar to ( 194) MADS2_ORYSA MADS-box transcription factor 2 (OsMADS2) (RMADS219) (NMADS1) - Oryza sativa (Rice)weakly similar to ( 194) loc_os01g66030 12001.m43312 protein MADS-box transcription factor 2, putative, expressed seq=cds; coord=8:103019809..1030…	4.0572		3.11459
27.3.24	RNA.regulation of transcription.MADS box transcription factor family	ac234185.1_fgt006	Transcript	weakly similar to ( 102) AT5G60440 | Symbols: AGL62 | AGL62 (Agamous-like 62); DNA binding / transcription factor | chr5:24306329-24307520 FORWARDvery weakly similar to (83.2) AGL15_BRANA Agamous-like MADS-box protein AGL15 - Brassica napus (Rape)weakly similar to ( 175) loc_os01g74440 12001.m13469 protein DNA binding protein, putative seq=cds; coord=8:72654033..72654779:-1; parent_gene=AC234185.…	-1.56534
27.3.24	RNA.regulation of transcription.MADS box transcription factor family	grmzm2g026223_t01	Transcript	weakly similar to ( 185) AT2G45660 | Symbols: AGL20, SOC1 | AGL20 (AGAMOUS-LIKE 20); transcription factor | chr2:18807799-18810193 REVERSEmoderately similar to ( 258) MAD50_ORYSA MADS-box transcription factor 50 (OsMADS50) (Protein SUPPRESSOR OF CONSTANS OVEREXPRESSION 1-like) (OsSOC1) (Protein AGAMOUS-like 20) (RMADS208) - Oryza sativa (Rice)moderately similar to ( 209) loc_os10g39130 12010.m219…	-0.335612
27.3.24	RNA.regulation of transcription.MADS box transcription factor family	grmzm2g105387_t01	Transcript	weakly similar to ( 105) AT1G71692 | Symbols: AGL12, XAL1 | AGL12 (AGAMOUS-LIKE 12); transcription factor | chr1:26952903-26954939 REVERSEweakly similar to ( 118) MAD26_ORYSA MADS-box transcription factor 26 (OsMADS26) (FDRMADS3) (RMADS220) - Oryza sativa (Rice)weakly similar to ( 118) loc_os08g02070 12008.m04353 protein MADS-box transcription factor 26, putative, expressed seq=cds; coord=4:38758…	1.42442
27.3.24	RNA.regulation of transcription.MADS box transcription factor family	grmzm2g033093_t01	Transcript	very weakly similar to (96.3) AT3G57230 | Symbols: AGL16 | AGL16 (AGAMOUS-LIKE 16); transcription factor | chr3:21177710-21180671 FORWARDweakly similar to ( 151) MAD27_ORYSA MADS-box transcription factor 27 (OsMADS27) (RMADS218) - Oryza sativa (Rice)weakly similar to ( 173) loc_os04g38780 12004.m08867 protein MADS-box transcription factor 27, putative, expressed seq=cds; coord=2:41732663..4173665…		1.61276
27.3.24	RNA.regulation of transcription.MADS box transcription factor family	grmzm2g046885_t01	Transcript	weakly similar to ( 194) AT2G22540 | Symbols: SVP, AGL22 | SVP (SHORT VEGETATIVE PHASE); transcription factor/ translation repressor, nucleic acid binding | chr2:9580417-9583603 FORWARDmoderately similar to ( 317) MAD22_ORYSA MADS-box transcription factor 22 (OsMADS22) - Oryza sativa (Rice)moderately similar to ( 317) loc_os02g52340 12002.m10265 protein MADS-box transcription factor 22, putative,…			1.47706
27.3.24	RNA.regulation of transcription.MADS box transcription factor family	grmzm2g059102_t01	Transcript	moderately similar to ( 222) AT2G22540 | Symbols: SVP, AGL22 | SVP (SHORT VEGETATIVE PHASE); transcription factor/ translation repressor, nucleic acid binding | chr2:9580417-9583603 FORWARDmoderately similar to ( 330) MAD47_ORYSA MADS-box transcription factor 47 (OsMADS47) - Oryza sativa (Rice)moderately similar to ( 345) loc_os03g08754 12003.m35564 protein MADS-box transcription factor 47, putat…			1.49634
27.3.24	RNA.regulation of transcription.MADS box transcription factor family	grmzm2g071620_t01	Transcript	moderately similar to ( 230) AT5G15800 | Symbols: SEP1, AGL2 | SEP1 (SEPALLATA1); DNA binding / transcription factor | chr5:5151594-5153767 REVERSEmoderately similar to ( 364) MAD34_ORYSA MADS-box transcription factor 34 (OsMADS34) (RMADS212/RMADS217/RMADS221) - Oryza sativa (Rice)moderately similar to ( 364) loc_os03g54170 12003.m10383 protein MADS-box transcription factor 34, putative, expresse…			0.978602
27.3.24	RNA.regulation of transcription.MADS box transcription factor family	grmzm2g370777_t01	Transcript	weakly similar to ( 190) AT2G22540 | Symbols: SVP, AGL22 | SVP (SHORT VEGETATIVE PHASE); transcription factor/ translation repressor, nucleic acid binding | chr2:9580417-9583603 FORWARDmoderately similar to ( 308) MAD22_ORYSA MADS-box transcription factor 22 (OsMADS22) - Oryza sativa (Rice)moderately similar to ( 308) loc_os02g52340 12002.m10265 protein MADS-box transcription factor 22, putative,…			1.31836
27.3.24	RNA.regulation of transcription.MADS box transcription factor family	grmzm2g117961_t01	Transcript	weakly similar to ( 199) AT1G71692 | Symbols: AGL12, XAL1 | AGL12 (AGAMOUS-LIKE 12); transcription factor | chr1:26952903-26954939 REVERSEmoderately similar to ( 369) MAD26_ORYSA MADS-box transcription factor 26 (OsMADS26) (FDRMADS3) (RMADS220) - Oryza sativa (Rice)moderately similar to ( 369) loc_os08g02070 12008.m04353 protein MADS-box transcription factor 26, putative, expressed seq=cds; coord…			2.018
MYB
BinCode	BinName	id	type	description	ra1	ra2	ra3
27.3.25	RNA.regulation of transcription.MYB domain transcription factor family	grmzm2g083239_t01	Transcript	weakly similar to ( 191) AT1G69560 | Symbols: MYB105, AtMYB105 | MYB105 (myb domain protein 105); DNA binding / transcription factor | chr1:26157755-26158906 FORWARDvery weakly similar to (98.2) GAM1_ORYSA Transcription factor GAMYB (OsGAMyb) - Oryza sativa (Rice)moderately similar to ( 204) loc_os01g16810 12001.m08277 protein DNA binding protein, putative, expressed seq=cds; coord=3:43407032..43…	-1.02007
27.3.25	RNA.regulation of transcription.MYB domain transcription factor family	grmzm2g098179_t01	Transcript	moderately similar to ( 240) AT3G47600 | Symbols: MYB94, ATMYBCP70, ATMYB94 | ATMYB94 (MYB DOMAIN PROTEIN 94); DNA binding / transcription factor | chr3:17539627-17541035 REVERSEweakly similar to ( 177) MYB4_ORYSA Myb-related protein Myb4 (OsMyb4) (Transcription factor RLTR1) - Oryza sativa (Rice)moderately similar to ( 292) loc_os03g26130 12003.m07957 protein myb transcription factor MYB30, puta…	-1.26679
27.3.25	RNA.regulation of transcription.MYB domain transcription factor family	grmzm2g405094_t01	Transcript	moderately similar to ( 266) AT4G38620 | Symbols: ATMYB4, MYB4 | MYB4; DNA binding / transcription factor | chr4:18053866-18054876 FORWARDmoderately similar to ( 273) MYB38_MAIZE Myb-related protein Zm38 - Zea mays (Maize)moderately similar to ( 325) loc_os01g65370 12001.m12650 protein transcription repressor MYB4, putative seq=cds; coord=8:165875616..165876842:-1; parent_gene=GRMZM2G405094	-1.15499
27.3.25	RNA.regulation of transcription.MYB domain transcription factor family	grmzm2g147346_t01	Transcript	moderately similar to ( 209) AT1G06180 | Symbols: ATMYB13, ATMYBLFGN | ATMYB13 (MYB DOMAIN PROTEIN 13); DNA binding / transcription factor | chr1:1889510-1891089 FORWARDmoderately similar to ( 219) MYB4_ORYSA Myb-related protein Myb4 (OsMyb4) (Transcription factor RLTR1) - Oryza sativa (Rice)moderately similar to ( 283) loc_os10g33810 12010.m06210 protein myb-related protein Myb4, putative, expre…	-0.726509
27.3.25	RNA.regulation of transcription.MYB domain transcription factor family	grmzm2g056407_t01	Transcript	moderately similar to ( 270) AT3G28910 | Symbols: ATMYB30, MYB30 | MYB30 (MYB DOMAIN PROTEIN 30); DNA binding / transcription factor | chr3:10911443-10912856 FORWARDweakly similar to ( 193) MYB4_ORYSA Myb-related protein Myb4 (OsMyb4) (Transcription factor RLTR1) - Oryza sativa (Rice)moderately similar to ( 353) loc_os07g43580 12007.m08585 protein MYB94, putative, expressed seq=cds; coord=7:16760…	-0.592578		0.909417
27.3.25	RNA.regulation of transcription.MYB domain transcription factor family	grmzm2g123202_t01	Transcript	moderately similar to ( 204) AT3G61250 | Symbols: AtMYB17 | AtMYB17 (myb domain protein 17); DNA binding / transcription factor | chr3:22671306-22672551 FORWARDweakly similar to ( 182) MYB4_ORYSA Myb-related protein Myb4 (OsMyb4) (Transcription factor RLTR1) - Oryza sativa (Rice)moderately similar to ( 288) loc_os04g45060 12004.m09460 protein MYB14, putative seq=cds; coord=2:22997838..22999590:-1…	-0.747489
27.3.25	RNA.regulation of transcription.MYB domain transcription factor family	grmzm2g124715_t01	Transcript	moderately similar to ( 260) AT4G38620 | Symbols: ATMYB4, MYB4 | MYB4; DNA binding / transcription factor | chr4:18053866-18054876 FORWARDmoderately similar to ( 255) MYB1_HORVU Myb-related protein Hv1 - Hordeum vulgare (Barley)moderately similar to ( 290) loc_os11g07890 12011.m04985 protein transposon protein, putative, CACTA, En/Spm sub-class seq=cds; coord=2:131348486..131350096:-1; parent_gen…	-0.950228
27.3.25	RNA.regulation of transcription.MYB domain transcription factor family	grmzm2g480380_t01	Transcript	moderately similar to ( 296) AT1G10330 | Symbols: | pentatricopeptide (PPR) repeat-containing protein | chr1:3388747-3390150 FORWARDhighly similar to ( 543) loc_os05g18950 12005.m06299 protein methyltransferase small domain, putative, expressed seq=cds; coord=3:86901385..86902872:-1; parent_gene=GRMZM2G480380	-1.00982
27.3.25	RNA.regulation of transcription.MYB domain transcription factor family	grmzm2g104551_t01	Transcript	moderately similar to ( 267) AT4G22680 | Symbols: MYB85, AtMYB85 | MYB85 (myb domain protein 85); DNA binding / transcription activator/ transcription factor | chr4:11922789-11924080 REVERSEmoderately similar to ( 283) ODO1_PETHY ODORANT1 protein (MYB-like protein ODO1) - Petunia hybrida (Petunia)moderately similar to ( 412) loc_os09g36250 12009.m06574 protein odorant 1 protein, putative, express…	-0.531056
27.3.25	RNA.regulation of transcription.MYB domain transcription factor family	grmzm2g079925_t01	Transcript	moderately similar to ( 273) AT5G66500 | Symbols: | pentatricopeptide (PPR) repeat-containing protein | chr5:26548076-26549674 REVERSEhighly similar to ( 533) loc_os03g42650 12003.m35318 protein vegetative storage protein, putative, expressed seq=cds; coord=10:60154578..60156011:1; parent_gene=GRMZM2G079925	-1.12286
27.3.25	RNA.regulation of transcription.MYB domain transcription factor family	grmzm2g428555_t01	Transcript	moderately similar to ( 225) AT1G26780 | Symbols: MYB117, AtMYB117 | myb family transcription factor (MYB117) | chr1:9271033-9272463 FORWARDvery weakly similar to (98.2) MYB1_MAIZE Myb-related protein Zm1 - Zea mays (Maize)moderately similar to ( 294) loc_os08g33800 12008.m07370 protein myb-like DNA-binding domain containing protein seq=cds; coord=1:213535696..213537529:1; parent_gene=GRMZM2G4285…	-0.861805
27.3.25	RNA.regulation of transcription.MYB domain transcription factor family	grmzm2g162709_t01	Transcript	moderately similar to ( 243) AT1G68320 | Symbols: MYB62, AtMYB62, BW62B, BW62C | MYB62 (myb domain protein 62); DNA binding / transcription factor | chr1:25603842-25604884 FORWARDweakly similar to ( 159) MYBA2_ORYSA Myb-related protein MYBAS2 - Oryza sativa (Rice)moderately similar to ( 305) loc_os01g03720 12001.m07009 protein MYB transcription factor, putative, expressed seq=cds; coord=3:2368334…	-1.02129
27.3.25	RNA.regulation of transcription.MYB domain transcription factor family	grmzm2g050305_t01	Transcript	moderately similar to ( 291) AT4G38620 | Symbols: ATMYB4, MYB4 | MYB4; DNA binding / transcription factor | chr4:18053866-18054876 FORWARDmoderately similar to ( 386) MYB1_HORVU Myb-related protein Hv1 - Hordeum vulgare (Barley)moderately similar to ( 398) loc_os09g36730 12009.m06622 protein myb-related protein Hv1, putative, expressed seq=cds; coord=2:196293689..196295310:-1; parent_gene=GRMZM2G…	-0.803015
27.3.25	RNA.regulation of transcription.MYB domain transcription factor family	grmzm2g126566_t01	Transcript	moderately similar to ( 260) AT1G66230 | Symbols: MYB20, AtMYB20 | MYB20 (myb domain protein 20); DNA binding / transcription factor | chr1:24677322-24678246 FORWARDmoderately similar to ( 248) ODO1_PETHY ODORANT1 protein (MYB-like protein ODO1) - Petunia hybrida (Petunia)moderately similar to ( 297) loc_os09g23620 12009.m05519 protein odorant 1 protein, putative, expressed seq=cds; coord=7:10878…	-2.51343
27.3.25	RNA.regulation of transcription.MYB domain transcription factor family	grmzm2g403620_t01	Transcript	moderately similar to ( 220) AT2G37630 | Symbols: ATPHAN, AS1, ATMYB91, MYB91 | AS1 (ASYMMETRIC LEAVES 1); DNA binding / protein homodimerization/ transcription factor | chr2:15781798-15782901 REVERSEvery weakly similar to (97.4) GAM1_ORYSA Transcription factor GAMYB (OsGAMyb) - Oryza sativa (Rice)moderately similar to ( 226) loc_os12g38400 12012.m26938 protein protein ASYMMETRIC LEAVES1, putativ…	-1.29383	-0.395263
27.3.25	RNA.regulation of transcription.MYB domain transcription factor family	grmzm2g160838_t01	Transcript	moderately similar to ( 255) AT4G38620 | Symbols: ATMYB4, MYB4 | MYB4; DNA binding / transcription factor | chr4:18053866-18054876 FORWARDmoderately similar to ( 263) MYB38_MAIZE Myb-related protein Zm38 - Zea mays (Maize)moderately similar to ( 356) loc_os01g65370 12001.m12650 protein transcription repressor MYB4, putative seq=cds; coord=3:173520271..173521619:-1; parent_gene=GRMZM2G160838	-0.818348
27.3.25	RNA.regulation of transcription.MYB domain transcription factor family	grmzm2g111045_t01	Transcript	moderately similar to ( 226) AT3G61250 | Symbols: AtMYB17 | AtMYB17 (myb domain protein 17); DNA binding / transcription factor | chr3:22671306-22672551 FORWARDweakly similar to ( 195) MYB4_ORYSA Myb-related protein Myb4 (OsMyb4) (Transcription factor RLTR1) - Oryza sativa (Rice)moderately similar to ( 358) loc_os02g42870 12002.m09322 protein P-type R2R3 Myb protein, putative, expressed seq=cds; …	-0.591495
27.3.25	RNA.regulation of transcription.MYB domain transcription factor family	grmzm2g431156_t01	Transcript	moderately similar to ( 251) AT4G38620 | Symbols: ATMYB4, MYB4 | MYB4; DNA binding / transcription factor | chr4:18053866-18054876 FORWARDmoderately similar to ( 251) MYB38_MAIZE Myb-related protein Zm38 - Zea mays (Maize)moderately similar to ( 263) loc_os05g35500 12005.m07780 protein mybHv5, putative, expressed seq=cds; coord=8:101774702..101775500:-1; parent_gene=GRMZM2G431156	-0.950701
27.3.25	RNA.regulation of transcription.MYB domain transcription factor family	ac165178.2_fgt004	Transcript	moderately similar to ( 284) AT3G47600 | Symbols: MYB94, ATMYBCP70, ATMYB94 | ATMYB94 (MYB DOMAIN PROTEIN 94); DNA binding / transcription factor | chr3:17539627-17541035 REVERSEweakly similar to ( 190) MYB4_ORYSA Myb-related protein Myb4 (OsMyb4) (Transcription factor RLTR1) - Oryza sativa (Rice)moderately similar to ( 379) loc_os08g33940 12008.m07384 protein MYB96, putative, expressed seq=cds; …	-1.07939		0.955269
27.3.25	RNA.regulation of transcription.MYB domain transcription factor family	grmzm2g471039_t01	Transcript	very weakly similar to (82.0) AT3G47680 | Symbols: | DNA binding | chr3:17577483-17578391 REVERSEweakly similar to ( 119) loc_os09g14260 12009.m04688 protein transposon protein, putative, CACTA, En/Spm sub-class seq=cds; coord=2:44193630..44195023:1; parent_gene=GRMZM2G471039	-0.955001	-0.604029
27.3.25	RNA.regulation of transcription.MYB domain transcription factor family	grmzm2g001106_t01	Transcript	weakly similar to ( 127) AT4G28110 | Symbols: AtMYB41 | AtMYB41 (myb domain protein 41); DNA binding / transcription factor | chr4:13968166-13969384 REVERSEweakly similar to ( 119) MYB4_ORYSA Myb-related protein Myb4 (OsMyb4) (Transcription factor RLTR1) - Oryza sativa (Rice)weakly similar to ( 145) loc_os02g42870 12002.m09322 protein P-type R2R3 Myb protein, putative, expressed seq=cds; coord=10…	-1.00114
27.3.25	RNA.regulation of transcription.MYB domain transcription factor family	grmzm2g312419_t01	Transcript	weakly similar to ( 178) AT1G26780 | Symbols: MYB117, AtMYB117 | myb family transcription factor (MYB117) | chr1:9271033-9272463 FORWARDvery weakly similar to (82.4) MYBA1_ORYSA Myb-related protein MYBAS1 - Oryza sativa (Rice)moderately similar to ( 209) loc_os01g16810 12001.m08277 protein DNA binding protein, putative, expressed seq=cds; coord=8:2761693..2763484:-1; parent_gene=GRMZM2G312419	-0.963841		1.01942
27.3.25	RNA.regulation of transcription.MYB domain transcription factor family	grmzm2g171994_t01	Transcript	moderately similar to ( 408) AT5G48910 | Symbols: | pentatricopeptide (PPR) repeat-containing protein | chr5:19832969-19834909 REVERSEvery weakly similar to (82.8) RF1_ORYSA Rf1 protein, mitochondrial precursor (PPR protein) (Fertility restorer) (Restorer for CMS) - Oryza sativa (Rice)moderately similar to ( 426) loc_os02g34700 12002.m08559 protein selenium-binding protein-like, putative seq=cds;…	-0.810452
27.3.25	RNA.regulation of transcription.MYB domain transcription factor family	grmzm2g111731_t01	Transcript	moderately similar to ( 202) AT1G26780 | Symbols: MYB117, AtMYB117 | myb family transcription factor (MYB117) | chr1:9271033-9272463 FORWARDvery weakly similar to (94.7) GAM1_ORYSA Transcription factor GAMYB (OsGAMyb) - Oryza sativa (Rice)moderately similar to ( 241) loc_os01g16810 12001.m08277 protein DNA binding protein, putative, expressed seq=cds; coord=3:43359107..43360826:-1; parent_gene=GR…	-0.939098
27.3.25	RNA.regulation of transcription.MYB domain transcription factor family	grmzm2g448104_t01	Transcript	moderately similar to ( 225) AT3G21430 | Symbols: ATALY3, ALY3 | DNA binding | chr3:7544800-7552841 REVERSEmoderately similar to ( 479) loc_os03g43800 12003.m35327 protein always early protein 3, putative, expressed seq=cds; coord=10:143511980..143538917:-1; parent_gene=GRMZM2G448104		0.663198
27.3.25	RNA.regulation of transcription.MYB domain transcription factor family	grmzm2g464575_t01	Transcript	weakly similar to ( 177) AT1G26580 | Symbols: | FUNCTIONS IN: molecular_function unknown; INVOLVED IN: biological_process unknown; LOCATED IN: cellular_component unknown; EXPRESSED IN: 24 plant structures; EXPRESSED DURING: 15 growth stages; BEST Arabidopsis thaliana protein match is: myb family transcription factor / ELM2 domain-containing protein (TAIR:AT2G03470.1); Has 82 Blast hits to 82 prot…		1.04006
27.3.25	RNA.regulation of transcription.MYB domain transcription factor family	grmzm2g531738_t01	Transcript	moderately similar to ( 285) AT5G11510 | Symbols: MYB3R-4 | MYB3R-4 (myb domain protein 3R-4); DNA binding / transcription coactivator/ transcription factor | chr5:3680452-3683633 FORWARDhighly similar to ( 657) loc_os12g13570 12012.m05329 protein myb, putative, expressed seq=cds; coord=6:135139113..135148846:1; parent_gene=GRMZM2G531738		1.61576	0.836944
27.3.25	RNA.regulation of transcription.MYB domain transcription factor family	grmzm2g081919_t01	Transcript	moderately similar to ( 347) AT5G02320 | Symbols: ATMYB3R5, MYB3R-5 | MYB3R-5 (MYB DOMAIN PROTEIN 3R-5); DNA binding / transcription factor | chr5:483445-486347 REVERSEweakly similar to ( 120) GAM1_ORYSA Transcription factor GAMYB (OsGAMyb) - Oryza sativa (Rice)highly similar to ( 702) loc_os01g62410 12001.m42752 protein myb-like DNA-binding domain containing protein, expressed seq=cds; coord=3:1…		0.789827	0.650514
27.3.25	RNA.regulation of transcription.MYB domain transcription factor family	grmzm2g062230_t01	Transcript	weakly similar to ( 177) AT2G36960 | Symbols: TKI1 | TKI1 (TSL-kinase interacting protein 1); DNA binding / transcription factor | chr2:15523552-15527245 FORWARDmoderately similar to ( 476) loc_os01g08680 12001.m150498 protein expressed protein seq=cds; coord=3:9314893..9319220:1; parent_gene=GRMZM2G062230		0.99627	0.846525
27.3.25	RNA.regulation of transcription.MYB domain transcription factor family	grmzm2g042548_t01	Transcript	very weakly similar to (93.2) AT3G47680 | Symbols: | DNA binding | chr3:17577483-17578391 REVERSEmoderately similar to ( 356) loc_os11g14160 12011.m05553 protein transposon protein, putative, Pong sub-class, expressed seq=cds; coord=3:198566641..198569108:-1; parent_gene=GRMZM2G042548		0.970018
27.3.25	RNA.regulation of transcription.MYB domain transcription factor family	grmzm2g460988_t01	Transcript	moderately similar to ( 387) AT4G21300 | Symbols: | pentatricopeptide (PPR) repeat-containing protein | chr4:11336479-11339052 FORWARDvery weakly similar to (93.6) RF1_ORYSA Rf1 protein, mitochondrial precursor (PPR protein) (Fertility restorer) (Restorer for CMS) - Oryza sativa (Rice)nearly identical (1065) loc_os01g25530 12001.m09016 protein pentatricopeptide repeat protein PPR986-12, putative,…		1.34388
27.3.25	RNA.regulation of transcription.MYB domain transcription factor family	grmzm2g104255_t01	Transcript	weakly similar to ( 111) AT2G36960 | Symbols: TKI1 | TKI1 (TSL-kinase interacting protein 1); DNA binding / transcription factor | chr2:15523552-15527245 FORWARDmoderately similar to ( 368) loc_os03g13790 12003.m101263 protein TKI1, putative, expressed seq=cds; coord=1:32401931..32403356:1; parent_gene=GRMZM2G104255		1.21158	1.35714
27.3.25	RNA.regulation of transcription.MYB domain transcription factor family	grmzm2g064630_t01	Transcript	moderately similar to ( 265) AT1G14350 | Symbols: FLP, MYB124 | FLP (FOUR LIPS); DNA binding / transcription factor | chr1:4908427-4910647 FORWARDvery weakly similar to (85.1) MYB4_ORYSA Myb-related protein Myb4 (OsMyb4) (Transcription factor RLTR1) - Oryza sativa (Rice)highly similar to ( 573) loc_os07g43420 12007.m08570 protein myb, DNA-binding, putative, expressed seq=cds; coord=2:212636454..2…		1.57525	1.29008
27.3.25	RNA.regulation of transcription.MYB domain transcription factor family	grmzm2g117244_t01	Transcript	moderately similar to ( 208) AT5G57620 | Symbols: MYB36, AtMYB36 | MYB36 (myb domain protein 36); DNA binding / transcription factor | chr5:23334904-23336388 FORWARDweakly similar to ( 156) MYB4_ORYSA Myb-related protein Myb4 (OsMyb4) (Transcription factor RLTR1) - Oryza sativa (Rice)moderately similar to ( 295) loc_os09g26170 12009.m05769 protein MYB36, putative, expressed seq=cds; coord=7:11890…			3.15766
27.3.25	RNA.regulation of transcription.MYB domain transcription factor family	grmzm2g078820_t01	Transcript	weakly similar to ( 155) AT5G67300 | Symbols: ATMYBR1, ATMYB44, MYBR1 | MYBR1 (MYB DOMAIN PROTEIN R1); DNA binding / transcription factor | chr5:26854109-26855026 FORWARDvery weakly similar to ( 100) MYB4_ORYSA Myb-related protein Myb4 (OsMyb4) (Transcription factor RLTR1) - Oryza sativa (Rice)weakly similar to ( 190) loc_os02g09480 12002.m06245 protein MYB transcription factor TaMYB1, putative, …			1.24906
27.3.25	RNA.regulation of transcription.MYB domain transcription factor family	grmzm2g006763_t01	Transcript	moderately similar to ( 449) AT5G42450 | Symbols: | pentatricopeptide (PPR) repeat-containing protein | chr5:16977660-16978850 FORWARDvery weakly similar to (90.1) RF1_ORYSA Rf1 protein, mitochondrial precursor (PPR protein) (Fertility restorer) (Restorer for CMS) - Oryza sativa (Rice)highly similar to ( 760) loc_os01g62220 12001.m12345 protein tetratricopeptide-like helical, putative seq=cds; co…			1.18808
27.3.25	RNA.regulation of transcription.MYB domain transcription factor family	grmzm2g093789_t01	Transcript	weakly similar to ( 170) AT2G26960 | Symbols: AtMYB81 | AtMYB81 (myb domain protein 81); DNA binding / transcription factor | chr2:11506065-11507425 REVERSEweakly similar to ( 176) GAM1_ORYSA Transcription factor GAMYB (OsGAMyb) - Oryza sativa (Rice)moderately similar to ( 229) loc_os06g40330 12006.m08569 protein myb-like DNA-binding domain containing protein, expressed seq=cds; coord=6:89240540.…			0.83458
27.3.25	RNA.regulation of transcription.MYB domain transcription factor family	grmzm2g100431_t01	Transcript	weakly similar to ( 191) AT2G03470 | Symbols: | myb family transcription factor / ELM2 domain-containing protein | chr2:1045694-1047130 REVERSEweakly similar to ( 200) loc_os03g31230 12003.m35283 protein DNA binding protein, putative, expressed seq=cds; coord=9:147292024..147294766:-1; parent_gene=GRMZM2G100431			0.925105
27.3.25	RNA.regulation of transcription.MYB domain transcription factor family	grmzm5g877874_t01	Transcript	weakly similar to ( 107) loc_os05g46330 12005.m08758 protein DNA methyltransferase 1-associated protein 1, putative, expressed seq=cds; coord=5:114735675..114738142:-1; parent_gene=GRMZM5G877874			1.00168
27.3.25	RNA.regulation of transcription.MYB domain transcription factor family	grmzm2g073826_t01	Transcript	very weakly similar to (91.3) AT5G11510 | Symbols: MYB3R-4 | MYB3R-4 (myb domain protein 3R-4); DNA binding / transcription coactivator/ transcription factor | chr5:3680452-3683633 FORWARDweakly similar to ( 113) loc_os02g17190 12002.m06962 protein myb-like DNA-binding domain containing protein, expressed seq=cds; coord=5:135301776..135303063:1; parent_gene=GRMZM2G073826			1.04111
27.3.25	RNA.regulation of transcription.MYB domain transcription factor family	grmzm2g305856_t01	Transcript	weakly similar to ( 179) AT3G46130 | Symbols: MYB111, PFG3, ATMYB48-2 | MYB111 (MYB DOMAIN PROTEIN 111); DNA binding / transcription factor | chr3:16945465-16946376 FORWARDweakly similar to ( 183) MYBA2_ORYSA Myb-related protein MYBAS2 - Oryza sativa (Rice)weakly similar to ( 186) loc_os01g74410 12001.m13467 protein MYB59, putative, expressed seq=cds; coord=6:34889003..34890365:-1; parent_gene=GR…			-1.42007
27.3.25	RNA.regulation of transcription.MYB domain transcription factor family	grmzm2g309624_t01	Transcript	moderately similar to ( 470) loc_os11g06190 12011.m04816 protein expressed protein seq=cds; coord=5:235289..239277:-1; parent_gene=GRMZM2G309624			1.07426
MYB-related
BinCode	BinName	id	type	description	ra1	ra2	ra3
27.3.26	RNA.regulation of transcription.MYB-related transcription factor family	grmzm2g002128_t01	Transcript	moderately similar to ( 240) AT2G38090 | Symbols: | myb family transcription factor | chr2:15945278-15946775 FORWARDmoderately similar to ( 377) loc_os05g37730 12005.m07952 protein MYB-like transcription factor DIVARICATA, putative, expressed seq=cds; coord=6:148827534..148829611:1; parent_gene=GRMZM2G002128	-0.90627
27.3.26	RNA.regulation of transcription.MYB-related transcription factor family	grmzm2g056986_t01	Transcript	moderately similar to ( 213) AT2G38090 | Symbols: | myb family transcription factor | chr2:15945278-15946775 FORWARDmoderately similar to ( 261) loc_os01g63460 12001.m12462 protein MYB transcription factor, putative, expressed seq=cds; coord=8:167454661..167455894:1; parent_gene=GRMZM2G056986	-1.17586
27.3.26	RNA.regulation of transcription.MYB-related transcription factor family	grmzm2g020772_t01	Transcript	weakly similar to ( 197) AT2G38090 | Symbols: | myb family transcription factor | chr2:15945278-15946775 FORWARDmoderately similar to ( 317) loc_os01g04930 12001.m07127 protein MYB-like transcription factor DIVARICATA, putative, expressed seq=cds; coord=3:18996740..18999259:1; parent_gene=GRMZM2G020772	-0.650608
27.3.26	RNA.regulation of transcription.MYB-related transcription factor family	grmzm5g813892_t01	Transcript	moderately similar to ( 277) AT5G47390 | Symbols: | myb family transcription factor | chr5:19227001-19228546 FORWARDmoderately similar to ( 419) loc_os10g41200 12010.m21804 protein ZmMybst1, putative, expressed seq=cds; coord=1:89439243..89442815:1; parent_gene=GRMZM5G813892		1.25116
27.3.26	RNA.regulation of transcription.MYB-related transcription factor family	grmzm2g176568_t01	Transcript	weakly similar to ( 143) AT5G58900 | Symbols: | myb family transcription factor | chr5:23783275-23784667 REVERSEweakly similar to ( 159) loc_os01g04930 12001.m07127 protein MYB-like transcription factor DIVARICATA, putative, expressed seq=cds; coord=8:13790035..13790848:-1; parent_gene=GRMZM2G176568		1.67062
NAC
BinCode	BinName	id	type	description	ra1	ra2	ra3
27.3.27	RNA.regulation of transcription.NAC domain transcription factor family	grmzm2g175782_t01	Transcript	moderately similar to ( 220) AT3G13000 | Symbols: | transcription factor | chr3:4158214-4160818 REVERSEmoderately similar to ( 378) loc_os06g47770 12006.m09303 protein expressed protein seq=cds; coord=6:88731217..88735225:1; parent_gene=GRMZM2G175782	0.623417
27.3.27	RNA.regulation of transcription.NAC domain transcription factor family	grmzm2g139700_t01	Transcript	moderately similar to ( 266) AT5G53950 | Symbols: CUC2, ANAC098 | CUC2 (CUP-SHAPED COTYLEDON 2); transcription factor | chr5:21901966-21903795 REVERSEweakly similar to ( 198) NAC77_ORYSA NAC domain-containing protein 77 (ONAC077) (ONAC300) - Oryza sativa (Rice)moderately similar to ( 380) loc_os06g23650 12006.m07017 protein CUC2, putative, expressed seq=cds; coord=3:137579039..137580848:1; parent…	-1.18076
27.3.27	RNA.regulation of transcription.NAC domain transcription factor family	grmzm2g134073_t01	Transcript	very weakly similar to (92.0) AT3G15510 | Symbols: ATNAC2, ANAC056, NARS1 | ATNAC2 (ARABIDOPSIS NAC DOMAIN CONTAINING PROTEIN 2); transcription factor | chr3:5243696-5245037 FORWARDweakly similar to ( 149) loc_os01g70110 12001.m13059 protein NAC domain-containing protein 68, putative, expressed seq=cds; coord=8:160424732..160426914:-1; parent_gene=GRMZM2G134073	-1.27075
27.3.27	RNA.regulation of transcription.NAC domain transcription factor family	grmzm2g393433_t01	Transcript	moderately similar to ( 262) AT5G53950 | Symbols: CUC2, ANAC098 | CUC2 (CUP-SHAPED COTYLEDON 2); transcription factor | chr5:21901966-21903795 REVERSEweakly similar to ( 196) NAC77_ORYSA NAC domain-containing protein 77 (ONAC077) (ONAC300) - Oryza sativa (Rice)moderately similar to ( 362) loc_os06g23650 12006.m07017 protein CUC2, putative, expressed seq=cds; coord=6:16291273..16293492:-1; parent_…	-1.31104
27.3.27	RNA.regulation of transcription.NAC domain transcription factor family	ac203535.4_fgt002	Transcript	very weakly similar to (97.8) AT3G04070 | Symbols: anac047 | anac047 (Arabidopsis NAC domain containing protein 47); transcription factor | chr3:1061573-1062976 REVERSEvery weakly similar to (91.7) NAC68_ORYSA NAC domain-containing protein 68 (ONAC068) - Oryza sativa (Rice)weakly similar to ( 180) loc_os01g70110 12001.m13059 protein NAC domain-containing protein 68, putative, expressed seq=cds; c…	-1.27241
27.3.27	RNA.regulation of transcription.NAC domain transcription factor family	grmzm2g083347_t01	Transcript	weakly similar to ( 140) AT5G13180 | Symbols: ANAC083 | ANAC083 (ARABIDOPSIS NAC DOMAIN CONTAINING PROTEIN 83); transcription factor | chr5:4196643-4197577 FORWARDweakly similar to ( 139) NAC67_ORYSA NAC domain-containing protein 67 (ONAC067) - Oryza sativa (Rice)moderately similar to ( 254) loc_os12g29330 12012.m06747 protein NAC domain-containing protein 71, putative, expressed seq=cds; coord=1…	-1.36898
27.3.27	RNA.regulation of transcription.NAC domain transcription factor family	grmzm2g340305_t01	Transcript	moderately similar to ( 230) AT5G04410 | Symbols: NAC2, anac078 | NAC2; transcription factor | chr5:1243980-1246416 FORWARDweakly similar to ( 159) NAC74_ORYSA NAC domain-containing protein 74 (ONAC074) - Oryza sativa (Rice)highly similar to ( 845) loc_os08g44820 12008.m080239 protein no apical meristem protein, expressed seq=cds; coord=1:203087262..203092166:1; parent_gene=GRMZM2G340305		1.0403
27.3.27	RNA.regulation of transcription.NAC domain transcription factor family	grmzm2g027309_t01	Transcript	moderately similar to ( 421) AT1G25580 | Symbols: ANAC008 | ANAC008 (Arabidopsis NAC domain containing protein 8); transcription factor | chr1:8997064-8999600 REVERSEhighly similar to ( 598) loc_os06g15690 12006.m06282 protein ANAC008, putative, expressed seq=cds; coord=6:116578564..116583279:1; parent_gene=GRMZM2G027309		0.915697
27.3.27	RNA.regulation of transcription.NAC domain transcription factor family	grmzm2g104400_t01	Transcript	moderately similar to ( 256) AT5G09330 | Symbols: | anac082 (Arabidopsis NAC domain containing protein 82); transcription factor | chr5:2892623-2894708 REVERSEweakly similar to ( 190) NAC74_ORYSA NAC domain-containing protein 74 (ONAC074) - Oryza sativa (Rice)moderately similar to ( 437) loc_os05g35170 12005.m27832 protein NAC domain-containing protein 78, putative, expressed seq=cds; coord=8:102…		0.640371	0.52754
27.3.27	RNA.regulation of transcription.NAC domain transcription factor family	grmzm2g113950_t01	Transcript	moderately similar to ( 218) AT5G04410 | Symbols: NAC2, anac078 | NAC2; transcription factor | chr5:1243980-1246416 FORWARDweakly similar to ( 130) NAC48_ORYSA NAC domain-containing protein 48 (ONAC048) - Oryza sativa (Rice)highly similar to ( 645) loc_os02g57650 12002.m10786 protein NAC domain-containing protein 78, putative, expressed seq=cds; coord=4:170244250..170248670:-1; parent_gene=GRMZM2…		0.941972
27.3.27	RNA.regulation of transcription.NAC domain transcription factor family	grmzm2g078954_t01	Transcript	moderately similar to ( 350) AT1G25580 | Symbols: ANAC008 | ANAC008 (Arabidopsis NAC domain containing protein 8); transcription factor | chr1:8997064-8999600 REVERSEhighly similar to ( 515) loc_os06g15690 12006.m06282 protein ANAC008, putative, expressed seq=cds; coord=6:116673745..116677264:1; parent_gene=GRMZM2G078954		1.42733	1.71704
27.3.27	RNA.regulation of transcription.NAC domain transcription factor family	ac233893.1_fgt002	Transcript	moderately similar to ( 263) AT5G16610 | Symbols: | unknown protein | chr5:5445068-5447945 REVERSEmoderately similar to ( 339) loc_os03g12120 12003.m35099 protein no apical meristem protein, expressed seq=cds; coord=9:146256279..146259081:1; parent_gene=AC233893.1_FG002		1.06505	1.09111
27.3.27	RNA.regulation of transcription.NAC domain transcription factor family	grmzm2g092759_t01	Transcript	moderately similar to ( 203) AT3G56570 | Symbols: | SET domain-containing protein | chr3:20958660-20961137 FORWARDmoderately similar to ( 308) loc_os01g65730 12001.m12682 protein SET domain containing protein, expressed seq=cds; coord=8:165266558..165269212:1; parent_gene=GRMZM2G092759			0.674742
27.3.27	RNA.regulation of transcription.NAC domain transcription factor family	grmzm2g336533_t01	Transcript	moderately similar to ( 241) AT1G01720 | Symbols: ATAF1, ANAC002 | ATAF1; transcription activator/ transcription factor | chr1:268471-269514 FORWARDmoderately similar to ( 288) NAC67_ORYSA NAC domain-containing protein 67 (ONAC067) - Oryza sativa (Rice)moderately similar to ( 417) loc_os03g60080 12003.m10901 protein NAC domain-containing protein 67, putative, expressed seq=cds; coord=5:2887052..2…			0.825382
27.3.27	RNA.regulation of transcription.NAC domain transcription factor family	grmzm2g064541_t01	Transcript	weakly similar to ( 190) AT5G17260 | Symbols: anac086 | anac086 (Arabidopsis NAC domain containing protein 86); transcription factor | chr5:5675323-5677912 REVERSEmoderately similar to ( 409) NAC74_ORYSA NAC domain-containing protein 74 (ONAC074) - Oryza sativa (Rice)moderately similar to ( 409) loc_os01g15640 12001.m08162 protein TIP, putative, expressed seq=cds; coord=3:38053287..38062585:-1; p…			1.01348
27.3.27	RNA.regulation of transcription.NAC domain transcription factor family	grmzm2g163843_t01	Transcript	weakly similar to ( 143) loc_os09g12380 12009.m04501 protein no apical meristem protein, expressed seq=cds; coord=8:150569499..150570962:-1; parent_gene=GRMZM2G163843			1.35063
27.3.27	RNA.regulation of transcription.NAC domain transcription factor family	grmzm2g003715_t01	Transcript	moderately similar to ( 223) AT1G33060 | Symbols: ANAC014 | no apical meristem (NAM) family protein | chr1:11975518-11978493 REVERSEweakly similar to ( 178) NAC74_ORYSA NAC domain-containing protein 74 (ONAC074) - Oryza sativa (Rice)highly similar to ( 585) loc_os08g06140 12008.m26586 protein ANAC014, putative, expressed seq=cds; coord=10:78128657..78132883:1; parent_gene=GRMZM2G003715			0.653399
27.3.27	RNA.regulation of transcription.NAC domain transcription factor family	grmzm2g430849_t01	Transcript	moderately similar to ( 241) AT3G15510 | Symbols: ATNAC2, ANAC056, NARS1 | ATNAC2 (ARABIDOPSIS NAC DOMAIN CONTAINING PROTEIN 2); transcription factor | chr3:5243696-5245037 FORWARDmoderately similar to ( 229) NAC48_ORYSA NAC domain-containing protein 48 (ONAC048) - Oryza sativa (Rice)moderately similar to ( 406) loc_os07g48450 12007.m29337 protein NAC domain-containing protein 18, putative, expre…			1.77234
27.3.27	RNA.regulation of transcription.NAC domain transcription factor family	grmzm2g089132_t01	Transcript	highly similar to ( 543) AT3G13000 | Symbols: | transcription factor | chr3:4158214-4160818 REVERSEhighly similar to ( 827) loc_os06g49060 12006.m09431 protein ternary complex factor MIP1, putative, expressed seq=cds; coord=5:58199686..58203445:1; parent_gene=GRMZM2G089132			0.886563
27.3.27	RNA.regulation of transcription.NAC domain transcription factor family	grmzm2g079632_t01	Transcript	moderately similar to ( 227) AT3G15500 | Symbols: ATNAC3, ANAC055 | ANAC055 (ARABIDOPSIS NAC DOMAIN CONTAINING PROTEIN 55); transcription factor | chr3:5234731-5235882 FORWARDmoderately similar to ( 331) NAC67_ORYSA NAC domain-containing protein 67 (ONAC067) - Oryza sativa (Rice)moderately similar to ( 331) loc_os07g12340 12007.m05687 protein NAC domain-containing protein 67, putative, expressed …			0.784468
27.3.27	RNA.regulation of transcription.NAC domain transcription factor family	grmzm2g347043_t01	Transcript	moderately similar to ( 239) AT5G08790 | Symbols: ATAF2, anac081 | ATAF2; transcription activator | chr5:2859113-2860144 REVERSEmoderately similar to ( 327) NAC67_ORYSA NAC domain-containing protein 67 (ONAC067) - Oryza sativa (Rice)moderately similar to ( 470) loc_os03g60080 12003.m10901 protein NAC domain-containing protein 67, putative, expressed seq=cds; coord=1:292086460..292088246:1; parent…			0.948653
27.3.27	RNA.regulation of transcription.NAC domain transcription factor family	grmzm2g018553_t01	Transcript	moderately similar to ( 241) AT1G01720 | Symbols: ATAF1, ANAC002 | ATAF1; transcription activator/ transcription factor | chr1:268471-269514 FORWARDmoderately similar to ( 288) NAC67_ORYSA NAC domain-containing protein 67 (ONAC067) - Oryza sativa (Rice)moderately similar to ( 417) loc_os03g60080 12003.m10901 protein NAC domain-containing protein 67, putative, expressed seq=cds; coord=5:2917535..2…			0.733607
SBP
BinCode	BinName	id	type	description	ra1	ra2	ra3
27.3.28	RNA.regulation of transcription.SBP,Squamosa promoter binding protein family	grmzm2g148467_t01	Transcript	weakly similar to ( 132) AT2G33810 | Symbols: SPL3 | SPL3 (SQUAMOSA PROMOTER BINDING PROTEIN-LIKE 3); DNA binding / transcription factor | chr2:14305342-14305828 FORWARDweakly similar to ( 125) SBP1_ANTMA Squamosa promoter-binding protein 1 - Antirrhinum majus (Garden snapdragon)moderately similar to ( 229) loc_os04g46580 12004.m09607 protein SBP domain containing protein, expressed seq=cds; coor…	-1.13935
27.3.28	RNA.regulation of transcription.SBP,Squamosa promoter binding protein family	grmzm2g371033_t01	Transcript	weakly similar to ( 131) AT5G50570 | Symbols: | squamosa promoter-binding protein, putative | chr5:20582555-20583791 REVERSEvery weakly similar to (95.1) LG1_MAIZE LIGULELESS1 protein - Zea mays (Maize)moderately similar to ( 227) loc_os01g69830 12001.m13033 protein teosinte glume architecture 1, putative, expressed seq=cds; coord=8:161522745..161525837:-1; parent_gene=GRMZM2G371033	-0.856461
27.3.28	RNA.regulation of transcription.SBP,Squamosa promoter binding protein family	grmzm2g097275_t01	Transcript	weakly similar to ( 147) AT5G43270 | Symbols: SPL2 | SPL2 (SQUAMOSA PROMOTER BINDING PROTEIN-LIKE 2); DNA binding / transcription factor | chr5:17360527-17362143 REVERSEweakly similar to ( 102) LG1_MAIZE LIGULELESS1 protein - Zea mays (Maize)moderately similar to ( 390) loc_os02g04680 12002.m33546 protein squamosa promoter-binding-like protein 10, putative, expressed seq=cds; coord=5:77940666..77…	-0.573756		-0.380035
27.3.28	RNA.regulation of transcription.SBP,Squamosa promoter binding protein family	grmzm2g067624_t01	Transcript	seq=cds; coord=7:151217709..151219397:-1; parent_gene=GRMZM2G067624	-0.925581
27.3.28	RNA.regulation of transcription.SBP,Squamosa promoter binding protein family	grmzm2g160917_t01	Transcript	weakly similar to ( 138) AT2G42200 | Symbols: SPL9 | SPL9 (SQUAMOSA PROMOTER BINDING PROTEIN-LIKE 9); transcription factor | chr2:17587601-17589451 FORWARDweakly similar to ( 113) SBP1_ANTMA Squamosa promoter-binding protein 1 - Antirrhinum majus (Garden snapdragon)weakly similar to ( 155) loc_os09g31438 12009.m06260 protein squamosa promoter-binding-like protein 9, putative, expressed seq=cds; c…	-0.842584
27.3.28	RNA.regulation of transcription.SBP,Squamosa promoter binding protein family	grmzm2g106798_t01	Transcript	weakly similar to ( 137) AT5G50570 | Symbols: | squamosa promoter-binding protein, putative | chr5:20582555-20583791 REVERSEweakly similar to ( 120) SBP1_ANTMA Squamosa promoter-binding protein 1 - Antirrhinum majus (Garden snapdragon)weakly similar to ( 155) loc_os08g41940 12008.m08172 protein teosinte glume architecture 1, putative, expressed seq=cds; coord=4:17489205..17501119:1; parent_gene=G…	-0.510619
27.3.28	RNA.regulation of transcription.SBP,Squamosa promoter binding protein family	grmzm2g460544_t01	Transcript	weakly similar to ( 141) AT2G42200 | Symbols: SPL9 | SPL9 (SQUAMOSA PROMOTER BINDING PROTEIN-LIKE 9); transcription factor | chr2:17587601-17589451 FORWARDweakly similar to ( 116) SBP2_ANTMA Squamosa promoter-binding protein 2 - Antirrhinum majus (Garden snapdragon)moderately similar to ( 347) loc_os08g39890 12008.m07969 protein squamosa promoter-binding-like protein 9, putative, expressed seq=cd…	-1.19405
27.3.28	RNA.regulation of transcription.SBP,Squamosa promoter binding protein family	grmzm2g111136_t01	Transcript	weakly similar to ( 133) AT1G02065 | Symbols: SPL8 | SPL8 (SQUAMOSA PROMOTER BINDING PROTEIN-LIKE 8); DNA binding | chr1:365625-367149 FORWARDweakly similar to ( 127) LG1_MAIZE LIGULELESS1 protein - Zea mays (Maize)moderately similar to ( 228) loc_os02g08070 12002.m06153 protein SBP-domain protein 1, putative, expressed seq=cds; coord=5:88791487..88794405:1; parent_gene=GRMZM2G111136	-0.588615		-0.869934
27.3.28	RNA.regulation of transcription.SBP,Squamosa promoter binding protein family	ac233751.1_fgt002	Transcript	very weakly similar to (87.8) AT5G50570 | Symbols: | squamosa promoter-binding protein, putative | chr5:20582555-20583791 REVERSEmoderately similar to ( 229) loc_os08g41940 12008.m08172 protein teosinte glume architecture 1, putative, expressed seq=cds; coord=4:44780143..44784469:-1; parent_gene=AC233751.1_FG002	-0.713996
27.3.28	RNA.regulation of transcription.SBP,Squamosa promoter binding protein family	grmzm5g806833_t01	Transcript	weakly similar to ( 152) loc_os09g32944 12009.m06381 protein teosinte glume architecture 1, putative, expressed seq=cds; coord=7:136328788..136330155:-1; parent_gene=GRMZM5G806833	-1.0223
27.3.28	RNA.regulation of transcription.SBP,Squamosa promoter binding protein family	grmzm2g126018_t01	Transcript	weakly similar to ( 154) AT2G42200 | Symbols: SPL9 | SPL9 (SQUAMOSA PROMOTER BINDING PROTEIN-LIKE 9); transcription factor | chr2:17587601-17589451 FORWARDweakly similar to ( 114) SBP2_ANTMA Squamosa promoter-binding protein 2 - Antirrhinum majus (Garden snapdragon)moderately similar to ( 281) loc_os09g31438 12009.m06260 protein squamosa promoter-binding-like protein 9, putative, expressed seq=cd…	-0.637302
27.3.28	RNA.regulation of transcription.SBP,Squamosa promoter binding protein family	grmzm2g061734_t01	Transcript	weakly similar to ( 154) AT5G50570 | Symbols: | squamosa promoter-binding protein, putative | chr5:20582555-20583791 REVERSEweakly similar to ( 126) LG1_MAIZE LIGULELESS1 protein - Zea mays (Maize)moderately similar to ( 416) loc_os09g32944 12009.m06381 protein teosinte glume architecture 1, putative, expressed seq=cds; coord=2:192157754..192162802:1; parent_gene=GRMZM2G061734	-0.752388
27.3.28	RNA.regulation of transcription.SBP,Squamosa promoter binding protein family	grmzm2g138421_t01	Transcript	highly similar to ( 557) AT2G47070 | Symbols: SPL1 | SPL1 (SQUAMOSA PROMOTER BINDING PROTEIN-LIKE 1); DNA binding / transcription factor | chr2:19337144-19340552 FORWARDvery weakly similar to (97.8) LG1_MAIZE LIGULELESS1 protein - Zea mays (Maize)nearly identical (1281) loc_os03g61760 12003.m11057 protein squamosa promoter-binding-like protein 12, putative, expressed seq=cds; coord=5:1845813..185…		0.963604
27.3.28	RNA.regulation of transcription.SBP,Squamosa promoter binding protein family	grmzm2g307588_t01	Transcript	weakly similar to ( 147) AT2G42200 | Symbols: SPL9 | SPL9 (SQUAMOSA PROMOTER BINDING PROTEIN-LIKE 9); transcription factor | chr2:17587601-17589451 FORWARDweakly similar to ( 114) SBP2_ANTMA Squamosa promoter-binding protein 2 - Antirrhinum majus (Garden snapdragon)moderately similar to ( 326) loc_os09g31438 12009.m06260 protein squamosa promoter-binding-like protein 9, putative, expressed seq=cd…		0.333741	0.480134
27.3.28	RNA.regulation of transcription.SBP,Squamosa promoter binding protein family	grmzm2g168229_t01	Transcript	weakly similar to ( 141) AT1G02065 | Symbols: SPL8 | SPL8 (SQUAMOSA PROMOTER BINDING PROTEIN-LIKE 8); DNA binding | chr1:365625-367149 FORWARDweakly similar to ( 134) LG1_MAIZE LIGULELESS1 protein - Zea mays (Maize)weakly similar to ( 192) loc_os02g08070 12002.m06153 protein SBP-domain protein 1, putative, expressed seq=cds; coord=4:235298614..235302250:-1; parent_gene=GRMZM2G168229			-1.17436
TCP
BinCode	BinName	id	type	description	ra1	ra2	ra3
27.3.29	RNA.regulation of transcription.TCP transcription factor family	grmzm2g089361_t01	Transcript	weakly similar to ( 107) AT1G30210 | Symbols: TCP24 | TCP24 (TEOSINTE BRANCHED1, CYCLOIDEA, AND PCF FAMILY 24); transcription factor | chr1:10628754-10629728 REVERSEmoderately similar to ( 248) loc_os03g57190 12003.m10638 protein TCP family transcription factor containing protein, expressed seq=cds; coord=5:4945066..4946626:-1; parent_gene=GRMZM2G089361	-1.19154
27.3.29	RNA.regulation of transcription.TCP transcription factor family	grmzm2g089638_t01	Transcript	weakly similar to ( 164) AT1G58100 | Symbols: | TCP family transcription factor, putative | chr1:21512680-21513885 REVERSEmoderately similar to ( 296) loc_os12g07480 12012.m04737 protein TCP family transcription factor containing protein, expressed seq=cds; coord=3:140831478..140833502:1; parent_gene=GRMZM2G089638	-1.29193
27.3.29	RNA.regulation of transcription.TCP transcription factor family	grmzm2g093895_t01	Transcript	weakly similar to ( 167) AT1G58100 | Symbols: | TCP family transcription factor, putative | chr1:21512680-21513885 REVERSEmoderately similar to ( 323) loc_os12g07480 12012.m04737 protein TCP family transcription factor containing protein, expressed seq=cds; coord=10:10288817..10290923:-1; parent_gene=GRMZM2G093895	-1.03858
27.3.29	RNA.regulation of transcription.TCP transcription factor family	ac205574.3_fgt006	Transcript	moderately similar to ( 209) AT3G15030 | Symbols: TCP4 | TCP4 (TCP family transcription factor 4); transcription factor | chr3:5062308-5063570 FORWARDmoderately similar to ( 427) loc_os01g11550 12001.m07772 protein mutant cincinnata, putative, expressed seq=cds; coord=3:3475915..3478576:1; parent_gene=AC205574.3_FG006	-0.921386
27.3.29	RNA.regulation of transcription.TCP transcription factor family	grmzm2g330719_t01	Transcript	weakly similar to ( 150) AT3G27010 | Symbols: AT-TCP20, PCF1, TCP20 | AT-TCP20; transcription factor | chr3:9957810-9958754 REVERSEmoderately similar to ( 224) loc_os01g69980 12001.m43355 protein TCP-domain protein, putative, expressed seq=cds; coord=8:160977905..160979383:1; parent_gene=GRMZM2G330719	-4.17393	-1.85722	-2.57162
27.3.29	RNA.regulation of transcription.TCP transcription factor family	grmzm2g178603_t01	Transcript	weakly similar to ( 111) AT5G23280 | Symbols: | TCP family transcription factor, putative | chr5:7843017-7843769 FORWARDweakly similar to ( 126) loc_os02g42380 12002.m09273 protein TCP-domain protein, putative, expressed seq=cds; coord=5:188455199..188456320:-1; parent_gene=GRMZM2G178603	-1.79437
27.3.29	RNA.regulation of transcription.TCP transcription factor family	grmzm2g078077_t01	Transcript	weakly similar to ( 119) AT5G23280 | Symbols: | TCP family transcription factor, putative | chr5:7843017-7843769 FORWARDweakly similar to ( 141) loc_os02g42380 12002.m09273 protein TCP-domain protein, putative, expressed seq=cds; coord=4:145614348..145615398:1; parent_gene=GRMZM2G078077	-1.79754		-0.885499
27.3.29	RNA.regulation of transcription.TCP transcription factor family	grmzm2g092214_t01	Transcript	weakly similar to ( 134) AT3G27010 | Symbols: AT-TCP20, PCF1, TCP20 | AT-TCP20; transcription factor | chr3:9957810-9958754 REVERSEmoderately similar to ( 216) loc_os01g69980 12001.m43355 protein TCP-domain protein, putative, expressed seq=cds; coord=3:158450514..158452456:-1; parent_gene=GRMZM2G092214	-0.988621
27.3.29	RNA.regulation of transcription.TCP transcription factor family	grmzm2g015037_t01	Transcript	weakly similar to ( 167) AT3G15030 | Symbols: TCP4 | TCP4 (TCP family transcription factor 4); transcription factor | chr3:5062308-5063570 FORWARDvery weakly similar to (87.4) PLDA1_MAIZE Phospholipase D alpha 1 (EC 3.1.4.4) (PLD alpha 1) (Choline phosphatase 1) (Phosphatidylcholine-hydrolyzing phospholipase D 1) - Zea mays (Maize)moderately similar to ( 311) loc_os01g11550 12001.m07772 protein m…	-0.708196
27.3.29	RNA.regulation of transcription.TCP transcription factor family	ac199782.5_fgt003	Transcript	very weakly similar to (92.4) AT5G51910 | Symbols: | TCP family transcription factor, putative | chr5:21094704-21095585 REVERSEweakly similar to ( 189) loc_os09g34950 12009.m06495 protein auxin-induced basic helix-loop-helix transcription factor, putative, expressed seq=cds; coord=2:194355266..194356913:-1; parent_gene=AC199782.5_FG003	-1.10164
27.3.29	RNA.regulation of transcription.TCP transcription factor family	grmzm2g465091_t01	Transcript	weakly similar to ( 117) AT5G23280 | Symbols: | TCP family transcription factor, putative | chr5:7843017-7843769 FORWARDweakly similar to ( 163) loc_os04g44440 12004.m09403 protein TCP-domain protein, putative, expressed seq=cds; coord=10:132033330..132034374:1; parent_gene=GRMZM2G465091	-1.86437
27.3.29	RNA.regulation of transcription.TCP transcription factor family	grmzm2g064628_t01	Transcript	weakly similar to ( 105) AT3G18550 | Symbols: BRC1, TCP18, ATTCP18 | BRC1 (BRANCHED 1); transcription factor | chr3:6383769-6385604 FORWARDweakly similar to ( 180) loc_os09g24480 12009.m05602 protein teosinte-branched one, putative seq=cds; coord=7:110781361..110782852:1; parent_gene=GRMZM2G064628		-1.25306
27.3.29	RNA.regulation of transcription.TCP transcription factor family	grmzm2g096610_t01	Transcript	very weakly similar to (91.7) AT1G69690 | Symbols: | TCP family transcription factor, putative | chr1:26216449-26217426 FORWARDweakly similar to ( 152) loc_os04g11830 12004.m06426 protein TCP-domain protein, putative, expressed seq=cds; coord=10:100072291..100073204:-1; parent_gene=GRMZM2G096610			0.77546
Trihelix
BinCode	BinName	id	type	description	ra1	ra2	ra3
27.3.30	RNA.regulation of transcription.Trihelix, Triple-Helix transcription factor family	grmzm2g156348_t01	Transcript	weakly similar to ( 120) AT2G38250 | Symbols: | DNA-binding protein-related | chr2:16018384-16019500 FORWARDmoderately similar to ( 327) loc_os04g51320 12004.m10028 protein transcription factor GT-3b, putative, expressed seq=cds; coord=2:12096512..12099684:1; parent_gene=GRMZM2G156348	-0.799018
27.3.30	RNA.regulation of transcription.Trihelix, Triple-Helix transcription factor family	grmzm2g428470_t01	Transcript	weakly similar to ( 105) AT2G44730 | Symbols: | transcription factor | chr2:18437447-18438565 REVERSEmoderately similar to ( 293) loc_os10g41460 12010.m06910 protein expressed protein seq=cds; coord=9:114551278..114553268:-1; parent_gene=GRMZM2G428470	-0.727826
27.3.30	RNA.regulation of transcription.Trihelix, Triple-Helix transcription factor family	grmzm2g179274_t01	Transcript	weakly similar to ( 150) loc_os02g35690 12002.m100239 protein 6b-interacting protein 1, putative, expressed seq=cds; coord=8:123507161..123508904:-1; parent_gene=GRMZM2G179274	-0.845264
27.3.30	RNA.regulation of transcription.Trihelix, Triple-Helix transcription factor family	grmzm2g031493_t01	Transcript	weakly similar to ( 152) AT2G33550 | Symbols: | gt-2-related | chr2:14210180-14211487 REVERSEmoderately similar to ( 298) loc_os01g70230 12001.m13071 protein shattering protein, putative seq=cds; coord=3:156798289..156800105:-1; parent_gene=GRMZM2G031493	-1.27054
27.3.30	RNA.regulation of transcription.Trihelix, Triple-Helix transcription factor family	grmzm2g081445_t01	Transcript	weakly similar to ( 139) AT1G31310 | Symbols: | hydroxyproline-rich glycoprotein family protein | chr1:11198565-11200025 REVERSEweakly similar to ( 191) loc_os04g57530 12004.m10638 protein shattering protein, putative, expressed seq=cds; coord=2:2477289..2480012:1; parent_gene=GRMZM2G081445	-1.29251
27.3.30	RNA.regulation of transcription.Trihelix, Triple-Helix transcription factor family	grmzm5g850092_t01	Transcript	very weakly similar to (97.8) AT2G44730 | Symbols: | transcription factor | chr2:18437447-18438565 REVERSEmoderately similar to ( 280) loc_os08g37810 12008.m07766 protein expressed protein seq=cds; coord=4:196983548..196984915:1; parent_gene=GRMZM5G850092	-0.736304
27.3.30	RNA.regulation of transcription.Trihelix, Triple-Helix transcription factor family	grmzm2g379179_t01	Transcript	very weakly similar to (81.3) AT2G44730 | Symbols: | transcription factor | chr2:18437447-18438565 REVERSEmoderately similar to ( 246) loc_os08g37810 12008.m07766 protein expressed protein seq=cds; coord=1:182354882..182356502:1; parent_gene=GRMZM2G379179	-0.714599
27.3.30	RNA.regulation of transcription.Trihelix, Triple-Helix transcription factor family	grmzm2g380094_t01	Transcript	weakly similar to ( 155) AT3G11100 | Symbols: | transcription factor | chr3:3476490-3477320 REVERSEmoderately similar to ( 357) loc_os02g35690 12002.m100239 protein 6b-interacting protein 1, putative, expressed seq=cds; coord=5:175054040..175055248:1; parent_gene=GRMZM2G380094	-0.77117
27.3.30	RNA.regulation of transcription.Trihelix, Triple-Helix transcription factor family	grmzm2g415229_t01	Transcript	weakly similar to ( 129) AT2G38250 | Symbols: | DNA-binding protein-related | chr2:16018384-16019500 FORWARDmoderately similar to ( 325) loc_os04g51320 12004.m10028 protein transcription factor GT-3b, putative, expressed seq=cds; coord=10:141020599..141023637:-1; parent_gene=GRMZM2G415229	-1.14275
27.3.30	RNA.regulation of transcription.Trihelix, Triple-Helix transcription factor family	grmzm2g162840_t01	Transcript	moderately similar to ( 206) AT2G33550 | Symbols: | gt-2-related | chr2:14210180-14211487 REVERSEmoderately similar to ( 317) loc_os02g31160 12002.m08259 protein conserved hypothetical protein seq=cds; coord=4:95679252..95683955:-1; parent_gene=GRMZM2G162840	-1.3245
27.3.30	RNA.regulation of transcription.Trihelix, Triple-Helix transcription factor family	grmzm2g021831_t01	Transcript	weakly similar to ( 152) AT3G11100 | Symbols: | transcription factor | chr3:3476490-3477320 REVERSEmoderately similar to ( 359) loc_os04g36790 12004.m08719 protein 6b-interacting protein 1, putative, expressed seq=cds; coord=2:45778701..45780304:1; parent_gene=GRMZM2G021831	-0.894114
27.3.30	RNA.regulation of transcription.Trihelix, Triple-Helix transcription factor family	grmzm2g084684_t01	Transcript	moderately similar to ( 201) AT2G33550 | Symbols: | gt-2-related | chr2:14210180-14211487 REVERSEmoderately similar to ( 280) loc_os02g31160 12002.m08259 protein conserved hypothetical protein seq=cds; coord=5:165851119..165855227:-1; parent_gene=GRMZM2G084684	-1.07225	-1.294	-1.07119
27.3.30	RNA.regulation of transcription.Trihelix, Triple-Helix transcription factor family	grmzm2g111760_t01	Transcript	weakly similar to ( 139) AT1G76890 | Symbols: GT2, AT-GT2 | GT2; transcription factor | chr1:28873211-28875203 REVERSEmoderately similar to ( 277) loc_os02g01380 12002.m77761 protein expressed protein seq=cds; coord=5:67179848..67182803:-1; parent_gene=GRMZM2G111760	-0.983962
27.3.30	RNA.regulation of transcription.Trihelix, Triple-Helix transcription factor family	grmzm2g334722_t01	Transcript	weakly similar to ( 151) loc_os02g07800 12002.m06126 protein expressed protein seq=cds; coord=5:86823954..86848300:1; parent_gene=GRMZM2G334722	-0.993593
27.3.30	RNA.regulation of transcription.Trihelix, Triple-Helix transcription factor family	grmzm2g037128_t01	Transcript	weakly similar to ( 145) AT1G76890 | Symbols: GT2, AT-GT2 | GT2; transcription factor | chr1:28873211-28875203 REVERSEmoderately similar to ( 268) loc_os02g01380 12002.m77761 protein expressed protein seq=cds; coord=4:240522557..240525859:1; parent_gene=GRMZM2G037128	-0.894523
27.3.30	RNA.regulation of transcription.Trihelix, Triple-Helix transcription factor family	grmzm2g481163_t01	Transcript	weakly similar to ( 105) AT2G44730 | Symbols: | transcription factor | chr2:18437447-18438565 REVERSEmoderately similar to ( 317) loc_os10g41460 12010.m06910 protein expressed protein seq=cds; coord=1:94880053..94881644:1; parent_gene=GRMZM2G481163			0.838332
27.3.30	RNA.regulation of transcription.Trihelix, Triple-Helix transcription factor family	grmzm2g392168_t01	Transcript	weakly similar to ( 138) AT3G58630 | Symbols: | transcription factor | chr3:21683928-21685771 REVERSEmoderately similar to ( 338) loc_os04g36790 12004.m08719 protein 6b-interacting protein 1, putative, expressed seq=cds; coord=10:119916059..119917843:-1; parent_gene=GRMZM2G392168			0.744174
27.3.30	RNA.regulation of transcription.Trihelix, Triple-Helix transcription factor family	grmzm2g153575_t01	Transcript	weakly similar to ( 122) AT3G54390 | Symbols: | transcription factor | chr3:20137912-20138863 REVERSEvery weakly similar to (81.3) PGKH_WHEAT Phosphoglycerate kinase, chloroplast precursor (EC 2.7.2.3) - Triticum aestivum (Wheat)moderately similar to ( 296) loc_os09g38570 12009.m06798 protein expressed protein seq=cds; coord=2:198399759..198404962:1; parent_gene=GRMZM2G153575			1.52378
27.3.30	RNA.regulation of transcription.Trihelix, Triple-Helix transcription factor family	grmzm2g163157_t01	Transcript	weakly similar to ( 119) AT5G05550 | Symbols: | transcription factor | chr5:1639529-1640550 REVERSEmoderately similar to ( 206) loc_os01g48320 12001.m43140 protein 6b-interacting protein 1, putative, expressed seq=cds; coord=8:150144896..150146384:-1; parent_gene=GRMZM2G163157			0.885871
27.3.30	RNA.regulation of transcription.Trihelix, Triple-Helix transcription factor family	grmzm2g034526_t01	Transcript	weakly similar to ( 117) AT4G28300 | Symbols: | hydroxyproline-rich glycoprotein family protein | chr4:14015414-14016823 FORWARDhighly similar to ( 547) loc_os01g48220 12001.m11014 protein expressed protein seq=cds; coord=3:209852208..209855003:1; parent_gene=GRMZM2G034526			0.438467
27.3.30	RNA.regulation of transcription.Trihelix, Triple-Helix transcription factor family	grmzm2g080583_t01	Transcript	weakly similar to ( 119) AT5G05550 | Symbols: | transcription factor | chr5:1639529-1640550 REVERSEmoderately similar to ( 202) loc_os01g48320 12001.m43140 protein 6b-interacting protein 1, putative, expressed seq=cds; coord=3:209734161..209736175:1; parent_gene=GRMZM2G080583			0.777194
WRKY
BinCode	BinName	id	type	description	ra1	ra2	ra3
27.3.32	RNA.regulation of transcription.WRKY domain transcription factor family	grmzm2g025895_t01	Transcript	weakly similar to ( 117) AT4G23810 | Symbols: WRKY53, ATWRKY53 | WRKY53; DNA binding / protein binding / transcription activator/ transcription factor | chr4:12392666-12393739 REVERSEmoderately similar to ( 251) loc_os09g16510 12009.m04911 protein OsWRKY74 - Superfamily of rice TFs having WRKY and zinc finger domains, expressed seq=cds; coord=7:93164343..93166011:-1; parent_gene=GRMZM2G025895	0.872151	0.787939	1.63563
27.3.32	RNA.regulation of transcription.WRKY domain transcription factor family	grmzm2g141299_t01	Transcript	weakly similar to ( 129) AT1G29280 | Symbols: WRKY65, ATWRKY65 | WRKY65; transcription factor | chr1:10236589-10237467 FORWARDweakly similar to ( 193) loc_os01g54600 12001.m11623 protein OsWRKY13 - Superfamily of rice TFs having WRKY and zinc finger domains, expressed seq=cds; coord=3:198214591..198216492:-1; parent_gene=GRMZM2G141299	-0.767354
27.3.32	RNA.regulation of transcription.WRKY domain transcription factor family	grmzm2g102583_t01	Transcript	weakly similar to ( 115) AT4G31550 | Symbols: WRKY11, ATWRKY11 | WRKY11; calmodulin binding / transcription factor | chr4:15290065-15291458 REVERSEmoderately similar to ( 245) loc_os04g21950 12004.m07345 protein OsWRKY51 - Superfamily of rice TFs having WRKY and zinc finger domains, expressed seq=cds; coord=2:79282990..79284850:-1; parent_gene=GRMZM2G102583	-0.841825
27.3.32	RNA.regulation of transcription.WRKY domain transcription factor family	grmzm2g071907_t01	Transcript	moderately similar to ( 245) AT4G31550 | Symbols: WRKY11, ATWRKY11 | WRKY11; calmodulin binding / transcription factor | chr4:15290065-15291458 REVERSEmoderately similar to ( 393) loc_os04g51560 12004.m10052 protein OsWRKY68 - Superfamily of rice TFs having WRKY and zinc finger domains, expressed seq=cds; coord=2:11753531..11755126:-1; parent_gene=GRMZM2G071907	-0.968524
27.3.32	RNA.regulation of transcription.WRKY domain transcription factor family	grmzm2g148561_t01	Transcript	weakly similar to ( 108) AT2G23320 | Symbols: WRKY15 | WRKY15; calmodulin binding / transcription factor | chr2:9924998-9925991 FORWARDweakly similar to ( 169) loc_os08g13840 12008.m26630 protein OsWRKY25 - Superfamily of rice TFs having WRKY and zinc finger domains, expressed seq=cds; coord=4:69920108..69921324:-1; parent_gene=GRMZM2G148561	-1.0333		0.747259
27.3.32	RNA.regulation of transcription.WRKY domain transcription factor family	ac205562.3_fgt002	Transcript	weakly similar to ( 122) AT4G23810 | Symbols: WRKY53, ATWRKY53 | WRKY53; DNA binding / protein binding / transcription activator/ transcription factor | chr4:12392666-12393739 REVERSEmoderately similar to ( 212) loc_os08g29660 12008.m06969 protein OsWRKY69 - Superfamily of rice TFs having WRKY and zinc finger domains, expressed seq=cds; coord=4:73366185..73367147:1; parent_gene=AC205562.3_FG002	-1.10983
27.3.32	RNA.regulation of transcription.WRKY domain transcription factor family	grmzm2g061408_t01	Transcript	weakly similar to ( 117) AT4G23810 | Symbols: WRKY53, ATWRKY53 | WRKY53; DNA binding / protein binding / transcription activator/ transcription factor | chr4:12392666-12393739 REVERSEmoderately similar to ( 251) loc_os09g16510 12009.m04911 protein OsWRKY74 - Superfamily of rice TFs having WRKY and zinc finger domains, expressed seq=cds; coord=8:109566616..109568284:-1; parent_gene=GRMZM2G061408	0.873957	0.794068	1.63489
27.3.32	RNA.regulation of transcription.WRKY domain transcription factor family	grmzm2g038158_t01	Transcript	weakly similar to ( 162) AT5G52830 | Symbols: WRKY27, ATWRKY27 | WRKY27; transcription factor | chr5:21410996-21412218 FORWARDmoderately similar to ( 244) loc_os02g16540 12002.m77729 protein OsWRKY39v2 - Superfamily of rice TFs having WRKY and zinc finger domains, expressed seq=cds; coord=4:223519261..223521139:1; parent_gene=GRMZM2G038158	-0.770914
27.3.32	RNA.regulation of transcription.WRKY domain transcription factor family	grmzm2g063880_t01	Transcript	very weakly similar to (98.6) AT5G24110 | Symbols: WRKY30, ATWRKY30 | WRKY30; transcription factor | chr5:8153416-8154633 REVERSEweakly similar to ( 182) loc_os05g49620 12005.m09032 protein OsWRKY19 - Superfamily of rice TFs having WRKY and zinc finger domains, expressed seq=cds; coord=8:72382998..72384377:-1; parent_gene=GRMZM2G063880	-0.980412
27.3.32	RNA.regulation of transcription.WRKY domain transcription factor family	grmzm5g816457_t01	Transcript	moderately similar to ( 378) AT5G56270 | Symbols: WRKY2, ATWRKY2 | WRKY2; transcription factor | chr5:22780816-22783137 FORWARDhighly similar to ( 615) loc_os04g39570 12004.m35157 protein OsWRKY35v1 - Superfamily of rice TFs having WRKY and zinc finger domains, expressed seq=cds; coord=2:38760033..38765436:1; parent_gene=GRMZM5G816457	-0.708245		-0.559762
27.3.32	RNA.regulation of transcription.WRKY domain transcription factor family	grmzm2g091331_t01	Transcript	moderately similar to ( 220) AT4G31550 | Symbols: WRKY11, ATWRKY11 | WRKY11; calmodulin binding / transcription factor | chr4:15290065-15291458 REVERSEmoderately similar to ( 355) loc_os04g51560 12004.m10052 protein OsWRKY68 - Superfamily of rice TFs having WRKY and zinc finger domains, expressed seq=cds; coord=10:141270670..141272273:1; parent_gene=GRMZM2G091331	-1.0955
27.3.32	RNA.regulation of transcription.WRKY domain transcription factor family	grmzm2g105140_t01	Transcript	weakly similar to ( 132) AT4G01250 | Symbols: WRKY22, AtWRKY22 | WRKY22; transcription factor | chr4:522839-524129 REVERSEmoderately similar to ( 286) loc_os01g43550 12001.m42681 protein OsWRKY12 - Superfamily of rice TFs having WRKY and zinc finger domains, expressed seq=cds; coord=3:217462232..217464092:1; parent_gene=GRMZM2G105140	-0.917145
27.3.32	RNA.regulation of transcription.WRKY domain transcription factor family	grmzm2g013391_t01	Transcript	weakly similar to ( 133) AT1G29280 | Symbols: WRKY65, ATWRKY65 | WRKY65; transcription factor | chr1:10236589-10237467 FORWARDmoderately similar to ( 218) loc_os01g54600 12001.m11623 protein OsWRKY13 - Superfamily of rice TFs having WRKY and zinc finger domains, expressed seq=cds; coord=8:174376651..174378151:-1; parent_gene=GRMZM2G013391	-1.05964
27.3.32	RNA.regulation of transcription.WRKY domain transcription factor family	grmzm2g123387_t01	Transcript	weakly similar to ( 154) AT2G44745 | Symbols: | WRKY family transcription factor | chr2:18447482-18449004 REVERSEmoderately similar to ( 201) loc_os04g46060 12004.m09557 protein OsWRKY36 - Superfamily of rice TFs having WRKY and zinc finger domains, expressed seq=cds; coord=2:21500615..21505542:-1; parent_gene=GRMZM2G123387	-0.623957	-0.933644
27.3.32	RNA.regulation of transcription.WRKY domain transcription factor family	grmzm2g018721_t01	Transcript	weakly similar to ( 172) AT1G69310 | Symbols: WRKY57, ATWRKY57 | WRKY57; transcription factor | chr1:26056118-26057909 REVERSEweakly similar to ( 178) loc_os07g02060 12007.m04680 protein OsWRKY29 - Superfamily of rice TFs having WRKY and zinc finger domains, expressed seq=cds; coord=7:1920108..1921464:1; parent_gene=GRMZM2G018721	-1.35169
27.3.32	RNA.regulation of transcription.WRKY domain transcription factor family	grmzm2g324999_t01	Transcript	weakly similar to ( 115) AT4G11070 | Symbols: WRKY41, AtWRKY41 | WRKY41; transcription factor | chr4:6759303-6760763 FORWARDweakly similar to ( 193) loc_os08g29660 12008.m06969 protein OsWRKY69 - Superfamily of rice TFs having WRKY and zinc finger domains, expressed seq=cds; coord=1:216580897..216582541:1; parent_gene=GRMZM2G324999		0.972221	1.25786
27.3.32	RNA.regulation of transcription.WRKY domain transcription factor family	grmzm2g449681_t01	Transcript	moderately similar to ( 313) AT2G38470 | Symbols: WRKY33, ATWRKY33 | WRKY33; transcription factor | chr2:16108476-16110539 FORWARDmoderately similar to ( 484) loc_os05g27730 12005.m07061 protein OsWRKY53 - Superfamily of rice TFs having WRKY and zinc finger domains, expressed seq=cds; coord=8:110214059..110216431:-1; parent_gene=GRMZM2G449681			1.17513
27.3.32	RNA.regulation of transcription.WRKY domain transcription factor family	grmzm2g163418_t01	Transcript	weakly similar to ( 109) AT4G23810 | Symbols: WRKY53, ATWRKY53 | WRKY53; DNA binding / protein binding / transcription activator/ transcription factor | chr4:12392666-12393739 REVERSEmoderately similar to ( 251) loc_os09g16510 12009.m04911 protein OsWRKY74 - Superfamily of rice TFs having WRKY and zinc finger domains, expressed seq=cds; coord=2:175752568..175755074:1; parent_gene=GRMZM2G163418			0.942083
27.3.32	RNA.regulation of transcription.WRKY domain transcription factor family	grmzm2g012724_t01	Transcript	moderately similar to ( 303) AT2G38470 | Symbols: WRKY33, ATWRKY33 | WRKY33; transcription factor | chr2:16108476-16110539 FORWARDmoderately similar to ( 500) loc_os05g27730 12005.m07061 protein OsWRKY53 - Superfamily of rice TFs having WRKY and zinc finger domains, expressed seq=cds; coord=6:141413048..141415248:-1; parent_gene=GRMZM2G012724			1.12653
27.3.32	RNA.regulation of transcription.WRKY domain transcription factor family	grmzm2g139815_t01	Transcript	very weakly similar to (94.0) AT4G23810 | Symbols: WRKY53, ATWRKY53 | WRKY53; DNA binding / protein binding / transcription activator/ transcription factor | chr4:12392666-12393739 REVERSEweakly similar to ( 200) loc_os09g16510 12009.m04911 protein OsWRKY74 - Superfamily of rice TFs having WRKY and zinc finger domains, expressed seq=cds; coord=7:92391794..92393825:1; parent_gene=GRMZM2G139815			0.861254
27.3.32	RNA.regulation of transcription.WRKY domain transcription factor family	grmzm2g158328_t01	Transcript	weakly similar to ( 166) loc_os01g60600 12001.m12188 protein WRKY DNA binding domain containing protein, expressed seq=cds; coord=3:184849632..184852523:1; parent_gene=GRMZM2G158328			0.913511
27.3.32	RNA.regulation of transcription.WRKY domain transcription factor family	grmzm2g151444_t01	Transcript	weakly similar to ( 156) AT4G39410 | Symbols: WRKY13, ATWRKY13 | WRKY13; transcription factor | chr4:18332937-18334789 REVERSEweakly similar to ( 166) loc_os01g08710 12001.m07496 protein OsWRKY79 - Superfamily of rice TFs having WRKY and zinc finger domains, expressed seq=cds; coord=3:9234113..9242047:1; parent_gene=GRMZM2G151444			-1.04
27.3.32	RNA.regulation of transcription.WRKY domain transcription factor family	grmzm2g130854_t01	Transcript	moderately similar to ( 384) AT4G26640 | Symbols: WRKY20, AtWRKY20 | WRKY20; transcription factor | chr4:13437298-13440693 REVERSEhighly similar to ( 934) loc_os07g39480 12007.m08190 protein OsWRKY78 - Superfamily of rice TFs having WRKY and zinc finger domains, expressed seq=cds; coord=2:207841392..207847758:-1; parent_gene=GRMZM2G130854			0.884474
27.3.32	RNA.regulation of transcription.WRKY domain transcription factor family	grmzm2g059562_t01	Transcript	weakly similar to ( 148) loc_os01g60640 12001.m12192 protein OsWRKY21 - Superfamily of rice TFs having WRKY and zinc finger domains, expressed seq=cds; coord=3:184816891..184818185:-1; parent_gene=GRMZM2G059562			1.10753
27.3.32	RNA.regulation of transcription.WRKY domain transcription factor family	grmzm2g137802_t01	Transcript	weakly similar to ( 136) AT5G26170 | Symbols: WRKY50, ATWRKY50 | WRKY50; transcription factor | chr5:9147176-9148128 REVERSEmoderately similar to ( 216) loc_os05g46020 12005.m08727 protein OsWRKY7 - Superfamily of rice TFs having WRKY and zinc finger domains, expressed seq=cds; coord=8:136039539..136041895:-1; parent_gene=GRMZM2G137802			1.43784
27.3.32	RNA.regulation of transcription.WRKY domain transcription factor family	grmzm2g149683_t01	Transcript	weakly similar to ( 131) AT2G34830 | Symbols: WRKY35, MEE24, AtWRKY35 | WRKY35 (WRKY DNA-binding protein 35); transcription factor | chr2:14693839-14696378 REVERSEmoderately similar to ( 313) loc_os01g43550 12001.m42681 protein OsWRKY12 - Superfamily of rice TFs having WRKY and zinc finger domains, expressed seq=cds; coord=8:145230331..145231761:-1; parent_gene=GRMZM2G149683			1.10757
27.3.32	RNA.regulation of transcription.WRKY domain transcription factor family	grmzm2g090594_t01	Transcript	weakly similar to ( 137) AT2G24570 | Symbols: WRKY17, ATWRKY17 | WRKY17; calmodulin binding / transcription factor | chr2:10437676-10439222 REVERSEweakly similar to ( 193) loc_os08g13840 12008.m26630 protein OsWRKY25 - Superfamily of rice TFs having WRKY and zinc finger domains, expressed seq=cds; coord=10:68725531..68726795:1; parent_gene=GRMZM2G090594			0.976765
27.3.32	RNA.regulation of transcription.WRKY domain transcription factor family	grmzm2g143204_t01	Transcript	weakly similar to ( 144) AT1G69310 | Symbols: WRKY57, ATWRKY57 | WRKY57; transcription factor | chr1:26056118-26057909 REVERSEweakly similar to ( 154) loc_os03g55080 12003.m10423 protein OsWRKY3 - Superfamily of rice TFs having WRKY and zinc finger domains, expressed seq=cds; coord=1:278162171..278165808:-1; parent_gene=GRMZM2G143204			1.70087
27.3.32	RNA.regulation of transcription.WRKY domain transcription factor family	grmzm2g468056_t01	Transcript	very weakly similar to (91.3) loc_os01g60640 12001.m12192 protein OsWRKY21 - Superfamily of rice TFs having WRKY and zinc finger domains, expressed seq=cds; coord=8:170335807..170336865:-1; parent_gene=GRMZM2G468056			0.996645
27.3.32	RNA.regulation of transcription.WRKY domain transcription factor family	grmzm2g120320_t01	Transcript	weakly similar to ( 134) AT4G31800 | Symbols: WRKY18 | WRKY18; transcription factor | chr4:15383296-15384812 FORWARDmoderately similar to ( 339) loc_os02g08440 12002.m33348 protein OsWRKY71 - Superfamily of rice TFs having WRKY and zinc finger domains, expressed seq=cds; coord=5:92804729..92806565:1; parent_gene=GRMZM2G120320			1.19179
27.3.32	RNA.regulation of transcription.WRKY domain transcription factor family	grmzm2g030272_t01	Transcript	very weakly similar to (80.5) AT2G46400 | Symbols: WRKY46, ATWRKY46 | WRKY46; transcription factor | chr2:19043676-19044754 REVERSEmoderately similar to ( 300) loc_os03g20550 12003.m101328 protein OsWRKY55 - Superfamily of rice TFs having WRKY and zinc finger domains, expressed seq=cds; coord=1:52919938..52921358:-1; parent_gene=GRMZM2G030272			0.914879
General
BinCode	BinName	id	type	description	ra1	ra2	ra3
27.3.50	RNA.regulation of transcription.General Transcription	grmzm2g105335_t01	Transcript	weakly similar to ( 162) AT3G13960 | Symbols: AtGRF5 | AtGRF5 (GROWTH-REGULATING FACTOR 5); transcription activator | chr3:4608526-4610160 FORWARDmoderately similar to ( 408) loc_os02g53690 12002.m10398 protein atGRF5, putative, expressed seq=cds; coord=4:177122616..177124549:1; parent_gene=GRMZM2G105335	-0.503468
27.3.50	RNA.regulation of transcription.General Transcription	grmzm2g096709_t01	Transcript	weakly similar to ( 112) AT3G13960 | Symbols: AtGRF5 | AtGRF5 (GROWTH-REGULATING FACTOR 5); transcription activator | chr3:4608526-4610160 FORWARDmoderately similar to ( 311) loc_os07g28430 12007.m07115 protein growth-regulating factor, putative, expressed seq=cds; coord=7:144980649..144983235:1; parent_gene=GRMZM2G096709	-0.736622
27.3.50	RNA.regulation of transcription.General Transcription	grmzm5g850129_t01	Transcript	weakly similar to ( 145) AT3G13960 | Symbols: AtGRF5 | AtGRF5 (GROWTH-REGULATING FACTOR 5); transcription activator | chr3:4608526-4610160 FORWARDweakly similar to ( 192) loc_os02g53690 12002.m10398 protein atGRF5, putative, expressed seq=cds; coord=6:108305466..108307189:1; parent_gene=GRMZM5G850129	-0.68279
27.3.50	RNA.regulation of transcription.General Transcription	grmzm2g045977_t01	Transcript	weakly similar to ( 132) AT2G36400 | Symbols: AtGRF3 | AtGRF3 (GROWTH-REGULATING FACTOR 3); transcription activator | chr2:15270300-15272617 REVERSEmoderately similar to ( 285) loc_os02g45570 12002.m33821 protein growth-regulating factor, putative, expressed seq=cds; coord=5:196141332..196142725:1; parent_gene=GRMZM2G045977	-1.10593
27.3.50	RNA.regulation of transcription.General Transcription	grmzm2g124566_t01	Transcript	weakly similar to ( 131) AT2G36400 | Symbols: AtGRF3 | AtGRF3 (GROWTH-REGULATING FACTOR 3); transcription activator | chr2:15270300-15272617 REVERSEmoderately similar to ( 284) loc_os02g45570 12002.m33821 protein growth-regulating factor, putative, expressed seq=cds; coord=4:155804713..155806066:1; parent_gene=GRMZM2G124566	-1.07475
27.3.50	RNA.regulation of transcription.General Transcription	grmzm2g067743_t01	Transcript	weakly similar to ( 112) loc_os06g10310 12006.m05749 protein growth-regulating factor 1, putative seq=cds; coord=9:9812369..9814204:-1; parent_gene=GRMZM2G067743	-1.11583
27.3.50	RNA.regulation of transcription.General Transcription	grmzm2g098594_t01	Transcript	very weakly similar to (97.8) AT3G13960 | Symbols: AtGRF5 | AtGRF5 (GROWTH-REGULATING FACTOR 5); transcription activator | chr3:4608526-4610160 FORWARDmoderately similar to ( 264) loc_os06g02560 12006.m04989 protein growth-regulating factor, putative, expressed seq=cds; coord=6:60193338..60196491:-1; parent_gene=GRMZM2G098594	-0.440141
27.3.50	RNA.regulation of transcription.General Transcription	grmzm2g159948_t01	Transcript	very weakly similar to (99.8) AT4G10920 | Symbols: KELP | KELP; DNA binding / transcription coactivator/ transcription regulator | chr4:6697894-6699103 REVERSEweakly similar to ( 104) loc_os01g50960 12001.m11277 protein RNA polymerase II transcriptional coactivator KELP, putative, expressed seq=cds; coord=3:204627419..204629992:1; parent_gene=GRMZM2G159948	-1.13743	-0.920856
27.3.50	RNA.regulation of transcription.General Transcription	grmzm5g893117_t01	Transcript	weakly similar to ( 110) AT3G13960 | Symbols: AtGRF5 | AtGRF5 (GROWTH-REGULATING FACTOR 5); transcription activator | chr3:4608526-4610160 FORWARDweakly similar to ( 157) loc_os02g53690 12002.m10398 protein atGRF5, putative, expressed seq=cds; coord=5:211724540..211725862:-1; parent_gene=GRMZM5G893117			1.16204
27.3.50	RNA.regulation of transcription.General Transcription	grmzm2g060284_t01	Transcript	moderately similar to ( 284) AT1G75510 | Symbols: | transcription initiation factor IIF beta subunit (TFIIF-beta) family protein | chr1:28347254-28348629 REVERSEmoderately similar to ( 396) loc_os05g43450 12005.m08473 protein ATP binding protein, putative, expressed seq=cds; coord=8:122146971..122153390:1; parent_gene=GRMZM2G060284			1.32708
27.3.50	RNA.regulation of transcription.General Transcription	grmzm2g110116_t01	Transcript	moderately similar to ( 233) AT1G73230 | Symbols: | nascent polypeptide-associated complex (NAC) domain-containing protein | chr1:27540506-27541364 REVERSEmoderately similar to ( 269) loc_os03g01910 12003.m78794 protein transcription factor BTF3, putative, expressed seq=cds; coord=9:154640752..154643385:1; parent_gene=GRMZM2G110116			0.838619
27.3.50	RNA.regulation of transcription.General Transcription	grmzm5g800853_t01	Transcript	weakly similar to ( 106) AT3G25940 | Symbols: | transcription factor S-II (TFIIS) domain-containing protein | chr3:9495104-9495942 FORWARDweakly similar to ( 159) loc_os03g50380 12003.m10030 protein DNA-directed RNA polymerase I subunit 12, putative, expressed seq=cds; coord=1:267548371..267558789:-1; parent_gene=GRMZM5G800853			0.808287
27.3.50	RNA.regulation of transcription.General Transcription	grmzm2g019257_t01	Transcript	weakly similar to ( 130) loc_os03g62379 12003.m11114 protein DNA binding protein, putative, expressed seq=cds; coord=6:6015317..6016569:1; parent_gene=GRMZM2G019257			0.947585
27.3.50	RNA.regulation of transcription.General Transcription	grmzm2g041881_t01	Transcript	moderately similar to ( 215) AT1G73230 | Symbols: | nascent polypeptide-associated complex (NAC) domain-containing protein | chr1:27540506-27541364 REVERSEmoderately similar to ( 241) loc_os03g01910 12003.m78794 protein transcription factor BTF3, putative, expressed seq=cds; coord=1:2801080..2803977:-1; parent_gene=GRMZM2G041881			0.736067
27.3.50	RNA.regulation of transcription.General Transcription	grmzm2g025294_t01	Transcript	weakly similar to ( 154) AT5G09380 | Symbols: | DNA-directed RNA polymerase III RPC4 family protein | chr5:2911313-2913136 REVERSEmoderately similar to ( 281) loc_os04g32350 12004.m08333 protein DNA binding protein, putative, expressed seq=cds; coord=2:65854785..65859565:1; parent_gene=GRMZM2G025294			1.02419
Putative DNA-binding
BinCode	BinName	id	type	description	ra1	ra2	ra3
27.3.67	RNA.regulation of transcription.putative transcription regulator	grmzm2g124576_t01	Transcript	highly similar to ( 682) AT3G05060 | Symbols: | SAR DNA-binding protein, putative | chr3:1413174-1415564 REVERSEhighly similar to ( 801) loc_os03g22740 12003.m07672 protein nucleolar protein NOP5, putative, expressed seq=cds; coord=1:59670859..59675001:-1; parent_gene=GRMZM2G124576	-0.80424
27.3.67	RNA.regulation of transcription.putative transcription regulator	grmzm5g827026_t01	Transcript	highly similar to ( 627) AT1G02080 | Symbols: | transcriptional regulator-related | chr1:373694-386682 FORWARDnearly identical (1030) loc_os10g40780 12010.m21965 protein transcription regulator, putative, expressed seq=cds; coord=9:155365441..155376210:-1; parent_gene=GRMZM5G827026	0.89948	1.19862
27.3.67	RNA.regulation of transcription.putative transcription regulator	grmzm2g044856_t01	Transcript	weakly similar to ( 122) loc_os01g72450 12001.m13280 protein DNA-binding protein, putative, expressed seq=cds; coord=3:147936312..147938090:-1; parent_gene=GRMZM2G044856	-1.99335
27.3.67	RNA.regulation of transcription.putative transcription regulator	grmzm2g029096_t01	Transcript	weakly similar to ( 148) AT5G49700 | Symbols: | DNA-binding protein-related | chr5:20192599-20193429 FORWARDmoderately similar to ( 260) loc_os09g28930 12009.m06044 protein DNA-binding protein, putative seq=cds; coord=7:127716692..127718660:-1; parent_gene=GRMZM2G029096	-0.970065
27.3.67	RNA.regulation of transcription.putative transcription regulator	grmzm2g024054_t01	Transcript	moderately similar to ( 248) loc_os12g24080 12012.m06242 protein UPL2, putative, expressed seq=cds; coord=5:20984676..20990310:1; parent_gene=GRMZM2G024054	-0.393254
27.3.67	RNA.regulation of transcription.putative transcription regulator	grmzm2g144995_t01	Transcript	highly similar to ( 696) AT1G56110 | Symbols: NOP56 | NOP56 (Arabidopsis homolog of nucleolar protein Nop56) | chr1:20984544-20986893 REVERSEhighly similar to ( 814) loc_os03g22880 12003.m07686 protein nucleolar protein Nop56, putative, expressed seq=cds; coord=1:60216405..60219476:-1; parent_gene=GRMZM2G144995	-0.906376	-0.929426	-0.738534
27.3.67	RNA.regulation of transcription.putative transcription regulator	grmzm2g590333_t01	Transcript	weakly similar to ( 190) AT5G09850 | Symbols: | transcription elongation factor-related | chr5:3063488-3065221 REVERSEmoderately similar to ( 354) loc_os11g06650 12011.m04862 protein expressed protein seq=cds; coord=4:214908930..214913110:-1; parent_gene=GRMZM2G590333	-0.553934
27.3.67	RNA.regulation of transcription.putative transcription regulator	grmzm2g033480_t01	Transcript	weakly similar to ( 131) AT1G20900 | Symbols: ESC, ORE7, AHL27 | ESC (ESCAROLA); double-stranded DNA binding | chr1:7273024-7273959 FORWARDmoderately similar to ( 213) loc_os06g41860 12006.m08718 protein DNA-binding protein, putative, expressed seq=cds; coord=9:99364572..99365834:-1; parent_gene=GRMZM2G033480	-1.25803		0.807768
27.3.67	RNA.regulation of transcription.putative transcription regulator	grmzm2g006252_t01	Transcript	weakly similar to ( 185) AT4G12080 | Symbols: | DNA-binding family protein | chr4:7239466-7241246 FORWARDmoderately similar to ( 327) loc_os11g05160 12011.m04714 protein DNA binding protein, putative, expressed seq=cds; coord=4:187989803..187993020:1; parent_gene=GRMZM2G006252	-0.473804
27.3.67	RNA.regulation of transcription.putative transcription regulator	grmzm2g379428_t01	Transcript	weakly similar to ( 112) AT5G47430 | Symbols: | zinc ion binding | chr5:19235819-19240147 REVERSEmoderately similar to ( 352) loc_os03g45730 12003.m09596 protein zinc knuckle family protein, expressed seq=cds; coord=5:15203912..15207473:1; parent_gene=GRMZM2G379428	0.63522		0.90559
27.3.67	RNA.regulation of transcription.putative transcription regulator	grmzm2g375222_t01	Transcript	highly similar to ( 502) AT5G04290 | Symbols: KTF1 | KTF1 (KOW DOMAIN-CONTAINING TRANSCRIPTION FACTOR 1); nucleotide binding | chr5:1196069-1202653 FORWARDhighly similar to ( 619) loc_os05g43060 12005.m08436 protein NOWA1 protein, putative, expressed seq=cds; coord=8:122458204..122470831:-1; parent_gene=GRMZM2G375222	-0.645048		-0.893021
27.3.67	RNA.regulation of transcription.putative transcription regulator	grmzm2g153409_t01	Transcript	moderately similar to ( 203) AT5G09850 | Symbols: | transcription elongation factor-related | chr5:3063488-3065221 REVERSEmoderately similar to ( 405) loc_os12g06850 12012.m27023 protein expressed protein seq=cds; coord=10:8448574..8452123:-1; parent_gene=GRMZM2G153409	-0.986395
27.3.67	RNA.regulation of transcription.putative transcription regulator	grmzm2g017486_t01	Transcript	moderately similar to ( 374) AT3G50780 | Symbols: | INVOLVED IN: biological_process unknown; LOCATED IN: cellular_component unknown; EXPRESSED IN: 22 plant structures; EXPRESSED DURING: 13 growth stages; BEST Arabidopsis thaliana protein match is: PRLI-interacting factor-related (TAIR:AT1G63850.1); Has 173 Blast hits to 173 proteins in 14 species: Archae - 0; Bacteria - 0; Metazoa - 8; Fungi - 0;…	-0.991321
27.3.67	RNA.regulation of transcription.putative transcription regulator	ac225193.3_fgt003	Transcript	moderately similar to ( 216) AT2G33620 | Symbols: | DNA-binding family protein / AT-hook protein 1 (AHP1) | chr2:14234749-14236563 FORWARDmoderately similar to ( 385) loc_os10g42230 12010.m50380 protein AT-hook protein 1, putative, expressed seq=cds; coord=9:113056029..113059080:1; parent_gene=AC225193.3_FG003	-0.801983
27.3.67	RNA.regulation of transcription.putative transcription regulator	grmzm2g405559_t01	Transcript	weakly similar to ( 177) AT5G49700 | Symbols: | DNA-binding protein-related | chr5:20192599-20193429 FORWARDmoderately similar to ( 313) loc_os09g28930 12009.m06044 protein DNA-binding protein, putative seq=cds; coord=2:187276612..187277752:-1; parent_gene=GRMZM2G405559	-1.30362
27.3.67	RNA.regulation of transcription.putative transcription regulator	grmzm2g072274_t01	Transcript	weakly similar to ( 188) AT2G45430 | Symbols: | DNA-binding protein-related | chr2:18727848-18728801 FORWARDmoderately similar to ( 242) loc_os06g04540 12006.m05184 protein DNA-binding protein, putative, expressed seq=cds; coord=9:21965527..21967096:1; parent_gene=GRMZM2G072274	-1.39021
27.3.67	RNA.regulation of transcription.putative transcription regulator	grmzm5g824439_t01	Transcript	nearly identical (1251) AT1G23230 | Symbols: | unknown protein | chr1:8244481-8251741 FORWARDnearly identical (1826) loc_os02g49992 12002.m100352 protein expressed protein seq=cds; coord=5:204937877..204949337:-1; parent_gene=GRMZM5G824439	0.732964
27.3.67	RNA.regulation of transcription.putative transcription regulator	grmzm2g350628_t01	Transcript	weakly similar to ( 134) AT3G24870 | Symbols: | DNA binding | chr3:9075237-9084278 REVERSEmoderately similar to ( 479) loc_os08g08000 12008.m04936 protein DNA binding protein, putative, expressed seq=cds; coord=8:78189173..78193294:-1; parent_gene=GRMZM2G350628	0.592235
27.3.67	RNA.regulation of transcription.putative transcription regulator	grmzm2g024005_t01	Transcript	moderately similar to ( 207) AT4G35390 | Symbols: AGF1 | AGF1 (AT-hook protein of GA feedback 1); transcription factor | chr4:16829603-16830502 FORWARDmoderately similar to ( 276) loc_os02g48320 12002.m100338 protein DNA binding protein, putative, expressed seq=cds; coord=9:45638393..45639863:1; parent_gene=GRMZM2G024005	-0.743402
27.3.67	RNA.regulation of transcription.putative transcription regulator	grmzm2g178663_t01	Transcript	very weakly similar to (80.9) AT3G10820 | Symbols: | DNA binding / protein binding / transcription regulator | chr3:3387358-3389026 FORWARDweakly similar to ( 197) loc_os07g44820 12007.m08703 protein expressed protein seq=cds; coord=9:127645968..127649016:-1; parent_gene=GRMZM2G178663	-0.682633
27.3.67	RNA.regulation of transcription.putative transcription regulator	grmzm2g051522_t01	Transcript	moderately similar to ( 233) loc_os01g20030 12001.m08538 protein expressed protein seq=cds; coord=8:34663114..34664566:-1; parent_gene=GRMZM2G051522	-1.26925
27.3.67	RNA.regulation of transcription.putative transcription regulator	grmzm2g130366_t01	Transcript	moderately similar to ( 484) AT1G80270 | Symbols: | DNA-binding protein, putative | chr1:30181265-30183331 FORWARDvery weakly similar to (88.6) RF1_ORYSA Rf1 protein, mitochondrial precursor (PPR protein) (Fertility restorer) (Restorer for CMS) - Oryza sativa (Rice)highly similar to ( 808) loc_os12g07260 12012.m04715 protein DNA-binding protein, putative, expressed seq=cds; coord=3:46129464..4613…		0.99795	0.779849
27.3.67	RNA.regulation of transcription.putative transcription regulator	grmzm2g352891_t01	Transcript	moderately similar to ( 226) AT5G60170 | Symbols: | RNA binding / nucleic acid binding / nucleotide binding / protein binding / zinc ion binding | chr5:24228178-24232394 FORWARDmoderately similar to ( 268) loc_os01g11130 12001.m07733 protein expressed protein seq=cds; coord=3:4140024..4147865:1; parent_gene=GRMZM2G352891		0.737453
27.3.67	RNA.regulation of transcription.putative transcription regulator	grmzm2g045544_t01	Transcript	weakly similar to ( 188) AT3G20280 | Symbols: | PHD finger family protein | chr3:7072892-7074340 FORWARDmoderately similar to ( 493) loc_os02g48810 12002.m09915 protein PHD-finger family protein, expressed seq=cds; coord=5:203646189..203650857:1; parent_gene=GRMZM2G045544		0.85659
27.3.67	RNA.regulation of transcription.putative transcription regulator	grmzm2g153725_t01	Transcript	moderately similar to ( 353) AT1G59453 | Symbols: | transcription factor-related | chr1:21846902-21853384 REVERSEhighly similar to ( 962) loc_os02g42200 12002.m100290 protein expressed protein seq=cds; coord=5:187314274..187319912:-1; parent_gene=GRMZM2G153725		0.980255	0.877408
27.3.67	RNA.regulation of transcription.putative transcription regulator	grmzm5g873335_t01	Transcript	very weakly similar to ( 100) AT3G43240 | Symbols: | ARID/BRIGHT DNA-binding domain-containing protein | chr3:15210032-15214440 REVERSEweakly similar to ( 166) loc_os09g26390 12009.m059981 protein DNA binding protein, putative, expressed seq=cds; coord=7:120254480..120256169:-1; parent_gene=GRMZM5G873335		1.65298
27.3.67	RNA.regulation of transcription.putative transcription regulator	grmzm2g132644_t01	Transcript	moderately similar to ( 368) AT4G38480 | Symbols: | transducin family protein / WD-40 repeat family protein | chr4:18003957-18006002 FORWARDhighly similar to ( 555) loc_os06g50880 12006.m09612 protein nucleotide binding protein, putative, expressed seq=cds; coord=6:83217298..83220316:1; parent_gene=GRMZM2G132644		0.899064
27.3.67	RNA.regulation of transcription.putative transcription regulator	grmzm2g138976_t01	Transcript	moderately similar to ( 397) AT3G43240 | Symbols: | ARID/BRIGHT DNA-binding domain-containing protein | chr3:15210032-15214440 REVERSEhighly similar to ( 543) loc_os09g26390 12009.m059981 protein DNA binding protein, putative, expressed seq=cds; coord=7:120204741..120251583:-1; parent_gene=GRMZM2G138976		1.26436	1.02016
27.3.67	RNA.regulation of transcription.putative transcription regulator	grmzm2g400238_t01	Transcript	moderately similar to ( 397) AT5G60170 | Symbols: | RNA binding / nucleic acid binding / nucleotide binding / protein binding / zinc ion binding | chr5:24228178-24232394 FORWARDnearly identical (1032) loc_os12g01190 12012.m26794 protein RNA recognition motif family protein, expressed seq=cds; coord=3:229196272..229210983:1; parent_gene=GRMZM2G400238		0.736881
27.3.67	RNA.regulation of transcription.putative transcription regulator	grmzm2g439819_t01	Transcript	moderately similar to ( 279) AT1G68580 | Symbols: | agenet domain-containing protein / bromo-adjacent homology (BAH) domain-containing protein | chr1:25752869-25755631 FORWARDweakly similar to ( 167) CDC2_MAIZE Cell division control protein 2 homolog (EC 2.7.11.22) (EC 2.7.11.23) (p34cdc2) - Zea mays (Maize)moderately similar to ( 481) loc_os08g33420 12008.m07332 protein agenet domain containing …		1.58584
27.3.67	RNA.regulation of transcription.putative transcription regulator	grmzm2g070831_t01	Transcript	highly similar to ( 523) AT3G05060 | Symbols: | SAR DNA-binding protein, putative | chr3:1413174-1415564 REVERSEhighly similar to ( 583) loc_os03g22740 12003.m07672 protein nucleolar protein NOP5, putative, expressed seq=cds; coord=2:225766169..225769071:1; parent_gene=GRMZM2G070831		1.24334	1.34011
27.3.67	RNA.regulation of transcription.putative transcription regulator	grmzm2g030523_t01	Transcript	moderately similar to ( 459) AT2G29570 | Symbols: PCNA2, ATPCNA2 | PCNA2 (PROLIFERATING CELL NUCLEAR ANTIGEN 2); DNA binding / DNA polymerase processivity factor | chr2:12650139-12651598 REVERSEhighly similar to ( 513) PCNA_MAIZE Proliferating cell nuclear antigen (PCNA) - Zea mays (Maize)moderately similar to ( 492) loc_os02g56130 12002.m10637 protein proliferating cell nuclear antigen, putative…		1.02448	1.0496
27.3.67	RNA.regulation of transcription.putative transcription regulator	grmzm2g035996_t01	Transcript	highly similar to ( 581) AT1G67370 | Symbols: ASY1, ATASY1 | ASY1 (ASYNAPTIC 1); DNA binding | chr1:25239347-25243713 REVERSEweakly similar to ( 147) MSK3_MEDSA Glycogen synthase kinase-3 homolog MsK-3 (EC 2.7.11.1) - Medicago sativa (Alfalfa)highly similar to ( 910) loc_os09g32930 12009.m22009 protein retrotransposon protein, putative, SINE subclass, expressed seq=cds; coord=2:192090103..1921105…		0.986199	1.26665
27.3.67	RNA.regulation of transcription.putative transcription regulator	grmzm2g164835_t01	Transcript	highly similar to ( 813) AT1G30680 | Symbols: | toprim domain-containing protein | chr1:10881665-10886060 FORWARDnearly identical (1098) loc_os06g45980 12006.m09126 protein nucleic acid binding protein, putative, expressed seq=cds; coord=6:92610561..92616400:1; parent_gene=GRMZM2G164835		1.28611	0.809925
27.3.67	RNA.regulation of transcription.putative transcription regulator	grmzm2g034453_t01	Transcript	very weakly similar to (94.0) AT3G52170 | Symbols: | DNA binding | chr3:19347039-19349099 REVERSEmoderately similar to ( 362) loc_os12g34350 12012.m07229 protein expressed protein seq=cds; coord=3:133487481..133497532:1; parent_gene=GRMZM2G034453		1.46217	1.08951
27.3.67	RNA.regulation of transcription.putative transcription regulator	grmzm2g319022_t01	Transcript	weakly similar to ( 181) AT2G19260 | Symbols: | ELM2 domain-containing protein / PHD finger family protein | chr2:8357331-8359931 FORWARDhighly similar to ( 596) loc_os04g34720 12004.m08565 protein DNA binding protein, putative, expressed seq=cds; coord=1:5719544..5740638:1; parent_gene=GRMZM2G319022		1.05678
27.3.67	RNA.regulation of transcription.putative transcription regulator	grmzm2g140156_t01	Transcript	highly similar to ( 815) AT3G43240 | Symbols: | ARID/BRIGHT DNA-binding domain-containing protein | chr3:15210032-15214440 REVERSEnearly identical (1342) loc_os09g26390 12009.m059981 protein DNA binding protein, putative, expressed seq=cds; coord=2:183392279..183403901:-1; parent_gene=GRMZM2G140156		1.31936
27.3.67	RNA.regulation of transcription.putative transcription regulator	grmzm2g052688_t01	Transcript	moderately similar to ( 395) AT1G04020 | Symbols: ATBARD1, BARD1 | BARD1 (BREAST CANCER ASSOCIATED RING 1); DNA binding / transcription coactivator | chr1:1036610-1040045 FORWARDhighly similar to ( 882) loc_os04g43300 12004.m09294 protein ATBRCA1, putative, expressed seq=cds; coord=2:28673566..28677785:-1; parent_gene=GRMZM2G052688		1.06915	1.0155
27.3.67	RNA.regulation of transcription.putative transcription regulator	grmzm2g066456_t01	Transcript	moderately similar to ( 397) AT5G27460 | Symbols: | pentatricopeptide (PPR) repeat-containing protein | chr5:9693262-9694815 REVERSEhighly similar to ( 705) loc_os02g55310 12002.m10557 protein expressed protein seq=cds; coord=4:173859838..173862219:1; parent_gene=GRMZM2G066456		1.109	0.828829
27.3.67	RNA.regulation of transcription.putative transcription regulator	grmzm2g005844_t01	Transcript	moderately similar to ( 377) AT1G19340 | Symbols: | methyltransferase MT-A70 family protein | chr1:6684798-6686798 FORWARDhighly similar to ( 553) loc_os03g10224 12003.m101695 protein S-adenosylmethionine-dependent methyltransferase/ methyltransferase, putative, expressed seq=cds; coord=1:23216683..23224896:1; parent_gene=GRMZM2G005844		1.34274
27.3.67	RNA.regulation of transcription.putative transcription regulator	grmzm2g388253_t01	Transcript	moderately similar to ( 243) AT5G55390 | Symbols: EDM2 | EDM2; transcription factor | chr5:22448152-22454414 REVERSEmoderately similar to ( 363) loc_os08g24946 12008.m62003 protein expressed protein seq=cds; coord=7:76540625..76544739:1; parent_gene=GRMZM2G388253		1.42222
27.3.67	RNA.regulation of transcription.putative transcription regulator	grmzm2g063603_t01	Transcript	moderately similar to ( 483) AT5G10940 | Symbols: | transducin family protein / WD-40 repeat family protein | chr5:3448890-3454127 REVERSEhighly similar to ( 747) loc_os03g08830 12003.m06389 protein expressed protein seq=cds; coord=9:149806803..149813920:-1; parent_gene=GRMZM2G063603		1.28496	0.925317
27.3.67	RNA.regulation of transcription.putative transcription regulator	grmzm2g095326_t01	Transcript	nearly identical (1699) AT2G26780 | Symbols: | binding | chr2:11410125-11423598 FORWARDnearly identical (2487) loc_os11g04220 12011.m04618 protein HEAT repeat family protein, expressed seq=cds; coord=4:186660384..186710764:-1; parent_gene=GRMZM2G095326		0.969262
27.3.67	RNA.regulation of transcription.putative transcription regulator	grmzm5g813111_t01	Transcript	moderately similar to ( 333) AT1G54390 | Symbols: ING2 | PHD finger protein-related | chr1:20305061-20306510 REVERSEmoderately similar to ( 456) loc_os03g53700 12003.m35410 protein inhibitor of growth protein 4, putative, expressed seq=cds; coord=1:276110228..276115825:1; parent_gene=GRMZM5G813111		0.853239	0.622325
27.3.67	RNA.regulation of transcription.putative transcription regulator	ac197122.3_fgt003	Transcript	moderately similar to ( 402) AT5G18230 | Symbols: | transcription regulator NOT2/NOT3/NOT5 family protein | chr5:6021610-6027031 REVERSEhighly similar to ( 706) loc_os03g44900 12003.m35336 protein CCR4-NOT transcription complex subunit 3, putative, expressed seq=cds; coord=5:15703665..15718967:1; parent_gene=AC197122.3_FG003		1.06887
27.3.67	RNA.regulation of transcription.putative transcription regulator	grmzm2g330024_t01	Transcript	moderately similar to ( 434) AT1G77800 | Symbols: | PHD finger family protein | chr1:29253800-29260190 FORWARDnearly identical (1159) loc_os06g10690 12006.m32013 protein C1-like domain containing protein, expressed seq=cds; coord=6:109391739..109405354:-1; parent_gene=GRMZM2G330024		0.81643
27.3.67	RNA.regulation of transcription.putative transcription regulator	grmzm2g155123_t01	Transcript	moderately similar to ( 404) AT5G60410 | Symbols: ATSIZ1, SIZ1 | SIZ1; DNA binding / SUMO ligase | chr5:24295226-24300792 FORWARDhighly similar to ( 541) loc_os05g03430 12005.m083605 protein sumoylation ligase E3, putative, expressed seq=cds; coord=8:131577644..131584809:-1; parent_gene=GRMZM2G155123		0.792555	0.582073
27.3.67	RNA.regulation of transcription.putative transcription regulator	grmzm2g171006_t01	Transcript	very weakly similar to (92.0) AT3G52170 | Symbols: | DNA binding | chr3:19347039-19349099 REVERSEmoderately similar to ( 347) loc_os12g34350 12012.m07229 protein expressed protein seq=cds; coord=10:27122336..27126975:1; parent_gene=GRMZM2G171006		0.949027	0.78726
27.3.67	RNA.regulation of transcription.putative transcription regulator	grmzm2g100246_t01	Transcript	moderately similar to ( 307) AT5G18230 | Symbols: | transcription regulator NOT2/NOT3/NOT5 family protein | chr5:6021610-6027031 REVERSEmoderately similar to ( 441) loc_os03g44900 12003.m35336 protein CCR4-NOT transcription complex subunit 3, putative, expressed seq=cds; coord=5:15725881..15731553:1; parent_gene=GRMZM2G100246		1.2094	1.03299
27.3.67	RNA.regulation of transcription.putative transcription regulator	grmzm2g015090_t01	Transcript	moderately similar to ( 332) AT3G15410 | Symbols: | leucine-rich repeat family protein | chr3:5203380-5207279 FORWARDmoderately similar to ( 482) loc_os02g58030 12002.m10824 protein leucine-rich repeat-containing protein 40, putative, expressed seq=cds; coord=5:216546408..216551819:-1; parent_gene=GRMZM2G015090		1.25781	1.05477
27.3.67	RNA.regulation of transcription.putative transcription regulator	grmzm2g106017_t01	Transcript	moderately similar to ( 309) AT5G10940 | Symbols: | transducin family protein / WD-40 repeat family protein | chr5:3448890-3454127 REVERSEmoderately similar to ( 343) loc_os03g08830 12003.m06389 protein expressed protein seq=cds; coord=1:18433097..18437566:1; parent_gene=GRMZM2G106017		1.25026
27.3.67	RNA.regulation of transcription.putative transcription regulator	grmzm2g361615_t01	Transcript	moderately similar to ( 383) AT1G80270 | Symbols: | DNA-binding protein, putative | chr1:30181265-30183331 FORWARDhighly similar to ( 567) loc_os07g12140 12007.m05667 protein DNA-binding protein, putative, expressed seq=cds; coord=7:19824652..19832646:1; parent_gene=GRMZM2G361615		1.24888
27.3.67	RNA.regulation of transcription.putative transcription regulator	grmzm2g038374_t01	Transcript	moderately similar to ( 437) AT5G25520 | Symbols: | transcription elongation factor-related | chr5:8885550-8889484 FORWARDnearly identical (1231) loc_os02g11780 12002.m06427 protein transcription factor S-II, central domain containing protein, expressed seq=cds; coord=5:157462447..157468660:-1; parent_gene=GRMZM2G038374		-0.859743	-1.11246
27.3.67	RNA.regulation of transcription.putative transcription regulator	grmzm2g411032_t01	Transcript	weakly similar to ( 181) AT3G20280 | Symbols: | PHD finger family protein | chr3:7072892-7074340 FORWARDhighly similar to ( 540) loc_os02g48810 12002.m09915 protein PHD-finger family protein, expressed seq=cds; coord=4:163892981..163897431:1; parent_gene=GRMZM2G411032		0.859429
27.3.67	RNA.regulation of transcription.putative transcription regulator	grmzm2g179411_t01	Transcript	moderately similar to ( 469) AT3G45620 | Symbols: | transducin family protein / WD-40 repeat family protein | chr3:16745918-16747993 FORWARDhighly similar to ( 685) loc_os03g17780 12003.m07203 protein WD domain containing protein, putative, expressed seq=cds; coord=1:43971021..43974939:1; parent_gene=GRMZM2G179411		1.04824	0.836854
27.3.67	RNA.regulation of transcription.putative transcription regulator	grmzm2g065292_t01	Transcript	moderately similar to ( 437) AT3G11330 | Symbols: | leucine-rich repeat family protein | chr3:3552330-3554695 REVERSEvery weakly similar to (81.3) RPK1_IPONI Receptor-like protein kinase precursor (EC 2.7.11.1) - Ipomoea nil (Japanese morning glory) (Pharbitis nil)highly similar to ( 656) loc_os04g40080 12004.m08992 protein protein lap1, putative, expressed seq=cds; coord=10:125125070..125130397:…			0.829309
27.3.67	RNA.regulation of transcription.putative transcription regulator	grmzm2g157574_t01	Transcript	weakly similar to ( 117) AT1G68730 | Symbols: | zinc finger (DNL type) family protein | chr1:25810321-25811128 REVERSEweakly similar to ( 160) loc_os01g42050 12001.m10471 protein zinc ribbon 1, putative seq=cds; coord=3:223739197..223740961:-1; parent_gene=GRMZM2G157574			1.09654
27.3.67	RNA.regulation of transcription.putative transcription regulator	ac234160.1_fgt001	Transcript	moderately similar to ( 249) AT1G70060 | Symbols: SNL4 | SNL4 (SIN3-LIKE 4) | chr1:26383789-26389568 FORWARDmoderately similar to ( 338) loc_os01g01960 12001.m06838 protein paired amphipathic helix repeat family protein, expressed seq=cds; coord=8:8136058..8139636:-1; parent_gene=AC234160.1_FG001			-0.820379
27.3.67	RNA.regulation of transcription.putative transcription regulator	grmzm2g070831_t01	Transcript	highly similar to ( 523) AT3G05060 | Symbols: | SAR DNA-binding protein, putative | chr3:1413174-1415564 REVERSEhighly similar to ( 583) loc_os03g22740 12003.m07672 protein nucleolar protein NOP5, putative, expressed seq=cds; coord=2:225766169..225769071:1; parent_gene=GRMZM2G070831			1.34011
27.3.67	RNA.regulation of transcription.putative transcription regulator	grmzm2g155662_t01	Transcript	moderately similar to ( 271) AT2G02740 | Symbols: ATWHY3, PTAC11, WHY3 | WHY3 (WHIRLY 3); DNA binding | chr2:769389-770993 FORWARDmoderately similar to ( 355) loc_os06g05350 12006.m05264 protein DNA-binding protein p24, putative, expressed seq=cds; coord=6:71618436..71621497:-1; parent_gene=GRMZM2G155662			0.731196
27.3.67	RNA.regulation of transcription.putative transcription regulator	grmzm2g081949_t01	Transcript	weakly similar to ( 119) AT2G41870 | Symbols: | remorin family protein | chr2:17471119-17472519 REVERSEmoderately similar to ( 211) loc_os07g38170 12007.m08065 protein DNA binding protein, putative, expressed seq=cds; coord=7:158934379..158936038:-1; parent_gene=GRMZM2G081949			1.09843
27.3.67	RNA.regulation of transcription.putative transcription regulator	grmzm2g110116_t01	Transcript	moderately similar to ( 233) AT1G73230 | Symbols: | nascent polypeptide-associated complex (NAC) domain-containing protein | chr1:27540506-27541364 REVERSEmoderately similar to ( 269) loc_os03g01910 12003.m78794 protein transcription factor BTF3, putative, expressed seq=cds; coord=9:154640752..154643385:1; parent_gene=GRMZM2G110116			0.838619
27.3.67	RNA.regulation of transcription.putative transcription regulator	grmzm2g337659_t01	Transcript	moderately similar to ( 298) AT5G60410 | Symbols: ATSIZ1, SIZ1 | SIZ1; DNA binding / SUMO ligase | chr5:24295226-24300792 FORWARDhighly similar to ( 643) loc_os05g03430 12005.m083605 protein sumoylation ligase E3, putative, expressed seq=cds; coord=6:27504390..27517569:-1; parent_gene=GRMZM2G337659			1.3127
27.3.67	RNA.regulation of transcription.putative transcription regulator	grmzm5g883043_t01	Transcript	moderately similar to ( 350) AT1G23230 | Symbols: | unknown protein | chr1:8244481-8251741 FORWARDmoderately similar to ( 477) loc_os02g49992 12002.m100352 protein expressed protein seq=cds; coord=5:204926728..204932698:-1; parent_gene=GRMZM5G883043			0.869542
27.3.67	RNA.regulation of transcription.putative transcription regulator	grmzm2g111906_t01	Transcript	moderately similar to ( 384) loc_os06g08290 12006.m091622 protein terminal acidic SANT 1, putative, expressed seq=cds; coord=6:82497057..82500132:1; parent_gene=GRMZM2G111906			0.520328
27.3.67	RNA.regulation of transcription.putative transcription regulator	grmzm2g577677_t01	Transcript	moderately similar to ( 240) AT4G21860 | Symbols: MSRB2 | MSRB2 (methionine sulfoxide reductase B 2); peptide-methionine-(S)-S-oxide reductase | chr4:11600282-11601507 REVERSEmoderately similar to ( 270) loc_os03g24600 12003.m35241 protein peptide methionine sulfoxide reductase msrB, putative, expressed seq=cds; coord=1:62530194..62532719:1; parent_gene=GRMZM2G577677			0.795382
27.3.67	RNA.regulation of transcription.putative transcription regulator	grmzm2g016546_t01	Transcript	moderately similar to ( 260) AT3G58470 | Symbols: | methyltransferase/ nucleic acid binding | chr3:21627070-21628507 REVERSEmoderately similar to ( 355) loc_os03g53890 12003.m10354 protein expressed protein seq=cds; coord=1:276361596..276364100:1; parent_gene=GRMZM2G016546			0.823457
27.3.67	RNA.regulation of transcription.putative transcription regulator	grmzm5g897604_t01	Transcript	weakly similar to ( 156) loc_os03g45730 12003.m09596 protein zinc knuckle family protein, expressed seq=cds; coord=5:15207477..15208970:1; parent_gene=GRMZM5G897604			0.910098
27.3.67	RNA.regulation of transcription.putative transcription regulator	grmzm2g108712_t01	Transcript	moderately similar to ( 337) AT2G29570 | Symbols: PCNA2, ATPCNA2 | PCNA2 (PROLIFERATING CELL NUCLEAR ANTIGEN 2); DNA binding / DNA polymerase processivity factor | chr2:12650139-12651598 REVERSEmoderately similar to ( 369) PCNA_MAIZE Proliferating cell nuclear antigen (PCNA) - Zea mays (Maize)moderately similar to ( 360) loc_os02g56130 12002.m10637 protein proliferating cell nuclear antigen, puta…			0.906844
27.3.67	RNA.regulation of transcription.putative transcription regulator	grmzm2g075096_t01	Transcript	moderately similar to ( 386) AT1G59453 | Symbols: | transcription factor-related | chr1:21846902-21853384 REVERSEhighly similar to ( 914) loc_os02g42200 12002.m100290 protein expressed protein seq=cds; coord=5:207198225..207208324:1; parent_gene=GRMZM2G075096			1.14628
27.3.67	RNA.regulation of transcription.putative transcription regulator	grmzm2g135940_t01	Transcript	moderately similar to ( 402) AT4G21705 | Symbols: | pentatricopeptide (PPR) repeat-containing protein | chr4:11533257-11534817 REVERSEhighly similar to ( 731) loc_os07g40750 12007.m08315 protein tetratricopeptide-like helical, putative, expressed seq=cds; coord=5:24376529..24378976:1; parent_gene=GRMZM2G135940			0.652415
ORPHAN
BinCode	BinName	id	type	description	ra1	ra2	ra3
27.3.34	RNA.regulation of transcription.Orphan family	grmzm2g476107_t01	Transcript	highly similar to ( 621) AT1G01510 | Symbols: AN | AN (ANGUSTIFOLIA); protein binding | chr1:187235-189836 FORWARDhighly similar to ( 769) loc_os10g38900 12010.m06657 protein angustifolia, putative, expressed seq=cds; coord=1:5445094..5451321:-1; parent_gene=GRMZM2G476107	-0.9154
27.3.34	RNA.regulation of transcription.Orphan family	grmzm2g418294_t01	Transcript	highly similar to ( 644) AT1G01510 | Symbols: AN | AN (ANGUSTIFOLIA); protein binding | chr1:187235-189836 FORWARDhighly similar to ( 888) loc_os10g38900 12010.m06657 protein angustifolia, putative, expressed seq=cds; coord=1:82377498..82387540:1; parent_gene=GRMZM2G418294		0.964556
27.3.34	RNA.regulation of transcription.Orphan family	grmzm2g106233_t01	Transcript	moderately similar to ( 362) AT3G16000 | Symbols: MFP1 | MFP1 (MAR BINDING FILAMENT-LIKE PROTEIN 1); DNA binding | chr3:5431041-5433613 REVERSEmoderately similar to ( 376) MFP1_TOBAC MAR-binding filament-like protein 1-1 - Nicotiana tabacum (Common tobacco)highly similar to ( 759) loc_os05g08790 12005.m05393 protein MAR binding filament-like protein 1, putative, expressed seq=cds; coord=6:1307537…		0.941637
Argonaute
BinCode	BinName	id	type	description	ra1	ra2	ra3
27.3.36	RNA.regulation of transcription.Argonaute	ac199001.3_fgt005	Transcript	moderately similar to ( 308) AT1G48410 | Symbols: AGO1 | AGO1 (ARGONAUTE 1); endoribonuclease/ miRNA binding / protein binding / siRNA binding | chr1:17886285-17891892 REVERSEmoderately similar to ( 396) loc_os04g47870 12004.m09728 protein PINHEAD protein, putative, expressed seq=cds; coord=8:134902882..134904730:1; parent_gene=AC199001.3_FG005	0.642176
27.3.36	RNA.regulation of transcription.Argonaute	grmzm2g347402_t01	Transcript	highly similar to ( 691) AT2G27040 | Symbols: AGO4, OCP11 | AGO4 (ARGONAUTE 4); nucleic acid binding | chr2:11536795-11541503 REVERSEhighly similar to ( 702) loc_os01g16870 12001.m150417 protein argonaute-like protein, putative, expressed seq=cds; coord=7:72026102..72035106:-1; parent_gene=GRMZM2G347402	0.937124	1.53441
27.3.36	RNA.regulation of transcription.Argonaute	grmzm2g048335_t01	Transcript	weakly similar to ( 155) AT2G27040 | Symbols: AGO4, OCP11 | AGO4 (ARGONAUTE 4); nucleic acid binding | chr2:11536795-11541503 REVERSEmoderately similar to ( 242) loc_os01g16870 12001.m150417 protein argonaute-like protein, putative, expressed seq=cds; coord=3:43658188..43660813:-1; parent_gene=GRMZM2G048335		1.07584
27.3.36	RNA.regulation of transcription.Argonaute	grmzm2g469673_t01	Transcript	very weakly similar to (90.1) loc_os01g16870 12001.m150417 protein argonaute-like protein, putative, expressed seq=cds; coord=3:43657459..43657992:-1; parent_gene=GRMZM2G469673		1.61125
27.3.36	RNA.regulation of transcription.Argonaute	grmzm2g432075_t01	Transcript	moderately similar to ( 346) AT2G32940 | Symbols: AGO6 | AGO6 (ARGONAUTE 6); nucleic acid binding | chr2:13972218-13976856 REVERSEmoderately similar to ( 432) loc_os07g16224 12007.m06064 protein argonaute-like protein, putative, expressed seq=cds; coord=7:71981965..71989975:-1; parent_gene=GRMZM2G432075			1.14427
Bromodomain
BinCode	BinName	id	type	description	ra1	ra2	ra3
27.3.42	RNA.regulation of transcription.Bromodomain proteins	grmzm2g022499_t01	Transcript	weakly similar to ( 128) AT2G44430 | Symbols: | DNA-binding bromodomain-containing protein | chr2:18333603-18336165 FORWARDmoderately similar to ( 353) loc_os08g39980 12008.m07978 protein DNA binding protein, putative, expressed seq=cds; coord=1:188457694..188461344:-1; parent_gene=GRMZM2G022499	-0.970298
27.3.42	RNA.regulation of transcription.Bromodomain proteins	grmzm2g103783_t01	Transcript	weakly similar to ( 181) loc_os09g31454 12009.m06264 protein myb-like DNA-binding domain containing protein, expressed seq=cds; coord=7:133369333..133372212:-1; parent_gene=GRMZM2G103783	-0.837504		-0.663113
27.3.42	RNA.regulation of transcription.Bromodomain proteins	grmzm2g044044_t01	Transcript	weakly similar to ( 177) AT5G55040 | Symbols: | DNA binding | chr5:22327727-22331703 REVERSEweakly similar to ( 171) loc_os09g37760 12009.m06723 protein DNA binding protein, putative, expressed seq=cds; coord=7:152684996..152692349:1; parent_gene=GRMZM2G044044		1.14581	0.708216
27.3.42	RNA.regulation of transcription.Bromodomain proteins	grmzm2g020548_t01	Transcript	weakly similar to ( 147) AT1G20670 | Symbols: | DNA-binding bromodomain-containing protein | chr1:7164537-7167933 REVERSEweakly similar to ( 182) loc_os09g37760 12009.m06723 protein DNA binding protein, putative, expressed seq=cds; coord=1:7040786..7046535:1; parent_gene=GRMZM2G020548		0.761351	0.607088
27.3.42	RNA.regulation of transcription.Bromodomain proteins	grmzm2g336962_t01	Transcript	weakly similar to ( 172) AT5G55040 | Symbols: | DNA binding | chr5:22327727-22331703 REVERSEweakly similar to ( 164) loc_os09g37760 12009.m06723 protein DNA binding protein, putative, expressed seq=cds; coord=2:202729116..202736554:1; parent_gene=GRMZM2G336962		1.32857	0.932639
27.3.42	RNA.regulation of transcription.Bromodomain proteins	grmzm2g312501_t01	Transcript	weakly similar to ( 179) AT1G20670 | Symbols: | DNA-binding bromodomain-containing protein | chr1:7164537-7167933 REVERSEhighly similar to ( 524) loc_os09g37760 12009.m06723 protein DNA binding protein, putative, expressed seq=cds; coord=2:197524774..197529340:-1; parent_gene=GRMZM2G312501			0.647446
Chromatin remodeling
BinCode	BinName	id	type	description	ra1	ra2	ra3
27.3.44	RNA.regulation of transcription.Chromatin Remodeling Factors	grmzm2g324162_t01	Transcript	seq=cds; coord=4:239129384..239130094:-1; parent_gene=GRMZM2G324162	-0.893107
27.3.44	RNA.regulation of transcription.Chromatin Remodeling Factors	grmzm2g143788_t01	Transcript	very weakly similar to ( 100) AT4G34290 | Symbols: | SWIB complex BAF60b domain-containing protein | chr4:16410883-16412122 FORWARDweakly similar to ( 162) loc_os12g32280 12012.m07033 protein expressed protein seq=cds; coord=6:22918021..22921799:-1; parent_gene=GRMZM2G143788	-0.785305
27.3.44	RNA.regulation of transcription.Chromatin Remodeling Factors	grmzm2g070264_t01	Transcript	nearly identical (1396) AT2G18760 | Symbols: CHR8 | CHR8 (chromatin remodeling 8); ATP binding / DNA binding / helicase/ nucleic acid binding | chr2:8129154-8133502 FORWARDmoderately similar to ( 267) ISW2_ORYSA Probable chromatin remodelling complex ATPase chain (EC 3.6.1.-) (ISW2-like) (Sucrose nonfermenting protein 2 homolog) - Oryza sativa (Rice)nearly identical (1761) loc_os01g01312 12001.m0…		1.23239	1.04859
27.3.44	RNA.regulation of transcription.Chromatin Remodeling Factors	grmzm2g135410_t01	Transcript	moderately similar to ( 301) AT2G47620 | Symbols: ATSWI3A, CHB1 | ATSWI3A (SWITCH/SUCROSE NONFERMENTING 3A); DNA binding | chr2:19532034-19534251 FORWARDhighly similar to ( 689) loc_os04g40420 12004.m35048 protein ATSWI3A, putative, expressed seq=cds; coord=2:37196851..37201490:-1; parent_gene=GRMZM2G135410		0.916696	0.9145
27.3.44	RNA.regulation of transcription.Chromatin Remodeling Factors	grmzm2g313553_t01	Transcript	highly similar to ( 521) AT5G07810 | Symbols: | SNF2 domain-containing protein / helicase domain-containing protein / HNH endonuclease domain-containing protein | chr5:2491412-2498484 REVERSEhighly similar to ( 875) loc_os07g40730 12007.m079739 protein ATP binding protein, putative, expressed seq=cds; coord=7:163214920..163233302:1; parent_gene=GRMZM2G313553		1.47814
27.3.44	RNA.regulation of transcription.Chromatin Remodeling Factors	grmzm2g168096_t01	Transcript	nearly identical (2159) AT3G54280 | Symbols: CHR16, CHA16, RGD3, ATBTAF1, BTAF1 | RGD3 (ROOT GROWTH DEFECTIVE 3); ATP binding / DNA binding / binding / helicase/ nucleic acid binding | chr3:20092361-20103807 FORWARDmoderately similar to ( 208) ISW2_ORYSA Probable chromatin remodelling complex ATPase chain (EC 3.6.1.-) (ISW2-like) (Sucrose nonfermenting protein 2 homolog) - Oryza sativa (Rice)high…		1.16649	0.889699
27.3.44	RNA.regulation of transcription.Chromatin Remodeling Factors	grmzm2g469162_t01	Transcript	nearly identical (1486) AT3G57300 | Symbols: INO80, ATINO80 | INO80 (INO80 ORTHOLOG); ATP binding / DNA binding / helicase/ nucleic acid binding | chr3:21199612-21207635 FORWARDmoderately similar to ( 246) ISW2_ORYSA Probable chromatin remodelling complex ATPase chain (EC 3.6.1.-) (ISW2-like) (Sucrose nonfermenting protein 2 homolog) - Oryza sativa (Rice)nearly identical (1994) loc_os03g22900 120…		1.12552
27.3.44	RNA.regulation of transcription.Chromatin Remodeling Factors	grmzm2g138125_t01	Transcript	highly similar to ( 818) AT5G63950 | Symbols: CHR24 | CHR24 (chromatin remodeling 24); ATP binding / DNA binding / helicase/ nucleic acid binding | chr5:25592160-25598405 REVERSEmoderately similar to ( 203) ISW2_ORYSA Probable chromatin remodelling complex ATPase chain (EC 3.6.1.-) (ISW2-like) (Sucrose nonfermenting protein 2 homolog) - Oryza sativa (Rice)highly similar to ( 892) loc_os04g59624 1…		0.86509
27.3.44	RNA.regulation of transcription.Chromatin Remodeling Factors	grmzm5g817934_t01	Transcript	very weakly similar to (84.0) AT3G19080 | Symbols: | SWIB complex BAF60b domain-containing protein | chr3:6596082-6598667 FORWARDweakly similar to ( 112) loc_os03g55570 12003.m10470 protein SWIB/MDM2 domain containing protein, expressed seq=cds; coord=1:280205429..280209358:1; parent_gene=GRMZM5G817934		1.71233	1.99602
27.3.44	RNA.regulation of transcription.Chromatin Remodeling Factors	grmzm2g154946_t01	Transcript	highly similar to ( 602) AT1G05490 | Symbols: chr31 | chr31 (chromatin remodeling 31); ATP binding / DNA binding / helicase/ nucleic acid binding | chr1:1618795-1623195 REVERSEweakly similar to ( 114) ISW2_ORYSA Probable chromatin remodelling complex ATPase chain (EC 3.6.1.-) (ISW2-like) (Sucrose nonfermenting protein 2 homolog) - Oryza sativa (Rice)nearly identical (1626) loc_os05g32610 12005.m0…		0.945556
27.3.44	RNA.regulation of transcription.Chromatin Remodeling Factors	grmzm5g829297_t01	Transcript	moderately similar to ( 243) AT1G61140 | Symbols: EDA16 | EDA16 (embryo sac development arrest 16); ATP binding / DNA binding / helicase/ nucleic acid binding / protein binding / zinc ion binding | chr1:22535038-22539756 REVERSEvery weakly similar to (80.5) ISW2_ORYSA Probable chromatin remodelling complex ATPase chain (EC 3.6.1.-) (ISW2-like) (Sucrose nonfermenting protein 2 homolog) - Oryza sat…		1.14213	1.36784
27.3.44	RNA.regulation of transcription.Chromatin Remodeling Factors	grmzm2g049168_t01	Transcript	highly similar to ( 951) AT2G44980 | Symbols: | transcription regulatory protein SNF2, putative | chr2:18552343-18556669 REVERSEmoderately similar to ( 321) ISW2_ORYSA Probable chromatin remodelling complex ATPase chain (EC 3.6.1.-) (ISW2-like) (Sucrose nonfermenting protein 2 homolog) - Oryza sativa (Rice)nearly identical (1258) loc_os03g01200 12003.m05671 protein SNF2P, putative, expressed seq=…		0.86324
27.3.44	RNA.regulation of transcription.Chromatin Remodeling Factors	grmzm5g836167_t01	Transcript	very weakly similar to (91.3) AT5G44800 | Symbols: CHR4 | CHR4 (CHROMATIN REMODELING 4); ATP binding / DNA binding / chromatin binding / helicase/ nucleic acid binding / protein binding / zinc ion binding | chr5:18083659-18092162 REVERSEmoderately similar to ( 337) loc_os07g31450 12007.m07414 protein ATP binding protein, putative, expressed seq=cds; coord=2:201174497..201176318:1; parent_gene=GRM…		1.16284	1.1115
27.3.44	RNA.regulation of transcription.Chromatin Remodeling Factors	grmzm2g015190_t01	Transcript	highly similar to ( 577) AT5G22750 | Symbols: RAD5 | RAD5; ATP binding / ATP-dependent helicase/ DNA binding / helicase/ hydrolase, acting on acid anhydrides, in phosphorus-containing anhydrides / nucleic acid binding / protein binding / zinc ion binding | chr5:7565374-7570871 REVERSEhighly similar to ( 709) loc_os02g32570 12002.m33702 protein SWI/SNF-related matrix-associated actin-dependent reg…		1.03832
27.3.44	RNA.regulation of transcription.Chromatin Remodeling Factors	grmzm2g007922_t01	Transcript	nearly identical (1361) AT3G57300 | Symbols: INO80, ATINO80 | INO80 (INO80 ORTHOLOG); ATP binding / DNA binding / helicase/ nucleic acid binding | chr3:21199612-21207635 FORWARDmoderately similar to ( 251) ISW2_ORYSA Probable chromatin remodelling complex ATPase chain (EC 3.6.1.-) (ISW2-like) (Sucrose nonfermenting protein 2 homolog) - Oryza sativa (Rice)nearly identical (1831) loc_os03g22900 120…		1.37908
27.3.44	RNA.regulation of transcription.Chromatin Remodeling Factors	grmzm2g428242_t01	Transcript	nearly identical (1536) AT3G12810 | Symbols: PIE1, SRCAP, chr13 | PIE1 (PHOTOPERIOD-INDEPENDENT EARLY FLOWERING 1); ATP binding / DNA binding / helicase/ nucleic acid binding | chr3:4065636-4073992 FORWARDmoderately similar to ( 253) ISW2_ORYSA Probable chromatin remodelling complex ATPase chain (EC 3.6.1.-) (ISW2-like) (Sucrose nonfermenting protein 2 homolog) - Oryza sativa (Rice)nearly identic…		0.606483
27.3.44	RNA.regulation of transcription.Chromatin Remodeling Factors	ac233967.1_fgt001	Transcript	weakly similar to ( 118) AT4G26810 | Symbols: | SWIB complex BAF60b domain-containing protein | chr4:13492247-13492649 REVERSEweakly similar to ( 160) loc_os09g04720 12009.m03841 protein SWIb domain-containing protein, putative, expressed seq=cds; coord=2:54591993..54593558:-1; parent_gene=AC233967.1_FG001		1.78673	1.73339
27.3.44	RNA.regulation of transcription.Chromatin Remodeling Factors	grmzm2g141258_t01	Transcript	highly similar to ( 771) AT2G13370 | Symbols: CHR5 | CHR5 (chromatin remodeling 5); ATP binding / DNA binding / chromatin binding / helicase/ nucleic acid binding | chr2:5544601-5555543 REVERSEmoderately similar to ( 247) ISW2_ORYSA Probable chromatin remodelling complex ATPase chain (EC 3.6.1.-) (ISW2-like) (Sucrose nonfermenting protein 2 homolog) - Oryza sativa (Rice)nearly identical (1256) lo…		1.03421
27.3.44	RNA.regulation of transcription.Chromatin Remodeling Factors	grmzm2g381386_t01	Transcript	moderately similar to ( 427) AT2G40770 | Symbols: | ATP binding / DNA binding / helicase/ nucleic acid binding / protein binding / zinc ion binding | chr2:17013535-17021315 REVERSEmoderately similar to ( 271) loc_os07g48270 12007.m09041 protein ATP-dependent helicase C582.10c in chromosome II, putative, expressed seq=cds; coord=7:173225215..173228778:-1; parent_gene=GRMZM2G381386		1.08138	1.04418
27.3.44	RNA.regulation of transcription.Chromatin Remodeling Factors	grmzm2g047038_t01	Transcript	moderately similar to ( 463) AT4G34430 | Symbols: CHB3, ATSWI3D | CHB3; DNA binding / transcription factor/ zinc ion binding | chr4:16461069-16464993 FORWARDnearly identical (1013) loc_os03g51220 12003.m10103 protein SWI/SNF-related matrix-associated actin-dependent regulator of chromatin subfamily C member, putative, expressed seq=cds; coord=1:270124591..270135580:1; parent_gene=GRMZM2G047038		1.16104
27.3.44	RNA.regulation of transcription.Chromatin Remodeling Factors	grmzm2g148198_t01	Transcript	seq=cds; coord=2:54478976..54481403:-1; parent_gene=GRMZM2G148198			1.38288
27.3.44	RNA.regulation of transcription.Chromatin Remodeling Factors	grmzm2g015277_t01	Transcript	weakly similar to ( 116) AT5G18620 | Symbols: CHR17 | CHR17 (CHROMATIN REMODELING FACTOR17); ATP binding / DNA binding / DNA-dependent ATPase/ helicase/ hydrolase, acting on acid anhydrides, in phosphorus-containing anhydrides / nucleic acid binding / nucleosome binding | chr5:6196190-6202058 REVERSEweakly similar to ( 137) ISW2_ORYSA Probable chromatin remodelling complex ATPase chain (EC 3.6.1.…			-0.897276
27.3.44	RNA.regulation of transcription.Chromatin Remodeling Factors	grmzm2g097726_t01	Transcript	moderately similar to ( 204) AT4G22140 | Symbols: | DNA binding / protein binding / zinc ion binding | chr4:11728093-11730230 REVERSEmoderately similar to ( 281) loc_os07g08880 12007.m079807 protein SHL1, putative, expressed seq=cds; coord=7:13348616..13356457:1; parent_gene=GRMZM2G097726			0.682151
27.3.44	RNA.regulation of transcription.Chromatin Remodeling Factors	grmzm2g121510_t01	Transcript	moderately similar to ( 293) AT3G17590 | Symbols: BSH, CHE1 | BSH (BUSHY GROWTH); chromatin binding / protein binding | chr3:6017313-6019591 REVERSEmoderately similar to ( 422) loc_os02g49190 12002.m09953 protein SWI/SNF-related, matrix-associated, actin-dependent regulator of chromatin subfamily B member 1, putative, expressed seq=cds; coord=8:129290690..129293724:1; parent_gene=GRMZM2G121510			1.05812
27.3.44	RNA.regulation of transcription.Chromatin Remodeling Factors	grmzm2g524937_t01	Transcript	very weakly similar to (95.1) AT3G03590 | Symbols: | SWIB complex BAF60b domain-containing protein | chr3:865341-866669 REVERSEweakly similar to ( 125) loc_os02g03730 12002.m05722 protein SWIb domain-containing protein, putative, expressed seq=cds; coord=5:74408556..74411160:-1; parent_gene=GRMZM2G524937			1.38948
27.3.44	RNA.regulation of transcription.Chromatin Remodeling Factors	grmzm2g167668_t01	Transcript	weakly similar to ( 152) AT3G54460 | Symbols: | SNF2 domain-containing protein / helicase domain-containing protein / F-box family protein | chr3:20162050-20167186 REVERSEmoderately similar to ( 217) loc_os01g72310 12001.m13266 protein CW-type Zinc Finger family protein, expressed seq=cds; coord=3:148555847..148557050:-1; parent_gene=GRMZM2G167668			1.09086
27.3.44	RNA.regulation of transcription.Chromatin Remodeling Factors	grmzm2g163849_t01	Transcript	nearly identical (1835) AT2G46020 | Symbols: CHR2, ATBRM, BRM, CHA2 | transcription regulatory protein SNF2, putative | chr2:18923304-18931769 FORWARDmoderately similar to ( 352) ISW2_ORYSA Probable chromatin remodelling complex ATPase chain (EC 3.6.1.-) (ISW2-like) (Sucrose nonfermenting protein 2 homolog) - Oryza sativa (Rice)nearly identical (2727) loc_os02g02290 12002.m05579 protein SNF2 fami…			-0.594368
27.3.44	RNA.regulation of transcription.Chromatin Remodeling Factors	grmzm5g847505_t01	Transcript	moderately similar to ( 440) AT5G01710 | Symbols: | LOCATED IN: endomembrane system; EXPRESSED IN: sperm cell, male gametophyte, pollen tube; EXPRESSED DURING: L mature pollen stage, M germinated pollen stage; CONTAINS InterPro DOMAIN/s: Methyltransferase FkbM (InterPro:IPR006342); BEST Arabidopsis thaliana protein match is: methyltransferase (TAIR:AT4G24805.1); Has 224 Blast hits to 223 proteins…			1.20539
27.3.44	RNA.regulation of transcription.Chromatin Remodeling Factors	grmzm2g049766_t01	Transcript	weakly similar to ( 175) loc_os10g31970 12010.m06046 protein ATP binding protein, putative, expressed seq=cds; coord=1:235135689..235137414:-1; parent_gene=GRMZM2G049766			0.965346
27.3.44	RNA.regulation of transcription.Chromatin Remodeling Factors	grmzm2g046286_t01	Transcript	seq=cds; coord=6:135637743..135641863:-1; parent_gene=GRMZM2G046286			1.23656
GeBP-like
BinCode	BinName	id	type	description	ra1	ra2	ra3
27.3.49	RNA.regulation of transcription.GeBP like	grmzm2g030458_t01	Transcript	weakly similar to ( 112) AT3G04930 | Symbols: | transcription regulator | chr3:1363029-1364399 FORWARDmoderately similar to ( 325) loc_os03g25430 12003.m07890 protein expressed protein seq=cds; coord=9:127352979..127354539:1; parent_gene=GRMZM2G030458	-0.682199
27.3.49	RNA.regulation of transcription.GeBP like	grmzm2g026417_t01	Transcript	weakly similar to ( 111) AT3G04930 | Symbols: | transcription regulator | chr3:1363029-1364399 FORWARDmoderately similar to ( 332) loc_os03g25430 12003.m07890 protein expressed protein seq=cds; coord=1:64015285..64016906:-1; parent_gene=GRMZM2G026417	-0.947151
27.3.49	RNA.regulation of transcription.GeBP like	ac210013.4_fgt012	Transcript	moderately similar to ( 230) AT5G14280 | Symbols: | DNA-binding storekeeper protein-related | chr5:4609123-4611444 FORWARDmoderately similar to ( 371) loc_os05g23700 12005.m06664 protein transcription regulator, putative, expressed seq=cds; coord=5:3400221..3400991:-1; parent_gene=AC210013.4_FG012	-0.766728
27.3.49	RNA.regulation of transcription.GeBP like	grmzm2g041818_t01	Transcript	moderately similar to ( 320) loc_os03g50110 12003.m10006 protein expressed protein seq=cds; coord=1:266991584..266993120:-1; parent_gene=GRMZM2G041818	-0.742934
27.3.49	RNA.regulation of transcription.GeBP like	grmzm2g423292_t01	Transcript	moderately similar to ( 313) loc_os08g36450 12008.m07634 protein expressed protein seq=cds; coord=4:55755200..55757308:1; parent_gene=GRMZM2G423292	-0.716063
27.3.49	RNA.regulation of transcription.GeBP like	grmzm2g036966_t01	Transcript	moderately similar to ( 214) loc_os09g01140 12009.m60283 protein expressed protein seq=cds; coord=6:18918309..18924726:-1; parent_gene=GRMZM2G036966		1.12861	1.11816
27.3.49	RNA.regulation of transcription.GeBP like	grmzm2g392516_t01	Transcript	moderately similar to ( 228) loc_os09g01140 12009.m60283 protein expressed protein seq=cds; coord=6:19962512..19966575:-1; parent_gene=GRMZM2G392516		1.06965
27.3.49	RNA.regulation of transcription.GeBP like	grmzm2g092409_t01	Transcript	moderately similar to ( 355) loc_os09g27850 12009.m05936 protein expressed protein seq=cds; coord=7:124403339..124405205:1; parent_gene=GRMZM2G092409			0.764991
JUMONJI
BinCode	BinName	id	type	description	ra1	ra2	ra3
27.3.57	RNA.regulation of transcription.JUMONJI family	grmzm2g339379_t01	Transcript	highly similar to ( 590) AT3G48430 | Symbols: REF6 | REF6 (RELATIVE OF EARLY FLOWERING 6); nucleic acid binding / transcription factor/ zinc ion binding | chr3:17935609-17940456 FORWARDhighly similar to ( 986) loc_os01g67970 12001.m12901 protein jmjC domain containing protein, expressed seq=cds; coord=8:163447221..163451966:1; parent_gene=GRMZM2G339379	0.858673	1.09961
27.3.57	RNA.regulation of transcription.JUMONJI family	ac149475.2_fgt005	Transcript	moderately similar to ( 471) AT5G04240 | Symbols: ELF6 | ELF6 (EARLY FLOWERING 6); transcription factor | chr5:1169544-1174638 FORWARDhighly similar to ( 608) loc_os03g05690 12003.m34708 protein zinc finger, C2H2 type family protein, expressed seq=cds; coord=9:152524931..152535598:1; parent_gene=AC149475.2_FG005		1.05933
27.3.57	RNA.regulation of transcription.JUMONJI family	grmzm2g060919_t01	Transcript	highly similar to ( 625) AT5G46910 | Symbols: | transcription factor jumonji (jmj) family protein | chr5:19047780-19050880 FORWARDhighly similar to ( 706) loc_os10g42690 12010.m07021 protein jmjC domain containing protein, expressed seq=cds; coord=5:199221816..199229761:1; parent_gene=GRMZM2G060919		1.08205	0.89324
27.3.57	RNA.regulation of transcription.JUMONJI family	grmzm2g156910_t01	Transcript	highly similar to ( 805) AT1G08620 | Symbols: | transcription factor | chr1:2737554-2743370 FORWARDnearly identical (1567) loc_os05g10770 12005.m05547 protein jmjC domain containing protein, expressed seq=cds; coord=6:116474452..116480643:-1; parent_gene=GRMZM2G156910		1.00026
27.3.57	RNA.regulation of transcription.JUMONJI family	grmzm2g466292_t01	Transcript	weakly similar to ( 174) AT1G63490 | Symbols: | transcription factor jumonji (jmjC) domain-containing protein | chr1:23544938-23551946 REVERSEweakly similar to ( 155) loc_os05g10770 12005.m05547 protein jmjC domain containing protein, expressed seq=cds; coord=5:65425225..65434544:1; parent_gene=GRMZM2G466292		1.05861
27.3.57	RNA.regulation of transcription.JUMONJI family	grmzm2g057466_t01	Transcript	highly similar to ( 586) AT5G46910 | Symbols: | transcription factor jumonji (jmj) family protein | chr5:19047780-19050880 FORWARDhighly similar to ( 902) loc_os10g42690 12010.m07021 protein jmjC domain containing protein, expressed seq=cds; coord=1:103615815..103621968:1; parent_gene=GRMZM2G057466		1.03573
27.3.57	RNA.regulation of transcription.JUMONJI family	grmzm2g329159_t01	Transcript	weakly similar to ( 149) AT3G48430 | Symbols: REF6 | REF6 (RELATIVE OF EARLY FLOWERING 6); nucleic acid binding / transcription factor/ zinc ion binding | chr3:17935609-17940456 FORWARDmoderately similar to ( 460) loc_os03g05480 12003.m06071 protein zinc finger, C2H2 type family protein, expressed seq=cds; coord=1:10693415..10696796:-1; parent_gene=GRMZM2G329159			0.81754
27.3.57	RNA.regulation of transcription.JUMONJI family	grmzm2g079468_t01	Transcript	moderately similar to ( 469) AT5G19840 | Symbols: | transcription factor jumonji (jmjC) domain-containing protein | chr5:6705372-6709382 FORWARDhighly similar to ( 671) loc_os01g56640 12001.m11821 protein expressed protein seq=cds; coord=8:172690974..172697752:-1; parent_gene=GRMZM2G079468			0.931314
DNA methyltransferase
BinCode	BinName	id	type	description	ra1	ra2	ra3
27.3.46	RNA.regulation of transcription.DNA methyltransferases	grmzm2g025592_t01	Transcript	highly similar to ( 749) AT1G69770 | Symbols: CMT3 | CMT3 (chromomethylase 3); DNA (cytosine-5-)-methyltransferase | chr1:26248496-26253519 REVERSEnearly identical (1647) CMT1_MAIZE DNA (cytosine-5)-methyltransferase 1 (EC 2.1.1.37) (Chromomethylase 1) (Zea methyltransferase2) (Zmet2) (DNA cytosine methyltransferase MET2a) - Zea mays (Maize)nearly identical (1062) loc_os03g12570 12003.m06707 prot…		0.840666
27.3.46	RNA.regulation of transcription.DNA methyltransferases	grmzm2g065599_t01	Transcript	moderately similar to ( 269) AT3G17310 | Symbols: | methyltransferase family protein | chr3:5909294-5912838 REVERSEhighly similar to ( 628) loc_os05g04330 12005.m64178 protein DNA methyltransferase DMT106, putative, expressed seq=cds; coord=8:129957981..129960165:-1; parent_gene=GRMZM2G065599		1.06704	1.07298
27.3.46	RNA.regulation of transcription.DNA methyltransferases	grmzm2g157589_t01	Transcript	moderately similar to ( 462) AT5G25480 | Symbols: DNMT2 | DNMT2 (DNA METHYLTRANSFERASE-2); DNA binding | chr5:8870069-8872199 REVERSEmoderately similar to ( 386) loc_os01g42630 12001.m10527 protein expressed protein seq=cds; coord=8:142667782..142672558:-1; parent_gene=GRMZM2G157589			0.669402
SET-domain
BinCode	BinName	id	type	description	ra1	ra2	ra3
27.3.69	RNA.regulation of transcription.SET-domain transcriptional regulator family	ac233961.1_fgt001	Transcript	highly similar to ( 560) AT1G73100 | Symbols: SUVH3, SDG19 | SUVH3 (SU(VAR)3-9 HOMOLOG 3); histone methyltransferase | chr1:27491970-27493979 FORWARDnearly identical (1170) loc_os11g38900 12011.m07738 protein histone-lysine N-methyltransferase, H3 lysine-9 specific SUVH1, putative, expressed seq=cds; coord=7:20244021..20246591:1; parent_gene=AC233961.1_FG001	0.632902
27.3.69	RNA.regulation of transcription.SET-domain transcriptional regulator family	grmzm2g409224_t01	Transcript	weakly similar to ( 166) AT1G05830 | Symbols: ATX2 | ATX2 (ARABIDOPSIS TRITHORAX-LIKE PROTEIN 2); DNA binding / histone methyltransferase(H3-K4 specific) | chr1:1754452-1761225 FORWARDvery weakly similar to (82.8) EZ3_MAIZE Polycomb protein EZ3 (Enhancer of zeste protein 3) - Zea mays (Maize)highly similar to ( 937) loc_os09g38440 12009.m06785 protein SET domain containing protein, expressed seq=…	0.771775	0.830209	0.67796
27.3.69	RNA.regulation of transcription.SET-domain transcriptional regulator family	grmzm2g117458_t01	Transcript	highly similar to ( 552) AT5G04940 | Symbols: SUVH1 | SUVH1 (SU(VAR)3-9 HOMOLOG 1); histone methyltransferase | chr5:1454616-1456628 REVERSEnearly identical (1124) loc_os05g41172 12005.m083768 protein histone-lysine N-methyltransferase, H3 lysine-9 specific SUVH1, putative, expressed seq=cds; coord=6:155462838..155481947:-1; parent_gene=GRMZM2G117458	0.544093
27.3.69	RNA.regulation of transcription.SET-domain transcriptional regulator family	grmzm2g158194_t01	Transcript	moderately similar to ( 252) AT3G14740 | Symbols: | PHD finger family protein | chr3:4952185-4953306 REVERSEmoderately similar to ( 476) loc_os01g08820 12001.m07507 protein PHD-finger family protein, expressed seq=cds; coord=3:9042243..9044511:1; parent_gene=GRMZM2G158194	-0.73695
27.3.69	RNA.regulation of transcription.SET-domain transcriptional regulator family	grmzm2g013794_t01	Transcript	highly similar to ( 959) AT1G05830 | Symbols: ATX2 | ATX2 (ARABIDOPSIS TRITHORAX-LIKE PROTEIN 2); DNA binding / histone methyltransferase(H3-K4 specific) | chr1:1754452-1761225 FORWARDvery weakly similar to (89.0) EZ1_MAIZE Polycomb protein EZ1 (Enhancer of zeste protein 1) - Zea mays (Maize)nearly identical (1469) loc_os09g04890 12009.m21967 protein histone-lysine N-methyltransferase, H3 lysine-…	0.422974	1.02214	0.527902
27.3.69	RNA.regulation of transcription.SET-domain transcriptional regulator family	grmzm2g105869_t01	Transcript	weakly similar to ( 181) AT3G03750 | Symbols: SUVR3, SDG20 | SET domain-containing protein | chr3:939976-941511 FORWARD seq=cds; coord=2:199386714..199389560:-1; parent_gene=GRMZM2G105869	-0.931297
27.3.69	RNA.regulation of transcription.SET-domain transcriptional regulator family	grmzm2g305124_t01	Transcript	moderately similar to ( 394) AT5G24330 | Symbols: ATXR6, SDG34 | ATXR6; DNA binding / protein binding | chr5:8295245-8296997 REVERSEmoderately similar to ( 494) loc_os02g03030 12002.m05653 protein histone-lysine N-methyltransferase ATXR6, putative, expressed seq=cds; coord=5:71843738..71845004:1; parent_gene=GRMZM2G305124	-0.675104
27.3.69	RNA.regulation of transcription.SET-domain transcriptional regulator family	grmzm2g357972_t01	Transcript	moderately similar to ( 308) AT3G04380 | Symbols: SUVR4, SDG31 | SUVR4; histone-lysine N-methyltransferase | chr3:1161602-1164539 FORWARDmoderately similar to ( 365) loc_os02g40770 12002.m100281 protein pre-SET motif family protein, expressed seq=cds; coord=2:26003195..26007479:1; parent_gene=GRMZM2G357972		0.851515
27.3.69	RNA.regulation of transcription.SET-domain transcriptional regulator family	grmzm5g812144_t01	Transcript	moderately similar to ( 414) AT4G15180 | Symbols: SDG2, ATXR3 | SDG2 (SET DOMAIN-CONTAINING PROTEIN 2) | chr4:8651999-8662178 FORWARDhighly similar to ( 577) loc_os08g08210 12008.m04956 protein histone-lysine N-methyltransferase ATXR3, putative, expressed seq=cds; coord=10:57296442..57298962:1; parent_gene=GRMZM5G812144		1.53326	1.34217
27.3.69	RNA.regulation of transcription.SET-domain transcriptional regulator family	grmzm2g336909_t01	Transcript	highly similar to ( 625) AT5G13960 | Symbols: SUVH4, KYP, SDG33 | SUVH4 (SU(VAR)3-9 HOMOLOG 4); double-stranded methylated DNA binding / histone methyltransferase(H3-K9 specific) / methyl-CpG binding / methyl-CpNpG binding / methyl-CpNpN binding | chr5:4501688-4505979 FORWARDnearly identical (1038) loc_os01g70220 12001.m13070 protein histone-lysine N-methyltransferase, H3 lysine-9 specific SUVH6,…		0.821494	0.67394
27.3.69	RNA.regulation of transcription.SET-domain transcriptional regulator family	grmzm2g302195_t01	Transcript	moderately similar to ( 330) AT5G14260 | Symbols: | SET domain-containing protein | chr5:4601139-4603873 FORWARDmoderately similar to ( 416) loc_os12g13460 12012.m05319 protein SET domain containing protein, expressed seq=cds; coord=8:146470188..146472658:1; parent_gene=GRMZM2G302195		1.37088	1.38365
27.3.69	RNA.regulation of transcription.SET-domain transcriptional regulator family	grmzm2g170412_t01	Transcript	highly similar to ( 642) AT4G27910 | Symbols: ATX4, SDG16 | SDG16 (SET DOMAIN PROTEIN 16); protein binding / zinc ion binding | chr4:13894694-13900256 FORWARDnearly identical (1051) loc_os01g46700 12001.m10867 protein SET domain containing protein, expressed seq=cds; coord=8:147718464..147724348:1; parent_gene=GRMZM2G170412		1.0827
27.3.69	RNA.regulation of transcription.SET-domain transcriptional regulator family	grmzm2g067019_t01	Transcript	moderately similar to ( 228) AT4G30860 | Symbols: ASHR3, SDG4 | SDG4 (SET DOMAIN GROUP 4); histone methyltransferase | chr4:15024546-15027427 FORWARDmoderately similar to ( 225) loc_os02g39800 12002.m09066 protein histone methyltransferase Mes-4, putative seq=cds; coord=4:136070311..136101261:-1; parent_gene=GRMZM2G067019		0.952953	0.738944
27.3.69	RNA.regulation of transcription.SET-domain transcriptional regulator family	grmzm2g025924_t01	Transcript	highly similar to ( 586) AT2G33290 | Symbols: SUVH2, SDG3, ATSUVH2 | SUVH2 (SU(VAR)3-9 HOMOLOG 2); histone methyltransferase | chr2:14110078-14112033 FORWARDhighly similar to ( 959) loc_os07g25450 12007.m06822 protein histone-lysine N-methyltransferase, H3 lysine-9, H3 lysine-27, H4lysine-20 and cytosine specific SUVH2, putative, expressed seq=cds; coord=2:169539961..169542455:-1; parent_gene=GRM…		0.932801
27.3.69	RNA.regulation of transcription.SET-domain transcriptional regulator family	grmzm2g300955_t01	Transcript	moderately similar to ( 467) AT2G35160 | Symbols: SUVH5, SGD9 | SUVH5 (SU(VAR)3-9 HOMOLOG 5); histone methyltransferase | chr2:14823562-14825946 FORWARDhighly similar to ( 920) loc_os09g19830 12009.m05190 protein YDG/SRA domain containing protein, expressed seq=cds; coord=2:176724623..176730005:1; parent_gene=GRMZM2G300955		0.914951
27.3.69	RNA.regulation of transcription.SET-domain transcriptional regulator family	grmzm2g033694_t01	Transcript	moderately similar to ( 321) AT2G44150 | Symbols: ASHH3, SDG7 | ASHH3 (HISTONE-LYSINE N-METHYLTRANSFERASE ASHH3); histone-lysine N-methyltransferase | chr2:18258863-18261003 FORWARDmoderately similar to ( 439) loc_os09g13740 12009.m04635 protein histone-lysine N-methyltransferase, H3 lysine-36 and H4 lysine-20specific, putative, expressed seq=cds; coord=2:173776072..173793383:-1; parent_gene=GRMZ…			0.641452
SNF7
BinCode	BinName	id	type	description	ra1	ra2	ra3
27.3.71	RNA.regulation of transcription.SNF7	grmzm2g042552_t01	Transcript	weakly similar to ( 136) AT5G22950 | Symbols: VPS24.1 | VPS24.1 | chr5:7681380-7682720 FORWARDweakly similar to ( 174) loc_os03g01810 12003.m05725 protein charged multivesicular body protein 3, putative, expressed seq=cds; coord=1:2783894..2786103:1; parent_gene=GRMZM2G042552	-0.724054
27.3.71	RNA.regulation of transcription.SNF7	grmzm2g107757_t01	Transcript	moderately similar to ( 209) AT2G19830 | Symbols: SNF7.2, VPS32 | SNF7.2 | chr2:8558101-8559389 REVERSEmoderately similar to ( 241) loc_os09g09480 12009.m059945 protein charged multivesicular body protein 4b, putative, expressed seq=cds; coord=8:143676986..143682414:1; parent_gene=GRMZM2G107757			0.613172
27.3.71	RNA.regulation of transcription.SNF7	grmzm2g117935_t01	Transcript	moderately similar to ( 269) AT1G73030 | Symbols: VPS46.2 | VPS46.2 | chr1:27473938-27474848 FORWARDmoderately similar to ( 292) loc_os06g43590 12006.m091745 protein charged multivesicular body protein 1b, putative, expressed seq=cds; coord=9:94575435..94578265:-1; parent_gene=GRMZM2G117935			0.725143
27.3.71	RNA.regulation of transcription.SNF7	grmzm2g092468_t01	Transcript	moderately similar to ( 356) AT5G04850 | Symbols: VPS60.2 | VPS60.2 | chr5:1408246-1409806 REVERSEmoderately similar to ( 411) loc_os05g01250 12005.m04666 protein charged multivesicular body protein 5, putative, expressed seq=cds; coord=6:44413776..44418844:-1; parent_gene=GRMZM2G092468			0.787252
27.3.71	RNA.regulation of transcription.SNF7	grmzm2g085565_t01	Transcript	weakly similar to ( 171) loc_os07g30830 12007.m079683 protein retrotransposon protein, putative, unclassified, expressed seq=cds; coord=7:149852528..149854574:1; parent_gene=GRMZM2G085565			0.589372
27.3.71	RNA.regulation of transcription.SNF7	grmzm2g004996_t01	Transcript	weakly similar to ( 140) AT1G03950 | Symbols: VPS2.3 | VPS2.3 (VACUOLAR PROTEIN SORTING-ASSOCIATED PROTEIN 2.3) | chr1:1011388-1013212 REVERSEweakly similar to ( 166) loc_os10g33660 12010.m06194 protein charged multivesicular body protein 2b, putative, expressed seq=cds; coord=1:232178403..232181056:1; parent_gene=GRMZM2G004996			0.955093
Nucleosome assembly
BinCode	BinName	id	type	description	ra1	ra2	ra3
27.3.62	RNA.regulation of transcription.Nucleosome/chromatin assembly factor group	grmzm2g145968_t01	Transcript	weakly similar to ( 122) loc_os04g47690 12004.m35419 protein HMG1/2-like protein, putative, expressed seq=cds; coord=2:17348097..17355999:-1; parent_gene=GRMZM2G145968	-0.688985
27.3.62	RNA.regulation of transcription.Nucleosome/chromatin assembly factor group	grmzm2g156785_t01	Transcript	very weakly similar to (86.3) HMGL_VICFA HMG1/2-like protein - Vicia faba (Broad bean)weakly similar to ( 126) loc_os02g44930 12002.m09533 protein HMG1/2-like protein, putative, expressed seq=cds; coord=4:154624996..154627067:1; parent_gene=GRMZM2G156785	-0.54461
27.3.62	RNA.regulation of transcription.Nucleosome/chromatin assembly factor group	grmzm2g125648_t01	Transcript	weakly similar to ( 141) AT5G23420 | Symbols: HMGB6 | HMGB6; transcription factor | chr5:7888712-7890111 REVERSEvery weakly similar to (80.5) MNB1B_MAIZE DNA-binding protein MNB1B (HMG1-like protein) - Zea mays (Maize)weakly similar to ( 196) loc_os08g01100 12008.m04259 protein HMG1/2-like protein, putative, expressed seq=cds; coord=4:195378816..195380596:1; parent_gene=GRMZM2G125648			0.411506
27.3.62	RNA.regulation of transcription.Nucleosome/chromatin assembly factor group	grmzm2g066528_t01	Transcript	weakly similar to ( 125) AT1G20696 | Symbols: HMGB3, NFD3, NFD03 | HMGB3 (HIGH MOBILITY GROUP B 3); DNA binding / chromatin binding / structural constituent of chromatin / transcription factor | chr1:7179825-7181170 FORWARDweakly similar to ( 139) HMGL_IPONI HMG1/2-like protein - Ipomoea nil (Japanese morning glory) (Pharbitis nil)weakly similar to ( 190) loc_os09g37910 12009.m22188 protein HMG1/…			0.763872
27.3.62	RNA.regulation of transcription.Nucleosome/chromatin assembly factor group	grmzm2g337749_t01	Transcript	weakly similar to ( 190) AT5G08630 | Symbols: | DDT domain-containing protein | chr5:2798575-2802138 REVERSEmoderately similar to ( 369) loc_os02g35100 12002.m100234 protein DDT domain containing protein, expressed seq=cds; coord=5:173390747..173396034:-1; parent_gene=GRMZM2G337749			0.848267
histone_ATase
BinCode	BinName	id	type	description	ra1	ra2	ra3
27.3.54	RNA.regulation of transcription.Histone acetyltransferases	grmzm2g131618_t01	Transcript	weakly similar to ( 179) AT1G03650 | Symbols: | GCN5-related N-acetyltransferase (GNAT) family protein | chr1:910249-911103 REVERSEmoderately similar to ( 225) loc_os10g35680 12010.m06388 protein acetyltransferase, putative, expressed seq=cds; coord=1:226620315..226621374:1; parent_gene=GRMZM2G131618	-0.996485
27.3.54	RNA.regulation of transcription.Histone acetyltransferases	grmzm2g135849_t01	Transcript	weakly similar to ( 187) AT1G03650 | Symbols: | GCN5-related N-acetyltransferase (GNAT) family protein | chr1:910249-911103 REVERSEmoderately similar to ( 231) loc_os10g35680 12010.m06388 protein acetyltransferase, putative, expressed seq=cds; coord=1:226835092..226836607:1; parent_gene=GRMZM2G135849	-0.622018
27.3.54	RNA.regulation of transcription.Histone acetyltransferases	grmzm2g448927_t01	Transcript	weakly similar to ( 115) AT5G56740 | Symbols: HAG2, HAC7, HAG02, HAC07 | HAG2 (HISTONE ACETYLTRANSFERASE OF THE GNAT FAMILY 2); H4 histone acetyltransferase/ histone acetyltransferase | chr5:22953009-22955577 REVERSEmoderately similar to ( 243) HAT1_MAIZE Histone acetyltransferase type B catalytic subunit (EC 2.3.1.48) (Histone acetyltransferase HAT B) (Histone acetyltransferase HAT-B-p50) - Zea …	-0.514823
27.3.54	RNA.regulation of transcription.Histone acetyltransferases	grmzm2g069886_t01	Transcript	highly similar to ( 720) AT1G79000 | Symbols: HAC1, PCAT2, ATHPCAT2 | HAC1 (HISTONE ACETYLTRANSFERASE OF THE CBP FAMILY 1); H3/H4 histone acetyltransferase/ histone acetyltransferase/ transcription cofactor | chr1:29716933-29723984 REVERSEnearly identical (1533) loc_os01g14370 12001.m08042 protein histone acetyltransferase/ protein binding protein, putative, expressed seq=cds; coord=3:114434585..…		0.995714
27.3.54	RNA.regulation of transcription.Histone acetyltransferases	grmzm2g484880_t01	Transcript	moderately similar to ( 316) AT4G37280 | Symbols: | MRG family protein | chr4:17546748-17549362 REVERSEmoderately similar to ( 431) loc_os11g34300 12011.m28883 protein chromatin modification-related protein EAF3, putative, expressed seq=cds; coord=5:129184296..129199752:1; parent_gene=GRMZM2G484880		0.756116	0.802604
27.3.54	RNA.regulation of transcription.Histone acetyltransferases	grmzm2g400092_t01	Transcript	weakly similar to ( 150) AT5G56740 | Symbols: HAG2, HAC7, HAG02, HAC07 | HAG2 (HISTONE ACETYLTRANSFERASE OF THE GNAT FAMILY 2); H4 histone acetyltransferase/ histone acetyltransferase | chr5:22953009-22955577 REVERSEmoderately similar to ( 345) HAT1_MAIZE Histone acetyltransferase type B catalytic subunit (EC 2.3.1.48) (Histone acetyltransferase HAT B) (Histone acetyltransferase HAT-B-p50) - Zea …		1.55258	1.84115
27.3.54	RNA.regulation of transcription.Histone acetyltransferases	grmzm5g851405_t01	Transcript	moderately similar to ( 289) AT5G56740 | Symbols: HAG2, HAC7, HAG02, HAC07 | HAG2 (HISTONE ACETYLTRANSFERASE OF THE GNAT FAMILY 2); H4 histone acetyltransferase/ histone acetyltransferase | chr5:22953009-22955577 REVERSEhighly similar to ( 726) HAT1_MAIZE Histone acetyltransferase type B catalytic subunit (EC 2.3.1.48) (Histone acetyltransferase HAT B) (Histone acetyltransferase HAT-B-p50) - Zea …		1.03268	0.911233
27.3.54	RNA.regulation of transcription.Histone acetyltransferases	grmzm2g046021_t01	Transcript	highly similar to ( 549) AT3G54610 | Symbols: HAT1, GCN5, HAG1, HAC3, HAG01, BGT | GCN5; DNA binding / H3 histone acetyltransferase/ histone acetyltransferase | chr3:20213593-20217375 FORWARDhighly similar to ( 720) loc_os10g28040 12010.m05687 protein general control of amino acid synthesis protein 5-like 2, putative, expressed seq=cds; coord=5:33819024..33824962:1; parent_gene=GRMZM2G046021		0.848415
27.3.54	RNA.regulation of transcription.Histone acetyltransferases	grmzm2g042231_t01	Transcript	moderately similar to ( 396) AT1G32750 | Symbols: HAF01, HAF1, HAC13, GTD1, TAF1 | HAF01; DNA binding / histone acetyltransferase | chr1:11846385-11856261 REVERSEhighly similar to ( 902) loc_os06g43790 12006.m08909 protein HAF01, putative, expressed seq=cds; coord=9:93378612..93382170:1; parent_gene=GRMZM2G042231			0.865815
histone_Daase
BinCode	BinName	id	type	description	ra1	ra2	ra3
27.3.55	RNA.regulation of transcription.HDA	grmzm2g457889_t01	Transcript	highly similar to ( 719) AT5G61060 | Symbols: HDA05, HDA5, ATHDA5 | HDA05 (HISTONE DEACETYLASE 5); histone deacetylase | chr5:24567137-24570917 REVERSEweakly similar to ( 111) HDAC_MAIZE Probable histone deacetylase (RPD3 homolog) - Zea mays (Maize)nearly identical (1056) loc_os07g41090 12007.m29249 protein histone deacetylase 6, putative, expressed seq=cds; coord=2:209634733..209646238:1; parent…		1.22296	0.943069
27.3.55	RNA.regulation of transcription.HDA	grmzm2g119703_t01	Transcript	highly similar to ( 709) AT3G44680 | Symbols: HDA9, HDA09 | HDA9 (HISTONE DEACETYLASE 9); histone deacetylase | chr3:16226769-16229752 REVERSEmoderately similar to ( 487) HDAC_MAIZE Probable histone deacetylase (RPD3 homolog) - Zea mays (Maize)highly similar to ( 656) loc_os04g33480 12004.m101828 protein histone deacetylase 1, putative, expressed seq=cds; coord=2:58461182..58472168:-1; parent_gen…		1.3486	1.29121
27.3.55	RNA.regulation of transcription.HDA	grmzm2g463622_t01	Transcript	weakly similar to ( 108) HD2A_MAIZE Histone deacetylase 2a (HD2a) (Zm-HD2a) (Nucleolar histone deacetylase HD2-p39) - Zea mays (Maize)very weakly similar to (80.5) loc_os05g51830 12005.m09245 protein histone deacetylase 2b, putative, expressed seq=cds; coord=8:6236059..6242235:-1; parent_gene=GRMZM2G463622		1.83806	1.62775
27.3.55	RNA.regulation of transcription.HDA	grmzm2g057044_t01	Transcript	very weakly similar to (91.7) AT3G44750 | Symbols: HD2A, ATHD2A, HDA3, HDT1 | HDA3 (HISTONE DEACETYLASE 3); histone deacetylase/ nucleic acid binding / zinc ion binding | chr3:16298045-16299585 FORWARDweakly similar to ( 125) HD2C_MAIZE Histone deacetylase 2c (HD2c) (Zm-HD2c) - Zea mays (Maize)weakly similar to ( 123) loc_os05g51830 12005.m09245 protein histone deacetylase 2b, putative, expressed…		1.14789	1.11102
27.3.55	RNA.regulation of transcription.HDA	grmzm2g136067_t01	Transcript	highly similar to ( 670) AT5G63110 | Symbols: HDA6, AXE1, ATHDA6, RTS1, RPD3B, SIL1 | HDA6 (HISTONE DEACETYLASE 6); histone deacetylase | chr5:25315834-25318227 REVERSEhighly similar to ( 568) HDAC_MAIZE Probable histone deacetylase (RPD3 homolog) - Zea mays (Maize)highly similar to ( 884) loc_os08g25570 12008.m06573 protein histone deacetylase, putative, expressed seq=cds; coord=4:65957087..6596…			0.917278
27.3.55	RNA.regulation of transcription.HDA	grmzm5g898314_t01	Transcript	weakly similar to ( 102) AT3G44750 | Symbols: HD2A, ATHD2A, HDA3, HDT1 | HDA3 (HISTONE DEACETYLASE 3); histone deacetylase/ nucleic acid binding / zinc ion binding | chr3:16298045-16299585 FORWARDweakly similar to ( 134) HD2C_MAIZE Histone deacetylase 2c (HD2c) (Zm-HD2c) - Zea mays (Maize)weakly similar to ( 134) loc_os05g51830 12005.m09245 protein histone deacetylase 2b, putative, expressed seq=…			0.958896
27.3.55	RNA.regulation of transcription.HDA	grmzm2g100146_t01	Transcript	very weakly similar to (99.0) AT3G44750 | Symbols: HD2A, ATHD2A, HDA3, HDT1 | HDA3 (HISTONE DEACETYLASE 3); histone deacetylase/ nucleic acid binding / zinc ion binding | chr3:16298045-16299585 FORWARDmoderately similar to ( 245) HD2B_MAIZE Histone deacetylase 2b (HD2b) (Zm-HD2b) - Zea mays (Maize)weakly similar to ( 164) loc_os05g51830 12005.m09245 protein histone deacetylase 2b, putative, expre…			0.655696
27.3.55	RNA.regulation of transcription.HDA	grmzm2g159032_t01	Transcript	very weakly similar to (97.4) AT3G44750 | Symbols: HD2A, ATHD2A, HDA3, HDT1 | HDA3 (HISTONE DEACETYLASE 3); histone deacetylase/ nucleic acid binding / zinc ion binding | chr3:16298045-16299585 FORWARDmoderately similar to ( 374) HD2C_MAIZE Histone deacetylase 2c (HD2c) (Zm-HD2c) - Zea mays (Maize)weakly similar to ( 157) loc_os05g51830 12005.m09245 protein histone deacetylase 2b, putative, expre…			0.52315
PHD-finger
BinCode	BinName	id	type	description	ra1	ra2	ra3
27.3.63	RNA.regulation of transcription.PHD finger transcription factor	ac208436.3_fgt007	Transcript	weakly similar to ( 156) AT5G58610 | Symbols: | PHD finger transcription factor, putative | chr5:23686771-23691053 REVERSEweakly similar to ( 115) loc_os07g49290 12007.m09138 protein DNA binding protein, putative, expressed seq=cds; coord=1:45099020..45105645:1; parent_gene=AC208436.3_FG007		1.55842
27.3.63	RNA.regulation of transcription.PHD finger transcription factor	grmzm2g377887_t01	Transcript	moderately similar to ( 325) AT2G27980 | Symbols: | protein binding / zinc ion binding | chr2:11913950-11919741 REVERSEmoderately similar to ( 431) loc_os06g51450 12006.m09668 protein PHD zinc finger protein, putative, expressed seq=cds; coord=5:65948915..65954242:1; parent_gene=GRMZM2G377887		1.06629	0.981762
27.3.63	RNA.regulation of transcription.PHD finger transcription factor	grmzm2g412492_t01	Transcript	moderately similar to ( 425) AT1G05380 | Symbols: | DNA binding | chr1:1577231-1582190 FORWARDnearly identical (1061) loc_os07g07690 12007.m29081 protein DNA binding protein, putative, expressed seq=cds; coord=7:8826124..8831882:1; parent_gene=GRMZM2G412492		1.25906
27.3.63	RNA.regulation of transcription.PHD finger transcription factor	grmzm2g393471_t01	Transcript	highly similar to ( 591) AT2G16485 | Symbols: | DNA binding / nucleic acid binding / protein binding / zinc ion binding | chr2:7137269-7145222 REVERSEhighly similar to ( 945) loc_os10g36810 12010.m06486 protein plus-3 domain containing protein, expressed seq=cds; coord=9:154384109..154393963:-1; parent_gene=GRMZM2G393471		1.28698
27.3.63	RNA.regulation of transcription.PHD finger transcription factor	grmzm2g128176_t01	Transcript	highly similar to ( 607) AT5G12400 | Symbols: | PHD finger transcription factor, putative | chr5:4013813-4020909 FORWARDnearly identical (1647) loc_os07g46690 12007.m08886 protein PHD-finger family protein, expressed seq=cds; coord=7:171564760..171575198:-1; parent_gene=GRMZM2G128176		0.626828
27.3.63	RNA.regulation of transcription.PHD finger transcription factor	grmzm2g038050_t01	Transcript	moderately similar to ( 459) AT3G14980 | Symbols: | PHD finger transcription factor, putative | chr3:5039931-5044811 REVERSEhighly similar to ( 629) loc_os04g59510 12004.m10826 protein DNA binding protein, putative, expressed seq=cds; coord=10:149547787..149558325:-1; parent_gene=GRMZM2G038050		0.895205
27.3.63	RNA.regulation of transcription.PHD finger transcription factor	grmzm2g134214_t01	Transcript	moderately similar to ( 485) AT2G27980 | Symbols: | protein binding / zinc ion binding | chr2:11913950-11919741 REVERSEnearly identical (1095) loc_os06g01170 12006.m04857 protein protein binding protein, putative, expressed seq=cds; coord=6:54775354..54785293:1; parent_gene=GRMZM2G134214		0.956969
27.3.63	RNA.regulation of transcription.PHD finger transcription factor	grmzm2g012216_t01	Transcript	moderately similar to ( 225) AT2G37520 | Symbols: | PHD finger family protein | chr2:15745033-15749615 REVERSEhighly similar to ( 503) loc_os03g17050 12003.m07137 protein expressed protein seq=cds; coord=1:16199940..16210076:-1; parent_gene=GRMZM2G012216			1.19379
RNA-RNA binding
BinCode	BinName	id	type	description	ra1	ra2	ra3
27.4	RNA.RNA binding	grmzm2g051247_t01	Transcript	weakly similar to ( 161) AT1G76940 | Symbols: | RNA recognition motif (RRM)-containing protein | chr1:28902707-28904085 REVERSEmoderately similar to ( 345) loc_os06g03690 12006.m091584 protein nucleic acid binding protein, putative, expressed seq=cds; coord=9:25038179..25042320:-1; parent_gene=GRMZM2G051247	-0.70178
27.4	RNA.RNA binding	grmzm2g066394_t01	Transcript	weakly similar to ( 114) AT3G03920 | Symbols: | Gar1 RNA-binding region family protein | chr3:1009123-1010379 REVERSEweakly similar to ( 123) loc_os11g37080 12011.m07556 protein h/ACA ribonucleoprotein complex subunit 1-like protein 1, putative, expressed seq=cds; coord=2:226585530..226586233:1; parent_gene=GRMZM2G066394	-0.925383
27.4	RNA.RNA binding	grmzm5g841101_t01	Transcript	moderately similar to ( 262) AT1G60000 | Symbols: | 29 kDa ribonucleoprotein, chloroplast, putative / RNA-binding protein cp29, putative | chr1:22093704-22094540 REVERSEweakly similar to ( 153) ROC5_NICSY 33 kDa ribonucleoprotein, chloroplast precursor - Nicotiana sylvestris (Wood tobacco)moderately similar to ( 323) loc_os02g57010 12002.m10723 protein ribonucleoprotein, chloroplast, putative, ex…	-1.12743
27.4	RNA.RNA binding	grmzm2g005659_t01	Transcript	weakly similar to ( 120) loc_os03g63730 12003.m11241 protein RNA-binding protein 34, putative, expressed seq=cds; coord=2:47174194..47175131:1; parent_gene=GRMZM2G005659	-0.858365
27.4	RNA.RNA binding	grmzm5g832248_t01	Transcript	moderately similar to ( 325) AT5G09880 | Symbols: | RNA recognition motif (RRM)-containing protein | chr5:3081646-3085179 REVERSEmoderately similar to ( 377) loc_os03g05830 12003.m06105 protein splicing factor, putative, expressed seq=cds; coord=9:152744722..152753473:-1; parent_gene=GRMZM5G832248	-0.712146	-0.603486	-0.507446
27.4	RNA.RNA binding	grmzm2g179031_t01	Transcript	moderately similar to ( 241) AT3G26932 | Symbols: DRB3 | DRB3 (dsRNA-binding protein 3); RNA binding / double-stranded RNA binding | chr3:9930460-9931714 REVERSEmoderately similar to ( 380) loc_os09g33460 12009.m06394 protein double-stranded RNA binding motif family protein, expressed seq=cds; coord=2:192432192..192434451:1; parent_gene=GRMZM2G179031	-0.849999
27.4	RNA.RNA binding	grmzm2g107163_t01	Transcript	weakly similar to ( 159) AT5G55670 | Symbols: | RNA recognition motif (RRM)-containing protein | chr5:22544669-22546801 REVERSEmoderately similar to ( 216) loc_os08g38240 12008.m26723 protein cleavage and polyadenylation specificity factor 6, putative, expressed seq=cds; coord=1:182898704..182903336:-1; parent_gene=GRMZM2G107163	-0.687558
27.4	RNA.RNA binding	grmzm2g083813_t01	Transcript	moderately similar to ( 272) AT5G46840 | Symbols: | RNA recognition motif (RRM)-containing protein | chr5:19006062-19007609 FORWARDmoderately similar to ( 451) loc_os03g63730 12003.m11241 protein RNA-binding protein 34, putative, expressed seq=cds; coord=5:894435..898225:-1; parent_gene=GRMZM2G083813	-0.611724
27.4	RNA.RNA binding	grmzm2g125529_t01	Transcript	moderately similar to ( 256) AT3G04500 | Symbols: | RNA recognition motif (RRM)-containing protein | chr3:1212065-1213795 REVERSEmoderately similar to ( 351) loc_os02g40900 12002.m09175 protein mgc10433l protein, putative, expressed seq=cds; coord=4:142201866..142205470:-1; parent_gene=GRMZM2G125529	-0.986592
27.4	RNA.RNA binding	grmzm2g085113_t01	Transcript	moderately similar to ( 231) AT3G26120 | Symbols: TEL1 | TEL1 (TERMINAL EAR1-LIKE 1); RNA binding / nucleic acid binding / nucleotide binding | chr3:9546398-9549186 FORWARDhighly similar to ( 875) TE1_MAIZE Protein terminal ear1 - Zea mays (Maize)highly similar to ( 580) loc_os01g68000 12001.m12904 protein TERMINAL EAR1, putative, expressed seq=cds; coord=3:165174146..165178071:-1; parent_gene=GR…	-0.63046
27.4	RNA.RNA binding	grmzm2g029058_t01	Transcript	moderately similar to ( 267) AT3G14450 | Symbols: CID9 | CID9 (CTC-Interacting Domain 9); RNA binding / protein binding | chr3:4849788-4851601 FORWARDmoderately similar to ( 372) loc_os02g14760 12002.m33628 protein CID11, putative, expressed seq=cds; coord=4:227208348..227214898:1; parent_gene=GRMZM2G029058	-0.638014
27.4	RNA.RNA binding	grmzm2g048551_t01	Transcript	weakly similar to ( 199) AT3G10400 | Symbols: | RNA recognition motif (RRM)-containing protein | chr3:3232636-3233421 FORWARDmoderately similar to ( 234) loc_os09g37720 12009.m06719 protein RNA binding protein, putative, expressed seq=cds; coord=2:197455385..197456577:-1; parent_gene=GRMZM2G048551	-0.920412
27.4	RNA.RNA binding	grmzm2g016296_t01	Transcript	weakly similar to ( 192) AT5G64200 | Symbols: ATSC35, SC35 | ATSC35; RNA binding / nucleic acid binding / nucleotide binding | chr5:25681849-25683553 REVERSEmoderately similar to ( 220) loc_os08g37960 12008.m26517 protein splicing factor, arginine/serine-rich 2, putative, expressed seq=cds; coord=4:197062103..197070522:-1; parent_gene=GRMZM2G016296	-0.324385
27.4	RNA.RNA binding	grmzm2g053223_t01	Transcript	moderately similar to ( 213) AT3G10400 | Symbols: | RNA recognition motif (RRM)-containing protein | chr3:3232636-3233421 FORWARDmoderately similar to ( 254) loc_os09g37720 12009.m06719 protein RNA binding protein, putative, expressed seq=cds; coord=7:147093958..147094877:1; parent_gene=GRMZM2G053223	-1.23739
27.4	RNA.RNA binding	grmzm2g577405_t01	Transcript	weakly similar to ( 103) AT3G46020 | Symbols: | RNA-binding protein, putative | chr3:16912511-16913250 REVERSEvery weakly similar to (86.7) loc_os07g41120 12007.m08349 protein RNA recognition motif family protein seq=cds; coord=7:165018915..165028507:1; parent_gene=GRMZM2G577405	-1.6264
27.4	RNA.RNA binding	grmzm2g351027_t01	Transcript	weakly similar to ( 108) AT3G26120 | Symbols: TEL1 | TEL1 (TERMINAL EAR1-LIKE 1); RNA binding / nucleic acid binding / nucleotide binding | chr3:9546398-9549186 FORWARDweakly similar to ( 118) TE1_MAIZE Protein terminal ear1 - Zea mays (Maize)weakly similar to ( 134) loc_os02g06320 12002.m05980 protein TERMINAL EAR1, putative seq=cds; coord=4:237146718..237149935:-1; parent_gene=GRMZM2G351027	-0.94259		0.894949
27.4	RNA.RNA binding	grmzm2g077797_t01	Transcript	weakly similar to ( 147) AT2G37510 | Symbols: | RNA-binding protein, putative | chr2:15743112-15744504 REVERSEweakly similar to ( 195) loc_os03g17060 12003.m07138 protein RNA binding protein, putative, expressed seq=cds; coord=1:41850832..41852741:1; parent_gene=GRMZM2G077797	-0.666946
27.4	RNA.RNA binding	grmzm2g071589_t01	Transcript	moderately similar to ( 438) AT5G09880 | Symbols: | RNA recognition motif (RRM)-containing protein | chr5:3081646-3085179 REVERSEhighly similar to ( 524) loc_os03g05830 12003.m06105 protein splicing factor, putative, expressed seq=cds; coord=5:32658760..32668791:-1; parent_gene=GRMZM2G071589	-0.552538
27.4	RNA.RNA binding	grmzm2g076597_t01	Transcript	moderately similar to ( 322) AT5G09880 | Symbols: | RNA recognition motif (RRM)-containing protein | chr5:3081646-3085179 REVERSEmoderately similar to ( 416) loc_os10g30370 12010.m22002 protein RNA-binding region-containing protein 2, putative, expressed seq=cds; coord=1:237741444..237749566:1; parent_gene=GRMZM2G076597	-0.797831
27.4	RNA.RNA binding	grmzm2g131957_t01	Transcript	weakly similar to ( 157) AT5G55670 | Symbols: | RNA recognition motif (RRM)-containing protein | chr5:22544669-22546801 REVERSEmoderately similar to ( 205) loc_os08g38240 12008.m26723 protein cleavage and polyadenylation specificity factor 6, putative, expressed seq=cds; coord=4:197527208..197531726:-1; parent_gene=GRMZM2G131957	-0.641863
27.4	RNA.RNA binding	grmzm2g073700_t01	Transcript	weakly similar to ( 176) AT1G78260 | Symbols: | RNA recognition motif (RRM)-containing protein | chr1:29447317-29449246 FORWARDmoderately similar to ( 242) loc_os06g11730 12006.m05890 protein RNA-binding region-containing protein 1, putative, expressed seq=cds; coord=6:112003443..112007827:-1; parent_gene=GRMZM2G073700	-0.867208
27.4	RNA.RNA binding	grmzm2g080603_t01	Transcript	weakly similar to ( 138) AT2G21660 | Symbols: ATGRP7, CCR2 | CCR2 (COLD, CIRCADIAN RHYTHM, AND RNA BINDING 2); RNA binding / double-stranded DNA binding / single-stranded DNA binding | chr2:9265477-9266316 REVERSEweakly similar to ( 142) GRPA_MAIZE Glycine-rich RNA-binding, abscisic acid-inducible protein - Zea mays (Maize)weakly similar to ( 152) loc_os12g43600 12012.m26989 protein glycine-rich …	-1.4949	-0.756169	-0.555747
27.4	RNA.RNA binding	grmzm2g146111_t01	Transcript	very weakly similar to (86.7) AT1G09700 | Symbols: HYL1, DRB1 | HYL1 (HYPONASTIC LEAVES 1); double-stranded RNA binding / miRNA binding / protein binding | chr1:3137960-3140118 REVERSEweakly similar to ( 174) loc_os08g29530 12008.m26677 protein RBP2 protein, putative, expressed seq=cds; coord=1:219369608..219375936:1; parent_gene=GRMZM2G146111	0.500142		0.866114
27.4	RNA.RNA binding	grmzm2g120373_t01	Transcript	highly similar to ( 837) AT4G21670 | Symbols: CPL1, FRY2, ATCPL1 | CPL1 (C-TERMINAL DOMAIN PHOSPHATASE-LIKE 1); double-stranded RNA binding / nucleotide phosphatase | chr4:11511511-11516922 FORWARDnearly identical (1487) loc_os02g42600 12002.m09295 protein CPL1, putative, expressed seq=cds; coord=4:146688426..146707541:1; parent_gene=GRMZM2G120373		1.27925
27.4	RNA.RNA binding	grmzm2g126120_t01	Transcript	moderately similar to ( 464) AT5G15270 | Symbols: | KH domain-containing protein | chr5:4958738-4960947 FORWARDhighly similar to ( 763) loc_os03g25970 12003.m34871 protein nucleic acid binding protein, putative, expressed seq=cds; coord=9:118937736..118942951:-1; parent_gene=GRMZM2G126120		0.748221	0.594692
27.4	RNA.RNA binding	grmzm2g005459_t01	Transcript	moderately similar to ( 459) AT4G03110 | Symbols: | RNA-binding protein, putative | chr4:1376710-1379275 REVERSEhighly similar to ( 642) loc_os01g71200 12001.m13163 protein RNA binding protein, putative, expressed seq=cds; coord=8:159380253..159386676:-1; parent_gene=GRMZM2G005459		0.94539	0.813983
27.4	RNA.RNA binding	grmzm2g144890_t01	Transcript	moderately similar to ( 399) AT3G07810 | Symbols: | heterogeneous nuclear ribonucleoprotein, putative / hnRNP, putative | chr3:2492875-2495102 FORWARDhighly similar to ( 679) loc_os07g39560 12007.m29242 protein RNA-binding protein, putative, expressed seq=cds; coord=2:232460108..232468467:1; parent_gene=GRMZM2G144890		1.0863	1.08783
27.4	RNA.RNA binding	grmzm5g846140_t01	Transcript	moderately similar to ( 318) AT3G08620 | Symbols: | KH domain-containing protein | chr3:2617925-2620314 FORWARDmoderately similar to ( 450) loc_os01g60260 12001.m150757 protein protein held out wings, putative, expressed seq=cds; coord=3:185680297..185687428:-1; parent_gene=GRMZM5G846140		1.00269	0.768894
27.4	RNA.RNA binding	grmzm2g329864_t01	Transcript	very weakly similar to (96.7) AT5G58040 | Symbols: ATFIP1[V] | ATFIP1[V] (Arabidopsis homolog of yeast Fip1 [V]); RNA binding / protein binding | chr5:23488865-23494000 FORWARDmoderately similar to ( 261) loc_os03g51520 12003.m35398 protein fip1 motif family protein, expressed seq=cds; coord=1:270833166..270836979:-1; parent_gene=GRMZM2G329864		1.19831	1.35715
27.4	RNA.RNA binding	grmzm2g022313_t01	Transcript	moderately similar to ( 441) AT3G07810 | Symbols: | heterogeneous nuclear ribonucleoprotein, putative / hnRNP, putative | chr3:2492875-2495102 FORWARDvery weakly similar to (95.5) ROC1_NICSY 29 kDa ribonucleoprotein A, chloroplast precursor (CP29A) - Nicotiana sylvestris (Wood tobacco)highly similar to ( 795) loc_os07g39560 12007.m29242 protein RNA-binding protein, putative, expressed seq=cds; co…		1.03704	0.87381
27.4	RNA.RNA binding	grmzm2g154010_t01	Transcript	moderately similar to ( 351) AT3G27700 | Symbols: | RNA recognition motif (RRM)-containing protein | chr3:10257681-10261330 REVERSEhighly similar to ( 886) loc_os04g32340 12004.m08332 protein RNA recognition motif family protein, expressed seq=cds; coord=2:66392888..66397811:1; parent_gene=GRMZM2G154010		0.980741
27.4	RNA.RNA binding	grmzm2g039650_t01	Transcript	highly similar to ( 574) AT5G01270 | Symbols: CPL2, ATCPL2 | CPL2; double-stranded RNA binding / phosphatase | chr5:108163-112143 REVERSEnearly identical (1122) loc_os01g63820 12001.m150777 protein CPL2, putative, expressed seq=cds; coord=3:177670902..177684978:1; parent_gene=GRMZM2G039650		1.00179	1.02117
27.4	RNA.RNA binding	grmzm2g162954_t01	Transcript	moderately similar to ( 456) AT3G07810 | Symbols: | heterogeneous nuclear ribonucleoprotein, putative / hnRNP, putative | chr3:2492875-2495102 FORWARDvery weakly similar to (93.2) ROC1_NICPL 30 kDa ribonucleoprotein, chloroplast precursor (CP-RBP30) - Nicotiana plumbaginifolia (Leadwort-leaved tobacco)highly similar to ( 732) loc_os07g39560 12007.m29242 protein RNA-binding protein, putative, expr…		1.24904	1.11941
27.4	RNA.RNA binding	grmzm2g042615_t01	Transcript	moderately similar to ( 437) AT1G09230 | Symbols: | RNA recognition motif (RRM)-containing protein | chr1:2979637-2982563 REVERSEhighly similar to ( 607) loc_os03g21020 12003.m07509 protein RNA-binding region, putative, expressed seq=cds; coord=1:53340570..53346116:-1; parent_gene=GRMZM2G042615		0.783165	0.684395
27.4	RNA.RNA binding	grmzm2g069816_t01	Transcript	moderately similar to ( 306) AT1G32790 | Symbols: CID11 | RNA-binding protein, putative | chr1:11875028-11877188 REVERSEmoderately similar to ( 410) loc_os01g11120 12001.m07732 protein CID11, putative, expressed seq=cds; coord=8:23960653..23965065:-1; parent_gene=GRMZM2G069816		1.08774	0.976446
27.4	RNA.RNA binding	grmzm2g582965_t01	Transcript	weakly similar to ( 126) AT2G28380 | Symbols: DRB2 | DRB2 (DSRNA-BINDING PROTEIN 2); double-stranded RNA binding | chr2:12134098-12135915 REVERSEmoderately similar to ( 338) loc_os01g56520 12001.m11808 protein double-stranded RNA binding motif family protein, expressed seq=cds; coord=3:192781455..192788053:-1; parent_gene=GRMZM2G582965		0.726146	0.627896
27.4	RNA.RNA binding	grmzm2g114789_t01	Transcript	moderately similar to ( 275) AT4G17720 | Symbols: | RNA recognition motif (RRM)-containing protein | chr4:9862660-9864498 REVERSEmoderately similar to ( 478) loc_os03g50560 12003.m101468 protein RNA recognition motif containing protein, putative, expressed seq=cds; coord=5:10541987..10545884:-1; parent_gene=GRMZM2G114789		1.49913	1.34921
27.4	RNA.RNA binding	grmzm2g042683_t01	Transcript	moderately similar to ( 250) AT2G37220 | Symbols: | 29 kDa ribonucleoprotein, chloroplast, putative / RNA-binding protein cp29, putative | chr2:15634980-15636331 REVERSEmoderately similar to ( 246) ROC1_NICSY 29 kDa ribonucleoprotein A, chloroplast precursor (CP29A) - Nicotiana sylvestris (Wood tobacco)moderately similar to ( 310) loc_os03g25960 12003.m07940 protein ribonucleoprotein A, chloropla…		1.11078	1.14349
27.4	RNA.RNA binding	grmzm2g128809_t01	Transcript	moderately similar to ( 449) AT4G03110 | Symbols: | RNA-binding protein, putative | chr4:1376710-1379275 REVERSEhighly similar to ( 650) loc_os05g30980 12005.m27581 protein ribonucleoprotein, putative, expressed seq=cds; coord=8:84784790..84789738:1; parent_gene=GRMZM2G128809		1.12385	1.12793
27.4	RNA.RNA binding	ac198353.5_fgt004	Transcript	highly similar to ( 595) AT3G13180 | Symbols: | NOL1/NOP2/sun family protein / antitermination NusB domain-containing protein | chr3:4236326-4239966 REVERSEhighly similar to ( 635) loc_os09g30100 12009.m060003 protein ribosomal RNA small subunit methyltransferase B, putative, expressed seq=cds; coord=2:188770909..188785073:1; parent_gene=AC198353.5_FG004		1.36724	1.15447
27.4	RNA.RNA binding	grmzm2g143568_t01	Transcript	moderately similar to ( 448) AT5G46190 | Symbols: | KH domain-containing protein | chr5:18723435-18725834 REVERSEhighly similar to ( 591) loc_os08g10030 12008.m05137 protein nucleic acid binding protein, putative, expressed seq=cds; coord=10:61378667..61384801:1; parent_gene=GRMZM2G143568		1.36954	1.01074
27.4	RNA.RNA binding	grmzm2g163297_t01	Transcript	weakly similar to ( 118) AT5G54580 | Symbols: | RNA recognition motif (RRM)-containing protein | chr5:22171332-22172656 FORWARDweakly similar to ( 149) loc_os07g36490 12007.m07900 protein ELAV-like protein 4, putative, expressed seq=cds; coord=2:204478230..204482762:1; parent_gene=GRMZM2G163297		0.982738	1.3436
27.4	RNA.RNA binding	grmzm2g172011_t01	Transcript	moderately similar to ( 322) AT5G32450 | Symbols: | RNA recognition motif (RRM)-containing protein | chr5:12079707-12081317 FORWARDmoderately similar to ( 453) loc_os03g53770 12003.m10346 protein RNA-binding region RNP-1, putative, expressed seq=cds; coord=5:7263853..7267869:-1; parent_gene=GRMZM2G172011		1.21919	1.23626
27.4	RNA.RNA binding	grmzm2g113513_t01	Transcript	weakly similar to ( 115) AT5G06210 | Symbols: | RNA-binding protein, putative | chr5:1878497-1879515 FORWARDweakly similar to ( 184) loc_os04g33810 12004.m08476 protein glycine-rich RNA-binding protein 2, mitochondrial precursor, putative, expressed seq=cds; coord=2:56191723..56194333:1; parent_gene=GRMZM2G113513		0.908783	1.24552
27.4	RNA.RNA binding	grmzm2g358416_t01	Transcript	weakly similar to ( 182) AT5G12190 | Symbols: | RNA recognition motif (RRM)-containing protein | chr5:3940731-3941105 REVERSEmoderately similar to ( 212) loc_os03g59710 12003.m10867 protein pre-mRNA branch site p14-like protein, putative, expressed seq=cds; coord=5:3067817..3068209:-1; parent_gene=GRMZM2G358416		-1.07862
27.4	RNA.RNA binding	grmzm5g872217_t01	Transcript	moderately similar to ( 308) AT2G21440 | Symbols: | RNA recognition motif (RRM)-containing protein | chr2:9173712-9179065 REVERSEhighly similar to ( 519) loc_os03g58720 12003.m10776 protein RNA-binding protein 28, putative, expressed seq=cds; coord=5:3856747..3861675:1; parent_gene=GRMZM5G872217		1.22955
27.4	RNA.RNA binding	ac217556.3_fgt003	Transcript	weakly similar to ( 153) loc_os10g08570 12010.m04205 protein RNA recognition motif family protein, expressed seq=cds; coord=5:37931456..37936949:-1; parent_gene=AC217556.3_FG003		1.28151	1.12115
27.4	RNA.RNA binding	grmzm2g008410_t01	Transcript	moderately similar to ( 333) AT5G04430 | Symbols: BTR1, BTR1S | BTR1L (BINDING TO TOMV RNA 1L (LONG FORM)); nucleic acid binding / single-stranded RNA binding | chr5:1250602-1253523 REVERSEhighly similar to ( 505) loc_os02g57640 12002.m10785 protein RNA-binding protein Nova-1, putative, expressed seq=cds; coord=4:170332797..170339707:-1; parent_gene=GRMZM2G008410		0.956165	0.987726
27.4	RNA.RNA binding	grmzm2g165901_t01	Transcript	weakly similar to ( 138) AT2G21660 | Symbols: ATGRP7, CCR2 | CCR2 (COLD, CIRCADIAN RHYTHM, AND RNA BINDING 2); RNA binding / double-stranded DNA binding / single-stranded DNA binding | chr2:9265477-9266316 REVERSEweakly similar to ( 172) GRPA_MAIZE Glycine-rich RNA-binding, abscisic acid-inducible protein - Zea mays (Maize)weakly similar to ( 149) loc_os03g46770 12003.m34905 protein glycine-rich …		-0.467786
27.4	RNA.RNA binding	grmzm5g803275_t01	Transcript	weakly similar to ( 169) AT1G51510 | Symbols: Y14 | Y14; RNA binding / protein binding | chr1:19103072-19104753 REVERSEmoderately similar to ( 214) loc_os05g04850 12005.m083613 protein RNA-binding protein 8A, putative, expressed seq=cds; coord=10:88191606..88197105:1; parent_gene=GRMZM5G803275			0.693959
27.4	RNA.RNA binding	grmzm2g119146_t01	Transcript	moderately similar to ( 359) AT4G26000 | Symbols: PEP | PEP (PEPPER); RNA binding / nucleic acid binding | chr4:13197280-13199539 FORWARDhighly similar to ( 621) loc_os10g41440 12010.m06908 protein nucleic acid binding protein, putative, expressed seq=cds; coord=9:115327106..115330655:-1; parent_gene=GRMZM2G119146			0.938963
27.4	RNA.RNA binding	grmzm2g153227_t01	Transcript	weakly similar to ( 112) AT2G20490 | Symbols: NOP10, EDA27 | NOP10; RNA binding | chr2:8831897-8832723 FORWARDweakly similar to ( 133) loc_os02g40514 12002.m100551 protein h/ACA ribonucleoprotein complex subunit 3-like protein, putative, expressed seq=cds; coord=5:185447583..185451222:-1; parent_gene=GRMZM2G153227			1.35106
27.4	RNA.RNA binding	grmzm2g149698_t01	Transcript	weakly similar to ( 119) AT2G17975 | Symbols: | zinc finger (Ran-binding) family protein | chr2:7822238-7823970 REVERSEmoderately similar to ( 229) loc_os04g02000 12004.m05516 protein Zn-finger, RanBP-type, containing protein, expressed seq=cds; coord=10:92780290..92795025:1; parent_gene=GRMZM2G149698			0.94139
27.4	RNA.RNA binding	grmzm2g054048_t01	Transcript	weakly similar to ( 129) AT2G43970 | Symbols: | La domain-containing protein | chr2:18205535-18208031 REVERSEmoderately similar to ( 253) loc_os08g42980 12008.m08275 protein RNA binding protein, putative, expressed seq=cds; coord=7:90541166..90547063:-1; parent_gene=GRMZM2G054048			1.1533
27.4	RNA.RNA binding	grmzm2g427672_t01	Transcript	weakly similar to ( 169) AT5G64390 | Symbols: HEN4 | HEN4 (HUA ENHANCER 4); RNA binding / nucleic acid binding | chr5:25743442-25747380 FORWARDweakly similar to ( 177) loc_os07g25740 12007.m06852 protein KH domain containing protein, expressed seq=cds; coord=7:39630548..39641622:-1; parent_gene=GRMZM2G427672			0.738742
27.4	RNA.RNA binding	grmzm2g166780_t01	Transcript	weakly similar to ( 176) AT5G59950 | Symbols: | RNA and export factor-binding protein, putative | chr5:24140235-24141410 FORWARDmoderately similar to ( 253) loc_os03g17010 12003.m34840 protein THO complex subunit 4, putative, expressed seq=cds; coord=9:139371613..139377707:1; parent_gene=GRMZM2G166780			0.706844
27.4	RNA.RNA binding	grmzm2g104353_t01	Transcript	weakly similar to ( 163) AT5G64200 | Symbols: ATSC35, SC35 | ATSC35; RNA binding / nucleic acid binding / nucleotide binding | chr5:25681849-25683553 REVERSEweakly similar to ( 178) loc_os08g37960 12008.m26517 protein splicing factor, arginine/serine-rich 2, putative, expressed seq=cds; coord=1:67248423..67252880:1; parent_gene=GRMZM2G104353			0.783277
27.4	RNA.RNA binding	grmzm2g051890_t01	Transcript	moderately similar to ( 293) AT4G17720 | Symbols: | RNA recognition motif (RRM)-containing protein | chr4:9862660-9864498 REVERSEmoderately similar to ( 405) loc_os06g02240 12006.m04958 protein nucleic acid binding protein, putative, expressed seq=cds; coord=9:26618156..26621708:1; parent_gene=GRMZM2G051890			0.755068
27.4	RNA.RNA binding	grmzm2g003897_t01	Transcript	weakly similar to ( 143) AT5G54580 | Symbols: | RNA recognition motif (RRM)-containing protein | chr5:22171332-22172656 FORWARDmoderately similar to ( 207) loc_os08g04440 12008.m26808 protein nucleolin, putative, expressed seq=cds; coord=10:83447249..83454536:1; parent_gene=GRMZM2G003897			1.3864
27.4	RNA.RNA binding	grmzm2g073567_t01	Transcript	weakly similar to ( 159) AT1G07350 | Symbols: | transformer serine/arginine-rich ribonucleoprotein, putative | chr1:2258816-2259586 REVERSEweakly similar to ( 184) loc_os03g15890 12003.m35139 protein arginine/serine-rich splicing factor RSP41, putative, expressed seq=cds; coord=9:140519494..140523094:1; parent_gene=GRMZM2G073567			0.450805
27.4	RNA.RNA binding	grmzm2g060977_t01	Transcript	moderately similar to ( 456) AT4G36960 | Symbols: | RNA recognition motif (RRM)-containing protein | chr4:17427349-17429589 FORWARDvery weakly similar to (82.4) ROC3_NICSY 28 kDa ribonucleoprotein, chloroplast precursor (28RNP) - Nicotiana sylvestris (Wood tobacco)highly similar to ( 627) loc_os01g71770 12001.m13216 protein heterogeneous nuclear ribonucleoprotein 27C, putative, expressed seq=cds;…			0.404798
27.4	RNA.RNA binding	grmzm2g046313_t01	Transcript	weakly similar to ( 129) AT3G26120 | Symbols: TEL1 | TEL1 (TERMINAL EAR1-LIKE 1); RNA binding / nucleic acid binding / nucleotide binding | chr3:9546398-9549186 FORWARDweakly similar to ( 139) PLA2_ORYSA Protein terminal ear1 homolog (Protein PLASTOCHRON2) (Protein LEAFY HEAD2) - Oryza sativa (Rice)weakly similar to ( 152) loc_os09g36140 12009.m06563 protein RNA recognition motif 2 family protein…			0.931977
27.4	RNA.RNA binding	grmzm2g025281_t01	Transcript	weakly similar to ( 195) AT5G64200 | Symbols: ATSC35, SC35 | ATSC35; RNA binding / nucleic acid binding / nucleotide binding | chr5:25681849-25683553 REVERSEmoderately similar to ( 211) loc_os07g43050 12007.m079757 protein splicing factor, arginine/serine-rich 2, putative, expressed seq=cds; coord=7:166680013..166686364:1; parent_gene=GRMZM2G025281			0.517437
27.4	RNA.RNA binding	grmzm2g108677_t01	Transcript	moderately similar to ( 364) AT2G38610 | Symbols: | KH domain-containing protein | chr2:16147552-16149638 REVERSEmoderately similar to ( 492) loc_os03g60110 12003.m10905 protein nucleic acid binding protein, putative, expressed seq=cds; coord=5:2803821..2807888:-1; parent_gene=GRMZM2G108677			0.971602
27.4	RNA.RNA binding	grmzm2g171921_t01	Transcript	weakly similar to ( 171) AT5G37720 | Symbols: | RNA and export factor-binding protein, putative | chr5:14981805-14983978 REVERSEmoderately similar to ( 294) loc_os08g33120 12008.m62010 protein THO complex subunit 4, putative, expressed seq=cds; coord=4:80533096..80538602:-1; parent_gene=GRMZM2G171921			0.445125
27.4	RNA.RNA binding	grmzm2g005374_t01	Transcript	weakly similar to ( 112) loc_os01g65530 12001.m12664 protein RNA recognition motif family protein, expressed seq=cds; coord=8:165555388..165560077:-1; parent_gene=GRMZM2G005374			0.890028
27.4	RNA.RNA binding	grmzm5g819452_t01	Transcript	weakly similar to ( 177) AT2G21440 | Symbols: | RNA recognition motif (RRM)-containing protein | chr2:9173712-9179065 REVERSEmoderately similar to ( 328) loc_os03g60930 12003.m10980 protein RNA-binding protein 28, putative seq=cds; coord=5:3828602..3830851:1; parent_gene=GRMZM5G819452			0.779749
27.4	RNA.RNA binding	grmzm2g082931_t01	Transcript	weakly similar to ( 139) AT5G04280 | Symbols: | glycine-rich RNA-binding protein | chr5:1192461-1195413 FORWARDvery weakly similar to (97.1) GRP2_SORBI Glycine-rich RNA-binding protein 2 - Sorghum bicolor (Sorghum) (Sorghum vulgare)moderately similar to ( 259) loc_os07g08960 12007.m05352 protein glycine-rich RNA-binding protein 7, putative, expressed seq=cds; coord=2:232964582..232968333:-1; pare…			0.713416
27.4	RNA.RNA binding	grmzm2g175676_t01	Transcript	weakly similar to ( 141) AT4G10110 | Symbols: | RNA recognition motif (RRM)-containing protein | chr4:6309606-6310809 REVERSEmoderately similar to ( 245) loc_os05g35274 12005.m083726 protein RNA recognition motif-containing protein, putative, expressed seq=cds; coord=6:148244953..148248525:-1; parent_gene=GRMZM2G175676			0.721579
27.4	RNA.RNA binding	grmzm2g325679_t01	Transcript	moderately similar to ( 229) AT5G53060 | Symbols: | KH domain-containing protein | chr5:21515355-21518197 FORWARDmoderately similar to ( 439) loc_os06g23460 12006.m06998 protein nucleic acid binding protein, putative, expressed seq=cds; coord=6:110534288..110537419:-1; parent_gene=GRMZM2G325679			0.969964
27.4	RNA.RNA binding	grmzm2g125531_t01	Transcript	moderately similar to ( 280) AT1G09660 | Symbols: | KH domain-containing quaking protein, putative | chr1:3128205-3130791 REVERSEmoderately similar to ( 446) loc_os01g66300 12001.m12738 protein nucleic acid binding protein, putative, expressed seq=cds; coord=3:170277042..170281693:-1; parent_gene=GRMZM2G125531			0.673087
27.4	RNA.RNA binding	grmzm2g042343_t01	Transcript	weakly similar to ( 154) AT4G14300 | Symbols: | heterogeneous nuclear ribonucleoprotein, putative / hnRNP, putative | chr4:8231179-8232785 FORWARDmoderately similar to ( 375) loc_os07g03240 12007.m04795 protein ribonucleoprotein like protein, putative, expressed seq=cds; coord=2:236408643..236411957:1; parent_gene=GRMZM2G042343			0.578804
27.4	RNA.RNA binding	grmzm2g158835_t01	Transcript	moderately similar to ( 244) AT2G37220 | Symbols: | 29 kDa ribonucleoprotein, chloroplast, putative / RNA-binding protein cp29, putative | chr2:15634980-15636331 REVERSEmoderately similar to ( 248) ROC1_NICSY 29 kDa ribonucleoprotein A, chloroplast precursor (CP29A) - Nicotiana sylvestris (Wood tobacco)moderately similar to ( 320) loc_os07g43810 12007.m08606 protein ribonucleoprotein A, chloropla…			0.821663
27.4	RNA.RNA binding	grmzm2g029029_t01	Transcript	moderately similar to ( 371) AT5G56140 | Symbols: | KH domain-containing protein | chr5:22725462-22727932 FORWARDmoderately similar to ( 481) loc_os02g49080 12002.m09942 protein nucleic acid binding protein, putative, expressed seq=cds; coord=5:204083826..204089115:1; parent_gene=GRMZM2G029029			0.871232
27.4	RNA.RNA binding	grmzm2g133926_t01	Transcript	weakly similar to ( 154) AT1G16610 | Symbols: SR45 | SR45; RNA binding / protein binding | chr1:5675925-5678686 REVERSEweakly similar to ( 197) loc_os01g72890 12001.m43531 protein serine/arginine repetitive matrix protein 1, putative, expressed seq=cds; coord=8:157386210..157395665:-1; parent_gene=GRMZM2G133926			0.852889
27.4	RNA.RNA binding	grmzm2g051043_t01	Transcript	moderately similar to ( 305) AT1G32790 | Symbols: CID11 | RNA-binding protein, putative | chr1:11875028-11877188 REVERSEmoderately similar to ( 414) loc_os01g11120 12001.m07732 protein CID11, putative, expressed seq=cds; coord=3:4160378..4163818:1; parent_gene=GRMZM2G051043			0.728801
27.4	RNA.RNA binding	grmzm2g180909_t01	Transcript	moderately similar to ( 368) AT4G26000 | Symbols: PEP | PEP (PEPPER); RNA binding / nucleic acid binding | chr4:13197280-13199539 FORWARDhighly similar to ( 621) loc_os10g41440 12010.m06908 protein nucleic acid binding protein, putative, expressed seq=cds; coord=1:94872408..94875867:1; parent_gene=GRMZM2G180909			1.05669
27.4	RNA.RNA binding	grmzm2g133838_t01	Transcript	weakly similar to ( 112) AT2G20490 | Symbols: NOP10, EDA27 | NOP10; RNA binding | chr2:8831897-8832723 FORWARDweakly similar to ( 133) loc_os02g40514 12002.m100551 protein h/ACA ribonucleoprotein complex subunit 3-like protein, putative, expressed seq=cds; coord=4:140790192..140793676:-1; parent_gene=GRMZM2G133838			1.45902
27.4	RNA.RNA binding	grmzm5g837626_t01	Transcript	very weakly similar to (87.4) loc_os08g43360 12008.m080227 protein nucleic acid binding protein, putative, expressed seq=cds; coord=4:215266929..215268319:1; parent_gene=GRMZM5G837626			1.3617
27.4	RNA.RNA binding	grmzm2g464401_t01	Transcript	weakly similar to ( 150) AT4G16830 | Symbols: | nuclear RNA-binding protein (RGGA) | chr4:9470652-9472308 FORWARDmoderately similar to ( 288) loc_os05g51180 12005.m09183 protein plasminogen activator inhibitor 1 RNA-binding protein, putative, expressed seq=cds; coord=8:77429944..77433319:1; parent_gene=GRMZM2G464401			0.398008
27.4	RNA.RNA binding	grmzm2g061277_t01	Transcript	weakly similar to ( 145) loc_os06g05530 12006.m091603 protein nucleic acid binding protein, putative, expressed seq=cds; coord=9:19604251..19606252:1; parent_gene=GRMZM2G061277			0.826444
27.4	RNA.RNA binding	grmzm2g031846_t01	Transcript	weakly similar to ( 132) AT4G35785 | Symbols: | nucleic acid binding / nucleotide binding | chr4:16953708-16955127 REVERSEweakly similar to ( 182) loc_os08g29650 12008.m06968 protein arginine/serine-rich splicing factor 10, putative, expressed seq=cds; coord=4:73093695..73100832:-1; parent_gene=GRMZM2G031846			0.545081
27.4	RNA.RNA binding	grmzm2g042195_t01	Transcript	moderately similar to ( 233) AT1G76460 | Symbols: | RNA recognition motif (RRM)-containing protein | chr1:28686932-28688506 REVERSEmoderately similar to ( 424) loc_os02g48340 12002.m100339 protein RNA-binding region-containing protein 1, putative, expressed seq=cds; coord=4:162046741..162051712:1; parent_gene=GRMZM2G042195			0.634383
27.4	RNA.RNA binding	grmzm2g179715_t01	Transcript	very weakly similar to (82.0) AT4G13850 | Symbols: ATGRP2 | GR-RBP2 (GLYCINE-RICH RNA-BINDING PROTEIN 2); ATP binding / RNA binding / double-stranded DNA binding / single-stranded DNA binding | chr4:8021314-8022065 FORWARDweakly similar to ( 122) loc_os01g74340 12001.m13460 protein cold-inducible RNA-binding protein, putative, expressed seq=cds; coord=3:144093839..144095184:-1; parent_gene=GRMZM2…			0.999008
