# Supplementary material for: Regulatory modules controlling maize inflorescence architecture
Source: HighWire-hosted journal article supplement (doi:10.1101/gr.166397.113), 2013-12-04
Supplement: Supp_Table4.xlsx [file Supp_Table4.xlsx]

## Sheet: Table_S4
Supplemental Table 4. Genes that are specific or strongly enriched in either tassel or ear compared to the other.
aGenes that are either tassel- or ear-enriched based on whether in one organ, the cumulative mapped reads across samples was < 100 and 20x less reads than the other organ (organ with enriched expression).
bTotal cumulative mapped RNA-seq reads at a locus across all ear or tassel libraries. cSamples are from ear and tassel developmental series and show individual estimted FPKMs. dFunctional annotations based Refseq DNA, Entrez protein, Gene Ontology class (GO) and InterPro domains.
aTassel-enriched genes
	btotal reads		csamples								dannotation
gene.id	tassel.reads	ear.reads	ear.tip	ear.mid	ear.base	ear.1mm	ear.2mm	tas.1-2mm	tas.3-4mm	tas.5-7mm	Refseq_DNA	Entrez	GO	InterPro
GRMZM2G065989	3224	92	0.8765	0.0669	0.0881	0.1823	0.2126	6.8778	24.197	7.8036	NA	NA	NA	SPX_N
GRMZM2G436947	638.04	8	0.4343	0	0	0	0.1616	5.9648	3.6557	4.2215	EF hand family protein (LOC100283082), mRNA	EF hand family protein	calcium ion binding	EF-hand; EF_hand_Ca-bd; EF_Hand_1_Ca_BS; Parvalbumin
GRMZM2G006716	206.48	4	0	0	0	0	0.1697	2.026	0.1936	0.6865	NA	NA	metabolic process;hydrolase activity	AB_hydrolase_3
GRMZM2G079616	1074	0	0	0	0	0	0	0.6302	1.4712	10.8629	hypothetical protein LOC100191290 (LOC100191290), mRNA	hypothetical protein LOC100191290	transferase activity, transferring acyl groups other than amino-acyl groups	Transferase
GRMZM2G475536	1275.14	50.96	0.7964	0.164	0.1431	0	0.8304	1.6322	6.7879	4.66	hypothetical protein LOC100272638 (LOC100272638), mRNA	hypothetical protein LOC100272638	NA	NA
GRMZM2G062711	140.18	7	0.274	0.0265	0.041	1.9082	0.3076	0.2545	1.9571	2.1394	NA	NA	NA	Transcription_factor_TCP
GRMZM2G024680	1511.5	4.24	0.1364	0	0	0	0.0405	4.9983	4.0041	14.1115	NA	NA	NA	Tify; CCT_dom-like
GRMZM2G325683	2174.76	16	0.5324	0.1683	0.1296	0.4182	0.2072	9.9428	21.4464	32.6748	hypothetical protein LOC100276188 (LOC100276188), mRNA	hypothetical protein LOC100276188	NA	NA
GRMZM2G406024	922.76	16	2.292	0	0	0	0	10.3474	3.4927	17.0028	NA	NA	NA	NA
GRMZM2G060319	7475.08	104	1.8308	0.41	0.0416	0.4759	0.5982	0.9221	17.3482	88.1331	teosinte branched1 protein (LOC100286105), mRNA	teosinte branched1 protein	NA	Transcription_factor_TCP
GRMZM2G161827	349	0	0	0	0	0	0	0	0	0	NA	NA	NA	Glutathione_S-Trfase_N; GST_C; Glutathione-S-Trfase_C-like; Thioredoxin-like_fold
GRMZM2G122431	6629.44	230.68	1.0048	0.5993	0.2786	0.3958	0.2607	10.5155	9.4489	19.9752	NA	NA	membrane;cellulose synthase (UDP-forming) activity;cellulose biosynthetic process	NA
GRMZM2G070837	5186.86	225.68	0.7832	0.1623	0.1462	0.648	0.9543	18.3445	17.3542	7.5601	NA	NA	catalytic activity;metabolic process	AMP-dep_Synth/Lig
GRMZM2G322819	21722.9	185.5	0.6187	0.0528	0.081	0.5239	0.6976	87.3179	81.8984	0.672	NA	NA	serine-type endopeptidase activity;proteolysis;serine-type peptidase activity;serine-type endopeptidase activity;proteolysis;serine-type peptidase activity;serine-type endopeptidase activity;proteolysis;serine-type peptidase activity	Peptidase_S9A_N; Peptidase_S9; Pept_S9_AS; Peptidase_S9A
GRMZM2G432583	370.62	2	0.026	0	0	0	0	0.0774	0.4972	4.1444	hypothetical protein LOC100276372 (LOC100276372), mRNA	hypothetical protein LOC100276372	transcription factor activity;sequence-specific DNA binding;regulation of transcription	WRKY_DNA-bd
GRMZM2G332423	416.12	4	0	0	0.0915	0	0	3.3431	0.2843	2.6027	NA	NA	iron ion binding;oxidoreductase activity;oxidation reduction	Oxoglutarate/Fe-dep_oxygenase; Isopenicillin-N_synthase
GRMZM2G431504	11455.3	360.46	0.6554	2.7125	1.5719	0.3	1.6372	79.0322	30.5918	48.1811	hypothetical protein LOC100191338 (LOC100191338), mRNA	hypothetical protein LOC100191338;hypothetical protein LOC100191338	catalytic activity;3-beta-hydroxy-delta5-steroid dehydrogenase activity;steroid biosynthetic process;metabolic process;oxidoreductase activity;cellular metabolic process;coenzyme binding;catalytic activity;3-beta-hydroxy-delta5-steroid dehydrogenase activity;steroid biosynthetic process;metabolic process;oxidoreductase activity;cellular metabolic process;coenzyme binding	DH_sc/Rdtase_SDR; Epimerase_deHydtase; 3Beta_OHSteriod_DH/Estase; Male_sterile_NAD-bd
GRMZM2G034271	2284.92	40	0.1027	0.0907	0.0515	0.041	0.0243	0.4794	1.3055	7.4598	NA	NA	lipid metabolic process;metabolic process	Patatin/PhospholipaseA2-rel; Acyl_Trfase/lysoPlipase
GRMZM2G334741	1113.44	53	0.3253	0.6332	0.206	0.198	0.5293	1.8319	6.8898	13.5732	hypothetical protein LOC100276897 (LOC100276897), mRNA;hypothetical protein LOC100304198 (LOC100304198), mRNA	hypothetical protein LOC100276897;hypothetical protein LOC100304198	NA	NA
GRMZM2G424804	3076	127	0.3162	0	0.0515	0.0671	0.4446	11.6961	5.93	11.8317	NA	NA	monooxygenase activity;iron ion binding;electron carrier activity;heme binding;oxidation reduction	Cyt_P450; Cyt_P450_E_grp-I; Cyt_P450_E_grp-II; Cyt_P450_E_grp-IV
GRMZM2G029243	1520.08	54.4	0.1055	0.1818	0.1755	0.0414	0.0424	1.5836	5.1921	1.7267	NA	NA	hydrolase activity, hydrolyzing O-glycosyl compounds;carbohydrate metabolic process;hydrolase activity, hydrolyzing O-glycosyl compounds;carbohydrate metabolic process	Glyco_hydro_31
GRMZM2G075244	142	3	0	0.0374	0.0264	0	0	0.2334	0.1581	0.521	NA	NA	monooxygenase activity;iron ion binding;electron carrier activity;heme binding;oxidation reduction	NA
GRMZM2G030118	236.24	8	0	0.0866	0.0762	0	0.3933	2.2543	1.0411	0.9234	NA	NA	iron ion binding;endoplasmic reticulum;fatty acid biosynthetic process;oxidoreductase activity;homoiothermy;ice binding;response to freezing;oxidation reduction	Fatty_acid_hydroxylase; Antifreeze_1
GRMZM2G147491	142.48	0	0	0	0	0	0	0.0805	0.2562	0.8688	hypothetical protein LOC100193561 (LOC100193561), mRNA	hypothetical protein LOC100193561	methyltransferase activity;O-methyltransferase activity;protein dimerization activity	Plant_MeTrfase_dimerisation; O_MeTrfase_2; O-MeTrfase_COMT_euk
GRMZM2G104032	1063.4	14	0.0584	0.1033	0.0536	0	0	0.4072	0.7264	7.2952	NA	NA	galactoside 2-alpha-L-fucosyltransferase activity;membrane;cell wall biogenesis	XG_FTase
GRMZM2G172795	1658.58	43.8	0.3393	0.0815	0.1696	0.0669	0.2168	3.2981	3.0746	6.0244	NA	NA	nucleus;transcription regulator activity;regulation of transcription	HLH_DNA-bd_dom; HLH_DNA-bd
GRMZM2G316264	859.24	0	0	0	0	0	0	8.8692	1.4975	10.4337	NA	NA	NA	NA
GRMZM2G460893	411.58	7.22	0	0	0	0	0.2464	0	0.9558	3.7242	NA	NA	protein binding;zinc ion binding	Znf_C3HC4_RING-type; Znf_PHD; Znf_RING-CH; Znf_RING
GRMZM2G455075	1310.28	44	0.035	0.1471	0.1836	0.0985	0.1589	7.3553	2.0467	2.5138	NA	NA	metabolic process;transferase activity, transferring hexosyl groups	UDP_glucos_trans
GRMZM2G136857	1437	0	0	0	0	0	0	0.1743	0.5696	15.7811	hypothetical protein LOC100191288 (LOC100191288), mRNA	hypothetical protein LOC100191288	methyltransferase activity;methyltransferase activity	MeTrfase_7
GRMZM2G040517	2191.5	21	0	0.0898	0.285	2.7998	0.1409	32.6508	3.0782	1.161	hypothetical protein LOC100193845 (LOC100193845), mRNA	hypothetical protein LOC100193845	NA	Pollen_Ole_e1_allergen
GRMZM2G000520	297	5	0	0	0	0.0107	0.1709	1.7458	1.8268	0.4015	NA	NA	DNA binding;transcription factor activity;regulation of transcription, DNA-dependent;homoiothermy;ice binding;response to freezing	TF_ERF_DNA-bd; DNA-bd_integrase-typ; Antifreeze_1
AC187560.5_FG003	221.54	0.2	0	0	0	0.0783	0.4333	0.0005	0.0207	2.1699	NA	NA	NA	NA
GRMZM2G105522	6115.74	177.72	0.0786	0.6346	0.7394	0.1938	0.4185	7.9398	33.9933	31.5137	hypothetical protein LOC100384163 (LOC100384163), mRNA	hypothetical protein LOC100384163	NA	DUF506_pln
GRMZM2G058588	479.9	6	0.0477	0.0453	0.0452	0	0	3.3202	1.5124	0.3807	NA	NA	DNA binding;nucleus	Transcpt_factor_SBP-box
GRMZM2G180044	1050.66	26.7	0.3148	0	0.0493	0.0474	0.2688	3.8175	8.7481	6.7948	NA	NA	NA	Coiled-coil-dom_prot_109_C
GRMZM2G173926	6897.78	269.92	0.0621	0.5907	0.5639	0.2422	0.5513	5.0505	8.6448	20.3153	hypothetical protein LOC100194073 (LOC100194073), mRNA	hypothetical protein LOC100194073;hypothetical protein LOC100194073	metabolic process;transferase activity, transferring hexosyl groups;metabolic process;transferase activity, transferring hexosyl groups	UDP_glucos_trans
GRMZM5G833699	883.5	43	0.124	0.0781	0.0396	0.2157	0.2621	3.0446	0.2063	1.7064	heat shock protein HSP82 (hsp82), mRNA	heat shock protein HSP82	ATP binding;protein folding;response to stress;unfolded protein binding	Chaperone_htpG; ATPase-like_ATP-bd; Hsp90_C; Ribosomal_S5_D2-typ_fold; Heat_shock_protein_90_CS; Hsp90_N
AC209050.3_FG003	2120.52	38.22	0.3614	0.058	0.1813	0	0.0609	6.2878	9.6303	22.3793	NA	NA	transcription factor activity;sequence-specific DNA binding;regulation of transcription	WRKY_DNA-bd
GRMZM2G169329	403	17	0.1407	0.1057	0.0951	0.1447	0.1141	0.6736	1.5224	3.7817	LOC100274367 (TIDP2662), mRNA	LOC100274367	NA	SOUL_haem-bd
GRMZM2G111462	139.68	5.46	0.0364	0.0253	0	0.099	0.0315	0.5857	0.0228	0.0226	NA	NA	nucleotide binding;ATP binding;transport;integral to membrane;phosphotransferase activity, alcohol group as acceptor;ATPase activity;nucleoside-triphosphatase activity;ATPase activity, coupled to transmembrane movement of substances;transmembrane transport	ABC_transptr_TM_dom; ABC_transporter-like; ABC_transptrTM_dom_typ1; ATPase_AAA+_core; Uridine_kinase; ABC_transporter_CS
GRMZM2G168898	679.18	21.84	0.2825	0.0983	0.1596	0.0613	0.5243	7.1419	3.4102	2.2974	hemoglobin 2 (Hb2), mRNA	hemoglobin 2	iron ion binding;extracellular region;hemoglobin complex;oxygen transport;type I hypersensitivity;oxygen binding;heme binding;homoiothermy;ice binding;response to freezing	Globin_subset; Globin-like; Leghaemoglobin; Erythrocruorin; Globin_annelid-type; POA_allergen_C; Antifreeze_1
GRMZM2G325693	5963	105	2.1785	0.2275	0.1747	0.3251	0.4557	13.9148	23.3675	49.424	hypothetical protein LOC100277209 (LOC100277209), mRNA;hypothetical protein LOC100384236 (LOC100384236), mRNA	hypothetical protein LOC100277209	NA	NA
GRMZM2G370777	7745.48	148.32	0.2512	0.5177	0.5625	2.15	1.7411	39.8963	14.4137	9.0134	m19 protein (m19), mRNA	m19 protein	transcription factor activity;nucleus;regulation of transcription, DNA-dependent;sequence-specific DNA binding;transcription factor activity;nucleus;regulation of transcription, DNA-dependent;sequence-specific DNA binding;transcription factor activity;nucleus;regulation of transcription, DNA-dependent;sequence-specific DNA binding	NA
GRMZM2G042895	42913.9	947.72	4.5054	0.4651	0.2035	0.3948	7.4535	307.376	172.482	245.88	DNA binding like (LOC100284818), mRNA	DNA binding like	nucleus;transcription regulator activity;regulation of transcription	HLH_DNA-bd_dom; HLH_DNA-bd
GRMZM2G034253	294.62	6.36	0.0304	0	0.019	0.0483	0.2322	0.9602	0.1792	0.0917	NA	NA	two-component sensor activity;two-component response regulator activity;two-component signal transduction system (phosphorelay);ATP binding;regulation of transcription, DNA-dependent;signal transduction;membrane;phosphorylation;transferase activity, transferring phosphorus-containing groups	Sig_transdc_His_kin_sub1_dim/P; ATPase-like_ATP-bd; Sig_transdc_resp-reg_receiver; CheY-like; Sig_transdc_His_kin-like_C
AC217910.3_FG004	530.76	16.98	0.1968	0.2665	0.1453	0	0.164	1.8318	2.5429	5.789	LOC100276545 (IDP856), mRNA	LOC100276545	metabolic process;oxidoreductase activity;oxidation reduction	Glc/ribitol_DH
GRMZM2G047910	6904.18	270.92	0.0621	0.5907	0.5803	0.2422	0.5513	5.1321	8.4368	20.4698	hypothetical protein LOC100194073 (LOC100194073), mRNA	hypothetical protein LOC100194073;hypothetical protein LOC100194073	metabolic process;transferase activity, transferring hexosyl groups;metabolic process;transferase activity, transferring hexosyl groups	UDP_glucos_trans
GRMZM2G140996	1731.62	40.56	0	0.2484	0.6227	0	0.0231	1.9392	1.2908	15.2565	O-methyltransferase ZRP4 (LOC100282209), mRNA	O-methyltransferase ZRP4	serine-type endopeptidase inhibitor activity;methyltransferase activity;O-methyltransferase activity;protein dimerization activity	Plant_MeTrfase_dimerisation; O_MeTrfase_2; Protease_inhib_I4_serpin; O-MeTrfase_COMT_euk
GRMZM2G110567	6481.5	91	0.1557	0.2169	0.4493	0	0.0749	0.8933	2.8614	43.6041	protein binding protein (LOC100284967), mRNA	protein binding protein	NA	VWF_A
GRMZM2G096403	105	2	0	0	0.2111	0	0.1267	0.6101	0.6107	2.9285	hypothetical protein LOC100275091 (LOC100275091), mRNA	hypothetical protein LOC100275091	NA	NA
GRMZM2G323422	1025.02	47	0.2138	0.1383	0	0	1.13	3.035	6.1683	13.0561	NA	NA	NA	NA
GRMZM2G136364	2446	109	0.0491	1.1945	0.8594	0.3018	0.6428	7.6647	7.7624	27.7575	lipid binding protein (LOC100281936), mRNA;LOC100284997 (IDP2455), mRNA	lipid binding protein;LOC100284997	lipid transport;lipid binding;lipid transport;lipid binding	LTP/seed_store/tryp_amyl_inhib; Bifunc_inhib/LTP/seed_store; Plant_LTP
GRMZM2G085924	324.34	13	0	0.1699	0.1849	0	0.0824	1.5358	0.2398	1.3685	herbicide safener binding protein1 (hsbp1), mRNA	herbicide safener binding protein1	methyltransferase activity;O-methyltransferase activity;protein dimerization activity	Plant_MeTrfase_dimerisation; O_MeTrfase_2; O-MeTrfase_COMT_euk
GRMZM5G815098	8676.8	0	0	0	0	0	0.3262	0.3218	7.2037	91.4862	Bowman-Birk type trypsin inhibitor (LOC100281921), mRNA;Bowman-Birk type trypsin inhibitor (LOC100281921), mRNA;Bowman-Birk type trypsin inhibitor (LOC100281921), mRNA	Bowman-Birk type trypsin inhibitor;Bowman-Birk type trypsin inhibitor;Bowman-Birk type trypsin inhibitor	serine-type endopeptidase inhibitor activity;extracellular region;serine-type endopeptidase inhibitor activity;extracellular region;serine-type endopeptidase inhibitor activity;extracellular region	Prot_inh_BBI
GRMZM2G161905	13870.4	31	0.1584	0.342	0.2366	0	0.0464	13.1485	27.7914	195.342	NA	NA	NA	Glutathione_S-Trfase_N; Glutathione-S-Trfase_C-like; Thioredoxin-like_fold
GRMZM2G068682	110.34	2	0.0665	0	0	0	0	0.5277	0.1007	0.6451	L-ascorbate oxidase (LOC100285297), mRNA	L-ascorbate oxidase	copper ion binding;oxidoreductase activity;oxidation reduction	Cu-oxidase_3; Cu-oxidase; Cu-oxidase_2; Cupredoxin
GRMZM2G077436	105.54	4.2	0	0	0.2747	0.0716	0	0.2616	0.3977	0.625	NA	NA	DNA binding;transcription factor activity;transcription initiation;regulation of transcription, DNA-dependent;sigma factor activity	NA
GRMZM2G447632	18293.6	709.94	8.2833	5.1218	1.9885	1.8556	2.382	63.1368	73.231	156.861	NA	NA	NA	Glutathione_S-Trfase_N; GST_C; Glutathione-S-Trfase_C-like; Thioredoxin-like_fold
GRMZM2G116614	27426.9	638.08	4.6501	1.4292	0.7916	3.5213	3.6727	37.5014	63.4483	221.127	hypothetical protein LOC100384222 (LOC100384222), mRNA	NA	NA	NA
GRMZM2G158890	2398.86	23	0.5957	0.2162	0.1092	0	0.3665	17.1855	7.0628	18.1438	hypothetical protein LOC100278304 (LOC100278304), mRNA	hypothetical protein LOC100278304	NA	DUF241_pln
GRMZM2G002178	77128	3271.14	3.5788	7.7736	8.4693	7.2247	14.3072	187.464	134.457	305.25	hypothetical protein LOC100279433 (LOC100279433), mRNA;hypothetical protein LOC100279433 (LOC100279433), mRNA	hypothetical protein LOC100279433;hypothetical protein LOC100279433	monooxygenase activity;iron ion binding;electron carrier activity;heme binding;monooxygenase activity;iron ion binding;electron carrier activity;heme binding	Cyt_P450; Cyt_P450_E_grp-IV
GRMZM2G055434	317.42	7	0.016	0.1049	0	0	0.1099	0.0693	1.0616	4.6966	early nodulin 20 (LOC100285040), mRNA	early nodulin 20	copper ion binding;electron carrier activity	Plcyanin-like; Cupredoxin
GRMZM2G046885	4747.24	193.44	0.204	0.4714	0.1496	4.0492	2.6573	33.0636	8.0502	4.6704	m26 protein (m26), mRNA;hypothetical protein LOC100217247 (LOC100217247), mRNA	m26 protein;hypothetical protein LOC100217247	transcription factor activity;nucleus;regulation of transcription, DNA-dependent;sequence-specific DNA binding;transcription factor activity;nucleus;regulation of transcription, DNA-dependent;sequence-specific DNA binding	TF_MADSbox; TF_Kbox
GRMZM2G368610	158	0	0	0	0	0	0	0.8264	0.2292	0.7947	hypothetical protein LOC100191842 (LOC100191842), mRNA	hypothetical protein LOC100191842	triglyceride lipase activity;lipid metabolic process	Lipase_3
GRMZM2G011523	162977	7950.02	66.949	64.5628	47.193	68.9392	174.074	328.649	579.846	2787.94	Bowman-Birk type wound-induced proteinase inhibitor WIP1 (LOC100281945), mRNA;Bowman-Birk type wound-induced proteinase inhibitor WIP1 (LOC100286070), mRNA;hypothetical protein LOC100276951 (LOC100276951), mRNA	Bowman-Birk type wound-induced proteinase inhibitor WIP1;hypothetical protein LOC100276951;Bowman-Birk type wound-induced proteinase inhibitor WIP1	serine-type endopeptidase inhibitor activity;extracellular region;serine-type endopeptidase inhibitor activity;extracellular region;serine-type endopeptidase inhibitor activity;extracellular region;serine-type endopeptidase inhibitor activity;extracellular region;serine-type endopeptidase inhibitor activity;extracellular region	Prot_inh_BBI
GRMZM2G000652	4232.98	71.24	0.3194	0.4284	0.6044	0.0492	0.3621	3.9136	8.8761	36.062	NA	NA	lipid metabolic process;metabolic process	Patatin/PhospholipaseA2-rel; Acyl_Trfase/lysoPlipase
GRMZM2G064360	7669.86	120	2.479	0	0.042	0	0	0.573	21.4528	65.5268	LOC100283208 (pco104428a), mRNA	LOC100283208	chitinase activity;chitin catabolic process;chitin binding;cell wall macromolecule catabolic process	Chitin-bd_1; Glyco_hydro_19_cat; Chitin-binding_1_CS
GRMZM2G436295	4959.96	143	1.3624	0.4722	0.9382	0.9284	4.9986	17.4282	64.9989	24.5977	NA	NA	NA	NA
GRMZM2G061568	995.06	39	0.3378	0.0463	0.1551	0.1343	0.1032	1.0532	1.5301	7.5749	hypothetical protein LOC100280353 (LOC100280353), mRNA	hypothetical protein LOC100280353;hypothetical protein LOC100280353	catalytic activity;membrane;catalytic activity;membrane;catalytic activity;membrane	NA
GRMZM2G159179	1577	57	0.24	0	0.0489	0.025	0.1243	5.2512	4.2955	6.5393	NA	NA	monooxygenase activity;iron ion binding;electron carrier activity;heme binding;oxidation reduction	Cyt_P450; Cyt_P450_E_grp-I; Cyt_P450_E_grp-II; Cyt_P450_E_grp-IV
GRMZM2G085854	5075.74	145	1.2665	0.1891	0.173	0.1245	0.119	0.2523	5.2876	32.032	hydroquinone glucosyltransferase (LOC100281070), mRNA	hydroquinone glucosyltransferase	metabolic process;transferase activity, transferring hexosyl groups	UDP_glucos_trans
GRMZM2G044322	718	7	0	0	0	0.0385	0.2089	0.7122	1.3527	3.787	hypothetical protein LOC100274454 (LOC100274454), mRNA	hypothetical protein LOC100274454	nucleus;transcription regulator activity	EIN3
GRMZM2G124921	1369.76	65.98	0.1187	0.1043	0.0622	0.0296	0.0183	0.3076	0.668	3.534	patatin T5 (LOC100285633), mRNA	patatin T5	lipid metabolic process;metabolic process;lipid metabolic process;metabolic process	Patatin/PhospholipaseA2-rel; Acyl_Trfase/lysoPlipase
GRMZM2G118172	1441.96	55.86	0	0.1364	0.0987	0.0832	0.8576	12.9075	12.024	16.9597	VQ motif family protein (LOC100281024), mRNA	VQ motif family protein	homoiothermy;ice binding;response to freezing	VQ; Antifreeze_1
GRMZM5G805389	2254.88	64.3	0.6534	0.0214	0.004	0.2734	0.4174	9.7343	28.5822	4.306	NA	NA	NA	NA
GRMZM2G115070	1744	48	0	0	0.0401	0.0463	3.6596	29.648	19.7871	18.7471	hypothetical protein LOC100275216 (LOC100275216), mRNA	hypothetical protein LOC100275216	DNA binding	Myb_DNA-bd; Homeodomain-like; SANT_DNA-bd; Myb-like+DNA-bd_dom_SHAQKYF
GRMZM2G516301	454.52	5.22	0.4384	0.0763	0	0.183	0.1899	0.226	5.2547	7.9688	NA	NA	transcription factor activity;sequence-specific DNA binding;regulation of transcription	WRKY_DNA-bd
GRMZM2G176998	24789.6	997	2.7626	3.5282	1.9664	0.3065	0.5907	10.4843	19.1033	109.141	NA	NA	NA	PD40
GRMZM2G164074	283	12	0.1676	0	0	0	0	0.0643	1.2249	2.8925	hypothetical protein LOC100381980 (LOC100381980), mRNA	hypothetical protein LOC100381980	monooxygenase activity;iron ion binding;electron carrier activity;heme binding;oxidation reduction;monooxygenase activity;iron ion binding;electron carrier activity;heme binding;oxidation reduction	Cyt_P450; Cyt_P450_E_grp-I; Cyt_P450_E_grp-IV; Cyt_P450_E_grp-II
GRMZM2G055834	142.78	3	0.0188	0	0	0.0567	0	0.0196	0.1945	0.8375	hypothetical protein LOC100191709 (LOC100191709), mRNA	hypothetical protein LOC100191709	transporter activity;transport;oligopeptide transport;membrane;transmembrane transport	Oligopeptide_transporter; MFS_general_subst_transpt; Sugar_transporter_CS; PTR2_symporter_CS; TAT_signal
GRMZM2G179063	728	0	0	0	0	0	0	4.8383	12.1985	0	hypothetical protein LOC100382444 (LOC100382444), mRNA	hypothetical protein LOC100382444	metabolic process;transferase activity, transferring hexosyl groups	UDP_glucos_trans
GRMZM2G055180	2935.8	145.82	0.5073	0.9957	0.5146	0.0566	0.1339	3.249	8.994	25.1697	ethylene-responsive transcription factor 2 (LOC100285687), mRNA	ethylene-responsive transcription factor 2	DNA binding;transcription factor activity;regulation of transcription, DNA-dependent	TF_ERF_DNA-bd; DNA-bd_integrase-typ
GRMZM2G179616	182.52	0	0	0	0	0	0	0	0	2.6055	NA	NA	NA	DUF1677_pln
GRMZM2G042789	7696	39	0.9874	0.1442	0.2435	1.4569	0.7176	18.9086	68.2313	153.914	NA	NA	serine-type endopeptidase inhibitor activity;response to wounding	Prot_inh_pot1
GRMZM2G360681	65611.3	2860.22	3.1632	4.6007	3.4897	8.0337	4.1346	98.9156	35.4881	181.608	heat-shock protein 101 (hsp101), mRNA	heat-shock protein 101	nucleotide binding;protein binding;ATP binding;GTP binding;endoplasmic reticulum;ATPase activity;nucleoside-triphosphatase activity;protein metabolic process;chaperone mediated protein folding requiring cofactor	Clp_N; ATPase_AAA_core; ATPase_AAA-5; Torsin; ATPase_AAA-2; Clp_ATPase_C; ATPase_AAA+_core; Chaprnin_clpA/B; GTP1_OBG; Chaperonin_ClpA/B_CS
GRMZM2G046163	605.94	28.74	0.1982	0.1327	0.1164	0	0.1652	1.4462	0.5496	3.6681	LOC100273163 (csu868(trp)), mRNA	LOC100273163	catalytic activity;tryptophan synthase activity;tryptophan metabolic process;metabolic process	Trp_synthaseA; RibuloseP-bd_barrel; Trp_synthase_alpha_AS
GRMZM2G174562	1749.94	0	0	0	0	0	0.0524	0	1.3558	23.9957	NA	NA	serine-type endopeptidase inhibitor activity;extracellular region	Prot_inh_BBI
GRMZM2G101745	954.16	22	0.5591	0.1213	0.1393	0.2969	0.5943	8.5456	4.0856	4.0391	NA	NA	NA	NA
GRMZM2G074743	592.48	9.6	0.0994	0.0576	0.0854	0	0.0851	0.9534	1.3823	4.569	alternative oxidase AOX3 precursor (aox3), mRNA	alternative oxidase AOX3 precursor	mitochondrial envelope;respiratory gaseous exchange;oxidation reduction;mitochondrial envelope;respiratory gaseous exchange;oxidation reduction	AOX
GRMZM2G158394	11475.2	11.16	0.1554	0.0676	0.089	0	0.0946	1.2841	23.4562	144.514	knotted1 induced1 (kin1), mRNA	knotted1 induced1	RNA binding;ribonuclease T2 activity;RNA binding;ribonuclease T2 activity;RNA binding;ribonuclease T2 activity;RNA binding;ribonuclease T2 activity	RNase_T2
GRMZM2G389582	1625.42	51.38	0.2325	0.0219	0.0233	0	0.1082	1.4102	4.0836	4.2288	NA	NA	chitinase activity;chitin catabolic process;cell wall macromolecule catabolic process	Glyco_hydro_19_cat
GRMZM2G015419	544047	1303.7	5.8828	1.8125	1.2251	0.8017	1.1978	116.312	476.645	2098.45	lipoxygenase (LOX10), mRNA	lipoxygenase	iron ion binding;lipoxygenase activity;oxidoreductase activity, acting on single donors with incorporation of molecular oxygen, incorporation of two atoms of oxygen;metal ion binding;oxidation reduction;iron ion binding;lipoxygenase activity;oxidoreductase activity, acting on single donors with incorporation of molecular oxygen, incorporation of two atoms of oxygen;metal ion binding;oxidation red…	LipOase_LH2; LipOase_C; Lipase_LipOase; LipOase_CS; LipOase_Fe_BS; LipOase_pln
GRMZM2G307756	1227.22	59.76	3.5476	0.3608	0.5778	0.6525	0.6919	2.4166	7.8544	22.9843	NA	NA	NA	NA
GRMZM2G036297	1471.3	15.06	0.0225	0	0.0821	0.0645	0.0789	11.8354	2.6274	1.244	liguleless1 (lg1), mRNA	liguleless1	DNA binding;nucleus	Transcpt_factor_SBP-box
GRMZM2G479038	785	28	0.1436	0.091	0.1074	0	0.1845	0.4649	0.612	4.811	cytokinin-O-glucosyltransferase 3 (LOC100281698), mRNA	cytokinin-O-glucosyltransferase 3	metabolic process;transferase activity, transferring hexosyl groups	UDP_glucos_trans
GRMZM2G041866	149.76	1	0	0	0.0738	0.0854	0.0886	0.1635	0.2255	1.2305	LOC100283159 (umc2690), mRNA	LOC100283159	methyltransferase activity;O-methyltransferase activity;protein dimerization activity	Plant_MeTrfase_dimerisation; O_MeTrfase_2; O-MeTrfase_COMT_euk
GRMZM2G085381	2008.12	22.92	0.2636	0	0	0.0695	0.0257	0.2414	1.5512	16.2128	benzoxazinless1 (bx1), mRNA	benzoxazinless1	catalytic activity;tryptophan synthase activity;tryptophan metabolic process;metabolic process;homoiothermy;ice binding;response to freezing;catalytic activity;tryptophan synthase activity;tryptophan metabolic process;metabolic process;homoiothermy;ice binding;response to freezing;catalytic activity;tryptophan synthase activity;tryptophan metabolic process;metabolic process;homoiothermy;ice bindi…	Trp_synthaseA; RibuloseP-bd_barrel; Trp_synthase_alpha_AS; Antifreeze_1
GRMZM2G143324	233	8	0	0.1206	0.0509	0.5996	0.1818	1.8905	2.6946	1.1314	NA	NA	NA	NA
GRMZM2G437912	19742	726.64	3.6149	1.3018	1.6057	0.3771	2.1098	57.9097	33.3153	81.8308	hypothetical protein LOC100193934 (LOC100193934), mRNA	hypothetical protein LOC100193934	prephenate dehydratase activity;L-phenylalanine biosynthetic process	Preph_deHydtase; Preph_deHydtase_CS
GRMZM2G434541	20985.2	893	31.7814	8.0898	4.9534	2.6743	5.9268	68.6048	126.474	396.667	NA	NA	NA	Glutathione_S-Trfase_N; Thioredoxin-like_fold; Glutathione-S-Trfase_C-like
GRMZM2G022934	42717.4	1779.78	4.5359	7.1939	7.4318	0.4384	3.7468	4.8563	37.2954	284.798	NA	NA	catalytic activity;catalytic activity	Thioredoxin-like_fold; AB_hydrolase_1; Epox_hydrolase-like
GRMZM2G165757	1036.94	51.36	0.026	0.219	0.2449	0.1229	0.0135	0.5832	1.8187	6.7768	NA	NA	ATP binding;membrane;ATPase activity;phosphopantetheine binding;membrane	ABC_2_trans
GRMZM2G016264	1640	48	0.1152	0	0.0289	0.0234	0.1917	2.72	2.76	6.6534	NA	NA	monooxygenase activity;iron ion binding;electron carrier activity;heme binding;oxidation reduction	Cyt_P450; Cyt_P450_E_grp-I; Cyt_P450_E_grp-II; Cyt_P450_E_grp-IV
GRMZM2G103197	2124.78	0	0	0	0	0	0.1102	23.4372	3.3229	6.7755	NA	NA	electron carrier activity;oxidoreductase activity;electron carrier activity;oxidoreductase activity	Chlorophyllase-like; Ph_dOase_redase
GRMZM2G154523	253899	7938.56	101.338	11.7062	13.8062	2.3173	7.9359	260.25	361.171	1562.93	LOC100284823 (umc1509), mRNA	LOC100284823	lipid metabolic process;metabolic process;metabolic process	Acyl_Trfase/lysoPlipase
AC155434.2_FG001	503.38	17.02	0.1595	0.1307	0.126	0	0.3872	5.3824	1.3927	1.0527	NA	NA	NA	AB_hydrolase_1
GRMZM2G070825	32461.9	144.64	0.5368	0.2724	0.1771	0.2742	1.7112	82.6237	103.97	191.748	hypothetical protein LOC100191748 (LOC100191748), mRNA	hypothetical protein LOC100191748	sugar:hydrogen symporter activity;lipid metabolic process;phosphoenolpyruvate-dependent sugar phosphotransferase system;hydrolase activity, acting on ester bonds;lipid metabolic process;hydrolase activity, acting on ester bonds	Lipase_GDSL; Esterase_SGNH_hydro-type
GRMZM2G166616	232	2	0	0	0.0259	0	0	1.7631	0.0799	2.02	NA	NA	iron ion binding;oxidoreductase activity;oxidation reduction	Oxoglutarate/Fe-dep_oxygenase; Isopenicillin-N_synthase
GRMZM5G838098	1658.08	48	0.531	0.4183	0.1534	0.0296	0.6815	2.2588	5.7945	16.9678	pnFL-2 (LOC100281912), mRNA	pnFL-2	type I hypersensitivity	Tify; CCT_dom-like; POA_allergen_C
GRMZM2G493395	17348.5	715	2.4816	0.6547	1.1723	0.5637	1.0063	50.7405	11.8081	49.2329	NA	NA	catalytic activity;metabolic process;1-deoxy-D-xylulose-5-phosphate synthase activity;terpenoid biosynthetic process	Transketolase-like_Pyr-bd; Transketolase_C; Transketo_C/Pyr-ferredox_oxred; Transketolase_N; Transketolase_BS; Dxylulose-5-P_synthase
GRMZM2G014844	13792.7	226.58	0.1192	0.9473	2.636	0	0.1255	3.4142	3.6307	81.915	non-cyanogenic beta-glucosidase (LOC100281760), mRNA	non-cyanogenic beta-glucosidase	hydrolase activity, hydrolyzing O-glycosyl compounds;carbohydrate metabolic process;hydrolase activity, hydrolyzing O-glycosyl compounds;carbohydrate metabolic process	Glyco_hydro_1; Glyco_hydro_catalytic_core; Glyco_hydro_1_AS
GRMZM2G075563	5804.86	285.64	0.6396	1.0245	1.2141	0.596	1.0051	9.7664	37.8454	22.8301	hypothetical protein LOC100194250 (LOC100194250), mRNA	hypothetical protein LOC100194250	NA	TPR_repeat
GRMZM2G091956	2510	62	0.1634	0.1169	0.0686	0.0352	0.0231	0.754	2.7749	7.3326	NA	NA	lipid metabolic process;metabolic process	Patatin/PhospholipaseA2-rel; Acyl_Trfase/lysoPlipase
GRMZM2G421509	197.84	6	0	0	0	0.0676	0.0769	1.9869	0.299	0.0702	NA	NA	flavin-containing monooxygenase activity;FAD binding;NADP or NADPH binding;oxidation reduction	Flavin_mOase-like
GRMZM2G070304	14041.4	326.98	2.2363	0.0494	0	1.985	1.0909	68.8844	25.2371	38.7947	NA	NA	metabolic process;acyltransferase activity	Acyltransferase
GRMZM2G067485	174.36	0	0	0	0	0	0	0	0.2363	1.7492	hypothetical protein LOC100279835 (LOC100279835), mRNA;Bowman-Birk type trypsin inhibitor (LOC100280479), mRNA	Bowman-Birk type trypsin inhibitor	serine-type endopeptidase inhibitor activity;extracellular region	Prot_inh_BBI
GRMZM2G147241	3793.92	141.28	0.4166	0.0725	0.1085	2.9017	0.506	35.9243	4.7665	1.7563	hypothetical protein LOC100275232 (LOC100275232), mRNA	NA	NA	DUF640
GRMZM2G088795	220.12	0	0	0	0	0	0	1.4452	0.1723	1.5313	NA	NA	oxidoreductase activity	Oxoglutarate/Fe-dep_oxygenase
GRMZM2G496991	803.48	13.42	0	0	0	0	1.6331	7.0641	7.1376	11.3192	NA	NA	NA	DUF581
GRMZM2G087827	1402.3	31.96	0.3423	0	0.037	0.1411	0.0151	3.1737	2.9771	10.6787	esterase (LOC100281373), mRNA	esterase	lipid metabolic process;hydrolase activity, acting on ester bonds	Lipase_GDSL; Esterase_SGNH_hydro-type
GRMZM2G121115	7101.76	211.36	0.6744	0.0633	0.0853	2.4381	1.036	34.0857	34.0554	40.7584	protein binding protein (LOC100280827), mRNA	protein binding protein	transcription cofactor activity;histone acetyltransferase activity;protein binding;nucleus;regulation of transcription, DNA-dependent;zinc ion binding;transcription cofactor activity;histone acetyltransferase activity;protein binding;nucleus;regulation of transcription, DNA-dependent;zinc ion binding;transcription cofactor activity;histone acetyltransferase activity;protein binding;nucleus;regula…	BTB_POZ; BTB/POZ_fold; Znf_TAZ; BTB/POZ-like
GRMZM2G111112	134.44	0	0	0	0	0	0	0.0869	0.2024	1.6059	hypothetical protein LOC100274720 (LOC100274720), mRNA	hypothetical protein LOC100274720	NA	NA
GRMZM5G833406	45811.9	1769.02	13.8567	0.2044	0.0724	0.9335	1.2585	32.7861	118.874	279.445	IAA-amino acid hydrolase ILR1-like 4 (LOC100285766), mRNA	IAA-amino acid hydrolase ILR1-like 4	lysosphingolipid and lysophosphatidic acid receptor activity;protein binding;G-protein coupled receptor protein signaling pathway;metabolic process;integral to membrane;hydrolase activity;lysosphingolipid and lysophosphatidic acid receptor activity;protein binding;G-protein coupled receptor protein signaling pathway;metabolic process;integral to membrane;hydrolase activity	Pept_M20D_AA028/carboxypep-Ss1; Peptidase_M20; Peptidase_M20_dimer; EDG8_S1P_rcpt; Pept_M20D_amidohydro
GRMZM2G056388	9106.44	416.96	2.548	1.5981	0.9953	1.3431	1.285	32.2067	22.8872	37.5514	NA	NA	glutathione transferase activity;cytoplasm;metabolic process	Glutathione_S-Trfase_N; GST_C; Glutathione-S-Trfase_C-like; Thioredoxin-like_fold; GST_omega
GRMZM2G400918	856.4	0	0	0	0	0	0	8.8692	1.7221	10.4337	NA	NA	NA	NA
GRMZM2G475884	385.72	13	0.1	0.0777	0.0464	0.3339	0.1295	1.2036	0.9139	2.1082	NA	NA	metabolic process;nitrogen fixation;nitrogenase activity;transferase activity, transferring hexosyl groups	UDP_glucos_trans; Nase_comp1_CS
GRMZM2G047762	164.3	2	0	0	0	0	0.082	1.8616	1.1832	0.0761	NA	NA	zinc ion transmembrane transporter activity;zinc ion transport;dicarboxylic acid transport;membrane;integral to membrane;sodium:dicarboxylate symporter activity;metal ion transport;metal ion transmembrane transporter activity;transmembrane transport	ZIP; Na-dicarboxylate_symporter; Zn/Fe_permease_fun/pln
GRMZM2G414252	206.74	9	0.1067	0.0743	0.077	0	0.0148	0.4966	1.0523	1.0476	hypothetical protein LOC100217048 (LOC100217048), mRNA	hypothetical protein LOC100217048	nucleus;transcription regulator activity;regulation of transcription	HLH_DNA-bd_dom; HLH_DNA-bd
GRMZM2G141320	2604.66	53	0.3163	0.0578	0	0.2236	0.4361	5.4191	17.2144	6.8536	hypothetical protein LOC100383973 (LOC100383973), mRNA	hypothetical protein LOC100383973	glycolipid biosynthetic process;oxidoreductase activity;transferase activity, transferring hexosyl groups;oxidation reduction	MGDG_synth; NADH-Cyt_B5_reductase
GRMZM2G146665	650.12	15	0.0644	0.0588	0.0804	0	0	3.895	0.9628	0.306	NA	NA	NA	BURP
GRMZM2G119823	11629.7	349.26	2.6373	0.1418	0.1695	0.1145	1.373	31.1184	54.381	73.6314	DNA binding like (LOC100281107), mRNA	DNA binding like	nucleus;transcription regulator activity;regulation of transcription;nucleus;transcription regulator activity;regulation of transcription	HLH_DNA-bd_dom; HLH_DNA-bd
GRMZM2G119705	11795.7	524	12.1459	1.2462	0.5067	0.3912	1.0016	1.1732	20.8257	95.2537	ribosome-inactivating protein (RIP), mRNA;hypothetical protein LOC100192066 (LOC100192066), mRNA	hypothetical protein LOC100192066;ribosome-inactivating protein	neuropeptide Y receptor activity;G-protein coupled receptor protein signaling pathway;integral to membrane;negative regulation of translation;rRNA N-glycosylase activity	Ribosome_inactivat_prot; Ribosome_inactivat_prot_subgr; NPY2_rcpt
GRMZM2G450866	564.1	7.9	0.6791	0	0	0.1439	0	0.1562	1.1665	14.6712	NA	NA	NA	NA
GRMZM2G024705	1838.2	25.72	0.8179	0	0.183	0.8153	1.3488	9.4594	24.7128	5.9177	NA	NA	NA	SPX_N
GRMZM2G133867	341	0	0	0	0	0	0	6.5713	1.5917	11.7597	NA	NA	NA	NA
GRMZM2G083292	381.86	19	0	0.14	0.088	0.3035	0.1763	3.1845	1.4052	1.9889	NA	NA	chitinase activity;carbohydrate metabolic process;chitin catabolic process;cell wall macromolecule catabolic process	Glyco_hydro_19; Glyco_hydro_19_cat
GRMZM2G023325	867.72	9	0.169	0.0825	0.0637	0	0.126	2.8687	1.4021	9.731	NA	NA	methyltransferase activity;O-methyltransferase activity;protein dimerization activity	Plant_MeTrfase_dimerisation; O_MeTrfase_2
GRMZM2G075461	722.9	5	0	0.0328	0.0564	0	0	2.229	1.149	4.4498	hypothetical protein LOC100279819 (LOC100279819), mRNA	hypothetical protein LOC100279819	monooxygenase activity;iron ion binding;electron carrier activity;heme binding;oxidation reduction	Cyt_P450; Cyt_P450_CS; Cyt_P450_E_grp-I; Cyt_P450_E_grp-II; Cyt_P450_E_grp-IV; Cyt_P450_B
GRMZM2G004955	3261.48	33.04	0.2493	0.0703	0.1372	0.8847	0.1556	20.9376	7.8158	9.4893	NA	NA	extracellular region	Barwin-related_endoglucanase; Expan_Lol_pI_C; Expan_Lol_pI
GRMZM2G058149	2467.64	53	0.0798	0	0	0	0.2952	6.3359	4.8319	12.1803	hypothetical protein LOC100279482 (LOC100279482), mRNA	hypothetical protein LOC100279482	triglyceride lipase activity;lipid metabolic process	Lipase_3
GRMZM2G027187	1353.66	34.1	0	0.1393	0.0949	0	0.2255	6.5178	2.929	2.4841	hypothetical protein LOC100381554 (LOC100381554), mRNA	hypothetical protein LOC100381554	NA	Microtubule-assoc_MAP65_ASE1; AIP3
GRMZM2G075828	110223	4830.34	18.7545	5.5967	5.8109	16.3282	20.8855	286.557	204.835	447.086	transparent testa 12 protein (LOC100281401), mRNA	transparent testa 12 protein	drug transmembrane transport;drug transmembrane transporter activity;antiporter activity;membrane;transmembrane transport;drug transmembrane transport;drug transmembrane transporter activity;antiporter activity;membrane;transmembrane transport	MatE
GRMZM2G058404	4755.18	22	0.0939	0.0595	0	0.0667	0.0177	34.5456	13.1324	34.365	NA	NA	isoprenoid biosynthetic process	Polyprenyl_synt; Terpenoid_synth
GRMZM2G075438	395.28	18.22	0.1384	0.0361	0.1044	0	0	0.4509	0.7005	1.3043	receptor-like protein kinase RK20-1 (LOC100286383), mRNA	receptor-like protein kinase RK20-1	protein kinase activity;protein serine/threonine kinase activity;ATP binding;transcription initiation;regulation of transcription, DNA-dependent;protein amino acid phosphorylation;zinc ion binding;transcription regulator activity	DUF26; Se/Thr_prot_kinase-like_dom; Ser-Thr/Tyr-Pkinase; Kinase-like_dom; Tyr_Pkinase_cat_dom; Ser/Thr_prot_kinase_dom; Protein_kinase_ATP_BS; Ser/Thr_prot_kinase_AS; TFIIB-related
GRMZM2G434514	474.82	19	0	0.5983	0.1946	0	0	5.2973	2.5772	4.6093	NA	NA	cell wall macromolecule catabolic process	Peptidoglycan-bd_lysin; Peptidoglycan-bd_Lysin_sg
GRMZM2G371793	5881.28	133.94	2.1016	0.0964	0.0849	2.1524	3.101	28.4205	52.5209	78.299	NA	NA	acid phosphatase activity	Acid_phosphat_B
GRMZM2G049538	819.32	0	0	0	0	0	0	0.6656	0.583	4.2775	terpene synthase1 (tps1), mRNA	terpene synthase1	magnesium ion binding;metabolic process;lyase activity;magnesium ion binding;metabolic process;lyase activity	Terp_synth-like; Terpene_synthase_metal-bd; Terpenoid_cyclase/PrenylTrfase; Terpenoid_synth
GRMZM2G389557	1740.46	57.7	0.3058	0.0221	0.0106	0	0.1086	0.4385	1.6804	1.8325	NA	NA	DNA binding;type I hypersensitivity;regulation of transcription	NAM; POA_allergen_C
GRMZM2G099678	30272.6	212.16	2.989	0	0	0.4769	0.1497	56.2296	74.8939	174.052	LOC100282200 (pco073188), mRNA	LOC100282200	NA	Reg_chr_condens
GRMZM2G338160	147	7	0.1302	0	0.1363	0.0352	0	0.857	0.2087	1.3108	hypothetical protein LOC100276191 (LOC100276191), mRNA;hypothetical protein LOC100304130 (LOC100304130), mRNA;hypothetical protein LOC100304136 (LOC100304136), mRNA	hypothetical protein LOC100276191;hypothetical protein LOC100304136	NA	NA
GRMZM2G362823	1512.82	50.82	0.1856	0.1061	0.1097	0	0.7897	29.1273	11.5773	18.2702	NA	NA	NA	NA
GRMZM2G472671	189	1	0	0.0826	0	0	0.1028	0.0741	0.2845	2.1912	hypothetical protein LOC100273284 (LOC100273284), mRNA	hypothetical protein LOC100273284	nucleus;type I hypersensitivity;transcription regulator activity;regulation of transcription	HLH_DNA-bd_dom; HLH_DNA-bd; POA_allergen_C
GRMZM2G565911	1026	16	0.0919	0.0498	0.0197	0	0.0796	0.1126	0.2835	4.8124	NA	NA	NA	VWF_A
GRMZM2G336437	376.98	4	0	0.0706	0	0	0.1737	1.2828	1.2206	3.0832	lactoylglutathione lyase (LOC100281749), mRNA	lactoylglutathione lyase	NA	Glyas_bleo-R_dOase
GRMZM2G000326	633.42	10	0.8718	0	0.1252	0	0	0	1.7513	12.3192	subtilisin-chymotrypsin inhibitor CI-1B (LOC100280933), mRNA	subtilisin-chymotrypsin inhibitor CI-1B;subtilisin-chymotrypsin inhibitor CI-1B	serine-type endopeptidase inhibitor activity;response to wounding;serine-type endopeptidase inhibitor activity;response to wounding	Prot_inh_pot1
GRMZM5G836174	33100.3	1310.5	10.411	0.9349	0.9384	4.8584	5.5876	100.402	328.821	112.435	hypothetical protein LOC100191227 (LOC100191227), mRNA	hypothetical protein LOC100191227	phosphatase activity;metabolic process;phosphatase activity	PyrdxlP_Pase-rel; PyrdxlP_Pase_PHOSPHO2; HAD-SF_hydro_IB_PSP-like
GRMZM2G094017	3408.16	139	0.3071	0.2646	0.4442	0.1099	0.613	6.8976	6.7237	16.2148	NA	NA	transferase activity, transferring acyl groups other than amino-acyl groups	Transferase
GRMZM2G070475	832.56	37.96	0.0501	0.0608	0.1132	0.2344	0.2607	1.7903	1.7115	8.2193	NA	NA	heat shock protein binding	DnaJ_N; Heat_shock_DnaJ_CS
GRMZM2G470882	9519.26	323.78	6.951	0.903	0.7144	3.2561	3.6388	6.7879	20.3785	88.0896	hypothetical protein LOC100272664 (LOC100272664), mRNA	hypothetical protein LOC100272664	NA	NA
GRMZM2G096407	2061.92	47.9	0	0.1121	0.0722	0.3521	0.6708	4.6361	7.6586	8.4467	hypothetical protein LOC100383984 (LOC100383984), mRNA	hypothetical protein LOC100383984	NA	NA
GRMZM2G465165	337.06	9.6	0.0139	0	0.0389	0.0967	0	0.2082	0.3093	1.8047	NA	NA	protein kinase activity;protein serine/threonine kinase activity;binding;ATP binding;protein amino acid phosphorylation	Lectin_legB; Se/Thr_prot_kinase-like_dom; Ser-Thr/Tyr-Pkinase; Kinase-like_dom; ConA-like_lec_gl; Tyr_Pkinase_cat_dom; Ser/Thr_prot_kinase_dom; Protein_kinase_ATP_BS; Ser/Thr_prot_kinase_AS; Lectin_legB_Mn/Ca_BS
GRMZM2G334740	199.26	8.02	0.144	0	0.156	0.1202	0.0283	1.1159	0.9289	1.6189	hypothetical protein LOC100278548 (LOC100278548), mRNA	hypothetical protein LOC100278548	NA	NA
GRMZM2G109252	22715.5	224.24	0.879	0.1174	0.139	0.5945	0.7293	5.1318	25.8712	129.776	hypothetical protein LOC100383907 (LOC100383907), mRNA	hypothetical protein LOC100383907	NA	START_lipid-bd
aEar-enriched genes
	btotal reads		csamples								dannotation
gene.id	tassel.reads	ear.reads	ear.tip	ear.mid	ear.base	ear.1mm	ear.2mm	tas.1-2mm	tas.3-4mm	tas.5-7mm	Refseq_dna	Entrez	GO	InterPro
AC233950.1_FG002	506.5	15638.2	45.5487	56.2292	46.5983	56.3277	78.0851	0.4406	1.6113	2.4505	NA	NA	NA	Transcription_factor_TCP
GRMZM2G051943	55.2	3002.86	35.7262	10.0662	2.8607	0.0242	0	0.176	0.0641	0.5647	endochitinase A (LOC100283098), mRNA;endochitinase A (LOC100303798), mRNA	endochitinase A;endochitinase A	chitinase activity;somatostatin receptor activity;carbohydrate metabolic process;chitin catabolic process;G-protein coupled receptor protein signaling pathway;chitin binding;integral to membrane;cell wall macromolecule catabolic process	Glyco_hydro_19; Chitin-bd_1; Glyco_hydro_19_cat; Somatstn_rcpt_1; Chitin-binding_1_CS
GRMZM2G163574	1	310.96	0	0	0.0214	0.9508	0.471	0.0096	0	0	NA	NA	motor activity;flagellum assembly;bacterial-type flagellum hook	Flag_hook
AC217051.3_FG006	37.22	2014.64	26.7601	7.1134	1.3902	34.7803	65.1147	0.2963	0.4568	0.1001	ZCN5 protein (ZCN5), mRNA	ZCN5 protein	NA	PtdEtn-bd_prot_PEBP; Phosphotidylethanolamine-bd_CS
GRMZM2G169240	2	112	0.6442	0.4874	0.3737	0	0	0.0373	0.0161	0	NA	NA	lipid metabolic process;oxidoreductase activity;oxidation reduction;lipid metabolic process;oxidoreductase activity;oxidation reduction	Fatty_acid_desaturase-1
GRMZM2G076946	0.26	137.92	0	0.8648	1.5873	0	0	0	0.0559	0	dhurrinase-like B-glucosidase (LOC100174972), mRNA	dhurrinase-like B-glucosidase	hydrolase activity, hydrolyzing O-glycosyl compounds;carbohydrate metabolic process;hydrolase activity, hydrolyzing O-glycosyl compounds;carbohydrate metabolic process	Glyco_hydro_1; Glyco_hydro_catalytic_core; Glyco_hydro_1_AS
AC207454.3_FG004	0	339.52	0	0	0	4.8721	7.0416	0	0	0	NA	NA	NA	NA
GRMZM2G178894	3	331.98	0.0395	1.8036	3.4486	0	0	0.0375	0	0.1033	NA	NA	intracellular;zinc ion binding;type I hypersensitivity	Znf_C2H2; POA_allergen_C
GRMZM2G156794	0	190.12	0	0	0	0.7367	2.8288	0	0	0	hypothetical protein LOC100272370 (LOC100272370), mRNA	hypothetical protein LOC100272370	transporter activity;oligopeptide transport;membrane	Oligopeptide_transporter; MFS_general_subst_transpt
GRMZM2G023847	1	165.98	5.3432	0.3746	0.5459	0	0	0	0	0.0684	hypothetical protein LOC100191824 (LOC100191824), mRNA	hypothetical protein LOC100191824	copper ion binding;electron carrier activity	Plcyanin-like; Cupredoxin; MTG8
GRMZM2G412073	4	358.48	0	1.5417	8.1377	0	0	0.0253	0	0.0362	hypothetical protein LOC100280042 (LOC100280042), mRNA	hypothetical protein LOC100280042	NA	NA
GRMZM2G407279	1	337.64	0	0	0.0227	1.2678	0.6643	0.0096	0	0	NA	NA	motor activity;flagellum assembly;bacterial-type flagellum hook	Flag_hook
GRMZM2G328904	11	274.3	0	0	0.055	23.32	6.8368	0.0927	0.1283	0.068	NA	NA	NA	NA
GRMZM2G358153	0	136	2.3052	0.4188	0.1826	0	0	0	0	0	hypothetical protein LOC100192522 (LOC100192522), mRNA	hypothetical protein LOC100192522	hydrolase activity, hydrolyzing O-glycosyl compounds;chitinase activity;carbohydrate metabolic process;chitin catabolic process	Glyco_hydro18cat; Glyco_hydro_catalytic_core; Chitinase_II; Glyco_hydro_18_chit_AS; 2S_globulin
GRMZM2G392554	0.16	150.34	0	0	0	2.6294	2.3428	0	0	0	NA	NA	NA	NA
GRMZM2G138727	10	355	2.8609	0.0521	0	0	0.0225	0.0787	0.0933	0.0293	opaque2 modifier (LOC542296), mRNA;hypothetical protein LOC100279023 (LOC100279023), mRNA	opaque2 modifier	nutrient reservoir activity;actin binding;calmodulin binding;muscle contraction;myosin binding	Caldesmon
GRMZM2G145461	2	160	2.9939	1.3714	0.2201	0	0	0	0	0.0402	acidic class I chitinase (uiu5(chn)), mRNA;hypothetical protein LOC100274400 (LOC100274400), mRNA	hypothetical protein LOC100274400	chitinase activity;chitin catabolic process;chitin binding;cell wall macromolecule catabolic process	Chitin-bd_1; Glyco_hydro_19_cat; Chitin-binding_1_CS
GRMZM2G163283	0	118.22	0	0	0	0.3485	6.8152	0	0	0	hypothetical protein LOC100276192 (LOC100276192), mRNA;hypothetical protein LOC100278998 (LOC100278998), mRNA	hypothetical protein LOC100276192;hypothetical protein LOC100278998	NA	DUF538
GRMZM2G051921	0	126.36	3.2173	0.4098	0	0	0	0	0	0	hypothetical protein LOC100384000 (LOC100384000), mRNA	hypothetical protein LOC100384000	chitinase activity;carbohydrate metabolic process;chitin catabolic process;chitin binding;cell wall macromolecule catabolic process	Glyco_hydro_19; Chitin-bd_1; Glyco_hydro_19_cat; Chitin-binding_1_CS
GRMZM2G026143	0	176.82	18.3676	2.418	1.2069	0	0	0	0	0	NA	NA	NA	NA
GRMZM2G160687	19	479.7	0.0986	0.6419	10.3308	0.0562	0.1889	0	0.1176	0.1328	Zea AGAMOUS homolog2 (zag2), mRNA;LOC542326 (ov23), mRNA	Zea AGAMOUS homolog2;Zea AGAMOUS homolog2;Zea AGAMOUS homolog2	transcription factor activity;nucleus;regulation of transcription, DNA-dependent;sequence-specific DNA binding;transcription factor activity;nucleus;regulation of transcription, DNA-dependent;sequence-specific DNA binding;transcription factor activity;nucleus;regulation of transcription, DNA-dependent;sequence-specific DNA binding;transcription factor activity;nucleus;regulation of transcription,…	TF_Kbox
GRMZM2G124207	3	184.82	0.0501	0.1416	0.2087	1.9812	1.9058	0.0302	0.0465	0	NA	NA	NA	NA
GRMZM2G134496	0	342.42	0	0	0	2.441	7.2062	0	0	0	NA	NA	tetracycline:hydrogen antiporter activity;tetracycline transport;integral to membrane;response to antibiotic;transmembrane transport	MFS_1; MFS_general_subst_transpt; Tet-R_TetA
GRMZM2G010494	22.92	723.34	1.7558	2.8371	2.653	0.9915	2.556	0.0217	0.0167	0.1014	NA	NA	catalytic activity;transketolase activity;metabolic process	Transketolase_N; Transketolase-like_Pyr-bd; Transketolase_C; Transketo_C/Pyr-ferredox_oxred; Transketolase_bac-like
GRMZM2G056022	0	203.94	0	0.0522	0	2.0681	5.429	0	0	0	NA	NA	NA	NA
GRMZM2G465999	13.04	311.44	0.8324	0.8962	1.4166	0.1176	0.5438	0.0636	0.0411	0.0518	NA	NA	protein kinase activity;protein serine/threonine kinase activity;ATP binding;sugar binding;protein amino acid phosphorylation;recognition of pollen;protein kinase activity;protein serine/threonine kinase activity;ATP binding;protein amino acid phosphorylation	Se/Thr_prot_kinase-like_dom; Ser-Thr/Tyr-Pkinase; Kinase-like_dom; Tyr_Pkinase_cat_dom; Ser/Thr_prot_kinase_dom; Protein_kinase_ATP_BS; Ser/Thr_prot_kinase_AS
GRMZM2G127087	0	126.94	0.454	0.794	0.8497	0	0	0	0	0	terpene synthase 6 (TPS6), mRNA;sesquiterpene cyclase-like (Umi3), mRNA	sesquiterpene cyclase-like;terpene synthase 6	magnesium ion binding;metabolic process;lyase activity;magnesium ion binding;metabolic process;lyase activity;magnesium ion binding;metabolic process;lyase activity	Terp_synth-like; Terpene_synthase_metal-bd; Terpenoid_synth; Terpenoid_cyclase/PrenylTrfase
GRMZM2G103342	11	276.56	3.3973	0.4327	0.5588	0	0	0.1502	0.0294	0.0333	LOC100192761 (TIDP3705), mRNA	LOC100192761	peroxidase activity;response to oxidative stress;heme binding;oxidation reduction	Haem_peroxidase_pln/fun/bac; Haem_peroxidase; Peroxidase_pln; Peroxidases_heam-ligand_BS; Peroxidases_AS
GRMZM2G117971	31.62	1029.76	32.4852	3.5585	2.3925	0	0	0.074	0	0.395	LOC100191593 (pco080661a), mRNA	LOC100191593	defense response to bacterium;defense response to fungus	Barwin; Barwin-related_endoglucanase; Barwin_CS
GRMZM2G563728	5.66	170.86	0.758	1.7826	3.6132	0.2945	0.111	0	0	0.076	NA	NA	actin binding;actin cytoskeleton;actin cytoskeleton organization	Formin
GRMZM2G402631	0	201	1.7309	0.749	0.4855	0	0	0	0	0	pathogenesis related protein-5 (PR-5), mRNA	pathogenesis related protein-5	NA	Thaumatin
GRMZM2G136663	14.2	2060.3	0.6802	0.1982	0.0483	7.034	23.2855	0.2085	0.107	0	hypothetical protein LOC100275127 (LOC100275127), mRNA;hypothetical protein LOC100275185 (LOC100275185), mRNA	hypothetical protein LOC100275127;hypothetical protein LOC100275185	NA	NA
