# Supplementary material for: Regulatory modules controlling maize inflorescence architecture
Source: HighWire-hosted journal article supplement (doi:10.1101/gr.166397.113), 2013-12-04
Supplement: Supp_Table6.xlsx [file Supp_Table6.xlsx]

## Sheet: Table_S6
Supplemental Table 6. Dynamically expressed genes grouped by primary co-expression cluster across 8 wild-type inflorescence stages.
a 16,272 dynamically expressed genes clustered using mfuzz across wild-type libraries. b Gene names and abbreviations for maize genes that have been previously characterized (e.g. classical maize genes). c FPKM from Cuffdiff analysis used for clustering. d p < 0.05; FDR 10%. e Functional annotations, if available, extracted from Refseq DNA, EntrezGene, Gene Ontology and InterPro databases. f Root…
				fpkmc								DE genesd			annotationse
clustera	maize.gene.id	classical.maize.geneb		wt.1mm.fpkm	wt.2mm.fpkm	tip.IM/SPM.ear.fpkm	mid.SM.ear.fpkm	base.FM.ear.fpkm	stg1.tassel.fpkm	stg2.tassel.fpkm	stg3.tassel.fpkm	DE.ra1.1mm	DE.ra2.1mm	DE.ra3.1mm	RefSeq DNA	EntrezGene	GO	InterPro	Root taxonf
1	AC233865.1_FG006			16.6167	18.9829	21.8211	12.6011	12.7309	9.7932	6.0775	7.0946	no	no	no	NA	NA	intracellular;zinc ion binding	Znf_RanBP2	Eukaryota
1	GRMZM2G109618			3.5937	3.8214	6.1798	1.2436	1.048	2.2995	1.2021	0.7202	no	no	no	hypothetical protein LOC100273470 (LOC100273470), mRNA	hypothetical protein LOC100273470;hypothetical protein LOC100273470	nucleotide binding;DNA binding;single-stranded DNA binding;DNA-directed RNA polymerase activity;ATP binding;nucleus;DNA repair;transcription;reciprocal meiotic recombination;DNA-dependent ATPase activity;nucleoside-triphosphatase activity;nucleotide binding;DNA binding;single-stranded DNA binding;DNA-directed RNA polymerase activity;ATP binding;nucleus;DNA repair;transcription;reciprocal meiotic …	DNA_recomb/repair_Rad51_C; DNA_repair_Rad51/TF_NusA_a-hlx; ATPase_AAA+_core; DNA_recomb/repair_RecA-like; DNA_recomb/repair_RecA; DMC1_rcmbase	Eukaryota
1	GRMZM2G142207			2.4862	3.4475	3.3428	1.9676	1.6534	3.2107	0.9568	2.1411	no	no	no	NA	NA	protein kinase activity;protein serine/threonine kinase activity;endopeptidase inhibitor activity;ATP binding;sugar binding;protein amino acid phosphorylation	B_lectin_man-bd; Se/Thr_prot_kinase-like_dom; Ser-Thr/Tyr-Pkinase; Kinase-like_dom; Protease_inh_b-brl_dom; Pan_app; Tyr_Pkinase_cat_dom; Ser/Thr_prot_kinase_dom; Ser/Thr_prot_kinase_AS	Tracheophyta
1	GRMZM2G123831			37.3829	47.7292	47.4748	24.6018	26.4435	38.0419	27.2051	27.5778	no	no	yes	NA	NA	NA	NA	Magnoliophyta
1	GRMZM2G057000	dwf1	DWF1 like1	390.181	502.059	457.569	217.066	196.268	362.463	248.015	384.543	no	no	no	brassinosteroid biosynthesis-like protein (DWF1), mRNA;gibberellin-regulated protein 1 (LOC100286372), mRNA;brassinosteroid biosynthesis-like protein (DWF1), mRNA	brassinosteroid biosynthesis-like protein;brassinosteroid biosynthesis-like protein;brassinosteroid biosynthesis-like protein	catalytic activity;oxidoreductase activity;FAD binding;catalytic activity;oxidoreductase activity;FAD binding;catalytic activity;oxidoreductase activity;FAD binding;catalytic activity;oxidoreductase activity;FAD binding;catalytic activity;oxidoreductase activity;FAD binding	Oxid_FAD_bind_N; FAD-bd_2	Eukaryota
1	GRMZM2G351672			4.1003	3.5799	4.7707	2.6467	2.2934	2.599	0.9759	2.2807	no	no	no	NA	NA	NA	NA	Eukaryota
1	GRMZM2G115424			39.2083	46.4764	65.5679	42.3969	39.853	24.6898	22.1691	19.1407	no	no	no	PHD finger protein (LOC100283897), mRNA	PHD finger protein	voltage-gated potassium channel activity;protein binding;potassium ion transport;voltage-gated potassium channel complex;zinc ion binding;voltage-gated potassium channel activity;protein binding;potassium ion transport;voltage-gated potassium channel complex;zinc ion binding;voltage-gated potassium channel activity;protein binding;potassium ion transport;voltage-gated potassium channel complex;zi…	Znf_PHD-finger; Znf_FYVE_PHD; Znf_PHD; Zinc_finger_PHD-type_CS; K_chnl_volt-dep_Kv1.5	Viridiplantae
1	AC191009.3_FG004			3.0592	10.9084	9.4303	3.969	6.314	6.4761	3.5416	2.2152	no	no	no	NA	NA	NA	NA	Embryophyta
1	GRMZM5G807217			46.9828	63.3492	55.2384	26.5756	30.6103	39.1817	27.166	32.8116	no	no	no	NA	NA	cytoplasm;intracellular protein transport;protein transporter activity;membrane	Uso1_p115_C	Eukaryota
1	GRMZM2G104481			75.0655	95.6795	148.372	59.8104	54.9344	53.2532	34.71	45.4099	no	no	no	hypothetical protein LOC100273471 (LOC100273471), mRNA	hypothetical protein LOC100273471	nucleic acid binding;RNA binding;nucleic acid binding;RNA binding;nucleic acid binding;RNA binding;nucleic acid binding;RNA binding	RRM_RNP1; Hud_Sxl_RNA	Eukaryota
1	GRMZM2G477609			20.9852	38.6321	55.0348	19.5733	21.6431	19.6678	17.3925	13.0892	no	no	no	hypothetical protein LOC100384661 (LOC100384661), mRNA	NA	NA	NA	Magnoliophyta
1	GRMZM5G832805			7.4616	9.5599	8.3538	5.2624	6.7337	5.2361	6.8938	5.0974	yes	no	yes	hypothetical protein LOC100279554 (LOC100279554), mRNA	NA	metabolic process;transferase activity, transferring hexosyl groups	UDP_glucos_trans	Magnoliophyta
1	GRMZM2G026952			17.2091	23.557	29.5016	15.8596	18.495	14.8954	9.3757	11.2346	no	no	no	hypothetical protein LOC100272823 (LOC100272823), mRNA	hypothetical protein LOC100272823	nucleic acid binding;intracellular;zinc ion binding	Znf_U1; Znf_C2H2-like; Znf_C2H2	Magnoliophyta
1	GRMZM2G046037			2.404	2.1602	2.1018	1.3231	1.2961	1.1775	1.1467	0.645	no	no	no	NA	NA	NA	NA	Poaceae
1	GRMZM2G025703			5.8262	7.4878	11.2773	5.0191	4.4391	6.3734	4.9061	3.8103	no	no	no	hypothetical protein LOC100381720 (LOC100381720), mRNA	NA	protein binding;zinc ion binding;protein binding;zinc ion binding	Znf_PHD-finger; Znf_FYVE_PHD; Znf_PHD; Znf_RING; Zinc_finger_PHD-type_CS	Eukaryota
1	GRMZM2G124317			1053.64	1320.26	1555.02	796.624	852.327	1197.18	853.271	623.34	no	no	no	hypothetical protein LOC100193571 (LOC100193571), mRNA	hypothetical protein LOC100193571;hypothetical protein LOC100193571;hypothetical protein LOC100193571;hypothetical protein LOC100193571;hypothetical protein LOC100193571	histamine receptor activity;G-protein coupled receptor protein signaling pathway;integral to membrane	NA	NA
1	GRMZM2G310144			1.9259	1.9418	1.6287	1.3879	1.3258	0.778	0.5211	1.0416	no	no	no	NA	NA	nucleotide binding;ATP binding;ATPase activity;nucleoside-triphosphatase activity	ABC_transporter-like; ATPase_AAA+_core; ABC_transporter_CS	Eukaryota
1	GRMZM2G157102			1.3352	1.8079	1.5812	0.617	0.9896	0.8447	0.7654	0.8465	no	no	no	NA	NA	phosphopantetheine binding	BT1; MFS_general_subst_transpt; PPantetheine_attach_site	Eukaryota
1	GRMZM2G115000			31.5783	36.8073	51.1554	28.2558	30.6455	28.0719	21.5088	32.1974	no	no	no	NA	NA	ubiquitin ligase complex;ubiquitin-protein ligase activity;binding;protein ubiquitination;ubiquitin ligase complex;ubiquitin-protein ligase activity;binding;protein ubiquitination;ubiquitin ligase complex;ubiquitin-protein ligase activity;binding;protein ubiquitination;ubiquitin ligase complex;ubiquitin-protein ligase activity;binding;protein ubiquitination	Ubox_domain; ARM-type_fold; Armadillo	Embryophyta
1	GRMZM2G329484			9.0143	10.5757	10.5937	5.4616	5.7365	6.6643	5.4594	5.0317	no	no	no	NA	NA	dopamine receptor activity;G-protein coupled receptor protein signaling pathway;integral to membrane;type I hypersensitivity	Dopa_D4_rcpt; POA_allergen_C	Poaceae
1	GRMZM2G055999			324.845	484.723	591.773	174.41	176.286	159.709	131	107.25	no	no	no	LOC100278376 (cl13428_1), mRNA	LOC100278376	metal ion transport;homoiothermy;metal ion binding;ice binding;response to freezing	HeavyMe_transpt; Antifreeze_1	Magnoliophyta
1	GRMZM2G395721			1.5502	1.361	2.2508	1.0358	0.9881	1.3714	0.8006	0.8672	no	no	no	NA	NA	DNA binding;ligand-dependent nuclear receptor activity;nucleus;regulation of transcription, DNA-dependent	NOR1_rcpt	Zea mays
1	GRMZM2G004988			45.9564	69.6994	61.1472	40.8986	36.1078	42.1239	28.0565	29.7177	no	no	no	GRF-interacting factor 3-like (GIF3), mRNA;SSXT protein (LOC100282896), mRNA	SSXT protein	NA	SSXT	Eukaryota
1	GRMZM2G143608			2.3925	2.3965	2.1822	1.2355	1.274	0.9518	0.5117	1.1114	no	no	no	NA	NA	NA	NA	Magnoliophyta
1	GRMZM2G050982			57.9361	66.2199	83.7266	39.1199	43.3619	33.3265	24.065	26.1209	no	no	no	hypothetical protein LOC100276330 (LOC100276330), mRNA	hypothetical protein LOC100276330	nucleic acid binding	DNA/RNA-bd_Alba-like; AT_hook-like	Eukaryota
1	GRMZM2G038536			15.4923	17.3877	14.5737	8.9744	9.2456	8.5443	5.8812	6.4237	no	no	no	NA	NA	NAD+ ADP-ribosyltransferase activity;intracellular;nucleus;protein amino acid ADP-ribosylation	PADR1; BRCT; WGR; Poly(ADP-ribose)pol_cat_dom; Poly(ADP-ribose)pol_reg_dom	Eukaryota
1	GRMZM5G823162			4.7652	3.5575	7.4833	2.5801	2.7219	3.5037	2.6426	2.5383	no	no	yes	hypothetical protein LOC100384286 (LOC100384286), mRNA	hypothetical protein LOC100384286	NA	NA	NA
1	GRMZM5G803565			14.7815	16.9327	22.6642	13.7671	16.2434	11.1987	9.3263	13.5079	no	no	no	hypothetical protein LOC100274598 (LOC100274598), mRNA	hypothetical protein LOC100274598	NA	DUF1421	Embryophyta
1	GRMZM2G177510			5.3767	4.6088	8.4952	0.2793	0	2.5726	1.5485	0.8844	no	no	yes	hypothetical protein LOC100381888 (LOC100381888), mRNA	hypothetical protein LOC100381888	cysteine-type endopeptidase activity;hydrolase activity, hydrolyzing O-glycosyl compounds;carbohydrate metabolic process;proteolysis	NA	Embryophyta
1	GRMZM2G420823			117.596	108.192	141.77	82.583	85.659	73.501	54.3455	52.5902	no	no	no	NA	NA	transporter activity;transport;membrane;transmembrane transport;transporter activity;transport;membrane;transmembrane transport;transporter activity;transport;membrane;transmembrane transport;transporter activity;transport;membrane;transmembrane transport	Xant/urac/vitC	Eukaryota
1	GRMZM2G462046			2.2054	3.2471	4.4492	1.5847	0.6374	1.3986	1.3029	1.8612	no	no	no	NA	NA	NA	NA	NA
1	AC235534.1_FG007	ocl2	outer cell layer2	10.1544	12.4491	24.1565	4.9962	2.8567	11.3878	5.5602	5.9874	no	no	no	NA	NA	transcription factor activity;nucleus;regulation of transcription, DNA-dependent;transcription regulator activity;sequence-specific DNA binding	Homeobox; START_lipid-bd; Homeodomain-like; HTH_lambrepressr; Homeobox_CS	Embryophyta
1	GRMZM2G012841			65.2904	72.6642	79.8697	64.5317	67.6703	63.1446	46.6395	29.6635	no	no	yes	hypothetical protein LOC100193656 (LOC100193656), mRNA	hypothetical protein LOC100193656;hypothetical protein LOC100193656	NA	NA	Magnoliophyta
1	GRMZM2G144818			8.7091	10.8583	11.9083	5.8264	6.6473	7.0704	4.9878	6.4067	no	no	no	NA	NA	NA	NADH_Ub_cplx-1_asu_assmbl-fac3	Eukaryota
1	GRMZM2G000361			12.1825	17.0552	18.639	11.8018	13.1094	13.6634	14.0081	9.3184	no	no	no	EMB1417 (LOC100282749), mRNA	NA	NA	NA	Embryophyta
1	GRMZM2G016150	ohp1	opaque2 heterodimerizing protein1	21.9897	39.464	45.3898	25.0581	24.7646	34.9325	23.2895	24.3064	no	no	no	opaque2 heterodimerizing protein1 (ohp1), mRNA	opaque2 heterodimerizing protein1	transcription factor activity;nucleus;regulation of transcription, DNA-dependent;sequence-specific DNA binding;protein dimerization activity	bZIP_1; bZIP_2; TF_bZIP	Embryophyta
1	GRMZM2G027307			24.452	26.983	29.9202	21.071	26.4128	22.1465	13.6917	21.4782	no	no	no	hypothetical protein LOC100382953 (LOC100382953), mRNA	palmitoyltransferase ZDHHC20;hypothetical protein LOC100382953	receptor activity;multicellular organismal development;zinc ion binding;membrane	Znf_DHHC; Plexin-like_fold	Eukaryota
1	GRMZM2G133675			10.4671	14.5883	15.9918	9.0792	11.032	12.5923	11.5675	11.1717	no	no	no	LOC100272601 (pco136360), mRNA	LOC100272601	nucleus;transcription regulator activity;regulation of transcription;nucleus;transcription regulator activity;regulation of transcription	NA	Embryophyta
1	GRMZM2G470305			0.2741	0.3188	0.2754	0.1883	0.1514	0.0633	0.0632	0.0896	no	no	no	NA	NA	DNA binding;DNA-directed RNA polymerase activity;transcription	RNA_pol_asu; RNA_pol_N	Eukaryota
1	GRMZM2G386088			1.1226	2.2548	1.6255	1.0081	0.882	1.3158	0.7682	1.3493	no	no	no	NA	NA	NA	NA	Poaceae
1	GRMZM2G524711			38.0937	54.3874	46.4317	26.1649	29.7142	32.4388	25.4347	28.1441	no	no	no	hypothetical protein LOC100273621 (LOC100273621), mRNA	hypothetical protein LOC100273621	NA	NA	Viridiplantae
1	GRMZM2G399952			17.682	11.4543	14.5119	8.01	10.349	3.1043	2.5126	10.3082	yes	yes	yes	hypothetical protein LOC100274541 (LOC100274541), mRNA;hypothetical protein LOC100278330 (LOC100278330), mRNA;hypothetical protein LOC100274541 (LOC100274541), mRNA;hypothetical protein LOC100278330 (LOC100278330), mRNA	hypothetical protein LOC100274541;hypothetical protein LOC100274541	NA	Rhodanese-like	Embryophyta
1	GRMZM2G461447			63.965	44.2536	92.7683	43.7928	36.626	26.7389	20.4237	26.4307	yes	yes	yes	hypothetical protein LOC100384551 (LOC100384551), mRNA	hypothetical protein LOC100384551	ubiquitin ligase complex;ubiquitin-protein ligase activity;protein binding;zinc ion binding;protein ubiquitination;protein binding;zinc ion binding	Znf_C3HC4_RING-type; Znf_RING; Znf_RING_CS	Eukaryota
1	GRMZM2G332809			44.1749	42.3397	55.0441	33.4489	35.3752	19.8651	18.8723	31.3513	no	no	no	NA	NA	GTPase activity;structural molecule activity;GTP binding;microtubule;microtubule-based process;microtubule-based movement;protein complex;protein polymerization	Tubulin_FtsZ_GTPase; Tubulin/FtsZ_2-layer-sand-dom; SWIB_MDM2_domain; Tub_FtsZ_C; SWIB_domain; Tubulin_CS; Beta_tubulin; Tubulin	Eukaryota
1	GRMZM2G172183			10.0377	12.4718	12.5849	7.546	12.3241	11.835	8.4977	8.3836	no	no	no	hypothetical protein LOC100383860 (LOC100383860), mRNA	hypothetical protein LOC100383860	catalytic activity;ATP binding;ATP biosynthetic process;metabolic process;ATPase activity, coupled to transmembrane movement of ions, phosphorylative mechanism;membrane	Dehalogen-like_hydro; ATPase_P-typ_H-transp; ATPase_P-typ_ion-transptr	Eukaryota
1	GRMZM2G078826			80.9532	73.4403	104.008	70.9564	73.3569	46.7134	30.985	64.3783	no	no	no	hypothetical protein LOC100383248 (LOC100383248), mRNA	hypothetical protein LOC100383248;hypothetical protein LOC100383248	nucleic acid binding;helicase activity;protein binding;ATP binding;ATP-dependent helicase activity;nucleic acid binding;helicase activity;protein binding;ATP binding;ATP-dependent helicase activity	WW_Rsp5_WWP; DNA/RNA_helicase_DEAD/DEAH_N; DNA/RNA_helicase_C; DEAD-like_N; RNA-helicase_DEAD-box_CS	Eukaryota
1	GRMZM2G399067			1.2024	2.2455	1.8486	0.8744	1.3031	0.9778	0.997	0.8546	no	no	no	NA	NA	protein serine/threonine kinase activity;ATP binding;protein amino acid phosphorylation	Kinase-like_dom; Ser/Thr_prot_kinase_dom	Eukaryota
1	GRMZM2G109217			9.8832	15.0497	20.6501	10.6235	11.1164	10.5716	4.9828	8.0939	no	no	no	NA	NA	NA	NA	Embryophyta
1	GRMZM2G083738			21.3616	22.744	28.9009	18.4958	21.8999	19.0349	14.0449	17.2728	no	no	no	hypothetical protein LOC100279960 (LOC100279960), mRNA	hypothetical protein LOC100279960	RNA binding;RNA processing	Ribosomal_L1	Eukaryota
1	GRMZM2G107463			33.3309	40.7405	46.2941	30.1182	33.5015	40.9102	23.3919	28.3852	no	no	no	hypothetical protein LOC100383259 (LOC100383259), mRNA	hypothetical protein LOC100383259	protein binding;zinc ion binding;protein binding;zinc ion binding	Znf_RING	Embryophyta
1	GRMZM2G009448			521.199	485.28	877.688	180.136	181.384	382.022	202.173	216.185	no	no	no	glycine-rich RNA-binding protein 7 (LOC100284207), mRNA	glycine-rich RNA-binding protein 7	nucleic acid binding;membrane;protein homooligomerization;membrane;protein homooligomerization	Prion	Eukaryota
1	GRMZM2G072337			26.4275	36.6047	41.6321	24.6089	23.5451	29.8422	17.9658	20.2101	no	no	no	LOC100191823 (pco122658), mRNA	LOC100191823;LOC100191823	catalytic activity;cellular_component;RNA modification;iron-sulfur cluster binding;4 iron, 4 sulfur cluster binding;catalytic activity;cellular_component;RNA modification;4 iron, 4 sulfur cluster binding;catalytic activity;cellular_component;RNA modification;iron-sulfur cluster binding;4 iron, 4 sulfur cluster binding	Radical_SAM; Elp3/MiaB/NifB; Methylthiotransferase_CS; Methylthiotransferase; MiaB-like_B	Eukaryota
1	GRMZM2G017709			1.1666	0.8688	1.8874	0.3991	0.6674	0.7637	0.3567	0.8356	no	no	no	NA	NA	NA	NA	Eukaryota
1	AC184169.3_FG001			15.5609	16.9614	26.3685	13.0036	10.4247	14.2501	5.4778	15.2267	no	no	no	NA	NA	homoiothermy;ice binding;response to freezing	Antifreeze_1	Andropogoneae
1	GRMZM2G080930			42.6499	46.7581	41.2687	25.8801	24.6392	26.1824	18.2575	22.609	no	no	no	hypothetical protein LOC100194283 (LOC100194283), mRNA	hypothetical protein LOC100194283;hypothetical protein LOC100194283;hypothetical protein LOC100194283	nucleic acid binding;zinc ion binding;nucleic acid binding;zinc ion binding;nucleic acid binding;zinc ion binding	RRM_RNP1; Znf_CCHC	Eukaryota
1	GRMZM2G181415			1.1227	1.3048	1.2796	0.8077	0.6224	0.5303	0.7983	1.4463	no	no	no	hypothetical protein LOC100384221 (LOC100384221), mRNA	hypothetical protein LOC100384221	NA	NA	Zea mays
1	GRMZM2G170588			3.911	4.2277	5.2073	1.472	1.9809	4.239	1.7394	1.4814	no	no	no	NA	NA	NA	NA	NA
1	GRMZM5G821267			14.5918	17.8695	14.514	9.8616	9.4879	9.814	9.0328	10.5369	no	no	no	hypothetical protein LOC100383455 (LOC100383455), mRNA	hypothetical protein LOC100383455	ubiquitin ligase complex;ubiquitin-protein ligase activity;binding;protein ubiquitination	Ubox_domain; ARM-type_fold; Armadillo	Embryophyta
1	GRMZM2G048281			9.0267	9.0517	8.9627	6.0949	5.6452	7.032	5.0596	5.6258	no	no	no	NA	NA	protein binding;signal transducer activity;protein binding;response to light stimulus	NPH3; BTB/POZ_fold; BTB/POZ-like	Embryophyta
1	GRMZM2G045435			3.3122	3.8281	6.0457	2.8628	3.7218	2.7771	1.1403	2.3286	no	no	no	NA	NA	beta-1,4-mannosylglycoprotein 4-beta-N-acetylglucosaminyltransferase activity;protein amino acid N-linked glycosylation;membrane;beta-1,4-mannosylglycoprotein 4-beta-N-acetylglucosaminyltransferase activity;protein amino acid N-linked glycosylation;membrane	Glyco_trans_17	Eukaryota
1	GRMZM2G114667			11.8236	12.9086	16.6012	7.1721	8.553	7.5142	3.4621	4.0393	no	no	no	LOC100277947 (umc1734), mRNA	LOC100277947	nucleic acid binding;intracellular;zinc ion binding	Znf_U1; Znf_C2H2-like; Znf_DBF; Znf_C2H2	Magnoliophyta
1	GRMZM2G309025			3.2644	4.119	5.2826	3.3382	3.7949	1.5386	0.548	2.0023	no	no	no	S-domain class receptor-like kinase3 (pk3), mRNA	S-domain class receptor-like kinase3	serine-type endopeptidase activity;protein kinase activity;protein serine/threonine kinase activity;ATP binding;sugar binding;extracellular region;protein amino acid phosphorylation;proteolysis;blood coagulation;recognition of pollen	B_lectin_man-bd; S_locus_glycoprot; PAN-2_domain; PAN-1_domain; Se/Thr_prot_kinase-like_dom; Ser-Thr/Tyr-Pkinase; Kinase-like_dom; Pan_app; Apple; Tyr_Pkinase_cat_dom; Ser/Thr_prot_kinase_dom; Protein_kinase_ATP_BS; Ser/Thr_prot_kinase_AS	Embryophyta
1	GRMZM2G167741			41.8891	57.5713	51.8586	34.034	37.9973	26.89	19.6815	18.982	no	no	no	hypothetical protein LOC100384383 (LOC100384383), mRNA	hypothetical protein LOC100384383	NA	NA	Eukaryota
1	GRMZM2G052255			17.8424	25.0745	27.261	19.8153	23.5315	16.4451	10.3962	8.9397	no	no	no	NA	NA	NA	NA	Zea mays
1	GRMZM2G035843			56.3923	61.2486	122.164	42.7314	46.6616	36.6071	16.901	26.2939	no	no	no	NA	NA	protein kinase activity;protein serine/threonine kinase activity;calcium ion binding;ATP binding;protein amino acid phosphorylation	Se/Thr_prot_kinase-like_dom; Ser-Thr/Tyr-Pkinase; EF-hand; Kinase-like_dom; Tyr_Pkinase_cat_dom; Ser/Thr_prot_kinase_dom; EPS15_homology; EF_hand_Ca-bd; EF_Hand_1_Ca_BS; Protein_kinase_ATP_BS; Ser/Thr_prot_kinase_AS; Recoverin	Embryophyta
1	GRMZM2G149442			11.0524	11.2709	11.8914	4.9644	5.3858	8.6919	4.5845	5.4487	no	no	no	hypothetical protein LOC100383158 (LOC100383158), mRNA	hypothetical protein LOC100383158	zinc ion binding;zinc ion binding	Znf_DHHC	Eukaryota
1	GRMZM2G151706			37.0555	40.7001	40.1253	28.3971	22.6927	25.4364	23.5618	16.5089	no	no	no	NA	NA	DNA binding;DNA-directed RNA polymerase activity;transcription;protein dimerization activity	NA	Eukaryota
1	GRMZM2G133752			1.989	3.4134	4.5353	2.1697	1.9788	1.7869	1.0522	1.4785	no	no	no	NA	NA	NA	NA	Eukaryota
1	GRMZM2G110616			1.0533	1.0629	1.9011	0.0401	0.0657	0.2546	0.2135	0.0896	no	no	no	hypothetical protein LOC100383521 (LOC100383521), mRNA	hypothetical protein LOC100383521	catalytic activity;metabolic process	NA	Eukaryota
1	GRMZM2G149091			4.4103	9.3476	7.8942	5.1789	6.3145	5.2173	4.6127	4.1891	no	no	no	NA	NA	NA	NA	Zea mays
1	GRMZM2G006399			8.9843	11.8329	18.9732	8.924	9.7274	6.1249	4.0553	3.7768	no	no	no	NA	NA	protein binding;zinc ion binding	Znf_RING	Poaceae
1	GRMZM2G138258			7.9676	4.8712	6.7982	4.6423	2.2262	4.2374	3.0671	3.4088	yes	no	no	LOC100275802 (cl24605_1), mRNA	LOC100275802	NA	NA	Eukaryota
1	GRMZM2G031545			579.068	886.791	903.924	533.99	592.932	731.543	536.45	408.066	no	no	no	elongation factor 1-delta 1 (LOC100282885), mRNA	elongation factor 1-delta 1;elongation factor 1-delta 1;elongation factor 1-delta 1	translation elongation factor activity;eukaryotic translation elongation factor 1 complex;translational elongation;translation elongation factor activity;eukaryotic translation elongation factor 1 complex;translational elongation;translation elongation factor activity;eukaryotic translation elongation factor 1 complex;translational elongation;translation elongation factor activity;eukaryotic tran…	Glutathione-S-Trfase_C-like	Eukaryota
1	AC233864.1_FG002			3.6426	4.096	4.7665	2.3119	2.4899	1.9071	3.4903	3.3064	no	no	no	hypothetical protein LOC100382611 (LOC100382611), mRNA	hypothetical protein LOC100382611	DNA binding;ligand-dependent nuclear receptor activity;nucleus;regulation of transcription, DNA-dependent	NOR1_rcpt	Zea mays
1	GRMZM2G458075			8.0367	9.6828	10.474	4.3154	5.5196	7.9685	6.2461	7.896	no	no	no	NA	NA	protein kinase activity;protein serine/threonine kinase activity;ATP binding;protein amino acid phosphorylation	Se/Thr_prot_kinase-like_dom; Ser-Thr/Tyr-Pkinase; Kinase-like_dom; Tyr_Pkinase_cat_dom; Ser/Thr_prot_kinase_dom; Protein_kinase_ATP_BS; Ser/Thr_prot_kinase_AS	Eukaryota
1	GRMZM2G074320			60.0897	74.8249	61.3786	40.0729	51.3078	44.4506	28.8446	22.506	no	no	yes	NA	NA	NA	WD40_repeat_sg; WD40_repeat-like_dom; WD40_repeat; WD40_repeat_CS	Eukaryota
1	GRMZM2G536825			4.2609	3.5347	3.8455	0.907	1.3454	1.4158	1.432	1.0852	no	no	no	NA	NA	NA	NA	NA
1	GRMZM2G147882			10.4801	13.5793	14.0374	8.026	9.0005	9.0202	7.291	5.1144	no	no	no	hypothetical protein LOC100192575 (LOC100192575), mRNA	hypothetical protein LOC100192575	iron ion binding;oxidoreductase activity;oxidation reduction;iron ion binding;oxidoreductase activity;oxidation reduction;iron ion binding;oxidoreductase activity;oxidation reduction;iron ion binding;oxidoreductase activity;oxidation reduction	Oxoglutarate/Fe-dep_oxygenase; Isopenicillin-N_synthase	Eukaryota
1	GRMZM5G893444			11.9283	13.8851	18.9617	7.6298	7.5894	13.1365	7.8788	10.7195	no	no	no	NA	NA	transmembrane transport	Tetrpept_transpt	Eukaryota
1	GRMZM2G104081			29.4251	33.4439	45.166	30.059	30.3132	26.6442	20.8149	23.7303	no	no	no	LOC100192075 (si946063f09), mRNA	LOC100192075;LOC100192075;LOC100192075	ATP binding;carbohydrate metabolic process;phosphotransferase activity, alcohol group as acceptor;ATP binding;carbohydrate metabolic process;phosphotransferase activity, alcohol group as acceptor;ATP binding;carbohydrate metabolic process;phosphotransferase activity, alcohol group as acceptor	Hexokinase_N; Hexokinase_C; Hexokinase	Eukaryota
1	GRMZM2G169013			5.9218	5.5705	7.726	4.0694	5.9873	5.0132	3.0557	8.0751	no	no	no	hypothetical protein LOC100382353 (LOC100382353), mRNA	hypothetical protein LOC100382353	NA	NA	NA
1	GRMZM2G114882			8.9309	8.6898	8.7206	5.2154	7.7258	5.4703	4.0031	4.4536	no	no	no	hypothetical protein LOC100383855 (LOC100383855), mRNA	NA	NA	NA	Zea mays
1	GRMZM2G036640			4.1884	6.6172	9.8396	4.7184	4.4187	4.0227	2.9486	2.9441	no	no	no	tRNA-specific adenosine deaminase (LOC100285719), mRNA	tRNA-specific adenosine deaminase	catalytic activity;zinc ion binding;hydrolase activity;catalytic activity;zinc ion binding;hydrolase activity	CMP_dCMP_Zn-bd; Cytidine_deaminase-like; APOBEC/CMP_deaminase_Zn-bd	Eukaryota
1	GRMZM2G348921			14.9191	18.9566	21.2481	12.9933	14.1623	13.0041	7.4301	8.1587	no	no	no	hypothetical protein LOC100381920 (LOC100381920), mRNA	hypothetical protein LOC100381920	NA	NA	Eukaryota
1	GRMZM2G347762			0.3297	0.9475	0.7223	0.5011	0.5229	0.3368	0.2308	0.1761	no	no	no	NA	NA	NA	NA	NA
1	GRMZM2G580508			6.0786	8.7693	6.2733	5.2826	3.9917	4.3875	4.6885	2.1366	no	no	no	NA	NA	homoiothermy;ice binding;response to freezing	Antifreeze_1	NA
1	GRMZM2G047018			72.6019	89.6341	113.248	60.27	60.912	73.8264	55.7471	47.2135	no	no	no	PHD finger-like domain-containing protein 5A (LOC100286340), mRNA	PHD finger-like domain-containing protein 5A;PHD finger-like domain-containing protein 5A;PHD finger-like domain-containing protein 5A;PHD finger-like domain-containing protein 5A;PHD finger-like domain-containing protein 5A;PHD finger-like domain-containing protein 5A	NA	PHF5	Eukaryota
1	GRMZM2G063188			33.0186	28.0566	48.9003	26.5475	21.1948	22.0235	17.1359	25.4442	no	no	no	hypothetical protein LOC100274224 (LOC100274224), mRNA	hypothetical protein LOC100274224	NA	N2O_reductase_N	Embryophyta
1	AC211327.4_FG005			10.3339	11.5151	15.6254	8.1387	9.74	4.2716	3.3255	5.0145	no	no	no	NA	NA	G-protein coupled receptor protein signaling pathway;integral to membrane;purinergic nucleotide receptor activity, G-protein coupled	P2Y4_purnocptor	NA
1	GRMZM2G107985			21.0306	20.0538	30.5992	17.1573	15.8363	18.4027	11.7411	12.9261	no	no	no	LOC100277060 (si606058c09b), mRNA	LOC100277060;LOC100277060;LOC100277060	NA	NA	Tracheophyta
1	GRMZM2G360677			646.659	622.436	737.683	415.217	307.395	436.046	274.746	282.35	no	no	no	NA	LOC100193830;ribosomal protein S8	structural constituent of ribosome;intracellular;ribosome;translation;structural constituent of ribosome;intracellular;ribosome;translation;structural constituent of ribosome;intracellular;ribosome;translation;structural constituent of ribosome;intracellular;ribosome;translation	Ribosomal_S8e/biogenesis_NSA2; Ribosomal_S8e_CS	Eukaryota
1	GRMZM2G105321			3.8208	5.9938	5.7257	2.2647	4.1456	2.6141	2.9501	2.9806	no	no	no	NA	NA	NA	NA	NA
1	AC205077.3_FG003			53.5406	63.5821	56.6606	36.484	40.5869	24.549	21.4179	45.3278	no	yes	yes	NA	NA	NA	NA	NA
1	AC217665.3_FG005			14.2486	18.3625	17.4227	12.4219	16.8751	6.5616	4.5042	5.7831	no	no	no	LOC100193122 (cl4777_1c), mRNA	LOC100193122	GTP binding	AIG1	Eukaryota
1	GRMZM2G097410			1.1573	1.6397	1.7385	0.8272	0.6999	0.2374	0.2374	0.52	no	no	no	NA	NA	NA	NA	NA
1	GRMZM2G093574			233.057	287.029	318.038	179.99	218.793	167.88	125.594	81.9024	no	no	yes	NA	NA	structural constituent of ribosome;intracellular;ribosome;translation;structural constituent of ribosome;intracellular;ribosome;translation;structural constituent of ribosome;intracellular;ribosome;translation	Ribosomal_S21e	Eukaryota
1	GRMZM2G103490			32.9177	53.5583	62.5297	36.593	39.2256	38.0271	27.6573	43.726	no	no	no	hypothetical protein LOC100382088 (LOC100382088), mRNA	hypothetical protein LOC100382088;hypothetical protein LOC100382088	phospholipid binding;phospholipid binding	ANTH; Epsin_N; ENTH_VHS; Epsin-like_N	Eukaryota
1	GRMZM2G115615			30.9835	41.8524	47.8592	35.146	31.5936	40.6008	31.6268	28.464	no	no	no	hypothetical protein LOC100194143 (LOC100194143), mRNA	hypothetical protein LOC100194143	NA	TPR-1; TPR_2; TPR_repeat	Eukaryota
1	GRMZM2G040803			10.6735	11.7184	14.0461	4.2038	5.1403	8.383	3.9603	5.8941	no	no	no	ring domain containing protein (LOC100286356), mRNA	ring domain containing protein;ring domain containing protein	ubiquitin ligase complex;ubiquitin-protein ligase activity;protein binding;zinc ion binding;protein ubiquitination;ubiquitin ligase complex;ubiquitin-protein ligase activity;protein binding;zinc ion binding;protein ubiquitination	Znf_C3HC4_RING-type; Ubox_domain; Znf_RING-CH; Znf_RING; Znf_RING_CS	Eukaryota
1	GRMZM2G039792			5.6369	5.9957	6.7966	4.8576	5.9431	2.571	2.0135	2.8742	no	no	no	NA	NA	carboxylesterase activity;triglyceride lipase activity;lipid metabolic process;lipid catabolic process	Mono/diacylglycerol_lipase_N; Lipase_3	Eukaryota
1	GRMZM2G014729	ra3	ramosa3	76.1497	95.3181	191.703	11.1713	2.2818	54.5194	60.8726	9.0689	no	no	yes	ramosa3 (ra3), mRNA	ramosa3	catalytic activity;trehalose biosynthetic process;metabolic process;catalytic activity;trehalose biosynthetic process;metabolic process	Trehalose_PPase; HAD-SF_hydro_IIB	Eukaryota
1	GRMZM5G872417			70.7288	112.386	141.233	88.7559	89.7523	88.0016	60.5247	59.2555	no	no	no	LOC100284021 (AY110400), mRNA	LOC100284021	NA	LSM_domain; LSM_related_domain; LSM_domain_euk/arc	Eukaryota
1	GRMZM2G056594			1.5455	1.7484	1.5239	1.5251	1.1081	1.6785	0.7386	0.7374	no	no	no	hypothetical protein LOC100273731 (LOC100273731), mRNA	hypothetical protein LOC100273731	NA	Pentatricopeptide_repeat	Tracheophyta
1	GRMZM2G058491			2.841	2.3269	2.9637	2.2735	2.3808	0.8615	0.3328	0.4431	no	no	no	NA	NA	nucleotide binding;ATP binding;ATPase activity;nucleoside-triphosphatase activity	ATPase_AAA_core; ATPase_AAA-5; DEAD-like_N; ATPase_AAA+_core; ATPase_AAA_CS	Eukaryota
1	GRMZM2G365515			11.351	11.0053	13.1847	8.8697	9.8868	7.475	6.5026	9.9167	yes	no	no	mitochondrial carrier-like protein (LOC100281256), nuclear gene encoding mitochondrial protein, mRNA	mitochondrial carrier-like protein	transporter activity;binding;mitochondrial inner membrane;transport;membrane;transmembrane transport	Mitochondrial_sb/sol_carrier; Mitochondria_substrate_carrier; Aden_trnslctor	Eukaryota
1	GRMZM2G108463			15.6359	17.7993	22.3387	15.3158	14.5057	9.6263	8.5573	9.4169	no	no	no	hypothetical protein LOC100382239 (LOC100382239), mRNA	hypothetical protein LOC100382239	nucleus;nucleus	Cyclin_N; Cyclin_C; Cyclin-like; Cyclin; Ig/MHC_CS; Cyclin_L	Eukaryota
1	GRMZM2G506062			9.2065	17.1922	14.4374	9.6406	9.9311	13.8948	9.6179	9.5612	no	no	no	NA	NA	NA	NA	Poaceae
1	GRMZM2G419844			141.951	184.213	127.124	82.0465	101.265	35.3517	15.622	53.5872	no	yes	yes	NA	NA	NA	NA	Poaceae
1	GRMZM2G037882			6.3874	7.2634	9.8595	6.5091	6.185	7.0485	3.2204	4.0629	no	no	no	hypothetical protein LOC100277619 (LOC100277619), mRNA	hypothetical protein LOC100277619	NA	F-box_dom_cyclin-like; FBD; F-box_dom_Skp2-like; FBD-like	Poaceae
1	GRMZM2G110714			84.5768	105.019	125.799	69.45	66.0812	82.1185	47.8833	49.2717	no	no	no	hypothetical protein LOC100384708 (LOC100384708), mRNA	hypothetical protein LOC100384708;hypothetical protein LOC100384708	catalytic activity;tricarboxylic acid cycle;phosphoenolpyruvate carboxylase activity;carbon fixation;catalytic activity;tricarboxylic acid cycle;phosphoenolpyruvate carboxylase activity;carbon fixation	PEP_COase; Pyrv/PenolPyrv_Kinase_cat; PEP_COase_AS	Eukaryota
1	GRMZM2G100058			15.092	10.6386	16.1863	9.3218	11.3842	7.9404	5.9299	7.6694	yes	no	no	peptidase S8 and S53, subtilisin, kexin, sedolisin (LOC100280454), mRNA	peptidase S8 and S53, subtilisin, kexin, sedolisin	NA	Pentatricopeptide_repeat	Magnoliophyta
1	GRMZM2G175253			1.7069	1.7946	2.5808	1.3426	1.4012	0.9641	0.8284	1.2646	no	no	no	hypothetical protein LOC100279425 (LOC100279425), mRNA	NA	NA	Pentatricopeptide_repeat	Magnoliophyta
1	GRMZM2G163307			141.205	165.194	144.477	119.69	83.9413	66.9065	102.345	84.8764	yes	no	no	LOC100280088 (pco125769), mRNA	LOC100280088	NA	DUF92_TMEM19	Eukaryota
1	AC204891.4_FG001			1.2458	2.328	2.5398	0.5161	1.0448	0.4317	0.5337	0.2774	no	no	no	NA	NA	NA	NA	Zea mays
1	GRMZM2G352898			6.4461	8.8587	9.9685	7.2676	6.0062	6.6649	3.6051	7.8001	no	no	no	NA	NA	NA	Endo/exonuclease/phosphatase	Magnoliophyta
1	GRMZM2G124434			57.1117	99.9338	92.0078	45.0081	41.3243	58.2337	53.2836	42.7065	no	no	no	hypothetical protein LOC100192102 (LOC100192102), mRNA	hypothetical protein LOC100192102	catalytic activity;carbohydrate metabolic process;racemase and epimerase activity, acting on carbohydrates and derivatives;cellular metabolic process;coenzyme binding	NA	Eukaryota
1	GRMZM5G887054			243.894	300.918	325.857	207.187	184.947	252.969	148.342	163.674	no	no	no	NA	NA	nucleosome;DNA binding;structural constituent of ribosome;intracellular;ribosome;nucleosome assembly;translation;structural constituent of ribosome;intracellular;ribosome;translation;structural constituent of ribosome;intracellular;ribosome;translation;structural constituent of ribosome;intracellular;ribosome;translation	Ribosomal_L19/L19e	Eukaryota
1	GRMZM2G125516			165.129	203.655	244.115	144.58	179.712	147.251	111.901	172.112	no	no	no	LOC100279515 (pco103663), mRNA	LOC100279515	NA	DUF239_pln	Embryophyta
1	GRMZM2G083975			1.4014	1.5045	4.0454	0.6282	0.4252	0.4273	0.2967	0.2529	no	no	no	NA	NA	nucleic acid binding;zinc ion binding;nucleic acid binding;zinc ion binding	RRM_RNP1; Znf_CCHC	Eukaryota
1	GRMZM2G406315			6.2239	7.9727	12.6644	6.0072	6.2355	3.5099	2.5109	2.5139	no	no	no	NA	NA	NA	NA	Zea mays
1	GRMZM5G874832			3.8809	3.3613	4.5888	1.6577	1.1521	1.7618	2.0233	3.1531	yes	yes	yes	NA	hypothetical protein LOC100279697	NA	NA	Zea mays
1	GRMZM2G033029			25.1554	23.3063	28.8481	18.3905	18.3313	17.3145	8.728	11.7233	no	no	no	LOC100216692 (TIDP3766), mRNA	LOC100216692;LOC100216692;LOC100216692	NA	NA	Embryophyta
1	GRMZM2G099007			66.6727	87.3046	111.429	52.1735	56.4744	49.8166	44.3652	32.962	no	no	no	LOC100191203 (pco137008b), mRNA	LOC100191203	nucleus	G10; BUD31/G10-rel_CS	Eukaryota
1	GRMZM2G012600			23.7175	26.2918	30.9137	17.1451	20.4094	12.9947	10.2815	10.4473	no	no	no	NA	NA	cytoplasm;intracellular protein transport;protein transporter activity;membrane	Uso1_p115_C	Eukaryota
1	GRMZM5G878153			17.8814	14.5716	19.8269	13.9884	13.6719	12.8098	10.3196	12.9872	no	no	no	hypothetical protein LOC100383566 (LOC100383566), mRNA;hypothetical protein LOC100383566 (LOC100383566), mRNA	hypothetical protein LOC100383566;hypothetical protein LOC100383566	NA	ASCH_domain	Viridiplantae
1	GRMZM2G137174			2.6755	2.4328	3.9496	1.1077	1.4632	2.0614	1.1724	1.8376	no	no	no	hypothetical protein LOC100273985 (LOC100273985), mRNA	hypothetical protein LOC100273985	lipid metabolic process;metabolic process;lipid metabolic process;metabolic process	Patatin/PhospholipaseA2-rel; Acyl_Trfase/lysoPlipase	Magnoliophyta
1	GRMZM2G032484			22.1909	22.7984	21.7685	14.6634	15.4735	19.5333	13.5945	19.6204	no	no	no	hypothetical protein LOC100276476 (LOC100276476), mRNA	hypothetical protein LOC100276476	NA	NA	Poaceae
1	GRMZM2G007283			35.9237	39.5447	39.7083	24.4263	24.8634	35.6121	23.9059	30.3616	no	no	no	hypothetical protein LOC100272762 (LOC100272762), mRNA	hypothetical protein LOC100272762	protein kinase activity;protein serine/threonine kinase activity;ATP binding;protein amino acid phosphorylation;protein kinase activity;protein serine/threonine kinase activity;ATP binding;protein amino acid phosphorylation;protein kinase activity;ATP binding;protein amino acid phosphorylation	Kinase-like_dom; Protein_kinase_ATP_BS	Embryophyta
1	GRMZM5G866843			55.4132	51.6858	61.5217	45.1925	56.6835	20.0376	20.7149	35.1133	no	no	no	NA	NA	NAD+ ADP-ribosyltransferase activity;NAD+ ADP-ribosyltransferase activity	Poly(ADP-ribose)pol_cat_dom	Embryophyta
1	GRMZM2G072600			0.9032	1.8597	2.2885	1.1479	1.1065	1.1769	0.8367	0.7496	no	no	no	EMB2745 (LOC100283714), mRNA	EMB2745	NA	Pentatricopeptide_repeat	Magnoliophyta
1	GRMZM2G456669			0.8108	1.0327	1.3791	0.5676	0.8489	0.3101	0.2291	0.3975	no	no	no	NA	NA	protein kinase activity;protein serine/threonine kinase activity;protein binding;ATP binding;protein amino acid phosphorylation;defense response	LRR-contain_N2; Leu-rich_rpt; Se/Thr_prot_kinase-like_dom; Ser-Thr/Tyr-Pkinase; Kinase-like_dom; Leu-rich_rpt_typical-subtyp; Tyr_Pkinase_cat_dom; Ser/Thr_prot_kinase_dom; Disease_R; Protein_kinase_ATP_BS; Ser/Thr_prot_kinase_AS	Magnoliophyta
1	GRMZM2G397518	ba1	barren stalk1	192.575	194.625	200.355	66.6541	40.0138	121.084	120.798	60.8032	yes	no	no	barren stalk1 (BA1), mRNA	barren stalk1	nucleus;transcription regulator activity;regulation of transcription	HLH_DNA-bd_dom; HLH_DNA-bd	Embryophyta
1	GRMZM2G303374			604.994	713.259	1169.17	522.182	460.747	637.364	429.337	214.078	no	no	yes	hypothetical protein LOC100194153 (LOC100194153), mRNA;60S ribosomal protein L37a (LOC100280675), mRNA;hypothetical protein LOC100194153 (LOC100194153), mRNA;60S ribosomal protein L37a (LOC100280675), mRNA	hypothetical protein LOC100194153;60S ribosomal protein L37a;hypothetical protein LOC100194153;60S ribosomal protein L37a	structural constituent of ribosome;intracellular;ribosome;translation;structural constituent of ribosome;intracellular;ribosome;translation;structural constituent of ribosome;intracellular;ribosome;translation;structural constituent of ribosome;intracellular;ribosome;translation;structural constituent of ribosome;intracellular;ribosome;translation	Ribosomal_L37ae; Ribosomal_zn-bd_dom	Eukaryota
1	GRMZM2G438007			1.207	1.9027	1.5331	1.2319	1.3205	1.2862	0.4392	1.1505	no	no	no	NA	NA	protein kinase activity;protein serine/threonine kinase activity;protein binding;ATP binding;protein amino acid phosphorylation	LRR-contain_N2; Leu-rich_rpt; Se/Thr_prot_kinase-like_dom; Ser-Thr/Tyr-Pkinase; Kinase-like_dom; Leu-rich_rpt_RNase_inh_sub-typ; Leu-rich_rpt_typical-subtyp; Tyr_Pkinase_cat_dom; Ser/Thr_prot_kinase_dom; Protein_kinase_ATP_BS; Ser/Thr_prot_kinase_AS	Embryophyta
1	GRMZM2G404897			29.0475	31.1294	35.1751	11.8969	14.305	21.9931	15.2932	18.7262	no	yes	no	hypothetical protein LOC100277313 (LOC100277313), mRNA;hydrolase, NUDIX family protein (LOC100283048), mRNA	hypothetical protein LOC100277313;hypothetical protein LOC100277313;hydrolase, NUDIX family protein	intracellular;zinc ion binding;intracellular;zinc ion binding;intracellular;zinc ion binding;intracellular;zinc ion binding;hydrolase activity;metal ion binding	Znf_RanBP2; NADH_PPase-like_N; Znr_NADH_PPase; NUDIX_hydrolase_dom; NUDIX_hydrolase_dom-like; NUDIX_hydrolase_CS; Nudix_hydrolase	Eukaryota
1	GRMZM2G399284			20.5598	18.4391	27.7947	16.24	16.1905	17.9963	13.9169	15.1729	no	no	no	LOC100216904 (cl21464_1), mRNA	LOC100216904;LOC100216904	ATP binding;cytoplasm;protein folding;ATP binding;cytoplasm;protein folding;ATP binding;cytoplasm;protein folding;ATP binding;cytoplasm;protein folding;ATP binding;cytoplasm;protein folding;ATP binding;cytoplasm;protein folding	Chaperonin_Cpn10; GroES-like; Chaprnonin_Cpn10_CS; Chaprnonin_Cpn10_subgroup	Eukaryota
1	GRMZM2G159169			23.4706	28.6383	30.9044	16.3136	15.0106	16.3697	11.8421	10.8923	no	no	no	NA	NA	DNA binding;ligand-dependent nuclear receptor activity;histamine receptor activity;structural molecule activity;structural constituent of cell wall;nucleus;regulation of transcription, DNA-dependent;cell adhesion;G-protein coupled receptor protein signaling pathway;actin cytoskeleton;integral to membrane	Histamine_H3_recept; Pistil_extensin; Vinculin; NOR1_rcpt	NA
1	GRMZM2G023755			3.2762	5.0644	4.2726	2.5949	3.8246	2.5432	1.0779	1.2343	no	no	no	LOC100280854 (pco117356b), mRNA	LOC100280854	zinc ion binding;zinc ion binding	NA	Viridiplantae
1	GRMZM2G395853			11.0677	14.9083	17.3807	7.501	7.8342	10.1521	10.1522	10.0062	no	no	no	LOC100193217 (csu434), mRNA	LOC100193217	NA	Iojap-like_ribosome-assoc	Embryophyta
1	GRMZM2G059073			4.9728	6.0876	6.2735	5.0257	4.9584	6.3049	2.973	3.4713	no	no	no	NAD kinase 1 (LOC100281602), mRNA	NAD kinase 1	NAD+ kinase activity;ribokinase activity;D-ribose metabolic process;metabolic process;NAD+ kinase activity;ribokinase activity;D-ribose metabolic process;metabolic process	polyP/ATP_NADK_prd; ATP-NAD_kinase_PpnK-typ; Ribokinase	Eukaryota
1	GRMZM2G085600			30.3273	38.5651	37.9924	19.6183	15.9387	28.9488	16.1595	22.756	no	no	no	Ubiquitin carrier protein (LOC541984), mRNA	Ubiquitin carrier protein	small conjugating protein ligase activity;post-translational protein modification;regulation of protein metabolic process;small conjugating protein ligase activity;post-translational protein modification;regulation of protein metabolic process;small conjugating protein ligase activity;post-translational protein modification;regulation of protein metabolic process	UBQ-conjugat_E2; UBQ-conjugat/RWD-like	Eukaryota
1	GRMZM2G128663			24.9628	23.7401	26.4452	18.2352	18.0725	12.6316	10.7347	13.845	no	no	no	LOC100281422 (cl29544_1a), mRNA	LOC100281422	NA	PAPA1; Znf_HIT	Embryophyta
1	GRMZM2G123776			1.221	0.8442	1.2468	0.6167	1.3643	0.7232	0.6751	0.3613	no	no	no	hypothetical protein LOC100191960 (LOC100191960), mRNA	hypothetical protein LOC100191960	NA	Thioredoxin-like_fold	Eukaryota
1	GRMZM2G035356			20.1141	24.5974	34.4098	18.0998	20.3048	14.6491	11.4397	10.5541	no	no	yes	hypothetical protein LOC100303829 (LOC100303829), mRNA;LOC100272332 (pco082600), mRNA	hypothetical protein LOC100303829	NA	NA	Magnoliophyta
1	GRMZM2G131820			8.3654	6.0673	7.4229	5.6458	6.3721	2.2024	1.9682	1.9721	yes	no	no	hypothetical protein LOC100216732 (LOC100216732), mRNA	hypothetical protein LOC100216732	NA	Pentatricopeptide_repeat	Magnoliophyta
1	GRMZM2G003068			20.4248	35.9208	50.5538	20.7569	22.1442	24.4974	16.9364	19.7203	no	no	no	NA	NA	nucleic acid binding;zinc ion binding;nucleic acid binding;zinc ion binding;nucleic acid binding;zinc ion binding	Znf_CCHC	Eukaryota
1	GRMZM2G038606			76.9487	85.8251	84.5625	48.6737	43.9827	62.2876	46.9918	34.9015	no	no	no	U6 snRNA-associated Sm-like protein LSm4 (LOC100285873), mRNA	U6 snRNA-associated Sm-like protein LSm4;hypothetical protein LOC100384520	NA	LSM_domain; LSM_related_domain; LSM_domain_euk/arc	Eukaryota
1	GRMZM2G089741			10.3866	22.5949	29.2516	5.8992	11.6801	7.2037	5.8698	5.8297	no	no	no	NA	NA	NA	NA	NA
1	GRMZM2G399313			8.7176	11.3252	14.7624	7.2437	8.7329	5.4186	3.3434	3.4683	no	no	yes	hypothetical protein LOC100193972 (LOC100193972), mRNA	hypothetical protein LOC100193972	protein folding	PPIase_FKBP	Eukaryota
1	GRMZM2G408897			6.9885	8.4225	10.9116	5.4211	6.9617	6.8552	3.7621	6.0822	no	no	no	hypothetical protein LOC100384509 (LOC100384509), mRNA	hypothetical protein LOC100384509	protein binding;zinc ion binding	Znf_PHD-finger; Znf_FYVE_PHD; Znf_PHD; Zinc_finger_PHD-type_CS	Viridiplantae
1	GRMZM2G323024			4.3039	3.6316	3.6523	1.3298	1.9812	2.0943	1.0618	2.6501	no	no	no	hypothetical protein LOC100382191 (LOC100382191), mRNA	hypothetical protein LOC100382191	biosynthetic process;chlorophyll biosynthetic process;magnesium chelatase activity	CobN/Mg_chltase; BchH	Eukaryota
1	AC206223.3_FG010			8.1445	25.6183	26.8502	17.0623	17.7983	16.2339	13.286	8.3803	no	no	yes	NA	NA	NA	NA	Eukaryota
1	GRMZM2G059678			2.3052	3.0782	3.0087	1.763	2.8583	2.518	1.078	2.2788	no	no	no	hypothetical protein LOC100383445 (LOC100383445), mRNA	NA	NA	CXC	Eukaryota
1	GRMZM2G020728			19.2898	26.1895	32.7832	22.5059	21.1448	17.2081	13.8427	13.6352	no	no	no	G10-like protein (LOC100282560), mRNA	G10-like protein;G10-like protein	nucleus;nucleus	G10; BUD31/G10-rel_CS	Eukaryota
1	GRMZM2G068943			9.3428	12.691	23.9471	11.6615	6.6772	3.7959	2.2601	2.9089	no	no	no	trehalose-6-phosphate synthase (LOC100170239), mRNA	trehalose-6-phosphate synthase	catalytic activity;alpha,alpha-trehalose-phosphate synthase (UDP-forming) activity;trehalose biosynthetic process;catalytic activity;alpha,alpha-trehalose-phosphate synthase (UDP-forming) activity;trehalose biosynthetic process	Glyco_trans_20; Trehalose_PPase; Trehalose_OtsA	Eukaryota
1	GRMZM5G868966			11.1229	12.542	15.5854	10.8633	11.5431	11.9488	7.7342	9.8652	no	no	no	NA	NA	NA	NA	Zea mays
1	GRMZM2G019907			2.7102	2.4543	3.8443	2.2214	2.0734	1.1857	0.984	1.0126	no	no	no	LOC542756 (gpm638), mRNA	LOC542756	DNA binding;transcription factor activity;nucleus;regulation of transcription, DNA-dependent;sequence-specific DNA binding;protein dimerization activity;DNA binding;transcription factor activity;nucleus;regulation of transcription, DNA-dependent;sequence-specific DNA binding;protein dimerization activity	bZIP_1; bZIP_2; TF_bZIP; Leuzip_CREB	Embryophyta
1	GRMZM2G097190			15.7214	22.152	28.0837	17.4359	17.3213	17.5448	11.2158	12.0466	no	no	no	nucleotide-binding protein 1 (LOC100282965), mRNA	nucleotide-binding protein 1	ATP binding;ATP binding;ATP binding	ATPase-like_ParA/MinD; Mrp_CS	Eukaryota
1	GRMZM2G411668			0.3828	0.1969	0.502	0.0512	0.3967	0.0577	0.225	0.2543	no	no	no	hypothetical protein LOC100191537 (LOC100191537), mRNA;hypothetical protein LOC100280224 (LOC100280224), mRNA	hypothetical protein LOC100191537	protein kinase activity;protein serine/threonine kinase activity;ATP binding;sugar binding;protein amino acid phosphorylation;recognition of pollen;sugar binding	B_lectin_man-bd	Embryophyta
1	GRMZM5G842148			5.3493	4.7982	6.8908	3.9711	4.7777	6.1373	3.0396	4.7662	no	no	no	NA	NA	NA	NA	NA
1	GRMZM2G124288			72.3212	74.0396	103.844	62.6017	69.921	45.0371	30.4347	36.2008	no	no	no	LOC100276316 (pco127498b), mRNA	LOC100276316;LOC100276316	NA	NA	Embryophyta
1	GRMZM2G097738			4.3724	9.3895	8.8553	5.5117	6.6882	3.4457	2.5329	3.3449	no	no	no	hypothetical protein LOC100275574 (LOC100275574), mRNA	hypothetical protein LOC100275574	NA	NA	Embryophyta
1	GRMZM2G047131			0.1302	0.1466	0.118	0.0557	0.1025	0.0375	0.089	0.077	no	no	yes	hypothetical protein LOC100274165 (LOC100274165), mRNA	hypothetical protein LOC100274165	NA	NA	Poaceae
1	GRMZM2G078264			0.4698	1.2209	1.2211	0.5842	0.69	0.7115	0.4541	0.5094	no	no	no	hypothetical protein LOC100383165 (LOC100383165), mRNA	hypothetical protein LOC100383165	NA	Pentatricopeptide_repeat	Embryophyta
1	GRMZM2G048324			0.8059	0.961	1.1823	0.488	0.5601	0.7747	0.4195	0.596	no	no	no	nucleoredoxin1 (nrx1), mRNA	nucleoredoxin1	zinc ion binding;antioxidant activity;oxidoreductase activity;intracellular signaling pathway;cell redox homeostasis	Alkyl_hydroperoxide_Rdtase; C1_3; Thioredoxin-like_fold; Prot_Kinase_C-like_PE/DAG-bd; Znf_ZZ; Thioredoxin_CS; Thioredoxin_domain	Eukaryota
1	GRMZM2G458095			5.0693	4.3998	9.6176	2.1926	1.4019	1.6385	1.9668	1.7001	no	no	no	hypothetical protein LOC100273892 (LOC100273892), mRNA	hypothetical protein LOC100273892	nucleotide binding;nucleoside-triphosphatase activity;nucleotide binding;ATP binding;nucleoside-triphosphatase activity	ATPase_AAA_core; ATPase_AAA+_core; ATPase_AAA_CS; Chaprnin_clpA/B	Tracheophyta
1	GRMZM2G159691			39.8036	49.6309	35.564	22.6642	22.5629	35.0423	25.7938	21.0455	no	no	no	hypoxia induced protein conserved region containing protein (LOC100281627), mRNA;hypoxia induced protein conserved region containing protein (LOC100285999), mRNA	hypoxia induced protein conserved region containing protein;hypoxia induced protein conserved region containing protein	NA	Hypoxia_induced_prot_cons-reg	Embryophyta
1	GRMZM2G001116			1.7633	1.248	1.9174	1.3596	1.2356	0.9457	0.3409	1.0191	no	no	no	hypothetical protein LOC100382602 (LOC100382602), mRNA	hypothetical protein LOC100382602	NA	Calponin_act-bd; Calponin-homology; SM22_calponin	Viridiplantae
1	GRMZM2G044805			16.3076	25.0068	32.9702	18.8179	21.6972	14.4282	12.6035	10.9468	no	no	no	charged multivesicular body protein 4b (LOC100286131), mRNA	charged multivesicular body protein 4b	protein transport	NA	Eukaryota
1	GRMZM2G438755			4.7714	4.2546	6.9641	3.1845	2.8658	0.7352	1.0783	2.9099	yes	yes	yes	NA	NA	NA	NA	NA
1	GRMZM5G842645			26.9401	24.1505	39.8499	12.2961	15.0297	20.1274	27.8162	11.4612	no	no	no	hypothetical protein LOC100191347 (LOC100191347), mRNA;carboxy-lyase (LOC100284890), mRNA	hypothetical protein LOC100191347;carboxy-lyase	NA	CHP00730	Eukaryota
1	AC213463.3_FG002			7.9667	11.7499	15.4456	7.7895	10.1788	7.5303	4.1195	5.3195	no	no	no	LOC100191143 (pco099852b), mRNA	LOC100191143	NA	Eaf_ELL-associated_factor	Embryophyta
1	GRMZM2G176437			9.6937	14.304	19.8403	11.1325	11.1566	10.0085	7.32	8.0919	no	no	no	hypothetical protein LOC100194119 (LOC100194119), mRNA	hypothetical protein LOC100194119	NA	NA	Eukaryota
1	GRMZM2G027821			26.0688	38.9439	39.6387	28.1111	29.3105	39.0449	19.7086	31.3829	no	no	no	NA	NA	NA	NA	Embryophyta
1	GRMZM2G163242			3.1114	3.7296	4.8573	2.2378	3.1179	3.224	2.0032	3.1152	no	no	no	hypothetical protein LOC100382347 (LOC100382347), mRNA	hypothetical protein LOC100382347	binding	Armadillo; ARM-type_fold	Embryophyta
1	GRMZM2G357654			1.2864	1.6393	1.2774	0.5932	0.5405	0.5428	0.4383	0.2875	yes	no	no	NA	NA	structural constituent of ribosome;intracellular;ribosome;translation	Ribosomal_L37e; Ribosomal_zn-bd_dom	Zea mays
1	GRMZM5G885061			7.4093	6.1629	6.2097	5.2412	5.7032	3.1858	1.9194	2.579	no	no	no	NA	NA	NA	NA	NA
1	GRMZM2G136058			81.762	101.776	105.289	61.697	74.3114	81.9449	64.1718	64.206	no	no	no	hypothetical protein LOC100273431 (LOC100273431), mRNA	hypothetical protein LOC100273431	transport;integral to membrane	emp24_gp25L_p24	Eukaryota
1	GRMZM2G159149			31.5497	82.4701	63.286	60.2741	48.2206	1.6272	3.3029	21.205	yes	no	yes	carboxy-lyase (LOC100282620), mRNA	carboxy-lyase	NA	NA	Eukaryota
1	GRMZM2G178972			21.624	30.1715	26.9883	14.7098	14.9183	21.5518	19.6526	11.563	no	no	yes	LOC100281250 (pco110662), mRNA	LOC100281250	NA	Vps55	Viridiplantae
1	GRMZM2G099628			35.9839	39.1813	36.7529	23.9858	22.9636	29.0372	13.3706	17.6981	no	no	no	NA	NA	tRNA binding;nucleotide binding;aminoacyl-tRNA ligase activity;methionine-tRNA ligase activity;ATP binding;cytoplasm;translation;tRNA aminoacylation for protein translation;methionyl-tRNA aminoacylation;tRNA binding;nucleotide binding;aminoacyl-tRNA ligase activity;methionine-tRNA ligase activity;ATP binding;cytoplasm;translation;tRNA aminoacylation for protein translation;methionyl-tRNA aminoacy…	tRNA-bd_dom; NA-bd_OB-fold-like; tRNAsynth_1a_anticodon-bd	Eukaryota
1	GRMZM2G171644			2.3483	3.9738	4.2227	3.5188	2.9051	2.551	2.58	1.2114	no	no	no	NA	NA	NA	NA	Magnoliophyta
1	GRMZM2G060536			1.7699	2.7104	2.78	2.585	1.8356	1.8454	0.8479	1.4951	no	no	no	NA	NA	NA	Pentatricopeptide_repeat	Magnoliophyta
1	GRMZM2G060373			192.124	251.873	383.931	179.117	150.322	180.603	136.791	86.0457	no	no	no	LOC100286071 (cl3469_4c), mRNA;40S ribosomal protein S29 (LOC100282513), mRNA	40S ribosomal protein S29;40S ribosomal protein S29;40S ribosomal protein S29;LOC100286071;40S ribosomal protein S29	structural constituent of ribosome;intracellular;ribosome;translation;structural constituent of ribosome;intracellular;ribosome;translation	NA	NA
1	GRMZM2G150024			25.308	24.4228	32.2338	19.0787	19.6199	13.3465	9.296	13.9674	no	no	no	NA	NA	protein kinase activity;protein serine/threonine kinase activity;protein binding;ATP binding;protein amino acid phosphorylation;protein binding	LRR-contain_N2; Leu-rich_rpt	Embryophyta
1	GRMZM2G441144			0.8526	0.9573	1.0812	0.2751	0.1401	0.4696	0.7554	0.3238	no	no	no	thioredoxin-like 5 (LOC100284788), mRNA	thioredoxin-like 5	cell redox homeostasis	NA	Embryophyta
1	GRMZM2G026839			19.8488	19.2166	21.5887	16.0111	16.5696	8.3231	4.5315	3.6671	no	no	no	hypothetical protein LOC100278954 (LOC100278954), mRNA	hypothetical protein LOC100278954	NA	NA	Magnoliophyta
1	GRMZM2G020295			13.3077	16.0697	13.7566	9.5611	13.8278	10.9623	7.5108	9.4575	yes	no	no	LOC100283993 (pco148511), mRNA	LOC100283993	hydrolase activity	NA	Eukaryota
1	GRMZM2G399677			17.6744	16.901	20.9454	14.7881	15.4499	14.6746	12.2034	16.5934	no	no	no	hypothetical protein LOC100216849 (LOC100216849), mRNA;zinc finger, C3HC4 type family protein (LOC100282791), mRNA;hypothetical protein LOC100273012 (LOC100273012), mRNA	hypothetical protein LOC100216849;zinc finger, C3HC4 type family protein;hypothetical protein LOC100273012	zinc ion binding;zinc ion binding	Thioredoxin-like_fold	Embryophyta
1	GRMZM2G062953			32.2899	34.7417	57.2866	21.5402	28.2677	16.5436	11.8513	21.8986	no	no	no	hypothetical protein LOC100279184 (LOC100279184), mRNA;hypothetical protein LOC100279184 (LOC100279184), mRNA	hypothetical protein LOC100279184;hypothetical protein LOC100279184	intracellular;intracellular protein transport;intracellular;intracellular protein transport	GAT	Eukaryota
1	GRMZM2G438386			10.6475	10.1173	13.5829	4.4845	7.2631	6.9418	3.4864	5.9324	yes	no	no	LOC732784 (umc1147), mRNA	LOC732784	copper ion binding;oxidoreductase activity;oxidation reduction	Cu-oxidase_3; Cu-oxidase; Cu-oxidase_2; Cupredoxin	Embryophyta
1	GRMZM2G072671			27.5994	28.5939	54.5299	7.3388	7.0479	21.749	18.1476	11.6959	no	no	no	RNA-binding protein 8A (LOC100283893), mRNA	RNA-binding protein 8A	nucleic acid binding;RNA binding;nucleus;cytoplasm;RNA processing	RRM_RNP1; RNA-bd_8	Eukaryota
1	GRMZM5G896082			6.6863	5.885	9.1304	3.6171	4.256	2.5894	2.4956	2.1365	no	no	no	hypothetical protein LOC100273908 (LOC100273908), mRNA	hypothetical protein LOC100273908;hypothetical protein LOC100273908;hypothetical protein LOC100273908;hypothetical protein LOC100273908	NA	NA	Eukaryota
1	GRMZM2G058522	sod9	superoxide dismutase9	436.706	727.387	619.225	353.098	294.802	418.695	263.636	237.624	no	no	no	superoxide dismutase9 (sod9), mRNA	superoxide dismutase9;superoxide dismutase4;superoxide dismutase9;superoxide dismutase4;superoxide dismutase9;superoxide dismutase4;superoxide dismutase9;superoxide dismutase4;superoxide dismutase9;superoxide dismutase4	superoxide metabolic process;metal ion binding;oxidation reduction;superoxide metabolic process;metal ion binding;oxidation reduction;superoxide metabolic process;metal ion binding;oxidation reduction;superoxide metabolic process;metal ion binding;oxidation reduction;superoxide metabolic process;metal ion binding;oxidation reduction;superoxide metabolic process;metal ion binding;oxidation reducti…	SOD_Cu_Zn; SOD_Cu/Zn_BS	Eukaryota
1	GRMZM2G065215			1.7543	1.2091	2.6456	0.9836	0.7998	0.9208	0.302	0.3725	no	no	no	NA	NA	NA	NA	commelinids
1	GRMZM2G142922			8.7443	7.3142	7.6503	6.0664	6.426	4.1741	3.9199	4.6579	yes	no	no	NA	LOC100284855	NA	OPR_PB1	Tracheophyta
1	GRMZM2G074085			110.529	178.546	175.538	115.852	115.977	127.105	105.929	71.038	no	no	no	60S ribosomal protein L31 (LOC100280866), mRNA	60S ribosomal protein L31;LOC542196	structural constituent of ribosome;intracellular;ribosome;translation;structural constituent of ribosome;intracellular;ribosome;translation	Ribosomal_L31e	Eukaryota
1	GRMZM2G154029			16.3874	32.9718	30.1193	24.1711	25.8734	18.0935	17.3749	26.5236	no	no	no	hypothetical protein LOC100382122 (LOC100382122), mRNA	NA	nucleus;transcription regulator activity;regulation of transcription;nucleus;transcription regulator activity;regulation of transcription	HLH_DNA-bd; HLH_DNA-bd_dom	Magnoliophyta
1	GRMZM2G164088			125.027	126.319	193.414	80.5855	83.8316	59.6483	31.5173	43.3403	no	no	no	hypothetical protein LOC100273027 (LOC100273027), mRNA	hypothetical protein LOC100273027	nucleic acid binding	DNA/RNA-bd_Alba-like; Kininogen	Eukaryota
1	GRMZM2G446253			9.3147	15.3928	17.0717	11.2366	8.778	12.5011	8.1971	7.9589	no	no	no	NA	NA	phosphopyruvate hydratase complex;magnesium ion binding;phosphopyruvate hydratase activity;glycolysis	Enolase_N; Enolase_C; Enolase_CS; Enolase	Eukaryota
1	GRMZM2G063864			356.979	399.266	394.374	206.281	220.093	277.374	262.845	227.809	no	no	no	hypothetical protein LOC100273857 (LOC100273857), mRNA	hypothetical protein LOC100273857	protein binding;zinc ion binding;protein binding;zinc ion binding	NA	Viridiplantae
1	GRMZM2G430600			170.667	311.382	352.633	239.133	228.434	203.548	154.352	148.358	no	no	no	LOC100277218 (cl4730_1), mRNA;calmodulin (LOC100381315), mRNA	calmodulin;calmodulin;calmodulin;calmodulin;LOC100277218;calmodulin;calmodulin;calmodulin;calmodulin;calmodulin	calcium ion binding;calcium ion binding;calcium ion binding;calcium ion binding	NA	Viridiplantae
1	GRMZM2G030542			14.7229	16.6994	20.931	10.9121	10.3357	15.4951	12.5335	12.3661	no	no	no	NA	NA	NA	Reg_chr_condens; Reg_csome_cond/b-lactamase_inh	Eukaryota
1	GRMZM5G852833			12.5676	17.2823	20.9431	13.0909	15.0893	12.1386	10.7439	9.9573	no	no	no	hypothetical protein LOC100274354 (LOC100274354), mRNA	hypothetical protein LOC100274354	protein binding;zinc ion binding	DUF1644; Znf_RING	Embryophyta
1	GRMZM2G100505			46.2023	39.9677	48.7562	17.9959	16.968	35.8269	19.1348	15.7398	no	no	no	Rop3 small GTP binding protein (rop3), mRNA	Rop3 small GTP binding protein	GTPase activity;protein binding;GTP binding;intracellular;intracellular protein transport;nucleocytoplasmic transport;signal transduction;small GTPase mediated signal transduction;protein transport;GTP binding;intracellular;small GTPase mediated signal transduction;protein transport	NA	Eukaryota
1	GRMZM2G131245			8.8957	13.4628	12.2317	8.9401	12.5575	10.7642	5.0857	8.1675	no	no	no	ubiquitin-protein ligase/ zinc ion binding protein (LOC100281540), mRNA	ubiquitin-protein ligase/ zinc ion binding protein	nucleic acid binding;protein binding;zinc ion binding	Znf_C6HC; Znf_RING; Znf_CCHC; Znf_RING_CS	Viridiplantae
1	GRMZM2G480705			0.1981	0.4132	0.6337	0.2294	0.3291	0.1535	0.0557	0.0784	no	no	no	NA	NA	NA	NA	Zea mays
1	GRMZM2G165619			128.769	155.198	205.017	138.551	127.018	138.339	108.183	60.7612	no	no	no	40S ribosomal protein S29 (LOC100280803), mRNA	40S ribosomal protein S29;40S ribosomal protein S29;40S ribosomal protein S29;LOC100286071;40S ribosomal protein S29	structural constituent of ribosome;intracellular;ribosome;translation;structural constituent of ribosome;intracellular;ribosome;translation	Ribosomal_S14	Eukaryota
1	GRMZM2G082640			156.411	171.852	214.082	99.4676	103.667	113.78	74.4792	86.2787	no	no	no	NA	NA	alpha2-adrenergic receptor activity;G-protein coupled receptor protein signaling pathway;integral to membrane	NA	Magnoliophyta
1	GRMZM2G145152			17.9355	23.8682	25.8318	17.5243	19.3986	15.7307	12.7843	16.1402	no	no	no	hypothetical protein LOC100191722 (LOC100191722), mRNA	hypothetical protein LOC100191722	DNA binding;motor activity;flagellum assembly;bacterial-type flagellum hook;heat shock protein binding	DnaJ_N; AT_hook_DNA-bd_motif; Flag_hook	Magnoliophyta
1	GRMZM2G043150			51.2301	65.1007	67.7798	38.1369	40.2788	33.2025	21.4327	24.088	no	no	no	NA	NA	nucleic acid binding;RNA binding;voltage-gated potassium channel activity;potassium ion transport;integral to membrane;nucleic acid binding;RNA binding;voltage-gated potassium channel activity;potassium ion transport;integral to membrane	RRM_RNP1; RNA-recognition_dom1; Hud_Sxl_RNA; K_chnl_volt-dep_Kv3.3	Eukaryota
1	GRMZM2G085089			5.8993	8.13	7.3527	4.2997	3.8237	6.4981	4.3067	4.608	no	no	no	selenium-binding protein (LOC100281888), mRNA	selenium-binding protein	NA	Pentatricopeptide_repeat	Magnoliophyta
1	GRMZM2G542497			10.0164	14.8081	15.2387	11.522	10.6642	8.7181	4.7939	12.8226	no	no	no	NA	NA	NA	NA	Viridiplantae
1	GRMZM2G076544			79.8554	97.8739	116.807	74.972	68.6058	89.9795	80.2482	69.0861	no	no	no	peptidyl-prolyl cis-trans isomerase (LOC100282887), mRNA	peptidyl-prolyl cis-trans isomerase	peptidyl-prolyl cis-trans isomerase activity;protein folding	PPIase_cyclophilin; Cyclophilin-like; Pep-Pro_Isoase_cyclophilin_CS	Eukaryota
1	GRMZM2G014387			68.2843	75.7403	106.564	52.0793	55.654	56.3272	41.3969	47.9315	no	no	no	LOC100276754 (pco096827), mRNA	LOC100276754	NA	Homeodomain-like	Embryophyta
1	GRMZM2G002023			38.1368	57.4721	53.5411	35.0799	31.2445	41.6335	35.6437	51.6355	no	no	no	LOC100272808 (pco098921), mRNA;LOC100272808 (pco098921), mRNA	LOC100272808;LOC100272808	transferase activity, transferring glycosyl groups;transferase activity, transferring glycosyl groups	Glyco_trans_8	Eukaryota
1	GRMZM5G807234			6.4436	5.8223	8.824	3.1855	3.0511	3.2285	3.357	6.0175	no	yes	yes	NA	hypothetical protein LOC100279697	NA	NA	Zea mays
1	GRMZM2G340139			1.3684	0.5216	1.1359	0.7204	0.8122	0.3653	0.175	0.1744	no	no	no	NA	NA	catalytic activity;calcium-transporting ATPase activity;ATP binding;ATP biosynthetic process;cation transport;calcium ion transport;metabolic process;calcium ion transmembrane transporter activity;ATPase activity, coupled to transmembrane movement of ions, phosphorylative mechanism;membrane;hydrolase activity, acting on acid anhydrides, catalyzing transmembrane movement of substances	ATPase_P-typ_cation-transptr_N; ATPase_P-typ_ATPase-assoc-dom; Dehalogen-like_hydro; ATPase_P-typ_cation-transptr_C; ATPase_P-typ_ion-transptr; ATPase_P-typ_H-transp; ATPase_P-typ_cation-exchng_asu; ATPase_P-typ_P_site; ATPase_P-typ_Ca-transp_PMCA	Eukaryota
1	GRMZM2G073942			29.5722	34.0635	34.6957	24.5593	25.134	31.8378	20.0986	21.9181	no	no	no	NA	NA	NA	NA	Embryophyta
1	GRMZM2G160211			6.8253	7.9969	10.6074	5.2097	7.3434	6.2296	4.9887	4.951	no	no	no	NA	NA	NA	NA	Viridiplantae
1	GRMZM2G140170			3.8735	1.6851	3.3874	0.3566	0.5095	2.3624	0.5564	0.1829	no	no	no	hypothetical protein LOC100276043 (LOC100276043), mRNA	hypothetical protein LOC100276043	G-protein coupled receptor activity;alpha1-adrenergic receptor activity;G-protein coupled receptor protein signaling pathway;protein secretion;P-P-bond-hydrolysis-driven protein transmembrane transporter activity;membrane;integral to membrane;protein homooligomerization	Adren_rcpt_A1A; Prion; SecG; GPR6_rcpt	Poaceae
1	GRMZM2G041223			47.2125	72.2616	51.6287	23.6083	26.2529	54.3839	29.2756	30.7826	no	no	no	growth-regulating factor 6-like (GRF6), mRNA	growth-regulating factor 6-like	ATP binding;nucleus;hydrolase activity, acting on acid anhydrides, in phosphorus-containing anhydrides;regulation of transcription;ATP binding;nucleus;hydrolase activity, acting on acid anhydrides, in phosphorus-containing anhydrides;regulation of transcription	Gln-Leu-Gln_QLQ	Embryophyta
1	GRMZM2G180419			0.1094	0.5547	0.8038	0.0875	0.3494	0.1857	0.1324	0.1671	no	no	no	NA	NA	NA	NA	Magnoliophyta
1	GRMZM2G005493			38.051	68.4422	64.9312	45.3829	63.1368	50.6571	32.3855	30.8462	no	no	no	hypothetical protein LOC100194385 (LOC100194385), mRNA	hypothetical protein LOC100194385	carbohydrate metabolic process;xylose isomerase activity	Xyl_isomerase_TIM-brl; Xyl_isomerase-like_TIM-brl; Xylose_isomerase; Xylose_isom_bac	Eukaryota
1	GRMZM2G153863			17.9671	20.4443	24.683	16.3215	17.4725	19.3563	12.4507	18.7794	no	no	no	hypothetical protein LOC100272779 (LOC100272779), mRNA	hypothetical protein LOC100272779	RNA binding;structural constituent of ribosome;intracellular;ribosome;translation	Ribosomal_L21; Ribosomal_L21_CS	Eukaryota
1	GRMZM2G147712			31.0856	39.4491	62.5002	22.4952	25.4973	18.6736	11.5341	16.8754	no	no	no	hypothetical protein LOC100191260 (LOC100191260), mRNA	hypothetical protein LOC100191260	DNA binding;intracellular;sequence-specific DNA binding	CBFA_NFYB_domain; Histone-fold; Transcrpt_fac_CBFA/NFYB_topo	Eukaryota
1	GRMZM5G816457			26.6547	29.4068	42.5164	21.5907	29.085	19.838	16.5917	19.2382	yes	no	yes	hypothetical protein LOC100383070 (LOC100383070), mRNA	hypothetical protein LOC100383070;hypothetical protein LOC100383070	transcription factor activity;zinc ion binding;sequence-specific DNA binding;regulation of transcription;transcription factor activity;zinc ion binding;sequence-specific DNA binding;regulation of transcription	WRKY_DNA-bd; EHV_Unk	Embryophyta
1	GRMZM2G169890	sod4	superoxide dismutase4	194.111	325.1	393.139	215.35	174.101	289.523	171.319	154.718	no	no	no	superoxide dismutase4 (sod4), mRNA	superoxide dismutase4;superoxide dismutase4	superoxide metabolic process;metal ion binding;oxidation reduction;superoxide metabolic process;metal ion binding;oxidation reduction;superoxide metabolic process;metal ion binding;oxidation reduction;superoxide metabolic process;metal ion binding;oxidation reduction	SOD_Cu_Zn; SOD_Cu/Zn_BS	Eukaryota
1	GRMZM2G041262			1.9731	2.6541	2.3304	1.1088	2.0206	2.3674	1.6271	1.6107	no	no	no	NA	NA	NA	Nodulin-like	Embryophyta
1	GRMZM2G392320			11.8896	13.1807	13.991	9.9439	10.4283	5.4139	5.8401	6.8843	no	no	yes	hypothetical protein LOC100273800 (LOC100273800), mRNA;hypothetical protein LOC100274045 (LOC100274045), mRNA	hypothetical protein LOC100273800;hypothetical protein LOC100274045	protein binding;zinc ion binding	NA	Embryophyta
1	GRMZM2G103647			46.325	23.3077	46.1009	4.7111	4.2089	20.9665	15.4174	7.1812	no	no	no	light-inducible protein CPRF-2 (LOC100284034), mRNA	light-inducible protein CPRF-2	DNA binding;transcription factor activity;nucleus;regulation of transcription, DNA-dependent;sequence-specific DNA binding;protein dimerization activity;DNA binding;transcription factor activity;nucleus;regulation of transcription, DNA-dependent;sequence-specific DNA binding;protein dimerization activity	bZIP_1; bZIP_2; TF_bZIP; Leuzip_CREB; Leuzip_Jun	Embryophyta
1	GRMZM2G078124			6.7542	5.964	6.7266	3.8232	4.0337	4.6934	2.8564	3.4063	no	no	no	hypothetical protein LOC100279619 (LOC100279619), mRNA;rhodopsin-like receptor (LOC100282714), mRNA	hypothetical protein LOC100279619;rhodopsin-like receptor	NA	NA	NA
1	AC233910.1_FG002			0.4414	0.8631	0.9461	0.2127	0.34	0.1853	0.2001	0.1276	no	no	no	NA	NA	NA	NA	Viridiplantae
1	GRMZM2G143745			5.8107	6.5426	5.79	2.3191	2.1065	2.749	1.5475	2.0639	no	no	no	glycine-rich cell wall structural protein 2 (LOC100285159), mRNA	glycine-rich cell wall structural protein 2	alpha1-adrenergic receptor activity;G-protein coupled receptor protein signaling pathway;membrane;integral to membrane;protein homooligomerization;alpha1-adrenergic receptor activity;G-protein coupled receptor protein signaling pathway;membrane;integral to membrane;protein homooligomerization	Prion; Adren_rcpt_A1A; Gra6_protein	Panicoideae
1	GRMZM2G037743			13.7457	17.4876	24.2976	12.2745	12.5584	9.3755	6.9502	7.4305	no	no	no	LOC100282345 (si605019e07), mRNA	LOC100282345	NA	NA	Embryophyta
1	GRMZM2G172001			64.6857	69.8341	62.6817	44.188	46.446	42.069	31.3404	33.1865	no	no	no	PHD finger protein (LOC100283247), mRNA	PHD finger protein	protein binding;zinc ion binding;protein binding;zinc ion binding;protein binding;zinc ion binding	Znf_PHD-finger; Znf_FYVE_PHD; Znf_PHD; Zinc_finger_PHD-type_CS	Viridiplantae
1	GRMZM2G179090			8.4671	9.9324	12.2371	4.9503	6.3602	7.1595	5.9612	5.6952	no	no	no	NA	NA	GTP binding;intracellular;small GTPase mediated signal transduction;protein transport	Ras; GTPase_Rho; GTPase_Ras; GTPase_Rab; Ras_GTPase	Eukaryota
1	AC234171.1_FG003			12.2374	15.6967	13.6962	6.7767	10.0294	8.336	7.828	9.8113	no	no	no	NA	NA	phospholipid binding	ANTH; Epsin_N; ENTH_VHS; Epsin-like_N	Eukaryota
1	GRMZM2G050697			2.9843	3.6587	3.7228	1.4461	1.4401	1.5662	1.9896	3.3971	no	no	no	NA	NA	NA	Pentatricopeptide_repeat	Embryophyta
1	GRMZM2G162988			2.1145	2.2557	1.7844	1.6256	1.7797	2.0639	0.8107	1.3855	no	no	no	hypothetical protein LOC100273546 (LOC100273546), mRNA	hypothetical protein LOC100273546	DNA binding;DNA topoisomerase (ATP-hydrolyzing) activity;ATP binding;chromosome;DNA topological change	Pentatricopeptide_repeat; Topo_IIA_B	Tracheophyta
1	GRMZM2G080843			1.3782	1.0778	1.2685	0.3125	0.2251	0.5934	0.3088	0.3508	no	no	no	hypothetical protein LOC100383728 (LOC100383728), mRNA	hypothetical protein LOC100383728	NA	AA_transpt_TM	Embryophyta
1	GRMZM2G155767			10.9404	21.0635	27.3586	11.8914	11.349	8.554	7.6921	11.227	no	no	no	histidine kinase (HK1b1), mRNA;histidine kinase (HK1b2), mRNA	histidine kinase;histidine kinase	two-component sensor activity;two-component response regulator activity;two-component signal transduction system (phosphorelay);ATP binding;regulation of transcription, DNA-dependent;signal transduction;membrane;phosphorylation;transferase activity, transferring phosphorus-containing groups	CHASE; Sig_transdc_His_kin_sub1_dim/P; ATPase-like_ATP-bd; Sig_transdc_resp-reg_receiver; CheY-like; Sig_transdc_His_kin-like_C	Eukaryota
1	GRMZM2G431344			12.7481	20.0961	14.9675	8.344	5.7529	10.736	6.7689	4.3885	yes	no	yes	hypothetical protein LOC100280119 (LOC100280119), mRNA	NA	electron carrier activity;protein disulfide oxidoreductase activity;cell redox homeostasis	Glutaredoxin; Thioredoxin-like_fold; Glutaredoxin_sub	Eukaryota
1	GRMZM2G406588			0.0397	0.1093	0.1197	0	0	0	0.1052	0	no	yes	yes	hypothetical protein LOC100303965 (LOC100303965), mRNA;hypothetical protein LOC100381317 (LOC100381317), mRNA	hypothetical protein LOC100303965	NA	NA	Poaceae
1	GRMZM2G322846			99.3445	134.176	215.636	91.4322	107.973	73.0644	69.9212	35.635	no	no	no	NA	NA	NA	FATC	Eukaryota
1	GRMZM2G065496			42.5111	57.4036	86.5235	33.1943	38.1137	38.777	22.7677	22.5083	no	no	no	hypothetical protein LOC100193780 (LOC100193780), mRNA	hypothetical protein LOC100193780	DNA binding;regulation of transcription, DNA-dependent;DNA binding;regulation of transcription, DNA-dependent;DNA binding;regulation of transcription, DNA-dependent;DNA binding;regulation of transcription, DNA-dependent	TF_B3	Poaceae
1	GRMZM2G357660			37.3131	38.9318	45.6919	29.311	32.2784	24.9305	13.5329	14.0632	no	no	no	hypothetical protein LOC100304269 (LOC100304269), mRNA	hypothetical protein LOC100304269	protein binding;zinc ion binding;intracellular signaling pathway	Znf_PHD-finger; Znf_FYVE_PHD; Acyl_CoA_acyltransferase; Znf_PHD; Prot_Kinase_C-like_PE/DAG-bd; Zinc_finger_PHD-type_CS	Eukaryota
1	GRMZM2G095114			79.4838	95.6576	130.876	47.0934	55.5144	55.9522	39.0292	39.8065	no	no	no	hypothetical protein LOC100384520 (LOC100384520), mRNA	U6 snRNA-associated Sm-like protein LSm4;hypothetical protein LOC100384520	NA	NA	Eukaryota
1	GRMZM2G061187			10.4664	10.6914	12.2031	7.883	7.4109	9.1177	7.4194	7.7338	no	no	no	hypothetical protein LOC100276336 (LOC100276336), mRNA	hypothetical protein LOC100276336	NA	NA	Embryophyta
1	GRMZM2G077708			21.8544	43.1497	39.3312	26.6187	37.9697	29.9286	26.3406	12.0906	no	no	yes	NA	NA	NA	NA	Eukaryota
1	GRMZM2G116273	gst1	glutathione-S-transferase1	389.462	646.782	724.43	262.162	296.651	552.721	338.57	287.555	no	no	no	glutathione-S-transferase1 (gst1), mRNA	glutathione-S-transferase1	NA	Glutathione_S-Trfase_N; GST_C; Glutathione-S-Trfase_C-like; Thioredoxin-like_fold	Embryophyta
1	GRMZM2G080764			9.2331	13.3164	15.2259	9.7846	10.1335	12.5756	7.331	9.5301	no	no	no	hypothetical protein LOC100272267 (LOC100272267), mRNA	hypothetical protein LOC100272267	NA	Eaf_ELL-associated_factor	Embryophyta
1	GRMZM2G374973			1.6473	1.6037	3.8158	1.3371	0.9764	0.2196	0.1316	0.2927	no	no	no	NA	NA	ATP binding;phosphatidylinositol phosphate kinase activity;1-phosphatidylinositol-4-phosphate 5-kinase activity;phosphatidylinositol metabolic process	MORN; PInositol-4-P-5-kinase_core; PInositol-4P-5-kinase_core_sub; PIno-4-P-5_kinase_pln	Eukaryota
1	GRMZM2G352883			20.4925	24.0909	36.9561	15.5934	18.2858	12.1866	10.3479	12.9437	no	no	no	NA	NA	NA	NA	Poaceae
1	GRMZM5G822449			101.874	116.682	143.027	68.1972	89.4502	49.0356	52.767	42.5992	no	no	no	NA	NA	NA	NA	NA
1	GRMZM2G022645			21.3179	23.8461	18.9665	11.5087	14.6038	12.5999	11.5363	14.153	yes	no	no	hypothetical protein LOC100272952 (LOC100272952), mRNA	hypothetical protein LOC100272952	protein kinase activity;protein serine/threonine kinase activity;ATP binding;protein amino acid phosphorylation;cell wall macromolecule catabolic process	Se/Thr_prot_kinase-like_dom; Ser-Thr/Tyr-Pkinase; Kinase-like_dom; Peptidoglycan-bd_Lysin_sg; Ser/Thr_prot_kinase_dom; Tyr_Pkinase_cat_dom; Ser/Thr_prot_kinase_AS	Embryophyta
1	GRMZM2G306735			0.5504	2.215	1.618	0.9747	0.5846	0.706	0.5095	0.3041	no	no	yes	NA	NA	NA	NA	NA
1	AC231431.1_FG008			0	0.3988	0.6163	0.1154	0.2016	0	0	0	no	no	no	NA	NA	NA	NA	NA
1	GRMZM2G111632			13.9996	17.7639	18.711	11.1894	11.2382	11.2907	8.0682	7.3661	no	no	no	LOC100272684 (TIDP2929), mRNA	LOC100272684;LOC100272684;LOC100272684	membrane;transferase activity, transferring phosphorus-containing groups;membrane;transferase activity, transferring phosphorus-containing groups	NA	Eukaryota
1	GRMZM2G110483			0.6346	0.8591	1.2877	0.6891	0.7131	0.5632	0.2437	0.6186	no	no	no	NA	NA	acyl-CoA dehydrogenase activity;G-protein coupled receptor protein signaling pathway;blood coagulation;thrombin receptor activity;integral to membrane;oxidation reduction	Pentatricopeptide_repeat; Acyl-CoA_DH_CS; Prot_act_rcpt_4	Tracheophyta
1	GRMZM2G174834			0.8763	1.3932	1.3012	0.3165	0.6705	0.1445	0.1795	0.2812	no	no	no	hypothetical protein LOC100193098 (LOC100193098), mRNA	hypothetical protein LOC100193098	DNA binding;transcription factor activity;regulation of transcription, DNA-dependent;DNA binding;transcription factor activity;regulation of transcription, DNA-dependent;DNA binding;transcription factor activity;regulation of transcription, DNA-dependent;DNA binding;transcription factor activity;regulation of transcription, DNA-dependent;DNA binding;transcription factor activity;regulation of tra…	DNA-bd_integrase-typ; TF_ERF_DNA-bd	Embryophyta
1	GRMZM2G125557			58.7421	34.0919	64.6528	37.3869	34.4612	27.3308	34.4745	28.8821	yes	no	no	LOC100283971 (umc2505), mRNA;hypothetical protein LOC100384495 (LOC100384495), mRNA;hypothetical protein LOC100192502 (LOC100192502), mRNA	LOC100283971;hypothetical protein LOC100192502;hypothetical protein LOC100192502	NA	NA	Magnoliophyta
1	GRMZM2G165939			61.1681	83.3087	106.135	61.024	63.8321	60.559	41.1586	40.5787	no	no	no	developmentally-regulated GTP-binding protein 2 (LOC100283551), mRNA	developmentally-regulated GTP-binding protein 2	NA	TGS	Eukaryota
1	GRMZM2G165208			237.997	359.96	443.997	245.053	226.375	330.603	244.35	171.651	no	no	no	40S ribosomal protein S29 (LOC100303896), mRNA	40S ribosomal protein S29;40S ribosomal protein S29;40S ribosomal protein S29;LOC100286071;40S ribosomal protein S29	structural constituent of ribosome;intracellular;ribosome;translation	NA	NA
1	GRMZM2G340251	hsp70-4	heat shock protein70-4	1509.29	1794.03	1702.37	1171.66	1081.31	1201.35	942.008	1536.84	no	yes	yes	NA	NA	ATP binding;ATP binding;ATP binding;ATP binding	Hsp_70; Heat_shock_70_CS; Hsp70	Viridiplantae
1	GRMZM2G578659			0.9044	0.9382	1.4039	0.6542	0.8613	0.2644	0.3327	0.6408	no	no	no	NA	NA	NA	NA	NA
1	GRMZM2G159475			40.3522	49.1298	36.5919	21.0575	22.063	25.769	14.2678	18.4108	no	no	no	LOC100194157 (gpm542a), mRNA	LOC100194157;LOC100194157;LOC100194157;LOC100194157	NA	TF_GRAS	Magnoliophyta
1	GRMZM2G025054			71.8295	90.4615	89.4002	43.2493	44.3689	50.3559	36.2243	48.4809	no	no	no	transglutaminase (LOC100285057), mRNA	transglutaminase	homoiothermy;ice binding;response to freezing	NA	Embryophyta
1	GRMZM2G074472			28.6193	39.8955	31.4602	21.9501	27.834	38.3246	19.7723	27.1431	no	no	no	NA	NA	NA	NA	Embryophyta
1	GRMZM2G074280			23.1193	18.4214	34.4212	13.5786	11.8113	8.5557	9.3465	15.3928	no	no	yes	hypothetical protein LOC100383822 (LOC100383822), mRNA	NA	NA	NA	Embryophyta
1	GRMZM2G146978			2.3637	2.8191	2.9418	1.0204	2.4661	2.7757	1.5755	1.8693	no	no	no	NA	NA	NA	NA	NA
1	GRMZM5G870592			0.3515	0.4217	0.2787	0.1583	0.1831	0	0.054	0.098	no	no	no	NA	NA	DNA binding	Myb_DNA-bd; Homeodomain-like; SANT_DNA-bd	Eukaryota
1	GRMZM2G374779			13.1675	17.8571	19.6167	14.0068	14.3759	14.1525	14.5799	11.7043	no	no	yes	hypothetical protein LOC100193420 (LOC100193420), mRNA	hypothetical protein LOC100193420;hypothetical protein LOC100193420	protein modification process;palmitoyl-(protein) hydrolase activity;protein modification process;palmitoyl-(protein) hydrolase activity	NA	Eukaryota
1	GRMZM2G143767			27.6335	30.2104	37.6312	17.3397	17.5235	28.056	21.7728	16.2914	no	no	yes	LOC100285866 (cl29192_1), mRNA	LOC100285866	catalytic activity;homoiothermy;ice binding;response to freezing	Histidine_triad_HIT; His_triad-like_motif; Histidine_triad_CS; Antifreeze_1	Eukaryota
1	GRMZM2G049021			24.7417	30.367	30.9812	21.8375	22.2934	19.8087	22.1325	18.782	no	no	yes	isochorismatase family protein rutB (LOC100282265), mRNA	isochorismatase family protein rutB	catalytic activity;ATP binding;metabolic process;ATPase activity;catalytic activity;ATP binding;metabolic process;ATPase activity;catalytic activity;ATP binding;metabolic process;ATPase activity	Isochorismatase-like; ABC_transporter_CS	Viridiplantae
1	GRMZM2G149946			43.7556	48.4994	61.8627	43.9067	40.4492	35.5329	27.6239	37.803	no	no	no	LOC100282286 (pco132322), mRNA	LOC100282286;LOC100282286	NA	OST/Mg_transporter; Thioredoxin-like_fold	Viridiplantae
1	GRMZM2G113512			12.127	11.2188	13.2334	11.0297	10.057	11.6633	5.7836	9.279	no	no	no	hypothetical protein LOC100191951 (LOC100191951), mRNA	hypothetical protein LOC100191951	protein kinase activity;protein serine/threonine kinase activity;ATP binding;protein amino acid phosphorylation;protein kinase activity;protein serine/threonine kinase activity;ATP binding;protein amino acid phosphorylation;protein kinase activity;protein serine/threonine kinase activity;ATP binding;protein amino acid phosphorylation;protein kinase activity;protein serine/threonine kinase activit…	Se/Thr_prot_kinase-like_dom; Ser-Thr/Tyr-Pkinase; Kinase-like_dom; Tyr_Pkinase_cat_dom; Ser/Thr_prot_kinase_dom; Protein_kinase_ATP_BS; Ser/Thr_prot_kinase_AS	Embryophyta
1	GRMZM5G848542			9.1966	8.0611	12.3282	4.9669	5.6194	8.5928	6.5258	5.6809	no	no	no	NA	NA	NA	NA	Poaceae
1	GRMZM2G172506			2.3642	3.5869	4.4774	2.1667	2.2905	1.7845	0.9148	1.6835	no	no	no	hypothetical protein LOC100280174 (LOC100280174), mRNA	NA	signal transducer activity;protein binding;response to light stimulus	NPH3; BTB/POZ_fold; BTB/POZ-like	Embryophyta
1	GRMZM2G011932			27.8737	30.0092	43.8756	21.1256	16.9901	12.2492	16.7588	17.4944	no	no	no	G-box binding factor 1 (GBF1), mRNA;G-box binding factor 1 (GBF1), mRNA;hypothetical protein LOC100191525 (LOC100191525), mRNA	hypothetical protein LOC100191525;G-box binding factor 1;hypothetical protein LOC100191525;G-box binding factor 1	DNA binding;transcription factor activity;nucleus;transcription, DNA-dependent;regulation of transcription, DNA-dependent;sequence-specific DNA binding;regulation of transcription;protein dimerization activity;DNA binding;transcription factor activity;nucleus;transcription, DNA-dependent;regulation of transcription, DNA-dependent;sequence-specific DNA binding;regulation of transcription;DNA bindi…	MFMR	Embryophyta
1	GRMZM5G855375			33.243	35.1066	49.6804	31.3707	17.4323	12.2227	8.6972	11.6432	no	yes	yes	NA	NA	NA	NA	NA
1	GRMZM2G070865			8.839	6.5337	14.6496	3.5964	4.3621	8.2271	5.382	3.6704	yes	no	no	hypothetical protein LOC100384098 (LOC100384098), mRNA	hypothetical protein LOC100384098	homoiothermy;ice binding;response to freezing	Myb_DNA-bd; Homeodomain-like; Antifreeze_1; Myb-like+DNA-bd_dom_SHAQKYF	Embryophyta
1	GRMZM2G071112			1.7507	2.521	1.5821	0.6567	1.1873	1.4743	0.4677	0.8267	no	no	no	mini zinc finger 3 (LOC100285819), mRNA	mini zinc finger 3	NA	ZF_HD_homeobox_dimer_dom	Embryophyta
1	GRMZM2G145101			18.8844	22.82	19.9414	15.378	12.3847	7.1641	7.677	5.9461	yes	no	no	carbonic anhydrase (LOC100283312), mRNA	carbonic anhydrase;carbonic anhydrase	carbonate dehydratase activity;zinc ion binding;carbon utilization;carbonate dehydratase activity;zinc ion binding;carbon utilization;carbonate dehydratase activity;zinc ion binding;carbon utilization;carbonate dehydratase activity;zinc ion binding;carbon utilization	Carbonic_anhydrase; Carbonic_anhydrase_CS	Eukaryota
1	AC199315.4_FG001			69.8927	116.808	103.424	55.4127	62.4536	88.0561	68.2254	46.6407	no	no	no	NA	NA	NA	Sec61_beta	Viridiplantae
1	GRMZM2G012631			429.778	586.319	597.67	554.913	487.658	380.011	231.048	367.584	yes	yes	yes	HSP protein (HSP90-2), mRNA	heat shock protein 90;HSP protein	ATP binding;protein folding;response to stress;unfolded protein binding	Chaperone_htpG; ATPase-like_ATP-bd; Hsp90_C; Ribosomal_S5_D2-typ_fold; Hsp90_N; Heat_shock_protein_90_CS	Eukaryota
1	GRMZM5G864001			8.803	11.5859	9.7375	5.733	7.6594	3.0937	2.9852	4.7402	no	no	no	hypothetical protein LOC100193116 (LOC100193116), mRNA	hypothetical protein LOC100193116	protein binding;zinc ion binding	Znf_C3HC4_RING-type; Znf_RING; Znf_RING_CS	Embryophyta
1	GRMZM5G873870			8.8955	7.1116	8.4809	4.1239	4.6968	3.6846	3.3174	3.9276	no	no	no	NA	NA	NA	DUF791	Eukaryota
1	GRMZM2G138423			2.2528	1.4942	1.8996	1.4955	1.4649	0.6912	0.7189	0.7862	no	no	no	ADP,ATP carrier protein (LOC100282898), mRNA;ADP,ATP carrier protein (LOC100282898), mRNA	ADP,ATP carrier protein;ADP,ATP carrier protein	transporter activity;binding;mitochondrial inner membrane;transport;membrane;transmembrane transport;transporter activity;binding;mitochondrial inner membrane;transport;membrane;transmembrane transport;transporter activity;binding;mitochondrial inner membrane;transport;membrane;transmembrane transport;transporter activity;binding;mitochondrial inner membrane;transport;membrane;transmembrane trans…	Mitochondrial_sb/sol_carrier; Mitochondria_substrate_carrier; Mit_carrier; Aden_trnslctor	Eukaryota
1	GRMZM2G028379			168.485	226.547	214.527	161.592	142.121	166.86	156.243	112.65	no	no	no	p8MTCP1 (LOC100283861), mRNA	p8MTCP1	NA	CHCH; MTCP1	Viridiplantae
1	GRMZM2G417843			10.8148	10.3234	13.055	4.5976	4.8909	3.0587	4.6423	2.9827	no	no	no	hypothetical protein LOC100191272 (LOC100191272), mRNA	hypothetical protein LOC100191272	catalytic activity;metabolic process;hydrolase activity;phosphatase activity	NA	Eukaryota
1	GRMZM2G113235			1.0846	0.9289	1.5924	0.6467	1.0862	0.8839	0.5793	0.6605	no	no	no	NA	NA	NA	NA	NA
1	GRMZM2G110233			129.745	111.837	136.091	83.7311	75.179	46.365	26.6816	46.7769	no	no	no	NA	NA	NA	NOP5_N; NOSIC; SnoRNA-bd_dom	Eukaryota
1	GRMZM2G332829			1.1446	1.1408	0.9352	0.4519	0.3864	0.2109	0.1886	0.3627	no	no	no	NA	NA	proteolysis;cysteine-type peptidase activity	Peptidase_C48	Poaceae
1	GRMZM2G313737			4.0532	4.931	5.1315	4.824	3.7761	1.8663	1.4633	2.9877	no	no	yes	NA	NA	DNA binding;regulation of transcription, DNA-dependent	TF_B3	Poaceae
1	GRMZM2G112165			515.943	699.707	700.66	439.466	427.3	458.988	278.489	407.663	no	no	no	NA	NA	ATP binding;protein folding;response to stress;unfolded protein binding;ATP binding;protein folding;response to stress;unfolded protein binding	Hsp90_C; Ribosomal_S5_D2-typ_fold; ATPase-like_ATP-bd; Heat_shock_protein_90_CS; Hsp90_N	Eukaryota
1	GRMZM2G126148			12.1585	12.5607	13.531	8.7808	10.9036	8.1645	4.7775	5.1225	no	no	no	hypothetical protein LOC100383956 (LOC100383956), mRNA	hypothetical protein LOC100383956;hypothetical protein LOC100383956;hypothetical protein LOC100383956	DNA binding;DNA binding;DNA binding	SANT_DNA-bd	Magnoliophyta
1	GRMZM2G130389			0.7731	1.2273	1.3484	0.6063	0.0839	0.7469	0.5396	0.2281	no	no	yes	hypothetical protein LOC100277626 (LOC100277626), mRNA	hypothetical protein LOC100277626	protein kinase activity;protein serine/threonine kinase activity;ATP binding;protein amino acid phosphorylation	Se/Thr_prot_kinase-like_dom; Ser-Thr/Tyr-Pkinase; Kinase-like_dom; Tyr_Pkinase_cat_dom; Ser/Thr_prot_kinase_dom; Protein_kinase_ATP_BS	Poaceae
1	GRMZM2G012280			65.3594	88.4766	132.024	55.1902	55.8941	67.3879	41.9205	50.0142	no	no	no	hypothetical protein LOC100192675 (LOC100192675), mRNA	hypothetical protein LOC100192675	nucleic acid binding;zinc ion binding;nucleic acid binding;zinc ion binding	Znf_CCHC	Eukaryota
1	GRMZM2G156608			27.2332	33.0169	41.8459	26.4276	26.0163	33.1589	14.6336	35.1197	no	no	no	hypothetical protein LOC100383477 (LOC100383477), mRNA	hypothetical protein LOC100383477	steroid metabolic process;steroid metabolic process	NA	Eukaryota
1	GRMZM5G839812			11.7825	17.7175	18.6511	14.7884	14.2936	10.7645	5.9688	12.2201	no	no	no	hypothetical protein LOC100279254 (LOC100279254), mRNA	hypothetical protein LOC100279254	DNA binding;nucleus;transcription initiation;histone modification	Plus-3; Plus3-dom_subgr	Eukaryota
1	GRMZM2G400929			4.4723	2.4651	4.1377	2.2988	2.5438	2.2593	2.4064	2.5399	yes	yes	no	NA	NA	lipid metabolic process;hydrolase activity, acting on ester bonds	Lipase_GDSL; Esterase_SGNH_hydro-type	Magnoliophyta
1	GRMZM2G010406			101.032	127.41	164.381	103.145	97.5898	109.208	75.1937	78.334	no	no	no	hypothetical protein LOC100274106 (LOC100274106), mRNA	hypothetical protein LOC100274106;hypothetical protein LOC100274106	argininosuccinate synthase activity;ATP binding;arginine biosynthetic process;argininosuccinate synthase activity;ATP binding;arginine biosynthetic process;argininosuccinate synthase activity;ATP binding;arginine biosynthetic process;argininosuccinate synthase activity;ATP binding;arginine biosynthetic process;argininosuccinate synthase activity;ATP binding;arginine biosynthetic process;argininos…	Arginosuc_synth; Arginosuc_synth_CS	Eukaryota
1	GRMZM2G138659			17.8551	22.2409	20.8576	16.1017	19.3732	12.3671	5.7935	10.761	no	no	no	hypothetical protein LOC100382152 (LOC100382152), mRNA	hypothetical protein LOC100382152	motor activity;flagellum assembly;bacterial-type flagellum hook	DUF618; ENTH_VHS; RNA_polymerase_II_lsu_CTD; Flag_hook	Eukaryota
1	GRMZM2G047167			4.5212	5.8805	6.2946	5.054	5.0038	1.9059	1.3725	3.4217	no	no	no	NA	NA	protein binding;zinc ion binding	Znf_C3HC4_RING-type; VWA_CoxE; VWF_A; Znf_RING-CH; Znf_RING	Tracheophyta
1	GRMZM2G146472			298.439	337.564	294.896	126.877	133.122	217.911	187.544	178.008	no	no	no	hypothetical protein LOC100280198 (LOC100280198), mRNA	hypothetical protein LOC100280198;hypothetical protein LOC100280198	nucleic acid binding;nucleic acid binding;nucleic acid binding	DNA/RNA-bd_Alba-like	Eukaryota
1	GRMZM2G081102			191.232	285.26	264.748	264.352	205.035	288.673	214.708	157.594	no	no	yes	hypothetical protein LOC100273645 (LOC100273645), mRNA;hypothetical protein LOC100273645 (LOC100273645), mRNA	hypothetical protein LOC100273645;hypothetical protein LOC100273645;hypothetical protein LOC100273645	structural constituent of ribosome;intracellular;ribosome;translation;structural constituent of ribosome;intracellular;ribosome;translation;structural constituent of ribosome;intracellular;ribosome;translation	Ribosomal_L13e; Ribosomal_L13e_CS	Eukaryota
1	AC185415.3_FG005			8.7356	8.7854	11.1976	5.8609	4.8801	3.9408	2.2019	3.7343	no	no	no	NA	NA	nucleic acid binding;intracellular;zinc ion binding	RRM_RNP1; Znf_RanBP2	Eukaryota
1	GRMZM2G400135			12.1312	12.336	13.5823	6.3569	7.4616	8.1536	8.3051	7.3891	yes	no	no	hypothetical protein LOC100383055 (LOC100383055), mRNA	hypothetical protein LOC100383055	NA	NHL_repeat	Eukaryota
1	GRMZM2G170281			1.7279	1.4612	1.832	1.2005	1.2118	0.9966	0.4142	0.7557	no	no	no	hypothetical protein LOC100279547 (LOC100279547), mRNA	hypothetical protein LOC100279547	integral to membrane	EMP70	Eukaryota
1	GRMZM5G846399			7.5028	9.6023	8.7238	7.8175	6.4936	2.6192	3.1012	4.0406	no	no	no	NA	NA	NA	NA	Embryophyta
1	GRMZM2G398736			10.86	17.7964	15.5866	7.1757	10.578	12.1766	10.0582	13.7317	no	no	no	NA	CDK-activating kinase assembly factor MAT1 family protein	nucleus;cell cycle;nucleus;cell cycle	Cdk-activating_kinase_MAT1_cen	Eukaryota
1	GRMZM2G151893			6.7401	15.9499	14.1421	9.7637	11.7745	11.6874	10.0685	8.3355	no	no	no	LOC100193567 (si606070a01a), mRNA	LOC100193567;LOC100193567	transporter activity;binding;mitochondrion;mitochondrial inner membrane;transport;mitochondrial transport;membrane;transmembrane transport;transporter activity;binding;mitochondrial inner membrane;transport;membrane;transmembrane transport	Mitochondrial_sb/sol_carrier; Mitochondria_substrate_carrier; Mit_carrier; Aden_trnslctor	Eukaryota
1	AC217051.3_FG006	zcn5	phosphatidylethanolamine-binding protein5	37.559	66.4343	26.7601	7.1134	1.3902	0.2963	0.4568	0.1001	no	no	no	ZCN5 protein (ZCN5), mRNA	ZCN5 protein	NA	PtdEtn-bd_prot_PEBP; Phosphotidylethanolamine-bd_CS	Eukaryota
1	GRMZM2G001631			4.4322	4.7658	8.054	3.6836	4.4897	2.7027	2.5514	1.5909	no	no	no	NA	NA	RNA binding;double-stranded RNA binding;ribonuclease III activity;intracellular;RNA processing	RNase_III; Ds-RNA-bd	Eukaryota
1	GRMZM5G834260			1.8697	2.9448	1.6956	0.4958	0.127	0	1.2278	0.4481	yes	no	yes	NA	NA	NA	NA	Magnoliophyta
1	GRMZM2G091088			2.2682	3.271	3.8971	2.4479	2.2775	1.85	0.856	2.2049	no	no	no	hypothetical protein LOC100382486 (LOC100382486), mRNA	hypothetical protein LOC100382486	nucleotide binding;ATP binding;apoptosis;defense response;nucleoside-triphosphatase activity	NB-ARC; ATPase_AAA+_core; Disease_R	Magnoliophyta
1	GRMZM2G300348			11.9641	11.6314	12.0946	4.6068	5.1086	10.9346	5.0566	5.3355	no	no	no	yellow endosperm1 (y1), mRNA	yellow endosperm1	biosynthetic process;transferase activity;biosynthetic process;transferase activity;biosynthetic process;transferase activity;biosynthetic process;transferase activity	Squ/phyt_synthse; Terpenoid_synth; Squalene/phytoene_synthase_CS	Eukaryota
1	GRMZM2G703077			0.4565	1.0732	0.8463	0.3878	0.4411	0.5604	0.7356	0.6317	no	no	no	NA	NA	peptidyl-lysine modification to hypusine;peptidyl-lysine modification to hypusine	Deoxyhypus_synth	Eukaryota
1	GRMZM2G147256			17.6614	20.9622	26.6357	8.0615	9.4431	15.2932	7.7779	5.2703	no	no	no	hypothetical protein LOC100272842 (LOC100272842), mRNA	hypothetical protein LOC100272842	cellular amino acid metabolic process;lyase activity;cellular amino acid metabolic process;lyase activity;cellular amino acid metabolic process;biosynthetic process;transferase activity, transferring nitrogenous groups;lyase activity;pyridoxal phosphate binding	Aminotransferase_I/II; ArAA_b-elim_lyase/Thr_aldolase; PyrdxlP-dep_Trfase_major_dom	Eukaryota
1	GRMZM2G088018			1.9382	3.5397	4.7714	0.5999	0.4346	1.0785	0.9322	1.1105	no	no	no	NA	NA	NA	PyrdxlP-dep_Trfase_major_dom	Eukaryota
1	GRMZM2G119809	arpp2a	acidic ribosomal protein P2a	205.261	259.452	289.096	189.554	144.02	204.863	155.374	107.121	no	no	no	acidic ribosomal protein P2 (rpl12), mRNA	acidic ribosomal protein P2;acidic ribosomal protein P2;acidic ribosomal protein P2	structural constituent of ribosome;intracellular;ribosome;translation;translational elongation;structural constituent of ribosome;intracellular;ribosome;translation;translational elongation;structural constituent of ribosome;intracellular;ribosome;translational elongation;structural constituent of ribosome;intracellular;ribosome;translation;translational elongation	Ribosomal_60S; Ribosomal_P2	Eukaryota
1	GRMZM2G161472			3.9126	3.4598	3.8001	1.9978	1.7348	2.7117	1.98	1.3392	no	no	no	NA	NA	monooxygenase activity;iron ion binding;electron carrier activity;heme binding;oxidation reduction	Cyt_P450; Cyt_P450_CS; Cyt_P450_E_grp-I; Cyt_P450_E_grp-IV; Cyt_P450_B	Embryophyta
1	GRMZM2G123884			5.7782	6.0603	9.5089	3.9177	6.8604	3.3053	2.9269	3.0145	no	no	no	NA	NA	sodium ion transport;bile acid:sodium symporter activity;membrane	BilAc/Na_symport	Eukaryota
1	GRMZM2G145158			1.7073	1.8047	2.482	0	0.0745	1.2937	0.8634	0.093	no	no	no	hypothetical protein LOC100276327 (LOC100276327), mRNA;hypothetical protein LOC100303797 (LOC100303797), mRNA	hypothetical protein LOC100276327;hypothetical protein LOC100303797	homoiothermy;ice binding;response to freezing	Antifreeze_1	Magnoliophyta
1	GRMZM2G001953			9.2573	11.9289	13.8401	4.5315	5.6249	5.8693	4.5644	3.9683	no	no	yes	GTPase protein (GTPase), mRNA	GTPase protein	GTPase activity;protein binding;GTP binding;intracellular;intracellular protein transport;nucleocytoplasmic transport;signal transduction;small GTPase mediated signal transduction;protein transport	MIRO-like; Ras; GTPase_Ras; GTPase_Rab; GTPase_Rho; Ran_GTPase; Ras_GTPase; Small_GTP-bd	Eukaryota
1	AC217358.3_FG010			3.972	3.9704	6.8879	2.642	3.4514	2.4462	1.4608	3.0681	no	no	no	hypothetical protein LOC100217107 (LOC100217107), mRNA	hypothetical protein LOC100217107	NA	DUF901	Embryophyta
1	GRMZM2G162690			17.5733	14.6428	19.9743	9.6514	5.3328	3.9768	3.1134	4.2046	no	no	no	hypothetical protein LOC100280412 (LOC100280412), mRNA	hypothetical protein LOC100280412	catalytic activity;alpha,alpha-trehalase activity;trehalose metabolic process;catalytic activity;alpha,alpha-trehalase activity;trehalose metabolic process;catalytic activity;alpha,alpha-trehalase activity;trehalose metabolic process	Glyco_hydro_37; 6-hairpin_glycosidase-like	Eukaryota
1	GRMZM2G377487			4.3259	7.2331	6.7206	3.6856	3.7198	4.3318	3.8895	3.7527	no	no	no	NA	NA	NA	Rhodanese-like	Eukaryota
1	GRMZM2G083022			5.4567	9.0121	9.5189	6.0633	5.8744	4.8203	2.9532	4.8305	no	no	no	NA	NA	carbohydrate metabolic process;phosphotransferase activity, alcohol group as acceptor	Pentatricopeptide_repeat; Carb_kinase_FGGY_CS	Magnoliophyta
1	GRMZM2G034122			12.2078	15.5021	19.4023	13.4211	13.1088	10.2179	9.2585	11.3227	no	no	no	hypothetical protein LOC100381916 (LOC100381916), mRNA	hypothetical protein LOC100381916	NA	TPR_repeat	Eukaryota
1	GRMZM2G046587			31.0873	43.6022	50.2008	27.7754	25.7249	36.5903	23.9236	8.7816	no	no	yes	hypothetical protein LOC100383920 (LOC100383920), mRNA	hypothetical protein LOC100383920	magnesium ion binding;inorganic diphosphatase activity;cytoplasm;phosphate metabolic process;magnesium ion binding;inorganic diphosphatase activity;cytoplasm;phosphate metabolic process;magnesium ion binding;inorganic diphosphatase activity;cytoplasm;phosphate metabolic process	Pyrophosphatase	Eukaryota
1	GRMZM2G170632			53.0371	48.5896	59.6371	28.139	29.7407	29.9985	17.1293	24.6632	no	no	no	hypothetical protein LOC100194397 (LOC100194397), mRNA	hypothetical protein LOC100194397	nucleic acid binding;zinc ion binding;nucleic acid binding;zinc ion binding;nucleic acid binding;zinc ion binding	Znf_C2H2_LYAR	Viridiplantae
1	GRMZM2G161242			132.015	123.85	254.825	80.1056	74.5965	96.9997	62.2709	62.9708	no	no	no	LOC100191289 (TIDP3245), mRNA	LOC100191289	nucleic acid binding;zinc ion binding;nucleic acid binding;zinc ion binding	Znf_CCHC	Embryophyta
1	GRMZM2G359102			62.7975	78.5739	66.4208	30.2534	39.2391	51.967	40.4714	23.1929	no	no	no	LOC100283994 (csu902), mRNA	NA	NA	NA	NA
1	GRMZM2G141214			0.5676	0.5552	0.9325	0.4352	0.4306	0.605	0.2091	0.2316	no	no	no	NA	NA	oxidoreductase activity, acting on CH-OH group of donors;FAD binding	GMC_OxRdtase_N	Eukaryota
1	GRMZM2G056627			0.5237	0.248	0.897	0.0277	0.0842	0.3664	0.2095	0.0329	no	no	no	brittle stalk-2-like protein 5 (Bk2L5), mRNA	brittle stalk-2-like protein 5	carbohydrate binding	GPI-anchored_pln; Carb-bd	Embryophyta
1	GRMZM2G006704			140.807	183.06	200.622	113.088	103.768	117.783	96.7143	63.5315	no	no	no	NA	NA	cytochrome-c oxidase activity;mitochondrial respiratory chain;oxidation reduction	Cyt_c_oxidase_su5c	Embryophyta
1	GRMZM2G022213			27.1052	28.6674	26.2273	17.3187	16.6913	20.9031	15.0549	21.3565	no	no	no	hypothetical protein LOC100383144 (LOC100383144), mRNA	hypothetical protein LOC100383144	intracellular;zinc ion binding	Znf_C2H2; Znf_C2H2-like	Embryophyta
1	GRMZM2G383408			17.5683	19.3686	30.2737	8.4788	8.9029	13.2986	9.4377	18.351	no	no	no	hypothetical protein LOC100192085 (LOC100192085), mRNA	hypothetical protein LOC100192085	metabolic process;amino acid binding;metabolic process;amino acid binding	ACT-bd	Viridiplantae
1	GRMZM2G031591			5.408	5.5403	8.1059	3.9498	5.3258	2.6055	3.0531	2.3969	no	no	no	hypothetical protein LOC100278465 (LOC100278465), mRNA	hypothetical protein LOC100278465	NA	NA	Poaceae
1	GRMZM2G102346			16.4525	18.6306	26.9233	16.0688	17.5112	12.1743	5.5707	8.117	no	no	no	hypothetical protein LOC100383111 (LOC100383111), mRNA	hypothetical protein LOC100383111	catalytic activity	Ser/Cys_Pept_Trypsin-like	Embryophyta
1	GRMZM2G042881			16.9448	23.23	28.2343	17.1518	20.6193	13.2786	10.5896	12.3726	no	no	yes	LOC100194113 (pco131351), mRNA	LOC100194113	NA	NA	Eukaryota
1	GRMZM2G042118			593.056	669.868	747.764	317.543	333.793	226.286	132.82	142.579	no	no	no	LOC100283778 (pco106379), mRNA	LOC100283778	nucleic acid binding	NA	Eukaryota
1	GRMZM2G057529			3.6575	5.163	7.0871	3.9434	4.7601	3.1756	1.2876	2.2107	no	no	no	hypothetical protein LOC100193540 (LOC100193540), mRNA	hypothetical protein LOC100193540	NA	CCT_domain	Embryophyta
1	GRMZM2G036905			35.9052	38.5655	55.5595	34.2242	35.7868	29.3324	25.5665	20.367	no	no	yes	NA	NA	NA	NA	Zea mays
1	GRMZM2G132759			344.917	484.066	441.08	274.777	284.074	379.097	310.043	290.892	no	no	no	ubiquitin conjugating enzyme (UBC), mRNA	ubiquitin conjugating enzyme;ubiquitin conjugating enzyme;ubiquitin conjugating enzyme;ubiquitin conjugating enzyme;ubiquitin conjugating enzyme	small conjugating protein ligase activity;post-translational protein modification;regulation of protein metabolic process;small conjugating protein ligase activity;post-translational protein modification;regulation of protein metabolic process;small conjugating protein ligase activity;post-translational protein modification;regulation of protein metabolic process;small conjugating protein ligase …	UBQ-conjugat_E2; UBQ-conjugat/RWD-like	Eukaryota
1	GRMZM2G116574			4.5054	8.0023	8.8831	5.0065	4.062	5.611	5.214	5.8422	no	no	no	hypothetical protein LOC100382051 (LOC100382051), mRNA	hypothetical protein LOC100382051	protein binding;zinc ion binding	Znf_C3HC4_RING-type; Znf_RING; Znf_RING_CS	Embryophyta
1	GRMZM2G040561			9.7221	10.1766	12.7062	7.5	7.5492	6.5607	4.9098	6.0111	no	no	no	hypothetical protein LOC100273765 (LOC100273765), mRNA;hypothetical protein LOC100382193 (LOC100382193), mRNA	hypothetical protein LOC100382193	phosphoinositide 3-kinase complex;protein folding;signal transduction;heat shock protein binding;phosphatidylinositol-4,5-bisphosphate 3-kinase activity;unfolded protein binding;phosphoinositide 3-kinase complex;protein folding;signal transduction;heat shock protein binding;phosphatidylinositol-4,5-bisphosphate 3-kinase activity;unfolded protein binding	DnaJ_N; HSP_DnaJ_Cys-rich_dom; DnaJ_C; HSP40/DnaJ_pept-bd; PI3K_p85-bd; Heat_shock_DnaJ_CS; Hsp_DnaJ	Eukaryota
1	GRMZM2G083411			8.4194	9.7003	8.9741	3.3813	4.0302	3.8912	2.4063	1.6711	no	no	no	NA	NA	NA	NA	Embryophyta
1	GRMZM2G163914			16.1159	11.3744	20.4007	6.7316	13.8509	9.3472	4.1488	3.4646	yes	yes	yes	hypothetical protein LOC100383571 (LOC100383571), mRNA	hypothetical protein LOC100383571	DNA binding;regulation of transcription;DNA binding;regulation of transcription	NAM	Magnoliophyta
1	GRMZM5G898768			202.731	248.673	337.973	106.937	92.0111	195.327	131.887	125.902	no	no	no	DNA-directed RNA polymerase II 14.5 kDa polypeptide (LOC100285329), mRNA	DNA-directed RNA polymerase II 14.5 kDa polypeptide	DNA binding;DNA-directed RNA polymerase activity;transcription;nucleic acid binding;DNA binding;DNA-directed RNA polymerase activity;transcription;zinc ion binding;transcription regulator activity;regulation of transcription;nucleic acid binding;DNA binding;DNA-directed RNA polymerase activity;transcription;zinc ion binding;transcription regulator activity;regulation of transcription;nucleic acid…	DNA-dir_RNA_pol_M/15kDasu; Znf_TFIIS	Eukaryota
1	GRMZM2G056762			10.8322	8.3495	13.9838	6.8896	6.3741	8.9792	6.1946	7.5039	no	no	no	hypothetical protein LOC100276928 (LOC100276928), mRNA	hypothetical protein LOC100276928	NA	NA	Embryophyta
1	GRMZM2G110423			21.4568	29.32	24.2059	15.0214	16.6826	19.4433	15.0196	16.7666	no	no	no	hypothetical protein LOC100279995 (LOC100279995), mRNA	hypothetical protein LOC100279995	protein binding;zinc ion binding	NA	Eukaryota
1	GRMZM2G324705			155.755	256.285	397.356	183.37	194.785	128.557	106.949	95.7832	no	no	no	hypothetical protein LOC100276100 (LOC100276100), mRNA	hypothetical protein LOC100276100	NA	DUF642; Galactose-bd-like	Magnoliophyta
1	GRMZM2G701009			3.209	2.9643	4.1195	1.8893	2.0605	2.652	1.7854	1.8013	no	no	no	NA	NA	NA	NA	NA
1	GRMZM2G155565			12.6635	18.424	17.3277	10.8295	14.0806	9.846	8.4333	6.5084	no	no	no	NA	NA	NA	NA	Embryophyta
1	GRMZM2G160364			23.3467	27.8925	34.1484	10.4573	11.1197	16.763	9.8321	10.027	no	no	no	NA	NA	nucleic acid binding;intracellular;zinc ion binding	Znf_U1; Znf_C2H2-like; Znf_C2H2	Poaceae
1	GRMZM2G464295			2.1661	4.3702	4.6387	2.7305	3.3585	3.9301	2.3108	2.3259	no	no	no	glyoxalase/bleomycin resistance protein/dioxygenase (LOC100281531), mRNA	glyoxalase/bleomycin resistance protein/dioxygenase	NA	NA	Eukaryota
1	GRMZM2G007038			22.3875	22.658	25.9135	19.6283	23.3107	7.7224	6.755	9.6824	no	no	no	NA	NA	translation initiation factor activity;GTPase activity;GTP binding;intracellular;translational initiation;small GTPase mediated signal transduction;translation initiation factor activity;GTPase activity;GTP binding;intracellular;translational initiation;small GTPase mediated signal transduction	ProtSyn_GTP-bd; Transl_elong_EFTu/EF1A_2; Transl_elong_init/rib_B-barrel; IF2; Ras_GTPase	Eukaryota
1	GRMZM2G469795			32.0671	35.1161	43.0333	25.2804	31.3904	23.7555	20.2319	18.8222	no	no	no	hypothetical protein LOC100272722 (LOC100272722), mRNA	hypothetical protein LOC100272722	binding	ARM-type_fold	Embryophyta
1	GRMZM2G701675			2.0252	3.0151	3.1615	2.6134	1.9243	2.1442	0.8182	0.8221	no	no	no	NA	NA	NA	NA	NA
1	GRMZM5G806975			13.4475	18.7068	10.9271	3.3559	3.3511	0.7707	2.799	0.8678	no	no	yes	NA	NA	NA	NA	Zea mays
1	GRMZM2G011513			0.6775	4.8962	3.6664	1.0862	0.5542	2.4423	1.5651	1.0842	no	no	no	hypothetical protein LOC542763 (LOC542763), mRNA	hypothetical protein LOC542763	NA	C2_Ca-dep; C2_Ca/lipid-bd_dom_CaLB; C2_region	Tracheophyta
1	GRMZM2G085460			35.6276	42.5222	37.3781	26.7788	26.9061	17.7053	14.9926	9.0618	no	no	yes	NA	NA	NA	NA	Eukaryota
1	GRMZM2G125263			0.6007	0.5721	0.9497	0.4104	0.508	0.3484	0.2474	0.4143	no	no	no	NA	NA	protein kinase activity;protein serine/threonine kinase activity;protein binding;ATP binding;protein amino acid phosphorylation;pathogenesis	LRR-contain_N2; Leu-rich_rpt; Se/Thr_prot_kinase-like_dom; Ser-Thr/Tyr-Pkinase; Kinase-like_dom; Leu-rich_rpt_typical-subtyp; Tyr_Pkinase_cat_dom; Ser/Thr_prot_kinase_dom; BacInvasinC; Ser/Thr_prot_kinase_AS	Magnoliophyta
1	GRMZM2G477314			10.6501	9.4604	9.8487	4.9568	5.8158	6.4088	4.7335	7.0464	no	no	no	hypothetical protein LOC100191336 (LOC100191336), mRNA	hypothetical protein LOC100191336	homoiothermy;ice binding;response to freezing	Antifreeze_1	Viridiplantae
1	GRMZM2G133018			1.2022	2.2133	2.9919	0.9661	0.7398	0.414	0.9898	0.2758	no	no	no	hypothetical protein LOC100192619 (LOC100192619), mRNA	hypothetical protein LOC100192619	NA	NA	Magnoliophyta
1	GRMZM2G488692			3.8204	4.0299	4.0604	2.0689	2.7435	2.9244	1.348	1.526	no	no	no	NA	NA	transcription factor activity;nucleus;regulation of transcription, DNA-dependent	TF_CBFB	Panicoideae
1	GRMZM5G862959			24.3503	30.5079	43.8537	21.6269	24.8173	18.1743	11.2502	13.7814	no	no	no	LOC100273149 (pco119134), mRNA	LOC100273149;LOC100273149	NA	SAGA-associated-29	Embryophyta
1	GRMZM2G388911			49.2268	56.3019	70.7431	45.3365	40.9775	50.8707	33.8782	40.0954	no	no	no	hypothetical protein LOC100382366 (LOC100382366), mRNA	hypothetical protein LOC100382366	NA	NA	Embryophyta
1	GRMZM2G143377			3.5487	3.0445	3.3	2.4507	2.0609	1.7403	1.7298	2.396	yes	no	no	NA	NA	NA	Pentatricopeptide_repeat	Tracheophyta
1	GRMZM2G003927	ra1	ramosa1	11.2306	41.9864	34.3316	13.6331	11.7034	7.4874	16.6541	8.4395	no	no	no	hypothetical protein LOC100276104 (LOC100276104), mRNA	hypothetical protein LOC100276104	intracellular;zinc ion binding	Znf_C2H2; Znf_C2H2-like	Panicoideae
1	GRMZM2G056920			35.0733	34.0128	40.6827	18.5621	19.6757	16.6029	14.2599	19.8882	no	no	no	hypothetical protein LOC100193411 (LOC100193411), mRNA	hypothetical protein LOC100193411	nucleic acid binding;DNA binding;RNA binding;motor activity;ligand-dependent nuclear receptor activity;structural constituent of cell wall;nucleus;regulation of transcription, DNA-dependent;zinc ion binding;flagellum assembly;bacterial-type flagellum hook;nucleic acid binding;DNA binding;RNA binding;ligand-dependent nuclear receptor activity;structural constituent of cell wall;nucleus;regulation …	Znf_CCCH; KH_type_1_subgr; KH; Pistil_extensin; NOR1_rcpt	Embryophyta
1	GRMZM2G005652			4.3597	4.0128	6.3126	3.1048	3.0082	1.9394	1.6119	2.4368	no	no	no	NA	NA	structural constituent of ribosome;Rab GTPase activator activity;intracellular;ribosome;translation;regulation of Rab GTPase activity	RabGAP_TBC; Ribosomal_L11_CS	Eukaryota
1	GRMZM5G806743			4.1845	8.1666	7.9572	3.072	3.5792	5.404	4.165	2.1301	no	no	no	NA	NA	NA	NA	NA
1	GRMZM2G166713			6.7291	8.348	7.9975	5.035	4.8075	6.017	2.3459	2.6561	no	no	no	NA	NA	tRNA binding;nucleotide binding;aminoacyl-tRNA ligase activity;methionine-tRNA ligase activity;ATP binding;cytoplasm;translation;tRNA aminoacylation for protein translation;methionyl-tRNA aminoacylation	NA-bd_OB-fold-like	Eukaryota
1	GRMZM2G304965			1.6548	1.9664	2.4859	1.3681	1.8732	1.2548	0.6188	1.0582	no	no	no	NA	NA	beta-lactamase activity;beta-lactam antibiotic catabolic process;response to antibiotic	Pentatricopeptide_repeat; Peptidase_S8/S53_AS; Beta_lactamase_A/D; WD40_repeat_CS	Embryophyta
1	GRMZM2G112429			9.4881	10.7695	13.3411	8.5195	7.9832	8.3225	8.0159	10.2201	no	no	no	esterase/lipase/thioesterase (LOC100285540), mRNA	esterase/lipase/thioesterase	NA	NA	Eukaryota
1	GRMZM2G117746			24.7555	28.3893	34.272	18.5426	22.8577	13.7666	13.5038	22.2169	no	no	no	peptidyl-prolyl isomerase PASTICCINO1 (LOC100282570), mRNA	peptidyl-prolyl isomerase PASTICCINO1	protein folding	NA	Eukaryota
1	GRMZM2G123887			82.8527	106.205	111.612	74.1041	76.397	65.487	45.2781	67.6216	no	no	no	hypothetical protein LOC100191677 (LOC100191677), mRNA	hypothetical protein LOC100191677	chromatin;DNA binding;nucleus;regulation of transcription, DNA-dependent;chromatin;DNA binding;nucleus;regulation of transcription, DNA-dependent	AT_hook_DNA-bd_motif; DUF296; AT_hook-like; HMGI/HMGY	Embryophyta
1	GRMZM5G899031			1.8212	3.5955	2.0014	0.2456	0.7854	0.5134	0.3663	0.2301	yes	yes	yes	NA	NA	membrane;protein homooligomerization	Prion	NA
1	GRMZM2G053781			65.0314	78.7656	64.1103	45.5355	49.7176	47.9054	38.1328	40.9852	no	no	no	NA	NA	NA	Tropomyosin	Viridiplantae
1	GRMZM2G457118			0.4292	0.0874	0.369	0.2171	0.2536	0.1774	0.1077	0.1291	yes	no	no	NA	NA	NA	AT_hook-like	Magnoliophyta
1	GRMZM2G403218			30.0811	19.9135	36.9064	14.9694	15.7919	11.292	6.5696	12.5677	no	no	no	NA	NA	NA	Frigida	Poaceae
1	GRMZM2G035785			25.8493	37.6231	39.3991	25.6842	30.8782	32.4946	22.3514	21.0726	no	no	no	LOC100284043 (pco106173a), mRNA	LOC100284043	protein binding;zinc ion binding	Znf_C3HC4_RING-type; Znf_RING-CH; Znf_RING	Embryophyta
1	GRMZM5G875676			8.9272	14.2499	20.8462	5.8804	6.387	9.9425	6.3657	7.0277	no	no	no	retrotransposon protein (LOC100284223), mRNA	retrotransposon protein	NA	AcTrfase_GCN5_related_C; Acyl_CoA_acyltransferase	Eukaryota
1	GRMZM2G034882			4.8463	6.7991	7.5936	4.058	4.8437	4.3059	2.9558	2.8545	no	no	no	hypothetical protein LOC100276570 (LOC100276570), mRNA	hypothetical protein LOC100276570	NA	Tropomyosin	Magnoliophyta
1	GRMZM2G067223			39.7486	33.7494	63.6392	10.4501	7.4588	33.6236	23.9723	12.916	no	no	no	NA	NA	protein binding	WW_Rsp5_WWP	Magnoliophyta
1	GRMZM2G025214			39.8311	49.7944	64.1782	38.8024	36.251	27.6916	24.0246	26.5778	no	no	no	hypothetical protein LOC100272886 (LOC100272886), mRNA;STIP1 homology and U box-containing protein 1 (LOC100282870), mRNA	hypothetical protein LOC100272886;STIP1 homology and U box-containing protein 1	ubiquitin ligase complex;ubiquitin-protein ligase activity;protein ubiquitination;ubiquitin ligase complex;ubiquitin-protein ligase activity;protein ubiquitination;ubiquitin ligase complex;ubiquitin-protein ligase activity;protein ubiquitination	Ubox_domain	Eukaryota
1	GRMZM2G138516			0.8374	1.4195	1.3211	0.8545	0.7913	0.4122	0.2896	0.3811	no	no	no	hypothetical protein LOC100383870 (LOC100383870), mRNA	hypothetical protein LOC100383870	phospholipid binding	ANTH; Epsin_N; ENTH_VHS; Epsin-like_N	Eukaryota
1	GRMZM2G456603			13.7657	11.7698	13.8548	5.8562	11.5303	9.775	11.5727	7.0047	no	no	no	hypothetical protein LOC100276847 (LOC100276847), mRNA;hypothetical protein LOC100277851 (LOC100277851), mRNA	hypothetical protein LOC100276847;hypothetical protein LOC100277851	NA	NA	Embryophyta
1	GRMZM2G588715			0.8583	2.5475	2.4034	0.9854	1.5755	1.558	1.3716	0.5831	no	yes	yes	NA	NA	NA	NA	NA
1	GRMZM2G090647			50.2397	68.0353	84.4347	50.2271	47.7163	68.1739	37.4557	53.0808	no	no	no	hypothetical protein LOC100193621 (LOC100193621), mRNA	hypothetical protein LOC100193621;hypothetical protein LOC100193621;hypothetical protein LOC100193621;hypothetical protein LOC100193621;hypothetical protein LOC100193621	NA	Proteasome-int_thioredoxin_C	Eukaryota
1	GRMZM2G169360			2.3159	10.723	7.3309	0.5392	1.7093	0.4456	3.4278	0.9031	no	no	yes	NA	NA	NA	NA	Magnoliophyta
1	GRMZM2G066469			4.2405	7.5187	9.5212	4.247	4.8956	6.1399	3.4819	3.9008	no	no	yes	hypothetical protein LOC100384465 (LOC100384465), mRNA	mitochondrial inner membrane protease subunit 1;LOC100282484;hypothetical protein LOC100384465	proteolysis;serine-type peptidase activity;membrane	Peptidase_S24_S26_cons-reg; Peptidase_S24_S26A/B/C; Pept_S26A_signal_pept_1	Eukaryota
1	GRMZM2G166753			1.7048	2.1569	2.0105	1.3119	1.7945	2.0706	1.0337	1.3366	no	no	no	hypothetical protein LOC100280025 (LOC100280025), mRNA	NA	NA	NA	Embryophyta
1	GRMZM2G001991			1.7187	2.3291	1.7461	0.7345	0.4805	1.1863	1.6169	0.5412	no	no	no	hypothetical protein LOC100280347 (LOC100280347), mRNA	hypothetical protein LOC100280347	catalytic activity;3-beta-hydroxy-delta5-steroid dehydrogenase activity;steroid biosynthetic process;metabolic process;oxidoreductase activity;cellular metabolic process;coenzyme binding;catalytic activity;3-beta-hydroxy-delta5-steroid dehydrogenase activity;steroid biosynthetic process;metabolic process;oxidoreductase activity;cellular metabolic process;coenzyme binding	DH_sc/Rdtase_SDR; Epimerase_deHydtase; 3Beta_OHSteriod_DH/Estase	Embryophyta
1	GRMZM2G122223			13.7474	24.0573	29.2735	16.5398	10.8558	19.4248	14.0555	11.5874	no	yes	yes	LOC100281993 (cl16240_2), mRNA	LOC100281993	protein binding;zinc ion binding	Znf_C3HC4_RING-type; Znf_RING-CH; Znf_RING	Viridiplantae
1	GRMZM2G180422			61.5313	79.0407	93.4932	57.4963	66.6275	69.223	62.0831	57.5229	no	no	no	LOC100280170 (IDP2552), mRNA	LOC100280170	leukemia inhibitory factor receptor binding;extracellular region	Leukemia_IF	Embryophyta
1	GRMZM2G405760			19.2373	25.3349	27.593	13.1192	13.6788	20.6356	16.589	16.1032	no	no	no	LOC100276365 (gpm129), mRNA	LOC100276365	NA	MDM35_apoptosis	Magnoliophyta
1	GRMZM2G349193			3.2405	3.1868	3.9431	1.9558	1.753	1.257	1.4311	1.4538	no	no	no	hypothetical protein LOC100279651 (LOC100279651), mRNA	NA	NA	Pentatricopeptide_repeat	Magnoliophyta
1	GRMZM2G426553			3.0752	3.7624	4.9698	2.4354	2.9114	1.7	0.968	1.8373	no	no	no	NA	NA	NA	Pentatricopeptide_repeat	Tracheophyta
1	GRMZM5G829663			1.0977	4.0139	4.1762	1.6706	1.5676	2.0412	2.9474	2.162	no	no	no	NA	NA	NA	NA	NA
1	GRMZM2G051079			4.4409	4.1618	4.9116	3.6282	4.4243	1.9572	1.2772	2.4374	no	no	no	hypothetical protein LOC100274255 (LOC100274255), mRNA;hypothetical protein LOC100274255 (LOC100274255), mRNA	hypothetical protein LOC100274255;hypothetical protein LOC100274255	protein kinase activity;protein serine/threonine kinase activity;ATP binding;protein amino acid phosphorylation;protein kinase activity;protein serine/threonine kinase activity;ATP binding;protein amino acid phosphorylation	Se/Thr_prot_kinase-like_dom; Ser-Thr/Tyr-Pkinase; Kinase-like_dom; Tyr_Pkinase_cat_dom; Ser/Thr_prot_kinase_dom; Ser/Thr_prot_kinase_AS	Eukaryota
1	GRMZM2G456564			32.307	41.2673	52.9307	31.1331	37.0169	21.0905	13.338	25.295	no	no	no	NA	NA	NA	NA	Zea mays
1	GRMZM2G038374			21.5104	21.1013	29.3742	10.5933	13.9093	10.726	8.321	11.4108	no	yes	yes	NA	NA	nucleus;transcription;zinc ion binding	Beta-tubulin_BS	Eukaryota
1	GRMZM2G306345			5.5011	3.2682	5.3813	1.3273	2.1053	5.0812	0.9995	1.1576	yes	no	yes	NA	NA	catalytic activity;phosphorylation;transferase activity, transferring phosphorus-containing groups;catalytic activity;phosphorylation;transferase activity, transferring phosphorus-containing groups;catalytic activity;ATP binding;kinase activity;phosphorylation;transferase activity, transferring phosphorus-containing groups;pyruvate, phosphate dikinase activity;catalytic activity;ATP binding;kinas…	PPDK_PEP-bd; PEP-utiliz_enz_mobile_dom; PEP_utilisers; Pyrv/PenolPyrv_Kinase_cat; PEP_mobile_CS; Pyruvate_phosphate_dikinase	Eukaryota
1	GRMZM2G093038			44.1922	46.4697	88.2007	23.4928	24.1095	41.9916	22.8881	26.4136	no	no	no	NA	NA	NA	NA	NA
1	GRMZM2G160069			8.2269	11.6692	16.021	2.8274	3.3677	6.3184	5.2285	8.6041	no	no	no	hypothetical protein LOC100383930 (LOC100383930), mRNA	hypothetical protein LOC100383930	transporter activity;transport;dicarboxylic acid transport;membrane;integral to membrane;sodium:dicarboxylate symporter activity;substrate-specific transmembrane transporter activity;transmembrane transport	Sub_transporter; MFS_1; MFS_general_subst_transpt; Sugar/inositol_transpt; Na-dicarboxylate_symporter; Sugar_transporter_CS	Eukaryota
1	GRMZM5G891343			31.6307	35.4683	35.1175	14.5101	14.8622	22.4859	20.8983	13.2383	no	no	no	hypothetical protein LOC100304286 (LOC100304286), mRNA	hypothetical protein LOC100304286	NA	NA	NA
1	AC217401.3_FG003			9.9713	7.5604	12.4674	4.577	6.7915	7.2939	5.1983	4.5861	no	no	no	NA	NA	protein kinase activity;protein serine/threonine kinase activity;protein binding;ATP binding;protein amino acid phosphorylation	LRR-contain_N2; Leu-rich_rpt; Se/Thr_prot_kinase-like_dom; Ser-Thr/Tyr-Pkinase; Kinase-like_dom; Tyr_Pkinase_cat_dom; Ser/Thr_prot_kinase_dom; Protein_kinase_ATP_BS; Ser/Thr_prot_kinase_AS	Embryophyta
1	GRMZM2G158162			27.1403	24.478	25.5615	19.8078	19.1724	18.8876	15.7642	24.4167	yes	no	yes	hypothetical protein LOC100382023 (LOC100382023), mRNA	hypothetical protein LOC100382023;hypothetical protein LOC100382023;hypothetical protein LOC100382023	DNA binding;regulation of transcription, DNA-dependent;zinc ion binding;DNA binding;regulation of transcription, DNA-dependent;zinc ion binding;DNA binding;regulation of transcription, DNA-dependent;zinc ion binding	TF_B3; Znf_CW; Znf_FYVE_PHD	Viridiplantae
1	GRMZM2G124313			11.8497	16.3845	17.5589	10.8136	8.1358	10.7131	9.4685	9.4619	no	yes	yes	CDP-diacylglycerol--glycerol-3-phosphate 3-phosphatidyltransferase (LOC100284703), mRNA	CDP-diacylglycerol--glycerol-3-phosphate 3-phosphatidyltransferase	CDP-diacylglycerol-glycerol-3-phosphate 3-phosphatidyltransferase activity;phospholipid biosynthetic process;membrane;integral to membrane;phosphotransferase activity, for other substituted phosphate groups	CDP-OH_P_trans; Phosphatidylglycerol_P_synth	Eukaryota
1	GRMZM2G126900			183.362	173.565	407.98	34.1505	31.6374	132.036	65.8381	18.4574	no	no	no	hypothetical protein LOC100273421 (LOC100273421), mRNA	hypothetical protein LOC100273421	iron ion binding;cytoplasm;inositol catabolic process;inositol oxygenase activity;oxidation reduction;iron ion binding;cytoplasm;inositol catabolic process;inositol oxygenase activity;oxidation reduction;iron ion binding;cytoplasm;inositol catabolic process;inositol oxygenase activity;oxidation reduction	NA	Eukaryota
1	GRMZM2G164672			7.4535	8.1839	13.1738	5.2332	6.1262	6.8275	3.0184	3.8543	no	no	no	NA	NA	NA	NA	NA
1	GRMZM2G011404			16.4579	11.3583	13.6238	11.8725	11.8371	9.5732	4.6612	10.0445	yes	no	no	EMB2756 (LOC100281466), mRNA	EMB2756	NA	DUF616	Embryophyta
1	GRMZM2G130305			9.4719	12.1911	16.2342	9.433	10.779	8.0905	5.5297	4.9788	no	no	no	esterase (LOC100282186), mRNA	esterase	aminopeptidase activity;proteolysis;aminopeptidase activity;proteolysis	AB_hydrolase_1; Peptidase_S33	Viridiplantae
1	GRMZM2G074087			11.2599	13.5879	18.827	8.7433	14.1476	9.7336	11.5468	6.7893	yes	no	yes	hypothetical protein LOC100273256 (LOC100273256), mRNA	hypothetical protein LOC100273256	NA	X8	Embryophyta
1	GRMZM2G127548			13.1865	15.6783	16.3422	10.0792	11.5874	10.3938	7.6179	8.383	no	yes	no	NA	NA	NA	BSD	Viridiplantae
1	GRMZM2G145085			0.8265	1.5769	1.6053	0.7255	0.5089	1.2838	0.4858	0.1974	no	no	no	NA	NA	DNA binding;RNA polymerase II transcription factor activity;catalytic activity;voltage-gated potassium channel activity;protein binding;nucleus;transcription initiation from RNA polymerase II promoter;potassium ion transport;voltage-gated potassium channel complex;zinc ion binding;transcription activator activity;positive regulation of transcription	TFIIF-alpha; TFIIF_interaction; Znf_RING; K_chnl_volt-dep_Kv2.2	Embryophyta
1	GRMZM2G001850			133.653	208.219	310.879	147.946	140.674	105.304	59.2192	54.8013	no	no	no	NA	NA	nucleic acid binding	RRM_RNP1	Eukaryota
1	GRMZM2G414955			7.0396	5.3212	10.6121	0.9848	0.987	3.5148	2.743	1.9587	no	no	no	NA	NA	NA	NA	NA
1	GRMZM2G089517			11.7517	23.95	22.6715	17.5937	18.4148	16.1494	12.6168	12.6458	no	no	no	hypothetical protein LOC100304364 (LOC100304364), mRNA	hypothetical protein LOC100304364	NA	NA	commelinids
1	GRMZM2G114888			22.2354	24.4246	24.9187	24.1875	18.8676	12.4231	7.4821	15.3204	no	no	no	LOC100281473 (pco147515), mRNA	LOC100281473	RNA binding;structural constituent of ribosome;intracellular;ribosome;translation	NA	Eukaryota
1	GRMZM2G114055			185.011	238.164	168.912	95.4426	86.661	155.505	96.4684	110.612	no	no	no	transposon protein Mutator sub-class (LOC100285179), mRNA	transposon protein Mutator sub-class	signal transducer activity;protein binding;response to light stimulus;signal transducer activity;protein binding;response to light stimulus	NPH3; BTB/POZ_fold; BTB/POZ-like	Embryophyta
1	GRMZM2G155314			26.5305	34.5977	33.3662	23.9383	22.4603	29.8891	17.9059	17.1859	no	no	no	LOC100193710 (pco141871), mRNA	LOC100193710	NA	Ankyrin_rpt; TPR-1; TPR_2; Ankyrin_rpt-contain_dom; TPR_repeat	Embryophyta
1	GRMZM2G144071			3.941	3.995	4.5776	2.666	2.6404	1.7253	1.1572	2.1315	no	no	no	hypothetical protein LOC100279406 (LOC100279406), mRNA	hypothetical protein LOC100279406	NA	Pentatricopeptide_repeat	Magnoliophyta
1	GRMZM2G166979			7.8226	10.4458	11.0084	3.8093	5.7107	2.9847	2.1801	3.6723	no	no	no	NA	NA	NA	NA	NA
1	GRMZM2G138178			65.7967	60.9437	143.348	42.6269	45.6826	18.7545	13.1193	24.973	no	no	yes	NA	NA	metabolic process;transferase activity;metabolic process;transferase activity	VWF_A; Aminotrans_II_pyridoxalP_BS	Embryophyta
1	GRMZM2G011806			3.0326	4.1785	5.0236	2.7855	3.5312	2.1944	2.3066	1.7822	no	no	no	hypothetical protein LOC100381406 (LOC100381406), mRNA	hypothetical protein LOC100276469;hypothetical protein LOC100381406	protein kinase activity;protein serine/threonine kinase activity;protein binding;ATP binding;protein amino acid phosphorylation	LRR-contain_N2; Leu-rich_rpt; Ser-Thr/Tyr-Pkinase; Se/Thr_prot_kinase-like_dom; Kinase-like_dom; Leu-rich_rpt_typical-subtyp; Tyr_Pkinase_cat_dom; Ser/Thr_prot_kinase_dom; Protein_kinase_ATP_BS; Ser/Thr_prot_kinase_AS	Embryophyta
1	GRMZM2G413193			63.701	64.3202	91.0673	45.7225	46.8198	28.9839	19.2245	29.2197	no	no	no	hypothetical protein LOC100192596 (LOC100192596), mRNA	hypothetical protein LOC100192596	nucleic acid binding;zinc ion binding;nucleic acid binding;zinc ion binding;nucleic acid binding;zinc ion binding	NA	Eukaryota
1	GRMZM2G049398			44.4653	56.5938	57.676	29.2484	30.2756	35.2474	26.8478	22.1821	no	no	no	hypothetical protein LOC100191814 (LOC100191814), mRNA	hypothetical protein LOC100191814	NA	Ribosome/NADH_DH	Eukaryota
1	GRMZM2G012052			41.0348	64.9034	65.7337	45.3793	49.3496	40.7055	34.4544	23.425	no	yes	yes	ubiquitin-conjugating enzyme protein E2 (ubc7), mRNA	ubiquitin-conjugating enzyme protein E2	small conjugating protein ligase activity;post-translational protein modification;regulation of protein metabolic process	UBQ-conjugat_E2; UBQ-conjugat/RWD-like	Eukaryota
1	GRMZM2G318662			46.0841	72.7348	95.1598	35.5846	46.7097	54.5128	45.8409	55.403	no	no	no	NA	NA	NA	NA	NA
1	GRMZM2G172258			176.792	229.89	247.417	122.372	134.953	100.647	76.0492	96.4642	no	no	no	hypothetical protein LOC100273619 (LOC100273619), mRNA	hypothetical protein LOC100273619	RNA binding;nutrient reservoir activity	Glutenin	Eukaryota
1	GRMZM5G872934			2.219	3.1485	2.1021	1.1989	1.37	2.3744	1.1805	1.5625	no	no	no	hypothetical protein LOC100384384 (LOC100384384), mRNA	hypothetical protein LOC100384384	oxidoreductase activity;oxidation reduction	AldOxase/xan_DH_Mopterin-bd	Eukaryota
1	GRMZM2G332801			4.7735	5.7487	4.0532	1.9966	2.0271	2.1688	1.3826	3.1237	yes	no	yes	hypothetical protein LOC100383906 (LOC100383906), mRNA	NA	NA	NA	NA
1	GRMZM2G033962			7.5212	6.5209	8.1551	3.0565	2.8481	0.9015	0.4081	0.7083	no	no	yes	NA	NA	two-component response regulator activity;two-component signal transduction system (phosphorelay);regulation of transcription, DNA-dependent	Sig_transdc_resp-reg_receiver; CCT_domain; CheY-like; Lectin_legB_Mn/Ca_BS	Viridiplantae
1	GRMZM2G094900			22.7041	37.9877	61.1175	26.3642	26.7094	20.2443	13.915	13.5033	no	no	no	NA	NA	inositol or phosphatidylinositol phosphatase activity	Endo/exonuclease/phosphatase; IPPc	Magnoliophyta
1	GRMZM5G852338			11.7492	18.545	26.5293	11.6496	14.8739	5.2028	6.7087	9.3149	no	no	no	NA	NA	NA	NA	Eukaryota
1	GRMZM2G050693			32.0225	36.7852	48.5291	23.9551	24.2543	33.2034	28.4704	30.0619	no	no	no	LOC100216654 (pco105945), mRNA	LOC100216654	NA	DUF179	Eukaryota
1	GRMZM2G017193			4.2366	9.619	8.2456	4.936	4.3405	4.2884	5.7524	3.8182	no	no	no	hypothetical protein LOC100192827 (LOC100192827), mRNA	hypothetical protein LOC100192827	flavin-containing monooxygenase activity;oxidoreductase activity;FAD binding;NADP or NADPH binding;oxidation reduction	FAD_pyr_nucl-diS_OxRdtase; Pyridine_nuc-diS_OxRdtase_2; Flavin_mOase; Flavin_mOase_1	Embryophyta
1	GRMZM5G812538			3.1627	5.8232	6.4423	4.0603	3.279	2.9391	2.5681	1.1994	no	no	yes	NA	NA	NA	NA	Eukaryota
1	GRMZM2G521862			69.8466	93.4979	64.9216	41.2752	44.7429	42.4366	36.5047	49.0179	no	no	no	NA	NA	NA	NA	Magnoliophyta
1	GRMZM2G472226			1.6989	2.8908	2.4873	0.6743	1.0912	1.0746	0.9403	2.362	no	no	no	NA	NA	structural constituent of ribosome;intracellular;ribosome;translation	DUF1677_pln; Ribosomal_P2	Embryophyta
1	GRMZM2G319955			4.1018	4.97	6.1929	2.3049	3.3322	3.0896	2.9746	2.9022	no	no	no	NA	NA	NA	NA	Zea mays
1	GRMZM2G125867			18.0045	23.064	35.2634	7.9176	9.2224	12.479	7.7238	6.7089	no	no	no	ubiquitin-protein ligase/ zinc ion binding protein (LOC100280727), mRNA	ubiquitin-protein ligase/ zinc ion binding protein;ubiquitin-protein ligase/ zinc ion binding protein	protein binding;zinc ion binding;protein binding;zinc ion binding;protein binding;zinc ion binding	Znf_C6HC; Znf_RING; Znf_RING_CS	Viridiplantae
1	AC195587.4_FG004			0.8809	1.808	1.4538	0.9174	1.5032	0.8696	0.5238	0.6906	no	yes	no	NA	NA	nucleotide binding;ATP binding;apoptosis;defense response;nucleoside-triphosphatase activity	NB-ARC; ATPase_AAA+_core; Disease_R	Poaceae
1	GRMZM2G045005			63.7086	63.9317	51.5984	19.4909	21.3253	33.4863	19.6375	20.5782	no	no	yes	NA	NA	vasopressin receptor activity;G-protein coupled receptor protein signaling pathway;integral to membrane;homoiothermy;ice binding;response to freezing;vasopressin receptor activity;G-protein coupled receptor protein signaling pathway;integral to membrane;homoiothermy;ice binding;response to freezing;vasopressin receptor activity;G-protein coupled receptor protein signaling pathway;integral to memb…	Antifreeze_1	Embryophyta
1	GRMZM2G009346			22.0498	28.1366	35.818	16.977	18.6801	14.8304	10.5399	13.431	no	no	no	NA	hypothetical protein LOC100384319	NA	NA	Eukaryota
1	GRMZM2G030850			11.0435	17.5193	18.853	8.1938	8.2553	8.5776	12.8209	16.964	no	no	no	glucan endo-1,3-beta-glucosidase 7 (LOC100283556), mRNA	glucan endo-1,3-beta-glucosidase 7	hydrolase activity, hydrolyzing O-glycosyl compounds;carbohydrate metabolic process;hydrolase activity, hydrolyzing O-glycosyl compounds;carbohydrate metabolic process	Glyco_hydro_17; Glyco_hydro_catalytic_core	Embryophyta
1	GRMZM2G082964			1.9765	2.8985	3.3377	2.2956	2.7215	2.4548	1.1843	1.6574	no	no	no	NA	NA	NA	F-box_dom_cyclin-like; F-box_dom_Skp2-like; F-box-assoc_interact_dom	Magnoliophyta
1	GRMZM2G080501			5.9823	10.8752	7.9942	2.9642	2.6459	5.9619	5.0301	3.8951	no	no	no	LOC100192786 (pco111209), mRNA	LOC100192786	NA	Haem_Oase-like_multi-hlx	Embryophyta
1	GRMZM2G145390			18.4556	24.1752	31.201	18.1252	13.6184	15.4171	13.4105	15.3936	no	no	no	LOC100280154 (pco097656b), mRNA	LOC100280154	NA	NA	Embryophyta
1	GRMZM2G409265			26.3618	26.9702	22.0573	17.6734	19.3835	9.5268	6.3164	12.3673	no	no	no	hypothetical protein LOC100273607 (LOC100273607), mRNA;hypothetical protein LOC100384294 (LOC100384294), mRNA	hypothetical protein LOC100273607;hypothetical protein LOC100384294	steroid metabolic process;steroid metabolic process	NA	Eukaryota
1	AC225147.4_FG002			96.045	177.389	176.91	108.405	108.563	144.109	128.189	81.9837	no	no	yes	hypothetical protein LOC100192600 (LOC100192600), mRNA	hypothetical protein LOC100192600	structural constituent of ribosome;intracellular;ribosome;translation;small ribosomal subunit	Ribosomal_S12/S23; NA-bd_OB-fold-like; Ribosomal_S12_bac-type; Ribosomal_S23_euk/arc	Eukaryota
1	GRMZM2G044246			0.5588	0.8612	0.7015	0.2486	0.2123	0.3568	0.367	0.2349	no	no	no	NA	NA	nucleic acid binding	RRM_RNP1	Viridiplantae
1	GRMZM2G168829			1.4038	4.4268	5.7865	1.909	1.5371	2.5244	1.5137	0.7138	no	no	no	NA	NA	NA	Ubiquitin; Ubiquitin_subgroup	Eukaryota
1	GRMZM2G074427			1.502	1.2029	1.4266	0.8221	0.7138	0.7444	0.5558	1.1637	no	no	no	hypothetical protein LOC100272504 (LOC100272504), mRNA	hypothetical protein LOC100272504	nucleus;regulation of transcription;nucleus;regulation of transcription	AUX_IAA	Embryophyta
1	GRMZM2G020928			263.584	256.012	478.612	101.338	107.609	132.782	89.936	144.574	no	yes	yes	hypothetical protein LOC100191858 (LOC100191858), mRNA	hypothetical protein LOC100191858;hypothetical protein LOC100191858;hypothetical protein LOC100191858	nucleic acid binding;RNA binding;nucleus;zinc ion binding;nucleic acid binding;RNA binding;nucleus;zinc ion binding;nucleic acid binding;RNA binding;nucleus;zinc ion binding	Znf_CCCH; RRM_RNP1; RNA-recognition_dom1; U2_small	Eukaryota
1	AC194402.2_FG004			12.3266	19.018	18.6054	9.8493	11.3382	10.2427	4.2826	9.2688	no	no	no	NA	NA	NA	NA	NA
1	GRMZM2G075630			210.549	326.413	381.119	216.792	169.106	223.959	181.133	127.533	no	no	yes	NA	NA	structural constituent of ribosome;intracellular;ribosome;translation;translational elongation	Ribosomal_60S; Ribosomal_P2	Eukaryota
1	GRMZM2G423027			43.6721	55.0152	60.0505	33.4018	35.5965	35.6973	27.8278	30.7867	no	no	no	hypothetical protein LOC100272355 (LOC100272355), mRNA	hypothetical protein LOC100272355	protein-L-isoaspartate (D-aspartate) O-methyltransferase activity;protein modification process;methyltransferase activity;protein-L-isoaspartate (D-aspartate) O-methyltransferase activity;protein modification process;methyltransferase activity;protein-L-isoaspartate (D-aspartate) O-methyltransferase activity;protein modification process;protein-L-isoaspartate (D-aspartate) O-methyltransferase act…	PCMT; Small_mtfrase	Eukaryota
1	GRMZM2G169615			95.6695	78.2594	160.19	68.5871	69.8652	56.4509	45.8419	48.3995	no	no	no	LOC100191611 (cl866_1a), mRNA	LOC100191611	nucleic acid binding;nucleic acid binding	NA	Eukaryota
1	GRMZM2G001255			6.364	12.9165	14.9379	8.1065	7.9705	9.6172	7.5477	7.4129	no	no	yes	NA	NA	NA	CHP02058	Eukaryota
1	GRMZM2G012611			1.0323	1.283	1.4298	0.4469	0.6424	0.4854	0.2174	0.5934	no	no	no	hypothetical protein LOC100272425 (LOC100272425), mRNA;hypothetical protein LOC100272425 (LOC100272425), mRNA	hypothetical protein LOC100272425;hypothetical protein LOC100272425	NA	NA	Embryophyta
1	GRMZM2G060106			856.543	1070.1	1924.74	778.382	780.788	709.592	535.966	348.528	no	no	yes	NA	NA	NA	NA	NA
1	GRMZM5G816432			11.3781	11.8608	18.3782	11.8148	10.7801	10.4676	6.7682	3.5963	no	no	yes	LOC100286008 (si618042f05b), mRNA	LOC100286008	nucleoside metabolic process	PRibTrfase	Eukaryota
1	GRMZM2G083195			21.0946	32.8364	29.0263	17.1711	20.8263	22.4205	19.9187	28.7793	no	no	no	LOC100282930 (umc2266), mRNA	LOC100282930	metabolic process;acyltransferase activity	NA	Embryophyta
1	GRMZM5G886883			18.6313	16.6332	23.6717	14.6071	15.5761	14.0954	7.9963	11.8001	no	no	no	hypothetical protein LOC100278454 (LOC100278454), mRNA;hypothetical protein LOC100275432 (LOC100275432), mRNA	hypothetical protein LOC100278454;hypothetical protein LOC100275432	NA	NA	NA
1	GRMZM2G151923			125.519	173.883	211.615	116.621	112.418	154.979	110.073	116.865	no	no	no	LOC100282961 (pco131393), mRNA;LOC100282961 (pco131393), mRNA;LOC100282961 (pco131393), mRNA;LOC100282961 (pco131393), mRNA	LOC100282961;LOC100282961;LOC100282961;LOC100282961	nucleic acid binding;zinc ion binding;nucleic acid binding;zinc ion binding;nucleic acid binding;zinc ion binding;nucleic acid binding;zinc ion binding;nucleic acid binding;zinc ion binding	RRM_RNP1; Znf_CCHC	Eukaryota
1	GRMZM5G892426			21.9886	27.3687	30.6955	20.7734	20.7121	18.819	13.6193	20.6767	no	no	no	hypothetical protein LOC100277397 (LOC100277397), mRNA	hypothetical protein LOC100277397;hypothetical protein LOC100277397	NA	NA	Embryophyta
1	GRMZM2G151582			9.3384	10.7217	16.3074	8.8948	8.5874	8.951	4.8634	6.1348	no	no	yes	hypothetical protein LOC100277047 (LOC100277047), mRNA	hypothetical protein LOC100277047	NA	NA	Magnoliophyta
1	GRMZM2G166572			3.0662	4.4993	2.7831	1.8216	1.5739	1.526	1.116	0.8304	no	no	no	hypothetical protein LOC100275221 (LOC100275221), mRNA	hypothetical protein LOC100275221	NA	NA	Poaceae
1	GRMZM2G120951			7.5955	9.4004	10.8689	7.2684	6.144	8.966	4.2191	10.5138	no	no	yes	hypothetical protein LOC100384745 (LOC100384745), mRNA	hypothetical protein LOC100384745	structural constituent of ribosome;protein kinase activity;protein serine/threonine kinase activity;ATP binding;intracellular;ribosome;translation;protein amino acid phosphorylation	Kinase-like_dom; Tyr_Pkinase_cat_dom; Ser/Thr_prot_kinase_dom; Protein_kinase_ATP_BS; Ser/Thr_prot_kinase_AS; Ribosomal_P2	Eukaryota
1	GRMZM2G006329			8.9538	11.1151	10.7201	7.1706	8.1156	7.6896	4.9017	6.9956	no	no	no	PH domain containing protein (LOC100286185), mRNA	PH domain containing protein	iron ion binding;translation;peptide deformylase activity	Pleckstrin_homology; Fmet_deformylase	Embryophyta
1	GRMZM2G110309	ibp2	initiator-binding protein2	2.7904	3.9076	4.4346	2.4999	3.7304	3.412	1.9817	3.4348	no	no	no	NA	NA	DNA binding	Homeodomain-like; SANT_DNA-bd	Embryophyta
1	GRMZM2G101069			1.7665	3.3698	2.6606	0.1396	0.1086	1.6962	1.0567	0.3547	no	no	no	LOC100284551 (pco117429), mRNA	LOC100284551	glutamate decarboxylase activity;glutamate metabolic process;carboxy-lyase activity;carboxylic acid metabolic process;pyridoxal phosphate binding	PyrdxlP-dep_de-COase; PyrdxlP-dep_Trfase_major_dom; Glutamate_decarboxylase	Eukaryota
1	GRMZM2G143086			43.6765	62.4205	82.1119	40.6912	39.3492	57.8253	41.8136	32.1981	no	no	yes	NA	NA	NA	NA	Embryophyta
1	GRMZM2G065230			1.3411	1.5674	2.0999	0.7773	0.4581	0.7987	0.7751	0.6831	no	no	no	hypothetical protein LOC100279365 (LOC100279365), mRNA	hypothetical protein LOC100279365	membrane;membrane;membrane	NA	Embryophyta
1	GRMZM2G172956			76.8974	75.1577	78.5566	45.701	42.5036	50.4042	36.9763	40.8103	no	no	no	NA	NA	pseudouridine synthesis;RNA binding;RNA processing;RNA modification;pseudouridine synthase activity;pseudouridine synthesis;RNA binding;RNA processing;RNA modification;pseudouridine synthase activity	Dyskerin-like; PsdUridine_synth_TruB_N; PUA; PsdUridine_synth_cat_dom; PUA-like; H/ACA_rnp_Cbf5; Uncharacterised_dom_2	Eukaryota
1	GRMZM2G157855			3.8112	6.6403	7.282	4.3003	5.0705	5.2502	2.7339	3.4156	no	no	no	RHC1A (LOC100285755), mRNA	RHC1A	protein binding;zinc ion binding	Znf_C3HC4_RING-type; Znf_RING-CH; Znf_RING	Eukaryota
1	GRMZM2G135547			23.0751	25.7336	34.132	15.8011	16.3096	21.2658	14.1552	19.8256	no	no	no	hypothetical protein LOC100276868 (LOC100276868), mRNA	hypothetical protein LOC100276868;hypothetical protein LOC100276868;hypothetical protein LOC100276868	metabolic process;oxidoreductase activity;homoiothermy;ice binding;response to freezing;oxidation reduction;metabolic process;oxidoreductase activity;oxidation reduction;homoiothermy;ice binding;response to freezing;metabolic process;oxidoreductase activity;homoiothermy;ice binding;response to freezing;oxidation reduction;homoiothermy;ice binding;response to freezing	Antifreeze_1	Embryophyta
1	GRMZM2G075117			27.873	38.3002	45.7085	25.1275	24.7402	32.1989	23.9161	29.8936	no	no	no	LOC541915 (umc1775), mRNA;LOC732735 (gpm309), mRNA	LOC541915;LOC732735	somatostatin receptor activity;nucleus;G-protein coupled receptor protein signaling pathway;integral to membrane;homoiothermy;ice binding;response to freezing;nucleus;homoiothermy;ice binding;response to freezing	Cyclin_N; Cyclin_C; Cyclin-like; Cyclin; Antifreeze_1	Embryophyta
1	GRMZM2G169648			61.2774	55.6337	86.8011	50.365	53.2841	45.7101	31.8429	29.4016	no	no	no	LOC100273977 (pco136451a), mRNA	LOC100273977	telomere maintenance;nuclear chromosome, telomeric region;DNA binding;telomere maintenance;nuclear chromosome, telomeric region;DNA binding	Telomer_end-bd; NA-bd_OB-fold-like	Embryophyta
1	GRMZM5G827798			0.5823	0.7985	0.6069	0.3489	0.5175	0.7051	0.1906	0.2506	no	no	no	NA	NA	DNA binding;catalytic activity;5'-3' exonuclease activity	5-3_exonucl_a-hlix_arch_N; 5-3_exonuclease_C; 5-3_exonuclease_N; HhH2	Embryophyta
1	GRMZM2G008607			9.6192	8.7077	8.0164	6.5247	6.0798	4.6129	4.4064	3.3809	no	no	no	hypothetical protein LOC100276862 (LOC100276862), mRNA	hypothetical protein LOC100276862	NA	NA	Viridiplantae
1	GRMZM2G450937			53.8569	71.6814	71.978	56.7938	53.1957	68.0979	49.5656	58.7155	no	no	no	60S ribosomal protein L19-3 (LOC100284115), mRNA	60S ribosomal protein L19-3;60S ribosomal protein L19-3;60S ribosomal protein L19-3	structural constituent of ribosome;intracellular;ribosome;translation;nucleosome;DNA binding;structural constituent of ribosome;intracellular;ribosome;nucleosome assembly;translation;nucleosome;DNA binding;structural constituent of ribosome;intracellular;ribosome;nucleosome assembly;translation;nucleosome;DNA binding;structural constituent of ribosome;intracellular;ribosome;nucleosome assembly;tr…	Ribosomal_L19/L19e; LRR-contain_N2; Leu-rich_rpt; Leu-rich_rpt_typical-subtyp; Disease_R	Tracheophyta
1	GRMZM2G060834			50.9515	67.2756	68.1654	34.1808	22.2933	30.9553	40.6486	31.0528	yes	no	no	hypothetical protein LOC100194380 (LOC100194380), mRNA	hypothetical protein LOC100194380	NA	Myb_DNA-bd; Homeodomain-like; Myb-like+DNA-bd_dom_SHAQKYF	Embryophyta
1	GRMZM2G540772			0.8771	0.8571	0.9879	0.6946	0.7984	0.9581	0.4602	0.3182	no	no	no	NA	NA	protein kinase activity;protein serine/threonine kinase activity;ATP binding;protein amino acid phosphorylation	Se/Thr_prot_kinase-like_dom; Ser-Thr/Tyr-Pkinase; Kinase-like_dom; Tyr_Pkinase_cat_dom; Ser/Thr_prot_kinase_dom; Protein_kinase_ATP_BS	Eukaryota
1	GRMZM2G158568			465.903	673.763	813.674	423.267	358.685	598.303	427.737	290.579	no	no	yes	60S ribosomal protein L31 (LOC100286120), mRNA	60S ribosomal protein L31	structural constituent of ribosome;intracellular;ribosome;translation	NA	Eukaryota
1	GRMZM2G110952			84.5888	124.391	113.601	81.5627	82.8387	111.818	72.6043	56.7758	no	no	yes	hypothetical protein LOC100192040 (LOC100192040), mRNA;PHD finger protein (LOC100283422), mRNA;hypothetical protein LOC100192600 (LOC100192600), mRNA	PHD finger protein;hypothetical protein LOC100192040;PHD finger protein;hypothetical protein LOC100192600	structural constituent of ribosome;protein binding;intracellular;ribosome;translation;zinc ion binding;small ribosomal subunit;protein binding;zinc ion binding;structural constituent of ribosome;intracellular;ribosome;translation;small ribosomal subunit	Ribosomal_S12/S23; NA-bd_OB-fold-like; Ribosomal_S12_bac-type; Ribosomal_S23_euk/arc	Magnoliophyta
1	GRMZM2G163811			4.2999	10.3087	7.6941	6.1543	5.9751	5.2691	4.5609	2.657	no	no	yes	NA	NA	NA	NA	NA
1	AC212898.2_FG006			10.5323	10.673	12.3173	6.4918	11.256	5.6958	3.6755	5.2882	no	no	no	NA	NA	NA	NA	NA
1	GRMZM2G007489			48.4892	60.9939	62.2356	37.1927	42.109	45.0247	26.9254	39.2646	no	no	no	LOC100283590 (cl525_1a), mRNA	LOC100283590	NA	Acyl-ACP_thioesterase	Viridiplantae
1	GRMZM2G457370			0.2673	0.4671	0.4794	0.3372	0.348	0.5583	0.183	0.1423	no	no	no	LOC100279313 (cl909_1), mRNA	LOC100279313;LOC100279313	nucleic acid binding;nucleic acid binding;nucleic acid binding	Piwi; PolynucTfrase_RNaseH_fold	Embryophyta
1	GRMZM2G103909			26.2179	33.2249	41.2189	26.4975	27.1223	35.6413	21.0832	24.2938	no	no	no	fiber protein Fb2 (LOC100284110), mRNA	fiber protein Fb2	NA	Di19_RING_finger_144	Embryophyta
1	GRMZM2G140646			1.9068	1.004	2.6361	0.4302	0.383	0.6128	1.062	0.3354	no	no	no	hypothetical protein LOC100276183 (LOC100276183), mRNA	hypothetical protein LOC100276183	NA	Bifunc_inhib/LTP/seed_store	Poaceae
1	GRMZM2G001660			30.3883	51.4257	79.6776	27.1144	28.6619	16.6557	22.0803	18.7771	no	no	no	NA	NA	NA	VWF_C	Magnoliophyta
1	GRMZM2G177781			141.651	162.951	222.813	97.779	110.903	68.005	44.1259	61.6588	no	no	no	hypothetical protein LOC100191655 (LOC100191655), mRNA	hypothetical protein LOC100191655;hypothetical protein LOC100191655	RNA binding;nutrient reservoir activity;RNA binding;nutrient reservoir activity;nutrient reservoir activity	Pericardin-like_rpt; Glutenin	Eukaryota
1	GRMZM2G051753			8.7904	7.902	11.0555	3.831	3.2481	3.118	2.3989	2.8995	no	no	no	boron transporter-like protein 2 (LOC100281408), mRNA	boron transporter-like protein 2	inorganic anion exchanger activity;anion transport;anion exchanger activity;membrane;integral to membrane;oxidoreductase activity;oxidation reduction;inorganic anion exchanger activity;anion transport;anion exchanger activity;membrane;integral to membrane;oxidoreductase activity;oxidation reduction	HCO3_transpt_C; HCO3_transpt_euk; Cyt_b245_heavy_chain	Eukaryota
1	GRMZM2G376085			3.4484	7.0114	5.8572	5.0299	5.5302	5.1815	2.9474	2.8626	no	no	no	NA	NA	ubiquitin ligase complex;ubiquitin-protein ligase activity;binding;protein ubiquitination	Ubox_domain; Armadillo; ARM-type_fold	Embryophyta
1	GRMZM2G129954			9.4914	11.267	8.9675	5.2911	6.6015	8.2195	3.3607	3.8231	no	no	no	LOC541632 (gpm91), mRNA	LOC541632	two-component response regulator activity;two-component signal transduction system (phosphorelay);regulation of transcription, DNA-dependent	CheY-like	Embryophyta
1	GRMZM2G554314			2.2713	2.0552	3.2599	0.4453	0.5273	0.8944	0.3065	0.3546	no	no	no	NA	NA	NA	NA	NA
1	GRMZM2G090061			21.2299	33.9914	37.0235	18.4415	17.3649	15.6849	14.4197	9.9736	no	no	yes	NA	NA	NA	NA	Embryophyta
1	GRMZM2G105364			197.301	396.511	315.859	172.638	179.105	217.564	183.43	114.533	no	no	yes	GAST1 protein (LOC100282417), mRNA	GAST1 protein	NA	GASA	Tracheophyta
1	GRMZM2G161932			6.5521	5.2873	8.0711	4.2872	4.6086	3.6243	3.1974	3.0635	no	no	no	hypothetical protein LOC100216947 (LOC100216947), mRNA	hypothetical protein LOC100216947;hypothetical protein LOC100216947	NA	NA	Viridiplantae
1	GRMZM2G029951			14.9194	18.5695	18.6114	13.0111	14.659	9.2621	6.5354	8.1781	no	no	no	NA	NA	catalytic activity;copper-exporting ATPase activity;ATP binding;ATP biosynthetic process;metabolic process;ATPase activity, coupled to transmembrane movement of ions, phosphorylative mechanism;membrane;integral to membrane;hydrolase activity, acting on acid anhydrides, catalyzing transmembrane movement of substances;metal ion transport;metal ion binding;metal ion transmembrane transporter activity	HeavyMe_transpt; ATPase_P-typ_ATPase-assoc-dom; Dehalogen-like_hydro; ATPase_P-typ_ion-transptr; ATPase_P-typ_H-transp; ATPase_P-typ_cat/Cu-transptr; ATPase_P-typ_P_site; Heavy-metal-associated_CS; ATPase_P-typ_heavy-metal	Eukaryota
1	GRMZM2G437575			14.9127	15.9554	20.337	9.0302	12.2747	12.5261	8.5447	15.1542	no	no	no	NA	NA	catalytic activity	PP2C-related	Eukaryota
1	GRMZM2G157010			6.4676	8.2277	11.0812	5.694	6.778	9.32	4.5512	4.6954	no	no	yes	LOC100279965 (cl12107_1), mRNA	LOC100279965	NA	UPF0029_Impact_N; Ribosomal_S5_D2-typ_fold; Elongation_fac_G/III/V	Viridiplantae
1	GRMZM2G165044			35.0568	25.2389	43.4022	14.8799	9.0502	9.8249	10.4547	14.767	no	no	no	NA	NA	protein binding;zinc ion binding;protein binding;zinc ion binding	Znf_C3HC4_RING-type; Znf_RING-CH; Znf_RING	Viridiplantae
1	GRMZM2G410479			33.3072	30.8402	47.3137	27.7988	31.029	9.0154	7.5057	13.5663	no	no	no	NA	NA	nucleotide binding;nucleoside-triphosphatase activity	ATPase_AAA+_core	Eukaryota
1	GRMZM2G155806			1.7868	1.231	3.2178	0.7199	0.5354	0.5404	0.5585	0.4201	no	no	no	NA	NA	RNA binding;binding	Pumilio_RNA-bd_rpt; ARM-type_fold	Eukaryota
1	GRMZM2G052341			36.4618	50.9551	59.7158	39.0488	41.0529	35.6829	25.118	28.7468	no	no	no	NA	NA	nucleic acid binding	NA	Eukaryota
1	GRMZM2G017426			14.5523	18.9977	19.2314	11.5573	16.1312	10.9909	7.5508	12.6903	no	no	no	hypothetical protein LOC100304309 (LOC100304309), mRNA	hypothetical protein LOC100304309	NA	NA	Embryophyta
1	GRMZM2G115925			69.4733	111.913	145.928	79.4168	90.4233	71.5612	61.2905	41.3174	no	no	yes	small nuclear ribonucleoprotein Sm D3 (LOC100284316), mRNA	small nuclear ribonucleoprotein Sm D3	NA	LSM_domain; LSM_related_domain; LSM_domain_euk/arc	Eukaryota
1	GRMZM2G150521			196.618	242.832	415.405	137.138	139.09	163.011	87.173	84.3926	no	no	no	LOC100191146 (cl10007_1b), mRNA;glycine-rich RNA-binding protein 7 (LOC100283403), mRNA	LOC100191146;glycine-rich RNA-binding protein 7	nucleic acid binding;membrane;protein homooligomerization	RRM_RNP1; RNA-recognition_dom1; Prion	Eukaryota
1	GRMZM2G422210			9.4757	15.3766	16.1576	8.8939	12.2496	12.3265	7.58	5.0703	no	no	no	hypothetical protein LOC100280255 (LOC100280255), mRNA;hypothetical protein LOC100303973 (LOC100303973), mRNA	hypothetical protein LOC100280255;hypothetical protein LOC100280255	NA	NA	NA
1	GRMZM2G429899	sh2	shrunken2	0.4392	0.473	0.5603	0.3752	0.5627	0.4149	0.1998	0.1291	no	no	no	shrunken-2 locus (Sh2), mRNA	shrunken-2 locus	glycogen biosynthetic process;glucose-1-phosphate adenylyltransferase activity;biosynthetic process;nucleotidyltransferase activity;glycogen biosynthetic process;biosynthetic process;nucleotidyltransferase activity;glycogen biosynthetic process	ADP_Glu_pyroP_CS	Viridiplantae
1	GRMZM2G035701			13.7008	15.7157	18.8921	1.5225	0.5208	4.4089	2.747	0.4168	no	no	no	NA	NA	DNA binding;regulation of transcription, DNA-dependent	TF_B3	Viridiplantae
1	GRMZM2G154048			18.779	27.2776	27.4217	10.2543	8.5898	17.3232	15.1202	6.631	no	no	no	NA	NA	NA	NA	Zea mays
1	GRMZM2G124203			23.8885	28.9203	28.625	21.0871	28.9569	20.06	20.3797	15.0296	no	no	no	threonine endopeptidase (LOC100284177), mRNA	threonine endopeptidase;threonine endopeptidase	NA	NA	Viridiplantae
1	GRMZM2G073884			0.838	0.6264	1.2485	0.4265	0.2034	0.2035	0.0996	0.1492	no	no	no	hypothetical protein LOC100279719 (LOC100279719), mRNA	hypothetical protein LOC100279719	protein kinase activity;protein serine/threonine kinase activity;protein binding;ATP binding;protein amino acid phosphorylation	Leu-rich_rpt; Se/Thr_prot_kinase-like_dom; Ser-Thr/Tyr-Pkinase; Kinase-like_dom; Leu-rich_rpt_typical-subtyp; Tyr_Pkinase_cat_dom; Ser/Thr_prot_kinase_dom; Ser/Thr_prot_kinase_AS	Poaceae
1	GRMZM2G107163			28.9106	23.8281	28.0043	15.0523	18.0758	20.5366	11.6338	19.7027	yes	no	no	NA	NA	nucleic acid binding;membrane;protein homooligomerization	RRM_RNP1; Prion	Embryophyta
1	GRMZM2G066293			6.2821	9.7055	10.2277	6.7142	8.0126	7.5084	4.772	6.6033	no	no	no	ATPase (LOC100283486), mRNA	ATPase	NA	ATPase_BadF	Eukaryota
1	GRMZM2G352756			35.2987	37.0928	45.8739	31.8523	30.8074	27.3809	20.9991	23.957	no	no	no	hypothetical protein LOC100275729 (LOC100275729), mRNA	hypothetical protein LOC100275729;hypothetical protein LOC100275729;hypothetical protein LOC100275729;hypothetical protein LOC100275729;hypothetical protein LOC100275729;hypothetical protein LOC100275729;hypothetical protein LOC100275729;hypothetical protein LOC100275729;hypothetical protein LOC100275729;hypothetical protein LOC100275729	metabolic process;oxidoreductase activity;oxidation reduction;metabolic process;oxidoreductase activity;oxidation reduction;metabolic process;oxidoreductase activity;oxidation reduction;metabolic process;oxidoreductase activity;oxidation reduction;metabolic process;oxidoreductase activity;oxidation reduction;metabolic process;oxidoreductase activity;oxidation reduction;metabolic process;oxidoredu…	NA	NA
1	GRMZM2G061078			30.649	37.0112	50.1243	30.4641	30.4401	30.3865	20.6108	20.3134	no	no	no	hypothetical protein LOC100273235 (LOC100273235), mRNA	hypothetical protein LOC100273235;hypothetical protein LOC100273235	structural constituent of cell wall;structural constituent of cell wall;structural constituent of cell wall;structural constituent of cell wall	TB2_DP1_HVA22	Eukaryota
1	GRMZM2G339151			91.7806	64.0935	96.8459	65.0968	62.8934	36.6793	26.075	42.943	no	no	no	NA	NA	ubiquitin ligase complex;ubiquitin-protein ligase activity;protein binding;zinc ion binding;protein ubiquitination	Znf_C3HC4_RING-type; SRA_YDG; Znf_FYVE_PHD; Znf_PHD; Znf_RING; Ubox_domain; Znf_RING_CS; Zinc_finger_PHD-type_CS	Eukaryota
1	GRMZM5G868679			5.4728	7.0595	8.2883	5.1273	6.5266	7.6667	3.8771	3.4869	no	no	no	LOC100217141 (si486101g07), mRNA	LOC100217141	acid phosphatase activity;hydrolase activity;metal ion binding	Metallo-dependent_phosphatase; Purple_acid_Pase-like_N	Eukaryota
1	GRMZM2G069405			55.5846	59.062	94.7792	39.2267	42.1101	39.1641	26.9309	24.501	no	no	no	RNA-binding protein-like (LOC100284724), mRNA	RNA-binding protein-like	nucleic acid binding;intracellular;transport;nucleic acid binding;intracellular;transport	NTF2; RRM_RNP1	Eukaryota
1	GRMZM2G166695			1.3686	2.247	2.4497	1.7741	1.5031	1.2523	0.5778	1.581	no	no	no	NA	NA	NA	Remorin_C	Magnoliophyta
1	GRMZM2G141799			21.6309	29.3627	31.1619	20.6499	20.6923	27.2161	20.905	24.4861	no	no	no	LOC100282692 (AY110052), mRNA	LOC100282692	metabolic process;2,3-dihydro-2,3-dihydroxybenzoate dehydrogenase activity;enterobactin biosynthetic process;oxidoreductase activity;oxidation reduction	DH_sc/Rdtase_SDR; PKS_KR; Glc/ribitol_DH; DHB_DH; Sc_DH/Rdtase_CS	Eukaryota
1	GRMZM2G034342			16.525	21.7186	28.268	16.3478	20.4328	16.1277	9.3235	13.3997	no	no	no	LOC100276536 (cl19671_1), mRNA	LOC100276536	NA	NA	Magnoliophyta
1	GRMZM5G803802			9.1973	11.3498	10.226	5.5641	8.7787	4.399	3.7472	6.0246	no	no	no	NA	hypothetical protein LOC100279758	NA	NA	Zea mays
1	GRMZM2G124563			33.0083	31.8251	38.0952	23.9396	21.9881	27.8936	21.4542	22.2762	no	no	no	chloroplast channel forming outer membrane protein (LOC100283308), mRNA	chloroplast channel forming outer membrane protein	cell adhesion;cell recognition;viral infectious cycle	Adeno_fibre	Embryophyta
1	GRMZM2G009519			51.7866	66.0019	72.1267	46.215	48.0364	40.9342	38.307	41.8494	no	no	no	hypothetical protein LOC100193969 (LOC100193969), mRNA	hypothetical protein LOC100193969;hypothetical protein LOC100193969;hypothetical protein LOC100193969	cobalamin biosynthetic process;lyase activity;metal ion binding;cobalamin biosynthetic process;lyase activity;metal ion binding;cobalamin biosynthetic process;lyase activity;metal ion binding;cobalamin biosynthetic process;lyase activity;metal ion binding	Cbl_biosynth_CbiX	NA
1	GRMZM2G365282			1.658	1.1903	1.8937	0.2786	0.3612	1.1366	0.5917	0.1297	no	no	no	NA	NA	protein kinase activity;protein serine/threonine kinase activity;ATP binding;protein amino acid phosphorylation	DUF26; Ser-Thr/Tyr-Pkinase; Kinase-like_dom; Tyr_Pkinase_cat_dom; Ser/Thr_prot_kinase_dom; Ser/Thr_prot_kinase_AS	Magnoliophyta
1	GRMZM2G140339			6.5718	9.1764	12.0617	5.5005	5.0193	8.8119	4.2596	4.3057	no	no	yes	NA	NA	RNA binding;nucleus;RNA processing;ribonucleoprotein complex	Lupus_La_RNA-bd; Lupus_La	Eukaryota
1	GRMZM2G139066			13.2814	15.5241	12.7095	7.5235	8.0018	11.7979	7.95	9.6344	no	no	no	F-box domain containing protein (LOC100284935), mRNA	F-box domain containing protein	NA	F-box_dom_cyclin-like; F-box_dom_Skp2-like	Embryophyta
1	GRMZM2G398500			6.0501	10.0214	9.0396	6.1515	9.6318	6.5598	5.3749	6.9673	no	no	no	LOC100193367 (IDP290), mRNA	LOC100193367	catalytic activity;metabolic process	Crotonase_core; Enoyl-CoA_hyd/isom_CS	Eukaryota
1	GRMZM2G063042			1.6341	2.2467	2.6981	1.2194	1.4832	1.7571	1.3153	1.47	no	no	no	NA	NA	metabolic process;transferase activity, transferring hexosyl groups	UDP_glucos_trans	Magnoliophyta
1	GRMZM2G086401			1.2963	1.4642	1.3994	0.8907	0.5125	0.2655	0.9526	0.1931	no	no	no	NA	NA	G-protein coupled receptor protein signaling pathway;integral to membrane	WD40_repeat_sg; Ribosomal_S5_D2-typ_fold; WD40_repeat-like_dom; WD40_repeat; 7TM_GPCR_Rhodpsn	Eukaryota
1	GRMZM2G006042			55.6615	69.6016	76.7629	59.8055	65.9443	59.502	28.2246	33.842	no	no	no	hypothetical protein LOC100383196 (LOC100383196), mRNA	hypothetical protein LOC100383196;hypothetical protein LOC100383196	DNA binding;nucleus;regulation of transcription, DNA-dependent;cellular amino acid metabolic process;response to hormone stimulus;pyridoxal phosphate binding;regulation of transcription;DNA binding;nucleus;regulation of transcription, DNA-dependent;cellular amino acid metabolic process;response to hormone stimulus;pyridoxal phosphate binding;regulation of transcription;DNA binding;nucleus;regulat…	TF_B3; Auxin_resp; Ser/Thr_deHydtase_PyrdxlP-BS; K_chnl_volt-dep_Kv1.4	Embryophyta
1	GRMZM2G016323			129.807	154.955	180.15	111.325	128.325	77.9348	50.237	91.1772	no	no	no	NA	NA	ubiquitin thiolesterase activity;ubiquitin-dependent protein catabolic process	NA	Eukaryota
1	GRMZM2G014720			31.9561	54.2128	70.51	32.017	25.4477	47.0169	32.2752	25.5675	no	no	no	hypothetical protein LOC100273657 (LOC100273657), mRNA	hypothetical protein LOC100273657	protein binding;apoptosis	Apoptosis_reg_Bcl-2_prot_BAG; Ubiquitin	Embryophyta
1	GRMZM2G019363			243.107	134.191	333.958	16.2523	15.1066	157.192	103.565	9.0963	no	no	no	hypothetical protein LOC100272861 (LOC100272861), mRNA	hypothetical protein LOC100272861	NA	CHP00730	Eukaryota
1	GRMZM2G417402			21.3677	23.9315	37.4386	12.7356	12.9311	9.8327	6.2617	6.1731	no	no	no	NA	NA	nucleic acid binding;intracellular;zinc ion binding	Znf_U1; Znf_C2H2-like	Poaceae
1	GRMZM2G121573			6.6841	7.8078	7.4858	4.5789	6.0009	3.9159	2.9004	2.9985	no	no	no	NA	NA	protein kinase activity;protein serine/threonine kinase activity;protein binding;ATP binding;protein amino acid phosphorylation;protein kinase activity;protein serine/threonine kinase activity;protein binding;ATP binding;protein amino acid phosphorylation	LRR-contain_N2; Leu-rich_rpt; Se/Thr_prot_kinase-like_dom; Ser-Thr/Tyr-Pkinase; Kinase-like_dom; Tyr_Pkinase_cat_dom; Ser/Thr_prot_kinase_dom	Embryophyta
1	GRMZM2G165488			24.6366	22.958	30.2448	15.6409	17.3537	16.5994	14.8633	9.7977	no	no	no	hypothetical protein LOC100193094 (LOC100193094), mRNA	hypothetical protein LOC100193094	transcription factor activity;nucleus;regulation of transcription, DNA-dependent;transcription factor activity;nucleus;regulation of transcription, DNA-dependent;transcription factor activity;nucleus;regulation of transcription, DNA-dependent;transcription factor activity;nucleus;regulation of transcription, DNA-dependent	TF_CBFB	Eukaryota
1	GRMZM2G056750			1.2791	0.9693	2.3409	0.2329	0.4693	0.6331	0.2491	0.3029	no	no	no	NA	NA	NA	NA	Embryophyta
1	GRMZM2G158153			136.815	150.376	231.42	108.245	103.908	77.2278	50.5097	84.0412	no	no	no	hypothetical protein LOC100193964 (LOC100193964), mRNA	hypothetical protein LOC100193964	RNA binding;RNA binding;fusion of sperm to egg plasma membrane;nutrient reservoir activity	MTG8; Bindin; Glutenin	Eukaryota
1	GRMZM5G818643			11.4696	13.5455	10.6645	6.4476	5.8388	6.6509	4.9328	5.0522	no	no	no	hypothetical protein LOC100383089 (LOC100383089), mRNA	hypothetical protein LOC100383089	nucleus;transcription regulator activity;regulation of transcription;nucleus;transcription regulator activity;regulation of transcription	HLH_DNA-bd_dom; HLH_DNA-bd	Embryophyta
1	GRMZM2G099231			9.8779	10.824	9.2719	8.6231	7.6135	6.019	2.4819	6.8363	no	no	no	NA	NA	nucleic acid binding;NAD+ ADP-ribosyltransferase activity;protein amino acid ADP-ribosylation	SAP_DNA-bd; WGR; Poly(ADP-ribose)pol_reg_dom	Eukaryota
1	GRMZM2G319634			15.4595	17.271	21.2123	7.5902	9.3553	14.7018	7.1171	11.7594	no	no	no	NA	NA	catalytic activity;metabolic process;transferase activity, transferring acyl groups other than amino-acyl groups	Thiolase_C; Thiolase-like	Eukaryota
1	GRMZM2G130912			3.6593	4.829	4.872	1.642	1.882	3.1295	2.1794	1.5629	no	no	no	NA	NA	NA	NA	NA
1	AC214350.3_FG007			45.5646	77.2334	98.6282	46.3858	51.5667	64.5677	44.9608	40.5479	no	no	yes	hypothetical protein LOC100192468 (LOC100192468), mRNA	hypothetical protein LOC100192468	ubiquinol-cytochrome-c reductase activity;membrane;oxidoreductase activity;2 iron, 2 sulfur cluster binding;oxidation reduction	Ubiquinol_cyt_Rdtase_TM; Rieske_2Fe-2S; Rieske_Fe-S_prot_C; Ubiquinol_cyt_c_Rdtase_Fe-S-su	Eukaryota
1	GRMZM2G531804			1.8487	2.7972	3.6938	1.0456	1.8792	2.6561	1.268	0.84	no	no	no	NA	NA	NA	NA	NA
1	GRMZM2G175447			40.7864	45.1938	57.7576	34.8406	36.9357	40.0397	39.013	37.7488	no	no	no	NA	NA	NA	NA	Magnoliophyta
1	GRMZM2G118714			6.5708	7.5186	9.3656	5.5281	7.3066	3.1171	2.6654	4.222	no	no	no	NA	NA	NA	NA	Embryophyta
1	GRMZM2G370715			61.2111	52.3086	54.111	32.666	38.9784	18.5514	8.8166	16.5323	no	no	no	NA	NA	NA	Translation_prot_SH3-like; KOW	Eukaryota
1	GRMZM2G165011			9.2096	9.7601	10.6519	6.5973	5.2427	8.8275	4.7269	7.2756	no	no	no	hypothetical protein LOC100382441 (LOC100382441), mRNA	hypothetical protein LOC100382441	nucleus;zinc ion binding;chromatin modification;histone-lysine N-methyltransferase activity	SRA_YDG; Pre-SET_dom; SET_dom; Pre-SET_Zn-bd_sub	Embryophyta
1	GRMZM2G030971			0.3709	2.2227	1.1728	0.4254	0.3594	0.1103	0.2292	0.2595	no	no	no	NA	NA	NA	NA	Eukaryota
1	GRMZM2G353125			2.0632	1.743	1.8387	1.6465	1.5192	1.3357	0.6612	1.2204	no	no	no	LOC100280061 (cl16369_1a), mRNA	hypothetical protein LOC100384217;hypothetical protein LOC100384217;hypothetical protein LOC100384217	fructose-bisphosphate aldolase activity;glycolysis;zinc ion binding;fructose-bisphosphate aldolase activity;glycolysis;zinc ion binding;fructose-bisphosphate aldolase activity;glycolysis;zinc ion binding	Ketose_bisP_aldolase_II	Poaceae
1	GRMZM2G385543			17.3314	18.941	24.2143	9.3683	10.58	12.0232	7.4953	3.792	yes	yes	yes	NA	NA	nucleus;transcription regulator activity;regulation of transcription	HLH_DNA-bd_dom; HLH_DNA-bd	Embryophyta
1	GRMZM2G002863			0.8684	1.1545	1.4719	0.8606	0.6657	0.91	0.3969	0.479	no	no	no	NA	NA	NA	Pentatricopeptide_repeat	Embryophyta
1	AC204931.3_FG002			4.8698	3.4072	5.5884	1.217	3.1578	0.5202	1.2597	0.8022	no	no	no	hypothetical protein LOC100382824 (LOC100382824), mRNA	hypothetical protein LOC100382824	NA	NA	Zea mays
1	GRMZM2G056573			14.6706	17.8199	18.1339	14.3198	15.2782	6.1243	4.4962	7.3056	no	no	no	LOC100281658 (cl27593_1), mRNA	LOC100281658	NA	YTH_domain	Eukaryota
1	GRMZM2G163861			14.8243	21.7368	25.9405	16.4579	18.5196	9.1876	8.3099	10.5678	no	no	no	hypothetical protein LOC100191429 (LOC100191429), mRNA	hypothetical protein LOC100191429	protein kinase activity;protein serine/threonine kinase activity;MAP kinase activity;ATP binding;protein amino acid phosphorylation;protein kinase activity;protein serine/threonine kinase activity;MAP kinase activity;ATP binding;protein amino acid phosphorylation	NA	Viridiplantae
1	GRMZM2G038640			2.5722	4.8968	7.0533	3.1955	2.8826	3.1003	2.6844	1.356	no	yes	yes	NA	NA	NA	NA	Embryophyta
1	GRMZM2G172710			37.2551	45.692	38.5686	23.4593	22.5782	29.7203	24.7093	18.691	no	no	no	NA	NA	histamine receptor activity;G-protein coupled receptor protein signaling pathway;integral to membrane	Histamine_H3_recept	Magnoliophyta
1	GRMZM2G552322			42.1806	51.9578	78.8308	29.4087	35.4927	36.599	22.6719	32.6021	no	no	no	LOC100280059 (pco096192), mRNA	LOC100280059;LOC100280059	metabolic process;oxidoreductase activity;oxidation reduction;metabolic process;oxidoreductase activity;oxidation reduction	Ald_DH_CS	Embryophyta
1	GRMZM2G134957			177.301	246.524	254.119	143.266	130.054	142.215	139.381	130.915	yes	yes	yes	electron transporter/ thiol-disulfide exchange intermediate (LOC100285055), mRNA	electron transporter/ thiol-disulfide exchange intermediate	electron carrier activity;protein disulfide oxidoreductase activity;cell redox homeostasis	NA	Eukaryota
1	GRMZM5G800344			3.3806	3.8882	4.6519	2.3935	2.5954	3.7476	2.1918	2.0427	yes	no	no	proline synthetase-like protein (LOC100286142), mRNA	proline synthetase-like protein	NA	Ala_racemase_N; Prd-pyrdxlP-dep_enz_YBL036C	NA
1	GRMZM2G075505			45.0031	50.0745	69.1942	40.2827	38.5129	40.9148	24.731	31.0353	no	no	no	hypothetical protein LOC100194264 (LOC100194264), mRNA	hypothetical protein LOC100194264	nucleic acid binding	DNA/RNA-bd_Alba-like	Eukaryota
1	GRMZM2G124421			22.5018	31.2169	47.575	23.3061	26.2404	20.4593	12.8745	15.0043	no	no	yes	hypothetical protein LOC100217109 (LOC100217109), mRNA	hypothetical protein LOC100217109	DNA binding;intracellular;sequence-specific DNA binding	Histone_core_D; CBFA_NFYB_domain; Histone-fold	Eukaryota
1	GRMZM2G095252			61.2918	70.1758	88.187	62.2798	63.1091	45.4556	37.8781	40.7848	no	no	no	NA	NA	protein binding;ATP binding;cytoplasm;protein folding;cellular protein metabolic process;protein binding;ATP binding;cytoplasm;protein folding;cellular protein metabolic process	Cpn60/TCP-1; Chaperonin_Cpn60_CS	Eukaryota
1	GRMZM5G858599			3.5365	5.7906	8.1802	3.3532	3.5929	1.2297	4.5999	1.8182	no	no	no	NA	NA	histamine receptor activity;G-protein coupled receptor protein signaling pathway;integral to membrane	Histamine_H3_recept	NA
1	GRMZM2G070239			86.3265	91.2266	127.41	67.5107	66.2022	58.4135	34.7017	40.3962	no	no	no	LOC100280612 (pco118328a), mRNA	LOC100280612;LOC100280612	nucleic acid binding;zinc ion binding;nucleic acid binding;zinc ion binding;nucleic acid binding;zinc ion binding;nucleic acid binding;zinc ion binding;nucleic acid binding;zinc ion binding	Znf_CCHC; RRM_RNP1	Eukaryota
1	GRMZM5G899308			3.4871	3.1147	3.9553	1.3531	1.6443	3.1088	1.9894	0.7171	no	no	no	hypothetical protein LOC100384155 (LOC100384155), mRNA	hypothetical protein LOC100384155	NA	NA	NA
1	GRMZM2G040320			37.6878	47.4341	77.1914	36.7987	36.5723	28.2344	21.0392	29.0769	no	no	no	hypothetical protein LOC100276260 (LOC100276260), mRNA	hypothetical protein LOC100276260	NA	NA	Embryophyta
1	GRMZM2G147884			115.882	128.236	209.872	103.069	95.8064	56.1257	32.9303	38.3808	no	no	no	hypothetical protein LOC100274944 (LOC100274944), mRNA;hypothetical protein LOC100383438 (LOC100383438), mRNA	hypothetical protein LOC100383438;hypothetical protein LOC100383438	copper ion binding;ATP binding;amine oxidase activity;amine metabolic process;quinone binding;oxidation reduction;copper ion binding;ATP binding;amine oxidase activity;amine metabolic process;quinone binding;oxidation reduction;copper ion binding;amine oxidase activity;amine metabolic process;quinone binding;oxidation reduction	Cu_amine_oxidase_N2; Cu_amine_oxidase_N3; Cu_amine_oxidase_C; Cu_amine_oxidase_N-reg	Eukaryota
1	GRMZM2G161004			4.4278	3.4995	4.3501	2.7177	1.9643	3.1625	1.9563	3.9163	yes	no	no	hypothetical protein LOC100191767 (LOC100191767), mRNA	hypothetical protein LOC100191767;hypothetical protein LOC100191767;hypothetical protein LOC100191767	nucleic acid binding;intracellular;nucleic acid binding;intracellular;nucleic acid binding;intracellular	G_patch	Eukaryota
1	GRMZM2G342539			44.0424	61.7153	68.5674	47.9087	52.9228	32.7289	29.2067	24.9209	no	no	no	fiber protein Fb34 (LOC100282386), mRNA	fiber protein Fb34	NA	DUF1218	Embryophyta
1	GRMZM2G124863			7.1732	14.3009	12.9497	6.1338	5.575	9.3704	6.7441	10.1866	no	no	no	LOC100191169 (TIDP3506), mRNA	LOC100191169	folic acid binding;metabolic process;transferase activity	Formiminotransferase_N; FormiminoTrfase_N/C_subdom	Eukaryota
1	GRMZM2G409343			2.7244	4.2474	3.1949	2.5689	2.7854	1.3125	1.5949	2.7539	no	no	no	NA	NA	NA	IQ_motif_EF-hand-BS; Tropomyosin	Poaceae
1	GRMZM2G149073			0.8545	1.0443	1.3581	0.8466	0.4197	0.9809	0.4579	0.6013	no	no	no	hypothetical protein LOC100191829 (LOC100191829), mRNA	hypothetical protein LOC100191829	NA	NA	Magnoliophyta
1	GRMZM5G840582			2.1382	2.998	3.0683	2.0436	2.1843	2.4316	0.9843	1.6121	no	no	no	hypothetical protein LOC100279700 (LOC100279700), mRNA;hypothetical protein LOC100279700 (LOC100279700), mRNA	alanine aminotransferase 2	biosynthetic process;transferase activity, transferring nitrogenous groups;1-aminocyclopropane-1-carboxylate synthase activity;pyridoxal phosphate binding;biosynthetic process;transferase activity, transferring nitrogenous groups;1-aminocyclopropane-1-carboxylate synthase activity;pyridoxal phosphate binding;biosynthetic process;transferase activity, transferring nitrogenous groups;1-aminocyclopr…	Aminotransferase_I/II; PyrdxlP-dep_Trfase_major_dom; ACC_synthase	Eukaryota
1	GRMZM5G854334			28.4139	35.8974	37.0302	23.8098	29.8325	16.0758	13.7575	12.9899	no	no	no	NA	NA	NA	NA	Embryophyta
1	GRMZM2G362131			7.1355	6.8684	9.4119	4.1401	4.2602	1.5366	1.2294	1.4713	yes	no	no	NA	NA	NA	SprT	Eukaryota
1	GRMZM2G069672			7.9747	10.4195	7.2137	5.1451	6.8647	3.7484	2.3745	3.5298	no	no	no	NA	NA	NA	NA	NA
1	GRMZM2G041235			20.4258	36.6336	31.7948	22.2498	16.7345	13.2809	24.4106	31.1167	no	no	yes	LOC100216925 (pco066808), mRNA;hypothetical protein LOC100383985 (LOC100383985), mRNA	LOC100216925	NA	NA	Poaceae
1	GRMZM2G391627			0.3214	0.4588	0.8095	0.2232	0.2152	0.1727	0.1037	0.29	no	no	no	NA	NA	DNA binding;DNA topoisomerase (ATP-hydrolyzing) activity;ATP binding;chromosome;DNA topological change	Topo_IIA_B	Embryophyta
1	GRMZM2G169669			18.0628	18.3798	28.7033	13.0396	12.0967	13.856	10.245	8.2982	no	no	no	NA	NA	DNA binding;ligand-dependent nuclear receptor activity;structural molecule activity;structural constituent of cell wall;protein binding;nucleus;regulation of transcription, DNA-dependent;cell adhesion;actin cytoskeleton	Leu-rich_rpt; Leu-rich_rpt_typical-subtyp; Pistil_extensin; AT_hook-like; NOR1_rcpt; Vinculin	Embryophyta
1	GRMZM2G123308			45.3342	35.146	53.6958	32.1591	25.755	33.1934	28.6886	23.2252	no	no	no	KANADI-like transcription factor FEATHERED (LOC100281529), mRNA	KANADI-like transcription factor FEATHERED	NA	Myb_DNA-bd; Homeodomain-like; Myb-like+DNA-bd_dom_SHAQKYF	Embryophyta
1	GRMZM2G470862			12.1642	19.1943	18.0415	11.7679	13.4824	12.5385	9.6219	8.9052	no	no	yes	hypothetical protein LOC100192087 (LOC100192087), mRNA	hypothetical protein LOC100192087	nucleic acid binding	RRM_RNP1; RNA-recognition_dom1	Eukaryota
1	GRMZM2G056039			820.723	988.23	1030.46	895.183	823.896	851.017	610.956	1010.91	yes	yes	yes	NA	NA	ATP binding	Hsp_70; Heat_shock_70_CS; Hsp70	Viridiplantae
1	GRMZM2G158029			0.3325	0.5741	0.4799	0.4924	0.3748	0.2743	0.1331	0.2104	no	no	no	NA	NA	NA	Pentatricopeptide_repeat	Magnoliophyta
1	GRMZM2G081970			8.3019	7.7863	8.5487	6.4132	8.1963	3.9935	3.3934	6.3452	no	no	no	hypothetical protein LOC100276574 (LOC100276574), mRNA	hypothetical protein LOC100276574	hydrolase activity	Blactmase-like	Eukaryota
1	GRMZM2G067350			1.1967	1.6116	2.2391	1.0368	1.4257	1.1693	0.8077	1.0901	no	no	no	hypothetical protein LOC100191577 (LOC100191577), mRNA	hypothetical protein LOC100191577	NA	NA	Tracheophyta
1	GRMZM2G119916			30.2923	46.0196	35.9674	21.7105	19.5246	34.8447	26.0843	18.7333	no	no	no	NA	NA	NA	CHCH	Embryophyta
1	GRMZM2G143480			37.5468	51.5006	73.6642	35.9488	38.2063	34.1959	22.1748	27.448	no	no	no	6,7-dimethyl-8-ribityllumazine synthase (LOC100283301), mRNA	6,7-dimethyl-8-ribityllumazine synthase;6,7-dimethyl-8-ribityllumazine synthase	riboflavin biosynthetic process;riboflavin synthase complex;riboflavin biosynthetic process;riboflavin synthase complex;riboflavin biosynthetic process;riboflavin synthase complex;riboflavin biosynthetic process;riboflavin synthase complex	DMRL_synthase	Eukaryota
1	GRMZM2G368398			15.179	19.5409	22.5185	11.438	12.7284	11.3004	9.8879	15.7765	no	no	no	transposon protein (LOC100285924), mRNA	transposon protein	transmembrane transport	NA	Eukaryota
1	GRMZM2G178432			45.6719	66.1318	66.3935	33.5484	30.5524	50.3135	38.1606	41.3864	no	no	no	hypothetical protein LOC100277314 (LOC100277314), mRNA	hypothetical protein LOC100277314	NA	UPF0197	Eukaryota
1	GRMZM2G131024			48.8166	78.1593	81.1279	65.0513	60.5548	67.9917	52.8238	52.3887	no	no	no	LOC100284410 (pco153932), mRNA	LOC100284410;LOC100284410;LOC100284410	NA	DUF_KRTCAP2	Tracheophyta
1	GRMZM2G425863			212.491	185.717	237.682	204.231	165.832	139.12	256.266	121.244	yes	no	no	NA	NA	NA	Coiled-coil-dom_prot_109_C	Eukaryota
2	GRMZM2G030710			26.5892	31.6885	86.1401	66.6457	79.4814	24.6243	18.8845	40.6966	no	no	no	NA	NA	DNA binding;nucleus;regulation of transcription, DNA-dependent;response to hormone stimulus;regulation of transcription	TF_B3; Auxin_resp	Embryophyta
2	GRMZM2G075690			5.4978	4.3822	13.7611	10.8994	12.6693	2.6996	2.5159	3.8954	no	no	no	mov34/MPN/PAD-1 family protein (LOC100283490), mRNA	mov34/MPN/PAD-1 family protein	NA	NA	Eukaryota
2	GRMZM2G170420			14.0416	18.05	45.4195	37.4109	47.3552	10.9844	7.707	12.5022	no	no	no	NA	NA	NA	Ribosomal_S4e_central; KOW	Eukaryota
2	GRMZM2G070323			7.4673	9.1355	18.6107	20.0869	24.9748	6.6576	3.0794	8.0442	no	yes	no	NA	NA	phosphoprotein phosphatase activity;iron ion binding;protein binding;hydrolase activity;manganese ion binding	Ser/Thr_prot_Pase_BSU1; Kelch_2; Metallo-dependent_phosphatase; Gal_Oxase/kelch_b-propeller; Ser/Thr-sp_prot-phosphatase	Eukaryota
2	GRMZM2G102946			19.5928	30.554	45.1712	46.06	61.8054	21.0311	10.048	14.7778	yes	no	no	Rho-related protein from plants 5 (rop5), mRNA;rac-like GTP-binding protein 4 (LOC100381374), mRNA	rac-like GTP-binding protein 4;Rho-related protein from plants 5;rac-like GTP-binding protein 4;Rho-related protein from plants 5	GTPase activity;protein binding;GTP binding;intracellular;intracellular protein transport;nucleocytoplasmic transport;signal transduction;small GTPase mediated signal transduction;protein transport;GTPase activity;protein binding;GTP binding;intracellular;intracellular protein transport;nucleocytoplasmic transport;signal transduction;small GTPase mediated signal transduction;protein transport;GTP…	MIRO-like; Ras; GTPase_Ras; GTPase_Rab; GTPase_Rho; Ran_GTPase; Ras_GTPase; Small_GTP-bd	Eukaryota
2	GRMZM2G432083			1.5091	1.9815	7.0712	5.0085	7.8565	1.5969	0.7	1.3323	no	no	no	NA	NA	NA	NA	Eukaryota
2	GRMZM2G159935			0	0	0.1853	0.1153	0.4077	0.0901	0	0	no	no	no	NA	NA	NA	NA	Poaceae
2	GRMZM2G462417			1.2605	1.0946	1.7329	1.5444	1.8197	0.5405	0.3187	1.1777	no	no	no	NA	NA	NA	ZF_HD_homeobox_dimer_dom; Pentatricopeptide_repeat	Magnoliophyta
2	GRMZM2G077596			5.9379	6.0251	10.3633	12.6706	14.8241	3.15	1.734	4.0786	no	no	no	NA	NA	NA	NA	Embryophyta
2	GRMZM2G316967			3.2356	3.6827	11.5535	14.1352	15.7449	1.525	0.927	2.6413	no	no	no	NA	NA	NA	WD40_repeat_sg; WD40_repeat-like_dom; LisH_dimerisation; CTLH_C; WD40_repeat; WD40_repeat_CS; G-protein_beta_WD-40_rep_reg	Embryophyta
2	GRMZM2G175504			2.2029	2.6955	7.5723	9.8601	11.4314	1.0173	0.5448	1.6067	no	yes	no	NA	NA	protein kinase activity;protein serine/threonine kinase activity;ATP binding;protein amino acid phosphorylation	Se/Thr_prot_kinase-like_dom; Ser-Thr/Tyr-Pkinase; Kinase-like_dom; Tyr_Pkinase_cat_dom; Ser/Thr_prot_kinase_dom; Protein_kinase_ATP_BS	Eukaryota
2	GRMZM2G052339			3.425	1.8515	3.8485	3.9036	4.1069	1.4187	0.6747	2.3093	no	no	no	NA	NA	NA	Pentatricopeptide_repeat	Magnoliophyta
2	GRMZM2G375999			0.9301	0.6638	1.1452	0.9902	0.963	0.5724	0.2464	0.4982	no	no	no	NA	NA	nucleotide binding;RNA binding;RNA-directed DNA polymerase activity;RNA-dependent DNA replication;RNA splicing	RVT; Intron_maturse2; DNA-bd_dom_put	Embryophyta
2	GRMZM2G110406			18.267	20.7632	43.1255	36.824	50.0555	7.848	5.1985	9.8673	no	no	no	hypothetical protein LOC100273928 (LOC100273928), mRNA	hypothetical protein LOC100273928	guanyl-nucleotide exchange factor activity;GTP binding;GTPase binding	DOCK	Eukaryota
2	GRMZM2G122954			6.6638	12.9933	13.886	11.7956	16.7013	9.9261	5.929	5.6081	no	yes	no	hypothetical protein LOC100383322 (LOC100383322), mRNA	hypothetical protein LOC100383322	NA	NA	Embryophyta
2	GRMZM2G040079			10.773	15.24	29.2787	22.9783	24.4741	6.2258	3.4499	7.6384	no	no	no	bromodomain protein 103 (brd103), mRNA	bromodomain protein 103	nucleotide binding;ATP binding;ATPase activity;nucleoside-triphosphatase activity	ATPase_AAA_core; ATPase_AAA-5; Bromodomain; DEAD-like_N; ATPase_AAA+_core; Bromodomain_CS; ATPase_AAA_CS	Eukaryota
2	GRMZM2G083472			2.3251	3.7848	13.7167	10.6642	13.4233	3.6114	2.2769	6.1977	no	no	yes	NA	NA	NA	Myb_DNA-bd; Homeodomain-like; Myb-like+DNA-bd_dom_SHAQKYF	NA
2	GRMZM2G150098			12.9345	24.8016	44.6351	38.3903	42.1299	28.4701	22.063	29.0596	no	yes	yes	pyruvate kinase, cytosolic isozyme (LOC100283452), mRNA	pyruvate kinase, cytosolic isozyme	magnesium ion binding;catalytic activity;pyruvate kinase activity;glycolysis;potassium ion binding	Pyrv_Knase_brl; Pyrv_Knase_a/b; Pyrv/PenolPyrv_Kinase_cat; Pyrv_Knase_C-like; Pyrv_Knase_AS; Pyr_Knase	Eukaryota
2	GRMZM2G156069			3.0862	3.1518	6.4431	6.9446	8.6475	2.3344	1.4318	3.4137	no	no	no	NA	NA	nucleotide binding;metalloendopeptidase activity;ATP binding;proteolysis;zinc ion binding;membrane;integral to membrane;ATPase activity;nucleoside-triphosphatase activity;protein catabolic process	Pept_M41_FtsH_extracell; ATPase_AAA_core; ATPase_AAA-5; Peptidase_M41; ATPase_AAA+_core; ATPase_AAA_CS; Pept_M41_FtsH	Eukaryota
2	GRMZM2G406830			1.7799	2.3789	3.1853	3.9443	4.5596	1.1294	0.3788	1.4592	no	yes	no	NA	NA	catalytic activity;protein kinase activity;ATP binding;protein amino acid phosphorylation;electron carrier activity;oxidoreductase activity;metal ion binding;FAD binding;iron-sulfur cluster binding;oxidation reduction	2Fe-2S-bd; Mopterin_DH_FAD-bd; CO_DH_flav_C; Ald_Oxase/Xan_DH_a/b; AldOxase/xan_DH_Mopterin-bd; FAD-bd_2; Ferredoxin; Protein_kinase_ATP_BS	Eukaryota
2	GRMZM2G173700			8.939	10.0029	16.203	18.1472	19.5228	3.6758	3.0594	4.8422	no	no	no	NA	NA	microtubule motor activity;ATP binding;microtubule-based movement;microtubule motor activity;ATP binding;microtubule-based movement;microtubule motor activity;ATP binding;microtubule-based movement	Kinesin_motor_dom	Viridiplantae
2	GRMZM2G029194			10.2984	9.9855	18.854	18.0863	18.945	4.2101	2.6019	5.2992	no	no	no	NA	NA	NA	NA	Embryophyta
2	GRMZM2G102845			6.6781	9.7476	20.8288	30.0232	27.2344	4.5064	2.3722	6.2586	no	yes	no	NA	NA	DNA binding;nucleus;regulation of transcription, DNA-dependent;response to hormone stimulus;regulation of transcription	TF_B3; Auxin_resp; Peroxidases_heam-ligand_BS	Embryophyta
2	GRMZM2G045236			11.8298	13.4682	21.0581	18.743	18.3559	11.6113	6.7958	14.2241	no	no	no	DNA binding protein (LOC100281685), mRNA	DNA binding protein	DNA binding;transcription factor activity;nucleus;regulation of transcription, DNA-dependent;sequence-specific DNA binding;protein dimerization activity;DNA binding;transcription factor activity;nucleus;regulation of transcription, DNA-dependent;sequence-specific DNA binding;protein dimerization activity	bZIP_1; bZIP_2; TF_bZIP; Leuzip_CREB	Embryophyta
2	GRMZM2G086093			3.1307	3.7889	8.2104	9.913	12.1001	2.0269	1.7932	3.8443	no	no	no	NA	NA	binding;binding	HEAT; ARM-type_fold	Eukaryota
2	GRMZM2G051790			11.3377	7.71	15.5988	13.3411	14.63	3.9101	2.8589	4.5783	no	no	no	hypothetical protein LOC100273813 (LOC100273813), mRNA	hypothetical protein LOC100273813;hypothetical protein LOC100273813	catalytic activity	De-etiolated_protein_1_Det1; 6-hairpin_glycosidase-like	Eukaryota
2	GRMZM2G471039			0.0908	0.0462	0.0841	0.0486	0.1114	0.0502	0.024	0.0303	yes	yes	no	NA	NA	DNA binding	Myb_DNA-bd; Homeodomain-like; SANT_DNA-bd	Poaceae
2	GRMZM2G096470			10.1772	12.3695	17.5796	20.7927	20.2943	8.0533	5.5657	13.0066	no	no	no	NA	NA	Rab GTPase activator activity;intracellular;regulation of Rab GTPase activity;Rab GTPase activator activity;intracellular;regulation of Rab GTPase activity	NA	Eukaryota
2	GRMZM2G403562			4.1049	4.6123	9.813	7.9262	8.9669	2.2975	1.2811	2.748	no	no	no	NA	NA	protein binding;zinc ion binding;intracellular signaling pathway	DDT_dom; Znf_PHD-finger; Znf_FYVE_PHD; DDT_dom_subgr; Znf_PHD; Znf_RING; Prot_Kinase_C-like_PE/DAG-bd; Zinc_finger_PHD-type_CS	Embryophyta
2	GRMZM2G018223			8.397	9.0397	10.0369	11.2259	11.9004	4.0366	3.1121	3.8857	no	no	no	LOC100193043 (IDP267), mRNA	LOC100193043	hydrolase activity, hydrolyzing O-glycosyl compounds;carbohydrate metabolic process	IKI3; WD40_repeat-like_dom; Glyco_hydro_5_CS	Eukaryota
2	GRMZM2G099337			5.5229	4.0933	10.8935	12.6152	12.5	1.3072	0.815	2.1345	no	no	no	NA	NA	protein binding;zinc ion binding	Znf_FYVE_PHD; Znf_PHD	Embryophyta
2	GRMZM2G087806			3.6721	5.934	13.2749	12.0468	14.036	3.9141	2.5378	5.4812	no	yes	yes	NA	NA	zinc ion binding	Ankyrin_rpt; Znf_DHHC; Ankyrin_rpt-contain_dom	Eukaryota
2	GRMZM2G410644			0.7445	1.034	1.2633	1.662	1.5563	0.6279	0.3151	0.674	no	no	no	NA	NA	NA	NA	Eukaryota
2	GRMZM2G700655			2.0736	1.7853	2.9626	2.7357	3.3105	0.6797	0.423	0.6818	no	no	no	NA	NA	NA	NA	Poaceae
2	GRMZM2G151195			5.1552	7.0445	9.3982	9.9503	11.1009	2.8948	1.6104	3.2719	no	no	no	NA	NA	NA	NA	Viridiplantae
2	GRMZM2G024571			6.365	5.5201	15.5159	13.1389	14.9491	4.0798	1.6667	4.49	no	no	no	NA	NA	NA	NA	Poaceae
2	GRMZM2G438602			8.8695	12.0827	19.2929	19.1176	21.1536	5.3721	3.3296	6.6782	no	no	yes	NA	NA	nucleotide binding;aminoacyl-tRNA ligase activity;arginine-tRNA ligase activity;ATP binding;cytoplasm;translation;tRNA aminoacylation for protein translation;arginyl-tRNA aminoacylation	aa-tRNA-synth_I_CS; Arg-tRNA-synth_Ic_core	Eukaryota
2	GRMZM2G033785			7.2262	14.5269	23.1762	26.3053	27.0222	15.2473	12.2435	17.121	no	yes	yes	NA	NA	microtubule motor activity;ATP binding;microtubule-based movement	Kinesin_motor_dom; Kinesin_motor_CS	Eukaryota
2	GRMZM2G181158			2.3306	1.698	6.8542	6.0196	9.6966	1.4827	0.5989	1.2971	no	no	no	NA	NA	protein binding;zinc ion binding	Znf_PHD-finger; Znf_FYVE_PHD; Znf_PHD; Zinc_finger_PHD-type_CS	Tracheophyta
2	GRMZM2G104268			3.04	2.688	5.3718	6.3821	6.9286	1.1794	0.7565	1.5429	no	no	no	NA	NA	zinc ion binding;oxidoreductase activity;oxidation reduction;zinc ion binding;oxidoreductase activity;oxidation reduction	FAD-binding_1; OxRdtase_FAD/NAD-bd; TF_FAR1-related; MULE_transposase_cons-dom; Znf_SWIM; Riboflavin_synthase-like_b-brl; Znf_PMZ; Flavoprot_Pyr_Nucl_cyt_Rdtase	Magnoliophyta
2	GRMZM2G126957			4.4082	4.8922	6.9733	5.7337	7.2166	2.8636	1.725	3.6111	no	no	no	hypothetical protein LOC100383789 (LOC100383789), mRNA	hypothetical protein LOC100383789	nucleotide binding;DNA binding;transcription factor activity;cysteine-tRNA ligase activity;ATP binding;nucleus;cytoplasm;regulation of transcription, DNA-dependent;translation;cysteinyl-tRNA aminoacylation;CCAAT-binding factor complex;nucleotide binding;DNA binding;transcription factor activity;cysteine-tRNA ligase activity;ATP binding;nucleus;cytoplasm;regulation of transcription, DNA-dependent;…	Cys-tRNA-synt_Ia_N; TF_CBFB; CCAAT-binding_factor_CS	Eukaryota
2	GRMZM2G455115			3.5998	3.408	20.0326	15.7475	20.4549	2.9529	0.8422	3.8267	yes	yes	no	NA	NA	NA	NA	Eukaryota
2	GRMZM2G065692			3.3141	3.0959	6.3912	5.3075	5.3993	1.8532	1.1028	2.6193	no	no	no	hypothetical protein LOC100381536 (LOC100381536), mRNA	hypothetical protein LOC100381536	ATP binding;nucleus;regulation of transcription, DNA-dependent;apoptosis;defense response	NB-ARC; PAH; Disease_R	Poaceae
2	GRMZM2G092123			1.7213	2.036	3.7421	5.1731	5.277	1.6406	0.8615	1.8817	no	no	no	NA	NA	NA	Pentatricopeptide_repeat	Embryophyta
2	GRMZM2G049141			4.5306	4.4755	22.1647	30.0996	35.6611	3.3687	1.781	4.7405	yes	yes	yes	NA	NA	binding;intracellular;protein modification process;acid-amino acid ligase activity;binding;intracellular;protein modification process;acid-amino acid ligase activity	HEAT; HECT; ARM-type_fold; Armadillo	Eukaryota
2	GRMZM2G148098			1.5292	0.9958	2.759	2.3318	3.2472	0.6603	0.4898	1.1905	no	no	no	NA	NA	transcription factor activity;nucleus;regulation of transcription, DNA-dependent;transcription regulator activity;sequence-specific DNA binding	POX; Homeobox; Homeodomain-like; HTH_lambrepressr; Homeobox_CS	Eukaryota
2	GRMZM2G110306			2.1523	2.7017	5.3106	7.0313	6.5742	1.7632	0.8602	2.6119	no	no	no	NA	NA	NA	NA	Viridiplantae
2	GRMZM2G459715			0.4709	0.4636	0.8979	0.996	1.2632	0.3413	0.186	0.4435	no	no	no	NA	NA	NA	Pentatricopeptide_repeat	Viridiplantae
2	GRMZM2G084062			10.0831	13.7867	14.2846	14.2868	17.3988	4.4709	2.4053	4.1991	no	no	no	NA	NA	translation initiation factor activity;eukaryotic translation initiation factor 3 complex;translational initiation	eIF3c_N; PCI_dom	Eukaryota
2	GRMZM2G088793			0.8235	0.6784	1.6993	1.9132	1.8283	0.2985	0.3282	0.5527	no	no	no	hypothetical protein LOC100382001 (LOC100382001), mRNA	hypothetical protein LOC100382001	oxygen binding;heme binding	DUF630; DUF632; Leghaemoglobin_Fe_BS	Embryophyta
2	AC226230.2_FG001			3.5828	4.9521	14.3668	14.6411	17.6755	2.4758	1.2427	2.8142	yes	yes	yes	hypothetical protein LOC100384817 (LOC100384817), mRNA	hypothetical protein LOC100384817	NA	EST1	Eukaryota
2	GRMZM2G022726			3.7944	3.0153	9.0922	8.2688	9.6356	4.2922	2.888	5.9565	no	no	no	NA	NA	NA	NA	Embryophyta
2	GRMZM2G446050			8.7132	9.1187	18.7841	14.3658	18.483	7.1594	4.1539	8.4832	no	no	no	NA	NA	NA	NA	Viridiplantae
2	GRMZM2G059039			21.1672	25.3139	45.3283	43.7435	42.7188	17.526	11.4947	25.9563	no	no	no	hypothetical protein LOC100382203 (LOC100382203), mRNA	hypothetical protein LOC100382203	binding	NA	Eukaryota
2	GRMZM2G027723	cesa2	cellulose synthase2	6.0073	8.8258	15.3993	16.0329	21.1126	5.1424	3.6394	9.4364	no	yes	no	cellulose synthase-2 (CesA-2), mRNA	cellulose synthase-2	protein binding;zinc ion binding;membrane;cellulose synthase (UDP-forming) activity;cellulose biosynthetic process	Cellulose_synth; Znf_PHD; Znf_RING	Embryophyta
2	GRMZM2G096972			16.3687	23.4368	60.8256	55.8201	61.3423	15.3216	9.0372	19.079	no	no	no	hypothetical protein LOC100272422 (LOC100272422), mRNA	hypothetical protein LOC100272422	nucleic acid binding;nucleus	Cleavage/polyA-sp_fac_asu_C; WD40_repeat-like_dom; WD40_repeat; Ig/MHC_CS; Plasmid_virulence_protein	Eukaryota
2	GRMZM2G028700			6.9976	10.5782	14.8695	17.187	19.5147	5.602	3.4732	8.9201	no	yes	no	hypothetical protein LOC100192777 (LOC100192777), mRNA	hypothetical protein LOC100192777	phosphoprotein phosphatase activity;iron ion binding;protein binding;hydrolase activity;manganese ion binding;homoiothermy;ice binding;response to freezing	Ser/Thr_prot_Pase_BSU1; Kelch_2; Kelch_1; Metallo-dependent_phosphatase; Gal_Oxase/kelch_b-propeller; Ser/Thr-sp_prot-phosphatase; Antifreeze_1	Eukaryota
2	GRMZM5G819919			1.8126	2.6932	4.1778	3.383	5.1776	1.0037	0.5333	1.6022	no	no	no	NA	NA	nucleotide binding;ATP binding;apoptosis;defense response;nucleoside-triphosphatase activity	NB-ARC; ATPase_AAA+_core; Disease_R	Poaceae
2	GRMZM2G400005			0.8204	0.8409	0.9399	1.2399	1.1258	0.3378	0.1555	0.6065	no	no	no	NA	NA	NA	NA	Embryophyta
2	GRMZM2G413853			0.7822	0.3729	0.8508	1.058	1.2009	0.1101	0.0839	0.3661	no	no	no	NA	NA	nucleotide binding;nucleic acid binding;DNA binding;RNA binding;double-stranded RNA binding;helicase activity;ribonuclease III activity;ATP binding;intracellular;RNA processing;ATP-dependent helicase activity;hydrolase activity;nucleoside-triphosphatase activity;nucleotide binding;nucleic acid binding;DNA binding;RNA binding;double-stranded RNA binding;helicase activity;ribonuclease III activity;…	DNA/RNA_helicase_C; Dicer_dsRNA_binding_fold; PAZ; RNase_III; Ds-RNA-bd	Eukaryota
2	GRMZM2G104958			6.812	8.3921	22.1561	17.3392	20.1895	4.87	3.5062	7.3654	no	no	no	hypothetical protein LOC100383190 (LOC100383190), mRNA	hypothetical protein LOC100383190	NA	NA	Eukaryota
2	GRMZM2G048274			7.9702	8.7424	12.4854	14.4377	17.3478	6.3746	3.6113	7.3148	no	no	no	NA	NA	RNA binding	Agenet; DUF724; Tudor-like_plant	Tracheophyta
2	GRMZM2G085921			0.4365	1.1895	2.7783	2.4453	2.7099	0.6989	0.5524	0.7882	no	no	yes	hypothetical protein LOC100382289 (LOC100382289), mRNA	hypothetical protein LOC100382289	NA	NA	Zea mays
2	GRMZM2G126988			7.8296	9.2237	14.4994	15.7497	19.3221	3.6073	2.7259	6.1283	no	no	no	starch synthase IIc precursor (LOC100136828), mRNA	starch synthase IIc precursor	starch synthase activity;biosynthetic process;glucan biosynthetic process	Starch_synth_cat_dom; Glyco_trans_1; GlgA	Eukaryota
2	GRMZM2G073433			1.9999	1.7882	3.5218	4.1599	4.8808	1.0276	0.4151	1.3721	no	no	no	NA	NA	NA	Pentatricopeptide_repeat	Magnoliophyta
2	GRMZM2G454594			0.8749	1.0323	9.2154	9.2285	11.4558	1.0202	0.2603	1.3904	no	yes	no	NA	NA	nucleic acid binding;helicase activity;ATP binding;nucleic acid binding;helicase activity;ATP binding	DNA/RNA_helicase_C	Eukaryota
2	GRMZM2G052750			6.4567	4.0876	11.251	15.3359	14.0591	4.9618	3.7536	9.5467	no	no	no	NA	NA	NA	NA	Eukaryota
2	GRMZM2G446648			0.3131	0.3775	0.915	0.8135	0.8354	0.1439	0.1719	0.4413	no	no	no	NA	NA	DNA binding;transcription factor activity;nucleus;homoiothermy;regulation of transcription;ice binding;response to freezing	GCFC_dom; Antifreeze_1	Eukaryota
2	GRMZM2G146292			4.3595	3.5213	6.527	6.822	7.6213	2.5592	0.9791	2.8285	no	no	no	LOC100285025 (pco061809), mRNA	LOC100285025	NA	Tropomyosin	Eukaryota
2	GRMZM2G510522			2.4079	1.8517	3.172	1.8733	3.9394	1.5935	1.4571	0.7563	no	no	no	NA	NA	NA	NA	NA
2	GRMZM2G098677			0.8734	0.6385	3.0519	3.6626	4.898	0.3579	0.1007	0.6419	no	no	no	NA	NA	nucleotide binding;ATP binding;apoptosis;defense response;nucleoside-triphosphatase activity	NB-ARC; ATPase_AAA+_core; Disease_R	Poaceae
2	GRMZM2G099630			9.6886	10.013	15.3494	21.0741	20.7497	4.4176	3.3104	8.8053	no	no	no	hypothetical protein LOC100384297 (LOC100384297), mRNA	hypothetical protein LOC100384297;hypothetical protein LOC100384297;hypothetical protein LOC100384297	nucleic acid binding;exonuclease activity;5'-3' exoribonuclease activity;intracellular;nucleus;nucleobase, nucleoside, nucleotide and nucleic acid metabolic process;zinc ion binding;nucleic acid binding;exonuclease activity;5'-3' exoribonuclease activity;intracellular;nucleus;nucleobase, nucleoside, nucleotide and nucleic acid metabolic process;zinc ion binding;nucleic acid binding;exonuclease ac…	Put_53exo; Znf_CCHC	Eukaryota
2	GRMZM5G857351			6.6878	5.8982	38.7697	28.5165	39.4301	4.6945	2.7387	6.0282	no	no	no	NA	NA	NA	NA	NA
2	GRMZM2G057436			2.7858	2.7751	6.0186	6.8215	8.0249	1.7524	1.403	2.922	no	no	no	NA	NA	ubiquitin ligase complex;ubiquitin-protein ligase activity;binding;G-protein coupled receptor protein signaling pathway;integral to membrane;protein ubiquitination;ubiquitin ligase complex;ubiquitin-protein ligase activity;binding;G-protein coupled receptor protein signaling pathway;integral to membrane;protein ubiquitination;ubiquitin ligase complex;ubiquitin-protein ligase activity;binding;G-pr…	Ubox_domain; Armadillo; ARM-type_fold; 7TM_GPCR_Rhodpsn	Embryophyta
2	GRMZM2G451357			5.54	6.2694	10.6849	11.5103	14.5198	2.1239	2.163	3.1712	no	no	yes	NA	NA	ubiquitin thiolesterase activity;protein kinase activity;ATP binding;protein amino acid phosphorylation;ubiquitin-dependent protein catabolic process;ubiquitin thiolesterase activity;protein kinase activity;ATP binding;protein amino acid phosphorylation;ubiquitin-dependent protein catabolic process	Pept_C19_DUSP; Peptidase_C19; Protein_kinase_ATP_BS; Pept_C19ubi-hydrolase_C_CS	Eukaryota
2	GRMZM2G107987			2.9545	4.3671	15.9233	22.0581	18.1073	4.6619	3.1375	11.6612	no	yes	yes	NA	NA	nucleic acid binding;DNA binding;ATP-dependent DNA helicase activity;ATP binding;nucleobase, nucleoside, nucleotide and nucleic acid metabolic process;ATP-dependent helicase activity;hydrolase activity, acting on acid anhydrides, in phosphorus-containing anhydrides;nucleic acid binding;DNA binding;ATP-dependent DNA helicase activity;ATP binding;ATP-dependent helicase activity;hydrolase activity, …	Helicase_ATP-dep_c2	Eukaryota
2	GRMZM2G025592			54.9049	78.2344	121.291	154.575	165.677	50.5867	35.464	74.9363	no	yes	no	DNA cytosine methyltransferase MET2a (met2a), mRNA	DNA cytosine methyltransferase MET2a	chromatin;DNA binding;chromatin binding;nucleus;DNA methylation;chromatin assembly or disassembly	BAH_dom; C5_MeTfrase; Chromodomain; Chromo_dom_subgr; C5_DNA_meth_AS	Eukaryota
2	GRMZM2G333623			10.3643	11.2463	12.0589	12.5707	15.0792	3.9103	2.9471	5.4444	no	no	no	NA	NA	transcription factor TFIID complex;transcription initiation;transcription initiation factor activity	TAF4	Embryophyta
2	GRMZM2G401561			5.3257	6.6258	9.892	11.5446	11.8114	5.2041	3.0344	6.6685	no	yes	no	NA	NA	nuclear mRNA splicing, via spliceosome;intracellular;nucleus;RNA processing	PRP1_N; HAT; TPR_repeat; PLrV_ORF5	Eukaryota
2	AC218972.3_FG001			6.4973	9.6291	24.5069	18.5625	24.2741	3.8655	2.227	4.4829	no	yes	no	NA	NA	protein serine/threonine kinase activity;binding;ATP binding;protein amino acid phosphorylation	HEAT; ARM-type_fold; Kinase-like_dom; Ser/Thr_prot_kinase_dom	Eukaryota
2	GRMZM2G029506			0.8031	0.732	1.116	1.2526	1.4847	0.7797	0.3147	0.4575	no	no	no	NA	NA	nucleotide binding;ATP-dependent peptidase activity;serine-type endopeptidase activity;ATP binding;proteolysis;membrane;ATPase activity;nucleoside-triphosphatase activity;membrane	ABC_2_trans	Eukaryota
2	GRMZM5G889999			8.2296	9.7915	14.6588	14.2525	16.8291	8.4955	4.8802	13.6488	no	no	no	kinase interacting kinase1 (kik1), mRNA	kinase interacting kinase1	protein kinase activity;protein serine/threonine kinase activity;calcium ion binding;ATP binding;sugar binding;protein amino acid phosphorylation;recognition of pollen	B_lectin_man-bd; S_locus_glycoprot; PAN-2_domain; Se/Thr_prot_kinase-like_dom; Ser-Thr/Tyr-Pkinase; Kinase-like_dom; EGF_Ca-bd; Pan_app; Tyr_Pkinase_cat_dom; Ser/Thr_prot_kinase_dom; Ser/Thr_prot_kinase_AS	Magnoliophyta
2	AC218148.2_FG008			8.087	6.1968	10.4084	9.3339	11.6082	6.9119	3.0785	6.8659	yes	no	no	NA	LOC100279827	NA	Pentatricopeptide_repeat	Magnoliophyta
2	GRMZM2G030144			3.4865	5.1716	11.4277	9.5889	11.4103	2.9049	1.4998	3.7339	yes	no	no	hypothetical protein LOC100193027 (LOC100193027), mRNA;hypothetical protein LOC100193027 (LOC100193027), mRNA	hypothetical protein LOC100193027;hypothetical protein LOC100193027;hypothetical protein LOC100193027	binding;protein binding;Golgi apparatus;intracellular protein transport;protein transporter activity;protein transport;vesicle-mediated transport;membrane coat;clathrin adaptor complex;binding;protein binding;Golgi apparatus;intracellular protein transport;protein transporter activity;protein transport;vesicle-mediated transport;membrane coat;clathrin adaptor complex;binding;protein binding;intra…	Clathrin/coatomer_adapt-like_N; Clathrin_a/b/g-adaptin_app_Ig; ARM-type_fold; Clathrin/coatomer_app_Ig-like	Eukaryota
2	GRMZM2G017671			12.0778	6.0584	22.0934	19.726	20.0302	6.4786	4.0526	8.3352	no	no	no	LOC100279212 (pco101093a), mRNA	LOC100279212;LOC100279212	nucleotide binding;catalytic activity;aminoacyl-tRNA ligase activity;histidine-tRNA ligase activity;ATP binding;cytoplasm;translation;tRNA aminoacylation for protein translation;histidyl-tRNA aminoacylation;homoiothermy;ice binding;response to freezing;nucleotide binding;catalytic activity;aminoacyl-tRNA ligase activity;ATP binding;cytoplasm;translation;tRNA aminoacylation for protein translation…	aa-tRNA-synt_IIb_cons-dom; Anticodon-bd; His-tRNA-synth_IIa_sub	Eukaryota
2	GRMZM2G028307			4.6025	4.2623	12.6786	12.8376	17.0488	5.5582	4.3245	4.6282	no	no	no	hypothetical protein LOC100384721 (LOC100384721), mRNA	NA	hydrolase activity, hydrolyzing O-glycosyl compounds;carbohydrate metabolic process	Glyco_hydro_catalytic_core; Glyco_hydro_27	Eukaryota
2	GRMZM2G037469			0.8407	1.2907	1.2358	1.0787	1.5648	0.9683	0.3448	0.878	no	no	no	galactosylgalactosylxylosylprotein 3-beta-glucuronosyltransferase 1 (LOC100285106), mRNA	galactosylgalactosylxylosylprotein 3-beta-glucuronosyltransferase 1	galactosylgalactosylxylosylprotein 3-beta-glucuronosyltransferase activity;membrane	Glyco_trans_43	Embryophyta
2	GRMZM2G123499			2.7615	2.5417	7.4117	8.4827	9.1992	1.7702	1.1237	2.5123	no	no	no	NA	NA	NA	NA	Viridiplantae
2	GRMZM2G111113			0.9171	0.8563	3.2719	2.1821	2.988	0.9432	0.3711	0.7936	no	no	no	NA	NA	type I hypersensitivity	Pentatricopeptide_repeat; POA_allergen_C	Magnoliophyta
2	GRMZM2G065532			18.1046	17.592	23.4851	26.7742	28.9169	7.9588	5.644	10.4439	no	no	no	hypothetical protein LOC100216679 (LOC100216679), mRNA;hypothetical protein LOC100216679 (LOC100216679), mRNA	hypothetical protein LOC100216679;hypothetical protein LOC100216679	nucleic acid binding;intracellular;RNA processing;nucleic acid binding	RRM_RNP1	Eukaryota
2	GRMZM2G079904			4.0917	5.4137	7.5573	7.6045	9.6003	2.7552	2.7093	6.8046	no	no	no	NA	NA	NA	WD40_repeat_sg; WD40_repeat-like_dom; WD40_repeat; WD40_repeat_CS; G-protein_beta_WD-40_rep_reg	Eukaryota
2	GRMZM2G477879			2.6201	1.9336	17.2415	20.4947	26.1556	2.1654	0.567	2.3163	no	yes	no	NA	NA	binding	HEAT; ARM-type_fold	Eukaryota
2	GRMZM2G063737			4.896	9.9573	20.5529	18.4165	19.2644	5.7452	3.0327	6.9705	yes	yes	yes	hypothetical protein LOC100193595 (LOC100193595), mRNA	hypothetical protein LOC100193595	GTPase activity;GTP binding	Dynamin_GTPase; Dynamin	Eukaryota
2	GRMZM2G077054			2.0525	1.9606	5.7014	4.8341	4.8201	1.5868	0.5335	1.8134	no	no	no	NA	NA	flavin-containing monooxygenase activity;iron ion binding;glutamate biosynthetic process;nitrogen compound metabolic process;metabolic process;FMN binding;glutamate synthase activity;oxidoreductase activity;oxidoreductase activity, acting on the CH-NH2 group of donors, NAD or NADP as acceptor;glutamate synthase activity, NADH or NADPH as acceptor;FAD binding;NADP or NADPH binding;oxidation reduct…	GATase_2; Glu_synth_centr_N; Glu_synth_centr_C; Glu_synthase_C; FAD_pyr_nucl-diS_OxRdtase; GOGAT_euk; Pyridine_nuc-diS_OxRdtase_2; Flavin_mOase; Glut_synth_sub1	Eukaryota
2	GRMZM2G015126			12.0378	10.5318	19.5302	18.6997	19.4082	5.0688	3.637	6.7221	no	no	no	ankyrin like protein (LOC100285434), mRNA	ankyrin like protein	metabolic process;methyltransferase activity;metabolic process;methyltransferase activity	DUF248_MeTrfase; Methyltransf_11	Embryophyta
2	GRMZM2G431157			5.5396	5.9698	8.4265	7.971	8.5225	2.26	1.7499	3.1437	no	no	no	NA	NA	intracellular;zinc ion binding	TF_JmjC; Znf_C2H2; TF_JmjC_AAH; Znf_C2H2-like	Eukaryota
2	GRMZM2G062944			0.231	0.3753	0.4278	0.178	0.5938	0.104	0.0547	0.0506	no	no	no	NA	NA	NA	NA	NA
2	GRMZM5G844257			1.0479	0.6285	0.9987	0.6275	1.159	0.4643	0.4242	0.5639	no	no	no	LOC100274930 (cl15755_1), mRNA;hypothetical protein LOC100382632 (LOC100382632), mRNA	LOC100274930;hypothetical protein LOC100382632	NA	NA	Magnoliophyta
2	GRMZM2G035168			1.1249	1.2974	3.5161	4.6798	5.0291	1.6705	0.6528	1.2915	no	no	no	NA	NA	nucleotide binding;nucleic acid binding;DNA binding;ATP binding;ATP-dependent helicase activity;hydrolase activity;nucleoside-triphosphatase activity	Restrct_endonuc_I_R/III_Res; DNA/RNA_helicase_DEAD/DEAH_N; DEAD-like_N; ATPase_AAA+_core	Eukaryota
2	GRMZM2G059497			4.4089	6.337	10.5048	9.2624	11.1893	3.2651	2.5538	5.2054	no	yes	yes	hypothetical protein LOC100191464 (LOC100191464), mRNA	hypothetical protein LOC100191464	protein kinase activity;protein serine/threonine kinase activity;protein binding;ATP binding;protein amino acid phosphorylation	LRR-contain_N2; Leu-rich_rpt; Ser-Thr/Tyr-Pkinase; Kinase-like_dom; Ser/Thr_prot_kinase_dom; Tyr_Pkinase_cat_dom	Embryophyta
2	GRMZM2G001033			7.2297	9.4419	18.0935	15.9569	17.9033	7.5387	4.7996	11.1624	no	no	no	hypothetical protein LOC100191402 (LOC100191402), mRNA	NA	Golgi membrane;sugar:hydrogen symporter activity;carbohydrate transport;integral to membrane;Golgi membrane;sugar:hydrogen symporter activity;carbohydrate transport;integral to membrane;Golgi membrane;sugar:hydrogen symporter activity;carbohydrate transport;integral to membrane;Golgi membrane;sugar:hydrogen symporter activity;carbohydrate transport;integral to membrane	Nuc_sug_transpt	Eukaryota
2	GRMZM2G103266			8.8757	11.6748	26.8017	29.0903	31.4399	9.1893	7.5819	15.7888	no	yes	yes	protease 2 (LOC100281516), mRNA	protease 2	serine-type endopeptidase activity;proteolysis;serine-type peptidase activity;serine-type endopeptidase activity;proteolysis;serine-type peptidase activity;serine-type endopeptidase activity;proteolysis;serine-type peptidase activity;serine-type endopeptidase activity;proteolysis;serine-type peptidase activity;serine-type endopeptidase activity;proteolysis;serine-type peptidase activity;serine-ty…	Peptidase_S9A_N	Eukaryota
2	GRMZM2G070360			14.1446	28.3654	36.5124	31.2585	39.1242	22.7916	18.3549	18.1019	no	yes	yes	NA	NA	ATP synthesis coupled proton transport;proton-transporting two-sector ATPase complex, catalytic domain;proton-transporting ATPase activity, rotational mechanism	ATPase_V1/A1-cplx_esu	Eukaryota
2	GRMZM2G455587			0.7874	1.0126	2.3078	1.655	2.3979	0.5277	0.2909	0.9614	no	no	no	NA	NA	MAP kinase activity;ATP binding;protein amino acid phosphorylation	Pentatricopeptide_repeat; MAP_kinase_CS	Embryophyta
2	GRMZM2G372058			0.137	0.6282	1.3317	1.5121	1.7803	0.2931	0.1265	0.2963	no	no	yes	NA	NA	protein binding	LRR-contain_N2; Leu-rich_rpt; Leu-rich_rpt_typical-subtyp	Magnoliophyta
2	GRMZM2G103292			8.1862	11.9312	29.0015	22.0728	26.5716	9.3747	4.0939	9.3728	no	no	no	NA	NA	NA	NA	Andropogoneae
2	GRMZM2G368206			7.0977	7.0038	13.7428	17.9981	19.0022	6.0316	2.9835	7.4664	no	no	no	NA	NA	protein binding;zinc ion binding;intracellular signaling pathway;protein binding;zinc ion binding;intracellular signaling pathway;protein binding;zinc ion binding;intracellular signaling pathway	Znf_PHD-finger; Znf_FYVE_PHD; Prot_Kinase_C-like_PE/DAG-bd; Znf_PHD; Zinc_finger_PHD-type_CS	Eukaryota
2	GRMZM2G060800			2.0846	3.138	8.8582	8.4243	12.8632	2.2216	1.8095	3.7665	no	no	yes	aldehyde dehydrogenase, dimeric NADP-preferring (LOC100281700), mRNA	aldehyde dehydrogenase, dimeric NADP-preferring	aldehyde dehydrogenase [NAD(P)+] activity;cellular aldehyde metabolic process;metabolic process;oxidoreductase activity;oxidation reduction;aldehyde dehydrogenase [NAD(P)+] activity;cellular aldehyde metabolic process;metabolic process;oxidoreductase activity;oxidation reduction	Aldehyde_DH_dom; Ald_DH/histidinol_DH; Ald_DH_CS; Aldehyde_DH_NAD(P)	Eukaryota
2	GRMZM2G146313			1.0358	2.3773	3.6604	3.8308	3.6454	2.2188	1.3753	2.068	no	yes	yes	hypothetical protein LOC100382363 (LOC100382363), mRNA	hypothetical protein LOC100382363	NA	NA	Eukaryota
2	GRMZM2G173641			3.4213	4.2784	8.1134	7.5479	7.9788	2.1884	1.3595	3.1862	no	no	no	hypothetical protein LOC100384006 (LOC100384006), mRNA	hypothetical protein LOC100384006	catalytic activity;metabolic process	NA	Eukaryota
2	GRMZM2G099130			6.1804	8.5385	8.6911	10.286	12.6492	2.8737	2.4816	5.6933	no	no	no	NA	NA	NA	Chromatin_SPT2	Magnoliophyta
2	GRMZM2G377686			0.3872	0.4543	0.9968	0.9487	1.5018	0.3582	0.1077	0.2471	no	no	no	NA	NA	NA	NA	Embryophyta
2	GRMZM2G309624			1.3744	2.2451	3.806	4.0025	4.2126	0.6429	0.6387	1.0521	no	no	yes	NA	NA	protein binding;zinc ion binding	Znf_PHD-finger; Znf_FYVE_PHD; Homeodomain-like; Znf_PHD; Zinc_finger_PHD-type_CS	Magnoliophyta
2	GRMZM2G323470			3.7701	7.4758	16.6773	15.2713	22.2018	5.2973	3.517	5.8532	no	no	no	hypothetical protein LOC100273540 (LOC100273540), mRNA	hypothetical protein LOC100273540	NA	NA	Eukaryota
2	GRMZM2G426802			5.9284	7.6744	8.9164	8.9246	7.6023	4.0967	3.1944	6.7701	no	no	no	signal transducer (LOC100281552), mRNA	signal transducer	NA	WD40_repeat_sg; WD40_repeat-like_dom; WD40_repeat; G-protein_beta_WD-40_rep_reg	Eukaryota
2	GRMZM2G168913			39.0138	34.6863	45.7515	35.1508	46.4767	19.6655	13.4268	21.1397	no	no	no	NA	NA	NA	NA	Embryophyta
2	GRMZM2G162954			2.7177	5.5585	8.6486	8.3333	8.5796	4.6522	2.6835	4.1457	no	yes	yes	LOC100216861 (pco066270), mRNA	LOC100216861	nucleic acid binding	RRM_RNP1	Eukaryota
2	GRMZM2G438456			0.7159	1.6359	1.8939	1.6097	2.198	0.8314	0.3377	0.7591	no	no	no	NA	NA	NA	Pentatricopeptide_repeat	Tracheophyta
2	GRMZM2G145753			23.9901	36.4202	51.2938	49.8854	47.4938	23.8533	22.1861	51.8	no	no	no	hypothetical protein LOC100274594 (LOC100274594), mRNA	hypothetical protein LOC100274594	protein kinase activity;protein serine/threonine kinase activity;protein binding;ATP binding;protein amino acid phosphorylation	LRR-contain_N2; Leu-rich_rpt; Se/Thr_prot_kinase-like_dom; Ser-Thr/Tyr-Pkinase; Kinase-like_dom; Leu-rich_rpt_typical-subtyp; Tyr_Pkinase_cat_dom; Ser/Thr_prot_kinase_dom; Protein_kinase_ATP_BS	Embryophyta
2	GRMZM2G142740			3.0362	3.7012	6.3698	5.8185	6.0304	2.0223	0.9564	2.2354	no	no	no	NA	NA	RNA binding	RNA-binding_CRM	Embryophyta
2	GRMZM2G078468			3.2009	2.8783	7.0321	6.6556	6.5845	2.0422	1.2138	2.7573	no	no	no	NA	NA	ATP synthesis coupled proton transport;proton-transporting ATP synthase complex, catalytic core F(1);hydrogen ion transporting ATP synthase activity, rotational mechanism;proton-transporting ATPase activity, rotational mechanism;ATP synthesis coupled proton transport;proton-transporting ATP synthase complex, catalytic core F(1);hydrogen ion transporting ATP synthase activity, rotational mechanism…	ATPase_F1-cplx_gsu; WD40_repeat-like_dom; WD40_repeat; EGF-like_reg_CS	Eukaryota
2	GRMZM2G079417			1.8858	4.8635	4.5867	3.3622	4.9451	1.9551	2.2871	1.7651	no	yes	yes	NA	NA	NA	NA	NA
2	GRMZM2G437675			0.5278	2.0418	2.0436	1.8034	2.7609	0.6886	0.8362	0.9405	no	no	no	NA	NA	NA	NA	NA
2	AC198481.3_FG004			25.0267	29.2648	71.1394	61.2439	76.3362	11.4327	6.503	14.3593	no	no	no	NA	NA	phosphotransferase activity, alcohol group as acceptor	PI3/4_kinase_cat; Kinase-like_dom	Eukaryota
2	GRMZM2G164400			4.4801	7.2069	11.1228	10.9885	11.6773	10.378	7.317	8.9447	no	no	no	hypothetical protein LOC100276441 (LOC100276441), mRNA	hypothetical protein LOC100276441	NA	NA	Viridiplantae
2	GRMZM2G125656			1.0667	1.4179	2.1118	2.0152	2.2342	0.777	0.6726	1.427	no	no	no	NA	NA	protein phosphatase type 2A complex;signal transduction;protein phosphatase type 2A regulator activity	WD40_repeat_sg; WD40_repeat-like_dom; WD40_repeat; WD40_repeat_CS; G-protein_beta_WD-40_rep_reg	Eukaryota
2	GRMZM2G424582			4.6613	6.0926	13.955	14.1155	18.0173	2.6227	1.4906	4.3553	no	yes	no	NA	NA	protein kinase activity;protein serine/threonine kinase activity;protein binding;ATP binding;protein amino acid phosphorylation;zinc ion binding	Znf_C3HC4_RING-type; Se/Thr_prot_kinase-like_dom; Ser-Thr/Tyr-Pkinase; Ankyrin_rpt; Ankyrin_rpt-contain_dom; Kinase-like_dom; Znf_RING; Tyr_Pkinase_cat_dom; Ser/Thr_prot_kinase_dom; Znf_RING_CS	Embryophyta
2	GRMZM2G000177			4.766	4.2476	15.3453	15.5933	19.5067	2.9345	1.1696	3.5443	no	no	no	NA	NA	NA	WD40_repeat-like_dom; WD40_repeat; WD40_repeat_CS; G-protein_beta_WD-40_rep_reg	Viridiplantae
2	GRMZM2G009353			12.8334	14.1826	21.809	16.8881	21.7369	6.3242	4.7034	10.4599	no	no	no	NA	NA	potassium ion transport;potassium ion transmembrane transporter activity;membrane;potassium ion transport;potassium ion transmembrane transporter activity;membrane	K+_transporter; K+_uptake_protein_kup	Eukaryota
2	GRMZM2G448523			1.4352	1.8544	4.5942	4.4528	4.6876	1.172	0.5242	1.5763	no	no	no	NA	NA	nucleotide binding;motor activity;GTP binding;intracellular;flagellum assembly;bacterial-type flagellum hook;nucleoside-triphosphatase activity;nucleotide binding;motor activity;GTP binding;intracellular;flagellum assembly;bacterial-type flagellum hook;nucleoside-triphosphatase activity	AIG1; MMR_HSR1_GTP-bd; ATPase_AAA+_core; Flag_hook; Toc86_159	Eukaryota
2	GRMZM2G317835			2.1788	2.5267	6.6011	6.0887	7.1779	0.9969	0.6567	1.3104	no	no	no	NA	NA	NA	NA	Poaceae
2	GRMZM2G028353			4.8455	5.129	13.5797	10.7563	13.9803	3.4061	1.7864	4.7264	no	no	no	hypothetical protein LOC100280232 (LOC100280232), mRNA	hypothetical protein LOC100280232	protein binding;zinc ion binding;membrane;cellulose synthase (UDP-forming) activity;cellulose biosynthetic process;protein binding;zinc ion binding;membrane;cellulose synthase (UDP-forming) activity;cellulose biosynthetic process	Cellulose_synth; Znf_PHD; Znf_RING	Embryophyta
2	GRMZM2G319402			7.7811	8.4855	9.8055	10.7747	13.5687	3.8497	2.4886	5.288	no	no	no	NA	NA	catalytic activity;DNA repair;base-excision repair	HhH-GPD_domain; DNA_glycosylase	Eukaryota
2	GRMZM2G082191			3.3223	5.5294	11.3772	11.6524	13.246	1.707	1.7612	4.0847	no	yes	yes	NA	NA	catalytic activity;protein kinase activity;protein serine/threonine kinase activity;protein binding;ATP binding;protein amino acid phosphorylation;biosynthetic process;pyridoxal phosphate binding	LRR-contain_N2; Leu-rich_rpt; Se/Thr_prot_kinase-like_dom; Ser-Thr/Tyr-Pkinase; Kinase-like_dom; Leu-rich_rpt_typical-subtyp; Tyr_Pkinase_cat_dom; Ser/Thr_prot_kinase_dom; NHTrfase_class1_PyrdxlP-BS; Ser/Thr_prot_kinase_AS	Embryophyta
2	GRMZM5G827485			0.8959	1.0975	2.5254	2.544	2.8353	0.7434	0.3396	0.6566	no	no	no	hypothetical protein LOC100273844 (LOC100273844), mRNA	hypothetical protein LOC100273844	NA	Pentatricopeptide_repeat	Magnoliophyta
2	GRMZM2G030659			14.8921	13.8089	19.9495	20.0769	20.591	9.8662	5.2605	12.2139	no	no	no	hypothetical protein LOC100381523 (LOC100381523), mRNA	hypothetical protein LOC100381523	nucleic acid binding;helicase activity;ATP binding;ATP-dependent helicase activity	DNA/RNA_helicase_DEAD/DEAH_N; DNA/RNA_helicase_C; DEAD-like_N; RNA-helicase_DEAD-box_CS	Eukaryota
2	GRMZM2G044096			22.2343	35.1441	54.3172	55.6864	63.2797	18.5165	11.5348	25.3307	no	no	no	hypothetical protein LOC100382512 (LOC100382512), mRNA	hypothetical protein LOC100382512	hydrolase activity, hydrolyzing O-glycosyl compounds;oligosaccharyl transferase activity;carbohydrate metabolic process;protein amino acid glycosylation;membrane	Oligo_trans_STT3; Glyco_hydro_1_AS	Eukaryota
2	GRMZM2G701193			4.4424	5.64	7.1807	7.4389	9.0091	5.8517	2.066	5.7767	no	no	no	LOC100280495 (TIDP3536), mRNA	LOC100280495	nucleotide binding;aminoacyl-tRNA ligase activity;cysteine-tRNA ligase activity;ATP binding;cytoplasm;translation;tRNA aminoacylation for protein translation;cysteinyl-tRNA aminoacylation;nucleotide binding;aminoacyl-tRNA ligase activity;cysteine-tRNA ligase activity;ATP binding;cytoplasm;translation;tRNA aminoacylation for protein translation;cysteinyl-tRNA aminoacylation;nucleotide binding;cyst…	Cys-tRNA-synt_Ia_N	Eukaryota
2	GRMZM2G066876			1.7648	2.2688	4.902	6.8792	6.9922	1.6279	0.8221	1.766	no	yes	yes	NA	NA	protein binding;ATP binding;phosphatidylinositol phosphate kinase activity;cellular protein metabolic process;phosphatidylinositol metabolic process	Cpn60/TCP-1; PInositol-4-P-5-kinase_core; PInositol-4P-5-kinase_core_sub	Eukaryota
2	GRMZM2G044011			3.5763	7.1631	17.3334	13.9266	16.3361	7.6259	4.8925	7.1955	no	no	yes	NA	NA	translation	eRF1_2; eRF1_3	Eukaryota
2	GRMZM2G011998			4.0689	3.3873	11.2259	11.1256	12.9656	2.1197	1.2186	3.3834	no	no	no	NA	NA	NA	NA	Magnoliophyta
2	GRMZM2G037444			8.5971	9.6693	14.8054	15.0781	16.5885	6.3539	3.5963	8.2101	no	no	no	hypothetical protein LOC100383244 (LOC100383244), mRNA	hypothetical protein LOC100383244	DNA binding;RNA binding;DNA binding;RNA binding	BAH_dom; Agenet; Tudor-like_plant	Embryophyta
2	GRMZM2G042548			4.8169	7.1145	8.3627	8.9187	9.779	2.5601	1.4663	3.199	no	yes	no	LOC100285171 (IDP2368), mRNA	LOC100285171	NA	NA	Poaceae
2	GRMZM2G034362			8.3535	6.5902	12.9774	14.3838	15.5382	2.4722	2.4486	4.927	no	no	no	NA	NA	motor activity;ATP binding;myosin complex;motor activity;ATP binding;myosin complex	Myosin_head_motor_dom; IQ_motif_EF-hand-BS; Dil_domain; Prefoldin	Embryophyta
2	GRMZM2G046528			6.473	7.7228	17.2702	14.9747	21.8021	5.6474	2.3944	3.6481	no	no	no	hypothetical protein LOC100274021 (LOC100274021), mRNA	hypothetical protein LOC100274021	NA	NA	Zea mays
2	GRMZM2G317487			1.3531	2.8114	6.5249	5.2166	6.1648	1.6162	0.7702	2.3267	no	no	no	NA	NA	intracellular	BRCT	Tracheophyta
2	GRMZM2G040511			2.2049	1.7047	4.1472	4.677	5.0202	1.9428	1.3811	3.7219	no	no	no	LOC100281496 (pco091925), mRNA	LOC100281496	protein serine/threonine kinase activity;ATP binding;protein amino acid phosphorylation;protein serine/threonine kinase activity;ATP binding;protein amino acid phosphorylation	ABC_1; Kinase-like_dom; Ser/Thr_prot_kinase_dom	Eukaryota
2	GRMZM2G332562			4.9495	5.6611	13.8311	9.5379	13.3114	3.8996	2.2311	3.906	no	no	no	hypothetical protein LOC100193855 (LOC100193855), mRNA	hypothetical protein LOC100193855	dicarboxylic acid transport;amino acid transport;membrane;sodium:dicarboxylate symporter activity	AA_transpt_TM; Tryptophan/tyrosine_permease; ArAA_permease; Na-dicarboxylate_symporter	Eukaryota
2	GRMZM2G130905			8.9563	11.7688	19.3153	17.5527	21.5662	4.9627	3.3983	7.4507	no	yes	no	NA	NA	nucleic acid binding;zinc ion binding	OPR_PB1; Transposase_MuDR; MULE_transposase_cons-dom; Znf_SWIM; Znf_PMZ; Znf_CCHC	Magnoliophyta
2	GRMZM2G099160			4.1258	4.1653	10.9314	11.0731	12.9958	2.2983	2.0007	4.4528	no	no	no	NA	NA	dicarboxylic acid transport;membrane;sodium:dicarboxylate symporter activity;dicarboxylic acid transport;membrane;sodium:dicarboxylate symporter activity;dicarboxylic acid transport;membrane;sodium:dicarboxylate symporter activity;dicarboxylic acid transport;membrane;sodium:dicarboxylate symporter activity	Na-dicarboxylate_symporter	Embryophyta
2	GRMZM2G056988			7.4315	11.9041	12.5124	10.3219	19.6697	4.5085	4.3409	3.6299	no	no	no	hypothetical protein LOC100277951 (LOC100277951), mRNA;hypothetical protein LOC100277951 (LOC100277951), mRNA	hypothetical protein LOC100277951;hypothetical protein LOC100277951	protein folding;heat shock protein binding;unfolded protein binding;protein folding;unfolded protein binding	HSP40/DnaJ_pept-bd	Eukaryota
2	GRMZM2G041642			1.0792	2.8919	3.7968	3.3123	3.9459	1.5459	1.1696	1.1258	no	yes	yes	NA	NA	NA	WD40_repeat_sg; WD40_repeat-like_dom; WD40_repeat	Embryophyta
2	GRMZM5G848602			2.3733	3.6548	6.5545	6.64	6.5561	3.4676	1.3312	2.2619	no	yes	yes	NA	NA	nucleotide binding;GTPase activity;GTP binding;intracellular;defense response;small GTPase mediated signal transduction;nucleoside-triphosphatase activity	MMR_HSR1_GTP-bd; ATPase_AAA+_core; GTP1_OBG; Ras_GTPase; ProtSyn_GTP-bd; Disease_R; Small_GTP-bd	Eukaryota
2	GRMZM2G174087			0.7918	0.9162	5.181	3.9918	4.5193	1.796	1.8108	3.1143	no	no	no	NA	NA	NA	NA	NA
2	GRMZM2G015219			3.19	3.0585	15.4199	12.088	18.7206	2.9668	2.1046	5.6141	no	no	no	LOC100216592 (pco120195), mRNA;LOC100216592 (pco120195), mRNA	LOC100216592;LOC100216592	NA	TPR-1; TPR_repeat	Eukaryota
2	GRMZM2G477200			0.6869	0.8727	2.6694	3.2606	3.9994	0.783	0.3159	0.639	no	no	no	NA	NA	ATP-dependent peptidase activity;proteolysis	Pept_S16_N	Eukaryota
2	GRMZM2G009443	cip1	cytokinin inducible protease1	7.382	8.6241	11.3557	11.5749	13.2309	3.6631	2.537	5.642	no	no	no	hypothetical protein LOC100383416 (LOC100383416), mRNA	hypothetical protein LOC100383416	nucleotide binding;DNA binding;nuclease activity;protein binding;ATP binding;nucleotide-excision repair;ATPase activity;nucleoside-triphosphatase activity;protein metabolic process	Clp_N; ATPase_AAA_core; ATPase_AAA-5; UvrB/C; ATPase_AAA-2; Clp_ATPase_C; ATPase_AAA+_core; Chaprnin_clpA/B; Chaperonin_ClpA/B_CS	Eukaryota
2	GRMZM2G060824			9.0023	10.0992	23.3347	21.181	22.895	4.9235	3.2726	6.6268	yes	no	no	hypothetical protein LOC100384593 (LOC100384593), mRNA	NA	catalytic activity;ATP binding;ATP biosynthetic process;cation transport;metabolic process;ATPase activity, coupled to transmembrane movement of ions, phosphorylative mechanism;membrane;integral to membrane;hydrolase activity;hydrolase activity, acting on acid anhydrides, catalyzing transmembrane movement of substances;ATPase activity;ATP binding;ATP biosynthetic process;metabolic process;ATPase …	Hypothet_cof; ATPase_P-typ_ion-transptr; ATPase_P-typ_H-transp	Eukaryota
2	GRMZM2G065822			6.735	10.2437	14.4454	15.5229	17.6985	6.4506	3.1962	5.2365	no	yes	no	NA	NA	NA	WD40_repeat_sg; WD40_repeat-like_dom; Quino_amine_DH_bsu; WD40_repeat; G-protein_beta_WD-40_rep_reg	Eukaryota
2	GRMZM2G064005			6.6515	6.2394	10.8396	9.9042	11.4431	2.2441	2.2157	4.7753	no	yes	no	hypothetical protein LOC100384147 (LOC100384147), mRNA	hypothetical protein LOC100384147	NA	WD40_repeat_sg; WD40_repeat-like_dom; WD40_repeat; WD40_repeat_CS; G-protein_beta_WD-40_rep_reg; Gprotein_B	Eukaryota
2	GRMZM2G116831			1.7996	1.5676	3.5884	2.9679	3.2854	1.0932	0.7554	1.6886	no	no	no	NA	NA	cation transport;cation transmembrane transporter activity;membrane;transmembrane transport	Cation_efflux; Kininogen	Eukaryota
2	AC190628.4_FG007			6.0542	6.3154	9.6752	11.2716	14.8014	5.3978	1.8261	5.1752	no	no	no	NA	NA	NA	NA	Eukaryota
2	GRMZM2G107739			7.0395	7.7333	19.5084	22.9008	21.464	6.2318	6.0443	17.817	no	no	no	hypothetical protein LOC100384690 (LOC100384690), mRNA	hypothetical protein LOC100384690	transaminase activity;pyridoxal phosphate binding;transaminase activity;pyridoxal phosphate binding	NA	Eukaryota
2	GRMZM2G157727	phyA1	phytochromeA1	6.7749	10.9491	21.196	23.0643	32.1933	6.8535	7.0534	14.7484	no	no	no	hypothetical protein LOC100384268 (LOC100384268), mRNA	NA	two-component sensor activity;signal transducer activity;receptor activity;ATP binding;regulation of transcription, DNA-dependent;signal transduction;sensory perception;G-protein coupled photoreceptor activity;red, far-red light phototransduction;photoreceptor activity;membrane;phosphorylation;transferase activity, transferring phosphorus-containing groups;protein-tetrapyrrole linkage;protein-chr…	Phytochrome_A-E; PAS_2; GAF; Phytochrome_cen-reg; PAS_fold; PAS_4; Sig_transdc_His_kin_sub1_dim/P; ATPase-like_ATP-bd; PAS; Phyto_chromo_BS; Phytochrome; Sig_transdc_His_kin-like_C	Embryophyta
2	GRMZM2G067520			3.1882	5.1792	5.0536	3.8734	5.8505	3.4962	1.7179	2.8737	no	yes	no	hypothetical protein LOC100279203 (LOC100279203), mRNA	hypothetical protein LOC100279203	NA	ABC_1; Kinase-like_dom	Eukaryota
2	GRMZM2G551402			8.799	5.1203	27.3022	20.4578	26.3069	2.2014	1.2589	3.1386	no	no	no	NA	NA	ubiquitin thiolesterase activity;ubiquitin-dependent protein catabolic process	Peptidase_C19; Pept_C19ubi-hydrolase_C_CS	Eukaryota
2	GRMZM2G114572			1.4633	1.3771	1.8602	1.8444	2.4508	1.6288	0.7774	1.8338	no	no	no	NA	NA	NA	Pentatricopeptide_repeat; RNase_P_CS	Magnoliophyta
2	GRMZM2G179941			2.6307	4.2289	9.7189	12.9961	13.085	2.5042	0.8874	2.7601	no	yes	yes	NA	NA	catalytic activity;metalloendopeptidase activity;proteolysis;zinc ion binding;metal ion binding	Pept_M16_N; Peptidase_M16_C; Metalloenz_metal-bd	Viridiplantae
2	AC234185.1_FG004			18.183	24.1479	29.5315	29.6772	27.1819	14.8331	6.1194	11.3865	no	no	yes	NA	NA	catalytic activity;CTP synthase activity;pyrimidine nucleotide biosynthetic process	CTP_synthase_N; GATase_class1_C; CTP_synthase	Eukaryota
2	GRMZM2G131785			1.5902	3.8928	3.7157	3.5397	3.821	2.5951	1.7431	2.8452	no	no	yes	LOC100191337 (AY110217), mRNA	LOC100191337	nucleotide binding;ATP binding;ATPase activity;nucleoside-triphosphatase activity	ABC_transporter-like; ATPase_AAA+_core	Eukaryota
2	GRMZM2G031352			7.4737	9.0289	21.6826	18.7818	24.1829	7.9809	3.3043	7.3785	no	yes	yes	NA	NA	binding;binding	HEAT; ARM-type_fold	Eukaryota
2	GRMZM2G100419			11.7194	11.5979	24.8085	17.7873	21.8872	6.203	6.896	13.8141	no	no	no	hypothetical protein LOC100382518 (LOC100382518), mRNA	hypothetical protein LOC100382518	NA	NA	Eukaryota
2	GRMZM2G093119			10.9778	12.0345	26.6739	34.7216	38.4139	5.8828	5.0164	11.5538	no	no	no	hypothetical protein LOC100383357 (LOC100383357), mRNA	hypothetical protein LOC100383357;hypothetical protein LOC100383357	nuclear chromosome;nuclear chromosome	Rad21_Rec8_N	Eukaryota
2	GRMZM5G889321			4.5713	3.3543	5.2123	5.495	5.611	2.2556	2.0243	2.8117	yes	no	no	NA	NA	nucleotide binding;aminoacyl-tRNA ligase activity;ATP binding;cytoplasm;translation;tRNA aminoacylation for protein translation;transferase activity, transferring hexosyl groups;intrinsic to endoplasmic reticulum membrane	HexNAc_Trfase_a; aa-tRNA-synth_I_CS	Eukaryota
2	GRMZM2G446872			5.3138	6.1474	10.899	14.6295	17.2355	2.6547	1.5663	3.5688	no	yes	no	hypothetical protein LOC100279374 (LOC100279374), mRNA	hypothetical protein LOC100279374	regulation of transcription from RNA polymerase II promoter;RNA polymerase II transcription mediator activity;mediator complex	Mediator_Med14	Eukaryota
2	GRMZM2G055209			4.7566	5.882	16.4305	13.5014	18.0176	2.6136	1.5995	3.7202	no	no	no	NA	NA	magnesium ion binding;phospholipid-translocating ATPase activity;ATP binding;ATP biosynthetic process;ATPase activity, coupled to transmembrane movement of ions, phosphorylative mechanism;phospholipid transport;membrane;integral to membrane;hydrolase activity, acting on acid anhydrides, catalyzing transmembrane movement of substances;magnesium ion binding;phospholipid-translocating ATPase activit…	ATPase_P-typ_ATPase-assoc-dom; ATPase_P-typ_ion-transptr; ATPase_P-typ_P_site; ATPase_P-typ_Plipid-transl	Eukaryota
2	GRMZM2G044733			4.9042	6.0757	8.7724	8.6677	8.2205	4.8835	2.3429	4.2846	no	no	no	NA	NA	NA	Autophagy-rel_prot_13	Embryophyta
2	GRMZM2G046348			4.3871	9.2725	11.7824	14.8797	13.9951	9.7008	6.7762	6.5713	no	yes	yes	hypothetical protein LOC100192887 (LOC100192887), mRNA	hypothetical protein LOC100192887;hypothetical protein LOC100192887	NA	DUF788_TMEM208	Eukaryota
2	GRMZM2G022032			9.8137	14.0365	18.2028	17.0072	22.3536	5.7425	5.3154	11.0094	no	no	no	NA	NA	NA	Ankyrin_rpt; Ankyrin_rpt-contain_dom	Magnoliophyta
2	GRMZM2G013471			6.677	4.4215	8.2368	8.625	8.7551	3.6363	3.4865	7.0598	no	no	no	NA	NA	NA	NA	Viridiplantae
2	GRMZM5G872217			4.5976	4.9835	11.5074	11.306	14.6787	3.1959	1.4777	3.0631	no	yes	no	NA	NA	nucleic acid binding	RRM_RNP1; RNA-recognition_dom1	Eukaryota
2	GRMZM2G388915			2.0264	2.5341	4.0647	3.9522	4.8606	1.1915	0.5949	1.3136	no	no	no	NA	NA	DNA binding;single-stranded DNA binding;catalytic activity;nuclease activity;endonuclease activity;nucleus;DNA repair;nucleotide-excision repair	XPG_DNA_repair_N; XPG/RAD2_endonuclease; HhH2; XPGC_DNA_repair; XPGC_Rad_DNA_repair; XPG_CS	Eukaryota
2	GRMZM2G334142			1.5272	2.2016	11.8889	7.357	11.0288	1.479	0.4563	2.2067	no	yes	no	NA	NA	microtubule motor activity;ATP binding;microtubule-based movement	NA	Eukaryota
2	AC208110.2_FG006			24.402	25.3208	43.7071	42.7233	51.4908	20.0997	12.2927	30.8239	no	no	no	hypothetical protein LOC100384772 (LOC100384772), mRNA	NA	NA	NA	Magnoliophyta
2	GRMZM2G002559			31.7561	27.1092	35.2606	35.7183	46.9223	23.0813	17.1883	36.7454	yes	no	no	NA	NA	NA	NA	Embryophyta
2	GRMZM2G096070			12.6453	15.3026	20.302	21.7602	25.54	8.3831	4.4114	11.0914	no	no	no	NA	NA	NA	WD40_repeat_sg; WD40_repeat-like_dom; WD40_repeat	Eukaryota
2	GRMZM5G826666			15.408	16.8009	48.3478	45.2058	55.5728	11.2414	5.7241	18.3837	no	no	no	hypothetical protein LOC100383780 (LOC100383780), mRNA	NA	NA	NA	NA
2	GRMZM2G421495			1.1601	1.3236	2.736	2.1029	3.3692	0.7089	0.2787	0.5412	no	no	no	NA	NA	nucleotide binding;metallocarboxypeptidase activity;ATP binding;proteolysis;zinc ion binding;membrane;ATPase activity;nucleoside-triphosphatase activity	ABC_transporter-like; ABC_2_trans; PDR_assoc; ATPase_AAA+_core; Peptidase_M14; ABC_transporter_CS	Embryophyta
2	GRMZM5G884316			9.2597	5.5618	10.1237	8.0024	10.3993	3.1955	1.8967	4.3547	no	no	no	hypothetical protein LOC100383339 (LOC100383339), mRNA	NA	NA	NA	NA
2	GRMZM2G465999			0.1266	0.5541	0.8324	0.8962	1.4166	0.0636	0.0411	0.0518	no	no	no	NA	NA	protein kinase activity;protein serine/threonine kinase activity;ATP binding;sugar binding;protein amino acid phosphorylation;recognition of pollen;protein kinase activity;protein serine/threonine kinase activity;ATP binding;protein amino acid phosphorylation	Se/Thr_prot_kinase-like_dom; Ser-Thr/Tyr-Pkinase; Kinase-like_dom; Tyr_Pkinase_cat_dom; Ser/Thr_prot_kinase_dom; Protein_kinase_ATP_BS; Ser/Thr_prot_kinase_AS	Magnoliophyta
2	GRMZM2G015073			7.1874	10.1628	20.3184	23.5723	27.4428	5.9129	3.4545	7.9451	no	yes	yes	hypothetical protein LOC100381461 (LOC100381461), mRNA	NA	protein kinase activity;protein serine/threonine kinase activity;ATP binding;protein amino acid phosphorylation	Se/Thr_prot_kinase-like_dom; Ser-Thr/Tyr-Pkinase; Kinase-like_dom; Tyr_Pkinase_cat_dom; Ser/Thr_prot_kinase_dom; Ser/Thr_prot_kinase_AS	Eukaryota
2	GRMZM2G054040			2.259	2.7706	3.8075	4.027	4.0788	1.5446	0.8104	1.8922	no	no	no	NA	NA	RNA binding	RNA-binding_CRM	Embryophyta
2	AC206764.4_FG001			1.1701	1.2332	2.1114	1.9125	2.4048	0.7734	0.4124	1.0022	no	no	no	NA	NA	NA	Pentatricopeptide_repeat	Embryophyta
2	GRMZM2G472376			5.6633	7.4128	21.1987	25.6637	26.8693	5.3402	4.7222	10.642	no	yes	no	catalytic/ ligase (LOC100285971), mRNA	catalytic/ ligase	catalytic activity;metabolic process	AMP-dep_Synth/Lig; AMP-binding_CS	Eukaryota
2	GRMZM2G318849			23.471	23.4676	56.1864	49.8834	49.564	12.752	6.4974	15.9546	no	yes	no	hypothetical protein LOC100278719 (LOC100278719), mRNA	hypothetical protein LOC100278719;hypothetical protein LOC100278719;hypothetical protein LOC100278719;hypothetical protein LOC100278719;hypothetical protein LOC100278719	binding;serine-type peptidase activity;integral to membrane;binding;serine-type peptidase activity;integral to membrane;binding;serine-type peptidase activity;integral to membrane;binding;serine-type peptidase activity;integral to membrane;binding;serine-type peptidase activity;integral to membrane	HEAT; ARM-type_fold; Pept_S26A_signal_pept_1_Ser-AS	Embryophyta
2	GRMZM2G149681			1.6799	1.3643	1.7809	2.2933	2.4197	1.0704	0.5282	1.4089	no	no	no	methyltransferase small domain (LOC100281044), mRNA	methyltransferase small domain	NA	Pentatricopeptide_repeat	Magnoliophyta
2	AC191283.3_FG004			0.219	0.3858	1.4711	1.7488	1.7512	0.4122	0.1569	0.265	no	no	no	NA	NA	protein binding	LRR-contain_N2; Leu-rich_rpt; Leu-rich_rpt_typical-subtyp	Embryophyta
2	GRMZM2G458650			1.1655	1.166	3.3465	2.6954	2.7747	0.8449	0.3401	0.5929	no	no	no	NA	NA	NA	NA	Magnoliophyta
2	GRMZM2G050984			3.8368	3.4825	4.6792	4.972	5.9719	1.534	1.1862	1.6424	no	no	no	NA	NA	oxidoreductase activity;oxidation reduction	AldOxase/xan_DH_Mopterin-bd	Eukaryota
2	GRMZM2G010306			7.0859	12.2086	24.5159	25.9368	27.2368	8.6388	4.1104	8.527	no	yes	no	hypothetical protein LOC100191459 (LOC100191459), mRNA	hypothetical protein LOC100191459	GTPase activity;GTP binding	Dynamin_GTPase; Dynamin	Eukaryota
2	GRMZM2G154059			2.1494	1.1129	3.2759	3.8698	4.3658	1.0601	0.601	1.2361	no	no	no	NA	NA	NA	Pentatricopeptide_repeat	Viridiplantae
2	GRMZM2G019681			0.5971	1.3741	3.6104	3.7872	4.8561	1.6652	1.5445	1.0997	no	no	yes	NA	NA	NA	NA	Embryophyta
2	GRMZM2G002646			2.3293	4.9344	9.4665	8.6069	8.9863	3.4054	1.004	3.0791	no	no	no	NA	NA	NA	NA	Viridiplantae
2	GRMZM2G011101			11.4771	20.9195	48.0557	43.2163	49.1175	14.2013	6.4786	16.3393	no	yes	no	hypothetical protein LOC100384840 (LOC100384840), mRNA	hypothetical protein LOC100383446;hypothetical protein LOC100384840	structural molecule activity;binding;protein binding;intracellular protein transport;vesicle-mediated transport;membrane coat;COPI vesicle coat	Clathrin/coatomer_adapt-like_N; Coatomer_bsu_C; ARM-type_fold; Coatomer_beta_subunit	Eukaryota
2	GRMZM5G812738			5.1663	4.5721	13.8546	13.1551	17.103	2.8062	1.3337	2.5043	no	yes	no	NA	NA	NA	NA	Magnoliophyta
2	GRMZM2G116557			87.0651	107.218	173.214	208.786	261.935	85.7348	45.6288	127.072	no	no	no	NA	NA	DNA binding;nucleus;regulation of transcription, DNA-dependent;response to hormone stimulus;regulation of transcription;DNA binding;nucleus;regulation of transcription, DNA-dependent;response to hormone stimulus;regulation of transcription;DNA binding;nucleus;regulation of transcription, DNA-dependent;response to hormone stimulus;regulation of transcription;DNA binding;nucleus;regulation of trans…	TF_B3; Auxin_resp	Embryophyta
2	GRMZM2G356839			6.8879	7.7357	32.1334	16.2841	33.321	7.0698	6.8876	13.8669	no	no	no	NA	NA	NA	NA	NA
2	GRMZM2G120574			5.7252	4.5458	8.0139	6.5833	7.6057	3.8905	2.3068	6.415	no	no	no	NA	NA	protein kinase activity;protein serine/threonine kinase activity;protein binding;ATP binding;protein amino acid phosphorylation	LRR-contain_N2; Leu-rich_rpt; Se/Thr_prot_kinase-like_dom; Ser-Thr/Tyr-Pkinase; Kinase-like_dom; Leu-rich_rpt_typical-subtyp; Tyr_Pkinase_cat_dom; Ser/Thr_prot_kinase_dom; Protein_kinase_ATP_BS; Ser/Thr_prot_kinase_AS	Tracheophyta
2	GRMZM2G062357			2.3973	1.8579	5.4256	6.9715	8.3036	1.5767	1.0167	2.754	no	no	no	hypothetical protein LOC100194266 (LOC100194266), mRNA	hypothetical protein LOC100194266	catalytic activity;metabolic process;homoiothermy;ice binding;response to freezing	NA	Eukaryota
2	GRMZM2G701730			0.3082	0.3629	0.3978	0.5013	0.3014	0.3108	0.122	0.1956	no	no	no	NA	NA	nucleic acid binding;ATP binding;ATP-dependent helicase activity	NA	Zea mays
2	GRMZM2G065423			11.3653	17.7492	22.9504	21.9343	27.6475	12.7225	9.5455	22.3972	no	no	no	LOC100279236 (si606015d04), mRNA	LOC100279236	Rho guanyl-nucleotide exchange factor activity;Rho guanyl-nucleotide exchange factor activity	Rop_nucl_exchang_PRONE	Eukaryota
2	AC234180.1_FG002			0.7521	1.8911	2.7528	2.6331	2.5757	0.8739	1.013	0.8569	no	yes	no	zinc ion binding protein (LOC100280689), mRNA	zinc ion binding protein	zinc ion binding	Znf_FYVE; Ysc84_actin-binding; Znf_FYVE_PHD	Eukaryota
2	AC233953.1_FG005			13.2134	15.6767	26.015	21.3862	29.6092	5.8249	4.7193	9.011	no	yes	no	NA	NA	potassium ion transport;potassium ion transmembrane transporter activity;membrane	K+_transporter; K+_uptake_protein_kup	Embryophyta
2	GRMZM2G077420			2.6721	3.7803	5.0476	4.9053	4.9832	1.829	1.1297	2.4276	no	no	no	NA	NA	NA	Pentatricopeptide_repeat	Embryophyta
2	GRMZM2G006325			0.7108	1.5969	4.3174	3.4536	4.9335	0.8241	0.2973	1.2495	no	no	no	NA	NA	NA	NA	NA
2	GRMZM2G318527			6.6261	6.6941	10.8081	8.3448	10.1569	2.7433	1.4366	2.6127	no	no	no	NA	NA	zinc ion binding	Reg_chr_condens; Znf_FYVE; DiseaseR/Znf/csome_condsation; Reg_csome_cond/b-lactamase_inh; Znf_FYVE_PHD	Eukaryota
2	GRMZM2G031584			2.2218	3.3081	5.759	4.5986	5.2415	2.5913	1.255	2.228	no	no	no	NA	NA	heat shock protein binding	DnaJ_N	Embryophyta
2	GRMZM2G012923			4.4953	4.272	11.5862	10.5111	11.9094	2.1135	1.4697	4.2962	no	no	no	NA	NA	transporter activity;transport;membrane;integral to membrane;substrate-specific transmembrane transporter activity;transmembrane transport	Sub_transporter; MFS_1; MFS_general_subst_transpt; Sugar_transporter_CS; Sugar/inositol_transpt	Viridiplantae
2	GRMZM2G056120			21.4878	22.6819	42.645	47.4363	56.8671	11.856	11.8356	26.5827	no	no	no	hypothetical protein LOC100383168 (LOC100383168), mRNA	hypothetical protein LOC100383168	DNA binding;nucleus;regulation of transcription, DNA-dependent;response to hormone stimulus;regulation of transcription	TF_B3; Auxin_resp; Restrct_endonuc_II_EcoRII_N	Embryophyta
2	AC206840.3_FG002			3.4034	7.726	15.0319	9.932	15.4891	5.0462	4.1741	2.8727	no	no	yes	hypothetical protein LOC100278758 (LOC100278758), mRNA;hypothetical protein LOC100278916 (LOC100278916), mRNA	hypothetical protein LOC100278758;hypothetical protein LOC100278916	NA	NA	Embryophyta
2	GRMZM2G378580			95.8703	143.886	253.068	196.098	253.294	134.724	77.0466	126.792	no	no	no	hypothetical protein LOC100274564 (LOC100274564), mRNA	hypothetical protein LOC100274564	DNA binding;nucleus;regulation of transcription, DNA-dependent;response to hormone stimulus;regulation of transcription;DNA binding;nucleus;regulation of transcription, DNA-dependent;response to hormone stimulus;regulation of transcription;nucleus;regulation of transcription;DNA binding;nucleus;regulation of transcription, DNA-dependent;response to hormone stimulus;regulation of transcription;DNA…	K_chnl_volt-dep_Kv1.4; Antifreeze_1	Embryophyta
2	GRMZM2G423456			6.9871	7.1794	17.8953	20.0929	23.0196	3.3378	2.5825	8.4044	no	no	no	hypothetical protein LOC100274238 (LOC100274238), mRNA;hypothetical protein LOC100280357 (LOC100280357), mRNA;histidine kinase 2 (HK2), mRNA;hypothetical protein LOC100274238 (LOC100274238), mRNA	hypothetical protein LOC100274238;hypothetical protein LOC100274238	two-component sensor activity;two-component response regulator activity;two-component signal transduction system (phosphorelay);ATP binding;regulation of transcription, DNA-dependent;signal transduction;membrane;phosphorylation;transferase activity, transferring phosphorus-containing groups;two-component sensor activity;two-component response regulator activity;two-component signal transduction s…	CHASE; Sig_transdc_His_kin_sub1_dim/P; ATPase-like_ATP-bd; Sig_transdc_resp-reg_receiver; CheY-like; Sig_transdc_His_kin-like_C; Cl-channel_volt-gated	Eukaryota
2	GRMZM2G079428			3.0358	2.9389	5.2112	6.0843	5.8941	2.1914	1.4578	3.9292	no	no	no	NA	NA	NA	NA	Viridiplantae
2	GRMZM2G143139			0.62	0.5654	1.499	1.4933	1.3104	0.2973	0.1969	0.5006	no	no	no	NA	NA	nucleotide binding;ATP-dependent peptidase activity;serine-type endopeptidase activity;ATP binding;proteolysis;membrane;ATPase activity;nucleoside-triphosphatase activity	ABC_transporter-like; ABC_2_trans; PDR_assoc; ATPase_AAA+_core; Peptidase_S16_C	Embryophyta
2	GRMZM2G021517			2.9705	3.5169	8.5841	8.5057	7.8571	6.0058	3.9357	6.1361	no	yes	yes	hypothetical protein LOC100382276 (LOC100382276), mRNA	hypothetical protein LOC100382276	protein kinase activity;protein serine/threonine kinase activity;ATP binding;protein amino acid phosphorylation;signal transduction;protein kinase activity;protein serine/threonine kinase activity;ATP binding;protein amino acid phosphorylation;signal transduction	Se/Thr_prot_kinase-like_dom; Ser-Thr/Tyr-Pkinase; NAF_dom; Kinase-like_dom; Tyr_Pkinase_cat_dom; Ser/Thr_prot_kinase_dom; Ser/Thr_prot_kinase_AS	Embryophyta
2	GRMZM2G377539			18.5537	18.1971	45.4126	46.3608	57.7621	19.9447	11.7636	22.2888	no	no	no	NA	NA	ATP binding;structural constituent of cell wall;peptidoglycan-based cell wall;S-layer	NA	Poaceae
2	GRMZM5G881464			16.1192	17.8388	23.0653	29.8619	32.1806	6.9807	6.0658	11.7824	no	no	no	ATP binding protein (LOC100302578), mRNA	ATP binding protein	microtubule motor activity;ATP binding;microtubule-based movement;microtubule motor activity;ATP binding;microtubule-based movement	Kinesin_motor_dom; Kinesin_motor_CS	Eukaryota
2	GRMZM2G443447			1.2877	0.8124	7.1071	9.9423	12.8758	0.642	0.0777	0.8387	yes	yes	no	NA	NA	NA	NA	Eukaryota
2	GRMZM2G462062			2.9518	2.6903	7.0195	8.9253	9.3832	1.8892	1.2894	2.8005	no	yes	yes	LOC100276564 (si605085g01), mRNA	LOC100276564;LOC100276564;LOC100276564	NA	NA	Tracheophyta
2	GRMZM2G068212			4.5997	6.8632	14.7393	9.8253	13.7525	2.4927	2.6486	3.9633	no	yes	no	NA	NA	transporter activity;transport;secondary active sulfate transmembrane transporter activity;sulfate transport;membrane;integral to membrane;transmembrane transport	Xant/urac/vitC; Sulph_transpt; SO4_transptr/STAS; S04_transporter_CS; SulP_transpt	Eukaryota
2	GRMZM2G006765			7.9936	19.1714	32.7047	36.4124	44.948	16.0179	13.1277	19.9256	no	yes	no	hypothetical protein LOC100304239 (LOC100304239), mRNA	hypothetical protein LOC100304239	protein binding;ATP binding	Actin-like; Actin_CS; Actin/actin-like_CS	Eukaryota
2	GRMZM5G892080			3.1129	3.7971	3.8067	3.7455	4.095	2.0496	1.8796	3.8285	no	no	no	NA	NA	NA	NA	NA
2	GRMZM2G115280			1.3956	2.1046	3.5915	3.0612	4.5685	1.5179	0.5397	1.7276	no	yes	no	NA	NA	NA	NA	Poaceae
2	GRMZM2G359786			1.7758	3.6023	4.1432	4.6662	5.1855	3.2044	1.9466	3.25	no	no	no	NA	NA	NA	NA	Viridiplantae
2	GRMZM5G887631			10.9193	13.7402	26.8899	29.721	34.8532	4.0305	4.1055	6.394	no	yes	yes	NA	NA	binding	HEAT; ARM-type_fold	Eukaryota
2	GRMZM2G077914			1.9179	1.4528	3.4482	2.8658	3.8494	1.3099	1.1097	2.2769	no	no	no	hypothetical protein LOC100193171 (LOC100193171), mRNA	hypothetical protein LOC100193171	protein kinase activity;protein serine/threonine kinase activity;ATP binding;protein amino acid phosphorylation;protein kinase activity;protein serine/threonine kinase activity;ATP binding;protein amino acid phosphorylation	NA	Magnoliophyta
2	GRMZM2G053980			2.1306	1.6303	12.2522	13.2582	13.6294	3.3566	1.0965	2.0859	no	no	no	NA	NA	NA	NA	Eukaryota
2	GRMZM2G143238			6.0858	6.451	7.3422	7.4693	8.1687	3.5349	2.4527	5.8097	no	no	no	NA	NA	protein kinase activity;protein serine/threonine kinase activity;ATP binding;protein amino acid phosphorylation;protein kinase activity;protein serine/threonine kinase activity;protein binding;ATP binding;protein amino acid phosphorylation	Leu-rich_rpt; Ser-Thr/Tyr-Pkinase; Kinase-like_dom; Leu-rich_rpt_typical-subtyp; Tyr_Pkinase_cat_dom; Ser/Thr_prot_kinase_dom	Embryophyta
2	GRMZM2G049322			3.9642	4.6254	9.7869	8.5727	11.3088	2.4865	1.8621	3.3691	no	no	no	hypothetical protein LOC100274687 (LOC100274687), mRNA	hypothetical protein LOC100274687	NA	NA	Magnoliophyta
2	GRMZM2G069865			9.2303	10.2377	18.2149	16.2949	18.8987	7.2789	4.072	9.12	no	no	no	hypothetical protein LOC100192885 (LOC100192885), mRNA	hypothetical protein LOC100192885	iron ion binding;FMN binding;oxidoreductase activity;oxidation reduction	Flavodoxin/NO_synth; FAD-binding_1; OxRdtase_FAD/NAD-bd; Riboflavin_synthase-like_b-brl; Flavoprot_Pyr_Nucl_cyt_Rdtase; Flavdoxin	Eukaryota
2	GRMZM2G470292			9.4925	10.1628	31.6568	32.2896	36.5318	5.1007	3.4254	9.1617	no	yes	no	NA	NA	binding	NA	Eukaryota
2	GRMZM2G154549			0.0607	0.397	0.8467	0.2174	1.1965	0.0821	0.6103	0.1924	no	no	no	hypothetical protein LOC100278262 (LOC100278262), mRNA	hypothetical protein LOC100278262	NA	NA	Viridiplantae
2	GRMZM2G174803			4.6315	4.9758	12.9122	12.1965	14.5416	3.7629	1.8018	3.1478	no	yes	no	NA	NA	binding	ARM-type_fold	Eukaryota
2	GRMZM2G059010			5.8016	7.5791	15.2562	21.5102	19.465	5.7275	5.53	5.0714	no	yes	yes	LOC100191506 (cl3646_1), mRNA	LOC100191506	DNA binding;DNA-directed DNA polymerase activity;DNA replication;DNA binding;DNA-directed DNA polymerase activity;DNA replication	DNA_pol_alpha/epsilon_bsu; DNA_pol_alpha_bsu	Eukaryota
2	GRMZM2G093098			1.0557	2.1446	2.5665	3.2983	3.4637	0.9823	0.8627	1.1892	no	yes	no	NA	NA	NA	Pentatricopeptide_repeat	Embryophyta
2	GRMZM2G153797			10.2842	4.8112	36.659	30.6153	36.7334	2.7644	0.732	3.6633	no	no	no	NA	NA	DNA binding;DNA-directed RNA polymerase activity;transcription	RNA_pol_asu; RNA_pol_Rpb1_3; RNA_pol_N	Eukaryota
2	GRMZM2G013971			4.9677	5.3316	6.2124	5.4755	5.9328	3.3223	1.9724	3.9963	no	no	no	hypothetical protein LOC100274494 (LOC100274494), mRNA	hypothetical protein LOC100274494;hypothetical protein LOC100274494	ubiquitin ligase complex;ubiquitin-protein ligase activity;protein binding;zinc ion binding;protein ubiquitination;ubiquitin ligase complex;ubiquitin-protein ligase activity;protein binding;zinc ion binding;protein ubiquitination	Znf_C3HC4_RING-type; Ubox_domain; Znf_RING-CH; Znf_RING; Znf_RING_CS	Eukaryota
2	GRMZM2G055992			2.0725	2.9452	5.2306	6.233	7.7647	2.1215	1.4486	4.3155	no	no	no	hypothetical protein LOC100274964 (LOC100274964), mRNA	hypothetical protein LOC100274964	protein binding;homoiothermy;ice binding;response to freezing	Leu-rich_rpt; Leu-rich_rpt_typical-subtyp; Antifreeze_1	Eukaryota
2	GRMZM2G168849			2.3805	2.2615	3.5309	2.8341	3.7128	1.6214	0.8588	1.9742	no	no	no	NA	hypothetical protein LOC100383206	DNA binding;nuclease activity;nucleotide-excision repair	UvrB/C; UvrB_UvrC-bd_C; Prefoldin; Tropomyosin	Tracheophyta
2	GRMZM2G156910			1.8817	2.1853	5.6626	7.4584	8.1379	1.1947	0.7653	1.9462	no	yes	no	hypothetical protein LOC100383891 (LOC100383891), mRNA	hypothetical protein LOC100383891;hypothetical protein LOC100383891;hypothetical protein LOC100383891	DNA binding;nucleus;DNA binding;nucleus;DNA binding;nucleus	Znf_C5HC2; FYrich_N; FYrich_C; FYrich_N_sg; FYrich_C_sg	Eukaryota
2	GRMZM2G077621			0.2753	0.5922	0.9094	0.8012	1.0347	0.3469	0.0755	0.4401	no	yes	no	NA	NA	NA	DUF668	Embryophyta
2	GRMZM2G159427			7.2287	4.863	11.3591	9.9304	10.63	3.5071	3.3407	6.814	yes	no	no	NA	NA	NA	WD40_repeat_sg; WD40_repeat-like_dom; WD40_repeat; WD40_repeat_CS; G-protein_beta_WD-40_rep_reg; Tubby_N; Gprotein_B	Eukaryota
2	GRMZM2G155954			23.2905	33.8889	46.8445	47.0642	58.443	34.1451	25.5602	38.37	no	no	no	LOC100273111 (pco155237), mRNA	LOC100273111;LOC100273111;LOC100273111;LOC100273111	homoiothermy;ice binding;response to freezing;homoiothermy;ice binding;response to freezing;homoiothermy;ice binding;response to freezing;homoiothermy;ice binding;response to freezing;homoiothermy;ice binding;response to freezing	IQ_motif_EF-hand-BS; Antifreeze_1	Embryophyta
2	GRMZM2G336962			4.2907	5.9487	11.198	13.0977	14.1504	4.0039	2.4313	4.8919	no	yes	yes	NA	NA	NA	Bromodomain	Eukaryota
2	GRMZM5G898898			0.2108	0.5177	1.0474	1.0733	1.6222	0.3423	0.1524	0.4898	no	yes	no	NA	NA	nucleotide binding;protein binding;ATP binding;apoptosis;defense response;nucleoside-triphosphatase activity	NB-ARC; Leu-rich_rpt; ATPase_AAA+_core; Disease_R	Poaceae
2	GRMZM2G056773			2.925	1.6406	8.3203	9.3184	11.6023	1.3735	0.6268	1.5451	no	no	no	NA	NA	NA	LsmAD_domain; LSM_related_domain; LSM_domain_euk/arc	Eukaryota
2	GRMZM2G113382			5.2304	5.7007	8.5287	9.0374	8.132	4.0275	1.9571	5.8195	no	yes	no	hypothetical protein LOC100279275 (LOC100279275), mRNA;hypothetical protein LOC100279275 (LOC100279275), mRNA	NA	NA	NA	Magnoliophyta
2	AC212068.4_FG005			1.3537	1.342	1.8452	1.5857	2.7288	0.5242	0.5585	0.7057	no	no	no	hypothetical protein LOC100273453 (LOC100273453), mRNA	hypothetical protein LOC100273453	lipid metabolic process;hydrolase activity, acting on ester bonds	Lipase_GDSL	Magnoliophyta
2	GRMZM2G096458			19.6761	21.4065	31.0997	35.3688	44.6517	13.7449	17.5601	10.9669	yes	yes	no	hypothetical protein LOC100277214 (LOC100277214), mRNA;hypothetical protein LOC100277214 (LOC100277214), mRNA	NA	NA	Tropomyosin	Eukaryota
2	GRMZM2G352891			14.1121	16.292	20.7165	30.1676	30.4363	1.8759	1.9787	4.4367	no	yes	no	NA	NA	nucleic acid binding;protein binding;zinc ion binding;nucleic acid binding;nucleic acid binding	RRM_RNP1; RNA-recognition_dom1	Eukaryota
2	GRMZM2G165963			2.601	2.7944	6.2986	6.1087	7.7125	1.853	0.7623	2.9429	no	no	no	hypothetical protein LOC100274809 (LOC100274809), mRNA	hypothetical protein LOC100274809	NA	Pentatricopeptide_repeat	Tracheophyta
2	GRMZM2G412524			18.3483	24.6436	32.746	38.3105	34.2523	16.7602	11.7086	24.1312	no	yes	no	NA	NA	protein kinase activity;protein serine/threonine kinase activity;ATP binding;protein amino acid phosphorylation;protein kinase activity;protein serine/threonine kinase activity;ATP binding;protein amino acid phosphorylation	Se/Thr_prot_kinase-like_dom; Ser-Thr/Tyr-Pkinase; Kinase-like_dom; Tyr_Pkinase_cat_dom; Ser/Thr_prot_kinase_dom; Ser/Thr_prot_kinase_AS	Viridiplantae
2	GRMZM2G091560			2.0959	3.7968	6.8788	8.2327	8.1288	2.8681	1.9482	4.4283	no	yes	yes	hypothetical protein LOC100381695 (LOC100381695), mRNA	hypothetical protein LOC100381695	translation;ligase activity;carbon-nitrogen ligase activity, with glutamine as amido-N-donor;translation;ligase activity	Gln-tRNA_amidoTrfase_suB/E_N	Eukaryota
2	GRMZM2G072658			3.9669	5.0153	10.0124	9.2363	10.6111	1.8841	1.7517	2.329	no	yes	yes	NA	NA	protein kinase activity;protein serine/threonine kinase activity;protein binding;ATP binding;protein amino acid phosphorylation	Leu-rich_rpt; Se/Thr_prot_kinase-like_dom; Ser-Thr/Tyr-Pkinase; Kinase-like_dom; Tyr_Pkinase_cat_dom; Ser/Thr_prot_kinase_dom; Protein_kinase_ATP_BS; Ser/Thr_prot_kinase_AS	Viridiplantae
2	GRMZM2G162859			4.4786	3.3257	6.7364	9.0637	9.9105	1.5924	1.0804	2.5193	no	no	no	NA	NA	DNA binding;protein binding;nucleus;transcription;oxidoreductase activity;transcription regulator activity;oxidation reduction;DNA binding;protein binding;nucleus;transcription;oxidoreductase activity;transcription regulator activity;oxidation reduction	BAH_dom; TFIIS_N; TFIIS/elonginA/CRSP70_N; AldOxase/xan_DH_Mopterin-bd; TFIIS/CRSP70_N_sub	Embryophyta
2	GRMZM2G106265			2.8583	2.9763	3.964	4.0761	5.2479	2.4979	1.2372	3.3259	no	no	no	NA	NA	NA	NA	Eukaryota
2	GRMZM2G045421			4.1791	6.8262	7.298	7.8363	8.2094	3.6164	2.3242	4.7508	no	no	no	NA	NA	structural molecule activity;cell adhesion;actin cytoskeleton	PWWP; Vinculin	Magnoliophyta
2	GRMZM2G309899			4.8669	3.0128	12.2923	10.1567	12.4509	2.3411	0.5663	2.3859	yes	no	no	NA	NA	nucleic acid binding;zinc ion binding	Znf_CCHC	Zea mays
2	GRMZM2G069106			3.5627	3.8356	6.6649	6.9105	6.6788	2.2103	1.1439	3.3903	no	no	no	hypothetical protein LOC100273872 (LOC100273872), mRNA	hypothetical protein LOC100273872	intracellular;zinc ion binding;intracellular;zinc ion binding	Znf_RanBP2	Embryophyta
2	GRMZM2G035985			11.7719	14.0939	28.2693	32.6063	37.1455	6.4374	4.0415	9.0393	no	yes	no	LOC100279874 (TIDP2729), mRNA	LOC100279874	DNA binding;ATP binding;nucleus;regulation of transcription, DNA-dependent;DNA binding;ATP binding;nucleus;regulation of transcription, DNA-dependent	WD40_repeat_sg; WD40_repeat-like_dom; Terpenoid_synth; WD40_repeat; WD40_repeat_CS; G-protein_beta_WD-40_rep_reg	Eukaryota
2	GRMZM2G099797			3.2666	3.0667	7.1476	7.4844	7.3803	2.7235	1.8436	4.0438	no	yes	yes	response regulator 8 (RR8), mRNA	response regulator 8;response regulator 8;response regulator 8	two-component response regulator activity;two-component signal transduction system (phosphorelay);regulation of transcription, DNA-dependent;two-component response regulator activity;two-component signal transduction system (phosphorelay);regulation of transcription, DNA-dependent;two-component response regulator activity;two-component signal transduction system (phosphorelay);regulation of trans…	Sig_transdc_resp-reg_receiver; CheY-like	Viridiplantae
2	GRMZM2G154811			3.1876	2.9697	15.876	13.4732	14.9445	1.158	1.0477	2.3059	no	no	no	NA	NA	NA	NA	Eukaryota
2	GRMZM2G140587			2.0711	2.7116	6.049	6.2885	6.8448	1.016	0.8664	2.1408	no	yes	no	NA	NA	hydrolase activity;hydrolase activity	GDA1_CD39_NTPase	Eukaryota
2	GRMZM2G077320			2.8763	2.7328	3.3507	2.9582	3.3319	2.4285	1.4359	3.3608	no	no	no	hypothetical protein LOC100216817 (LOC100216817), mRNA	hypothetical protein LOC100216817	racemase and epimerase activity, acting on amino acids and derivatives	Pentatricopeptide_repeat; Asp/Glu_racemase_AS	Tracheophyta
2	GRMZM2G338493			1.1554	2.8799	5.2326	4.9315	5.8933	1.487	1.7537	1.4737	no	yes	yes	NA	NA	NA	NA	Eukaryota
2	GRMZM2G143205			6.2726	6.382	10.2965	12.1186	13.7507	3.8207	1.844	4.767	no	no	no	hypothetical protein LOC100193150 (LOC100193150), mRNA	hypothetical protein LOC100193150;hypothetical protein LOC100193150	calmodulin binding;nucleus;transcription regulator activity;regulation of transcription;calmodulin binding;nucleus;transcription regulator activity;regulation of transcription	CG-1; IQ_motif_EF-hand-BS; Ankyrin_rpt-contain_dom	Eukaryota
2	GRMZM2G032337			4.7611	6.3185	12.0869	13.4761	14.9726	4.4695	3.1637	7.0152	no	no	no	NA	NA	protein kinase activity;protein serine/threonine kinase activity;ATP binding;protein amino acid phosphorylation;response to stress;protein kinase activity;protein serine/threonine kinase activity;ATP binding;protein amino acid phosphorylation;protein kinase activity;protein serine/threonine kinase activity;ATP binding;protein amino acid phosphorylation	Se/Thr_prot_kinase-like_dom; Ser-Thr/Tyr-Pkinase; Kinase-like_dom; Tyr_Pkinase_cat_dom; Ser/Thr_prot_kinase_dom; Protein_kinase_ATP_BS; Ser/Thr_prot_kinase_AS	Embryophyta
2	GRMZM2G372632			0.5001	0.4869	0.8835	0.9706	1.4408	0.5487	0.217	0.5566	no	no	no	NA	NA	NA	Pentatricopeptide_repeat	Viridiplantae
2	GRMZM2G477872			0.5968	0.667	1.3465	1.516	1.6106	0.3048	0.1566	0.5128	no	no	no	NA	NA	nucleotide binding;ATP binding;membrane;ATPase activity;nucleoside-triphosphatase activity	ABC_transporter-like; ABC_2_trans; PDR_assoc; ATPase_AAA+_core; ABC_transporter_CS	Eukaryota
2	GRMZM2G145104			15.1656	17.1982	24.8645	26.3492	30.9209	10.6223	6.8866	13.9924	no	no	no	hypothetical protein LOC100384569 (LOC100384569), mRNA	NA	zinc ion binding;heme transporter activity;heme transport;membrane;cytochrome complex assembly	Znf_C3HC4_RING-type; Znf_RING-CH; Cyt_c_biogenesis_CcmF	Eukaryota
2	GRMZM2G360517			11.9499	13.281	33.8833	27.4386	27.8158	10.6812	5.3064	12.687	no	no	no	hypothetical protein LOC100381721 (LOC100381721), mRNA	hypothetical protein LOC100381721	NA	NA	Tracheophyta
2	GRMZM2G047152			0.7042	1.1033	1.5616	1.4994	1.7081	0.9544	0.4244	1.2212	no	yes	no	NA	NA	protein binding;ATP binding;apoptosis;defense response	NB-ARC; Leu-rich_rpt; Disease_R	Magnoliophyta
2	GRMZM2G087712			3.223	4.8452	15.3106	16.6196	18.259	3.4714	1.594	3.5149	yes	yes	yes	hypothetical protein LOC100280230 (LOC100280230), mRNA;hypothetical protein LOC100280230 (LOC100280230), mRNA	hypothetical protein LOC100280230	rRNA processing;small-subunit processome	WD40_repeat-like_dom	Eukaryota
2	GRMZM2G006080			10.3033	22.5461	25.1455	26.1525	31.2912	14.1137	9.6221	18.6014	no	yes	no	NA	NA	protein kinase activity;protein serine/threonine kinase activity;ATP binding;protein amino acid phosphorylation	Se/Thr_prot_kinase-like_dom; Ser-Thr/Tyr-Pkinase; Kinase-like_dom; Tyr_Pkinase_cat_dom; Ser/Thr_prot_kinase_dom; Protein_kinase_ATP_BS; Ser/Thr_prot_kinase_AS	Embryophyta
2	GRMZM2G044744			1.4928	1.9596	1.9685	2.0293	3.2142	0.7198	0.5585	0.8391	no	no	no	starch synthase IV (LOC100170236), mRNA	starch synthase IV	starch synthase activity;biosynthetic process;glucan biosynthetic process	Starch_synth_cat_dom; Glyco_trans_1; GlgA	Eukaryota
2	GRMZM2G059891			5.1237	5.6856	6.3484	7.0426	8.0977	3.1243	2.085	4.2065	no	no	no	hypothetical protein LOC100383234 (LOC100383234), mRNA	hypothetical protein LOC100383234	membrane;homoiothermy;ice binding;response to freezing	DUF221; Antifreeze_1	Tracheophyta
2	GRMZM2G036685			10.2264	6.7569	10.5017	9.949	10.0425	4.218	3.1235	6.3013	no	no	no	hypothetical protein LOC100193544 (LOC100193544), mRNA	hypothetical protein LOC100193544	ATP binding;ATP binding	ATPase_a/bsu_AS	Embryophyta
2	GRMZM2G448104			7.8645	8.5745	15.2452	19.2471	23.0866	4.4014	3.0423	6.4385	no	yes	no	hypothetical protein LOC100272535 (LOC100272535), mRNA	hypothetical protein LOC100272535;hypothetical protein LOC100272535	DNA binding	Myb_DNA-bd; DIRP; Homeodomain-like; SANT_DNA-bd	Eukaryota
2	AC230011.2_FG002			0.7385	1.0692	1.3805	1.7508	1.8307	0.3836	0.2004	0.6297	no	no	no	NA	NA	protein binding;ATP binding;apoptosis;defense response	NB-ARC; Leu-rich_rpt; Leu-rich_rpt_typical-subtyp; Disease_R	Embryophyta
2	GRMZM2G073312			2.7705	2.9421	6.5018	8.9831	9.1138	1.5612	0.8727	2.0402	no	yes	no	NA	NA	catalytic activity;metalloendopeptidase activity;proteolysis;zinc ion binding;metal ion binding	Pept_M16_N; Peptidase_M16_C; Metalloenz_metal-bd	Viridiplantae
2	GRMZM2G052658			1.7537	1.936	9.6926	6.1028	9.3824	0.8077	0.5736	1.4204	no	no	no	NA	NA	protein kinase activity;protein serine/threonine kinase activity;ATP binding;protein amino acid phosphorylation	OPR_PB1; Se/Thr_prot_kinase-like_dom; Ser-Thr/Tyr-Pkinase; Kinase-like_dom; Tyr_Pkinase_cat_dom; Ser/Thr_prot_kinase_dom; Protein_kinase_ATP_BS; Ser/Thr_prot_kinase_AS	Eukaryota
2	GRMZM2G049954			1.1724	0.8025	3.0911	3.5914	4.8534	0.6518	0.2178	0.7317	no	no	no	NA	NA	binding	ARM-type_fold	Embryophyta
2	GRMZM2G306806			12.7701	11.5368	25.8732	29.7419	31.4258	7.5484	5.6093	12.8615	no	no	no	LOC100194401 (pco140761), mRNA	LOC100194401;LOC100194401;LOC100194401	NA	NA	Tracheophyta
2	GRMZM2G180166			3.1978	2.3418	3.7834	4.9564	5.5287	1.8281	0.5905	1.4716	no	no	no	NA	NA	ubiquitin thiolesterase activity;intracellular;ubiquitin-dependent protein catabolic process	Peptidase_C12	Embryophyta
2	GRMZM2G366146			0.501	0.6192	0.8289	0.8169	1.3333	0.2367	0.1642	0.2483	no	no	no	NA	NA	nucleotide binding;ATP binding;membrane;ATPase activity;nucleoside-triphosphatase activity	ABC_2_trans; PDR_assoc; ABC_transporter-like; ATPase_AAA+_core	Eukaryota
2	GRMZM2G474092			1.2757	2.0641	3.1499	4.0917	4.1702	1.5482	0.7489	1.3517	no	no	yes	hypothetical protein LOC100276434 (LOC100276434), mRNA	hypothetical protein LOC100276434	binding;ATP binding;apoptosis;defense response	NB-ARC; ARM-type_fold; Disease_R	Tracheophyta
2	GRMZM2G095326			2.6637	2.2828	10.3786	8.4878	15.7874	1.1901	0.393	1.111	no	yes	no	NA	NA	oxygen transporter activity;binding;transport	ARM-type_fold; Hemocyanin_Cu	Eukaryota
2	GRMZM2G402088			6.9046	4.9373	11.1275	12.7549	14.2157	3.6173	0.7704	4.1534	no	no	no	NA	NA	nucleotide binding;protein binding;ATP binding;zinc ion binding;nucleoside-triphosphatase activity	ATPase_AAA_core; Znf_PHD; ATPase_AAA+_core; ATPase_AAA_CS; CbxX_CfqX	Eukaryota
2	GRMZM2G060337			0.955	1.0315	2.2192	2.5635	2.5937	1.0245	0.4265	0.9993	no	no	no	NA	NA	NA	Pentatricopeptide_repeat	Magnoliophyta
2	GRMZM2G019874			1.4864	1.751	3.8729	3.751	4.6433	1.1142	0.3731	1.1608	no	no	no	NA	NA	NA	Pentatricopeptide_repeat	Embryophyta
2	GRMZM2G085078			4.8322	4.0414	12.5763	12.6935	12.8744	3.6518	1.9067	5.6538	no	no	no	NA	NA	flavin-containing monooxygenase activity;iron ion binding;glutamate biosynthetic process;nitrogen compound metabolic process;metabolic process;FMN binding;glutamate synthase activity;oxidoreductase activity;oxidoreductase activity, acting on the CH-NH2 group of donors, NAD or NADP as acceptor;glutamate synthase activity, NADH or NADPH as acceptor;FAD binding;NADP or NADPH binding;oxidation reduct…	GATase_2; Glu_synth_centr_N; Glu_synth_centr_C; Glu_synthase_C; Pyr_OxRdtase_NAD-bd; FAD_pyr_nucl-diS_OxRdtase; GOGAT_euk; Pyridine_nuc-diS_OxRdtase_2; Flavin_mOase; Glut_synth_sub1	Eukaryota
2	GRMZM2G094599			3.7918	6.0578	5.7852	4.9167	6.3274	4.0999	2.8403	5.6858	no	no	no	NA	NA	binding	Armadillo; ARM-type_fold	Embryophyta
2	GRMZM2G014452			17.3009	19.2221	27.1817	27.9908	33.3912	12.2023	7.3207	14.7701	no	no	no	hypothetical protein LOC100383526 (LOC100383526), mRNA	hypothetical protein LOC100383526	NA	NA	Eukaryota
2	GRMZM2G316740			0.6635	0.3424	1.9572	3.1067	2.8614	0.3402	0.0752	0.3056	no	no	no	NA	NA	NA	NA	Embryophyta
2	GRMZM2G358877			4.4973	3.2425	20.7319	19.196	22.3999	5.6027	1.3985	3.6333	yes	yes	no	NA	NA	protein binding	Nucleoporin_Nup133/Nup155_N	Embryophyta
2	GRMZM2G330907			0.5097	0.5086	1.4328	1.3901	1.6099	0.2589	0.1501	0.3213	no	no	no	leucine-rich repeat transmembrane protein kinase 2 (ltk2), mRNA	leucine-rich repeat transmembrane protein kinase 2	protein kinase activity;protein serine/threonine kinase activity;protein binding;ATP binding;protein amino acid phosphorylation	LRR-contain_N2; Leu-rich_rpt; Se/Thr_prot_kinase-like_dom; Ser-Thr/Tyr-Pkinase; Kinase-like_dom; Leu-rich_rpt_typical-subtyp; Tyr_Pkinase_cat_dom; Ser/Thr_prot_kinase_dom; Protein_kinase_ATP_BS	Embryophyta
2	AC233870.1_FG004			3.2275	4.0717	5.5216	4.6435	6.112	4.2835	1.9537	3.2701	no	no	no	hypothetical protein LOC100216954 (LOC100216954), mRNA	hypothetical protein LOC100216954	voltage-gated potassium channel activity;potassium ion transport;voltage-gated potassium channel complex	K_chnl_volt-dep_Kv9	Magnoliophyta
2	AC233961.1_FG001			18.1962	17.5891	29.564	31.9667	36.6304	7.6603	3.1091	11.0081	yes	no	no	LOC100280164 (sdg101), mRNA	LOC100280164	chromatin;DNA binding;nucleus;regulation of transcription, DNA-dependent;zinc ion binding;chromatin modification;histone-lysine N-methyltransferase activity	AT_hook_DNA-bd_motif; SRA_YDG; Pre-SET_dom; SET_dom; Pre-SET_Zn-bd_sub; Post-SET_dom; AT_hook-like; HMGI/HMGY	Embryophyta
2	GRMZM2G051782			0.4935	1.6944	4.5793	3.4271	5.2094	0.9499	0.4861	0.657	no	no	no	NA	NA	GTPase activity;structural molecule activity;GTP binding;cytoplasm;microtubule;microtubule-based process;microtubule-based movement;protein complex;protein polymerization	Tubulin_FtsZ_GTPase; Tubulin/FtsZ_2-layer-sand-dom; Tub_FtsZ_C; Tubulin_CS; Beta-tubulin_BS; Alpha_tubulin; Tubulin; Epsilon_tubulin; Beta_tubulin; Delta_tubulin; Gamma_tubulin; Cell_division_FtsZ_N	Eukaryota
2	GRMZM2G110398			6.6373	9.8922	9.5904	13.566	9.7694	6.1369	5.3033	6.9424	no	yes	yes	NA	NA	structural molecule activity;tight junction;structural molecule activity;tight junction	DUF803; Claudin5	Eukaryota
2	GRMZM2G126691			11.3662	10.2573	20.0582	18.1013	19.2479	9.9757	6.403	12.8351	no	no	no	hypothetical protein LOC100383427 (LOC100383427), mRNA	hypothetical protein LOC100383427	RNA binding;RNA processing	Splice_fac_sup-white-apricot	Eukaryota
2	GRMZM2G029077			8.7953	11.3869	18.0638	21.639	27.7348	7.4391	3.2547	7.797	no	yes	no	LOC100285218 (pco149758), mRNA	LOC100285218	binding;protein binding;intracellular protein transport;protein transporter activity;protein transport;vesicle-mediated transport;membrane coat;clathrin adaptor complex	Clathrin/coatomer_adapt-like_N; Clathrin_b-adaptin_app_sub_C; ARM-type_fold; Calthrin/coatomer_app_sub_C; AP_complex_bsu	Eukaryota
2	GRMZM2G335720			7.5269	9.0992	14.7316	10.7229	13.6646	2.9451	2.3051	3.632	no	no	no	NA	NA	protein binding;zinc ion binding	Znf_PHD-finger; Znf_FYVE_PHD; Bromodomain; Znf_PHD; Znf_RING; Zinc_finger_PHD-type_CS	Eukaryota
2	GRMZM2G132712			9.7482	7.9866	15.6392	14.6166	16.8147	4.6258	3.3273	5.0851	no	no	no	hypothetical protein LOC100383276 (LOC100383276), mRNA	hypothetical protein LOC100383276;hypothetical protein LOC100383276	catalytic activity;calcium-transporting ATPase activity;ATP binding;ATP biosynthetic process;cation transport;calcium ion transport;metabolic process;calcium ion transmembrane transporter activity;ATPase activity, coupled to transmembrane movement of ions, phosphorylative mechanism;membrane;ATP binding;ATP biosynthetic process;cation transport;ATPase activity, coupled to transmembrane movement of…	ATPase_P-typ_cation-transptr_N; ATPase_P-typ_ATPase-assoc-dom; Dehalogen-like_hydro; ATPase_P-typ_cation-transptr_C; ATPase_P-typ_ion-transptr; ATPase_P-typ_H-transp; ATPase_P-typ_cation-exchng_asu; ATPase_P-typ_P_site; ATPase_P-typ_Ca-transp_PMCA	Eukaryota
2	GRMZM2G001895			5.3406	5.1099	11.5608	14.0988	19.4621	2.2479	1.2767	3.0554	no	no	no	hypothetical protein LOC100272361 (LOC100272361), mRNA	hypothetical protein LOC100272361	binding;heat shock protein binding	DnaJ_N; ARM-type_fold; GYF	Eukaryota
2	GRMZM2G471529			6.6695	6.5655	9.7193	11.4337	14.6075	4.6074	1.6892	6.3341	no	no	no	NA	histidine kinase 2	two-component sensor activity;two-component response regulator activity;two-component signal transduction system (phosphorelay);voltage-gated chloride channel activity;ATP binding;regulation of transcription, DNA-dependent;chloride transport;signal transduction;membrane;phosphorylation;transferase activity, transferring phosphorus-containing groups;transmembrane transport	CHASE; Sig_transdc_His_kin_sub1_dim/P; ATPase-like_ATP-bd; Sig_transdc_resp-reg_receiver; CheY-like; Sig_transdc_His_kin-like_C; Cl-channel_volt-gated	Eukaryota
2	AC193379.3_FG001			0.0875	0.0847	0.4135	0.2955	0.3561	0.0203	0.0085	0.0294	no	no	no	NA	NA	protein kinase activity;protein serine/threonine kinase activity;ATP binding;protein amino acid phosphorylation	LRR-contain_N2; Se/Thr_prot_kinase-like_dom; Ser-Thr/Tyr-Pkinase; Kinase-like_dom; Tyr_Pkinase_cat_dom; Ser/Thr_prot_kinase_dom; Protein_kinase_ATP_BS; Ser/Thr_prot_kinase_AS	Embryophyta
2	GRMZM2G164854			10.6951	12.2733	18.3502	22.6963	24.4402	6.343	4.0168	8.5879	no	no	no	hypothetical protein LOC100383852 (LOC100383852), mRNA	hypothetical protein LOC100383852	NA	WD40_repeat-like_dom	Embryophyta
2	GRMZM2G084540			21.1755	18.5211	43.1307	36.4873	45.4659	16.3899	10.2138	16.8774	no	no	no	NA	NA	RNA binding;RNA binding;RNA binding	KH_type_1_subgr; KH	Embryophyta
2	AC197122.3_FG003			4.9893	3.7371	10.8685	14.2467	18.4069	3.7478	1.3198	3.5336	no	yes	no	NA	NA	nucleus;transcription regulator activity;regulation of transcription	Not_N; CCR4-NOT_su3/5	Eukaryota
2	GRMZM2G124096			6.8428	8.9805	11.1039	13.9262	16.558	4.507	2.5893	5.4424	no	yes	no	NA	NA	NA	Staph_toxin	Eukaryota
2	GRMZM2G012932			1.589	1.0895	6.7791	5.3805	6.7675	0.9781	0.365	1.327	no	no	no	NA	NA	NA	OPR_PB1; Kinase-like_dom	Eukaryota
2	GRMZM2G106766			7.7582	8.2706	11.0677	11.1521	13.4896	3.1021	2.5737	3.9219	no	yes	no	NA	NA	NA	Fibronectin_III_dom	Tracheophyta
2	AC152495.1_FG003			1.1132	0.9787	3.452	3.0095	3.6295	0.6393	0.5406	1.1834	no	no	no	NA	NA	protein binding;ATP binding;apoptosis;defense response	NB-ARC; Leu-rich_rpt; Leu-rich_rpt_typical-subtyp; Disease_R	Poaceae
2	GRMZM2G018573			1.4412	0.9138	1.8469	1.5434	3.0069	1.431	0.6213	1.1788	no	no	no	hypothetical protein LOC100279118 (LOC100279118), mRNA	hypothetical protein LOC100279118	NA	NA	Eukaryota
2	GRMZM2G422464			5.7811	4.0699	9.4787	13.1645	13.7491	2.0391	1.4344	3.9288	no	no	no	hypothetical protein LOC100280151 (LOC100280151), mRNA	hypothetical protein LOC100280151	DNA binding;catalytic activity;DNA repair;base-excision repair;DNA binding;catalytic activity;endonuclease activity;DNA repair;base-excision repair;4 iron, 4 sulfur cluster binding	AT_hook_DNA-bd_motif; HhH-GPD_domain; Endouclease3_FeS-loop_motif; DNA_glycosylase; Carboh/pur_kinase_PfkB_CS	Eukaryota
2	AC203841.3_FG009			4.7988	10.9984	13.0844	15.5595	18.0988	8.5407	5.0519	6.4665	no	yes	yes	CAB2 (LOC100281582), mRNA	CAB2	NA	Per1	Eukaryota
2	GRMZM2G137984			4.828	6.3062	12.0655	12.6955	15.7103	4.0571	1.5499	3.9908	no	yes	no	NA	NA	protein binding;retrograde transport, endosome to Golgi	Vps54	Eukaryota
2	GRMZM2G402309			1.6571	1.7008	5.9357	4.8398	5.4982	1.2111	0.4865	1.108	no	no	no	NA	NA	NA	Reg_chr_condens; Znf_FYVE; Reg_csome_cond/b-lactamase_inh	Eukaryota
2	GRMZM2G087495			1.4924	2.0745	3.547	2.9665	3.139	1.5889	0.7012	1.5271	no	no	no	hypothetical protein LOC100191397 (LOC100191397), mRNA	hypothetical protein LOC100191397	NA	Pentatricopeptide_repeat	Embryophyta
2	GRMZM2G157820	mez1	enhancer of zeste1	7.2221	11.051	18.8731	21.0985	23.4066	5.7976	3.9118	8.0855	no	yes	no	enhancer of zeste1 (mez1), mRNA	enhancer of zeste1	DNA binding	SET_dom; SANT_DNA-bd	Eukaryota
2	GRMZM2G160619			4.6258	5.055	8.586	7.3928	8.2406	4.0087	2.6329	5.6756	no	no	no	hypothetical protein LOC100384510 (LOC100384510), mRNA	hypothetical protein LOC100384510	protein kinase activity;protein serine/threonine kinase activity;protein binding;ATP binding;protein amino acid phosphorylation	Leu-rich_rpt; Ser-Thr/Tyr-Pkinase; Kinase-like_dom; Leu-rich_rpt_typical-subtyp; Tyr_Pkinase_cat_dom; Ser/Thr_prot_kinase_dom	Embryophyta
2	GRMZM2G144890			1.9643	5.668	7.9567	7.5669	9.0364	4.1822	2.5637	4.2835	no	yes	yes	hypothetical protein LOC100273889 (LOC100273889), mRNA	hypothetical protein LOC100273889	nucleic acid binding	RRM_RNP1	Eukaryota
2	GRMZM2G327263			1.7486	1.5514	2.2292	2.4259	3.5474	0.8589	0.7989	1.3796	no	no	no	NA	NA	proteolysis;cysteine-type peptidase activity;proteolysis;cysteine-type peptidase activity;proteolysis;cysteine-type peptidase activity	Peptidase_C48	Poaceae
2	GRMZM2G178758			4.7405	5.2448	9.1364	10.1306	12.9715	2.1882	1.8261	3.2291	no	no	no	NA	NA	NA	Homeodomain-like; Tropomyosin	Magnoliophyta
2	GRMZM2G161310			0.3373	0.8125	8.8057	3.9001	9.7685	1.6434	0.7154	1.4945	no	yes	no	hypothetical protein LOC100273965 (LOC100273965), mRNA	hypothetical protein LOC100273965	tetracycline:hydrogen antiporter activity;tetracycline transport;integral to membrane;response to antibiotic;transmembrane transport	NA	Eukaryota
2	GRMZM2G149230			3.6387	4.5163	9.4983	9.0248	9.2565	4.2691	2.5994	5.2053	no	no	no	NA	NA	DNA binding;transcription factor TFIID complex;transcription initiation;transcription initiation factor activity;DNA binding;transcription factor TFIID complex;transcription initiation;transcription initiation factor activity	TFIID_sub; Histone-fold	Eukaryota
2	GRMZM2G021471			1.7563	2.346	3.0504	3.6848	4.4594	1.3509	0.6583	0.9397	no	no	no	NA	NA	NA	NA	Tracheophyta
2	GRMZM2G113137	cesa6	cellulose synthase6	9.7489	20.617	25.4761	23.7981	29.559	10.7241	7.0217	13.6771	no	yes	yes	cellulose synthase6 (cesa6), mRNA	cellulose synthase6	protein binding;zinc ion binding;membrane;cellulose synthase (UDP-forming) activity;cellulose biosynthetic process	Cellulose_synth; Znf_RING	Embryophyta
2	GRMZM5G826456			6.6411	7.0621	13.6735	12.6833	14.397	3.0181	1.8805	3.3229	no	yes	yes	NA	NA	NA	NA	Magnoliophyta
2	GRMZM2G002825			55.7505	114.789	135.987	128.446	141.048	113.398	89.3696	83.7859	no	no	no	actin-depolymerizing factor 3 (LOC100280568), mRNA	actin-depolymerizing factor 3	actin binding;intracellular	Actin-bd_cofilin/tropomyosin; ADF/Cofilin/Destrin	Eukaryota
2	GRMZM2G162443			1.7562	2.2863	2.5067	2.7851	3.8536	1.6255	0.696	1.7138	no	no	no	NA	NA	NA	DUF593	Embryophyta
2	GRMZM2G164160			7.7026	8.5076	12.1782	12.3623	15.3864	4.262	2.6741	6.0773	no	no	no	hypothetical protein LOC100382597 (LOC100382597), mRNA;hypothetical protein LOC100382597 (LOC100382597), mRNA	hypothetical protein LOC100382597;hypothetical protein LOC100382597	protein kinase activity;protein serine/threonine kinase activity;ATP binding;protein amino acid phosphorylation	Kinase-like_dom	Eukaryota
2	GRMZM2G161175			8.5525	14.9742	16.6637	15.1794	15.3344	10.7223	5.6439	14.8888	no	no	no	NA	NA	NA	Pentatricopeptide_repeat	Magnoliophyta
2	GRMZM2G007848			6.31	6.6231	9.1055	11.9428	12.423	3.4571	1.9802	4.3144	no	no	no	NA	NA	protein kinase activity;protein serine/threonine kinase activity;MAP kinase activity;ATP binding;protein amino acid phosphorylation;protein kinase activity;protein serine/threonine kinase activity;MAP kinase activity;ATP binding;protein amino acid phosphorylation	Se/Thr_prot_kinase-like_dom; Ser-Thr/Tyr-Pkinase; Kinase-like_dom; Tyr_Pkinase_cat_dom; Ser/Thr_prot_kinase_dom; Protein_kinase_ATP_BS; MAP_kinase_CS; Erk_3_4_MAPK	Viridiplantae
2	GRMZM2G133249			4.0883	3.4801	7.6386	8.8246	10.256	4.4448	1.8145	4.1941	no	no	no	NA	NA	catalytic activity;metalloendopeptidase activity;proteolysis;zinc ion binding;metal ion binding	Pept_M16_N; Peptidase_M16_C; Metalloenz_metal-bd; Pept_M16_Zn_BS	Eukaryota
2	GRMZM2G146115			19.4647	22.9167	33.7667	48.8405	40.9127	17.8952	12.7644	13.6763	no	yes	yes	GTP-binding protein PTD004 (LOC100283841), mRNA	GTP-binding protein PTD004	GTP binding;intracellular;GTP binding;intracellular	DUF933; TGS-like	Eukaryota
2	GRMZM2G137118			2.2877	1.5132	3.3107	3.6714	4.1436	1.0988	0.7161	1.5444	no	no	no	NA	NA	protein kinase activity;protein serine/threonine kinase activity;ATP binding;protein amino acid phosphorylation;protein kinase activity;protein serine/threonine kinase activity;ATP binding;protein amino acid phosphorylation	Se/Thr_prot_kinase-like_dom; Ser-Thr/Tyr-Pkinase; Kinase-like_dom; Tyr_Pkinase_cat_dom; Ser/Thr_prot_kinase_dom; Protein_kinase_ATP_BS; Ser/Thr_prot_kinase_AS	Eukaryota
2	GRMZM2G039683			4.844	6.2591	10.0618	8.8169	10.7068	2.4077	2.1677	3.2831	no	no	no	hypothetical protein LOC100280239 (LOC100280239), mRNA	hypothetical protein LOC100280239	NA	NA	Eukaryota
2	GRMZM2G103475			2.6905	3.764	7.3871	5.7614	7.0284	3.0163	1.3679	3.3492	no	no	no	NA	NA	NA	Pentatricopeptide_repeat	NA
2	GRMZM2G047949			10.1538	14.8079	43.8397	32.5793	41.0328	11.2224	4.5722	12.41	no	yes	no	NA	NA	nucleotide binding;nucleic acid binding;helicase activity;ATP binding;ATP-dependent helicase activity;hydrolase activity, acting on acid anhydrides, in phosphorus-containing anhydrides;nucleoside-triphosphatase activity	RNA_helicase_ATP-dep_SK12/DOB1; DNA/RNA_helicase_DEAD/DEAH_N; DNA/RNA_helicase_C; DSH_C; DEAD-like_N; ATPase_AAA+_core; EF_Hand_1_Ca_BS	Eukaryota
2	GRMZM2G156145			19.3502	25.889	36.1883	37.5134	47.6626	10.2008	6.0846	13.4341	no	no	no	NA	NA	proteasome complex;binding;ATP binding;peptide transporter activity;peptide transport;membrane;enzyme regulator activity;regulation of protein catabolic process	NA	Eukaryota
2	GRMZM2G078360			4.5142	4.9091	11.6032	16.7427	17.453	2.7568	1.7404	3.7842	yes	yes	no	hypothetical protein LOC100304369 (LOC100304369), mRNA;hypothetical protein LOC100304369 (LOC100304369), mRNA	hypothetical protein LOC100304369;hypothetical protein LOC100304369	small conjugating protein ligase activity;post-translational protein modification;regulation of protein metabolic process;small conjugating protein ligase activity;post-translational protein modification;regulation of protein metabolic process	UBQ-conjugat_E2; UBQ-conjugat/RWD-like	Eukaryota
2	GRMZM2G136800			31.1014	36.9901	47.1529	45.8377	48.8745	34.2117	23.5021	47.4599	no	no	no	LOC100275601 (pco078885), mRNA	LOC100275601	homoiothermy;ice binding;response to freezing	DUF23; Antifreeze_1	Embryophyta
2	GRMZM2G086287			6.086	7.0726	9.9611	10.6376	11.4295	2.6212	2.054	3.9475	no	no	no	hypothetical protein LOC100383349 (LOC100383349), mRNA	hypothetical protein LOC100383349	NA	NA	Embryophyta
2	AC234160.1_FG001			6.9876	7.0597	22.2471	16.4123	20.3466	8.0498	3.2065	9.1407	no	no	yes	NA	NA	nucleus;regulation of transcription, DNA-dependent	PAH	NA
2	GRMZM2G416498			0.839	1.2956	3.564	3.5436	4.1478	0.9845	0.4957	1.0611	no	yes	no	NA	NA	NA	Pentatricopeptide_repeat	Embryophyta
2	GRMZM2G306348			2.1239	3.1138	7.4263	7.2277	8.058	1.9319	1.1469	2.4603	no	no	no	NA	NA	nucleic acid binding;helicase activity;ATP binding;DNA recombination;ATP-dependent helicase activity	DNA/RNA_helicase_DEAD/DEAH_N; DNA/RNA_helicase_C; DEAD-like_N; DNA_helicase_ATP-dep_RecQ_N	Eukaryota
2	GRMZM2G031718			1.5827	1.613	2.9553	3.6131	3.4756	0.8299	0.4042	1.0384	no	no	no	NA	NA	NA	Pentatricopeptide_repeat	Embryophyta
2	GRMZM2G147158			2.3888	4.9286	4.8333	5.1371	5.2576	2.6488	3.4862	3.2871	no	no	no	NA	NA	NA	NA	Magnoliophyta
2	GRMZM2G085409			4.1532	3.898	7.4868	8.9729	11.6735	1.6705	0.779	2.0253	no	no	no	hypothetical protein LOC100217254 (LOC100217254), mRNA	hypothetical protein LOC100217254;hypothetical protein LOC100217254	intracellular;signal transduction	NA	Embryophyta
2	GRMZM2G129311			2.2515	1.9911	7.0752	5.7441	5.6921	1.6162	0.7678	1.8562	no	no	no	hypothetical protein LOC100381780 (LOC100381780), mRNA	hypothetical protein LOC100381780	zinc ion binding;zinc ion binding	TF_FAR1-related; MULE_transposase_cons-dom; Znf_SWIM; Znf_PMZ	Magnoliophyta
2	GRMZM2G349875			2.3025	2.4738	4.0886	3.905	4.3158	1.5888	0.742	1.7648	no	no	no	NA	NA	protein kinase activity;protein serine/threonine kinase activity;protein binding;ATP binding;protein amino acid phosphorylation;dicarboxylic acid transport;defense response;membrane;sodium:dicarboxylate symporter activity	LRR-contain_N2; Leu-rich_rpt; Se/Thr_prot_kinase-like_dom; Ser-Thr/Tyr-Pkinase; Kinase-like_dom; Leu-rich_rpt_typical-subtyp; Tyr_Pkinase_cat_dom; Ser/Thr_prot_kinase_dom; Disease_R; Na-dicarboxylate_symporter; Protein_kinase_ATP_BS; Ser/Thr_prot_kinase_AS	Embryophyta
2	GRMZM2G703307			1.5571	3.3586	3.9931	4.0252	4.8149	2.0096	1.4723	2.1372	no	no	no	hypothetical protein LOC100275687 (LOC100275687), mRNA	hypothetical protein LOC100275687	NA	NA	Magnoliophyta
2	GRMZM2G479110			9.757	8.5862	15.4206	13.3544	17.1174	5.5697	3.661	8.1604	no	no	no	LOC100274010 (cl3986_1), mRNA	LOC100274010	two-component response regulator activity;two-component signal transduction system (phosphorelay);regulation of transcription, DNA-dependent	Sig_transdc_resp-reg_receiver; Myb_DNA-bd; CheY-like; Homeodomain-like; Response_reg_B-typ_pln; Myb-like+DNA-bd_dom_SHAQKYF	Viridiplantae
2	GRMZM2G168679			2.8371	1.4911	4.6177	4.3057	5.6143	1.5406	0.5522	1.7896	no	no	no	NA	NA	NA	Pentatricopeptide_repeat	Embryophyta
2	GRMZM2G432566			6.6914	7.6077	19.7034	15.9888	17.6092	4.0659	2.7179	5.7847	no	no	no	hypothetical protein LOC100383253 (LOC100383253), mRNA	hypothetical protein LOC100383253	protein binding;intracellular;zinc ion binding	Znf_RING; Znf_C2H2-like; Znf_C2H2	Eukaryota
2	GRMZM2G417496			0.8428	0.1808	1.79	2.3953	2.9188	0.1409	0	0.1637	no	no	no	NA	NA	NA	Tensin_phosphatase_C2-dom; C2_Ca/lipid-bd_dom_CaLB	Eukaryota
2	GRMZM2G081919			2.7067	2.7428	4.2056	4.5669	5.0759	3.9568	1.9035	2.8028	no	yes	yes	LOC100285081 (pco131231), mRNA	LOC100285081;LOC100285081;LOC100285081;LOC100285081;LOC100285081;LOC100285081	DNA binding;DNA binding;DNA binding;DNA binding;DNA binding;DNA binding	Myb_DNA-bd; Homeodomain-like; SANT_DNA-bd	Eukaryota
2	GRMZM2G361847			5.6423	6.2448	7.6066	9.3891	9.5154	4.1883	2.9741	7.743	no	no	no	hypothetical protein LOC100279481 (LOC100279481), mRNA	hypothetical protein LOC100279481	DNA binding;transcription factor activity;nucleus;regulation of transcription, DNA-dependent;sequence-specific DNA binding;protein dimerization activity;DNA binding;transcription factor activity;nucleus;regulation of transcription, DNA-dependent;sequence-specific DNA binding;protein dimerization activity;DNA binding;transcription factor activity;nucleus;regulation of transcription, DNA-dependent;…	bZIP_2; TF_bZIP; Leuzip_CREB	Embryophyta
2	GRMZM2G092072			0.1323	0.3914	1.0011	1.0908	0.9079	0.706	0.7533	0.6282	no	no	yes	NA	NA	peptidyl-prolyl cis-trans isomerase activity;protein folding	PPIase_cyclophilin; Cyclophilin-like; Pep-Pro_Isoase_cyclophilin_CS	Zea mays
2	GRMZM2G108741			5.7345	5.8629	10.3485	12.9922	15.2516	5.3973	1.9317	5.7746	no	no	no	NA	NA	NA	NA	Poaceae
2	GRMZM2G054765			6.7582	8.5045	12.2729	16.0765	15.8715	5.5545	2.73	4.9552	no	yes	no	NA	NA	DNA binding;DNA-directed DNA polymerase activity;binding;transcription	DNA_pol_V; ARM-type_fold	Eukaryota
2	GRMZM2G030578			4.943	5.0545	11.5488	12.3337	12.8921	3.0033	1.9542	4.2399	no	yes	no	NA	NA	binding;binding	Exportin-1/Importin-b-like; ARM-type_fold	Eukaryota
2	GRMZM5G836886			8.1637	8.0224	29.031	22.9779	25.9929	13.9172	8.6763	18.97	no	no	no	hypothetical protein LOC100382797 (LOC100382797), mRNA	NA	ATP binding;ATP biosynthetic process;cation transport;ATPase activity, coupled to transmembrane movement of ions, phosphorylative mechanism;membrane;hydrolase activity, acting on acid anhydrides, catalyzing transmembrane movement of substances;ATP binding;ATP biosynthetic process;ATPase activity, coupled to transmembrane movement of ions, phosphorylative mechanism;membrane;hydrolase activity, act…	ATPase_P-typ_ATPase-assoc-dom; ATPase_P-typ_P_site; ATPase_P-typ_ion-transptr	Eukaryota
2	GRMZM2G056103			15.3862	16.2305	37.78	41.4513	42.877	11.3471	7.8639	21.9916	no	no	no	NA	NA	NA	NA	Viridiplantae
2	GRMZM2G421690			1.1607	1.8957	4.0387	3.8585	4.2611	1.514	0.6799	1.2183	no	no	no	hypothetical protein LOC100192076 (LOC100192076), mRNA;GTP binding protein (LOC100281670), mRNA	hypothetical protein LOC100192076;GTP binding protein	NA	Pentatricopeptide_repeat	Magnoliophyta
2	GRMZM2G012319			7.7726	10.2345	21.9806	27.6042	30.6287	5.1269	3.6531	7.9822	yes	yes	no	hypothetical protein LOC100274171 (LOC100274171), mRNA;hypothetical protein LOC100274171 (LOC100274171), mRNA	hypothetical protein LOC100274171;hypothetical protein LOC100274171	binding;binding	SH3_domain; ARM-type_fold; SH3_region	Embryophyta
2	GRMZM2G012761			5.0314	5.9353	10.872	12.9597	15.15	2.549	1.6515	3.782	no	yes	no	hypothetical protein LOC100280286 (LOC100280286), mRNA	hypothetical protein LOC100280286	intracellular;zinc ion binding	DUF618; ENTH_VHS; RNA_polymerase_II_lsu_CTD; Znf_C2H2	Eukaryota
2	GRMZM2G370081			1.7494	1.5456	3.8242	3.0781	5.0514	0.3885	0.5984	2.5809	no	no	yes	NA	NA	proteinaceous extracellular matrix;metallopeptidase activity;zinc ion binding	Pept_M12B_ADAM-TS2	Magnoliophyta
2	AC214602.3_FG012			1.1793	2.1169	2.387	2.4631	2.7937	0.653	0.2844	0.7081	no	no	no	NA	NA	protein binding	Leu-rich_rpt; Leu-rich_rpt_typical-subtyp; Leu-rich_rpt_Cys-con_subtyp	Embryophyta
2	GRMZM2G126338			16.8226	16.521	35.5046	29.042	30.9775	7.6799	4.8509	10.9116	no	no	no	hypothetical protein LOC100383052 (LOC100383052), mRNA	hypothetical protein LOC100383052	NA	YTH_domain	Eukaryota
2	GRMZM5G851026			9.0522	9.4954	22.3664	17.9349	19.3938	4.3622	3.688	4.7318	no	no	no	NA	NA	NA	NA	Eukaryota
2	GRMZM2G142150			2.2696	2.2532	7.3205	7.0831	7.2751	3.3265	2.3922	6.7888	no	yes	no	hypothetical protein LOC100383444 (LOC100383444), mRNA	hypothetical protein LOC100383444	NA	NA	Eukaryota
2	GRMZM2G129232			1.7666	3.5601	4.1273	3.3563	5.7472	1.862	1.2105	2.1194	no	no	no	NA	NA	NA	NA	NA
2	GRMZM2G004468			6.4483	6.0361	15.0784	17.8633	15.8564	4.6004	3.0228	6.9427	no	no	no	hypothetical protein LOC100194228 (LOC100194228), mRNA	hypothetical protein LOC100194228	protein kinase activity;protein serine/threonine kinase activity;ATP binding;protein amino acid phosphorylation;protein kinase activity;protein serine/threonine kinase activity;ATP binding;protein amino acid phosphorylation;protein kinase activity;protein serine/threonine kinase activity;ATP binding;protein amino acid phosphorylation;protein kinase activity;protein serine/threonine kinase activit…	Se/Thr_prot_kinase-like_dom; Ser-Thr/Tyr-Pkinase; Kinase-like_dom; Tyr_Pkinase_cat_dom; Ser/Thr_prot_kinase_dom; Protein_kinase_ATP_BS; Ser/Thr_prot_kinase_AS	Eukaryota
2	GRMZM2G406674			34.3485	41.0908	47.8495	58.4812	74.2882	21.147	12.8794	29.356	no	no	no	calmodulin binding protein (LOC100282586), mRNA;calmodulin binding protein (LOC100282586), mRNA	calmodulin binding protein;calmodulin binding protein	NA	IQ_motif_EF-hand-BS	Tracheophyta
2	GRMZM5G893913			6.4478	5.3008	9.4278	13.5163	13.856	3.3426	1.1919	3.8319	no	no	no	LOC100216949 (si945040c06), mRNA	LOC100216949	NA	Dev_and_cell_death_domain	Embryophyta
2	GRMZM2G164916			6.4296	7.7116	12.0097	12.47	13.866	2.9926	2.7735	5.4476	no	no	no	methyltransferase (LOC100281416), mRNA	methyltransferase;methyltransferase;methyltransferase	NA	DUF248_MeTrfase	Embryophyta
2	GRMZM2G137894			1.1691	0.7223	3.2784	3.9499	2.9264	1.5065	0.6561	2.0493	no	no	no	NA	NA	NA	Pentatricopeptide_repeat	Tracheophyta
2	GRMZM2G098606			5.5074	6.6589	10.0943	8.2761	11.3875	6.5654	2.7169	4.0686	no	no	no	NA	NA	NA	NA	Zea mays
2	GRMZM2G032475			2.7602	2.7654	9.6589	7.8444	7.9009	2.1846	1.1755	2.6013	no	no	no	hypothetical protein LOC100381756 (LOC100381756), mRNA	hypothetical protein LOC100381756	NA	NA	Viridiplantae
2	GRMZM5G864266			6.0769	5.7583	16.24	18.1424	20.3158	3.0147	2.1171	3.9978	no	yes	no	hypothetical protein LOC100383827 (LOC100383827), mRNA	hypothetical protein LOC100383827	double-stranded DNA binding;ubiquitin thiolesterase activity;DNA topological change;ubiquitin-dependent protein catabolic process	MATH; Peptidase_C19; TRAF-like; SASP_alpha/beta-type_CS; Pept_C19ubi-hydrolase_C_CS	Eukaryota
2	GRMZM2G305321			3.3233	2.1744	7.0955	7.7888	10.0266	1.6852	0.5747	1.6268	no	no	no	NA	NA	protein kinase activity;protein serine/threonine kinase activity;ATP binding;protein amino acid phosphorylation	NA	Eukaryota
2	GRMZM2G103841			5.4136	5.7362	8.3785	7.4624	8.628	2.9813	1.5484	4.7964	no	no	no	hypothetical protein LOC100383473 (LOC100383473), mRNA	hypothetical protein LOC100383473;hypothetical protein LOC100383473	NA	DUF594	Magnoliophyta
2	GRMZM2G446052			0.1361	0.2654	3.6317	4.0803	4.1163	0.4987	0.8419	1.2912	no	no	no	NA	NA	NA	NA	Viridiplantae
2	GRMZM2G044143			2.6223	2.7506	11.906	14.3257	19.3791	2.1598	0.6867	1.9626	yes	yes	no	NA	NA	homoiothermy;ice binding;response to freezing	Beige_BEACH; WD40_repeat_sg; WD40_repeat-like_dom; ConA-like_lec_gl; WD40_repeat; Antifreeze_1	Eukaryota
2	AC218457.2_FG013			3.3955	3.699	9.3534	11.9414	14.3825	1.8067	0.9173	2.535	no	no	no	NA	NA	NA	Bromodomain	Eukaryota
2	GRMZM2G017164			2.0299	2.6608	3.1714	3.7687	3.8771	0.8392	0.4966	1.2704	no	no	no	NA	NA	protein kinase activity;protein serine/threonine kinase activity;ATP binding;sugar binding;protein amino acid phosphorylation	B_lectin_man-bd; Se/Thr_prot_kinase-like_dom; Ser-Thr/Tyr-Pkinase; Kinase-like_dom; Pan_app; Ser/Thr_prot_kinase_dom; Tyr_Pkinase_cat_dom; Protein_kinase_ATP_BS; Ser/Thr_prot_kinase_AS	Tracheophyta
2	GRMZM5G836250			0.0432	0.2274	1.045	0.7062	1.4001	0.3553	0.307	0.6278	no	no	no	LOC100273700 (pco073762), mRNA	LOC100273700	carbohydrate metabolic process;phosphoric ester hydrolase activity;inositol or phosphatidylinositol phosphatase activity;carbohydrate metabolic process;phosphoric ester hydrolase activity;inositol or phosphatidylinositol phosphatase activity;carbohydrate metabolic process;phosphoric ester hydrolase activity	Fructose_bisphosphatase_class1; Fructose_bisphosphatase_AS; Fructose_bisphosphatase; Inositol_monophosphatase	Eukaryota
2	GRMZM2G178787			8.4744	9.4931	15.3862	14.9642	18.9719	10.0517	4.383	11.9045	yes	no	no	hypothetical protein LOC100191980 (LOC100191980), mRNA;serine/threonine-protein kinase NAK (LOC100281417), mRNA	hypothetical protein LOC100191980;serine/threonine-protein kinase NAK	protein kinase activity;protein serine/threonine kinase activity;ATP binding;protein amino acid phosphorylation;protein kinase activity;protein serine/threonine kinase activity;ATP binding;protein amino acid phosphorylation;protein kinase activity;protein serine/threonine kinase activity;ATP binding;protein amino acid phosphorylation	Se/Thr_prot_kinase-like_dom; Ser-Thr/Tyr-Pkinase; Kinase-like_dom; Tyr_Pkinase_cat_dom; Ser/Thr_prot_kinase_dom; Protein_kinase_ATP_BS; Ser/Thr_prot_kinase_AS	Magnoliophyta
2	GRMZM2G143071			7.5175	6.7939	7.9487	10.5405	11.2683	2.6883	1.9042	3.8512	no	no	no	hypothetical protein LOC100383507 (LOC100383507), mRNA	hypothetical protein LOC100383507	DNA binding;transcription factor activity;transcription initiation;regulation of transcription, DNA-dependent;sigma factor activity	NA	Embryophyta
2	GRMZM2G066485			0.6249	0.6768	2.1233	2.1184	2.4153	0.3396	0.225	0.5996	no	no	no	NA	NA	catalytic activity;metabolic process;catalytic activity;metabolic process	PLipase_D/transphosphatidylase	Eukaryota
2	GRMZM2G071448			1.8865	2.2891	2.6073	2.9806	3.8618	1.7282	0.646	2.1597	no	no	no	NA	NA	NA	WD40_repeat_sg; WD40_repeat-like_dom; WD40_repeat; WD40_repeat_CS; G-protein_beta_WD-40_rep_reg	Eukaryota
2	GRMZM2G088930			4.56	4.6777	6.7604	7.6607	8.085	3.2872	1.6414	3.7084	no	no	no	NA	NA	NA	NA	Poaceae
2	GRMZM2G345840			9.1411	10.0613	12.5574	11.8206	12.4355	4.5177	3.8398	6.8019	no	no	no	hypothetical protein LOC100192718 (LOC100192718), mRNA;hypothetical protein LOC100192718 (LOC100192718), mRNA	hypothetical protein LOC100192718	NA	C2_Ca-dep; C2_Ca/lipid-bd_dom_CaLB; C2_region	Embryophyta
2	GRMZM2G020865			0.2638	0.5178	1.6775	1.833	3.0571	0.4118	0.0304	0.5154	no	no	no	NA	NA	NA	NA	Eukaryota
2	GRMZM2G074267			5.3545	11.0083	15.5464	17.8868	19.6721	15.8948	7.9369	12.2605	no	no	no	NA	NA	integral to membrane;transmembrane transport	Auxin_eff; Auxin_eff_plant	Embryophyta
2	GRMZM2G700955			0.307	0.2087	0.5135	0.4215	0.4901	0.2515	0.0485	0.3159	no	yes	no	NA	NA	NA	NA	Panicoideae
2	GRMZM2G124701			2.9633	1.5308	3.5662	4.1921	6.1493	0.8898	0.7977	1.692	no	no	no	C-terminal zinc-finger (LOC100281720), mRNA	C-terminal zinc-finger;C-terminal zinc-finger	protein binding;zinc ion binding;protein binding;zinc ion binding	Znf_C3HC4_RING-type; Znf_RING-CH; Znf_RING	Embryophyta
2	GRMZM2G028813			4.5323	5.114	9.9567	10.1768	14.7929	4.72	4.1252	5.8399	no	no	no	NA	NA	NA	IQ_motif_EF-hand-BS	Embryophyta
2	GRMZM2G105245			0.2435	0.3644	0.4995	0.3591	0.4697	0.1127	0.1638	0.2781	no	no	no	NA	NA	metabolic process;oxidoreductase activity	MaoC_deHydtase	Eukaryota
2	AC196465.3_FG006			2.0155	1.6957	7.5784	7.2992	10.2134	1.2701	0.4043	1.1609	no	yes	no	NA	NA	NA	DDT_dom; DDT_dom_subgr	Viridiplantae
2	GRMZM2G365374			28.7569	33.5003	53.18	55.3445	51.4509	25.1054	13.1621	27.2986	no	no	no	heat shock 70 kDa protein (LOC100286241), mRNA	heat shock 70 kDa protein	ATP binding;protein folding;unfolded protein binding;ATP binding	Hsp_70; Heat_shock_70_CS; Hsp70	Eukaryota
2	GRMZM2G051055			13.1727	22.3609	23.9292	21.0306	29.4669	18.2223	8.4803	13.6368	no	yes	no	NA	NA	protein kinase activity;protein serine/threonine kinase activity;ATP binding;protein amino acid phosphorylation	Kinase-like_dom; Ser/Thr_prot_kinase_dom; Protein_kinase_ATP_BS; Ser/Thr_prot_kinase_AS	Eukaryota
2	GRMZM2G469111			51.8556	73.7742	125.959	120.758	131.289	58.8118	33.0221	80.1192	no	no	no	LOC100281207 (pco114025), mRNA	LOC100281207	integral to membrane	EMP70	Eukaryota
2	GRMZM2G166658			3.2352	6.2887	14.5668	18.012	24.5609	2.4771	2.6767	6.9893	no	yes	yes	NA	NA	protein kinase activity;protein serine/threonine kinase activity;ATP binding;protein amino acid phosphorylation;signal transduction;protein kinase activity;protein serine/threonine kinase activity;ATP binding;protein amino acid phosphorylation;signal transduction	Se/Thr_prot_kinase-like_dom; Ser-Thr/Tyr-Pkinase; NAF_dom; Kinase-like_dom; Tyr_Pkinase_cat_dom; Ser/Thr_prot_kinase_dom; Protein_kinase_ATP_BS; Ser/Thr_prot_kinase_AS	Magnoliophyta
2	GRMZM2G096092			5.5292	5.8975	16.0987	15.1382	19.2991	5.8375	2.6189	8.4382	no	yes	no	hypothetical protein LOC100280166 (LOC100280166), mRNA	hypothetical protein LOC100280166	microtubule cytoskeleton organization;spindle pole;microtubule organizing center	Spc97_Spc98	Eukaryota
2	GRMZM2G117369			9.0307	7.0926	9.5329	11.803	12.7311	3.2306	2.7278	4.5341	no	no	no	LOC100273608 (si618066c08), mRNA	LOC100273608	catalytic activity;FAD binding;catalytic activity;oxidoreductase activity;FAD binding;catalytic activity;oxidoreductase activity;FAD binding	Oxid_FAD_bind_N; FAD-linked_oxidase_C; FAD-bd_2; FAD-linked_Oxase-like_C	Eukaryota
2	GRMZM2G162086			2.4424	3.4311	4.5212	3.5469	4.5423	1.4306	1.1889	2.5198	no	no	no	NA	NA	protein kinase activity;protein serine/threonine kinase activity;ATP binding;protein amino acid phosphorylation;protein kinase activity;protein serine/threonine kinase activity;ATP binding;protein amino acid phosphorylation	Se/Thr_prot_kinase-like_dom; Ser-Thr/Tyr-Pkinase; Kinase-like_dom; Tyr_Pkinase_cat_dom; Ser/Thr_prot_kinase_dom; Protein_kinase_ATP_BS; Ser/Thr_prot_kinase_AS	Eukaryota
2	GRMZM2G100152			3.1543	4.4937	8.5093	7.424	7.3591	2.7415	1.3516	3.1944	no	no	no	LEC14B (LOC100281565), mRNA	LEC14B	NA	NA	Eukaryota
2	GRMZM2G060516			3.5979	2.4878	5.2493	3.9976	4.5728	1.6626	0.767	1.9945	no	no	no	hypothetical protein LOC100275629 (LOC100275629), mRNA	hypothetical protein LOC100275629	NA	Pentatricopeptide_repeat	Magnoliophyta
2	GRMZM2G459642			6.7713	5.7568	9.6029	13.496	14.0309	3.3643	1.997	2.9803	no	no	no	NA	NA	NA	NA	Viridiplantae
2	GRMZM2G057674			6.9575	6.6591	8.8901	9.597	11.4781	3.0491	3.2972	4.4779	no	no	no	hypothetical protein LOC100274107 (LOC100274107), mRNA	hypothetical protein LOC100274107	aminopeptidase activity;proteolysis;aminopeptidase activity;proteolysis	Ubiquitin-int_motif; Peptidase_S33	Viridiplantae
2	GRMZM2G160005			2.0792	2.048	6.2476	5.8629	6.1214	1.353	0.6454	2.1242	no	no	no	NA	NA	DNA binding;nucleus;regulation of transcription, DNA-dependent;response to hormone stimulus;regulation of transcription	TF_B3; Auxin_resp	Embryophyta
2	GRMZM2G025860			1.1173	1.6547	1.9344	1.7831	2.0713	0.8772	0.4003	0.9525	no	no	no	hypothetical protein LOC100383898 (LOC100383898), mRNA	hypothetical protein LOC100383898	nucleotide binding;ATP binding;transport;integral to membrane;ATPase activity;nucleoside-triphosphatase activity;ATPase activity, coupled to transmembrane movement of substances;transmembrane transport	ABC_transptr_TM_dom; ABC_transporter-like; ABC_transptrTM_dom_typ1; ATPase_AAA+_core; ABC_transporter_CS	Embryophyta
2	GRMZM2G085713			3.4096	8.9483	15.5669	15.3933	13.3392	8.1692	3.9371	4.1895	yes	yes	yes	hypothetical protein LOC100191309 (LOC100191309), mRNA	hypothetical protein LOC100191309	NA	Vacuolar_import/degrad_Vid24	Eukaryota
2	GRMZM2G099862			30.537	67.701	106.902	99.3014	111.58	32.3144	32.4198	49.673	no	no	no	LOC100125640 (pco080442), mRNA	LOC100125640	hormone activity;ATP binding;extracellular region;nucleus;hydrolase activity, acting on acid anhydrides, in phosphorus-containing anhydrides;regulation of transcription;ATP binding;nucleus;hydrolase activity, acting on acid anhydrides, in phosphorus-containing anhydrides;regulation of transcription;ATP binding;nucleus;hydrolase activity, acting on acid anhydrides, in phosphorus-containing anhydri…	Gln-Leu-Gln_QLQ; WRC	Embryophyta
2	GRMZM2G431291			0.1693	0.1217	0.3823	0.4209	0.4955	0.056	0.0801	0.1135	no	no	no	NA	NA	DNA binding;protein kinase activity;protein serine/threonine kinase activity;ATP binding;protein amino acid phosphorylation;DNA binding;protein kinase activity;protein serine/threonine kinase activity;ATP binding;protein amino acid phosphorylation	SNF2_N; Ser-Thr/Tyr-Pkinase; Kinase-like_dom; Tyr_Pkinase_cat_dom; Ser/Thr_prot_kinase_dom; Ser/Thr_prot_kinase_AS	Magnoliophyta
2	GRMZM2G471108			0.5242	0.5436	0.6902	0.6168	0.9359	0.1407	0.1486	0.278	no	no	no	NA	NA	transcription factor activity;motor activity;ATP binding;regulation of transcription, DNA-dependent;myosin complex;sequence-specific DNA binding;transcription factor activity;motor activity;ATP binding;regulation of transcription, DNA-dependent;myosin complex;sequence-specific DNA binding	Myosin_N; Myosin_head_motor_dom; IQ_motif_EF-hand-BS; Dil_domain; TF_bZIP	Embryophyta
2	GRMZM2G024533			4.7235	5.5364	5.7944	6.8552	8.1726	2.5701	1.1991	3.0971	no	no	no	hypothetical protein LOC100193885 (LOC100193885), mRNA	hypothetical protein LOC100193885	NA	NA	Eukaryota
2	GRMZM2G088014			4.1458	4.2039	9.5156	12.8472	15.7115	1.5232	1.2966	2.5309	no	no	no	NA	NA	NA	WD40_repeat-like_dom	Magnoliophyta
2	GRMZM2G010054			8.4541	15.0538	36.9179	32.9339	39.2246	7.1931	4.3684	8.9412	yes	yes	no	hypothetical protein LOC100384351 (LOC100384351), mRNA	hypothetical protein LOC100384351	structural molecule activity;protein binding;intracellular protein transport;vesicle-mediated transport;membrane coat;COPI vesicle coat	Coatomer_alpha_subunit; WD40_repeat_sg; Coatomer_WD-assoc_reg; Coatomer_asu_C; WD40_repeat-like_dom; Quino_amine_DH_bsu; WD40_repeat; G-protein_beta_WD-40_rep_reg; WD40_repeat_CS	Eukaryota
2	GRMZM2G067460			5.4055	12.2603	11.862	11.4713	11.0205	5.5242	5.4399	9.233	no	yes	yes	hypothetical protein LOC100381788 (LOC100381788), mRNA	NA	NA	F-box_dom_cyclin-like; F-box_dom_Skp2-like; Leu-rich_rpt_Cys-con_subtyp	Eukaryota
2	GRMZM2G022188			0.8425	1.1693	5.8254	5.1748	9.1837	0.5863	0.443	1.093	no	no	no	NA	NA	NA	WD40_repeat_sg; WD40_repeat-like_dom; WD40_repeat; WD40_repeat_CS; G-protein_beta_WD-40_rep_reg; Gprotein_B	Eukaryota
2	GRMZM2G176630			6.2536	5.0144	12.1953	12.786	13.4164	3.2096	3.1857	7.0389	yes	no	yes	NA	NA	sugar binding;protein amino acid glycosylation;galactosyltransferase activity;membrane;homoiothermy;ice binding;response to freezing	Galectin_CRD; Glyco_trans_31; ConA-like_lec_gl; Antifreeze_1	Eukaryota
2	GRMZM2G028980			9.3204	16.5455	30.7533	35.1203	39.1858	10.5165	7.1846	17.5093	no	no	no	NA	NA	DNA binding;nucleus;regulation of transcription, DNA-dependent;response to hormone stimulus;regulation of transcription	NA	Embryophyta
2	GRMZM2G134982			5.4459	6.0271	8.3934	7.0545	8.3494	4.2459	1.9337	3.7863	no	no	no	NA	NA	GTPase activity;GTP binding	ProtSyn_GTP-bd; Transl_elong_EFG/EF2_C; Ribosomal_S5_D2-typ_fold; Elongation_fac_G/III/V; Transl_elong_init/rib_B-barrel	Eukaryota
2	GRMZM2G061884			0.3096	0.5969	1.802	2.2121	1.8317	0.7137	0.3724	0.5961	no	no	yes	NA	NA	NA	NA	Tracheophyta
2	GRMZM2G314661			6.8146	7.1215	10.9753	10.067	12.9183	3.3254	1.7565	3.4501	no	no	no	NA	NA	protein binding;zinc ion binding	DDT_dom; Znf_PHD-finger; Znf_FYVE_PHD; DDT_dom_subgr; Znf_PHD; Znf_RING; Zinc_finger_PHD-type_CS	Embryophyta
2	GRMZM2G146267			5.6123	5.3149	11.1326	13.8435	15.7548	1.9438	1.4533	3.4379	no	no	no	NA	NA	protein binding;zinc ion binding;nucleic acid binding;protein binding;zinc ion binding	RRM_RNP1; Znf_RING; RNA-recognition_dom1	Eukaryota
2	GRMZM2G106531			0.3445	0.3463	0.5942	0.6795	0.9235	0.2743	0.1633	0.4446	no	no	no	carotenoid isomerase 2 (CRTISO2), mRNA	NA	response to stress;carotenoid biosynthetic process;isomerase activity;oxidation reduction	NA	Eukaryota
2	GRMZM5G825978			2.3143	4.8006	7.5565	8.5485	8.534	4.7237	2.9369	3.4787	no	no	no	hypothetical protein LOC100381979 (LOC100381979), mRNA	hypothetical protein LOC100381979	NA	NA	NA
2	GRMZM2G080746			22.002	20.6795	28.2539	36.3422	36.3936	9.3914	9.3412	18.2279	no	no	no	hypothetical protein LOC100381768 (LOC100381768), mRNA	hypothetical protein LOC100381768	magnesium ion binding;inorganic diphosphatase activity;nucleus;cytoplasm;phosphate metabolic process;gene silencing;phosphopantetheine binding;magnesium ion binding;inorganic diphosphatase activity;nucleus;cytoplasm;phosphate metabolic process;gene silencing;phosphopantetheine binding	Sas10/Utp3/C1D; Sas10_C; PPantetheine_attach_site; Pyrophosphatase	Eukaryota
2	GRMZM2G141258			2.2875	2.4719	6.1967	6.5013	7.6949	1.0344	0.5395	1.4384	no	yes	no	NA	NA	chromatin;nucleic acid binding;DNA binding;chromatin binding;helicase activity;ATP binding;nucleus;chromatin assembly or disassembly	Chromodomain; SNF2_N; DNA/RNA_helicase_C; Homeodomain-like; DEAD-like_N	Eukaryota
2	GRMZM2G171428			3.267	1.458	3.7632	3.965	3.6061	1.8552	2.0005	3.569	no	no	no	NA	NA	transcription factor activity;sequence-specific DNA binding;regulation of transcription;transcription factor activity;sequence-specific DNA binding;regulation of transcription	WRKY_DNA-bd	Embryophyta
2	GRMZM2G147532			8.4224	12.1076	29.1343	22.6021	26.8975	9.7684	4.4665	9.557	no	no	no	NA	NA	NA	NA	Andropogoneae
2	GRMZM2G022383			13.838	10.9486	26.3433	25.306	27.4525	5.1512	3.5764	7.6732	no	no	no	NA	NA	protein phosphatase type 2A complex;signal transduction;protein phosphatase type 2A regulator activity;protein phosphatase type 2A complex;signal transduction;protein phosphatase type 2A regulator activity	WD40_repeat_sg; WD40_repeat-like_dom; WD40_repeat; WD40_repeat_CS; G-protein_beta_WD-40_rep_reg; PP2A_PR55	Embryophyta
2	GRMZM2G043183			0.6453	1.3405	1.794	2.6291	2.1262	0.5739	0.473	0.8683	no	no	no	NA	NA	NA	Vps52	Eukaryota
2	GRMZM2G070381			1.0313	1.4013	1.7768	2.0634	2.2473	0.4217	0.4165	0.6479	no	yes	no	NA	NA	NA	Pentatricopeptide_repeat	Magnoliophyta
2	GRMZM2G070885			3.5303	4.9755	7.2539	5.836	6.8422	3.264	1.6419	4.213	no	yes	no	NA	NA	zinc ion binding	TF_JmjC; Znf_FYVE_PHD; TF_JmjC_AAH	Eukaryota
2	GRMZM2G039600			8.1535	8.4298	10.2959	8.6633	10.4079	3.7651	1.6785	2.7493	no	no	no	NA	NA	NA	NA	commelinids
2	GRMZM2G017404			2.7691	5.2492	7.2088	8.6694	9.8919	2.6975	1.7831	3.6985	no	no	no	hypothetical protein LOC100381718 (LOC100381718), mRNA	hypothetical protein LOC100381718	protein binding	BTB_POZ; BTB/POZ_fold; TRAF-like; BTB/POZ-like	Eukaryota
2	GRMZM5G834734			1.365	4.8822	9.5595	9.4172	11.8111	3.6079	3.3055	2.5421	no	yes	yes	LOC100274011 (cl859_2), mRNA	NA	NA	NA	NA
2	GRMZM2G032602			0.3542	0.2243	0.3378	0.2812	0.4321	0.2441	0.0748	0.2348	no	no	no	NA	NA	nucleotide binding;protein binding;ATP binding;apoptosis;defense response;nucleoside-triphosphatase activity	NB-ARC; Leu-rich_rpt; ATPase_AAA+_core; Leu-rich_rpt_typical-subtyp; Disease_R	Magnoliophyta
2	GRMZM2G070633			1.5176	1.6456	2.8786	3.4207	4.1727	1.0067	0.6825	1.4694	no	yes	no	hypothetical protein LOC100279778 (LOC100279778), mRNA	hypothetical protein LOC100279778	NA	NA	Embryophyta
2	GRMZM2G311165			44.1688	66.6066	104.036	86.8589	92.2112	50.8875	24.896	62.6918	no	no	no	LOC100193668 (IDP1614), mRNA	LOC100193668	cation transport;sodium ion transport;regulation of pH;solute:hydrogen antiporter activity;sodium:hydrogen antiporter activity;integral to membrane;transmembrane transport;cation transport;sodium ion transport;regulation of pH;solute:hydrogen antiporter activity;sodium:hydrogen antiporter activity;integral to membrane;transmembrane transport;cation transport;sodium ion transport;regulation of pH;…	NA	Zea mays
2	GRMZM2G334584			1.4402	1.2039	2.8631	3.7843	3.6811	0.4736	0.3846	1.2078	no	no	no	NA	NA	nucleotide binding;ATP binding;apoptosis;defense response;nucleoside-triphosphatase activity	NB-ARC; ATPase_AAA+_core; Disease_R	Embryophyta
2	AC209877.3_FG002			2.8215	3.3729	7.3936	9.4506	11.3129	2.7715	0.9027	2.5454	no	yes	no	NA	NA	lysosphingolipid and lysophosphatidic acid receptor activity;G-protein coupled receptor protein signaling pathway;integral to membrane	EDG6_rcpt	Magnoliophyta
2	GRMZM2G406712			5.6461	6.9833	13.2326	15.0936	18.5267	3.9724	1.6711	4.4614	no	no	no	NA	NA	phosphoprotein phosphatase activity;intracellular;nucleus	NIF; BRCT; FCP1_euk	Eukaryota
2	GRMZM2G102601			4.2889	6.92	7.9077	9.3712	12.7024	3.4016	2.3729	3.6759	no	yes	no	NA	NA	two-component sensor activity;ATP binding;signal transduction;membrane;phosphorylation;transferase activity, transferring phosphorus-containing groups	GAF; Sig_transdc_His_kin_sub1_dim/P; ATPase-like_ATP-bd; Sig_transdc_His_kin-like_C	Embryophyta
2	GRMZM5G894518			1.1222	1.2641	1.7431	2.1814	2.4675	1.2088	0.5692	1.1086	no	no	no	NA	NA	ubiquitin thiolesterase activity;ubiquitin-dependent protein catabolic process	Peptidase_C19; Pept_C19ubi-hydrolase_C_CS	Eukaryota
2	GRMZM2G094699			13.0073	18.8423	31.6703	29.8085	31.8675	16.9995	7.2075	17.0883	no	no	no	hypothetical protein LOC100384159 (LOC100384159), mRNA	hypothetical protein LOC100384159	structural molecule activity;binding;protein binding;intracellular protein transport;vesicle-mediated transport;membrane coat;COPI vesicle coat	NA	Eukaryota
2	GRMZM2G173770			3.8088	1.3354	7.299	5.1454	7.0001	1.0647	0.8462	1.7958	no	no	no	NA	NA	nucleic acid binding;protein binding;zinc ion binding;nucleic acid binding;protein binding;zinc ion binding	SAP_DNA-bd; Znf_FYVE_PHD; Znf_PHD; Zinc_finger_PHD-type_CS	Eukaryota
2	GRMZM2G440820			0.6954	1.6882	2.7366	3.0499	2.4427	2.169	1.8016	1.2101	no	no	no	NA	NA	cellular process	Pept_M24_structural-domain	Eukaryota
2	GRMZM2G178294			35.5822	43.0151	60.9208	48.6929	53.6369	12.7863	9.1405	14.5246	no	no	no	hypothetical protein LOC100304428 (LOC100304428), mRNA	hypothetical protein LOC100304428	intracellular;RNA processing;intracellular;RNA processing;intracellular;RNA processing	HAT	Eukaryota
2	GRMZM2G149224			4.6013	6.6535	14.6283	13.4363	12.9645	9.9935	6.3756	8.9194	no	yes	yes	sterol-4-alpha-carboxylate 3-dehydrogenase, decarboxylating (LOC100283692), mRNA	sterol-4-alpha-carboxylate 3-dehydrogenase, decarboxylating	catalytic activity;3-beta-hydroxy-delta5-steroid dehydrogenase activity;endoplasmic reticulum;steroid biosynthetic process;metabolic process;oxidoreductase activity;cellular metabolic process;coenzyme binding;catalytic activity;3-beta-hydroxy-delta5-steroid dehydrogenase activity;endoplasmic reticulum;steroid biosynthetic process;metabolic process;oxidoreductase activity;cellular metabolic proces…	DH_sc/Rdtase_SDR; Epimerase_deHydtase; 3Beta_OHSteriod_DH/Estase; Male_sterile_NAD-bd	Eukaryota
2	GRMZM2G156800			4.9137	7.3813	15.4453	15.1886	15.9228	5.2653	4.0984	9.2335	no	yes	no	NA	NA	protein kinase activity;protein serine/threonine kinase activity;ATP binding;protein amino acid phosphorylation;protein kinase activity;protein serine/threonine kinase activity;ATP binding;protein amino acid phosphorylation	Se/Thr_prot_kinase-like_dom; Ser-Thr/Tyr-Pkinase; Kinase-like_dom; Tyr_Pkinase_cat_dom; Ser/Thr_prot_kinase_dom; Protein_kinase_ATP_BS; Ser/Thr_prot_kinase_AS	Eukaryota
2	AF466202.2_FG008			4.9452	6.1801	7.2264	8.7403	9.2025	1.8103	1.2058	3.1554	no	no	no	NA	NA	NA	Chromatin_SPT2	Magnoliophyta
2	AC149475.2_FG005			4.3231	5.4951	11.8775	12.974	14.0562	2.4461	1.314	3.6547	no	yes	no	hypothetical protein LOC100381553 (LOC100381553), mRNA	hypothetical protein LOC100381553	intracellular;zinc ion binding	TF_JmjN; TF_JmjC; Znf_C2H2; TF_JmjC_AAH; Znf_C2H2-like	Eukaryota
2	GRMZM2G057176			3.1158	1.8959	3.0752	3.1114	3.3417	0.9516	0.4661	1.6208	no	no	no	NA	NA	NA	Pentatricopeptide_repeat; WD40_repeat_CS	Magnoliophyta
2	GRMZM2G156818			5.6585	4.404	13.4195	12.7345	13.6955	3.1374	1.5074	3.8509	no	no	no	NA	NA	binding	RNA_pol_II_AP1_N; Meiotic_Spo11	Embryophyta
2	GRMZM2G153144			3.1926	3.8685	5.7684	4.355	6.7205	3.257	2.7268	2.6471	no	no	no	NA	NA	DNA binding;transcription factor activity;nucleus;transcription, DNA-dependent;regulation of transcription, DNA-dependent;sequence-specific DNA binding;regulation of transcription;protein dimerization activity	MFMR; bZIP_1; bZIP_2; TF_bZIP	Embryophyta
2	GRMZM2G099036			1.6409	1.1968	2.3026	3.0942	2.5304	1.1345	0.7883	1.7128	no	no	no	hypothetical protein LOC100191628 (LOC100191628), mRNA	hypothetical protein LOC100191628	DNA binding;DNA topoisomerase (ATP-hydrolyzing) activity;structural molecule activity;ATP binding;chromosome;DNA topological change;cell adhesion;actin cytoskeleton;homoiothermy;ice binding;response to freezing	DUF399; Wilms_tumour; Vinculin; Antifreeze_1; Topo_IIA_B	Eukaryota
2	GRMZM2G094090			2.6249	2.3449	5.3681	4.9055	6.3776	1.0766	0.5402	1.4564	no	no	no	NA	NA	NA	Pentatricopeptide_repeat	Tracheophyta
2	GRMZM2G173472			1.1668	3.1785	3.7499	3.9734	3.5842	2.2333	2.8462	2.2801	no	no	no	LOC100283985 (cl11234_1), mRNA	LOC100283985	glycerol-3-phosphate dehydrogenase (NAD+) activity;glycerol-3-phosphate metabolic process;lipid metabolic process;glycerol-3-phosphate dehydrogenase complex;hydrolase activity, acting on ester bonds;oxidation reduction	Lipase_GDSL; Esterase_SGNH_hydro-type; NAD-dep_Gly3P_DH	Eukaryota
2	GRMZM2G033521			2.7104	3.9138	5.3777	6.2503	8.1967	2.1501	1.1412	2.423	no	yes	no	NA	NA	ubiquitin ligase complex;ubiquitin-protein ligase activity;binding;protein ubiquitination	Ubox_domain; Armadillo; ARM-type_fold	Embryophyta
2	GRMZM2G396231			4.9323	3.8557	6.5149	7.2624	7.8825	1.6229	1.2342	2.2113	no	no	no	NA	NA	chromatin;DNA binding;nucleus;regulation of transcription, DNA-dependent;chromatin;DNA binding;nucleus;regulation of transcription, DNA-dependent	AT_hook_DNA-bd_motif; HMGI/Y_DNA-bd_CS; AT_hook-like; HMGI/HMGY	Embryophyta
2	GRMZM2G061876			1.2868	0.8863	2.2291	2.5745	2.922	0.7245	0.5695	1.1767	no	no	no	NA	NA	GTPase activity;GTP binding;intracellular;GTPase activity;GTP binding;intracellular	ProtSyn_GTP-bd; Transl_elong_EFTu/EF1A_2; Transl_elong_EFG/EF2_C; Elongation_fac_G/III/V; Small_GTP-bd; TypA_GTP-bd	Eukaryota
2	GRMZM2G039532			1.0904	2.3111	2.286	2.1383	3.1326	1.8805	0.8973	1.3545	no	no	yes	NA	NA	NA	NA	Embryophyta
2	GRMZM2G022547			6.2159	9.2333	17.7557	16.4097	20.7458	6.8018	4.2526	10.3384	no	yes	yes	NA	NA	peroxidase activity;iron ion binding;calcium ion binding;electron carrier activity;membrane;integral to membrane;oxidoreductase activity;FAD binding;oxidoreductase activity, acting on NADH or NADPH, with oxygen as acceptor;oxidation reduction	NADPH_Ox; EF-hand; Flavoprotein_TM; FAD-bd_8; Fe_red_NAD-bd_6; Riboflavin_synthase-like_b-brl; EF_hand_Ca-bd; EF_Hand_1_Ca_BS; Cyt_b245_heavy_chain	Eukaryota
2	GRMZM2G329867			2.1256	2.529	6.0299	6.0157	8.1301	1.7428	0.1712	0.7235	no	no	no	NA	NA	NA	NA	Eukaryota
2	GRMZM2G057935	phyC1	phytochromeC1	12.169	16.9457	23.0566	26.4614	30.3	11.9666	6.6172	14.1277	no	no	no	NA	NA	two-component sensor activity;signal transducer activity;receptor activity;ATP binding;regulation of transcription, DNA-dependent;signal transduction;sensory perception;G-protein coupled photoreceptor activity;red, far-red light phototransduction;photoreceptor activity;membrane;protein-tetrapyrrole linkage;protein-chromophore linkage;protein homodimerization activity;regulation of transcription	PAS_2; GAF; Phytochrome_cen-reg; PAS_fold; PAS_4; Sig_transdc_His_kin_sub1_dim/P; ATPase-like_ATP-bd; PAS; Phytochrome_A-E; Phytochrome	Embryophyta
2	GRMZM2G389948			3.8522	4.6927	7.7294	6.6674	7.7374	2.4581	1.1984	2.2502	no	no	no	NA	NA	protein kinase activity;protein serine/threonine kinase activity;protein binding;ATP binding;protein amino acid phosphorylation	LRR-contain_N2; Leu-rich_rpt; Se/Thr_prot_kinase-like_dom; Ser-Thr/Tyr-Pkinase; Kinase-like_dom; Leu-rich_rpt_typical-subtyp; Tyr_Pkinase_cat_dom; Ser/Thr_prot_kinase_dom; Protein_kinase_ATP_BS; Ser/Thr_prot_kinase_AS	Poaceae
2	GRMZM2G418749			0.9029	1.2233	1.7681	1.968	2.1118	1.0216	0.3904	0.7201	no	no	no	NA	NA	NA	Pentatricopeptide_repeat	Embryophyta
2	GRMZM2G037094			40.4042	56.0534	55.0313	56.7993	58.4284	39.9608	47.1292	23.4514	no	no	yes	NA	NA	NA	NA	NA
2	GRMZM2G140156			4.5204	7.4645	18.9589	14.3953	16.6671	3.3676	2.0832	4.5829	no	yes	no	NA	LOC100279908	DNA binding;protein binding;intracellular;zinc ion binding	ARID/BRIGHT_DNA-bd; Znf_PHD	Viridiplantae
2	GRMZM2G313649			17.9445	12.6359	23.2353	16.6769	28.6459	11.2978	12.1022	13.7944	no	no	no	hypothetical protein LOC100280033 (LOC100280033), mRNA	hypothetical protein LOC100280033	catalytic activity;protein serine/threonine kinase activity;protein tyrosine kinase activity;ATP binding;protein amino acid phosphorylation	RIO-like_kinase; Kinase-like_dom; Tyr_Pkinase_cat_dom; Ser/Thr_prot_kinase_dom; Tyr_prot_kinase_AS	Eukaryota
2	GRMZM2G106357			0.837	0.419	1.135	1.1817	0.947	0.7897	0.3837	0.3351	no	no	yes	NA	NA	NA	UPF0047	NA
2	GRMZM2G126120			17.2258	16.2729	39.63	37.0504	47.849	11.6603	6.9957	15.2207	no	yes	yes	NA	NA	RNA binding;RNA binding;RNA binding	KH_type_1_subgr; KH	Embryophyta
2	GRMZM2G414866			3.8403	4.2773	16.5597	16.4194	17.93	4.7815	1.9003	4.7323	no	yes	no	NA	NA	NA	NA	Magnoliophyta
2	GRMZM2G087944			0.0771	0.194	0.2614	0.3186	0.3068	0.0711	0.1791	0.0865	no	no	no	NA	NA	DNA binding;transcription factor activity;binding;regulation of transcription, DNA-dependent	NA	Eukaryota
2	GRMZM5G833066			1.0354	0.6223	4.5343	3.9749	5.5578	3.161	2.4314	1.5429	no	yes	yes	NA	NA	NA	NA	NA
2	GRMZM2G156756			18.8262	25.3182	36.5809	33.8528	41.452	11.6773	8.1202	17.3371	no	no	no	hypothetical protein LOC100272505 (LOC100272505), mRNA	hypothetical protein LOC100272505	DNA binding;nucleus	Transcpt_factor_SBP-box; Ankyrin_rpt-contain_dom; Ankyrin_rpt	Viridiplantae
2	GRMZM2G108057			5.3412	5.6125	11.8884	14.2452	14.0177	6.2517	3.2169	7.985	no	no	no	NA	NA	ATP binding;ATP biosynthetic process;ATPase activity, coupled to transmembrane movement of ions, phosphorylative mechanism;membrane;hydrolase activity, acting on acid anhydrides, catalyzing transmembrane movement of substances	NA	Eukaryota
2	GRMZM2G475583			3.9869	2.7409	7.9305	6.8005	8.3015	1.3645	1.1049	1.9016	no	no	no	NA	NA	protein binding;zinc ion binding;intracellular signaling pathway;protein binding;zinc ion binding;intracellular signaling pathway;protein binding;zinc ion binding;intracellular signaling pathway	Znf_FYVE_PHD; Prot_Kinase_C-like_PE/DAG-bd; Znf_PHD; Zinc_finger_PHD-type_CS	Eukaryota
2	GRMZM2G471083			1.0296	1.2833	4.5639	3.9045	5.1485	0.6619	0.3501	1.2301	no	yes	yes	hypothetical protein LOC100384650 (LOC100384650), mRNA	hypothetical protein LOC100384650	sucrose metabolic process;biosynthetic process;sucrose-phosphate synthase activity	Glyco_trans_1; Sucrose-P_synthase; SucrsPsyn_pln	Viridiplantae
2	GRMZM5G800764			0.5868	1.3448	1.5119	1.4748	1.4131	0.397	0.2615	0.5556	no	no	no	NA	NA	NA	NA	NA
2	GRMZM2G003033			1.382	2.2638	4.6345	4.1409	4.6407	1.3487	0.6701	1.3946	no	no	no	hypothetical protein LOC100381606 (LOC100381606), mRNA	hypothetical protein LOC100381606	binding;calcium ion binding;mitochondrial inner membrane;transport;membrane;transmembrane transport	EF-hand; Mitochondrial_sb/sol_carrier; Mitochondria_substrate_carrier; EF_hand_Ca-bd; EF_Hand_1_Ca_BS; Mit_carrier	Eukaryota
2	GRMZM5G899800			17.5222	23.0121	35.5141	41.3844	51.7348	30.8653	7.9392	21.9628	no	no	no	hypothetical protein LOC100272324 (LOC100272324), mRNA	hypothetical protein LOC100272324	ATP binding;chromosome	RecF/RecN/SMC_N	Eukaryota
2	GRMZM2G154229			5.5197	5.2242	9.0931	11.9985	12.7081	2.1218	1.8174	4.2571	no	no	no	NA	NA	nucleic acid binding;nucleic acid binding	RRM_RNP1; Rrm_2	Viridiplantae
2	GRMZM2G017845			2.2885	3.0317	5.5663	5.5053	5.807	1.903	0.8441	1.9253	no	yes	yes	hypothetical protein LOC100191921 (LOC100191921), mRNA	hypothetical protein LOC100191921;hypothetical protein LOC100191921;hypothetical protein LOC100191921;hypothetical protein LOC100191921	zinc ion binding;zinc ion binding;zinc ion binding;zinc ion binding	Znf_LIM; Ubiquitin-int_motif	Viridiplantae
2	GRMZM2G528283			0.2919	0.953	1.6386	2.1116	1.3966	0.9433	0.8098	0.6235	no	no	yes	NA	NA	NA	NA	NA
2	GRMZM5G883149			4.1621	8.3789	16.8395	17.5203	14.1198	8.0362	8.4632	6.4163	no	yes	yes	hypothetical protein LOC100274110 (LOC100274110), mRNA	hypothetical protein LOC100274110;hypothetical protein LOC100274110	transport;transport;transport;transport	AP_mu_sigma_su; Longin-like	Eukaryota
2	GRMZM2G353301			1.5711	2.2108	3.4793	3.0641	3.5679	1.1041	0.4676	1.1305	no	yes	no	NA	NA	NA	Pentatricopeptide_repeat	Magnoliophyta
2	GRMZM2G005869			24.238	20.3958	27.19	28.6205	35.5164	11.2563	8.5867	12.1123	no	no	no	hypothetical protein LOC100273759 (LOC100273759), mRNA;hypothetical protein LOC100273759 (LOC100273759), mRNA;LOC100281573 (IDP300), mRNA;hypothetical protein LOC100273759 (LOC100273759), mRNA	hypothetical protein LOC100273759;LOC100281573;hypothetical protein LOC100273759;LOC100281573;hypothetical protein LOC100273759;LOC100281573	protein kinase activity;protein serine/threonine kinase activity;ATP binding;protein amino acid phosphorylation;protein kinase activity;protein serine/threonine kinase activity;ATP binding;protein amino acid phosphorylation;protein kinase activity;protein serine/threonine kinase activity;ATP binding;protein amino acid phosphorylation	Se/Thr_prot_kinase-like_dom; Ser-Thr/Tyr-Pkinase; Pkinase_C; Kinase-like_dom; Tyr_Pkinase_cat_dom; Ser/Thr_prot_kinase_dom; AGC-kinase_C; Protein_kinase_ATP_BS; Ser/Thr_prot_kinase_AS	Eukaryota
2	GRMZM2G084525			4.9426	4.626	12.7877	15.7006	16.6334	3.4362	1.6886	4.1821	no	no	no	NA	NA	catalytic activity;metalloendopeptidase activity;proteolysis;zinc ion binding;metal ion binding;catalytic activity;metalloendopeptidase activity;proteolysis;zinc ion binding;metal ion binding	Peptidase_M16_C; Metalloenz_metal-bd	Eukaryota
2	GRMZM5G894564			2.3057	2.1229	4.9981	4.8718	5.225	0.8214	0.7177	1.0362	no	no	no	NA	NA	NA	NA	NA
2	GRMZM2G030858			5.0974	6.6103	10.9881	8.6676	14.3518	2.9227	3.6483	2.0204	yes	yes	yes	NA	NA	NA	WD40_repeat-like_dom; WD40_repeat	Embryophyta
2	GRMZM2G372200			5.2395	5.3036	8.6553	7.8512	10.6097	2.1357	1.6364	2.1082	no	no	no	LOC100192867 (umc1263), mRNA	LOC100192867	intracellular	BRCT	Eukaryota
2	GRMZM2G099481			1.5044	1.7224	4.689	5.795	7.0975	1.746	0.8606	2.31	no	yes	yes	hypothetical protein LOC100279857 (LOC100279857), mRNA	hypothetical protein LOC100279857	NA	Lipin_N; LNS2	Eukaryota
2	GRMZM2G385338			2.6336	3.4665	6.5446	8.7526	10.9813	1.0826	0.7273	1.5185	no	no	no	NA	NA	DNA binding;protein binding;nucleus;zinc ion binding;phosphopantetheine binding	FYrich_N; FYrich_C; Znf_PHD-finger; Znf_FYVE_PHD; Bromodomain; Znf_PHD; Znf_RING; PPantetheine_attach_site; Zinc_finger_PHD-type_CS	Eukaryota
2	GRMZM2G405178			8.893	10.3468	11.0492	11.8664	17.5195	3.9782	2.7845	10.5604	no	no	no	S-adenosylmethionine-dependent methyltransferase/ methyltransferase/ thiopurine S-methyltransferase (LOC100281381), mRNA;hypothetical protein LOC100381787 (LOC100381787), mRNA;hypothetical protein LOC100381787 (LOC100381787), mRNA	S-adenosylmethionine-dependent methyltransferase/ methyltransferase/ thiopurine S-methyltransferase	cytoplasm;thiopurine S-methyltransferase activity;metabolic process;methyltransferase activity	NA	Poaceae
2	GRMZM2G163141			3.6414	4.912	8.4723	8.104	9.8813	2.1165	1.2453	2.5031	no	no	no	NA	NA	alanine metabolic process;alanine racemase activity;alanine metabolic process;alanine racemase activity;protein kinase activity;protein serine/threonine kinase activity;ATP binding;protein amino acid phosphorylation	NA	Eukaryota
2	GRMZM2G033876			6.7649	8.3931	12.318	15.164	19.2306	3.5606	2.2476	4.687	no	yes	no	NA	NA	NA	NA	Embryophyta
2	GRMZM2G395736			2.651	2.0925	5.0784	6.1655	5.7097	0.8251	0.587	0.8982	no	no	no	NA	NA	intracellular	BRCT	Eukaryota
2	GRMZM2G458266			2.9719	3.4635	9.5436	9.9501	10.9989	1.9202	1.2702	3.0031	no	yes	no	hypothetical protein LOC100279901 (LOC100279901), mRNA	hypothetical protein LOC100279901;hypothetical protein LOC100279901	NA	WD40_repeat_sg; WD40_repeat-like_dom; WD40_repeat; Ig/MHC_CS	Embryophyta
2	GRMZM2G403493			0.1696	0.3808	0.9731	1.6794	1.1171	0.3134	0.1375	0.5439	no	no	no	NA	NA	structural constituent of ribosome;protein serine/threonine kinase activity;ATP binding;intracellular;ribosome;translation;protein amino acid phosphorylation	Ribosomal_L21e; Reg_chr_condens; Reg_csome_cond/b-lactamase_inh; Kinase-like_dom; Translation_prot_SH3-like; Ser/Thr_prot_kinase_dom	Eukaryota
2	GRMZM2G034690			12.5231	10.2455	14.2689	15.5328	17.9068	6.1002	3.5585	11.452	no	no	no	hypothetical protein LOC100383242 (LOC100383242), mRNA	hypothetical protein LOC100383242	NA	PyrdxlP-dep_Trfase_major_dom	Embryophyta
2	GRMZM2G420789			10.7113	10.2979	33.8831	37.1013	41.3724	13.4778	6.446	15.0685	no	no	no	NA	NA	hormone activity;structural molecule activity;structural constituent of cell wall;extracellular region;cell adhesion;actin cytoskeleton	Inhibin_betaB; Pistil_extensin; Vinculin	Eukaryota
2	GRMZM2G326472			18.1676	25.5541	44.8603	37.8386	44.4222	12.6533	7.7455	18.2766	no	no	no	hypothetical protein LOC100304418 (LOC100304418), mRNA	hypothetical protein LOC100304418	protein kinase activity;protein serine/threonine kinase activity;ATP binding;protein amino acid phosphorylation;protein kinase activity;ATP binding;protein amino acid phosphorylation;protein kinase activity;protein serine/threonine kinase activity;ATP binding;protein amino acid phosphorylation	OPR_PB1; Se/Thr_prot_kinase-like_dom; Ser-Thr/Tyr-Pkinase; Kinase-like_dom; Tyr_Pkinase_cat_dom; Ser/Thr_prot_kinase_dom; Protein_kinase_ATP_BS; Ser/Thr_prot_kinase_AS	Eukaryota
2	GRMZM2G004593			0.7864	0.2442	2.2703	2.0181	2.1765	0.457	0.2458	0.2815	no	no	no	NA	NA	catalytic activity;glycolysis;metabolic process;intramolecular transferase activity, phosphotransferases	His_Pase_superF_clade-1; PG/BPGM_mutase_AS; Phosphogly_mut1	Eukaryota
2	GRMZM2G035999			2.5761	1.7839	4.8244	3.8938	4.9722	1.2725	0.8369	1.1601	no	no	no	light-mediated development protein DET1 (LOC100281541), mRNA	light-mediated development protein DET1;light-mediated development protein DET1	catalytic activity;catalytic activity;catalytic activity	De-etiolated_protein_1_Det1; 6-hairpin_glycosidase-like	Eukaryota
2	GRMZM2G328612			0.6282	0.795	1.9403	2.511	2.8412	0.3052	0.2482	0.5673	no	yes	no	NA	NA	binding	ARM-type_fold	Tracheophyta
2	GRMZM2G128737			8.6946	10.9506	13.3739	13.2947	17.9149	7.477	6.3316	13.0973	no	no	no	hypothetical protein LOC100381608 (LOC100381608), mRNA	hypothetical protein LOC100381608	NA	NA	Magnoliophyta
2	GRMZM2G126956			6.458	8.3565	9.6475	11.1305	11.0499	7.4559	3.7259	4.9077	no	yes	yes	NA	NA	nucleic acid binding;zinc ion binding	WD40_repeat_sg; WD40_repeat-like_dom; Znf_CCHC; WD40_repeat; WD40_repeat_CS; G-protein_beta_WD-40_rep_reg	Eukaryota
2	GRMZM2G118363			10.3637	11.2942	13.7655	12.9665	17.1217	4.7099	2.8794	4.5961	no	no	no	NA	NA	intracellular;intracellular protein transport	VHS; GAT; ENTH_VHS; VHS_subgroup	Eukaryota
2	GRMZM2G001114			23.8685	39.07	52.5675	42.2873	56.7641	37.6881	26.4272	40.7072	no	no	no	LOC100191467 (umc1433), mRNA	LOC100191467	protein binding;zinc ion binding;protein binding;zinc ion binding	Znf_C3HC4_RING-type; Znf_PHD; Znf_RING	Tracheophyta
2	GRMZM2G130167			1.8295	1.248	2.1441	1.8073	2.2113	0.7973	0.6519	0.844	no	no	no	NA	NA	nucleic acid binding;protein binding;zinc ion binding	RWD; UBQ-conjugat/RWD-like	Eukaryota
2	GRMZM2G133943			1.822	1.3427	2.6763	2.2544	2.2325	1.3811	0.5033	1.6362	no	no	no	NA	NA	catalytic activity;metabolic process	C2_Ca-dep; PLipase_D/transphosphatidylase; C2_Ca/lipid-bd_dom_CaLB	Eukaryota
2	GRMZM2G150656			10.4661	22.2061	29.2964	28.0375	28.8281	21.5553	22.4619	18.1761	no	no	yes	peroxisomal multifunctional enzyme type 2 (LOC100284127), mRNA	peroxisomal multifunctional enzyme type 2	sterol binding	SCP2_sterol-bd_dom	Zea mays
2	GRMZM2G306062			1.0166	1.8164	3.3223	2.6782	3.5221	1.1248	0.4407	1.9664	no	no	no	NA	NA	inositol or phosphatidylinositol phosphatase activity	Endo/exonuclease/phosphatase; IPPc	Magnoliophyta
2	GRMZM2G025598			45.8044	45.807	100.327	106.749	126.382	22.6426	17.2902	31.0007	no	no	no	hypothetical protein LOC100381672 (LOC100381672), mRNA	hypothetical protein LOC100381672	NA	TPR-3; TPR-1; TPR_2; TPR_repeat	Eukaryota
2	GRMZM2G362949			0.5817	1.463	2.5631	2.0747	2.9035	0.8967	0.9692	1.2212	no	no	no	hypothetical protein LOC100273303 (LOC100273303), mRNA	hypothetical protein LOC100273303	NA	NA	Eukaryota
2	GRMZM2G352431			3.4565	2.8883	7.5578	10.3673	10.1678	1.8845	0.7431	2.1324	no	no	no	hypothetical protein LOC100194077 (LOC100194077), mRNA;hypothetical protein LOC100194077 (LOC100194077), mRNA	hypothetical protein LOC100194077;hypothetical protein LOC100194077	nucleus;histone-lysine N-methyltransferase activity;nucleus;zinc ion binding;histone-lysine N-methyltransferase activity	Znf_CW; SET_dom; AWS; Post-SET_dom	Eukaryota
2	AC208436.3_FG007			1.3774	1.6843	4.2926	5.1057	5.4688	1.0403	0.3452	0.7993	no	yes	no	NA	NA	RNA binding	Agenet; Acyl_CoA_acyltransferase; Tudor-like_plant	Eukaryota
2	GRMZM2G388371			2.5669	5.2264	4.4228	4.2469	5.0232	3.3254	2.7941	3.6017	no	yes	yes	hypothetical protein LOC100384389 (LOC100384389), mRNA	hypothetical protein LOC100384389	DNA binding;cytoplasm;DNA methylation;protein amino acid methylation;N-methyltransferase activity;protein methyltransferase activity	Ribosomal-L11_MeTrfase_PrmA; RM_Methylase	Eukaryota
2	GRMZM2G030263			1.9053	1.1799	3.1395	2.6246	2.7086	0.9084	0.4973	1.1569	no	no	no	NA	NA	NA	Pentatricopeptide_repeat	Tracheophyta
2	GRMZM2G467799			23.0382	18.9654	44.406	46.5575	56.6644	8.5325	4.8811	12.5398	no	no	no	hypothetical protein LOC100381566 (LOC100381566), mRNA;hypothetical protein LOC100383943 (LOC100383943), mRNA;hypothetical protein LOC100381566 (LOC100381566), mRNA;hypothetical protein LOC100383943 (LOC100383943), mRNA;hypothetical protein LOC100381566 (LOC100381566), mRNA	hypothetical protein LOC100383943;hypothetical protein LOC100383943	nucleic acid binding;helicase activity;ATP binding;metabolic process;oxidoreductase activity;oxidation reduction;nucleic acid binding;helicase activity;ATP binding;metabolic process;oxidoreductase activity;oxidation reduction;nucleic acid binding;helicase activity;ATP binding;metabolic process;oxidoreductase activity;oxidation reduction	DNA/RNA_helicase_C; AT_hook-like; Ald_DH_CS	Eukaryota
2	GRMZM2G072861			20.0162	9.9137	20.7105	23.0364	23.6928	8.0666	5.1983	15.0513	yes	no	no	NA	NA	catalytic activity;metalloendopeptidase activity;proteolysis;metal ion binding	Pept_M16_N; Metalloenz_metal-bd	Eukaryota
2	GRMZM2G128877			18.2918	20.6189	54.5862	63.1181	88.4995	19.9644	14.5441	22.7939	yes	yes	no	NA	NA	nucleotide binding;ATP binding;ATP synthesis coupled proton transport;proton transport;proton-transporting two-sector ATPase complex;hydrolase activity, acting on acid anhydrides, catalyzing transmembrane movement of substances;nucleoside-triphosphatase activity;proton-transporting two-sector ATPase complex, catalytic domain;proton-transporting V-type ATPase, V1 domain;ATP metabolic process;hydro…	NA	Eukaryota
2	GRMZM2G044044			5.0599	7.1463	17.6684	17.7044	19.5784	4.3895	2.9683	6.4253	no	yes	yes	hypothetical protein LOC100272356 (LOC100272356), mRNA	hypothetical protein LOC100272356	NA	Bromodomain; Bromodomain_CS	Eukaryota
2	GRMZM2G059937			1.2586	3.7663	3.8956	4.8662	4.8302	2.6882	1.9054	1.7556	yes	yes	yes	outer mitochondrial membrane protein porin (LOC100282722), nuclear gene encoding mitochondrial protein, mRNA	outer mitochondrial membrane protein porin	mitochondrial outer membrane;anion transport;voltage-gated anion channel activity;transmembrane transport	Porin_Euk	Eukaryota
2	GRMZM2G086389			6.7705	6.3221	13.8493	11.0994	13.7947	4.9489	2.7095	6.1806	no	no	no	hypothetical protein LOC100191398 (LOC100191398), mRNA	hypothetical protein LOC100191398	potassium ion transport;protein transport;potassium ion transmembrane transporter activity;P-P-bond-hydrolysis-driven protein transmembrane transporter activity;membrane;potassium ion transport;potassium ion transmembrane transporter activity;membrane	K+_transporter; K+_uptake_protein_kup	Eukaryota
2	GRMZM5G873286			2.7305	1.8253	8.491	7.6568	8.302	1.7988	1.0271	2.4994	no	no	no	NA	NA	NA	NA	Poaceae
2	GRMZM2G480262			0	0.0415	0.2931	0.2772	0.2538	0	0.0247	0.0201	no	yes	yes	NA	NA	NA	NA	Poaceae
2	GRMZM2G142620			18.7105	16.3764	20.7594	25.2796	27.2728	7.2131	6.1986	16.068	no	no	no	hypothetical protein LOC100191718 (LOC100191718), mRNA	hypothetical protein LOC100191718	endoplasmic reticulum;endoplasmic reticulum	ER_p29_C; Tropomyosin	Embryophyta
2	GRMZM5G857810			2.0073	2.4836	6.249	7.077	9.1084	4.6624	2.8978	3.6264	no	no	no	NA	NA	NA	NA	NA
2	GRMZM2G354696			4.5361	1.5522	11.644	13.2073	17.7321	1.09	0.3943	1.2994	no	no	no	NA	NA	NA	NA	Eukaryota
2	GRMZM2G138303			1.9681	1.7473	3.9652	2.8708	3.8295	0.9657	0.4825	1.0821	no	no	no	NA	NA	homoiothermy;ice binding;response to freezing	Pentatricopeptide_repeat; Antifreeze_1	Tracheophyta
2	GRMZM2G031656			6.6932	8.3342	18.6435	19.6431	21.632	6.3767	4.5682	9.9673	no	yes	no	NA	NA	nucleus;transcription regulator activity;regulation of transcription	NA	Tracheophyta
2	GRMZM2G109405			1.4201	3.7045	5.103	4.3469	4.8988	2.388	3.0011	4.0533	no	yes	yes	LOC100284811 (pco091663a), mRNA	LOC100284811;LOC100284811	sugar:hydrogen symporter activity;phosphoenolpyruvate-dependent sugar phosphotransferase system;hydrolase activity;sugar:hydrogen symporter activity;phosphoenolpyruvate-dependent sugar phosphotransferase system;hydrolase activity;sugar:hydrogen symporter activity;phosphoenolpyruvate-dependent sugar phosphotransferase system;hydrolase activity	Pesterase_At2g46; Metallo-dependent_phosphatase; PTS_HPr_Ser_P_site	Eukaryota
2	GRMZM2G138421			3.8634	5.1436	6.9099	7.1212	9.3023	3.01	1.4596	3.004	no	yes	no	hypothetical protein LOC100191441 (LOC100191441), mRNA	hypothetical protein LOC100191441	DNA binding;nucleus	Transcpt_factor_SBP-box; Ankyrin_rpt-contain_dom; Ankyrin_rpt	Viridiplantae
2	GRMZM2G358491			1.4903	1.555	2.4472	3.2267	3.0845	0.7317	0.6118	1.1585	no	no	no	NA	NA	NA	CTLH_C	Embryophyta
2	GRMZM2G159105			6.5641	9.0413	15.6816	11.8834	17.5289	5.6165	4.308	5.0525	no	yes	no	NA	NA	protein kinase activity;protein serine/threonine kinase activity;ATP binding;protein amino acid phosphorylation	Se/Thr_prot_kinase-like_dom; Ser-Thr/Tyr-Pkinase; Kinase-like_dom; Tyr_Pkinase_cat_dom; Ser/Thr_prot_kinase_dom; Protein_kinase_ATP_BS; Ser/Thr_prot_kinase_AS	Embryophyta
2	GRMZM2G363728			1.8135	2.2289	3.5675	4.1299	4.3444	0.8847	0.6377	1.1601	no	no	no	NA	NA	binding	ARM-type_fold	Eukaryota
2	GRMZM5G894698			1.5461	2.2554	3.171	4.4771	4.5617	1.8012	0.4064	1.102	no	no	no	NA	NA	NA	NA	Embryophyta
2	GRMZM2G051792			9.268	11.8739	15.9976	18.2785	21.4383	5.4692	3.5349	8.4717	no	no	no	NA	NA	zinc ion binding	Znf_C3HC4_RING-type; Znf_RING-CH	Eukaryota
2	GRMZM5G892645			34.6465	44.6829	105.046	140.746	127.327	49.4563	43.8227	51.1859	yes	yes	yes	spliceosome RNA helicase BAT1 (LOC100283032), mRNA;LOC100273717 (gpm624), mRNA	LOC100273717;spliceosome RNA helicase BAT1;LOC100273717;spliceosome RNA helicase BAT1;LOC100273717;spliceosome RNA helicase BAT1	nucleic acid binding;helicase activity;ATP binding;ATP-dependent helicase activity;nucleic acid binding;helicase activity;ATP binding;ATP-dependent helicase activity;nucleic acid binding;helicase activity;ATP binding;ATP-dependent helicase activity;nucleic acid binding;helicase activity;ATP binding;ATP-dependent helicase activity	DNA/RNA_helicase_DEAD/DEAH_N; DNA/RNA_helicase_C; DEAD-like_N	Eukaryota
2	GRMZM2G013794			7.3513	7.6625	23.303	22.9414	22.1695	4.3911	2.5032	6.3627	yes	yes	yes	NA	NA	nucleic acid binding;DNA binding;protein binding;nucleus;zinc ion binding;intracellular signaling pathway;nucleic acid binding;DNA binding;protein binding;nucleus;zinc ion binding;intracellular signaling pathway;nucleic acid binding;DNA binding;protein binding;nucleus;zinc ion binding;intracellular signaling pathway;nucleic acid binding;DNA binding;protein binding;nucleus;zinc ion binding;intrace…	PWWP; FYrich_N; FYrich_C; Znf_PHD-finger; SET_dom; Znf_FYVE_PHD; Tudor; FYrich_N_sg; FYrich_C_sg; Prot_Kinase_C-like_PE/DAG-bd; Znf_PHD; Zinc_finger_PHD-type_CS	Eukaryota
2	GRMZM2G100288			39.8522	68.502	86.1093	88.9288	107.869	43.774	28.0272	57.6217	no	no	no	hypothetical protein LOC100274007 (LOC100274007), mRNA	hypothetical protein LOC100274007	protein kinase activity;protein serine/threonine kinase activity;ATP binding;protein amino acid phosphorylation	Se/Thr_prot_kinase-like_dom; Ser-Thr/Tyr-Pkinase; Kinase-like_dom; Tyr_Pkinase_cat_dom; Ser/Thr_prot_kinase_dom; Protein_kinase_ATP_BS; Ser/Thr_prot_kinase_AS	Embryophyta
2	GRMZM2G147811			10.1176	9.3347	18.4357	15.4181	15.6468	4.0805	2.5282	5.7805	no	no	no	NA	NA	protein kinase activity;protein serine/threonine kinase activity;ATP binding;protein amino acid phosphorylation;protein kinase activity;protein serine/threonine kinase activity;ATP binding;protein amino acid phosphorylation;protein kinase activity;protein serine/threonine kinase activity;ATP binding;protein amino acid phosphorylation	Kinase-like_dom	Eukaryota
2	GRMZM2G032597			0.3896	0.9212	3.1519	2.9382	3.1333	1.7963	1.7547	2.0384	no	no	no	NA	NA	NA	NA	NA
2	GRMZM2G456568			27.7797	28.9423	34.5497	46.5763	50.3481	10.1887	8.2743	16.3332	no	no	no	NA	NA	DNA binding;regulation of transcription;DNA binding;regulation of transcription	NAM	Embryophyta
2	GRMZM2G173763			4.0496	3.8269	5.8337	6.7909	7.4157	3.0887	1.341	3.8053	no	no	no	NA	NA	NA	NA	Eukaryota
2	GRMZM2G477491			3.7201	3.9919	6.1966	7.4022	9.0501	2.1353	1.1431	4.2227	no	no	no	NA	NA	protein kinase activity;ATP binding;protein amino acid phosphorylation;protein kinase activity;ATP binding;protein amino acid phosphorylation	Kinase-like_dom; Protein_kinase_ATP_BS	commelinids
2	GRMZM2G164563			4.1206	3.2168	7.3708	5.2869	7.8373	0.9974	0.62	1.3711	no	no	no	NA	NA	NA	Pentatricopeptide_repeat	Tracheophyta
2	GRMZM2G013915			0.0506	0.1213	0.4708	0.453	1.0505	0.0295	0.0221	0.0605	no	no	no	NA	NA	nucleic acid binding;DNA binding;zinc ion binding	Znf_BED_prd; Znf_CCHC	Zea mays
2	GRMZM2G404922			0.3088	0.4442	0.8931	1.0175	1.3988	0.1179	0.1533	0.2878	no	no	no	NA	NA	nucleus;transcription regulator activity;regulation of transcription	HLH_DNA-bd; HLH_DNA-bd_dom	Tracheophyta
2	GRMZM2G370852			10.2065	10.9844	23.7711	29.6425	25.882	20.6768	13.5299	18.3695	no	yes	yes	3-isopropylmalate dehydratase large subunit 2 (LOC100284902), mRNA	3-isopropylmalate dehydratase large subunit 2;3-isopropylmalate dehydratase large subunit 2	metabolic process;cellular amino acid biosynthetic process;hydro-lyase activity;4 iron, 4 sulfur cluster binding;metabolic process;cellular amino acid biosynthetic process;hydro-lyase activity;4 iron, 4 sulfur cluster binding;metabolic process;cellular amino acid biosynthetic process;hydro-lyase activity;4 iron, 4 sulfur cluster binding	Acoase/IPM_deHydtase_lsu_aba; Homoacnase/IPMdehydase_lsu_sub	Eukaryota
2	GRMZM2G169688			17.2082	20.3671	39.1946	34.3414	40.1684	12.7357	8.2261	16.9559	no	no	no	NA	NA	NA	Bromodomain	Eukaryota
2	GRMZM2G083475			10.3678	12.037	30.3312	41.55	44.9628	7.2606	4.0422	9.4616	no	yes	no	hypothetical protein LOC100193748 (LOC100193748), mRNA	hypothetical protein LOC100193748;hypothetical protein LOC100193748	microtubule motor activity;ATP binding;microtubule-based movement;microtubule motor activity;ATP binding;microtubule-based movement	Kinesin_motor_dom; Kinesin_motor_CS	Eukaryota
2	AC190915.3_FG007			4.788	1.9255	4.8416	6.8943	6.2913	3.4987	0.4059	1.8502	no	no	no	NA	NA	NA	NA	Embryophyta
2	GRMZM2G021422			15.6336	13.3672	18.4193	18.4041	21.4838	6.4763	7.5858	11.0763	no	no	no	NA	NA	NA	NA	Eukaryota
2	GRMZM2G305159			0.9914	1.2226	1.4192	1.1401	2.494	1.4974	0.5623	0.6347	no	no	no	NA	NA	catalytic activity;calcium-transporting ATPase activity;ATP binding;ATP biosynthetic process;cation transport;calcium ion transport;metabolic process;calcium ion transmembrane transporter activity;ATPase activity, coupled to transmembrane movement of ions, phosphorylative mechanism;membrane;hydrolase activity, acting on acid anhydrides, catalyzing transmembrane movement of substances;catalytic ac…	ATPase_P-typ_cation-transptr_N; ATPase_P-typ_ATPase-assoc-dom; Dehalogen-like_hydro; ATPase_P-typ_cation-transptr_C; ATPase_P-typ_ion-transptr; ATPase_P-typ_H-transp; ATPase_P-typ_cation-exchng_asu; ATPase_P-typ_P_site; ATPase_P-typ_Ca-transp_PMCA	Eukaryota
2	GRMZM2G014917			3.0927	3.9713	6.7232	7.0288	7.9038	1.9699	0.6649	2.3267	no	no	no	NA	NA	ubiquitin thiolesterase activity;ubiquitin-dependent protein catabolic process;zinc ion binding	Peptidase_C19; Znf_UBP; Pept_C19ubi-hydrolase_C_CS	Eukaryota
2	GRMZM2G001191			9.6144	13.1054	25.0177	24.3079	28.2268	7.6053	3.6543	8.505	no	yes	no	NA	NA	NA	PAP_assoc	Eukaryota
2	GRMZM2G170412			2.8066	4.3682	8.7985	8.9151	8.7762	2.9089	1.2193	3.3324	no	yes	no	NA	NA	protein binding;zinc ion binding	PWWP; Znf_PHD-finger; Znf_FYVE_PHD; Znf_PHD; Zinc_finger_PHD-type_CS	Eukaryota
2	GRMZM2G003755			2.578	2.6531	6.1063	4.9036	4.9506	1.5333	0.8337	2.1349	no	no	no	hypothetical protein LOC100381536 (LOC100381536), mRNA;hypothetical protein LOC100383650 (LOC100383650), mRNA	hypothetical protein LOC100381536;hypothetical protein LOC100383650	ATP binding;nucleus;regulation of transcription, DNA-dependent;apoptosis;defense response	NB-ARC; PAH; Disease_R	Poaceae
2	GRMZM2G375807			1.8311	1.5421	5.3274	5.3685	5.5324	0.7271	0.3177	1.1502	no	no	no	NA	NA	nucleotide binding;ATP binding;transport;membrane;integral to membrane;ATPase activity;nucleoside-triphosphatase activity;ATPase activity, coupled to transmembrane movement of substances;transmembrane transport	ABC_Ald_N; ABC_transporter-like; ABC_transptrTM_dom_typ1; ATPase_AAA+_core; ABC_transporter_CS	Eukaryota
2	GRMZM2G029029			4.4887	7.0528	8.959	5.2487	12.7112	4.0267	2.8889	2.2847	no	no	yes	LOC100273249 (IDP89), mRNA	LOC100273249	RNA binding	KH	Eukaryota
2	GRMZM2G480002			18.5719	21.0517	27.0539	25.2151	26.9686	8.9917	5.094	8.7676	no	no	no	NA	NA	NA	GYF	Embryophyta
2	GRMZM2G087753			0.8135	0.6181	2.0158	2.4772	3.1487	0.5261	0.1414	0.4223	no	yes	no	NA	NA	intracellular	BRCT	Magnoliophyta
2	GRMZM2G439049			2.0035	1.5932	4.0981	3.2336	4.7433	0.6858	0.2134	0.5828	no	no	no	NA	NA	NA	NA	Eukaryota
2	GRMZM2G092120			7.4859	9.0109	15.7499	17.9185	18.6573	6.5668	4.7713	10.4391	no	no	no	LOC100281537 (si605069e01), mRNA	LOC100281537;LOC100281537	hormone activity;extracellular region;hormone activity;extracellular region	DUF248_MeTrfase; Inhibin_betaB	Embryophyta
2	GRMZM2G406651			4.4024	5.0622	7.0073	8.9411	10.3711	2.8822	1.7393	3.9753	no	no	no	NA	NA	zinc ion binding;zinc ion binding	TF_FAR1-related; MULE_transposase_cons-dom; Znf_SWIM; Znf_PMZ	Magnoliophyta
2	GRMZM2G122740			0.8235	0.6784	1.6993	1.8967	1.8283	0.2904	0.3282	0.5527	no	no	no	hypothetical protein LOC100382001 (LOC100382001), mRNA	hypothetical protein LOC100382001	oxygen binding;heme binding	DUF630; DUF632; Leghaemoglobin_Fe_BS	Embryophyta
2	GRMZM2G171600			3.7909	3.4409	5.6364	4.9855	5.6768	1.9902	1.5252	4.5823	no	no	no	hypothetical protein LOC100384320 (LOC100384320), mRNA	hypothetical protein LOC100384320	calmodulin binding;nucleus;transcription regulator activity;regulation of transcription	CG-1; Ankyrin_rpt; IQ_motif_EF-hand-BS; Ankyrin_rpt-contain_dom; Ig_E-set	Eukaryota
2	GRMZM2G135839			1.8857	3.1742	7.9067	7.6081	8.9041	1.4055	1.3299	2.8441	no	yes	yes	NA	NA	hydrolase activity	Metallo-dependent_phosphatase	Viridiplantae
2	GRMZM2G058612			7.088	7.2817	10.0921	9.2457	10.7474	3.9934	3.4727	6.9525	no	yes	no	NA	NA	NA	F-box_dom_Skp2-like; Leu-rich_rpt_Cys-con_subtyp	Eukaryota
2	GRMZM2G121683			15.6608	18.8157	24.5535	23.5278	25.3871	18.0677	9.5593	19.6258	no	no	yes	hypothetical protein LOC100382048 (LOC100382048), mRNA	hypothetical protein LOC100382048	NA	NA	Embryophyta
2	GRMZM5G891159			8.6402	12.1705	22.7698	24.1086	33.7059	3.5489	3.3244	6.0815	no	yes	no	hypothetical protein LOC100382746 (LOC100382746), mRNA	hypothetical protein LOC100382746	nucleotide binding;ATP binding;transport;integral to membrane;ATPase activity;nucleoside-triphosphatase activity;ATPase activity, coupled to transmembrane movement of substances;transmembrane transport	ABC_transptr_TM_dom; ABC_transporter-like; ATPase_AAA+_core	Embryophyta
2	GRMZM2G151169			13.9525	21.1555	41.3143	38.894	41.4811	16.5586	7.476	12.3682	no	yes	no	hypothetical protein LOC100383412 (LOC100383412), mRNA	hypothetical protein LOC100383412	oxoglutarate dehydrogenase (succinyl-transferring) activity;glycolysis;metabolic process;oxidoreductase activity, acting on the aldehyde or oxo group of donors, disulfide as acceptor;thiamin pyrophosphate binding	DH_E1; Transketolase-like_Pyr-bd; 2oxoglutarate_DH_E1	Eukaryota
2	GRMZM2G312365			5.1063	5.8994	11.6383	13.1353	14.8428	3.3227	1.7	3.7066	no	no	no	NA	NA	NA	GYF	Embryophyta
2	GRMZM2G172152			4.8667	5.3533	10.8256	13.011	13.0343	3.9707	1.9687	6.1899	no	yes	no	hypothetical protein LOC100277533 (LOC100277533), mRNA	hypothetical protein LOC100277533	DNA photolyase activity;DNA repair;DNA photolyase activity;DNA repair;DNA photolyase activity;DNA repair;DNA photolyase activity;DNA repair	DNA_photolyase_N	Eukaryota
2	GRMZM2G039671			1.4618	1.5629	5.9864	5.874	7.3893	0.701	0.4745	1.1567	yes	yes	no	NA	NA	binding	DUF2428_death-receptor-like; ARM-type_fold	Eukaryota
2	GRMZM5G806347			6.3155	5.8337	12.9526	14.4748	15.558	3.6659	2.2727	4.9468	no	yes	no	NA	NA	NA	NA	Eukaryota
2	GRMZM2G082580			12.6791	16.3257	28.1073	27.0716	31.8625	23.5524	10.6765	22.8917	no	no	no	NA	NA	protein binding;zinc ion binding;membrane;cellulose synthase (UDP-forming) activity;cellulose biosynthetic process	Cellulose_synth; Znf_PHD; Znf_RING	Embryophyta
2	GRMZM2G059432			7.8911	8.0281	10.2896	10.5246	11.3111	6.3342	4.0306	8.0904	no	no	no	hypothetical protein LOC100192704 (LOC100192704), mRNA;hypothetical protein LOC100192704 (LOC100192704), mRNA	hypothetical protein LOC100192704;hypothetical protein LOC100192704	NA	NA	Eukaryota
2	GRMZM2G147534			5.9185	4.2786	9.027	6.8097	8.7655	1.6645	4.942	2.2613	yes	no	no	hypothetical protein LOC100273874 (LOC100273874), mRNA	hypothetical protein LOC100273874	NA	Methyltransferase-16_put	Eukaryota
2	GRMZM2G175782			7.5611	7.9709	14.2315	11.8511	16.3217	7.1697	5.7488	7.294	yes	no	no	NA	NA	DNA binding;aspartic-type endopeptidase activity;glucocorticoid receptor activity;steroid binding;nucleus;regulation of transcription, DNA-dependent;proteolysis;aspartic-type endopeptidase activity;proteolysis;DNA binding;glucocorticoid receptor activity;steroid binding;nucleus;regulation of transcription, DNA-dependent	DUF547; Glcrtcd_rcpt	Eukaryota
2	GRMZM2G174785			10.5725	10.7102	12.9202	18.9594	17.0079	4.5022	3.3498	7.1312	no	no	no	NA	NA	nucleic acid binding;RNA binding;RNA processing;nucleic acid binding;RNA binding;RNA processing	RRM_RNP1; Surp; ENTH_VHS; RNA-recognition_dom1; RNA_polymerase_II_lsu_CTD	Eukaryota
2	GRMZM2G354053			8.1934	10.5547	10.8091	12.3839	13.3833	5.2576	3.0257	9.0272	no	no	no	NA	NA	NA	Tropomyosin	Magnoliophyta
2	GRMZM2G121354			6.7181	6.1404	7.5905	7.0203	11.0856	3.2726	3.285	4.3142	no	no	no	NA	NA	nucleus;mRNA processing	DUF382; PSP	Eukaryota
2	GRMZM2G334409			2.9206	4.6731	11.361	10.3693	10.9798	2.3816	1.2397	2.6891	no	yes	yes	NA	NA	catalytic activity;hydrolase activity, hydrolyzing O-glycosyl compounds;alpha-mannosidase activity;carbohydrate metabolic process;mannose metabolic process;zinc ion binding;mannosidase activity;carbohydrate binding	Glyco_hydro_38_core; Glyco_hydro_38_cen_dom; Glyco_hydro_38_C; Glyco_hydro/deAcase_b/a-brl; Glyco_hydro-type_carb-bd	Eukaryota
2	GRMZM2G132468			20.9309	22.5713	30.3554	29.1125	33.7698	9.4036	7.9386	12.8874	no	no	no	NA	NA	protein tyrosine phosphatase activity;dephosphorylation;phosphatase activity	Tensin_phosphatase_C2-dom; C2_Ca/lipid-bd_dom_CaLB; Tyr_Pase_cat; Tyr_Pase_AS	Eukaryota
2	GRMZM2G393471			2.9604	2.94	9.0534	9.6822	10.9094	1.2708	0.9603	1.9251	no	yes	no	NA	NA	DNA binding;protein binding;nucleus;transcription initiation;zinc ion binding;histone modification	AT_hook_DNA-bd_motif; SWIB_MDM2_domain; Plus-3; GYF; Znf_FYVE_PHD; Znf_PHD; SWIB_domain; Plus3-dom_subgr; Zinc_finger_PHD-type_CS	Embryophyta
2	GRMZM2G402779			1.6813	1.3285	5.1036	4.7144	5.361	0.7492	0.3969	1.0161	no	no	no	NA	NA	NA	Pentatricopeptide_repeat	Magnoliophyta
2	GRMZM2G040876			10.5062	14.4673	31.3138	30.0879	34.6807	8.4421	6.0476	16.607	no	yes	no	hypothetical protein LOC100192699 (LOC100192699), mRNA	hypothetical protein LOC100192699	hydrolase activity, hydrolyzing O-glycosyl compounds;oligosaccharyl transferase activity;carbohydrate metabolic process;protein amino acid glycosylation;membrane	Oligo_trans_STT3; Glyco_hydro_1_AS	Eukaryota
2	GRMZM2G044557			5.2526	6.0952	9.9393	8.6463	9.0324	5.0257	3.6376	7.3873	no	no	no	hypothetical protein LOC100279294 (LOC100279294), mRNA	hypothetical protein LOC100279294	protein kinase activity;protein serine/threonine kinase activity;ATP binding;protein amino acid phosphorylation;protein kinase activity;protein serine/threonine kinase activity;ATP binding;protein amino acid phosphorylation	Se/Thr_prot_kinase-like_dom; Ser-Thr/Tyr-Pkinase; Kinase-like_dom; Tyr_Pkinase_cat_dom; Ser/Thr_prot_kinase_dom; Protein_kinase_ATP_BS; Ser/Thr_prot_kinase_AS	Eukaryota
2	GRMZM2G475504			15.1318	15.1632	22.5454	26.4586	31.7753	10.4582	5.1393	11.7772	no	no	no	NA	NA	NA	NA	Magnoliophyta
2	GRMZM2G036525			0.1757	0.4564	1.8356	1.3942	1.8634	0.7351	0.4493	0.6659	yes	no	no	NA	NA	NA	NA	Embryophyta
2	GRMZM2G171880			8.4234	7.4904	10.3652	11.4349	13.8848	5.5437	3.8254	8.8666	no	no	no	hypothetical protein LOC100279915 (LOC100279915), mRNA;hypothetical protein LOC100383449 (LOC100383449), mRNA	hypothetical protein LOC100279915;hypothetical protein LOC100383449	beta1-adrenergic receptor activity;structural molecule activity;transporter activity;transport;cell adhesion;G-protein coupled receptor protein signaling pathway;actin cytoskeleton;membrane;integral to membrane;transmembrane transport;transporter activity;transport;membrane;transmembrane transport	Xant/urac/vitC	Eukaryota
2	GRMZM2G047028			3.0553	4.9626	10.1949	12.4531	12.1207	8.0101	6.2394	6.7809	no	yes	yes	hypothetical protein LOC100381624 (LOC100381624), mRNA	hypothetical protein LOC100381624	phosphoglycerate kinase activity;glycolysis;phosphoglycerate kinase activity;glycolysis	Phosphoglycerate_kinase; Phosphoglycerate_kinase_CS	Eukaryota
2	GRMZM2G431850			0.7571	1.0811	2.5889	2.1466	2.7909	0.8121	0.423	1.0317	no	no	no	NA	NA	NA	Pentatricopeptide_repeat	Embryophyta
2	GRMZM2G027049			2.6445	3.5794	5.2517	4.1441	5.4426	2.7176	2.1071	4.8906	no	no	no	NA	NA	NA	WD40_repeat_sg; WD40_repeat-like_dom; WD40_repeat; WD40_repeat_CS; G-protein_beta_WD-40_rep_reg	Eukaryota
2	GRMZM2G158308			0.9243	0.8267	2.2564	2.3451	2.3164	0.3273	0.313	0.4998	no	no	no	NA	NA	NA	Pentatricopeptide_repeat	Embryophyta
2	GRMZM2G139691			3.8643	2.3337	4.5285	5.7842	5.8042	1.8574	1.3674	2.3225	no	no	no	hypothetical protein LOC100273782 (LOC100273782), mRNA	hypothetical protein LOC100273782	membrane	NA	Embryophyta
2	GRMZM2G125768			12.7589	14.6905	30.3818	26.4603	28.6607	9.5282	6.0686	13.9042	no	no	no	NA	NA	NA	Choline_transptr-like	Eukaryota
2	GRMZM2G465444			1.6443	1.8813	4.625	3.7721	4.1767	1.2715	0.6534	1.3406	no	no	no	NA	NA	NA	Pentatricopeptide_repeat	Embryophyta
2	GRMZM2G083437			10.0251	13.4651	26.9567	22.9078	25.4122	11.7808	5.889	10.5371	no	no	no	NA	NA	magnesium ion binding;inorganic diphosphatase activity;cytoplasm;phosphate metabolic process	Nop14; Pyrophosphatase	Eukaryota
2	GRMZM2G067546	vacs1	vacuolar sorting receptor homolog1	5.8326	7.5936	12.1606	12.0813	13.1727	8.134	3.7167	7.5915	no	no	no	NA	NA	calcium ion binding	Protease-assoc_domain; Growth_fac_rcpt; Thioredoxin-like_fold; EGF_Ca-bd; EGF-type_Asp/Asn_hydroxyl_site; EGF-like_reg_CS; EGF_Ca-bd_CS	Viridiplantae
2	GRMZM5G838938			5.1447	6.3508	18.8679	15.9878	22.4459	2.3605	3.2281	4.2152	no	yes	no	NA	NA	NA	NA	Eukaryota
2	GRMZM2G392956			4.102	5.8411	9.2573	10.8482	12.6219	2.7937	1.628	4.017	no	yes	no	hypothetical protein LOC100194194 (LOC100194194), mRNA	NA	calcium ion binding	EF-hand; EPS15_homology; EF_hand_Ca-bd; EF_Hand_1_Ca_BS	Eukaryota
2	AC191601.1_FG003			0.1571	0.0763	1.1185	0.9458	1.3401	0.1092	0	0.0963	no	no	no	NA	NA	NA	NA	Panicoideae
2	GRMZM5G851564			2.3939	2.4283	3.1587	3.0822	2.9017	1.9676	1.0787	2.6164	no	no	no	NA	NA	NA	Pentatricopeptide_repeat	Embryophyta
2	GRMZM2G132936			12.8163	10.2329	14.6136	12.5781	14.1074	7.0852	3.0441	8.7364	no	no	no	NA	NA	nucleic acid binding;zinc ion binding;homoiothermy;ice binding;response to freezing;nucleic acid binding;zinc ion binding;homoiothermy;ice binding;response to freezing	Filamin/ABP280_repeat-like; RRM_RNP1; Ig_E-set; Filamin; Znf_CCCH; Antifreeze_1	Viridiplantae
2	GRMZM2G429442			2.3734	4.6001	4.7304	5.2499	5.9908	2.5874	1.2221	2.5104	no	no	no	NA	NA	NA	NA	Eukaryota
2	GRMZM2G011588			2.2513	3.7296	5.2052	5.0287	6.3476	2.7686	1.6827	4.2932	no	no	no	BEL1-related homeotic protein 30 (LOC100281572), mRNA	BEL1-related homeotic protein 30;BEL1-related homeotic protein 30	transcription factor activity;nucleus;regulation of transcription, DNA-dependent;transcription regulator activity;sequence-specific DNA binding;transcription factor activity;nucleus;regulation of transcription, DNA-dependent;transcription regulator activity;sequence-specific DNA binding	POX; Homeobox; Homeodomain-like; HTH_lambrepressr; Homeobox_CS	Eukaryota
2	GRMZM2G022884			0.7864	0.7963	1.057	0.9189	1.2029	0.8292	0.347	0.7002	no	no	no	NA	NA	NA	Pentatricopeptide_repeat	Magnoliophyta
2	GRMZM2G378906			12.726	22.655	52.2711	51.3615	58.599	15.9512	6.5343	18.7259	yes	yes	no	hypothetical protein LOC100383446 (LOC100383446), mRNA	hypothetical protein LOC100383446;hypothetical protein LOC100384840	structural molecule activity;binding;protein binding;intracellular protein transport;vesicle-mediated transport;membrane coat;COPI vesicle coat	Clathrin/coatomer_adapt-like_N; Coatomer_bsu_C; ARM-type_fold; Coatomer_beta_subunit	Eukaryota
2	GRMZM2G436226			0.5807	0.7921	3.2816	3.6004	3.8292	0.2588	0.0522	0.3314	no	no	no	NA	NA	DNA binding;protein binding;nucleus;transcription initiation;zinc ion binding;histone modification	AT_hook_DNA-bd_motif; SWIB_MDM2_domain; Plus-3; Znf_FYVE_PHD; Znf_PHD; SWIB_domain; Plus3-dom_subgr; Zinc_finger_PHD-type_CS; AT_hook-like	Embryophyta
2	GRMZM2G099328			1.481	1.2683	2.5438	2.8099	3.4995	1.3086	0.7126	1.4525	no	no	no	zinc ion binding protein (LOC100281489), mRNA	zinc ion binding protein;zinc ion binding protein;zinc ion binding protein	zinc ion binding;zinc ion binding;zinc ion binding;zinc ion binding	Ubiquitin-int_motif; Znf_LIM	Viridiplantae
2	GRMZM2G068340			4.5969	3.8746	7.5945	8.5438	8.9145	2.5509	1.4854	3.1965	no	no	no	hypothetical protein LOC100193479 (LOC100193479), mRNA	hypothetical protein LOC100193479;hypothetical protein LOC100193479	NA	Cyclin-like; Cyclin	Eukaryota
2	AC196278.2_FG003			7.496	12.5109	43.5943	43.3093	41.9926	18.7307	10.32	26.952	no	yes	no	NA	NA	nucleic acid binding	PolynucTfrase_RNaseH_fold	Eukaryota
2	GRMZM2G025671			3.3425	3.0993	7.6392	7.0327	8.0692	1.9659	1.0349	2.5088	no	no	no	auxin-independent growth promoter protein (LOC100286197), mRNA	auxin-independent growth promoter protein	NA	NA	Embryophyta
2	GRMZM2G103599			6.8164	6.6772	21.4599	18.9266	23.0356	3.4306	1.074	4.611	no	no	no	NA	NA	NA	NA	Eukaryota
2	GRMZM2G163277			5.472	7.5222	21.7406	16.6002	20.1333	3.5304	1.3421	4.5541	no	no	no	hypothetical protein LOC100383255 (LOC100383255), mRNA	hypothetical protein LOC100383255	NA	Cytokine_IL1-like	Eukaryota
2	GRMZM2G074514			5.4907	5.2582	13.4759	9.6575	12.3487	3.1738	1.4833	6.0517	no	no	no	NA	NA	membrane	NA	Viridiplantae
2	AC193754.3_FG008			0.9612	1.0261	4.4071	3.8749	3.999	1.3577	0.3907	0.9247	no	yes	no	NA	NA	ATP binding;mismatch repair;mismatched DNA binding	DNA_mismatch_repair_MutS-lik_N; DNA_mismatch_repair_MutS_core	Eukaryota
2	GRMZM2G013065			3.0513	5.4025	6.4603	7.6336	6.3401	6.6239	2.9769	4.716	no	no	no	NA	NA	nucleic acid binding	RRM_RNP1	Eukaryota
2	GRMZM2G097043			10.4599	13.6885	38.8847	31.7946	32.532	13.1948	6.2153	13.5883	no	yes	no	hypothetical protein LOC100383560 (LOC100383560), mRNA	hypothetical protein LOC100383560	phosphopyruvate hydratase complex;magnesium ion binding;gamma-glutamyltransferase activity;phosphopyruvate hydratase activity;iron ion binding;glycolysis;electron carrier activity;photosynthesis;carboxylic acid metabolic process;heme binding;integral to thylakoid membrane;transferase activity, transferring acyl groups, acyl groups converted into alkyl on transfer	NA	Embryophyta
2	GRMZM2G324860			1.0997	1.7263	3.28	2.3388	3.7147	1.1782	0.4713	1.0198	no	no	no	hypothetical protein LOC100216844 (LOC100216844), mRNA	hypothetical protein LOC100216844	NA	NA	Poaceae
2	GRMZM2G130724			4.6215	4.2725	7.4584	7.3858	7.1811	1.9733	1.8716	2.9242	no	no	no	hypothetical protein LOC100280056 (LOC100280056), mRNA	hypothetical protein LOC100280056	NA	FN_III; Fibronectin_III_dom	Tracheophyta
2	GRMZM2G012031			8.5509	12.8919	36.902	39.9008	59.9063	5.4119	3.9699	8.226	yes	yes	no	NA	NA	protein binding	Leu-rich_rpt	Embryophyta
2	GRMZM2G087161			4.022	5.0483	6.8118	7.7811	7.9101	4.4702	2.0695	2.8537	no	no	no	NA	NA	nucleotide binding;catalytic activity;signal transducer activity;G-protein coupled receptor protein signaling pathway;nucleoside-triphosphatase activity;guanyl nucleotide binding	A1pp; Histidine_triad_HIT; His_triad-like_motif; ATPase_AAA+_core; Histidine_triad_CS; Gprotein_alpha_su	Eukaryota
2	GRMZM2G109009			17.4255	19.1225	31.1003	39.6986	39.5962	11.9431	7.6792	16.5992	no	yes	no	hypothetical protein LOC100382126 (LOC100382126), mRNA	hypothetical protein LOC100382126	RNA binding;polynucleotide adenylyltransferase activity;nucleus;transcription;nucleotidyltransferase activity;RNA 3'-end processing;RNA polyadenylation;RNA binding;polynucleotide adenylyltransferase activity;nucleus;transcription;nucleotidyltransferase activity;RNA 3'-end processing;RNA polyadenylation;RNA binding;polynucleotide adenylyltransferase activity;nucleus;transcription;nucleotidyltransf…	PolA_pol_cen_dom; Nucleotidyltransferase; PolA_pol_RNA-bd_dom; NuclTrfase_I_C; PolyA_polymerase	Eukaryota
2	GRMZM2G061537			0.3106	0.569	0.5479	0.781	0.6283	0.1339	0.1976	0.39	no	no	no	NA	NA	protein kinase activity;protein serine/threonine kinase activity;ATP binding;protein amino acid phosphorylation;protein kinase activity;protein serine/threonine kinase activity;ATP binding;protein amino acid phosphorylation	Ser-Thr/Tyr-Pkinase; Kinase-like_dom; Tyr_Pkinase_cat_dom; Ser/Thr_prot_kinase_dom; Protein_kinase_ATP_BS	Embryophyta
2	AC150739.3_FG001			4.148	4.7111	6.1077	5.9495	6.3801	2.4068	1.3588	3.0575	no	no	no	hypothetical protein LOC100279903 (LOC100279903), mRNA	hypothetical protein LOC100279903	metal ion transport;metal ion binding	DUF296; Heavy-metal-associated_CS	Embryophyta
2	GRMZM2G104504			5.4161	5.502	15.8692	15.5151	19.2305	11.4276	3.7312	7.6646	no	yes	no	NA	NA	pantothenate kinase activity;ATP binding;coenzyme A biosynthetic process	NA	Eukaryota
2	AC203761.3_FG002			1.413	1.3742	3.8018	3.4217	4.398	0.347	0.0871	0.3755	no	no	no	NA	NA	nucleic acid binding;DNA binding;DNA topoisomerase activity;DNA topoisomerase type I activity;chromosome;DNA metabolic process;DNA topological change	Toprim_domain; Topo_IA_cen; Topo_IA_core; Toprim_dom_subgr; Topo_IA_2; Topo_IA_DNA-bd	Eukaryota
2	GRMZM2G109987	rld1	rolled leaf1	20.8738	26.364	63.6974	64.2658	83.0991	18.4008	18.5699	25.4966	no	yes	no	rolled leaf1 (rld1), mRNA;rolled leaf1 (rld1), mRNA	rolled leaf1;rolled leaf1	transcription factor activity;regulation of transcription, DNA-dependent;sequence-specific DNA binding;transcription factor activity;regulation of transcription, DNA-dependent;sequence-specific DNA binding;transcription factor activity;regulation of transcription, DNA-dependent;sequence-specific DNA binding;transcription factor activity;regulation of transcription, DNA-dependent;sequence-specific…	Homeobox; START_lipid-bd; MEKHLA; Homeodomain-like; TF_bZIP	Embryophyta
2	GRMZM2G095727			18.7596	23.7876	25.8901	27.4811	31.9997	8.3086	4.4512	8.7953	yes	no	no	hypothetical protein LOC100280240 (LOC100280240), mRNA	hypothetical protein LOC100280240	two-component response regulator activity;two-component signal transduction system (phosphorelay);regulation of transcription, DNA-dependent;two-component response regulator activity;two-component signal transduction system (phosphorelay);regulation of transcription, DNA-dependent	NA	Viridiplantae
2	GRMZM2G114570			35.3927	52.1791	61.7875	56.4784	64.7746	34.8919	20.2128	43.9797	no	no	no	ankyrin protein kinase-like (LOC100282582), mRNA	ankyrin protein kinase-like;ankyrin protein kinase-like;ankyrin protein kinase-like;ankyrin protein kinase-like	NA	DUF248_MeTrfase	Embryophyta
2	GRMZM2G145360			6.9764	9.0409	19.6089	16.3258	20.7241	7.1903	3.1552	5.7251	no	no	no	NA	NA	protein kinase activity;ATP binding;protein amino acid phosphorylation	OPR_PB1; Kinase-like_dom; Protein_kinase_ATP_BS	Eukaryota
2	GRMZM2G157369			1.5513	2.0999	3.1159	3.8595	4.3478	1.9222	1.0582	2.4303	no	no	no	hypothetical protein LOC100304404 (LOC100304404), mRNA	hypothetical protein LOC100304404	protein serine/threonine kinase activity;ATP binding;protein amino acid phosphorylation	ABC_1; Kinase-like_dom; Ser/Thr_prot_kinase_dom	Eukaryota
2	GRMZM2G131334			13.7013	14.4555	25.303	23.1374	27.7505	9.8867	7.8568	16.6375	no	no	no	hypothetical protein LOC100278992 (LOC100278992), mRNA	hypothetical protein LOC100278992	protein kinase activity;protein serine/threonine kinase activity;MAP kinase activity;ATP binding;protein amino acid phosphorylation;protein kinase activity;protein serine/threonine kinase activity;MAP kinase activity;ATP binding;protein amino acid phosphorylation	NA	Viridiplantae
2	GRMZM2G021044			6.5917	6.0369	11.5485	11.2174	12.4734	4.3754	1.8671	5.5746	no	no	no	SET domain-containing protein SET104 (SET104), mRNA	SET domain-containing protein SET104;SET domain-containing protein SET104	nucleus;zinc ion binding;chromatin modification;histone-lysine N-methyltransferase activity;nucleus;zinc ion binding;chromatin modification;histone-lysine N-methyltransferase activity	SRA_YDG; Pre-SET_dom; SET_dom; Pre-SET_Zn-bd_sub; Post-SET_dom	Eukaryota
2	GRMZM2G473138			2.1262	1.644	5.0148	6.4669	7.7965	0.6894	0.3961	1.278	no	no	no	NA	NA	NA	SET_dom	Eukaryota
2	GRMZM2G084164			7.2027	6.3229	8.5001	11.2662	11.7504	4.0326	2.1476	4.3526	no	no	no	NA	NA	protein binding;zinc ion binding;protein binding;zinc ion binding;protein binding;zinc ion binding	Znf_FYVE_PHD; Znf_PHD	Magnoliophyta
2	GRMZM2G154489			11.6634	16.2253	29.6977	25.9027	30.8994	11.7601	6.4229	14.2533	no	no	no	calcium-dependent protein kinase (CPK2), mRNA;calcium-dependent protein kinase (CPK2), mRNA	calcium-dependent protein kinase;calcium-dependent protein kinase	protein kinase activity;protein serine/threonine kinase activity;calcium ion binding;ATP binding;protein amino acid phosphorylation;protein kinase activity;protein serine/threonine kinase activity;calcium ion binding;ATP binding;protein amino acid phosphorylation	Se/Thr_prot_kinase-like_dom; Ser-Thr/Tyr-Pkinase; EF-hand; Kinase-like_dom; Tyr_Pkinase_cat_dom; Ser/Thr_prot_kinase_dom; EF_hand_Ca-bd; EF_Hand_1_Ca_BS; Protein_kinase_ATP_BS; Ser/Thr_prot_kinase_AS	Embryophyta
2	GRMZM2G329300			9.1597	10.7983	22.3796	27.6022	29.8041	4.7746	2.9338	6.1665	no	yes	no	NA	NA	pathogenesis;outer membrane	Hep_Hag; K_chnl_volt-dep_Kv1.4	Magnoliophyta
2	GRMZM2G082293			9.1586	8.9373	20.9077	17.4508	26.4035	3.6647	2.5084	4.7947	no	no	no	NA	NA	NA	DUF630; DUF632	Magnoliophyta
2	GRMZM2G349344			0.5121	1.1145	0.9658	0.8031	1.2864	0.4702	0.3145	0.5111	no	no	no	NA	NA	ubiquitin ligase complex;protein kinase activity;protein serine/threonine kinase activity;ubiquitin-protein ligase activity;ATP binding;protein amino acid phosphorylation;protein ubiquitination	Se/Thr_prot_kinase-like_dom; Ser-Thr/Tyr-Pkinase; Ubox_domain; Kinase-like_dom; Tyr_Pkinase_cat_dom; Ser/Thr_prot_kinase_dom; Protein_kinase_ATP_BS	Eukaryota
2	GRMZM5G891724			1.2785	1.5993	3.118	2.9197	4.131	1.3169	0.6541	1.2809	no	no	no	hypothetical protein LOC100216675 (LOC100216675), mRNA	hypothetical protein LOC100216675	NA	VPS9; VPS9_sub	Eukaryota
2	GRMZM2G401062			4.1561	3.9509	9.1591	7.4071	9.9002	1.9741	1.8449	3.3124	no	no	no	NA	NA	NA	NA	Magnoliophyta
2	GRMZM2G376595			2.3441	2.6308	4.0019	3.9617	5.5869	1.5264	1.0861	2.2283	no	yes	no	NA	NA	phosphatidylcholine-sterol O-acyltransferase activity;lipid metabolic process	NA	Eukaryota
2	GRMZM2G130109			5.8968	5.1672	9.8354	8.0812	9.124	2.7124	1.5459	4.1593	no	no	no	LOC100193239 (cl8738_1b), mRNA	LOC100193239;LOC100193239	NA	F-box_dom_cyclin-like; F-box_dom_Skp2-like	Embryophyta
2	GRMZM2G048435			5.1461	4.338	8.1926	7.4484	9.885	3.1833	2.0474	4.9369	no	no	no	hypothetical protein LOC100304395 (LOC100304395), mRNA	hypothetical protein LOC100304395;hypothetical protein LOC100304395	NA	NA	Viridiplantae
2	GRMZM2G138125			10.2048	13.5412	29.7546	39.0959	41.9202	7.6662	4.7719	9.9067	no	yes	no	hypothetical protein LOC100384583 (LOC100384583), mRNA	hypothetical protein LOC100384583	nucleic acid binding;DNA binding;helicase activity;histamine receptor activity;ATP binding;G-protein coupled receptor protein signaling pathway;integral to membrane;nucleic acid binding;DNA binding;helicase activity;histamine receptor activity;ATP binding;G-protein coupled receptor protein signaling pathway;integral to membrane;nucleic acid binding;DNA binding;helicase activity;histamine receptor…	SNF2_N; DNA/RNA_helicase_C; FH2_actin-bd; DEAD-like_N; Histamine_H3_recept	Eukaryota
2	GRMZM2G092595			3.1623	4.9701	9.1432	10.0855	15.5113	2.3722	1.6528	2.666	no	no	yes	NA	NA	phosphatidylinositol phosphate kinase activity;phosphatidylinositol metabolic process	PInositol-4-P-5-kinase_core; PInositol-4P-5-kinase_core_sub	Eukaryota
2	GRMZM2G135430			1.1232	1.151	2.8803	2.5082	3.5118	0.5943	0.3976	0.7991	no	no	no	NA	NA	NA	Pentatricopeptide_repeat	Magnoliophyta
2	GRMZM2G124335			24.9594	34.4779	55.6131	70.7704	68.5605	16.5757	16.0744	39.2291	no	no	no	LOC100193451 (pco121523), mRNA	LOC100193451	catalytic activity;metabolic process;catalytic activity;fatty acid biosynthetic process;metabolic process;transferase activity, transferring acyl groups other than amino-acyl groups;catalytic activity;metabolic process;catalytic activity;metabolic process;catalytic activity;metabolic process	Ketoacyl_synth_C; Thiolase-like	Eukaryota
2	GRMZM2G181522			11.1691	13.0069	17.1538	19.6174	21.2457	7.2207	5.4423	12.1213	no	no	no	NA	NA	NA	Ankyrin_rpt; Ankyrin_rpt-contain_dom	Magnoliophyta
2	GRMZM2G361220			18.5889	35.4729	52.0548	53.7016	58.2394	33.7808	25.9423	21.8733	yes	yes	yes	AP-1 complex subunit sigma-2 (LOC100281970), mRNA;AP-1 complex subunit sigma-2 (LOC100281970), mRNA	AP-1 complex subunit sigma-2;AP-1 complex subunit sigma-2	protein binding;transport;intracellular protein transport;vesicle-mediated transport;membrane coat;protein binding;transport;intracellular protein transport;protein transporter activity;protein transport;vesicle-mediated transport;membrane coat;protein binding;transport;intracellular protein transport;protein transporter activity;protein transport;vesicle-mediated transport;membrane coat	NA	Eukaryota
2	GRMZM2G004087			3.8807	4.3851	12.9568	16.6387	19.9886	4.697	1.5911	5.0678	no	no	no	NA	NA	NA	NA	Eukaryota
2	GRMZM2G360835			2.465	2.8998	3.7645	3.867	5.4955	1.0478	0.7685	1.7603	no	no	no	NA	NA	catalytic activity;biosynthetic process;pyridoxal phosphate binding	NHTrfase_class1_PyrdxlP-BS	commelinids
2	GRMZM2G145088			8.8826	10.3336	21.5488	20.4145	23.5932	4.9494	2.5365	5.6432	no	no	no	LOC100193029 (pco108452), mRNA	LOC100193029	calcium ion binding	EF-hand; EPS15_homology; EF_hand_Ca-bd; EF_Hand_1_Ca_BS	Eukaryota
2	GRMZM2G410515	vp5	viviparous5	3.4337	2.602	5.6838	4.985	5.704	1.4999	1.3838	1.5663	no	no	no	phytoene desaturase (pds1), mRNA	phytoene desaturase	plastid;carotenoid biosynthetic process;oxidoreductase activity;oxidoreductase activity, acting on paired donors, with incorporation or reduction of molecular oxygen;oxidation reduction	NA	Eukaryota
2	GRMZM2G331652			4.0538	3.5767	6.9424	6.0599	7.0471	2.4021	1.305	3.1372	no	no	no	NA	NA	NA	AminoTfrase-like_pln_mobile; DUF724	Magnoliophyta
2	GRMZM2G003635			4.9072	4.8659	8.5181	8.341	9.4243	2.255	2.7285	6.7297	no	no	no	NA	NA	protein folding;heat shock protein binding;unfolded protein binding;heat shock protein binding	DnaJ_N	Eukaryota
2	GRMZM2G574858			10.0868	12.4354	15.3976	15.3438	18.2131	4.7222	2.6749	6.0116	no	no	no	NA	NA	nucleic acid binding;DNA binding;helicase activity;ATP binding	SNF2_N; DNA/RNA_helicase_C; DEAD-like_N	Eukaryota
2	GRMZM2G338259			57.4894	81.8602	121.351	120.115	166.652	52.6576	31.1834	50.4687	no	no	no	hypothetical protein LOC100274571 (LOC100274571), mRNA	hypothetical protein LOC100274571	DNA binding;nucleus;regulation of transcription, DNA-dependent;response to hormone stimulus;regulation of transcription;DNA binding;nucleus;regulation of transcription, DNA-dependent;response to hormone stimulus;regulation of transcription	TF_B3; Auxin_resp; AUX_IAA	Embryophyta
2	GRMZM2G173852			6.2737	4.1946	10.6803	13.3675	15.6623	2.7622	1.6532	3.9717	no	no	no	hypothetical protein LOC100272699 (LOC100272699), mRNA	hypothetical protein LOC100272699;hypothetical protein LOC100272699	DNA binding;thyroid hormone receptor activity;nucleus;regulation of transcription, DNA-dependent;protein binding;zinc ion binding	Znf_PHD-finger; Znf_FYVE_PHD; Acyl_CoA_acyltransferase; Znf_PHD; Zinc_finger_PHD-type_CS	Eukaryota
2	GRMZM2G084181			10.9999	11.1094	28.372	33.1421	41.1075	4.4368	3.2677	6.3941	yes	yes	no	NA	NA	nucleotide binding;ATP binding;transport;integral to membrane;ATPase activity;nucleoside-triphosphatase activity;ATPase activity, coupled to transmembrane movement of substances;transmembrane transport	ABC_transptr_TM_dom; ABC_transporter-like; ABC_transptrTM_dom_typ1; ATPase_AAA+_core; ABC_transporter_CS	Eukaryota
2	GRMZM2G056365			1.9274	2.6681	5.7361	7.254	7.8589	3.1108	1.9798	4.2015	no	yes	yes	NA	NA	NA	NA	Magnoliophyta
2	GRMZM2G083950	crp1	chloroplast RNA processing1	1.8204	1.9526	5.4128	4.1896	4.7428	1.3675	1.208	3.4088	no	no	no	chloroplast RNA processing1 (crp1), mRNA	chloroplast RNA processing1	NA	Pentatricopeptide_repeat	Embryophyta
2	GRMZM2G095865			13.5254	15.1981	54.5055	54.5084	57.0056	11.5397	8.1541	19.0818	no	yes	yes	NA	NA	DNA binding;DNA topoisomerase activity;DNA topoisomerase (ATP-hydrolyzing) activity;ATP binding;chromosome;DNA topological change;DNA binding;DNA topoisomerase activity;DNA topoisomerase (ATP-hydrolyzing) activity;ATP binding;chromosome;DNA topological change	NA	Eukaryota
2	GRMZM2G330455			1.7043	2.1084	3.4255	3.3889	4.8537	0.7814	0.4021	0.6312	no	no	yes	NA	NA	NA	AminoTfrase-like_pln_mobile	Poaceae
2	GRMZM2G042295			2.9096	3.0174	6.4589	6.9532	8.8572	2.1001	1.4909	3.1446	no	no	no	hypothetical protein LOC100382186 (LOC100382186), mRNA	hypothetical protein LOC100382186	NA	DUF248_MeTrfase	Embryophyta
2	GRMZM2G344476			1.5732	3.8192	6.1751	6.1898	5.1855	2.187	1.1027	2.0714	no	yes	yes	LOC100273486 (cl483_1), mRNA	LOC100273486	acyl-CoA metabolic process;acyl-CoA thioesterase activity	cNMP-bd; Acyl_CoA_thio; cNMP-bd-like	Eukaryota
2	GRMZM2G101527			0.4539	0.4307	2.7238	2.2396	2.1236	0.4427	0.2536	0.5396	no	no	no	NA	NA	NA	NA	Poaceae
2	GRMZM2G403003			3.672	4.6688	6.8295	7.7941	9.8081	3.5214	1.5578	3.6837	no	yes	no	hypothetical protein LOC100381614 (LOC100381614), mRNA	hypothetical protein LOC100381614	NA	NA	Magnoliophyta
2	GRMZM2G049288			2.2692	2.2428	6.6779	7.2044	10.6666	0.6981	0.5254	1.3486	no	no	no	NA	NA	binding;heat shock protein binding	DnaJ_N; ARM-type_fold	Eukaryota
2	GRMZM2G125432			1.1844	1.1817	1.9946	2.2237	3.2891	0.5822	0.2933	0.7386	no	no	no	NA	NA	intracellular;nucleus;zinc ion binding;chromatin modification;histone-lysine N-methyltransferase activity;intracellular;nucleus;zinc ion binding;chromatin modification;histone-lysine N-methyltransferase activity	Pre-SET_dom; SET_dom; Znf_C2H2-like; Pre-SET_Zn-bd_sub; Post-SET_dom; Znf_C2H2	Eukaryota
2	GRMZM2G142863			7.2198	8.5295	13.3913	11.1417	14.8195	5.9165	3.3898	6.1443	no	no	no	hypothetical protein LOC100383579 (LOC100383579), mRNA	hypothetical protein LOC100383579;hypothetical protein LOC100383579	oxoglutarate dehydrogenase (succinyl-transferring) activity;glycolysis;metabolic process;oxidoreductase activity, acting on the aldehyde or oxo group of donors, disulfide as acceptor;thiamin pyrophosphate binding;oxoglutarate dehydrogenase (succinyl-transferring) activity;glycolysis;metabolic process;oxidoreductase activity, acting on the aldehyde or oxo group of donors, disulfide as acceptor;thi…	DH_E1; Transketolase-like_Pyr-bd; 2oxoglutarate_DH_E1	Eukaryota
2	GRMZM2G379913			4.1301	3.4217	22.8522	23.8068	32.5455	3.061	0.2591	3.0274	yes	yes	no	NA	NA	binding	ARM-type_fold	Eukaryota
2	GRMZM2G103230			16.0247	12.8929	21.253	26.7379	32.4291	8.447	4.5939	10.2705	no	no	no	NA	NA	protein binding;zinc ion binding	NA	Embryophyta
2	GRMZM2G474777			0.7118	0.538	1.2467	1.1048	1.0767	0.5872	0.1516	0.3265	no	no	no	NA	NA	protein kinase activity;protein serine/threonine kinase activity;protein binding;ATP binding;protein amino acid phosphorylation;defense response	LRR-contain_N2; Leu-rich_rpt; Se/Thr_prot_kinase-like_dom; Ser-Thr/Tyr-Pkinase; Kinase-like_dom; Leu-rich_rpt_typical-subtyp; Tyr_Pkinase_cat_dom; Ser/Thr_prot_kinase_dom; Disease_R; Protein_kinase_ATP_BS; Ser/Thr_prot_kinase_AS	Tracheophyta
2	GRMZM2G312933			2.2601	2.6146	3.8767	3.5097	4.6694	2.6672	1.677	0.7057	no	no	no	NA	NA	NA	NA	Magnoliophyta
2	GRMZM2G179106			9.0691	9.8981	13.8712	11.236	11.9177	3.5237	2.9607	6.8495	no	no	no	NA	NA	NA	Nodulin-like; MFS_general_subst_transpt	Embryophyta
2	GRMZM2G091632			24.3605	28.4547	43.7749	39.221	51.9542	13.3428	7.9274	18.3526	no	no	no	NA	NA	protein kinase activity;protein serine/threonine kinase activity;ATP binding;protein amino acid phosphorylation;beta-lactamase activity;beta-lactam antibiotic catabolic process;response to antibiotic;protein kinase activity;protein serine/threonine kinase activity;protein binding;ATP binding;protein amino acid phosphorylation;beta-lactamase activity;beta-lactam antibiotic catabolic process;respon…	Se/Thr_prot_kinase-like_dom; Ser-Thr/Tyr-Pkinase; Kinase-like_dom; Tyr_Pkinase_cat_dom; Ser/Thr_prot_kinase_dom; Protein_kinase_ATP_BS; Ser/Thr_prot_kinase_AS	Embryophyta
2	GRMZM2G159824			1.4868	1.4175	2.8784	2.9128	3.2502	0.4867	0.4326	0.898	no	no	no	NA	NA	NA	NA	Embryophyta
2	GRMZM2G023983			2.5908	2.5753	5.8129	4.9992	5.0574	1.8778	1.1892	2.3836	no	no	no	NA	NA	RNA splicing	Intron_maturse2	Embryophyta
2	GRMZM2G303312			3.6051	2.8568	6.9674	5.7475	5.783	2.0049	1.3052	2.7365	no	no	no	hypothetical protein LOC100193484 (LOC100193484), mRNA	hypothetical protein LOC100193484	NA	NA	Eukaryota
2	GRMZM2G470914			3.2995	4.4906	12.7291	13.5267	16.8017	2.1874	1.0989	4.9435	no	no	no	NA	NA	NA	NA	Embryophyta
2	AC209208.3_FG001			2.2996	2.7584	5.7641	6.2053	7.6675	1.7133	0.6957	2.0353	no	yes	no	NA	NA	protein kinase activity;protein serine/threonine kinase activity;ATP binding;protein amino acid phosphorylation	Se/Thr_prot_kinase-like_dom; Ser-Thr/Tyr-Pkinase; Kinase-like_dom; Tyr_Pkinase_cat_dom; Ser/Thr_prot_kinase_dom; Protein_kinase_ATP_BS	Eukaryota
2	GRMZM5G857930			15.0383	14.9471	19.8311	18.2601	19.0033	8.7102	5.8924	12.3281	no	no	no	hypothetical protein LOC100273602 (LOC100273602), mRNA	hypothetical protein LOC100273602	telomere maintenance;nuclear chromosome, telomeric region;DNA binding	NA	Embryophyta
2	GRMZM2G115564			2.6686	2.8612	5.493	6.1604	7.0838	1.9825	1.0745	3.028	no	no	no	RNA polymerase2 (rpo2), mRNA	RNA polymerase2;RNA polymerase2	DNA binding;DNA-directed RNA polymerase activity;transcription;DNA binding;DNA-directed RNA polymerase activity;transcription	DNA-dir_RNA_pol_phage	Eukaryota
2	GRMZM2G061684			1.7207	2.668	4.0556	5.0158	6.153	1.3289	0.8431	1.7191	no	yes	yes	NA	NA	DNA binding;protein tyrosine phosphatase activity;protein amino acid dephosphorylation;protein tyrosine/serine/threonine phosphatase activity;dephosphorylation;phosphatase activity	Actin-fragmin_kin_cat; Dual-sp_phosphatase_cat-dom; Kinase-like_dom; Dual-sp_phosphatase_subgr_cat; Tyr_Pase_cat; Znf_BED_prd; Tyr_Pase_AS	Eukaryota
2	GRMZM2G133966			2.7295	5.5828	7.054	7.3614	6.1337	1.5932	1.6145	2.4651	no	no	no	NA	NA	catalytic activity;trehalose biosynthetic process;homoiothermy;ice binding;response to freezing	Glyco_trans_20; Antifreeze_1	Eukaryota
2	GRMZM2G017741			5.1926	6.192	7.3987	6.8074	8.5141	2.4293	1.9521	3.3235	no	no	yes	hypothetical protein LOC100382271 (LOC100382271), mRNA	hypothetical protein LOC100382271	NA	NA	Tracheophyta
2	GRMZM2G045287			2.0162	6.5295	8.0374	7.9982	9.7575	5.653	4.5505	5.758	no	yes	no	LOC100282614 (TIDP3389), mRNA	LOC100282614	Golgi apparatus;cellular cell wall organization;glycogenin glucosyltransferase activity;plant-type cell wall;transferase activity, transferring hexosyl groups;cell junction;cellulose biosynthetic process	UPTG_synth	Viridiplantae
2	GRMZM2G389303			15.7125	16.6948	35.5327	28.3291	39.5359	10.0078	5.8393	12.6212	no	no	no	NA	NA	metabolic process;amino acid binding	ACT-bd	Eukaryota
2	GRMZM2G141399	du1	dull endosperm1	9.1693	7.8173	11.3626	11.1978	10.7737	3.8241	2.359	4.9842	no	no	no	starch synthase DULL1 (dull1), mRNA	starch synthase DULL1	starch synthase activity;biosynthetic process;glucan biosynthetic process;starch synthase activity;glucan biosynthetic process	Starch_synth_cat_dom; GlgA	Eukaryota
2	GRMZM2G108912			2.6059	2.4391	8.1374	6.4799	7.4613	3.5696	1.0998	3.2819	no	no	no	NA	NA	catalytic activity;phospholipase D activity;calcium ion binding;metabolic process;membrane;phosphatidylcholine metabolic process	C2_Ca-dep; PLipase_D/transphosphatidylase; C2_Ca/lipid-bd_dom_CaLB; PLD_pln	Eukaryota
2	GRMZM2G006977			3.7037	11.9354	27.0163	20.5476	25.2056	8.7929	9.9529	22.1806	yes	yes	yes	hypothetical protein LOC100383926 (LOC100383926), mRNA	hypothetical protein LOC100383926	catalytic activity;calcium-transporting ATPase activity;ATP binding;ATP biosynthetic process;cation transport;calcium ion transport;metabolic process;calcium ion transmembrane transporter activity;ATPase activity, coupled to transmembrane movement of ions, phosphorylative mechanism;membrane;hydrolase activity, acting on acid anhydrides, catalyzing transmembrane movement of substances	ATPase_P-typ_cation-transptr_N; ATPase_P-typ_ATPase-assoc-dom; Dehalogen-like_hydro; ATPase_P-typ_cation-transptr_C; ATPase_P-typ_ion-transptr; ATPase_P-typ_H-transp; ATPase_P-typ_cation-exchng_asu; ATPase_P-typ_P_site; ATPase_P-typ_Ca-transp_PMCA	Eukaryota
2	GRMZM2G150213			1.8823	1.9959	4.0943	4.6819	5.5066	2.6675	1.2932	2.4271	no	no	no	Ca2+/calmodulin-dependent protein kinase phosphatase (LOC100286097), mRNA	Ca2+/calmodulin-dependent protein kinase phosphatase;Ca2+/calmodulin-dependent protein kinase phosphatase;Ca2+/calmodulin-dependent protein kinase phosphatase	catalytic activity;intracellular;zinc ion binding;catalytic activity;intracellular;zinc ion binding;catalytic activity;intracellular;zinc ion binding;catalytic activity;intracellular;zinc ion binding;catalytic activity;intracellular;zinc ion binding	PP2C_N; PP2C-related; Znf_C2H2	Viridiplantae
2	GRMZM2G156986			31.2974	34.382	38.8798	36.5708	40.9214	13.8909	9.1702	13.1117	no	no	no	NA	NA	GTP binding;intracellular;small GTPase mediated signal transduction	MMR_HSR1_GTP-bd; NOG1_GTP-bd; NOG_C; GTP1_OBG; Ras_GTPase	Eukaryota
2	GRMZM2G423861			7.985	6.6939	13.3903	16.3314	17.2373	3.3933	2.5753	5.1888	no	no	no	NA	NA	microtubule motor activity;protein binding;ATP binding;cytoskeleton;microtubule-based movement;membrane;vesicle-mediated transport;microtubule motor activity;protein binding;ATP binding;cytoskeleton;microtubule-based movement;membrane;vesicle-mediated transport	MyTH4_dom; FERM_N; FERM_central; Kinesin_motor_dom; t-SNARE; Band_41_domain; Kinetochore_Spc7; Kinesin_motor_CS	Eukaryota
2	GRMZM2G027932			4.3683	4.7136	10.6502	15.0456	15.4446	2.7064	1.8457	3.8495	no	no	no	hypothetical protein LOC100280040 (LOC100280040), mRNA;hypothetical protein LOC100303933 (LOC100303933), mRNA;hypothetical protein LOC100303933 (LOC100303933), mRNA	hypothetical protein LOC100280040;hypothetical protein LOC100303933	NA	GYF	Embryophyta
2	GRMZM2G097843			0.9196	1.0501	3.0285	3.1254	3.5313	0.7145	0.4571	0.9744	no	yes	no	NA	NA	DNA binding	Homeodomain-like; SANT_DNA-bd	Tracheophyta
2	GRMZM2G333183			0.2723	0.3389	0.7875	1.0682	1.2915	0.1015	0.06	0.2367	no	no	no	NA	NA	nucleotide binding;ATP binding;carbohydrate metabolic process;transport;phosphoribulokinase activity;peptide transporter activity;peptide transport;membrane;integral to membrane;ATPase activity;nucleoside-triphosphatase activity;ATPase activity, coupled to transmembrane movement of substances;transmembrane transport	ABC_transptr_TM_dom; ABC_transporter-like; ABC_transptrTM_dom_typ1; ATPase_AAA+_core; PRK; ABC_B2; ABC_transporter_CS	Embryophyta
2	GRMZM2G155980			7.4403	6.4969	9.5313	10.7319	10.6579	5.6385	2.5999	5.7734	no	no	no	NA	NA	DNA binding;zinc ion binding;phosphopantetheine binding;homoiothermy;ice binding;response to freezing;DNA binding;zinc ion binding;homoiothermy;ice binding;response to freezing	TF_FAR1-related; MULE_transposase_cons-dom; Znf_SWIM; AT_hook_DNA-bd_motif; Znf_PMZ; Antifreeze_1	Magnoliophyta
2	GRMZM2G330229			2.0045	2.4196	8.9819	10.0934	10.0564	1.615	1.1844	4.1164	no	no	no	hypothetical protein LOC100272503 (LOC100272503), mRNA	hypothetical protein LOC100272503	G-protein coupled receptor protein signaling pathway;integral to membrane	NA	Poaceae
2	GRMZM2G322090			10.0935	9.5375	27.5137	36.9809	39.4636	6.7612	3.376	7.0211	no	yes	no	NA	NA	NA	CXC	Eukaryota
2	GRMZM2G320399			3.7824	3.7902	5.2041	6.2008	7.1653	1.8895	1.0614	2.2209	no	yes	no	NA	NA	protein binding;zinc ion binding	Haemerythrin/HHE_cat-bd_motif; Znf_CHY; Znf_RING	Eukaryota
2	GRMZM2G033724			14.6668	16.9347	22.9418	17.7702	23.6536	15.077	6.609	9.4898	no	yes	no	NA	NA	catalytic activity;catalytic activity;catalytic activity	NA	Embryophyta
2	GRMZM2G344924			28.6517	30.2426	34.2726	35.8	40.3109	9.1111	5.5923	12.751	no	no	no	NA	NA	nuclear pore;transport	Peptidase_S59	Eukaryota
2	GRMZM5G891430			0.1282	0.5565	1.8265	1.6619	1.7592	0.8073	1.1513	0.7566	no	no	no	NA	NA	NA	Galactose-bd-like	NA
2	GRMZM2G059015			52.7271	56.9635	74.5964	68.4029	78.2938	19.6171	11.3483	26.1442	no	no	no	hypothetical protein LOC100279429 (LOC100279429), mRNA	hypothetical protein LOC100279429	nuclear pore;transport	Peptidase_S59	Eukaryota
2	GRMZM2G018595			11.9039	7.9553	14.0169	13.0886	13.1984	4.1439	3.9139	7.1525	no	no	yes	ATP binding protein (LOC100284690), mRNA;hypothetical protein LOC100384624 (LOC100384624), mRNA	ATP binding protein;ATP binding protein;hypothetical protein LOC100384082	protein kinase activity;protein serine/threonine kinase activity;ATP binding;protein amino acid phosphorylation;protein kinase activity;ATP binding;protein amino acid phosphorylation;protein kinase activity;protein serine/threonine kinase activity;ATP binding;protein amino acid phosphorylation;protein kinase activity;protein serine/threonine kinase activity;ATP binding;protein amino acid phosphor…	Heavy-metal-associated_CS	Embryophyta
2	GRMZM2G158575			9.234	9.3221	13.637	15.4489	15.5629	5.0235	4.3337	8.9777	no	no	no	hypothetical protein LOC100383212 (LOC100383212), mRNA	hypothetical protein LOC100383212	NA	TPR_repeat	Eukaryota
2	GRMZM2G158452			1.2068	1.8891	2.8964	4.205	3.7674	0.7425	0.6522	1.8612	no	yes	no	hypothetical protein LOC100383403 (LOC100383403), mRNA	hypothetical protein LOC100383403	sugar:hydrogen symporter activity;transport;phosphoenolpyruvate-dependent sugar phosphotransferase system;sugar:hydrogen symporter activity;transport;phosphoenolpyruvate-dependent sugar phosphotransferase system;sugar:hydrogen symporter activity;transport;phosphoenolpyruvate-dependent sugar phosphotransferase system	PTS_EIIA_2	Embryophyta
2	GRMZM2G341405			18.7977	28.4163	54.0245	45.2667	51.2268	31.7289	13.6638	25.4943	no	no	yes	NA	NA	two-component response regulator activity;two-component signal transduction system (phosphorelay);inorganic diphosphatase activity;binding;regulation of transcription, DNA-dependent;hydrogen-translocating pyrophosphatase activity;proton transport;membrane;two-component response regulator activity;two-component signal transduction system (phosphorelay);regulation of transcription, DNA-dependent;in…	NA	Eukaryota
2	GRMZM2G178120			5.8113	5.5534	13.2432	16.9776	18.1576	2.8254	2.5571	4.8845	no	yes	yes	hypothetical protein LOC100194097 (LOC100194097), mRNA	hypothetical protein LOC100194097;hypothetical protein LOC100194097	ubiquitin thiolesterase activity;intracellular;ubiquitin-dependent protein catabolic process;zinc ion binding;intracellular;zinc ion binding;ubiquitin thiolesterase activity;intracellular;ubiquitin-dependent protein catabolic process;zinc ion binding;intracellular;zinc ion binding	DUF627_N; DUF629; Znf_C2H2	Eukaryota
2	GRMZM2G063792			15.6994	24.1749	30.5723	35.9048	34.1943	25.9813	19.2446	22.626	no	yes	yes	LOC100280413 (cl31185_1), mRNA	LOC100280413;LOC100280413;LOC100280413;LOC100280413	protein serine/threonine kinase activity;ATP binding;protein amino acid phosphorylation;protein kinase activity;protein serine/threonine kinase activity;ATP binding;protein amino acid phosphorylation;protein serine/threonine kinase activity;ATP binding;protein amino acid phosphorylation;protein serine/threonine kinase activity;ATP binding;protein amino acid phosphorylation	Kinase-like_dom; Ser/Thr_prot_kinase_dom; Ser/Thr_prot_kinase_AS	Eukaryota
2	GRMZM2G443939			1.7815	1.6492	4.014	2.6197	4.0508	0.744	1.087	0.999	no	yes	no	NA	NA	protein binding;ATP binding;apoptosis;defense response	NB-ARC; Leu-rich_rpt; Leu-rich_rpt_typical-subtyp; Disease_R	Poaceae
2	GRMZM2G108694			1.2013	1.3083	2.9267	2.3006	2.8886	1.4372	0.9293	1.8697	no	no	no	hypothetical protein LOC100276442 (LOC100276442), mRNA	hypothetical protein LOC100276442	two-component sensor activity;two-component response regulator activity;two-component signal transduction system (phosphorelay);ATP binding;regulation of transcription, DNA-dependent;signal transduction;membrane;phosphorylation;transferase activity, transferring phosphorus-containing groups;two-component sensor activity;two-component response regulator activity;two-component signal transduction s…	Sig_transdc_His_kin_sub1_dim/P; ATPase-like_ATP-bd; Sig_transdc_resp-reg_receiver; CheY-like; Sig_transdc_His_kin-like_C	Eukaryota
2	GRMZM2G148941			0.4638	0.4251	2.0834	2.3164	3.0318	1.6003	0.2953	1.0499	no	no	no	NA	NA	NA	NA	Poaceae
2	GRMZM2G012453			2.7967	2.5999	4.5471	5.5184	5.5683	2.6547	1.5111	3.3114	no	no	no	NA	NA	nucleotide binding;nucleic acid binding;RNA binding;helicase activity;ATP binding;ATP-dependent helicase activity;nucleoside-triphosphatase activity	Rbsml_prot_S1_RNA-bd_dom; DNA/RNA_helicase_C; Helicase-assoc_dom; DUF1605; NA-bd_OB-fold-like; DEAD-like_N; ATPase_AAA+_core; DNA/RNA_helicase_DEAH_CS	Eukaryota
2	GRMZM2G337766			0.3938	0.4397	0.6401	0.5513	0.573	0.4302	0.0806	0.2897	no	no	no	NA	NA	protein kinase activity;protein serine/threonine kinase activity;protein binding;ATP binding;protein amino acid phosphorylation	Leu-rich_rpt; Ser-Thr/Tyr-Pkinase; Kinase-like_dom; Leu-rich_rpt_typical-subtyp; Tyr_Pkinase_cat_dom; Ser/Thr_prot_kinase_dom; Protein_kinase_ATP_BS; Ser/Thr_prot_kinase_AS	Embryophyta
2	GRMZM2G115372			0.8086	2.3367	2.4889	3.2478	3.9353	0.4685	0.6759	1.2335	no	no	no	hypothetical protein LOC100275095 (LOC100275095), mRNA;ATPase (LOC100285563), mRNA	ATPase	nucleotide binding;ATP binding;nucleoside-triphosphatase activity	ATPase_AFG1-like; ATPase_AAA+_core	Eukaryota
2	GRMZM2G137820			0.2028	0.8041	1.3661	1.464	1.8512	0.7056	0.4603	0.6149	no	no	no	NA	NA	NA	NA-bd_OB-fold-like	Poaceae
2	GRMZM2G105542			1.5689	1.6322	2.7553	2.4876	2.4295	0.9283	1.0769	2.1543	yes	no	no	hypothetical protein LOC100272731 (LOC100272731), mRNA	hypothetical protein LOC100272731	NA	Pentatricopeptide_repeat	Tracheophyta
2	GRMZM2G101390			8.1193	7.9697	9.9192	11.8038	12.0527	3.29	2.5545	4.26	no	no	no	NA	NA	NA	Prefoldin	Tracheophyta
2	GRMZM2G123537			3.5432	3.2601	9.3433	11.0628	11.4022	3.1809	1.707	4.6887	no	yes	no	NA	NA	RNA binding;binding	NABP	Eukaryota
2	GRMZM2G461569			4.4433	4.5661	11.8008	10.8422	13.1436	2.4257	1.9409	4.4548	no	no	no	hypothetical protein LOC100277946 (LOC100277946), mRNA	hypothetical protein LOC100277946	nitrogen compound metabolic process;urease activity;nickel ion binding;hydrolase activity;hydrolase activity, acting on carbon-nitrogen (but not peptide) bonds;urea metabolic process;nitrogen compound metabolic process;urease activity;nickel ion binding;nitrogen compound metabolic process;urease activity;nickel ion binding;nitrogen compound metabolic process;urease activity;nickel ion binding	Urease_alpha/gamma	Embryophyta
2	GRMZM2G146778			0.5578	0.3778	1.1312	1.2217	1.3005	0.4613	0.226	0.3303	no	no	no	NA	NA	phosphoglycerate mutase activity;cytoplasm;glucose catabolic process;manganese ion binding;phosphoglycerate mutase activity;cytoplasm;glucose catabolic process;manganese ion binding	BPG-indep_PGM_N	Eukaryota
2	GRMZM2G395114			0.4871	0.75	7.7614	8.1117	14.5734	0.5999	1.3635	3.2243	no	no	no	hypothetical protein LOC100383552 (LOC100383552), mRNA	hypothetical protein LOC100383552	transporter activity;transport;secondary active sulfate transmembrane transporter activity;sulfate transport;membrane;integral to membrane;transmembrane transport	NA	Eukaryota
2	GRMZM2G104047			12.5773	10.5463	17.6502	13.3932	15.6254	5.8252	2.8953	6.3933	no	no	no	NA	NA	NA	NA	Magnoliophyta
2	GRMZM2G118243			12.2894	10.6218	19.9719	20.1335	24.5856	7.3127	6.034	12.2463	no	no	no	hypothetical protein LOC100384030 (LOC100384030), mRNA	hypothetical protein LOC100384030	nucleotide binding;signal transducer activity;ATP binding;G-protein coupled receptor protein signaling pathway;membrane;ATPase activity;nucleoside-triphosphatase activity;guanyl nucleotide binding;nucleotide binding;ATP binding;membrane;ATPase activity;nucleoside-triphosphatase activity	ABC_transporter-like; ABC_2_trans; PDR_assoc; ATPase_AAA+_core	Embryophyta
2	GRMZM2G140500			1.9841	2.2421	7.0073	7.0363	8.9683	1.4676	0.7449	1.8821	no	yes	no	NA	NA	NA	NA	Magnoliophyta
2	GRMZM2G309660			5.4118	4.8701	8.0111	10.6995	11.6533	1.8709	1.8757	3.1151	no	no	no	hypothetical protein LOC100383271 (LOC100383271), mRNA	hypothetical protein LOC100383271	NA	NA	Magnoliophyta
2	GRMZM2G481231			0.3917	0.4213	0.9796	1.3172	1.3589	0.2489	0.1157	0.3211	no	no	no	NA	NA	NA	Pentatricopeptide_repeat; Elongation_fac_G/III/V	Embryophyta
2	GRMZM2G180335			10.1986	9.6401	15.8958	17.2262	18.9152	10.157	5.8671	12.3142	no	no	no	hypothetical protein LOC100279900 (LOC100279900), mRNA;hypothetical protein LOC100279900 (LOC100279900), mRNA	hypothetical protein LOC100279900;hypothetical protein LOC100279900	GTPase activity;GTP binding;GTPase activity;GTP binding;homoiothermy;ice binding;response to freezing;GTPase activity;GTP binding	Dynamin_central; GED	Eukaryota
2	GRMZM5G824439			9.9702	4.9294	31.8364	33.8085	39.8627	3.6837	0.7818	5.2177	yes	no	no	NA	NA	NA	NA	Embryophyta
2	GRMZM2G348675			12.7247	8.4732	20.8574	29.6542	29.8702	6.4113	4.4465	9.1102	no	no	no	hypothetical protein LOC100272594 (LOC100272594), mRNA	hypothetical protein LOC100272594	nuclear pore;transport	Nup84_Nup100	Eukaryota
2	GRMZM2G149060			1.8372	3.1937	7.3149	6.8963	10.9622	2.2785	0.1646	1.5319	no	no	no	NA	NA	NA	NA	Eukaryota
2	GRMZM2G385925			11.3413	11.0395	23.4795	18.82	21.9559	6.5685	4.1913	9.6096	no	no	no	NA	NA	DNA binding;transcription factor activity;microtubule motor activity;ATP binding;nucleus;regulation of transcription, DNA-dependent;microtubule-based movement;metabolic process;transferase activity;DNA binding;transcription factor activity;microtubule motor activity;ATP binding;nucleus;regulation of transcription, DNA-dependent;microtubule-based movement;metabolic process;transferase activity;mic…	Kinesin_motor_dom; Kinesin_motor_CS	Eukaryota
2	GRMZM2G005791			4.6703	5.2628	7.8325	7.9463	9.8291	2.7527	1.7577	3.5919	no	no	no	hypothetical protein LOC100384835 (LOC100384835), mRNA	hypothetical protein LOC100384835	ion channel activity;voltage-gated potassium channel activity;ion transport;potassium ion transport;membrane;transmembrane transport	cNMP-bd; cNMP-bd-like	Embryophyta
2	GRMZM2G070515			10.3924	12.3643	14.3776	11.9948	14.7104	8.0398	3.9825	8.0381	no	no	no	NA	NA	NA	NA	Poaceae
2	GRMZM2G163325			4.064	5.4585	15.0094	14.1306	14.7945	7.318	2.773	7.0146	no	no	no	NA	NA	GTPase activity;GTP binding	Dynamin	Eukaryota
2	GRMZM2G163359			0.9474	1.0545	1.4966	2.1975	1.9785	0.569	0.3005	0.656	no	no	no	NA	NA	NA	Pentatricopeptide_repeat	Magnoliophyta
2	AC233892.1_FG001			1.4789	2.2747	2.5842	2.0984	2.6903	0.5625	0.6381	0.5656	no	no	no	hypothetical protein LOC100381779 (LOC100381779), mRNA	hypothetical protein LOC100381779	NA	Pentatricopeptide_repeat	Tracheophyta
2	GRMZM2G056996			4.6687	3.1858	5.5267	6.5986	7.2125	1.5766	0.9726	2.0766	no	no	no	NA	NA	NA	Pentatricopeptide_repeat	Magnoliophyta
2	GRMZM2G105570			2.1099	2.4813	2.7181	3.0671	2.4458	1.8462	1.1176	3.0297	no	no	no	ABCF-type protein (ABCF1), mRNA	ABCF-type protein	nucleotide binding;ATP binding;ATPase activity;nucleoside-triphosphatase activity	ABC_transporter-like; ATPase_AAA+_core; ABC_transporter_CS	Eukaryota
2	GRMZM2G301071			8.0827	10.7244	13.4703	18.212	18.7426	6.4661	3.8385	8.8181	no	no	no	hypothetical protein LOC100384369 (LOC100384369), mRNA	hypothetical protein LOC100384369	catalytic activity	Cwf19-like_C_dom-1; Cwf19-like_C_dom-2; His_triad-like_motif; Tropomyosin	Eukaryota
2	GRMZM2G040078			6.6531	4.4324	9.0166	8.3011	10.6232	2.4687	1.3033	2.5308	no	no	no	NA	NA	intracellular	BRCT	Eukaryota
2	GRMZM2G301098			6.538	5.9353	9.6845	9.8593	12.8276	3.2274	2.1037	3.2448	no	no	no	NA	NA	nucleic acid binding;intracellular;zinc ion binding	NA	Magnoliophyta
2	GRMZM2G162426			4.9873	8.3442	23.5234	25.5823	24.2545	8.4016	7.3748	16.9816	no	yes	yes	NA	NA	catalytic activity;calcium-transporting ATPase activity;ATP binding;ATP biosynthetic process;cation transport;calcium ion transport;metabolic process;ATPase activity, coupled to transmembrane movement of ions, phosphorylative mechanism;membrane;integral to membrane;hydrolase activity, acting on acid anhydrides, catalyzing transmembrane movement of substances;ATP binding;ATP biosynthetic process;c…	ATPase_P-typ_cation-transptr_N; ATPase_P-typ_ATPase-assoc-dom; ATPase_P-typ_P_site; ATPase_P-typ_ion-transptr	Eukaryota
2	GRMZM2G150169			6.4117	9.9324	20.5212	17.7397	22.1041	7.3306	2.7367	7.7327	no	yes	no	NA	NA	NA	F-box_dom_cyclin-like; Leu-rich_rpt_Cys-con_subtyp	Eukaryota
2	GRMZM2G118309			2.6212	3.3641	6.5757	7.3436	9.3356	1.2885	0.9573	2.0749	no	yes	no	NA	NA	calcium ion binding	EF-hand; EPS15_homology; EF_hand_Ca-bd; EF_Hand_1_Ca_BS	Eukaryota
2	GRMZM2G429241			4.2362	6.1115	12.7422	13.0044	15.6198	2.7715	1.1983	3.661	no	no	no	NA	NA	NA	NA	Eukaryota
2	GRMZM2G079013			14.8656	14.4087	38.1727	36.264	39.9814	9.6263	6.2428	13.5569	no	yes	no	LOC100285175 (pco149257), mRNA	LOC100285175	NA	WD40_repeat_sg; WD40_repeat-like_dom; WD40_repeat; G-protein_beta_WD-40_rep_reg; WD40_repeat_CS	Embryophyta
2	GRMZM2G390400			3.4483	3.3852	7.4457	9.9658	10.1426	2.2107	1.2337	3.2935	no	yes	no	NA	NA	NA	NA	Eukaryota
2	GRMZM2G148723			17.3488	22.2069	23.9077	21.9038	24.0975	13.4046	8.2048	17.2413	no	no	no	hypothetical protein LOC100275686 (LOC100275686), mRNA;hypothetical protein LOC100279818 (LOC100279818), mRNA	hypothetical protein LOC100275686;hypothetical protein LOC100279818;hypothetical protein LOC100275686	nucleus;transcription regulator activity;regulation of transcription	Tropomyosin	Magnoliophyta
2	GRMZM2G333997			4.0162	5.0016	11.9667	12.8933	18.097	3.2543	2.719	8.3944	no	no	no	NA	NA	NA	NA	NA
2	GRMZM2G413162			1.6048	3.0956	12.4787	10.4688	11.671	2.6074	1.611	3.8721	no	yes	no	NA	NA	NA	Cas1p	Eukaryota
2	GRMZM2G023625			10.8115	13.7495	16.9453	18.8525	22.7953	4.9366	3.9558	6.1137	no	yes	no	hypothetical protein LOC100384176 (LOC100384176), mRNA	hypothetical protein LOC100384176	nucleus;transcription regulator activity;regulation of transcription	WD40_repeat_sg; Hira; WD40_repeat-like_dom; WD40_repeat; G-protein_beta_WD-40_rep_reg; Gprotein_B; WD40_repeat_CS	Eukaryota
2	GRMZM2G164580			5.8438	5.9857	7.6845	8.2534	10.0561	3.824	1.8383	4.7526	no	no	no	NA	NA	GTP binding;microtubule;microtubule-based process	PyrdxlP-dep_Trfase_major_dom; Tubulin_CS	Embryophyta
2	GRMZM2G126873			2.516	5.0688	4.6218	3.8495	6.5303	1.9684	2.3651	1.447	no	yes	yes	NA	NA	NA	NA	Eukaryota
2	GRMZM2G177894			2.5906	1.8811	3.9389	3.941	3.7119	0.8872	0.768	1.4277	no	no	no	NA	NA	NA	Pentatricopeptide_repeat	Embryophyta
2	GRMZM2G080851			0.6515	1.4153	1.5541	2.1309	2.2556	0.5378	0.3407	1.0079	no	yes	no	hypothetical protein LOC100192366 (LOC100192366), mRNA	hypothetical protein LOC100192366	protein kinase activity;protein serine/threonine kinase activity;protein binding;ATP binding;protein amino acid phosphorylation	LRR-contain_N2; Leu-rich_rpt; Se/Thr_prot_kinase-like_dom; Ser-Thr/Tyr-Pkinase; Kinase-like_dom; Leu-rich_rpt_typical-subtyp; Tyr_Pkinase_cat_dom; Ser/Thr_prot_kinase_dom; Protein_kinase_ATP_BS; Ser/Thr_prot_kinase_AS	Embryophyta
2	GRMZM2G069408			4.2544	6.1081	10.3713	11.892	11.7843	2.8324	2.7288	6.0129	no	no	no	NA	NA	nucleus;transcription regulator activity;regulation of transcription	HLH_DNA-bd; HLH_DNA-bd_dom	Tracheophyta
2	GRMZM2G150262			7.542	10.0241	12.0153	15.3734	15.7542	5.2119	3.8064	7.6544	no	yes	no	zinc finger C-x8-C-x5-C-x3-H type family protein (LOC100285144), mRNA	zinc finger C-x8-C-x5-C-x3-H type family protein	nucleic acid binding;zinc ion binding	Znf_CCCH	Tracheophyta
2	GRMZM2G126913			0.8995	1.2446	2.4194	3.5754	3.4211	0.7151	0.4751	0.9799	no	no	no	NA	NA	DNA binding;DNA-directed RNA polymerase activity;aminopeptidase activity;intracellular;transcription;proteolysis;DNA binding;DNA-directed RNA polymerase activity;aminopeptidase activity;intracellular;transcription;proteolysis	Peptidase_M17_C; RNA_pol_Rpb2_2	Eukaryota
2	AC211737.3_FG012			10.0644	9.0455	25.8678	24.0677	31.8089	4.268	1.3796	5.3591	yes	no	no	NA	NA	serine-type endopeptidase activity;proteolysis	Peptidase_S8/S53; Peptidase_S8/S53_AS	Eukaryota
2	GRMZM2G049159			9.1422	7.1279	10.65	9.8985	9.8845	5.2086	3.0646	6.5501	no	no	no	hypothetical protein LOC100216906 (LOC100216906), mRNA	hypothetical protein LOC100216906;hypothetical protein LOC100216906	NA	TF_GRAS	Magnoliophyta
2	GRMZM2G075906			1.2607	1.3632	2.8001	2.0557	2.7385	0.3597	0.2088	0.4493	no	no	no	hypothetical protein LOC100273718 (LOC100273718), mRNA	hypothetical protein LOC100273718	NA	NA	Eukaryota
2	GRMZM2G113056			3.5503	3.9445	11.6996	12.3692	10.9928	3.5333	2.032	4.6467	no	no	no	LON2 protein (LON2), mRNA	LON2 protein	nucleotide binding;ATP-dependent peptidase activity;serine-type endopeptidase activity;ATP binding;proteolysis;defense response;ATPase activity;nucleoside-triphosphatase activity;nucleotide binding;ATP-dependent peptidase activity;serine-type endopeptidase activity;ATP binding;proteolysis;defense response;ATPase activity;nucleoside-triphosphatase activity	Pept_S16_N; ATPase_AAA_core; ATPase_AAA-5; Pept_S16_C; Ribosomal_S5_D2-typ_fold; ATPase_AAA+_core; Peptidase_S16_C; Chaprnin_clpA/B; Disease_R; Peptidase_S16_AS; Pept_S16_lon	Eukaryota
2	GRMZM2G153611			3.6967	3.3814	4.5601	4.5235	5.0419	1.6892	1.1636	2.2653	no	no	no	NA	NA	protein binding;zinc ion binding	NA	Eukaryota
2	AC200209.1_FG001			0.4477	0.1782	0.3937	0.098	0.4941	0.0669	0.1859	0.1573	no	no	no	NA	NA	NA	NA	Zea mays
2	GRMZM2G556667			24.5699	32.8171	57.0478	48.7526	52.2781	22.6209	26.3647	11.8211	no	yes	yes	NA	NA	NA	NA	NA
2	AC206223.3_FG006			2.5562	4.3686	5.071	4.3016	6.244	3.8193	2.3673	3.0044	no	yes	yes	hypothetical protein LOC100280156 (LOC100280156), mRNA	hypothetical protein LOC100280156	protein kinase activity;protein serine/threonine kinase activity;ATP binding;protein amino acid phosphorylation	Ser-Thr/Tyr-Pkinase; Kinase-like_dom; Tyr_Pkinase_cat_dom; Ser/Thr_prot_kinase_dom	Eukaryota
2	GRMZM2G172787			2.5386	2.1587	9.7693	9.0621	11.8448	1.6137	0.4919	1.2308	no	yes	no	NA	NA	nucleic acid binding;DNA binding;DNA topoisomerase activity;DNA topoisomerase type I activity;chromosome;DNA metabolic process;DNA topological change	Toprim_domain; Topo_IA_cen; Topo_IA_core; Toprim_dom_subgr; Topo_IA_2; Topo_IA_DNA-bd	Eukaryota
2	GRMZM2G162082			0.4996	1.197	1.8549	1.8886	2.2983	0.4376	0.2718	0.6576	no	no	no	hypothetical protein LOC100383141 (LOC100383141), mRNA	hypothetical protein LOC100383141	NA	Pentatricopeptide_repeat	Embryophyta
2	GRMZM2G043291			0.4677	1.3723	3.854	4.5684	3.8015	1.4447	1.6729	3.3117	no	yes	yes	LOC100282747 (pco124824), mRNA	LOC100282747	glutathione transferase activity;cytoplasm;metabolic process;glutathione transferase activity;cytoplasm;metabolic process;glutathione transferase activity;cytoplasm;metabolic process;glutathione transferase activity;cytoplasm;metabolic process	NA	Eukaryota
2	GRMZM2G118467			26.2722	26.0254	37.2431	39.102	39.1466	22.7919	10.2418	20.559	no	no	no	LOC100279626 (gpm725), mRNA	LOC100279626;LOC100279626;LOC100279626	NA	Endo/exonuclease/phosphatase	Eukaryota
2	GRMZM2G136926			0.7295	0.7457	1.1673	1.3271	1.305	0.8778	0.409	0.703	no	no	no	NA	NA	NA	NA	NA
2	GRMZM2G069687			3.34	2.9039	9.3906	11.1778	14.1252	1.9129	1.0663	3.6152	no	yes	no	NA	NA	phosphopantetheine binding;phosphopantetheine binding	WH2_actin-bd; PPantetheine_attach_site	Embryophyta
2	GRMZM2G038388			1.3903	2.2074	1.9549	1.999	2.5417	2.0238	0.876	1.8578	no	no	no	hypothetical protein LOC100383222 (LOC100383222), mRNA	hypothetical protein LOC100383222	receptor activity;binding;ATP binding;apoptosis;defense response;cell adhesion;cell-matrix adhesion;integrin-mediated signaling pathway;integrin complex	NB-ARC; Leu-rich_rpt_typical-subtyp; Disease_R; Integrin_bsu	Magnoliophyta
2	GRMZM2G069095			15.0291	20.8322	28.5623	26.2443	23.0153	9.2668	10.1691	26.4575	no	no	no	vacuolar proton pump homolog1 (vpp1), mRNA	vacuolar proton pump homolog1	inorganic diphosphatase activity;hydrogen-translocating pyrophosphatase activity;proton transport;membrane;inorganic diphosphatase activity;hydrogen-translocating pyrophosphatase activity;proton transport;membrane	H_PPase	Eukaryota
2	GRMZM2G381822			6.0353	7.0045	19.2538	15.2191	19.0786	7.1275	3.4287	6.878	no	no	no	origin recognition complex subunit 3 (orc3), mRNA	origin recognition complex subunit 3	DNA binding;hormone activity;extracellular region;nuclear origin of replication recognition complex;DNA replication	ORC3_N; Gonadotropin_bsu_CS	Eukaryota
2	GRMZM2G115755			5.4225	7.4576	13.7025	12.4955	14.8348	4.2868	1.6953	4.3993	no	no	no	NA	NA	protein kinase activity;protein serine/threonine kinase activity;MAP kinase activity;ATP binding;protein amino acid phosphorylation	Se/Thr_prot_kinase-like_dom; Ser-Thr/Tyr-Pkinase; Kinase-like_dom; Tyr_Pkinase_cat_dom; Ser/Thr_prot_kinase_dom; Ser/Thr_prot_kinase_AS; Erk_3_4_MAPK	Eukaryota
2	GRMZM2G076987			3.7985	3.4999	7.9976	6.8803	6.7728	3.4907	2.3431	4.7517	no	no	no	receptor-like serine-threonine protein kinase (LOC100280895), mRNA	receptor-like serine-threonine protein kinase	protein kinase activity;protein serine/threonine kinase activity;ATP binding;protein amino acid phosphorylation	DUF26; Se/Thr_prot_kinase-like_dom; Ser-Thr/Tyr-Pkinase; Kinase-like_dom; Tyr_Pkinase_cat_dom; Ser/Thr_prot_kinase_dom; Protein_kinase_ATP_BS; Ser/Thr_prot_kinase_AS	Magnoliophyta
2	GRMZM2G039254			12.8204	9.9197	15.4765	19.6389	16.5878	6.8768	4.1031	9.2264	no	no	no	hypothetical protein LOC100381630 (LOC100381630), mRNA;hypothetical protein LOC100381630 (LOC100381630), mRNA;hypothetical protein LOC100381630 (LOC100381630), mRNA	NA	NA	Pentatricopeptide_repeat	Magnoliophyta
2	GRMZM2G018048			0.8848	0.468	3.0958	2.7636	3.1333	0.3797	0.1276	0.3815	no	no	no	NA	NA	DNA binding	Homeodomain-like; SANT_DNA-bd	Embryophyta
2	GRMZM2G012326			5.3682	8.5871	11.1087	10.4953	12.5586	4.2581	2.6351	5.7979	no	no	no	NA	NA	protein kinase activity;protein serine/threonine kinase activity;calcium ion binding;ATP binding;protein amino acid phosphorylation	Se/Thr_prot_kinase-like_dom; Ser-Thr/Tyr-Pkinase; EF-hand; Kinase-like_dom; Tyr_Pkinase_cat_dom; Ser/Thr_prot_kinase_dom; EF_hand_Ca-bd; EF_Hand_1_Ca_BS; Protein_kinase_ATP_BS; Ser/Thr_prot_kinase_AS	Embryophyta
2	GRMZM2G026309			5.6347	6.6174	11.9088	12.1176	11.2921	4.7604	3.111	7.4926	no	no	no	NA	NA	cysteine-type endopeptidase activity;binding;proteolysis;cysteine-type endopeptidase activity;binding;proteolysis	HEAT; ARM-type_fold; Pept_cys_AS	Embryophyta
2	GRMZM2G357804			13.3547	13.5425	43.8625	42.2379	49.425	7.378	4.5824	13.9358	no	yes	no	NA	NA	NA	TPR-1; TPR_2; Sel1-like; TPR_repeat	Eukaryota
2	AC202432.3_FG006			0.1684	0.178	0.6693	0.3974	1.3	0.1679	0.1088	0.0583	no	no	no	NA	NA	NA	NA	NA
2	GRMZM2G333579			4.0984	3.2257	5.7999	6.1017	5.8048	1.6495	1.1945	2.1023	no	no	no	NA	NA	NA	Rrm_2; Atrophin-1	Viridiplantae
2	GRMZM2G126858			3.2295	4.3367	8.323	6.1858	9.6433	3.6498	1.8639	2.9264	no	no	no	NA	NA	protein kinase activity;protein serine/threonine kinase activity;protein binding;ATP binding;protein amino acid phosphorylation;protein kinase activity;protein serine/threonine kinase activity;protein binding;ATP binding;protein amino acid phosphorylation	Leu-rich_rpt; Se/Thr_prot_kinase-like_dom; Ser-Thr/Tyr-Pkinase; Kinase-like_dom; Tyr_Pkinase_cat_dom; Ser/Thr_prot_kinase_dom; Protein_kinase_ATP_BS; Ser/Thr_prot_kinase_AS	Embryophyta
2	GRMZM2G050089			4.0873	5.1363	10.8399	10.7625	11.3431	4.0188	3.0352	6.4834	no	yes	yes	NA	NA	integral to membrane;transmembrane transport;integral to membrane;transmembrane transport	NA	Eukaryota
2	GRMZM2G013079			4.0336	10.107	14.1811	13.0309	13.7854	6.7246	5.0232	6.2674	no	yes	yes	hypothetical protein LOC100192632 (LOC100192632), mRNA	hypothetical protein LOC100192632	protein amino acid glycosylation;galactosyltransferase activity;membrane	Glyco_trans_31	Embryophyta
2	GRMZM2G181453			7.3065	8.7778	12.3722	12.7254	13.1913	7.7344	3.209	5.8973	no	no	no	RNA recognition motif family protein (LOC100282490), mRNA	RNA recognition motif family protein	nucleic acid binding;nucleic acid binding;nucleic acid binding;nucleic acid binding	RRM_RNP1; RNA-recognition_dom1	Eukaryota
2	GRMZM2G307567			0.4548	0.1701	1.0277	1.2493	1.9198	0.2744	0.0547	0.1936	no	no	no	NA	NA	ubiquitin ligase complex;actin binding;ubiquitin-protein ligase activity;actin cytoskeleton;protein ubiquitination;actin cytoskeleton organization	NA	Zea mays
2	GRMZM2G090086			1.1123	2.2865	3.0726	3.731	3.3344	2.2428	0.6643	2.4031	no	yes	no	NA	NA	protein binding;ATP binding;membrane;protein import	SecA_DEAD; SecA_preprotein_X-link_dom; DEAD-like_N	Eukaryota
2	GRMZM2G169990			3.3707	6.0266	5.2049	4.5177	6.5075	3.1548	1.7041	3.5785	no	no	no	hypothetical protein LOC100381797 (LOC100381797), mRNA;hypothetical protein LOC100381797 (LOC100381797), mRNA	hypothetical protein LOC100381797;hypothetical protein LOC100381797	NA	NA	Magnoliophyta
2	GRMZM2G331779			3.6488	3.5572	6.895	5.9721	7.2193	1.9125	0.8258	1.7176	no	no	no	hypothetical protein LOC100216998 (LOC100216998), mRNA	hypothetical protein LOC100216998	NA	Pentatricopeptide_repeat	Tracheophyta
2	GRMZM2G319167			3.8501	2.6055	15.6377	15.4165	17.6839	6.3991	2.3661	9.1234	no	no	no	NA	NA	DNA binding;ligand-dependent nuclear receptor activity;binding;nucleus;regulation of transcription, DNA-dependent	ARM-type_fold; NOR1_rcpt	Tracheophyta
2	GRMZM2G114789			1.5716	3.593	3.2491	3.1362	3.9214	2.391	2.4642	2.5206	no	yes	yes	LOC100274464 (TIDP3163), mRNA	LOC100274464	nucleic acid binding	RRM_RNP1	Embryophyta
2	GRMZM2G043056			15.5876	18.9304	37.3733	36.0868	39.6052	11.0844	6.9379	15.7369	no	yes	no	hypothetical protein LOC100280000 (LOC100280000), mRNA	hypothetical protein LOC100280000;hypothetical protein LOC100280000	ARF GTPase activator activity;zinc ion binding;regulation of ARF GTPase activity;ARF GTPase activator activity;zinc ion binding;regulation of ARF GTPase activity	ArfGAP	Eukaryota
2	GRMZM5G898887			0.6338	1.0321	2.0896	1.7734	2.2671	1.7828	0.788	1.5227	no	no	no	NA	NA	protein kinase activity;protein serine/threonine kinase activity;signal transducer activity;protein binding;ATP binding;protein amino acid phosphorylation;chemotaxis;signal transduction;protein secretion;membrane;protein kinase activity;protein serine/threonine kinase activity;ATP binding;protein amino acid phosphorylation	Ser-Thr/Tyr-Pkinase; Kinase-like_dom; Tyr_Pkinase_cat_dom; Ser/Thr_prot_kinase_dom; Ser/Thr_prot_kinase_AS	Tracheophyta
2	GRMZM5G830776			1.203	1.3189	2.4995	2.3274	2.7682	0.5595	0.6168	0.6186	no	no	no	NA	NA	vesicle docking involved in exocytosis;vesicle-mediated transport;vesicle docking involved in exocytosis;vesicle-mediated transport	Sec1-like	Eukaryota
2	GRMZM2G053713			1.8477	1.4453	3.7698	4.3795	5.695	0.6746	0.4735	1.1587	no	no	no	NA	NA	catalytic activity	PP2C_N; PP2C-related; Kinase-like_dom	Eukaryota
2	GRMZM2G058734			3.332	4.5868	4.6214	3.4923	5.0512	3.3056	1.7261	3.3602	no	no	no	hypothetical protein LOC100191491 (LOC100191491), mRNA	hypothetical protein LOC100191491	NA	NA	Embryophyta
2	GRMZM2G056145			14.7311	13.4465	25.1917	22.2327	23.6772	10.3941	5.2919	12.3542	no	no	no	hypothetical protein LOC100279216 (LOC100279216), mRNA	hypothetical protein LOC100279216	nucleic acid binding;zinc ion binding;homoiothermy;ice binding;response to freezing;homoiothermy;ice binding;response to freezing;homoiothermy;ice binding;response to freezing	Antifreeze_1	Viridiplantae
2	AC203754.4_FG008			1.9609	2.4782	6.1144	5.8919	8.346	1.2331	0.4133	1.3987	no	yes	no	NA	NA	glutamate 5-kinase activity;cytoplasm;cellular amino acid metabolic process;proline biosynthetic process;metabolic process;cellular amino acid biosynthetic process;oxidoreductase activity;oxidation reduction	Asp/Glu/Uridylate_kinase; Ald_DH/histidinol_DH; Glutamate_5-kinase_CS; Glu_5kinase; Asparaginase/glutaminase; ProB	Eukaryota
2	GRMZM2G137236			5.7362	7.6731	12.2411	15.9301	17.743	2.7691	2.3003	4.2542	no	yes	no	LOC100280063 (cl584_1b), mRNA	LOC100280063	binding;protein binding;intracellular protein transport;protein transporter activity;protein transport;membrane;vesicle-mediated transport;membrane coat;clathrin adaptor complex	Clathrin/coatomer_adapt-like_N; Clathrin_a/b/g-adaptin_app_Ig; Clathrin_a-adaptin_app_sub_C; ARM-type_fold; Clathrin/coatomer_app_Ig-like; Calthrin/coatomer_app_sub_C; AP2_complex_asu	Eukaryota
2	GRMZM2G177198			2.6766	2.6797	4.3272	4.6044	6.0477	1.9046	0.8341	1.7618	no	no	no	hypothetical protein LOC100384210 (LOC100384210), mRNA	hypothetical protein LOC100384210	NA	NA	Viridiplantae
2	GRMZM2G142030			4.4726	5.5762	10.2409	12.4941	14.6066	3.332	2.0577	4.4465	no	yes	no	LOC100285632 (pco130312), mRNA	LOC100285632	metabolic process;transaminase activity;biosynthetic process;transferase activity;transferase activity, transferring nitrogenous groups;pyridoxal phosphate binding	NA	Eukaryota
2	GRMZM2G019236			18.5596	16.7475	35.7581	36.8077	37.3241	9.5785	6.1776	15.1389	no	yes	no	hypothetical protein LOC100382471 (LOC100382471), mRNA	hypothetical protein LOC100382471;hypothetical protein LOC100382471	muscarinic acetylcholine receptor activity;protein binding;intracellular protein transport;ER to Golgi vesicle-mediated transport;G-protein coupled receptor protein signaling pathway;zinc ion binding;membrane;COPII vesicle coat;protein binding;intracellular protein transport;ER to Golgi vesicle-mediated transport;COPII vesicle coat;muscarinic acetylcholine receptor activity;protein binding;intrac…	Znf_Sec23_Sec24; Musac_M1_rcpt	Eukaryota
2	GRMZM2G010357			4.1562	5.021	14.0959	21.4274	20.5724	2.6135	2.2738	5.0053	yes	yes	yes	LOC100281429 (umc1463), mRNA	LOC100281429;LOC100281429	nucleus;transcription regulator activity;regulation of transcription;nucleus;transcription regulator activity;regulation of transcription;nucleus;transcription regulator activity;regulation of transcription;nucleus;transcription regulator activity;regulation of transcription	NOT	Eukaryota
2	GRMZM2G003022			6.1892	5.9422	13.5473	16.4913	18.3827	3.7429	2.2359	5.729	no	no	no	NA	NA	protein binding;intracellular protein transport;ER to Golgi vesicle-mediated transport;zinc ion binding;COPII vesicle coat	Znf_Sec23_Sec24; Sec23/24_trunk_dom; Sec23_24_beta_S; Sec23/24_helical_dom	Eukaryota
2	GRMZM2G089484			10.3998	13.6606	17.5958	19.0119	23.2737	5.3983	4.0629	8.5744	no	no	no	LOC542143 (mpk6), mRNA	LOC542143	protein kinase activity;protein serine/threonine kinase activity;MAP kinase activity;ATP binding;protein amino acid phosphorylation	Se/Thr_prot_kinase-like_dom; Ser-Thr/Tyr-Pkinase; Kinase-like_dom; Tyr_Pkinase_cat_dom; Ser/Thr_prot_kinase_dom; Protein_kinase_ATP_BS; MAP_kinase_CS; Erk_3_4_MAPK; JNK_MAPK	Viridiplantae
2	GRMZM2G061928			26.9551	42.3468	58.4955	64.2107	65.4384	44.3535	32.6042	28.8272	yes	yes	yes	inorganic pyrophosphatase (IPP), mRNA	inorganic pyrophosphatase;inorganic pyrophosphatase;inorganic pyrophosphatase	magnesium ion binding;inorganic diphosphatase activity;cytoplasm;phosphate metabolic process;magnesium ion binding;inorganic diphosphatase activity;cytoplasm;phosphate metabolic process;magnesium ion binding;inorganic diphosphatase activity;cytoplasm;phosphate metabolic process;magnesium ion binding;inorganic diphosphatase activity;cytoplasm;phosphate metabolic process	Pyrophosphatase	Eukaryota
2	GRMZM2G505380			1.4069	1.7992	3.5558	3.1514	3.4815	1.0566	0.8884	2.3456	no	no	no	NA	NA	NA	LipoPS_modifying	Eukaryota
2	GRMZM2G102167			4.1744	7.5322	14.3474	15.1223	14.056	8.2787	9.5375	9.8472	no	yes	yes	hypothetical protein LOC100193714 (LOC100193714), mRNA	hypothetical protein LOC100193714	NA	NA	Viridiplantae
2	AC209705.3_FG004			8.5401	6.7754	19.2776	19.4228	25.9809	5.6788	1.8609	6.209	no	no	no	NA	NA	NA	WD40_repeat_sg; WD40_repeat-like_dom; WD40_repeat; WD40_repeat_CS; G-protein_beta_WD-40_rep_reg	Tracheophyta
2	GRMZM5G829738			11.4598	14.6029	35.5994	27.0549	32.4884	5.9163	4.3475	9.5059	no	yes	no	NA	NA	NA	LsmAD_domain; LSM_related_domain	Eukaryota
2	GRMZM2G050309			5.6708	6.8262	8.8796	8.9986	10.8323	2.8232	2.5073	3.0351	no	no	no	NA	NA	ATP binding;phosphatidylinositol phosphate kinase activity;1-phosphatidylinositol-4-phosphate 5-kinase activity;phosphatidylinositol metabolic process	MORN; PInositol-4-P-5-kinase_core; PInositol-4P-5-kinase_core_sub; PIno-4-P-5_kinase_pln	Eukaryota
2	GRMZM2G120373			2.0299	2.2178	5.3128	6.1183	7.0438	1.0736	0.7766	1.7938	no	yes	no	hypothetical protein LOC100383723 (LOC100383723), mRNA	hypothetical protein LOC100383723	double-stranded RNA binding;intracellular	Ds-RNA-bd; NIF	Viridiplantae
2	GRMZM2G056934			3.3707	6.0302	5.1967	4.4003	6.3679	3.1843	1.6108	3.4434	no	no	no	hypothetical protein LOC100381797 (LOC100381797), mRNA;hypothetical protein LOC100381797 (LOC100381797), mRNA	hypothetical protein LOC100381797;hypothetical protein LOC100381797	NA	NA	Magnoliophyta
2	GRMZM2G089132			2.5065	3.6974	10.1851	11.3145	9.8168	5.7941	4.4463	7.1146	no	no	yes	hypothetical protein LOC100382664 (LOC100382664), mRNA	hypothetical protein LOC100382664	structural constituent of cytoskeleton	DUF547; SF_assemblin; Keratin_I	Eukaryota
2	GRMZM2G015592			4.5141	3.5719	7.2068	5.3599	6.8633	1.9906	1.2421	1.7783	no	no	no	NA	NA	nucleus	RED_N; RED_C	Eukaryota
2	GRMZM2G143646			2.442	2.2087	4.7397	4.2338	4.0373	1.9885	0.7728	1.8871	no	no	no	NA	NA	NA	Pentatricopeptide_repeat; Terpenoid_synth	Magnoliophyta
2	GRMZM5G861756			1.3323	1.7715	1.7692	1.6359	1.9045	0.9742	0.3449	0.6281	no	no	no	NA	NA	GTP binding	AIG1; Toc86_159	Eukaryota
2	GRMZM2G008369			1.553	1.8076	3.1275	3.5408	4.0832	1.8527	0.5312	1.1368	no	no	no	NA	NA	nucleotide binding;magnesium ion binding;GTPase activity;GTP binding;intracellular;nucleoside-triphosphatase activity	GTP1_OBG_sub; MMR_HSR1_GTP-bd; ATPase_AAA+_core; GTP1_OBG; GTP-bd_Obg/CgtA	Eukaryota
2	GRMZM2G377369			5.9148	5.0448	10.5153	12.4226	13.7771	2.6956	1.4882	3.5528	no	yes	no	NA	NA	DNA binding;nucleus	Methyl_CpG_DNA-bd; DNA-bd_integrase-typ	Magnoliophyta
2	GRMZM2G171163			0.461	0.6712	2.1258	2.5475	2.3924	0.6811	0.1851	0.8075	no	no	no	NA	NA	NA	TF_JmjN	Eukaryota
2	GRMZM2G160428			7.0245	7.3887	16.5442	14.2808	14.266	3.9195	3.1002	7.2541	no	no	no	NA	NA	protein kinase activity;protein serine/threonine kinase activity;ATP binding;protein amino acid phosphorylation;protein kinase activity;protein serine/threonine kinase activity;ATP binding;protein amino acid phosphorylation;protein kinase activity;protein serine/threonine kinase activity;ATP binding;protein amino acid phosphorylation	Se/Thr_prot_kinase-like_dom; Ser-Thr/Tyr-Pkinase; Kinase-like_dom; Tyr_Pkinase_cat_dom; Ser/Thr_prot_kinase_dom; Protein_kinase_ATP_BS; Ser/Thr_prot_kinase_AS	Eukaryota
2	GRMZM2G162177			1.8635	2.7263	3.6429	3.3279	3.7299	2.3854	1.0845	2.3451	no	yes	no	hypothetical protein LOC100191957 (LOC100191957), mRNA	hypothetical protein LOC100191957	DNA binding;ligand-dependent nuclear receptor activity;somatostatin receptor activity;nucleus;regulation of transcription, DNA-dependent;G-protein coupled receptor protein signaling pathway;integral to membrane	Somatstn_rcpt_5; NURR_rcpt	Tracheophyta
2	GRMZM2G005350			5.9174	6.9163	14.5131	16.777	15.7429	5.6869	3.5853	7.5993	no	yes	yes	NA	NA	actin binding;protein tyrosine phosphatase activity;sugar:hydrogen symporter activity;protein amino acid dephosphorylation;protein tyrosine/serine/threonine phosphatase activity;phosphoenolpyruvate-dependent sugar phosphotransferase system;dephosphorylation;phosphatase activity;actin binding;protein tyrosine phosphatase activity;sugar:hydrogen symporter activity;protein amino acid dephosphorylati…	Dual-sp_phosphatase_cat-dom; Dual-sp_phosphatase_subgr_cat; Tyr_Pase_cat; Gelsolin; Tyr_Pase_AS; PTS_HPr_Ser_P_site	Eukaryota
2	GRMZM2G021846			4.3928	4.7574	7.7539	6.9706	8.6863	2.7064	1.4456	3.6013	no	no	no	fructose-6-phosphate-2-kinase/fructose-2,6-bisphosphatase (LOC541911), mRNA	fructose-6-phosphate-2-kinase/fructose-2,6-bisphosphatase	catalytic activity;6-phosphofructo-2-kinase activity;ATP binding;fructose metabolic process;fructose 2,6-bisphosphate metabolic process;metabolic process;carbohydrate binding;catalytic activity;6-phosphofructo-2-kinase activity;ATP binding;fructose metabolic process;fructose 2,6-bisphosphate metabolic process;metabolic process;carbohydrate binding	6Phosfructo_kin; Carb-bd-like_fold; PG/BPGM_mutase_AS; Bifunct_6PFK/fruc_bisP_Ptase; 6Pfruct_kin	Eukaryota
2	GRMZM2G058128			3.8851	2.5858	8.2151	8.3015	10.1405	1.7261	1.4729	2.9258	no	no	no	NA	NA	hydrolase activity, hydrolyzing O-glycosyl compounds;carbohydrate metabolic process;hydrolase activity, hydrolyzing O-glycosyl compounds;carbohydrate metabolic process	CenC_carb-bd; Glyco_hydro_10; Glyco_hydro_catalytic_core; Galactose-bd-like	Embryophyta
[truncated: 14,809 more rows]
