# Supplementary material for: Regulatory modules controlling maize inflorescence architecture
Source: HighWire-hosted journal article supplement (doi:10.1101/gr.166397.113), 2013-12-04
Supplement: Supp_Table7.xlsx [file Supp_Table7.xlsx]

## Sheet: Table_S7
Supplemental Table 7. Genes in cluster 11 that are differentially expressed (DE) in 1mm ra3 mutants. Many genes in this set have been implicated in stress-response.
aFunctional annotations, if available, based on xref pipeline includes Refseq DNA, Unigene, Entrez Gene, Gene Ontology and InterPro. Annotations in brackets are based on Arabidopsis orthologs. bGene ids for closest Arabidopsis ortholog(s) are provided based on EnsemblCompara gene trees at Gramene. NA means close otholog is not found. cBox is checked if gene is DE in ra1, ra2 and/or ra3 mutant ear…
maize.gene.id	annotationa	arabidopsis.gene.id(s)b	DEc ra3	ln fcd	DE ra1	DE ra2
GRMZM2G036351	ZIM motif family protein; jasmonate-zim-domain protein	AT1G19180;AT1G74950;AT1G72450;AT1G17380	✓	4.0506	✓	✓
GRMZM2G124037	CBF3-like protein (CBF3); AP2-ERF family TF	AT1G12610;AT1G63030;AT4G25490;AT4G25480;AT4G25470;AT5G51990	✓	3.93618	✓	✓
GRMZM2G361210	C2H2 family TF; [RESPONSIVE TO HIGH LIGHT 41 (RHL41)]	AT5G59820;AT3G46070;AT3G46080;AT3G46090;AT3G53600;AT2G37430;AT2G28710	✓	3.44699	✓	✓
GRMZM2G065989	SPX domain gene	AT2G45130	✓	3.4216
GRMZM2G052100	Asr protein; abscisic stress ripening protein 1	NA	✓	3.29638
GRMZM5G801190	DUF241_pln	AT1G76240	✓	2.97178		✓
GRMZM2G069082	AP2-ERF family TF; [DREB family TF]	AT1G12610;AT1G63030;AT4G25490;AT4G25480;AT4G25470;AT5G51990	✓	2.877	✓	✓
GRMZM2G180044	Protein of unknown function (DUF607)	AT2G23790;AT4G36820;AT5G42610;AT5G66650	✓	2.80227
GRMZM2G025062	ERF-like protein	NA	✓	2.7755		✓
GRMZM2G137341	dehydration-responsive element-binding protein 1A; AP2-ERF family TF	AT1G12610;AT1G63030;AT4G25490;AT4G25480;AT4G25470;AT5G51990	✓	2.75721	✓	✓
GRMZM2G369472	AP2-ERF family TF	AT4G34410	✓	2.71449
GRMZM2G177050	CBL-interacting serine/threonine-protein kinase 11	AT2G30360;AT2G38490;AT5G01820	✓	2.63245	✓	✓
GRMZM2G104622	BON association protein 2 (BAP2)	AT2G45760;AT3G61190	✓	2.61656
GRMZM2G459663	EF hand family protein	AT3G29000;AT3G47480;AT5G39670	✓	2.61444
GRMZM2G124011	sbCBF6; AP2-ERF family TF	AT1G12610;AT1G63030;AT4G25490;AT4G25480;AT4G25470;AT5G51990	✓	2.59578
GRMZM2G449875	RING-H2 finger protein ATL2A	AT2G28920	✓	2.57742
GRMZM2G168115	aspartic-type endopeptidase/ pepsin A	AT4G35880	✓	2.57135
GRMZM2G323387		AT3G03280;AT5G17350	✓	2.54103	✓	✓
GRMZM2G015605		NA	✓	2.47279	✓
GRMZM2G069146	AP2-ERF family TF; [DREB family TF; DWARF AND DELAYED FLOWERING]	AT1G12610;AT1G63030;AT4G25490;AT4G25480;AT4G25470;AT5G51990	✓	2.41442		✓
GRMZM2G380377	DRE-binding protein 4 (DBP4); AP2-ERF family TF	AT1G12610;AT1G63030;AT4G25490;AT4G25480;AT4G25470;AT5G51990	✓	2.40402
GRMZM2G444819	[DUF584; AtS40-3]	AT1G29640;AT2G34340;AT5G45630;AT4G18980	✓	2.37284
GRMZM2G312661	calmodulin like protein	AT4G20780;AT5G44460	✓	2.30275	✓
GRMZM2G374074		NA	✓	2.29865	✓	✓
GRMZM2G173596	ZIM motif family protein; jasmonate-zim-domain protein	AT1G19180;AT1G74950;AT1G72450;AT1G17380	✓	2.25967
GRMZM2G059397	Member of TETRASPANIN family	AT2G23810;AT4G28050;AT4G30430	✓	2.24868	✓	✓
GRMZM2G361120	Calcium-dependent lipid-binding (CaLB domain) family protein	AT3G16510;AT4G15755;AT4G15740	✓	2.24488
GRMZM2G357631	PRAS-rich protein	AT3G21570	✓	2.18754		✓
GRMZM2G044537	RING zinc finger protein-like	AT1G63840;AT3G61460;AT5G41400;AT4G11360;AT4G11370	✓	2.1659	✓
GRMZM2G061626	ZFP16-2; C2H2 family TF	AT2G28710;AT2G37430;AT3G53600;AT3G46090;AT3G46080;AT3G46070;AT5G59820	✓	2.16346
GRMZM2G474755	polcalcin Jun o 2; EF-hand calcium binding	NA	✓	2.13574		✓
GRMZM2G037452		AT5G04080	✓	2.12617
GRMZM2G120922	[YELLOW STRIPE like]	AT1G65730;AT1G48370;AT3G17650;AT5G45450	✓	2.11673		✓
GRMZM2G096904		AT2G25460	✓	2.11658
GRMZM5G872578	F-box containing	NA	✓	2.06095
GRMZM2G007256	adhesive/proline-rich protein	NA	✓	2.06004
GRMZM2G095873	zinc finger (C3HC4-type RING finger) family protein	NA	✓	2.05423
GRMZM2G364748	glycosyl-hydrolase	NA	✓	2.0538	✓
GRMZM2G343317		NA	✓	2.04342		✓
GRMZM2G054807	DUF668	NA	✓	2.03409
GRMZM2G445634	ZIM motif family protein; jasmonate-zim-domain protein	AT1G19180;AT1G74950;AT1G72450;AT1G17380	✓	2.0335
GRMZM2G062673	calmodulin	AT1G05990;AT3G07490;AT2G43290;AT3G59440;AT4G12860;AT4G03290	✓	2.00424
GRMZM5G836174	Pyridoxal phosphate phosphatase-related protein; [phosphate starvation-induced gene]	AT1G17710;AT1G73010;AT4G29530	✓	2.00312	✓
GRMZM2G037189	[dehydration-induced protein (ERD15)]	AT2G41430;AT4G14270	✓	1.99313		✓
GRMZM2G104332		AT5G66780	✓	1.93558
GRMZM2G476477	mitogen-activated protein kinase kinase kinase	AT1G05100;AT2G32510;AT4G26890;AT5G55090	✓	1.91172
GRMZM2G021459		NA	✓	1.89892	✓
GRMZM5G813661		NA	✓	1.89617
GRMZM2G071307		NA	✓	1.87445
GRMZM2G014022	F-box family protein	AT2G27310;AT2G36090;AT3G44326	✓	1.86921
GRMZM2G144024		AT1G07500;AT5G02220	✓	1.85359
GRMZM2G057672		AT1G19020;AT3G48180	✓	1.85314
GRMZM2G066213	Protein of unknown function (DUF793)	AT1G18740;AT1G74450;AT1G43630	✓	1.84495
GRMZM2G401040	ATP synthase F1, delta subunit family protein	NA	✓	1.8444
GRMZM2G055446	UDP-Glycosyltransferase superfamily protein	AT3G21560;AT4G15480;AT4G15490;AT4G15500	✓	1.84062
GRMZM2G567897	zinc finger (C3HC4-type RING finger) family protein	AT2G39720;AT3G46620;AT5G59550	✓	1.83787		✓
GRMZM2G455122		NA	✓	1.83078	✓	✓
GRMZM2G414540	syntaxin 121	AT3G11820;AT3G52400	✓	1.82434
GRMZM2G378442	VQ motif-containing; calmodulin (CAM)-binding protein	AT3G56880;AT2G41010	✓	1.79841
GRMZM2G426046	Calcium-binding EF-hand family protein	AT1G76650;AT1G76640;AT3G01830;AT5G42380	✓	1.7853
GRMZM2G071100	EF hand family protein	NA	✓	1.78482		✓
GRMZM5G829946	PLC-like phosphodiesterases superfamily protein	AT3G02040;AT5G41080;AT5G43300	✓	1.76317
GRMZM5G819965		AT5G38700;AT4G02170	✓	1.75998
AC220927.3_FG001		NA	✓	1.75127
GRMZM2G007306		NA	✓	1.74053
GRMZM2G425004	Calcium-dependent lipid-binding (CaLB domain) family protein	AT3G16510;AT4G15755;AT4G15740	✓	1.72632
GRMZM2G459532	Pentatricopeptide repeat (PPR) superfamily protein	NA	✓	1.72299		✓
GRMZM2G404126			✓	1.71886		✓
GRMZM5G819464	P-loop containing nucleoside triphosphate hydrolases superfamily protein	AT2G46620	✓	1.70958
GRMZM5G847466	calmodulin	AT1G18530;AT3G25600	✓	1.67133
GRMZM2G006676		NA	✓	1.66571
AC225718.2_FG006	EF-hand Ca2+-binding protein CCD1	AT4G27280;AT5G54490	✓	1.65733	✓
GRMZM2G075496	OSBP(oxysterol binding protein)-related protein	AT4G25850;AT4G25860;AT5G57240	✓	1.65293
AC233899.1_FG005		NA	✓	1.64719
GRMZM2G025895	WRKY family TF	AT4G11070;AT4G23810;AT5G24110	✓	1.63563	✓	✓
GRMZM2G061408	WRKY family TF	AT4G11070;AT4G23810;AT5G24110	✓	1.63489	✓	✓
GRMZM2G072589	UDP-xylosyltransferase	AT4G02500;AT3G62720	✓	1.61987
GRMZM2G114036	Patatin/PhospholipaseA2-related	NA	✓	1.61642	✓	✓
GRMZM2G164591	AP2-ERF family TF	NA	✓	1.58684
GRMZM2G115357	IAA24 - auxin-responsive Aux/IAA family member	AT1G04240;AT3G23030;AT4G14560;AT5G43700	✓	1.57906	✓
GRMZM2G009406	Dof-type zinc finger DNA-binding family protein	AT1G29160;AT2G34140	✓	1.57042
GRMZM2G041809	Glutaredoxin family protein	AT3G28850;AT5G39865	✓	1.56089
GRMZM2G427729	Patatin/PhospholipaseA2-related	NA	✓	1.56053
GRMZM2G460617		NA	✓	1.54799
GRMZM2G117007	zinc finger (CCCH-type) family protein; [salt-inducible zinc finger 1]	AT2G40140;AT3G55980;AT5G58620	✓	1.53278	✓	✓
GRMZM2G091201	Homeodomain-like superfamily protein	AT3G10580;AT3G10585;AT3G10590;AT5G04760;AT4G09450;AT5G23650	✓	1.5218
GRMZM2G129189	endochitinase PR4	AT3G54420	✓	1.51356
GRMZM2G010061	[CTC-interacting domain 7]	AT2G26280	✓	1.5108
GRMZM5G883250	Protein of unknown function (DUF569)	AT1G59710;AT1G27100;AT1G69890;AT3G28630;AT3G01311	✓	1.49742
GRMZM2G026406	serine/threonine kinase-like protein; DUF26	AT3G22060;AT3G58310;AT3G21990;AT3G21960;AT2G31620;AT3G21940;AT3G22010;AT3G21980;AT3G22000;AT3G21910;AT3G21970;AT3G21945;AT3G22050;AT3G21930;AT3G21920;AT3G21900;AT3G22040;AT3G29040;AT3G22020;AT3G22030;AT3G29050;AT4G20670;AT4G20650;AT4G20630;AT4G20540;AT4G20530;AT4G20570;AT4G20590;AT4G20580;AT4G20640;AT4G20600;AT4G20620;AT4G20550;AT4G20610;AT4G20560;AT4G20680;AT4G20700;AT4G20520	✓	1.4972
GRMZM5G836977	Patatin/PhospholipaseA2-related	NA	✓	1.49029
GRMZM2G421946	B-box zinc finger family protein	NA	✓	1.48893
AC194158.3_FG005		NA	✓	1.48092	✓
GRMZM5G866334	Protein of unknown function (DUF1685)	AT1G05870;AT2G43340;AT2G31560	✓	1.47711
GRMZM2G151649	ARM repeat superfamily protein	AT3G01400;AT5G58680	✓	1.47646
GRMZM2G126749	Calmodulin binding protein-like	AT1G73805	✓	1.465	✓	✓
GRMZM2G136910	abscisic stress protein homolog (aba1)	NA	✓	1.45667
GRMZM2G552956		NA	✓	1.45524
GRMZM2G137321		NA	✓	1.45506
GRMZM2G146004	LEA-3 protein	NA	✓	1.44775	✓
GRMZM2G061487	AP2-ERF family TF; [DREB subfamily A-6]	AT1G36060;AT1G78080;AT1G22190;AT2G22200;AT4G39780;AT5G65130	✓	1.44081
GRMZM2G068826		NA	✓	1.4382
GRMZM2G105987	NHL25; Late embryogenesis abundant (LEA) hydroxyproline-rich glycoprotein family	AT1G65690;AT1G54540;AT5G36970	✓	1.43249
GRMZM2G027726	[Bax inhibitor-1 family protein]	AT4G17580;AT5G47120;AT5G47130	✓	1.42702
GRMZM2G002805	ZFP16-2; C2H2 family TF	AT2G28710;AT2G37430;AT3G53600;AT3G46090;AT3G46080;AT3G46070;AT5G59820	✓	1.42559
GRMZM2G051619	gibberellin 2-beta-dioxygenase	AT1G78440;AT1G30040;AT2G34555	✓	1.41396
GRMZM2G097900	calmodulin-related protein 2	AT1G18210;AT1G73630	✓	1.40462
GRMZM2G105522	Protein of unknown function (DUF506)	AT1G12030;AT1G62420;AT2G23790;AT4G36820;AT5G42610;AT5G66650	✓	1.38399
GRMZM2G080959		NA	✓	1.38376
GRMZM2G078723	lachrymatory factor synthase; Polyketide cyclase/dehydrase and lipid transport superfamily protein	AT2G25770;AT4G32870	✓	1.36671	✓
GRMZM2G008033		NA	✓	1.34941	✓
GRMZM2G030688	Protein of unknown function (DUF506)	AT3G25240;AT3G07350	✓	1.33222
GRMZM2G089995	ethylene-responsive transcription factor 4; AP2-ERF family TF	NA	✓	1.3277
GRMZM2G118951	Late embryogenesis abundant (LEA) hydroxyproline-rich glycoprotein family	AT1G17620;AT5G11890	✓	1.32541
GRMZM2G139522		AT3G50340;AT5G67020	✓	1.32286
GRMZM2G340807	polcalcin Jun o 2; EF-hand calcium binding	NA	✓	1.30633
GRMZM2G305280		NA	✓	1.30444
GRMZM2G146720	calmodulin-related protein	NA	✓	1.30023
GRMZM2G060940	2-oxoglutarate (2OG) and Fe(II)-dependent oxygenase superfamily protein	AT3G19000;AT3G19010	✓	1.29522
GRMZM2G340578	Sodium/calcium exchanger family protein	AT5G17850;AT5G17860	✓	1.28264
GRMZM2G364612	zinc finger (C3HC4-type RING finger) family protein	AT2G39720;AT3G46620;AT5G59550	✓	1.28241
GRMZM2G112377	inorganic phosphate transporter 3	NA	✓	1.26677
GRMZM2G306643	Protein of unknown function, DUF584	AT3G45210;AT2G28400;AT5G03230;AT5G60680	✓	1.26482	✓
GRMZM2G106133	high mobility group I/Y-2	AT1G14900	✓	1.26374
GRMZM2G051683	UDP-glucosyl transferase	AT3G16520	✓	1.25058
AC149475.2_FG007	Acyl-CoA N-acyltransferases (NAT) superfamily protein	AT2G39020;AT2G39030	✓	1.24785	✓
GRMZM2G425482	Protein of unknown function (DUF581)	AT1G74940;AT1G19200;AT5G20700	✓	1.24754
GRMZM2G393062		AT4G24110	✓	1.22677	✓
GRMZM2G174347	ethylene-responsive transcription factor 4; AP2-ERF family TF	AT1G28370;AT1G53170;AT3G15210	✓	1.21953
GRMZM2G052357	NAD-dependent epimerase/dehydratase family protein	NA	✓	1.21755
GRMZM2G323888		AT1G52720;AT3G15630	✓	1.20597
GRMZM2G305580			✓	1.20368
GRMZM5G864735	Histone H3.2	NA	✓	1.20335
GRMZM2G165679		NA	✓	1.1998
GRMZM2G411084	MFP1 attachment factor 1	AT1G47200;AT5G43070;AT5G27940	✓	1.18908	✓
GRMZM2G100456		NA	✓	1.18388
GRMZM2G438202	AP2-ERF family TF	NA	✓	1.18263
GRMZM2G146614	B-box zinc finger family protein	NA	✓	1.18242
GRMZM2G467370		AT2G31090	✓	1.18229
GRMZM2G464013		AT3G46890;AT5G05950	✓	1.17076	✓
GRMZM2G004878	high mobility group A protein	AT1G14900	✓	1.16233		✓
AC220927.3_FG007	[Phosphate-responsive 1 family protein; EXORDIUM (EXO)]	AT1G35140;AT4G08950;AT5G09440;AT5G64260	✓	1.1608
GRMZM2G479529		AT2G35290	✓	1.15405	✓
GRMZM2G009544	Histone H1/H5; HMGI/HMGY protein	NA	✓	1.14832	✓
AC209257.4_FG008	[prenylated RAB acceptor]	AT2G38360;AT3G56110;AT2G40380;AT5G05380;AT5G01640;AT5G07110;AT4G00005	✓	1.14154
GRMZM2G128219	gibberellin receptor GID1L2	AT1G47480;AT1G49650;AT2G03550;AT1G19190;AT1G49640;AT1G49660;AT3G48700;AT3G48690	✓	1.13195	✓
GRMZM2G132095	HMG14/HMG17 domain containing protein	AT1G52565;AT3G15760	✓	1.1267
GRMZM2G171501	50S ribosomal protein L12-2	AT4G37660	✓	1.1205
GRMZM2G096753	phosphoenolpyruvate carboxylase kinase 3 (PPCK3)	AT1G08650;AT3G04530	✓	1.1166	✓
GRMZM2G149683	WRKY family TF	NA	✓	1.10757
GRMZM2G059562	WRKY family TF; [ABA overly sensitive mutant 3]	AT1G66560;AT1G66600;AT1G80590;AT1G66550;AT2G40750;AT3G56400;AT5G01900;AT5G22570	✓	1.10753
GRMZM2G428179	RING-H2 finger protein ATL2K	AT2G42360;AT2G42350;AT2G34000	✓	1.10178
GRMZM2G087254	adenosine 5'-phosphosulfate reductase 2 (APRL2)	AT1G62180;AT4G04610;AT4G21990	✓	1.09201
GRMZM2G111987	HMG14/HMG17 domain containing protein	AT1G52565;AT3G15760	✓	1.09044
GRMZM2G045178	[dehydration-induced protein (ERD15)]	AT2G41430;AT4G14270	✓	1.08287
GRMZM5G845782	[dehydration-induced protein (ERD15)]	AT2G41430;AT4G14270	✓	1.08238
GRMZM2G138067	DUF567	AT1G80120;AT3G15810	✓	1.08069
GRMZM2G157247		AT4G22758	✓	1.07379	✓
GRMZM2G390889		NA	✓	1.07103	✓
GRMZM2G142179	AP2-ERF family TF	NA	✓	1.07093	✓
GRMZM2G128560	lysosphingolipid and lysophosphatidic acid receptor activity	AT1G79060;AT1G56020;AT3G12970	✓	1.06872	✓
GRMZM2G121868	arabinogalactan protein	AT1G35230;AT2G22470;AT4G40090;AT5G10430;AT4G09030;AT5G64310;AT5G65390	✓	1.06385	✓
GRMZM2G136750		AT1G49000;AT3G18560	✓	1.06343
GRMZM2G021369	AP2-ERF family TF; [DREB family TF]	AT1G44830;AT1G21910;AT1G77640	✓	1.0569
GRMZM2G083091	[Transmembrane proteins 14C]	AT1G50740;AT3G20510	✓	1.04722
GRMZM2G065538	AP2/B3 transcription factor family protein; [related to ABI3/VP1 1 (RAV1); RAV2]	AT1G13260;AT1G25560;AT1G68840;AT1G51120;AT1G50680;AT3G25730	✓	1.03348
GRMZM2G144936	serine-type endopeptidase inhibitor	AT4G01575;AT3G61980	✓	1.02268
GRMZM2G135367	Glutaredoxin family protein	AT5G58530	✓	1.01668	✓
GRMZM2G496319		NA	✓	0.998091
GRMZM2G468056	WRKY family TF; [ABA overly sensitive mutant 3]	AT1G66560;AT1G66600;AT1G80590;AT1G66550;AT2G40750;AT3G56400;AT5G01900;AT5G22570	✓	0.996645
GRMZM5G843302	glycerol 3-phosphate permease	AT1G30560;AT3G47420;AT4G25220	✓	0.987833
GRMZM2G120539	AMP binding protein	AT1G20560;AT2G17650;AT1G76290	✓	0.984502
GRMZM2G013463		AT1G07500;AT5G02220	✓	0.968608	✓
GRMZM2G137139		AT3G57785;AT2G42310	✓	0.962757	✓
GRMZM2G390013	voltage-gated potassium channel complex protein	AT1G07020;AT1G07025	✓	0.957453	✓
GRMZM2G056231	Histone_H2A	NA	✓	0.957208
GRMZM2G177934	chemocyanin; [plantacyanin (ARPN)]	AT2G02850	✓	0.956353	✓
GRMZM5G899512		NA	✓	0.950027
GRMZM2G159119	myb-like transcription factor family protein; [HYPERSENSITIVITY TO LOW PI-ELICITED PRIMARY ROOT SHORTENING 1 (HRS1)]	AT1G68670;AT1G25550;AT1G13300;AT3G25790	✓	0.938807	✓
GRMZM2G028266	serine-type endopeptidase inhibitor	AT4G01575;AT3G61980	✓	0.927964	✓
GRMZM2G141636	[high-affinity nickel-transport family protein]	AT2G16800;AT4G35080	✓	0.919517
GRMZM2G025222	Flavin-binding monooxygenase family protein; [YUCCA gene family]	AT5G11320;AT4G32540	✓	0.906323	✓
GRMZM2G045690	fb27; Protein of unknown function DUF106	AT3G12030;AT5G06660	✓	0.900029
GRMZM2G410728	DUF241	AT1G76240	✓	0.899552	✓
AC189750.4_FG004	adenosine 5'-phosphosulfate reductase-like1 (aprl1)	AT1G62180;AT4G04610;AT4G21990	✓	0.898023
GRMZM2G075227	senescence-associated protein; [redox responsive transcription factor 1 (RRTF1)]	AT1G70780;AT1G23150;AT5G37730	✓	0.897171
GRMZM5G828488	ids4-like protein; SPX domain gene	AT2G45130	✓	0.895659	✓
AC234157.1_FG003		AT1G76600;AT1G21010;AT3G50800;AT2G23690;AT4G37240;AT5G66580	✓	0.895222
GRMZM2G009009		NA	✓	0.883476
GRMZM2G180668	WRKY family TF	AT1G28280;AT3G15300;AT2G33780;AT5G53830	✓	0.871649	✓
GRMZM2G450069		AT5G42330	✓	0.85851	✓
GRMZM2G079949	alpha/beta-Hydrolases superfamily protein	AT1G47480;AT1G49650;AT2G03550;AT1G19190;AT1G49640;AT1G49660;AT3G48700;AT3G48690	✓	0.851922	✓
GRMZM2G397684	RING/U-box superfamily protein	AT1G63840;AT3G61460;AT5G41400;AT4G11360;AT4G11370	✓	0.838466
GRMZM2G018806		AT2G01300;AT1G15010	✓	0.824491
GRMZM2G127478	serine-type endopeptidase	NA	✓	0.823907	✓
GRMZM2G100114	protein kinase APK1B	AT3G57120	✓	0.823263	✓
GRMZM2G320827	[Alcohol dehydrogenase transcription factor Myb/SANT-like family protein]	AT2G44730	✓	0.820982	✓
GRMZM2G075974		NA	✓	0.787769
GRMZM2G154578	[ARF family TF; Auxin-Induced in Root cultures 12 (AIR12)]	AT3G07390	✓	0.780361	✓
GRMZM2G077760	translocase inner membrane subunit	AT1G72750;AT1G17530	✓	0.778189	✓
GRMZM2G044771		NA	✓	0.77105	✓
GRMZM2G018820	PLC-like phosphodiesterases superfamily protein	AT3G02040;AT5G41080;AT5G43300	✓	0.769499
GRMZM2G155776		AT2G25720	✓	0.758801
GRMZM2G059845	secondary cell wall-related glycosyltransferase family 47	NA	✓	0.752992
GRMZM2G148561	WRKY25	NA	✓	0.747259	✓
GRMZM2G047590	peptidylprolyl cis/trans isomerase	AT2G18040	✓	0.74433
GRMZM2G106819	[OXIDATIVE STRESS 3 (OXS3)]	AT4G26288;AT5G56550	✓	0.738089
GRMZM2G334165	serine/threonine kinase	AT1G70740	✓	0.731588
GRMZM2G104070	ribose-5-phosphate isomerase	AT2G01290;AT1G71100	✓	0.724162	✓
GRMZM2G378770	60S acidic ribosomal protein P3	AT4G25890;AT5G57290	✓	0.719334	✓
GRMZM2G130079	Histone H3.2	AT5G10390	✓	0.709292	✓	✓
GRMZM2G171423	SPX domain protein	AT2G26660;AT5G20150	✓	0.704297
GRMZM2G042602		NA	✓	0.7024	✓
GRMZM2G149178	histone H4 (H4C14)	AT1G07660	✓	0.696532	✓
AC212565.3_FG001	histone H4	NA	✓	0.69398
GRMZM2G119071	histone2b2 (his2b2)	AT1G07790;AT3G46030;AT2G28720;AT3G45980;AT3G53650;AT2G37470;AT3G09480;AT5G22880;AT5G02570;AT5G59910	✓	0.670331	✓	✓
GRMZM2G170338	defense-related protein	NA	✓	0.648654	✓
GRMZM2G003306	histone	NA	✓	0.633394	✓	✓
GRMZM2G148646	Ribosomal protein L2 family	AT3G51190	✓	0.63296
GRMZM2G324643	Calcium-binding EF-hand family protein	AT1G12310;AT1G62820	✓	0.631171
GRMZM2G181153	histone H4	NA	✓	0.62986
GRMZM2G068590	inhibitor of apoptosis-like protein;SBP (S-ribonuclease binding protein) family protein	AT4G35070	✓	0.615352	✓
GRMZM2G477236	lil3 protein; neutral invertase	NA	✓	0.612074
GRMZM2G016232	histone H4	AT3G53730	✓	0.600313
GRMZM2G305046	histone2A1 (his2a1)	NA	✓	0.567326	✓	✓
GRMZM2G153648		AT1G28395;AT2G33847;AT2G20585	✓	0.427466	✓
GRMZM5G873455		NA	✓	0.252684	✓	✓
GRMZM2G317450	bHLH family TF; [BIM1; BES1-interacting Myc-like protein]	AT1G69010;AT5G08130;AT5G38860	✓	1.79769e+308	✓
GRMZM5G815553	photosystem I iron-sulfur center; [PsaC subunit of photosystem I]	ATCG01060	✓	1.79769e+308
GRMZM2G458087	heat shock protein binding; Chaperone DnaJ-domain superfamily protein	AT3G12170;AT5G06910	✓	1.79769e+308		✓
GRMZM2G348855	F-box domain containing protein	AT2G27310;AT2G36090;AT3G44326	✓	1.79769e+308
AC226221.2_FG011	Glutaredoxin; [CAX interacting protein 1]	AT3G54900	✓	1.79769e+308
GRMZM2G475536		AT1G23110;AT1G70900	✓	1.79769e+308
GRMZM2G309950		AT3G12650	✓	1.79769e+308
GRMZM2G073377	anther-specific protein 3 (nthr3);YY1 protein;Bifunctional inhibitor/lipid-transfer protein/seed storage 2S albumin superfamily protein	AT5G07230;AT5G52160;AT5G62080	✓	1.79769e+308
GRMZM2G362857	polcalcin Jun o 2; EF-hand calcium binding	NA	✓	1.79769e+308
GRMZM2G366910		NA	✓	1.79769e+308
AC177946.2_FG004	phosphopyruvate hydratase complex protein	NA	✓	-1.79769e+308	✓	✓
GRMZM2G176209	NOD26-like membrane intrinsic protein3 (nip3a)	AT4G10380	✓	-0.500614	✓
GRMZM2G455642	[endo-1,4-beta-glucanase]	AT1G70710;AT1G23210	✓	-0.55018	✓	✓
GRMZM2G037386	cAMP-dependent, cGMP-dependent and protein kinase C family protein; [PINOID2 (PID2)]	AT2G26700	✓	-0.602018	✓
GRMZM2G109140	ubiquitin-protein ligase; [F-BOX WITH WD-40 2]	AT4G08980	✓	-0.699626	✓	✓
GRMZM2G116185	[Serine/threonine-protein kinase WNK (With No Lysine)-related]	AT1G60060	✓	-0.73511	✓	✓
GRMZM2G090010	aminopeptidase	NA	✓	-1.00223	✓	✓
GRMZM2G113257	bHLH family TF	NA	✓	-1.01284	✓
GRMZM2G063747		AT1G47410;AT3G03280;AT5G17350	✓	-1.17442
GRMZM5G817764	AT hook like protein	NA	✓	-1.22513	✓	✓
GRMZM2G336902	Pentatricopeptide repeat (PPR) superfamily protein	AT1G47580	✓	-1.23361	✓	✓
GRMZM2G173483	Calcium-binding EF hand family protein	AT4G27790	✓	-1.44006	✓
GRMZM2G420758	disease resistance response protein 206	NA	✓	-1.50396
GRMZM5G838196	[NDH-dependent cyclic electron flow 1 (NDF1)]	AT1G15980	✓	-2.05162
GRMZM2G549348		NA	✓	-2.0719	✓	✓
GRMZM2G077219		AT3G13898	✓	-2.57294	✓
GRMZM2G326980		NA	✓	-2.61243
GRMZM2G087582	HATC domain containing	NA	✓	-4.63697
