# Supplementary material for: Regulatory modules controlling maize inflorescence architecture
Source: HighWire-hosted journal article supplement (doi:10.1101/gr.166397.113), 2013-12-04
Supplement: Supp_Table9.xlsx [file Supp_Table9.xlsx]

## Sheet: SM co-expression_clusters
Supplemental Table 9. K-means clusters based on expression profiles during normal Spikelet Meristem (SM) initiation and the 1mm to 2mm transition in wild-type, ra1 and ra2 mutant ears.
a 22,745 dynamically expressed genes clustered using mfuzz across IM/SPM and SM ear tissues and 1mm to 2mm developmental stages in wild-type, ra1 and ra2 mutant ears. b Gene names and abbreviations for maize genes that have been previously characterized (e.g. classical maize genes). c FPKM from Cuffdiff analysis used for clustering. d Yes or no is noted if gene is differentially in ra1, ra2 and/o…
				fpkmc								DE genesd
clustera	maize.gene.id	classical.maize.geneb		IM/SPM	SM	wt.1mm	wt.2mm	ra1.1mm	ra1.2mm	ra2.1mm	ra2.2mm	ra1	ra2	ra3
1	GRMZM2G337229	ole1	oleosin1	0.1574	0.2065	0.8975	1.5908	1.3844	0.1588	0.6497	0.5918	yes	no	no
1	GRMZM2G090122			6.6773	7.3627	6.4763	10.4976	3.9131	2.5305	8.0559	3.882	yes	no	no
1	AC209987.4_FG010			0.1257	0.3505	0	1.0433	0.1279	0.0109	0.2085	0.2378	yes	no	no
1	GRMZM2G057247			1.1366	1.7309	1.463	3.3515	1.0438	0.9224	2.3013	1.1345	yes	yes	no
1	GRMZM2G123394			1.8196	1.9195	3.2516	14.7266	11.1312	0.9221	11.6537	2.0031	yes	yes	no
1	GRMZM2G174975			5.9979	4.9126	13.4089	21.4174	5.58	4.9951	18.4094	8.6909	yes	yes	no
1	GRMZM2G100475			3.5616	3.751	5.6598	7.131	1.8029	3.3478	4.4646	5.5231	no	no	no
1	GRMZM2G176063			6.5077	8.0619	11.3571	15.6555	4.8739	3.1482	12.1859	6.7973	yes	no	no
1	GRMZM2G334105			0.1878	0.3373	0.599	0.7599	0.21	0.3244	0.1551	0.4285	no	no	no
1	GRMZM2G164912			2.0206	2.6173	1.6637	3.3504	2.027	1.4023	3.5521	2.2793	no	no	no
1	GRMZM2G003426			0.5608	0.8063	1.2335	1.8018	0.6844	0.4453	0.4652	0.5662	no	no	no
1	GRMZM2G055446			0.1642	0.0562	0.1579	0.8952	0.3045	0.2207	0.3235	0.0457	no	yes	no
1	GRMZM2G090744			16.3787	9.8329	30.249	35.223	15.3675	17.6011	22.9486	21.7015	no	no	no
1	GRMZM2G086294	zp15	zein protein	1.281	0.3238	3.222	4.0889	1.9612	1.8387	2.3294	1.9256	no	no	no
1	GRMZM2G016232			1247.2	1178.66	1039.39	1638.98	770.183	809.881	893.064	753.955	yes	no	no
1	GRMZM2G316007			0.0521	0.6947	0.0573	1.7661	0.0627	0.2233	0.0745	1.0285	yes	no	no
1	GRMZM2G176394			0.4492	0.9379	2.5005	4.5993	1.5424	0.5418	2.8188	1.4119	yes	yes	no
1	AC217978.3_FG001			0.1869	0.2655	0.9561	1.392	0.3424	0.0162	0.7197	0.1371	yes	yes	no
1	GRMZM2G093632			0.2453	0.9217	0.4523	1.0573	0.0727	0.1384	0.5198	0.308	no	no	no
1	GRMZM2G073044			9.6971	13.1298	12.8986	25.6486	6.2116	3.5259	25.8027	4.8549	yes	yes	no
1	GRMZM2G170969			350.357	97.1759	235.112	464.918	129.456	214.593	284.86	281.658	no	no	no
1	GRMZM2G306376			1.9803	1.943	3.9706	5.6509	2.2108	1.2791	2.8824	1.687	yes	yes	no
1	GRMZM2G163283			0	0	0.3759	6.9522	0.1952	0.0955	0.1784	0.2868	yes	yes	yes
1	GRMZM2G086587			3.1631	6.446	3.7285	7.6517	1.5394	0.8212	3.5096	1.8118	yes	yes	yes
1	GRMZM2G325038			3.6554	4.0881	5.5094	10.1977	3.2541	5.0101	8.0822	4.2712	no	no	no
1	GRMZM2G177915			27.922	6.9357	40.8554	49.9692	13.6094	14.7985	44.2143	16.1982	yes	yes	no
1	GRMZM2G101245			1.6905	0.9888	1.5435	6.5166	6.5474	0.7818	3.2801	1.1977	yes	yes	no
1	GRMZM2G451394			0.1771	0.4179	0.5003	0.7657	0.2739	0.2315	0.1256	0.4076	no	no	no
1	GRMZM2G043584			246.681	259.932	132.229	332.581	121.598	186.755	193.81	237.498	yes	no	yes
1	GRMZM2G157505			1.4668	0.9103	4.0535	5.1226	4.1719	3.8231	4.5797	1.8403	no	no	no
1	GRMZM2G095873			1.2291	0.8	1.5003	4.0265	0.7881	0.1023	1.6698	0.1405	yes	yes	no
1	GRMZM2G091320			1.4551	2.1147	3.9796	5.3299	1.4899	0.8255	3.5794	1.3719	yes	yes	no
1	GRMZM2G176841			0.1516	0.0623	0	0.2315	0.1585	0.0276	0	0.1038	yes	no	no
1	GRMZM2G433433			13.9428	9.0185	12.693	17.403	7.2051	11.1416	11.9912	10.1901	no	no	no
1	GRMZM2G135617			2.0494	2.4099	3.1925	5.5615	1.9683	2.3803	3.0889	2.3674	no	no	no
1	GRMZM2G097511			0.3083	0.266	0.6225	0.7054	0.2806	0.4026	0.3835	0.1575	no	no	no
1	GRMZM2G012724			6.2511	2.3417	5.7646	15.2436	8.0397	0.5379	10.2405	1.1162	yes	yes	no
1	GRMZM2G059799			3.9888	5.4492	6.5129	9.372	4.0374	4.5853	5.3905	4.3944	no	no	no
1	GRMZM2G143723			10.5102	7.4197	9.4636	20.4176	5.0357	6.7006	9.2831	11.027	yes	no	no
1	GRMZM2G330719			0.5803	0.2995	3.2816	4.1856	0.0489	0.0169	0.5349	0.272	yes	yes	no
1	AC187279.3_FG003			0.7323	0.8043	0.4006	1.1434	1.2597	0.1825	0.7489	0.5383	no	no	no
1	GRMZM2G018649			4.2683	7.0442	7.2077	8.7762	7.021	2.7698	6.6163	5.0794	yes	no	no
1	GRMZM2G380377			0.276	0.1256	0.6317	1.0278	0.7042	0.1532	0.9355	0.0396	yes	yes	yes
1	GRMZM2G117193			15.3132	29.9962	27.705	36.2633	14.2638	7.8269	22.6144	12.4042	yes	yes	no
1	GRMZM2G051571			0.2678	0.2569	0.1734	8.3774	1.1213	0.3679	0.863	0.0275	yes	yes	no
1	GRMZM5G822180			13.5411	9.0319	25.6528	30.3127	9.6313	5.5714	20.4322	10.873	yes	yes	no
1	AC183950.2_FG004			0.0336	0.1216	0	0.3767	0	0.0892	0	0.1437	no	no	no
1	GRMZM2G042179			22.0946	23.7272	25.3334	37.8418	32.0197	13.0548	34.8841	20.8743	yes	no	no
1	GRMZM2G355381			0.3708	0.3067	0.3702	0.7262	0.2639	0.2606	0.4849	0.1823	no	no	no
1	GRMZM2G171408			3.4955	5.9129	8.7862	11.5461	4.8034	1.6945	8.7626	2.9063	yes	yes	yes
1	GRMZM2G039968			0.7197	8.2491	7.541	9.309	3.3793	4.6556	8.5372	4.8615	no	no	no
1	AC204437.3_FG004			0.0154	0	0.1233	0.1852	0	0	0	0	yes	no	no
1	GRMZM2G142999			0.9794	1.0834	1.174	1.4134	0.6142	0.3252	0.6756	0.2833	yes	yes	no
1	AC210013.4_FG002			0	1.5913	0	3.5249	0.0466	0.9075	0.2045	1.0317	no	no	no
1	GRMZM2G700021			1.0487	0.9204	1.5894	2.0348	0.6559	0.4146	1.878	0.667	no	no	no
1	GRMZM2G347762			0.7223	0.5011	0.3297	0.9475	0.1592	0.1371	0.1893	0.1612	no	no	no
1	AC217887.3_FG004			1.5714	1.788	2.0385	4.3281	0.8842	0.5618	1.2651	1.5731	yes	no	no
1	GRMZM2G383920			0	0	0	0.0551	0	0	0	0	yes	yes	no
1	GRMZM2G025646			6.246	8.4994	7.359	12.3321	3.4397	5.555	8.0326	6.8888	no	no	no
1	GRMZM2G052869			2176.16	2320.44	1789.28	4193.22	1330.42	1847.82	1525.47	2182.9	yes	yes	yes
1	GRMZM2G119970			0.8627	0.4065	2.2855	4.0461	2.2188	0.7438	1.1408	1.097	yes	yes	no
1	GRMZM2G362410			0.5354	0.2353	0.679	0.8789	0.2631	0.2382	0.2893	0.2199	no	no	no
1	GRMZM2G090584			1.018	0.1853	0.0976	1.6527	0.259	0.0407	0.3716	0.0249	yes	yes	no
1	GRMZM2G064193			2.6999	4.696	3.1026	6.175	1.8835	1.6016	5.508	2.8646	yes	no	no
1	GRMZM2G136494			5.6192	10.8051	9.2566	16.9194	6.4325	5.3364	5.3904	5.6079	yes	yes	no
1	GRMZM2G101350			1.3768	1.1204	1.7674	3.5367	1.2305	0.9832	1.7954	0.5949	yes	yes	no
1	GRMZM2G122357			0.4839	0.9078	0.4968	2.7738	0.2373	0.1261	0.2798	0.1168	yes	yes	no
1	GRMZM5G843302			7.5609	6.951	6.0724	26.7076	5.8977	6.9765	10.4642	12.4337	yes	no	no
1	GRMZM2G008740			0.2068	1.0639	0.4061	1.6301	0.58	0.1034	1.2146	0.2455	yes	yes	no
1	GRMZM5G843748			45.2957	53.1694	55.0993	67.7245	38.5222	24.0915	51.0237	32.5667	no	no	no
1	GRMZM2G163535			0.2008	0	0.1161	0.2796	0.2905	0.1266	0.2514	0.0239	no	no	no
1	GRMZM2G045883			10.967	22.0127	26.8596	34.0427	6.3758	3.5128	27.4251	13.1152	yes	no	no
1	GRMZM2G164378			0.5187	1.0375	1.1088	1.4638	0.877	0.4548	1.3429	0.523	yes	no	no
1	AC211749.4_FG007			0	0	0	0.1927	0	0	0	0	yes	yes	yes
1	GRMZM2G050512			2.454	3.1807	2.7647	8.4516	4.1722	2.3886	6.239	4.0922	yes	no	no
1	AC196043.3_FG005			0.3199	2.0435	1.0262	2.4527	0.316	0.577	0.2125	1.2328	no	no	no
1	AC200753.3_FG003			0	0.2405	0.0769	0.273	0.0322	0.0348	0.106	0.0949	no	no	no
1	GRMZM2G409771			0.9316	1.6914	1.2554	4.6728	1.4134	2.2807	1.9517	3.0007	no	no	yes
1	GRMZM2G114998			4.5797	8.585	11.2836	12.474	4.9411	4.6331	11.7253	7.7389	no	no	no
1	GRMZM2G070092			0.1918	0.3067	0.3071	1.4269	0.3584	0.0718	0.4786	0.1016	yes	yes	no
1	GRMZM2G127457			0.1384	0.3554	0.5982	0.5862	0.1465	0.1676	0.1347	0.557	no	no	no
1	GRMZM2G057672			0.2091	0.463	1.9897	7.9665	2.4523	0.4586	3.3736	0.8152	yes	yes	no
1	AC194912.3_FG003			0.2418	0.5055	8.4463	12.8249	4.1062	4.3278	7.6978	5.6683	yes	no	no
1	GRMZM2G029455			4.1417	2.5275	5.298	7.6428	2.0507	2.0509	2.2118	3.7373	yes	no	no
1	GRMZM2G104332			0.883	0.0997	0.2611	1.3471	0.5137	0.1648	1.5093	0.1085	no	no	no
1	GRMZM2G015767			4.106	9.2035	4.3732	11.5264	4.3423	6.5019	4.8538	7.0185	no	no	no
1	AC205471.4_FG003			0.7777	0.7688	1.0557	2.413	1.1961	1.4542	1.0647	1.2114	no	no	no
1	GRMZM2G402564			20.8501	8.8238	8.8746	53.1042	7.8804	0.5344	4.6833	14.665	yes	yes	yes
1	AC197705.4_FG004			1.1026	4.0983	4.3984	5.7374	0.659	0.2437	3.1952	0.7234	yes	yes	yes
1	GRMZM2G368498			0.4673	1.0154	1.4562	2.2005	1.4958	1.0704	0.7429	1.289	no	no	no
1	GRMZM2G414620			0.11	0.1798	0.091	0.5055	0	0	0.1244	0.2949	no	no	no
1	GRMZM2G133978			0.4297	0.4421	0.6929	1.2449	0.3081	0.1823	0.5089	0.1452	no	no	no
1	GRMZM2G432060			4.1965	1.9069	10.7231	23.6911	12.337	0.8371	17.0415	2.8715	yes	yes	yes
1	GRMZM2G159996			4.8385	7.1274	11.0448	12.8309	6.2673	2.8285	8.6071	4.3641	yes	yes	yes
1	GRMZM2G359779			10.4289	15.4302	13.6322	18.4076	9.2973	4.4703	13.6719	8.57	yes	no	no
1	GRMZM2G005040			2.8585	1.4276	2.5282	4.6188	1.8667	3.1854	3.0906	2.4674	no	no	no
1	GRMZM2G104299			0.2969	0.1348	0.5133	1.4914	0.146	0.1236	0.5847	0.2675	no	no	no
1	GRMZM2G065498			0.2952	0	0	0.5253	0.1269	0.1077	0	0	no	no	no
1	GRMZM2G032160			14.5509	12.1464	11.7952	21.652	10.22	2.3943	18.5374	8.4801	yes	no	no
1	GRMZM2G374575			0.824	0.3708	0.5478	2.6651	0.6127	1.1823	1.9119	0.9437	no	no	no
1	GRMZM5G837872			11.252	10.3929	12.3125	21.3116	7.431	7.7843	18.8134	7.8748	no	no	no
1	GRMZM2G176352			1.6387	1.8951	0.8306	2.873	0.7406	0.8104	0.9896	1.2111	no	no	no
1	GRMZM2G080698			5.7514	4.8991	12.0395	16.7993	6.9837	5.4731	9.5152	6.343	yes	yes	no
1	GRMZM2G317426			1.3751	0.9064	0.6354	4.2115	3.2973	1.5328	2.0045	0.4069	no	no	no
1	AC233865.1_FG003			0.7509	1.5937	0.227	2.6984	0.2927	1.3012	0.9997	0.9135	no	no	no
1	GRMZM2G029101			0.6552	0.8313	1.5527	2.2184	0.3071	0.3611	1.4389	0.6657	yes	no	no
1	GRMZM2G034563			1.4551	3.7439	1.3435	6.0336	1.1024	1.2998	3.6362	2.2928	yes	no	no
1	GRMZM2G417954			0.2514	0.1093	0.4038	2.9713	1.9703	0.0346	1.0892	0.01	yes	yes	no
1	GRMZM2G171559			1.3404	5.1442	8.7834	17.3625	5.8859	10.3484	10.3692	7.4901	no	no	no
1	GRMZM2G171852			6.0945	10.3694	9.052	14.7749	5.6291	7.3319	11.1428	10.4663	no	no	no
1	GRMZM2G361164			0.1156	0.0742	0.2416	0.3378	0.1547	0.1005	0.137	0.0122	no	no	no
1	GRMZM2G070375			3.4468	3.9387	10.8227	12.8867	3.8955	4.8788	6.1182	6.6104	no	no	no
1	GRMZM5G856583			0.3205	0.7439	0.5851	1.8519	0.8949	0.4376	0.3866	0.359	no	no	no
1	GRMZM2G058398			0.2669	0.152	0.0746	0.4069	0.1338	0.1314	0.1822	0.2125	no	no	no
1	GRMZM2G014716			1.1257	0.6864	0.5455	1.5968	0.4242	0.3211	0.4621	0.3149	yes	yes	no
1	GRMZM2G082087			21.8439	23.359	33.7983	44.1409	21.62	19.1143	23.6318	23.7837	yes	no	no
1	GRMZM2G022979			0.6166	0.4287	0.8518	1.1511	0.3279	0.3854	0.6055	0.7732	no	no	no
1	AC211178.3_FG004			0	0	0	0.02	0	0	0	0	yes	yes	no
1	GRMZM2G017636			2.5386	3.9481	3.2626	4.7134	1.0727	0.4853	2.1997	1.0614	yes	yes	no
1	GRMZM2G080516			1.0472	1.011	1.2708	2.5731	0.8683	0.7602	2.3939	0.5516	yes	yes	no
1	GRMZM2G150962			11.7167	10.7554	15.0466	18.7156	7.5764	4.3365	15.3452	7.2345	yes	yes	no
1	GRMZM2G079632			4.4979	3.2304	5.0792	8.623	3.3533	2.2966	6.3929	2.1133	yes	yes	no
1	GRMZM2G073913			0.417	0.4276	0.4728	0.7755	0.2338	0.275	0.6069	0.4144	no	no	no
1	GRMZM2G305066			0.4515	0.4048	0.3672	0.5819	0.8919	0.0556	0.3963	0.0871	yes	yes	no
1	GRMZM2G051619			16.9885	7.4578	13.6276	36.1035	12.4459	5.6816	20.6205	4.7738	yes	yes	no
1	GRMZM2G110558			54.1567	48.4	37.2598	71.4327	44.7429	16.8616	61.6116	35.8064	yes	no	no
1	GRMZM2G160614			0.4957	0.4626	0.5148	0.7335	0.2567	0.2759	0.5259	0.46	no	no	no
1	GRMZM2G060811			5.0336	5.8679	16.6127	24.8115	9.4701	10.1722	22.2888	15.7917	no	no	no
1	GRMZM2G031963			13.3723	15.122	18.1095	29.9364	12.7551	11.315	19.4361	14.2189	no	no	no
1	GRMZM2G091527			0.8856	0.5887	0.6493	1.2024	0.3436	0.14	0.8819	0.6757	yes	no	no
1	GRMZM2G130374			7.7959	6.6312	6.1024	12.5796	4.6871	6.4183	7.1279	6.5422	no	no	no
1	GRMZM2G111922			0.7411	0.7065	0.842	1.3202	0.3183	0.4529	0.3734	0.7388	no	no	no
1	GRMZM2G420786			3.6386	2.9651	3.8936	6.87	1.9626	2.3379	2.6323	1.8829	no	yes	no
1	GRMZM2G031204			0	0.8703	9.1696	9.7087	0.0673	2.2472	0.8245	1.1115	yes	yes	no
1	GRMZM2G466908			1.9305	1.4723	3.4126	3.6171	1.5123	1.4015	2.0903	1.8496	no	no	no
1	GRMZM2G401308			792.664	1026.61	806.738	1238.18	637.418	818.789	1207.05	1003.06	yes	no	yes
1	GRMZM5G857303			3.8257	7.3947	5.8745	8.6295	2.9313	4.7883	7.2217	4.8082	no	no	no
1	GRMZM2G041223			51.6287	23.6083	47.2125	72.2616	46.0587	51.4786	65.6162	48.004	no	no	no
1	GRMZM2G100543			0.9393	1.1828	2.8511	5.2568	2.0396	1.3755	4.8224	2.6338	yes	no	no
1	GRMZM2G076798			35.8142	15.8888	35.7463	45.0443	35.8952	30.5415	29.2878	35.3791	no	no	no
1	GRMZM2G142057			3.4058	5.0386	4.3233	6.3383	2.2237	2.9581	4.1082	2.8361	no	no	no
1	GRMZM2G129302			13.8913	14.3598	13.9051	26.3945	20.4689	6.1978	22.2592	13.2188	yes	no	no
1	GRMZM2G041350			2.777	4.4577	3.3576	5.7768	1.9954	4.3845	4.6566	3.9426	no	no	no
1	GRMZM5G805030			0.4771	0.9949	0.4676	1.1497	0.366	0.7011	0.876	0.302	no	no	no
1	GRMZM2G464515			1.0251	2.1124	1.6764	2.3799	1.4547	0.917	2.3734	1.6799	no	no	no
1	GRMZM2G136534			15.1214	19.8683	19.1631	27.3615	13.6518	8.4581	21.9775	11.7453	yes	yes	no
1	GRMZM2G093962			5.2922	3.4556	12.9144	37.6062	26.2696	13.5781	20.8467	14.4697	yes	yes	no
1	GRMZM2G077845			162.446	126.277	343.561	419.228	144.779	129.916	203.244	189.948	no	no	no
1	GRMZM2G041175			4.2812	5.4569	4.8864	9.0966	4.1899	2.6246	6.2855	4.3692	yes	no	no
1	GRMZM2G158328			2.101	1.6869	4.7816	7.8475	3.51	0.3352	6.6304	0.6302	yes	yes	no
1	GRMZM2G137341			0.9477	0.6822	1.0241	9.5785	4.5858	0.2457	5.2606	0.7331	yes	yes	no
1	GRMZM2G341253			3.9257	5.2683	4.7914	7.505	2.8796	1.5838	4.805	3.0944	yes	no	no
1	GRMZM2G090595			19.8369	11.209	21.2546	33.4417	18.4791	21.6991	20.7455	21.6554	no	no	no
1	GRMZM2G037189			9.3763	10.6713	8.607	48.7559	13.7462	9.6878	23.2206	14.3948	yes	yes	no
1	GRMZM2G031580			4.5976	4.4523	11.2175	20.1969	22.3348	1.8686	10.7827	2.9633	yes	yes	no
1	GRMZM2G127162			0.2088	0.6841	0.3783	0.8083	0.119	0.0107	0.1645	0.1192	no	no	no
1	GRMZM2G136236			0	0	0	0.1821	0.0741	0.0657	0.0419	0.0762	no	no	no
1	AC177905.2_FG003			0.9846	1.1778	2.3797	4.0602	0.9188	0.4698	0.6864	1.2888	yes	no	no
1	GRMZM2G043943			7.0455	11.5147	3.7835	14.9876	3.8056	1.6519	7.0236	3.9265	yes	yes	yes
1	GRMZM2G036257			0.2193	0.1479	0.9413	1.0554	0.2445	0.0731	0.2632	0.4118	yes	no	no
1	GRMZM2G160417			35.6983	26.6966	25.3009	40.3682	22.415	19.783	33.6296	30.2738	no	no	no
1	GRMZM2G036980			0.6429	11.3766	8.0879	15.1535	6.1912	6.2578	11.5397	6.6173	no	no	no
1	GRMZM5G872392			17.6367	11.7605	25.0066	28.2163	17.0602	7.2319	15.7946	11.5868	yes	yes	yes
1	GRMZM5G892774			0.2368	0.5353	0.3888	1.137	0.3212	0.5252	0.2636	0.6193	no	no	no
1	GRMZM2G168016			0.1466	0.2449	0.2465	0.3285	0.3829	0.111	0.0817	0.2873	no	no	no
1	GRMZM2G334165			8.1145	5.552	5.7635	12.919	5.1183	2.0009	6.1643	2.1484	yes	yes	no
1	GRMZM2G109140			42.5815	31.8528	60.0156	78.8516	18.9462	13.8758	25.834	21.6396	yes	yes	no
1	GRMZM2G168304			18.1202	3.9984	18.2342	33.3033	26.3586	5.1375	30.7652	12.1415	yes	no	no
1	GRMZM2G062552			10.6982	12.8846	15.709	19.2242	8.0979	4.6048	15.3268	8.2866	yes	yes	no
1	GRMZM2G018372			0.5839	2.6364	2.1417	3.1061	1.2772	1.3962	1.8782	2.5583	yes	no	no
1	GRMZM2G077008			0.0518	0.2117	0.1966	1.1791	0.212	0.3582	0.2104	0.2362	no	yes	no
1	GRMZM2G111428			0.0344	0.0591	0.3418	0.6802	0.2012	0.0173	0.3836	0.0156	yes	yes	no
1	GRMZM2G123309			1.1228	1.4034	2.4426	3.0288	1.0792	0.5605	2.0832	0.883	yes	yes	no
1	GRMZM2G052344			16.0334	14.4335	34.7591	65.6484	13.3484	11.6487	49.997	17.8722	yes	yes	no
1	GRMZM2G145962			1.7099	5.5065	6.5265	9.572	3.7454	6.2809	6.332	5.4032	no	no	no
1	AC199068.2_FG017			5.7852	2.2859	6.821	8.4641	3.2443	3.2979	4.5471	1.8767	no	yes	no
1	GRMZM2G417770			0.3056	0.704	0.7362	1.6167	0.4422	0.4708	0.958	1.1261	no	no	no
1	GRMZM5G878558			0.2278	0.3733	4.9528	5.7107	3.3905	1.2917	4.7487	3.4465	yes	no	no
1	GRMZM5G855994			0.1277	0.0548	0.5402	1.0667	0.627	0.0139	0.5497	0.1009	yes	yes	no
1	GRMZM2G034668			9.0925	16.5779	16.2872	21.1162	8.9335	6.8161	18.8603	10.5749	yes	yes	no
1	GRMZM2G317450			0	0.0671	0	0	0.5192	0.0255	0.0303	0	no	no	no
1	GRMZM2G400439			8.6717	2.6094	7.3301	11.8346	2.6868	4.0145	4.058	2.8156	no	yes	no
1	GRMZM2G022224			0.2643	0.1709	0.2688	0.6604	0.5122	0.2449	0.1142	0.247	no	no	no
1	GRMZM2G388882			0	0	1.3796	2.558	0	0.245	0.977	0.5628	no	no	no
1	GRMZM2G112629			17.6203	5.9241	26.0978	54.265	42.5877	4.1002	35.7276	7.7018	yes	yes	no
1	GRMZM2G054807			0.7839	0.4343	0.4567	1.6747	0.8304	0.188	0.7775	0.2167	yes	yes	no
1	GRMZM2G317021			2.1906	3.17	5.018	6.9634	2.0769	0.8923	3.585	1.5739	yes	yes	no
1	GRMZM2G426732			0.0612	0.2133	0.6726	1.1809	0.3886	0.3367	0.7494	0.7991	yes	no	no
1	GRMZM2G508335			0	0.063	0	0.1246	0	0.0788	0.0401	0	no	no	no
1	GRMZM2G071112			1.5821	0.6567	1.7507	2.521	0.2315	0.9371	2.1995	2.2956	no	no	no
1	GRMZM2G149201			14.5303	14.3207	18.2808	33.5864	14.372	7.491	23.6062	16.9849	yes	no	no
1	GRMZM2G163374			0.4665	0.8479	1.1415	3.6511	0.5876	0.4371	2.7105	0.8826	yes	yes	yes
1	GRMZM2G430411			0.4164	0.671	0.6985	1.2044	0.4344	0.1894	0.7438	0.4341	no	no	no
1	GRMZM2G025895			4.6587	8.3638	7.2679	23.6012	16.9071	2.4131	16.6364	3.0437	yes	yes	no
1	GRMZM2G072645			0.9961	0.4362	0.7624	1.4192	0.3214	0.6183	0.8457	1.0352	no	no	no
1	GRMZM2G146913			1.8414	1.9757	3.6688	4.7246	1.2447	1.6709	2.84	3.3304	no	no	no
1	GRMZM2G048733			11.1761	18.0774	19.4116	25.3252	10.9191	17.274	18.6429	17.1354	no	no	no
1	GRMZM2G047422			1.1875	2.5696	10.1227	22.5979	19.9494	0.8796	14.9998	2.0172	yes	yes	no
1	GRMZM2G086750			2.6502	7.5277	8.1652	10.7824	4.6813	6.9274	9.9293	5.248	no	no	no
1	GRMZM2G370745			0.4456	0.4503	0.0584	1.4929	0.2484	0.0165	0.1391	0.0369	yes	yes	no
1	GRMZM2G066428			1.1251	0.0759	0.3948	2.9288	1.5941	0.1117	2.5595	0.1256	yes	yes	no
1	GRMZM2G459373			1.9992	1.3119	2.8935	3.9808	1.7603	0.9723	1.4616	1.579	yes	no	no
1	AC204306.3_FG007			0.2616	0.0583	0.4206	0.6564	0	0	0	0.0229	no	yes	no
1	GRMZM2G163843			0.1986	0.2545	0.463	0.5565	0.4381	0.0935	0.2719	0.2614	no	no	no
1	GRMZM5G834260			1.6956	0.4958	1.8697	2.9448	0.2441	0.1032	1.1798	1.0395	yes	no	no
1	GRMZM2G100133			1.0661	3.5006	0.951	5.6201	0.6977	2.0998	1.6413	2.6229	no	no	no
1	GRMZM2G055629			0.1838	0	0	1.1815	0.7638	0.6871	0	0	no	no	no
1	AC225718.2_FG006			23.4768	8.797	37.0538	111.141	92.4461	5.3271	78.8809	8.1263	yes	yes	no
1	GRMZM2G151738			9.4488	6.8376	12.7996	19.5147	8.7628	6.7434	15.2609	11.1399	no	no	no
1	GRMZM2G154449			0	0.6526	0.1089	0.948	0.0787	0.0645	0.0642	0.2027	no	no	no
1	GRMZM2G140694			3.1535	4.4614	5.0913	7.9759	1.7057	3.208	3.7913	5.7552	no	no	no
1	GRMZM2G426213			0.2329	0.4587	0.6794	0.8755	0.3578	0.3186	0.7716	0.202	no	no	no
1	GRMZM2G399921			0.7144	0.6896	0.0478	1.2258	0.2699	0.0269	1.3401	0.4969	no	no	no
1	GRMZM2G176576			42.0892	26.8682	48.4412	66.213	40.7473	37.4974	43.6616	39.4138	no	no	no
1	GRMZM2G442920			0.5787	1.9471	2.0578	3.4993	1.8887	0.1459	2.7742	0.5818	yes	yes	no
1	GRMZM2G172297			3.7234	2.8375	4.9414	8.6761	3.5002	4.0855	8.2878	5.5122	no	no	yes
1	AC195957.3_FG003			2.2049	5.6215	8.1297	12.1314	3.2617	3.5263	3.4544	4.0991	yes	no	no
1	GRMZM2G333142			4.9805	1.8782	3.7336	8.1194	5.6134	0.9149	1.4454	5.0668	yes	no	no
1	GRMZM2G131262			25.8999	30.0152	23.8442	49.4813	16.7166	12.08	14.2358	16.5911	yes	yes	no
1	GRMZM2G055585			5.1458	11.6226	10.3416	15.1433	4.0319	1.6544	9.5794	3.1638	yes	yes	yes
1	GRMZM2G055052			1.7036	1.53	1.3797	3.0186	1.4259	0.5718	1.7738	0.6183	yes	yes	no
1	GRMZM2G070167			15.4247	14.7019	14.3091	22.5677	6.3121	6.8791	7.7948	3.9706	yes	yes	no
1	GRMZM2G122937			5.5664	17.3517	49.4236	53.6611	29.1114	31.3898	39.7069	28.4009	no	no	no
1	GRMZM2G025685			32.6213	32.1403	50.9685	65.9432	28.4897	22.3279	52.6818	34.6376	yes	no	no
1	GRMZM2G173596			1.271	0	0.4854	2.2047	0.4368	0.6231	0.3722	0.1697	no	yes	yes
1	GRMZM2G096904			1.0581	1.7764	0.9089	3.888	1.3393	0.0971	1.0288	0.1152	yes	yes	no
1	GRMZM2G026976			0.0844	0.1805	0.2822	0.8218	0.458	0.2136	0.9188	0.4713	yes	no	no
1	GRMZM2G136106			4.6699	3.4785	7.6227	10.3056	5.9111	2.4179	9.2332	3.6653	yes	yes	no
1	GRMZM2G030882			9.8009	10.3828	15.1786	17.0576	5.3568	2.0623	11.5095	4.6314	yes	yes	yes
1	GRMZM2G129209			4.1084	2.7977	7.6052	9.5505	3.8143	5.1	7.6326	2.9502	no	yes	no
1	GRMZM2G700192			0.6628	0.8379	1.2991	1.9444	0.5609	0.8023	0.8657	1.1703	no	no	no
1	GRMZM2G037386			13.3337	10.9383	13.9066	24.9381	7.1713	4.3878	11.1092	7.5251	yes	yes	no
1	GRMZM2G143747			3.1216	5.2879	3.651	7.0571	1.7617	1.6693	4.0556	2.8758	yes	no	no
1	GRMZM2G702522			0.4712	0.53	0.7315	1.0834	0.3172	0.7184	0.9268	0.6635	no	no	no
1	GRMZM2G148400			0.6874	0.8152	0.735	2.2035	0.684	0.8862	0.609	1.2633	no	no	no
1	GRMZM2G474755			0.691	0.8714	3.9483	12.0353	7.3451	0.3574	10.8405	1.1583	yes	yes	no
1	GRMZM2G400714			0.6301	0.3287	0.182	1.1898	0.6513	0.1719	1.2773	0.1473	yes	yes	no
1	GRMZM2G144024			0.4027	0.4241	1.5044	7.7385	3.202	0.2724	1.884	0.5715	yes	yes	no
1	GRMZM2G423142			0.092	0.0767	0.1378	0.3659	0.0268	0.0142	0.0304	0.0308	yes	no	no
1	GRMZM2G148270			22.9493	15.4835	35.4347	45.5511	19.3128	24.7277	34.1929	24.8333	no	no	no
1	GRMZM2G126062			0.3471	0.2797	0.1793	0.7514	0.3924	0.1373	0.2305	0.291	no	no	no
1	GRMZM2G124473			0.4576	1.1681	1.952	2.6128	0.8068	1.1795	1.8329	0.6166	no	yes	no
1	GRMZM2G041809			0.7269	0.9856	1.2271	3.6556	2.2103	0.2386	2.2456	0.672	yes	yes	no
1	GRMZM2G096407			0	0.1121	0.3797	0.6848	0.1001	0.2169	0	0.0704	no	no	no
1	GRMZM2G068202			0.5155	0.2493	1.9878	2.4768	0.6917	0.0788	1.3059	0.5931	yes	no	no
1	GRMZM2G110423			24.2059	15.0214	21.4568	29.32	13.4966	20.3101	17.8232	16.4505	no	no	no
1	GRMZM5G869788			8.5327	8.5185	6.1064	11.4911	4.537	4.3544	7.6107	4.9776	no	no	no
1	GRMZM2G441565			7.1629	12.0223	19.5707	28.3366	9.9352	4.4113	20.9284	8.5729	yes	yes	no
1	GRMZM2G010987			3.4765	2.882	1.8108	4.6308	2.1021	0.7454	2.8509	2.0211	yes	no	no
1	GRMZM5G806975			10.9271	3.3559	13.4475	18.7068	6.1871	10.4982	8.8255	11.6871	no	no	no
1	GRMZM2G305856			2.3541	4.0238	3.2213	4.8305	3.4185	3.6521	3.0004	1.3778	no	yes	no
1	GRMZM2G080183			6.0421	4.2054	4.0616	9.0875	3.0495	1.4086	5.9969	2.0347	yes	yes	no
1	GRMZM2G320269			2.2368	1.997	2.9459	5.8904	1.5603	2.6586	3.6551	2.3438	no	no	no
1	GRMZM2G365134			1.7079	4.1726	2.8335	5.5611	1.4015	2.2206	5.8073	3.3649	no	no	no
1	AC210669.3_FG001			73.5674	52.982	189.662	323.571	244.979	60.4416	246.706	160.911	yes	no	no
1	GRMZM2G124011			0.743	0.1047	0.2044	1.1505	0.135	0.1023	0.9609	0.0862	yes	yes	no
1	GRMZM2G401436			0.7569	2.3116	2.7444	4.6791	1.6205	1.452	3.3409	1.0334	yes	yes	no
1	GRMZM2G146644	cko1	cytokinin oxidase1	0.0652	0.1278	0.0616	0.3559	0.015	0.1693	0.0512	0.1618	no	no	no
1	GRMZM2G163998			16.8605	11.3361	15.7512	25.8415	8.0835	6.2318	18.0376	8.4743	yes	yes	no
1	GRMZM2G371793			2.1016	0.0964	2.3318	3.1655	1.5766	1.7357	2.7924	2.4474	no	no	no
1	GRMZM2G335242			0.1774	0.1946	0.8043	1.7305	0.1622	0.1483	1.722	0.5139	no	no	no
1	GRMZM2G440968			8.1504	10.8094	7.6287	23.659	4.868	4.5094	7.3491	12.6534	yes	no	no
1	GRMZM2G165567			37.7253	22.1788	45.9256	51.6409	21.4959	38.7847	27.7552	26.6961	no	no	no
1	GRMZM2G112598			0.2997	0.5486	0.1761	0.6522	0.2848	0.1398	0.3559	0.2303	yes	no	no
1	GRMZM2G113267			29.7882	19.8007	32.4319	36.8141	23.3914	24.647	25.9323	22.2984	no	no	no
1	GRMZM2G022836			1.2007	0.9333	0.4699	1.5904	0.5947	1.0953	1.0337	0.3088	no	no	no
1	GRMZM5G821637			10.6285	9.3815	17.299	30.3785	13.6452	6.5972	14.2539	6.8247	yes	yes	yes
1	GRMZM2G101080			3.6973	3.0779	2.2492	6.2971	1.4515	3.7317	2.4097	2.7885	no	no	yes
1	GRMZM2G060079			11.8688	15.8526	19.3649	22.8057	15.3265	10.4619	20.7047	12.4664	yes	no	yes
1	GRMZM2G133023			1.9716	1.9411	2.1735	3.021	1.9636	1.1502	2.152	0.9936	yes	yes	no
1	GRMZM2G178815			2.7956	2.5572	2.9562	7.4236	1.23	1.2113	3.9725	2.6711	yes	no	no
1	GRMZM2G045319			1.9537	3.0976	2.7915	6.3317	3.329	3.783	4.1978	3.1865	no	no	no
1	GRMZM2G127690			1.4058	1.0857	5.997	12.1197	7.6443	0.2729	9.4863	1.1416	yes	yes	no
1	GRMZM2G171994			1.621	1.6524	2.5234	2.6307	1.0922	0.8778	1.2899	1.3408	no	no	no
1	GRMZM2G381576			1.3828	2.6384	1.8113	3.0013	1.8452	0.2606	1.693	0.3203	yes	yes	no
1	GRMZM2G113668			10.4991	32.8472	21.0332	36.9717	21.1351	10.3065	31.0145	11.2994	yes	yes	yes
1	GRMZM2G112377			1.384	0.5337	2.9369	10.8042	1.7808	1.6853	6.4166	4.8348	yes	no	no
1	GRMZM2G160506			6.1846	7.3997	4.7113	10.4243	2.8482	4.1935	4.3335	5.9482	yes	no	no
1	GRMZM2G001991			1.7461	0.7345	1.7187	2.3291	0.8321	0.5384	1.5811	1.5897	yes	no	no
1	GRMZM2G371606			2.0167	2.6298	3.7806	4.9863	1.3562	2.1483	4.0709	2.9113	no	no	no
1	GRMZM2G124567			21.2749	18.6309	26.0863	62.8618	24.8325	27.6049	24.6708	50.2515	no	no	no
1	GRMZM2G552956			0.0424	0.2482	1.5825	2.8671	1.9354	1.0815	1.7153	0.1323	no	yes	no
1	GRMZM2G144648			54.0513	51.7819	35.0591	82.084	16.5988	7.6357	41.1467	22.1262	yes	yes	no
1	GRMZM2G179677			35.114	32.3206	30.6244	56.4454	25.897	33.46	28.1785	34.5508	yes	no	no
1	GRMZM2G542272			1.0793	1.077	2.7682	4.8084	4.5008	0.2945	3.358	0.1824	yes	yes	no
1	GRMZM2G086876			0.4415	0.8771	0.2958	1.1502	0.2492	0.5489	0.4298	0.5459	no	no	no
1	GRMZM2G021794			1.8594	2.1668	2.1162	4.6575	0.9581	0.423	1.7714	0.7034	yes	yes	no
1	AC207189.4_FG002			0.3281	0	0	0.7439	0.2116	0	0	0	no	no	no
1	GRMZM5G839349			1.4981	1.2525	1.9563	2.7827	0.7805	0.5736	2.0354	0.7584	yes	yes	no
1	GRMZM2G144638			3.1168	1.4363	2.7084	4.5133	1.2817	1.7486	3.4482	2.426	no	no	no
1	GRMZM2G023791			2.4849	2.8694	3.431	4.7345	1.6337	0.9752	2.6173	1.3445	yes	yes	no
1	GRMZM2G335419			0.029	0.1901	0.2145	0.5567	0.0503	0.0355	0.4842	0.158	no	no	no
1	GRMZM2G028608			0.277	0.1613	0.2641	0.6289	0.3514	0.1425	0.3093	0.2031	no	no	no
1	GRMZM5G845782			32.8519	37.9202	27.5743	52.0285	40.7094	24.2368	47.2562	27.2502	yes	no	no
1	GRMZM2G018553			2.2038	0.6298	2.8866	6.2386	4.0571	3.4277	2.7543	0.773	no	yes	no
1	GRMZM2G086163			2.1102	0.9477	2.3868	3.2818	1.8048	0.5021	2.5978	0.6132	yes	yes	no
1	GRMZM2G031528			4.3325	8.7388	6.9039	11.2907	4.5506	5.0455	4.4052	6.1197	yes	no	no
1	GRMZM2G151257			0.7314	0.196	1.0558	2.1115	1.3585	0.1514	1.9926	0.2539	yes	yes	no
1	GRMZM2G010927			1.6201	1.6732	1.9521	3.0224	0.8431	0.6983	2.0802	1.3206	yes	no	no
1	GRMZM2G333980			2.9849	4.641	3.305	22.4628	12.8103	1.0228	7.9828	1.5145	yes	yes	no
1	GRMZM2G176723			1.8879	1.8953	2.786	4.3433	0.6038	0.3356	1.2271	0.8494	yes	yes	yes
1	GRMZM2G147756			16.6419	13.0601	13.2249	26.1127	13.8908	4.9937	18.6506	11.4549	yes	no	no
1	GRMZM2G061723			0.7537	0.7712	0.8845	1.7425	0.6795	0.2276	0.4067	0.2153	yes	yes	no
1	GRMZM2G105510			15.4844	7.3494	10.1644	20.8586	7.3064	5.364	9.5239	9.2629	yes	no	no
1	GRMZM2G150059			0.6276	0.0368	1.2433	2.6446	1.118	0.2119	0.8141	0.4698	yes	yes	no
1	GRMZM2G021035			0.5986	0.4957	0.6298	1.5679	0.5544	0.1653	1.3566	0.6661	no	no	no
1	GRMZM2G332258			0.0538	0.1744	0.2697	0.52	0.1692	0.1387	0.1258	0.4309	no	no	no
1	GRMZM2G342243			14.1822	9.7076	14.9175	17.5838	17.2609	13.4544	17.9147	14.2765	no	no	no
1	GRMZM2G459752			4.3172	3.7037	9.9229	11.7039	5.7458	5.1739	9.0291	5.7008	no	no	no
1	GRMZM2G051197			0.6977	1.772	3.3192	5.1999	1.9274	1.082	3.3494	1.5181	yes	yes	no
1	GRMZM2G067734			10.2837	15.6396	16.7305	24.6484	10.6112	7.4241	23.3759	12.3057	yes	no	no
1	GRMZM2G087878			0.1926	0.7406	0.3154	0.93	0.1834	0.0733	0.6611	0.1175	yes	yes	no
1	GRMZM2G145412			0.4228	0.0848	0.1455	4.2148	0.1933	0.5228	0.8793	0.0603	yes	yes	yes
1	GRMZM2G037001			3.993	5.2181	7.5225	10.3305	5.2276	4.021	8.9076	5.1411	no	no	no
1	GRMZM2G003738			0.1922	0.3535	1.8759	3.8596	1.7538	0.2876	1.8469	0.2591	yes	yes	no
1	GRMZM2G100452			0.9628	0.5596	0.943	1.5633	0.4066	0.3044	0.6407	0.3156	yes	yes	no
1	GRMZM2G062283			0.1259	0.2581	0	0.3936	0.165	0.2159	0.1044	0.0922	no	no	no
1	GRMZM2G153575			0.3219	0.3723	0.613	1.4779	0.6406	0.2783	1.3937	0.6743	yes	no	no
1	GRMZM2G138330			4.0926	3.9041	4.1229	5.9389	2.0182	1.8346	5.4946	3.17	yes	no	no
1	AC194005.3_FG004			2.4607	2.3014	0.7961	4.7548	0	1.5411	1.984	2.4049	no	no	no
1	GRMZM2G150791			7.7013	7.1904	8.0906	13.7802	4.4385	3.8728	9.1164	4.7811	yes	yes	no
1	GRMZM2G411691			0.4513	0.899	0.5252	1.9897	0.3143	0.086	0.573	0.1977	yes	yes	yes
1	GRMZM2G062527			5.7101	11.7983	14.5115	28.1781	10.2332	6.4666	23.6784	16.8286	yes	no	no
1	GRMZM2G014392	vp14	viviparous14	2.6586	5.3381	6.8446	11.1477	5.7118	2.5337	4.6311	1.2479	yes	yes	no
1	GRMZM2G178229			3.0139	2.8741	2.193	4.5549	1.5606	2.332	3.3183	2.9381	no	no	no
1	GRMZM2G117321			5.7979	1.8255	4.8798	7.9895	3.9208	4.378	3.293	5.3869	no	no	no
1	GRMZM2G014071			3.9791	1.9248	3.9913	4.7742	3.2171	3.6058	2.5806	3.1417	no	no	no
1	AC225346.3_FG001			0.1618	4.6792	3.3995	15.1492	1.5633	3.0212	2.0463	5.2992	yes	no	yes
1	GRMZM2G360857			2.4287	9.5762	12.5792	14.4407	13.4038	8.4029	11.309	10.5943	no	no	no
1	GRMZM2G060940			1.9673	11.5737	3.6716	14.9539	3.0974	5.5567	7.2284	6.9806	yes	no	no
1	GRMZM5G865162			0.9113	0.611	0.9616	1.6146	0.75	0.7951	0.7917	1.0077	no	no	no
1	GRMZM2G152553			1.006	2.2172	3.5611	5.3729	1.6089	1.0852	3.1577	1.6678	yes	yes	no
1	GRMZM5G859061			1.2963	2.5328	4.226	6.2366	2.6561	2.2357	1.7358	2.557	no	no	no
1	GRMZM2G431885			4.3172	3.7037	9.9229	11.7039	5.7458	5.1739	9.0291	5.7008	no	no	no
1	GRMZM2G148194			23.4471	13.2798	24.4554	35.1336	13.6989	18.1831	17.9288	14.2556	no	yes	no
1	GRMZM2G400784			3.397	3.5325	7.2668	9.9763	3.8762	1.616	7.6498	2.5633	yes	yes	yes
1	GRMZM2G126386			1.6244	1.9164	1.6359	5.3373	2.1275	0.9141	4.129	1.3485	yes	yes	no
1	GRMZM2G098056			7.3279	10.3842	3.4436	12.9366	3.9136	6.7606	6.0663	8.1247	no	no	no
1	AC226552.2_FG001			0.2359	1.3214	1.7967	2.4536	0.7261	1.2256	1.2064	0.9612	no	no	no
1	GRMZM2G023786			0.3464	1.4168	1.3698	3.3525	0.8701	1.6803	1.5514	1.9783	no	no	no
1	AC206199.3_FG005			0	0.1991	0.2916	1.0152	0.071	0	0.1627	0.0441	no	no	no
1	GRMZM2G347043			12.8376	6.3778	13.8286	25.5597	19.487	1.9457	22.4898	2.7826	yes	yes	no
1	GRMZM2G159404			0.7769	1.4594	1.6817	2.0097	1.0431	0.5224	1.7818	0.9227	yes	no	no
1	GRMZM2G371670			0.1405	0.4511	1.1395	1.2392	0.5965	0.6613	0.7821	0.8041	no	no	no
1	GRMZM5G836406			1.1655	0.1659	1.6614	1.7675	0.632	0.4735	0.3877	0.6455	no	no	no
1	GRMZM2G116167			5.2381	10.1362	9.5393	17.8201	6.1234	2.0335	11.6121	5.8886	yes	yes	yes
1	GRMZM5G847466			2.0117	3.5091	4.8801	11.989	6.1644	0.7466	9.5587	2.3379	yes	yes	no
1	GRMZM2G174315			4.3207	2.9758	2.2943	4.8861	2.3995	3.679	3.8021	3.1803	no	no	no
1	GRMZM2G090609			11.201	21.115	26.8875	35.0815	13.8684	20.4584	18.9613	17.7973	no	no	no
1	GRMZM2G359322			7.8701	3.1025	7.4553	16.3436	5.8622	7.0399	7.6169	6.4037	no	no	no
1	GRMZM2G113682			2.8014	2.1189	1.9505	4.0385	1.4557	0.6984	2.5375	1.3767	yes	no	no
1	GRMZM2G140455			3.2664	1.135	3.878	9.8901	4.618	2.1783	8.7276	6.2766	yes	no	no
1	GRMZM2G028665			0.7114	0.9342	0.7966	1.857	0.864	1.412	1.2216	0.7595	no	no	no
1	GRMZM2G026095			1.1668	1.2111	3.2286	3.9607	0.7076	0.4014	1.376	1.0527	yes	yes	no
1	GRMZM2G154678			0.3506	0.2574	0.0821	0.7098	0.1521	0.0672	0.1635	0.0176	yes	yes	no
1	GRMZM5G869299			2.1302	1.4837	4.2919	6.0261	2.8701	3.6146	5.3403	2.5261	no	no	no
1	GRMZM2G434500			0.159	0.1837	0.7473	1.1487	0.5713	0.3552	1.0427	0.6021	yes	no	no
1	GRMZM2G050234			1.3799	1.0664	2.4374	4.7387	1.7093	1.6693	3.3807	1.1928	no	yes	no
1	GRMZM2G082032			10.4835	10.823	13.2172	52.4823	10.4031	2.4505	38.5981	10.8398	yes	yes	no
1	GRMZM2G154078			0.949	1.2566	0.5701	1.5846	0.6947	0.6644	0.891	0.6079	no	no	no
1	AC188721.3_FG001			0.4237	1.2174	2.4222	2.6848	0.8079	1.4104	0.5364	1.1112	no	no	no
1	GRMZM2G331027			2.2181	1.4907	1.334	3.8938	1.5721	1.2471	1.5292	2.0785	yes	no	no
1	GRMZM2G319062			12.8566	4.8279	6.4912	20.5892	5.4048	4.8736	9.9412	11.2042	yes	no	yes
1	GRMZM2G022904			0.4813	0.0976	0.387	1.1352	0.5895	0.2789	0.744	0.2786	yes	no	no
1	AC206425.3_FG004			1.065	1.2837	0.9856	2.3794	0.8104	1.4228	0.8016	1.0121	no	no	no
1	GRMZM2G094632			3.8046	1.9518	3.509	4.6019	1.5888	3.3503	1.8859	1.9446	no	no	no
1	GRMZM2G038152			30.9587	29.4644	21.9413	38.6804	16.8097	17.4426	16.3092	18.2476	no	no	no
1	GRMZM2G007372			0.0619	0.1559	0.1314	0.6727	0.0689	0.2759	0.2345	0.3372	no	no	no
1	GRMZM2G439238			0.5185	0.6213	2.6442	5.5189	0.9666	1.3377	0.9252	2.0063	no	no	no
1	GRMZM2G088819			2.154	0.3576	1.417	3.2591	1.7955	0.092	1.3857	0.1041	yes	yes	no
1	GRMZM2G440562			3.0504	2.535	8.314	9.8999	3.451	1.3681	5.0263	3.2866	yes	yes	no
1	GRMZM2G158140			10.4071	12.0771	11.5463	20.7698	7.3502	6.212	11.852	9.8114	yes	no	no
1	GRMZM2G120779			17.1483	7.0141	5.6775	21.4905	7.7875	3.8822	9.597	10.0537	yes	no	yes
1	GRMZM2G136525			4.6243	12.4512	7.5697	17.6	4.3767	3.3518	5.5717	5.6141	yes	yes	no
1	GRMZM2G122340			0.922	1.2719	0.756	3.2549	0.2524	0.2669	1.1459	1.0981	yes	no	no
1	GRMZM2G368799			3.5338	2.9654	2.1381	4.2497	1.574	2.8992	3.9189	1.5435	no	no	no
1	GRMZM2G353313			0.919	1.1534	3.7619	5.5601	1.2718	2.6144	4.3488	2.403	no	no	no
1	GRMZM2G180620			0.4718	0.2739	0.6672	0.7904	0.4976	0.2677	0.2117	0.3861	no	no	no
1	GRMZM2G071180			0.6988	0.5702	0.2577	0.9946	0.6304	0.3035	0.5645	0.551	no	no	no
1	GRMZM5G898274			0.1515	0.9838	1.6607	2.5079	0.7331	0.1045	0.46	0.3477	no	no	no
1	GRMZM5G882482			2.2527	0.8161	0.4135	6.4674	0.7549	2.5583	1.9659	1.0649	no	yes	no
1	GRMZM2G042677			1.0595	3.4841	2.0223	3.5787	1.5256	1.2706	3.4638	2.5423	no	no	no
1	AC205471.4_FG007			2.892	3.6782	2.5878	10.8601	2.3375	0.4852	2.3686	1.6276	yes	yes	no
1	GRMZM2G130943			0.3579	0.6229	1.143	2.6633	1.789	0.4866	0.982	0.3331	yes	yes	no
1	GRMZM2G095811			0.3332	0.5174	2.393	2.9592	1.3184	0.5312	1.4006	0.5751	yes	yes	no
1	GRMZM2G380432			2.6378	1.1698	1.5566	23.3098	6.1466	0.5676	6.3678	0.5174	yes	yes	yes
1	GRMZM2G126990			11.6862	9.7276	18.9211	22.3943	9.0598	8.3976	20.0173	10.4561	no	no	no
1	GRMZM2G129300			0.5972	0.5076	1.3746	1.6045	0.8772	0.6079	0.3556	0.6634	no	no	no
1	GRMZM2G115504			2.399	1.5735	7.1865	8.249	4.2375	3.5559	5.6497	4.2452	no	no	no
1	GRMZM2G120964			0.1807	0.3777	1.4556	2.5113	1.1884	0.5483	1.2334	1.0208	yes	no	no
1	GRMZM2G303829			7.329	5.4718	11.9679	14.5778	3.8368	5.087	10.9541	10.9746	no	no	no
1	GRMZM2G350658			0.238	0.8095	0.5999	1.7783	1.388	0.0813	1.2341	0.1985	yes	yes	no
1	GRMZM5G854500			0.114	0.3865	0.1187	0.4646	0.1242	0.0411	0.1828	0.085	no	no	no
1	GRMZM2G478876			13.7405	12.7016	22.8635	27.7134	14.0343	10.9086	19.3348	16.687	yes	no	no
1	GRMZM2G133684			2.5079	5.2688	3.3649	9.4044	4.0631	5.0534	3.7734	4.7255	no	no	yes
1	GRMZM2G115357			9.9389	11.4268	21.3136	56.5455	46.526	13.8608	29.2667	12.7649	yes	yes	no
1	GRMZM2G095826			19.1186	25.1416	17.8215	31.7385	15.4407	14.3958	25.0005	22.0033	no	no	no
1	GRMZM2G044472			2.1832	3.8641	3.1419	4.5556	2.3814	1.6997	3.5136	3.4269	no	no	no
1	GRMZM2G046474			2.0384	8.3357	6.54	10.0754	5.0018	3.8018	6.1374	4.905	yes	no	no
1	GRMZM5G806638			0.0914	0.0423	0.1186	0.4846	0.2586	0.0072	0.335	0.0193	yes	yes	no
1	GRMZM2G112965			0.3231	0.7427	0.7855	1.0005	0.4957	0.4042	0.5292	0.303	no	no	no
1	GRMZM2G431030			1.2741	2.6641	4.3743	6.3177	2.7536	1.9651	4.7567	2.2026	yes	no	no
1	GRMZM2G041369			4.7832	5.0706	5.2933	7.8296	3.6657	2.1421	6.3336	4.6387	yes	no	no
1	GRMZM2G060760			2.5561	2.6334	3.5705	4.7328	1.2605	1.1587	3.394	1.1753	yes	yes	no
1	GRMZM2G437758			0.6925	0.4736	0.4315	1.0982	0.2628	0.1887	0.5111	0.4825	no	no	no
1	AC216247.3_FG001			0.1522	2.1141	1.8438	3.1479	0.34	1.1597	2.5531	1.264	no	no	no
1	GRMZM5G873455			1819.86	2521.57	2123.74	3351.19	1917.23	1997.8	3014.18	2719.26	yes	yes	yes
1	GRMZM2G017470			1.1479	1.8677	1.0768	2.9785	1.1898	1.5328	1.9768	2.1957	no	no	no
1	GRMZM2G072578			28.9913	11.7574	31.2532	54.7537	19.7959	12.5398	22.7836	20.5172	yes	yes	yes
1	GRMZM2G527250			0.0143	0.1377	0.1227	0.4599	0.0616	0.2019	0.1022	0.2186	no	no	no
1	GRMZM2G119311			9.9736	22.3517	17.0863	38.7746	9.7318	15.9164	27.4562	20.5689	no	no	no
1	GRMZM2G371795			9.0601	10.0979	10.3914	15.9876	4.6623	5.0464	11.8147	11.4269	yes	no	no
1	GRMZM2G148281			55.1902	32.762	43.1647	62.0531	42.2959	47.4574	55.226	54.4894	no	no	no
1	GRMZM2G040840			0.5995	0.5306	1.0813	1.8909	0.8908	0.3059	1.7475	0.3477	yes	yes	no
1	GRMZM2G009365			36.0428	33.2155	37.7011	49.6547	21.9323	22.6456	35.2314	32.4878	no	no	no
1	GRMZM2G081928			0.4771	0.2426	0.2854	0.8087	0.1323	0.1126	0.3374	0.1212	yes	yes	no
1	GRMZM2G112247			10.9816	2.9574	11.0553	21.2207	7.3126	5.6426	13.9088	8.8466	yes	no	no
1	GRMZM2G421463			0.2626	0.3047	0.7529	0.8685	0.344	0.1316	0.4668	0.1576	yes	yes	no
1	GRMZM2G106443			0	0.1056	0.3245	0.4211	0.2263	0.0882	0.3174	0.0848	no	no	no
1	AC207205.3_FG004			0.4271	0.6262	0.9618	2.0173	0.5195	0.2519	0.625	0.7663	no	no	no
1	GRMZM2G084264			0.0325	0.2686	1.0948	2.3941	0.5713	0.0741	2.0126	0.2432	yes	yes	yes
1	GRMZM2G007441			0.2073	0.351	0.2283	0.4968	0.0416	0.0325	0.077	0.1633	no	no	no
1	GRMZM2G430039			11.736	11.0275	12.3206	21.7479	8.2688	8.0804	16.525	11.0225	no	no	no
1	GRMZM2G072065			11.8104	8.6724	16.2193	20.0102	7.6392	5.5748	13.0684	8.4279	yes	no	no
1	GRMZM2G053503			14.5804	16.9506	13.8177	31.9585	8.9779	20.9186	33.7147	19.8238	no	no	no
1	GRMZM2G105419			1.7775	1.1312	1.083	2.578	1.0254	0.8567	0.4469	0.7254	no	no	no
1	GRMZM5G885766			2.0942	10.1616	8.3417	12.9019	4.9325	6.06	10.6141	7.9737	no	no	no
1	GRMZM2G347956			12.7668	11.7213	10.6869	16.0458	6.8819	6.3201	10.3763	6.5838	no	no	no
1	GRMZM2G703998			0.3979	0.2152	0.3774	0.5692	0.117	0	0	0.0724	no	yes	no
1	GRMZM2G065021			3.1302	4.8558	6.2275	8.6096	4.3243	0.9865	6.0024	2.653	yes	yes	no
1	GRMZM2G072292			3.8542	2.1344	6.2599	9.558	1.9177	4.7768	5.0958	3.8102	no	no	no
1	GRMZM2G043493			136.971	159.106	162.304	284.324	113.054	116.435	88.6735	197.171	no	no	no
1	GRMZM2G168002			19.7204	27.7001	26.6891	34.1199	13.5472	10.2441	22.1695	15.0121	yes	yes	no
1	GRMZM2G108859			10.436	15.3567	13.3734	18.3137	9.2277	4.351	13.506	8.4056	yes	no	no
1	GRMZM2G441541			2.1153	2.6431	3.8871	7.0134	3.0551	1.7068	6.6506	3.605	yes	no	no
1	GRMZM2G049654			0.5101	0.7368	0.3771	1.1552	0.1031	0.282	1.1351	0.4369	no	no	no
1	GRMZM2G110067			0.7611	1.5185	1.505	2.0202	0.394	0.0961	0.9553	0.3362	yes	yes	yes
1	GRMZM2G019246			4.5894	2.862	4.4215	8.1681	5.3063	3.6453	6.7493	5.056	no	no	no
1	GRMZM2G042756			0.4544	0.5916	2.8051	10.2324	9.842	5.9858	8.065	2.1214	no	yes	no
1	GRMZM2G054900			0.074	0.1297	0.1344	1.9086	0.2621	0.0392	0.2779	0.0378	no	no	no
1	GRMZM2G180054			1.0366	0.8898	0.6159	1.7057	0.7849	0.2432	0.5832	0.4583	no	no	no
1	AC198725.4_FG004			0.478	0.5986	0.2196	1.0497	0.1009	0.0645	0.3483	0.0996	yes	yes	yes
1	GRMZM2G151476			0.0589	0.3033	0.078	0.3621	0.0991	0.034	0.1453	0.0802	no	no	no
1	GRMZM5G866420			3.8824	5.5741	9.0718	10.4801	5.6104	2.5216	3.9781	3.3914	yes	no	no
1	GRMZM2G151955			44.0737	57.2164	48.5316	92.9595	34.5541	21.7035	52.4815	44.7105	yes	no	no
1	GRMZM2G060148			6.4283	2.6686	8.0383	12.9555	4.5378	2.3907	11.402	4.738	yes	yes	no
1	GRMZM2G153523			3.5746	1.8237	5.5843	10.4766	11.0524	0.844	9.25	2.2544	yes	yes	no
1	GRMZM2G069664			0.0687	0.0869	0.7582	1.1821	0.1789	0.0712	0.4712	0.2709	no	no	no
1	GRMZM2G314125			0.0346	0.2545	1.8035	2.2489	1.6991	0.6802	0.8678	1.2631	no	no	no
1	GRMZM2G405592			1.5381	1.2175	0.7528	2.6106	0.3746	1.0464	2.5584	1.2996	no	no	no
1	GRMZM2G114948			0	0	0.0782	0.741	0.5799	0.2499	0.1813	0	no	no	no
1	GRMZM2G325332			1.9515	3.1837	3.6254	5.797	2.6862	2.0262	3.5138	1.976	no	no	no
1	GRMZM5G852378			0.7871	0.7659	0.9373	1.3346	0.5851	0.2041	1.2019	0.443	yes	no	no
1	GRMZM2G085939			8.1121	6.938	7.6576	11.5373	3.5597	4.9631	7.9741	4.2916	no	no	no
1	GRMZM2G428184			0.8624	1.4992	1.2254	2.1293	0.5877	0.6569	1.9528	1.1344	no	no	no
1	GRMZM2G133558			0.0249	0.6019	0.4962	0.9175	0.3086	0.2591	0.7036	0.4428	yes	no	no
1	GRMZM2G143457			0.233	0.2688	1.1017	2.1525	1.1754	0.7919	2.0167	1.1192	no	no	no
1	GRMZM2G052507			615.533	372.205	612.154	824.531	501.926	469.867	575.556	591.833	yes	no	no
1	AC210168.4_FG003			6.58	6.3481	11.5966	21.1231	4.3611	1.3295	5.8566	5.0241	yes	yes	no
1	GRMZM2G177050			6.2984	2.2052	1.5258	8.7584	5.369	0.7869	6.2471	0.6246	yes	yes	no
1	GRMZM2G104176			15.0285	11.458	16.2145	22.1198	10.9161	10.2912	17.9114	11.3697	no	no	no
1	GRMZM2G142918			34.3843	33.2846	54.8854	65.5386	26.3053	12.2732	41.0696	23.0952	yes	no	no
1	GRMZM5G832780			0.5882	0.2328	0.1908	1.4638	0.0747	0.3258	0.1662	0.087	no	yes	no
1	GRMZM2G381025			0.3034	1.48	0.9243	1.5367	0.6676	0.6357	1.1109	0.865	no	no	no
1	GRMZM5G882025			1.2799	1.384	2.1215	4.6886	1.254	0.2722	1.6563	0.8714	yes	yes	yes
1	GRMZM2G018254			0.2073	1.4526	0.1654	2.1408	0.2446	0.5516	0.3633	1.2606	no	no	no
1	GRMZM2G012566			2.1807	3.8265	6.1065	7.9075	3.4022	2.8114	4.2634	4.8839	yes	no	no
1	GRMZM2G151204			0.4854	0.4758	0.7705	1.164	0.5278	0.2046	0.8793	0.5242	yes	no	no
1	GRMZM2G131055			1.5073	0.3243	0.3633	4.8837	1.358	0.0969	1.6742	0.1818	yes	yes	no
1	GRMZM2G120592			0.3206	1.3627	0.1799	1.8756	0.2265	0.318	0.4247	0.3162	no	no	no
1	GRMZM2G700665			0.0826	0.3422	0.264	0.6848	0.0927	0.134	0.3222	0.2102	no	no	no
1	GRMZM2G451769			0.6285	0.4378	0.6993	4.0596	0.9184	0.1191	1.6623	0.116	yes	yes	no
1	GRMZM2G361210			1.2662	0.862	0.9746	5.1672	4.0787	0.1825	3.7954	0.0982	yes	yes	no
1	GRMZM2G004516			0.8829	0.7113	1.1791	1.6509	0.5311	0.6672	1.6319	0.7742	no	no	no
1	AC194103.3_FG006			3.2453	4.2185	5.1783	6.3672	2.7594	0.9867	2.9089	1.8915	yes	yes	no
1	GRMZM5G830269			7.6049	10.3293	10.579	13.493	4.9967	11.4153	8.079	6.8429	no	no	no
1	GRMZM2G373522			52.1443	111.476	118.273	231.059	77.3976	64.4215	137.114	126.72	no	no	no
1	GRMZM2G107901			1.6394	1.0154	0.596	2.1684	0.4493	0.5887	1.6458	1.0348	no	no	no
1	GRMZM2G472643			0.5192	0.1127	0.7996	5.3636	1.0271	0.1647	0.451	0.1373	yes	yes	yes
1	GRMZM2G543920			2.9355	2.523	5.0426	6.3847	1.7971	2.3354	5.2782	4.9115	no	no	no
1	GRMZM2G115260			0.3754	2.2295	2.3721	3.2143	1.2176	0.9404	1.283	1.9904	yes	no	no
1	GRMZM2G029850			0.1355	0.1274	0.3307	1.0454	0.4252	0.3262	0.6499	0.541	no	no	no
1	GRMZM2G030712			8.5733	9.7778	13.9219	26.0104	5.5205	5.2415	9.5463	8.2504	yes	yes	yes
1	GRMZM2G177934			5.5265	4.93	3.0222	7.4179	1.0093	1.3011	5.2197	2.0185	yes	yes	no
1	AC235544.1_FG006			0.2553	1.2312	2.0057	3.0578	1.4251	1.2942	2.1915	1.1515	no	no	no
1	GRMZM2G316474			0.8679	0.6979	3.2703	4.3481	1.0988	1.2586	2.4255	1.726	yes	no	no
1	GRMZM2G312661			2.0401	2.9261	3.147	16.1574	7.5511	2.9492	5.2323	2.4063	yes	yes	no
1	GRMZM2G007249			11.5114	11.9531	13.8774	28.1335	5.9158	5.9045	11.2076	11.7015	yes	no	no
1	GRMZM2G139193			0	1.2478	0.1174	1.9723	0.1193	0.1662	0.6491	0.4465	yes	yes	no
1	AC225179.3_FG003			0.325	1.5669	2.7875	4.2769	0.7513	0.553	1.734	1.8985	yes	no	no
1	GRMZM2G075496			0.6855	0.7721	0.9716	2.1904	0.7483	0.1256	2.2534	0.3613	yes	yes	no
1	AC225127.3_FG003			0.2785	0.2568	0.376	0.8652	0.1043	0.0196	0.2018	0.0873	yes	no	no
1	GRMZM2G059502			0.5646	0.4022	1.763	2.507	0.5972	0.5179	1.5472	0.9249	yes	no	no
1	GRMZM2G313481			0.6036	0.4221	0.3073	0.7905	0.5124	0.1633	0.2649	0.2535	yes	no	no
1	GRMZM2G036351			2.2179	0.2455	0.1849	3.8878	1.0576	0.5577	2.545	0.0575	yes	yes	yes
1	GRMZM2G146887			2.2738	4.0877	6.4554	8.468	4.3876	2.4107	5.6959	3.8994	yes	no	no
1	GRMZM2G013010			0	0	0.0856	0.6241	0	0.0021	0.0673	0.0996	no	no	no
1	GRMZM2G173597			2.9028	3.7623	1.8045	5.5971	1.6752	2.385	2.6359	1.7479	yes	yes	yes
1	GRMZM2G057374			0.3391	0.6853	1.2513	1.4346	0.2409	0.1315	0.6467	0.1613	no	no	no
1	GRMZM2G043932			1.2192	0.7963	1.0998	3.3446	2.1234	0.1599	1.2505	0.2961	yes	yes	no
1	GRMZM2G125034			0.3264	1.2001	0.3215	2.3805	0.9061	0.0889	1.4414	0.3932	yes	yes	no
1	GRMZM2G152523			0.2602	1.6503	1.4328	2.6805	1.2668	0.8324	2.1442	0.6931	no	no	no
1	GRMZM2G089698			37.7441	41.3397	64.3605	101.621	36.1816	13.0259	98.1473	35.2933	yes	no	no
1	GRMZM2G102550			0.5649	0.3739	1.0481	1.8886	0.7888	0.1764	1.049	0.8808	yes	no	no
1	AC199541.4_FG007			0.2659	0.5473	0.3532	0.8114	0.1547	0.1936	0.544	0.4028	no	no	no
1	GRMZM2G443728			12.7044	7.5837	8.3904	14.7424	10.2789	12.13	9.9735	8.2276	no	no	no
1	GRMZM2G099467			2.3418	4.5704	2.2275	9.8923	1.4716	2.5696	3.2172	3.0593	yes	yes	yes
1	GRMZM5G860810			71.6555	45.4632	78.7189	111.048	56.1602	38.8141	64.2731	65.2854	no	no	no
1	GRMZM2G059397			5.0535	3.3884	4.0434	20.7528	9.8245	1.3447	13.2341	1.8676	yes	yes	no
1	GRMZM2G142549			0.598	0.7424	0.4712	1.244	0.5255	0.0757	0.3212	0.8079	yes	no	no
1	GRMZM2G580508			6.2733	5.2826	6.0786	8.7693	3.7023	4.0173	9.1085	5.6327	no	no	no
1	GRMZM2G014934			0	0	0	0.1397	0	0	0	0	no	no	no
1	GRMZM2G170397			84.2476	71.4398	78.0918	119.586	54.31	54.8217	87.3067	69.9943	no	no	no
1	AC190636.3_FG005			0.0296	0.0858	0.0876	1.2249	0.1735	0.0614	0.2654	0.1011	yes	yes	no
1	GRMZM2G037343			0	0.1094	0.0908	0.3005	0.1017	0.0594	0.0706	0.1727	no	no	no
1	GRMZM2G042895			4.5054	0.4651	0.4294	7.5975	1.7156	1.5211	1.232	0.1046	yes	yes	yes
1	GRMZM2G341959			6.217	15.0728	12.5506	32.1561	8.7925	10.5306	17.468	17.7538	yes	no	no
1	GRMZM2G109229			1.1507	2.6645	1.2623	3.4788	1.1728	1.7347	1.0922	2.2953	no	no	no
1	GRMZM5G896728			3.83	6.9933	6.9312	10.4485	5.1687	4.8455	9.9356	7.5563	no	no	no
1	GRMZM2G426613			0.205	0.1599	0.6033	1.5663	1.2477	0.0675	1.0296	0.2896	yes	yes	no
1	GRMZM2G016290			1.3532	1.2237	0.8472	1.6701	1.1272	0.3228	0.7487	0.5676	yes	no	no
1	GRMZM2G168229			4.8156	4.9624	5.6943	13.9103	3.2551	4.0095	4.4538	5.2268	yes	yes	yes
1	GRMZM2G080887			0.2105	0.1146	0.1341	6.4054	0.4472	0.1028	0.5091	0.0074	yes	yes	no
1	GRMZM2G159119			1.1224	1.6726	2.1054	3.7348	0.8928	0.4999	1.4621	0.7665	yes	yes	no
1	AC213050.3_FG002			0.5794	0.2419	4.4882	6.32	1.0509	0.3938	4.0327	1.5192	no	no	no
1	GRMZM2G433579			9.2244	5.724	10.7054	12.442	7.8927	6.1716	11.5211	7.6413	no	no	no
1	GRMZM2G058149			0.0798	0	0	0.3013	0.1828	0.0188	0.1455	0.1171	no	no	no
1	GRMZM2G339562			0.3101	2.4729	1.9134	3.7232	1.0464	0.521	0.5735	1.1845	yes	no	no
1	GRMZM2G026151			1.867	2.393	2.236	3.9589	2.0195	0.3099	3.5097	1.0955	yes	yes	no
1	GRMZM2G305280			52.9531	45.4432	75.9136	140.219	96.4964	30.2091	134.23	53.7174	yes	yes	no
1	GRMZM2G055107			1.1755	1.7287	2.0234	3.393	1.3207	1.5125	2.3252	0.9718	no	yes	yes
1	GRMZM2G171423			8.6042	6.2034	10.732	14.6217	6.2566	7.1447	11.6985	7.027	no	no	no
1	GRMZM2G092899			1.5231	0.6951	0.7853	2.3184	0.5784	0.8163	0.5162	0.8217	no	no	no
1	GRMZM2G377904			3.1628	2.6884	4.1784	9.1824	5.8424	1.4419	9.5816	2.1836	yes	yes	no
1	GRMZM2G127478			1.6082	3.0505	5.6771	9.4518	1.5863	2.3174	6.3207	5.085	yes	no	no
1	GRMZM2G059643			23.7376	12.0451	25.5562	36.2486	16.4237	7.9998	27.3984	13.728	yes	no	no
1	GRMZM2G085856			0.2069	0.3157	0.3662	0.5541	0.1608	0.0851	0.5608	0.348	yes	no	no
1	AC190925.2_FG002			2.683	1.2101	3.1279	4.4454	1.8599	0.6553	1.0727	0.7073	yes	yes	no
1	GRMZM2G077755			1.2134	2.1263	1.5658	3.725	1.032	0.6786	3.2053	1.911	yes	no	no
1	GRMZM2G321810			0.1123	0.208	0.1978	0.2711	0.1803	0.1167	0.047	0.0606	no	no	no
1	GRMZM5G850922			0.2814	1.1325	1.3904	1.3571	0.466	0.3714	0.7014	0.7144	no	no	no
1	GRMZM2G364748			22.512	16.391	11.5728	51.985	26.9579	4.5246	24.0079	13.8846	yes	yes	no
1	GRMZM2G129357			0.7346	2.562	1.5881	3.1752	0.7547	2.143	1.7673	1.572	no	no	no
1	GRMZM2G039322			0.4131	0.9943	0.5962	2.1804	0.4611	0.4216	0.617	0.516	no	no	no
1	GRMZM2G023436			2.4169	1.3432	3.8341	6.2154	3.3218	0.9273	3.5095	1.4304	yes	yes	no
1	GRMZM2G079785			0.6797	0.6088	1.2643	1.4886	0.2404	0.3599	1.1184	0.4438	no	no	no
1	GRMZM2G451861			0.0646	0.0891	0.0496	0.1312	0.0321	0.0089	0.0392	0.0188	no	no	no
1	GRMZM2G097137			0.5481	0.4409	1.3122	2.8568	0.8944	0.6299	1.7968	1.0652	yes	no	no
1	GRMZM2G030197			0.16	0.6716	0.4169	0.767	0.1222	0.1156	0.3786	0.1626	no	no	no
1	GRMZM2G322641			30.8039	27.003	30.7897	51.18	18.1342	20.8076	54.8748	28.1669	no	no	no
1	GRMZM5G891098			0.2019	0.9432	0.522	1.3955	0.7764	0.6597	0.3682	0.8603	no	no	no
1	GRMZM2G114186			0.1445	0.2295	0.6983	1.8761	0.3108	0.1177	0.8565	0.3502	yes	yes	no
1	GRMZM2G119550			0	0.3957	3.0793	5.7599	2.8575	0.5692	5.3783	1.0017	yes	yes	yes
1	GRMZM2G307437			0.617	0.1645	0.2175	0.7712	0.4517	0.4028	0.6866	0.274	no	no	no
1	GRMZM5G814481			0.8372	0.8561	1.6927	2.3137	0.8349	0.4616	0.9528	0.8324	no	no	no
1	GRMZM2G094990			2.5948	4.5192	5.6295	11.5876	2.8257	6.0688	4.6777	5.7002	no	no	no
1	GRMZM2G496319			70.6083	164.005	80.2797	173.84	66.6056	85.1681	170.808	116.306	no	no	no
1	GRMZM2G004060			5.9186	29.0939	10.1802	51.2065	6.5153	3.2525	9.9377	7.9483	yes	yes	yes
1	GRMZM5G838592			2.6805	2.9322	2.4378	4.9027	2.4284	3.2702	0.9118	1.4717	no	no	no
1	GRMZM2G042477			0.248	1.4541	1.9323	2.568	2.0341	1.0998	2.4108	1.5463	no	no	no
1	GRMZM2G368491			3.6023	8.8287	10.7929	12.83	3.6017	2.5838	8.5692	7.8351	yes	no	no
1	GRMZM2G360624			0.8622	1.65	2.4723	4.6586	1.842	1.6626	4.1063	2.8792	no	no	no
1	AC199703.3_FG003			0.4425	0.1769	0.2735	0.7213	0.0924	0.094	0.312	0.0789	no	yes	no
1	GRMZM2G038916			0.2344	1.0729	0.8656	1.2623	0.5607	0.5564	0.8413	0.5306	no	no	no
1	GRMZM2G128248			1.4562	2.5183	2.3459	3.6782	1.0239	1.474	2.8892	1.7005	no	no	no
1	GRMZM2G304712			3.8878	6.0074	5.0501	12.4102	2.237	1.3301	7.2298	3.5132	yes	yes	no
1	GRMZM2G377215	rth3	roothair defective3	19.4166	21.1666	13.6161	29.7433	20.9461	11.3225	27.4078	19.8556	yes	no	yes
1	GRMZM2G076631			0.5292	1.5547	2.8362	3.5627	1.1214	0.977	1.9558	0.869	yes	yes	no
1	GRMZM2G389510			0.1151	4.293	4.4064	5.677	2.5854	2.3598	5.8529	3.6032	no	no	no
1	GRMZM2G392125			4.1974	2.2553	6.7661	40.7835	16.0357	2.0378	14.4994	5.6858	yes	yes	no
1	GRMZM5G831200			0.905	2.4886	1.2999	3.442	0.388	0.4418	1.2324	0.7925	yes	yes	no
1	GRMZM2G024211			15.2594	10.7131	19.4594	24.8011	9.6075	9.9186	17.8358	9.4775	yes	yes	no
1	AC211652.4_FG001			9.9474	10.7365	19.9977	30.7272	10.986	8.9897	23.6082	8.6898	yes	yes	no
1	GRMZM2G017244			5.8884	3.9186	5.5782	7.8798	3.5465	2.9769	5.2239	3.6897	no	no	no
1	GRMZM2G336533			2.1414	0.586	2.6048	5.8266	3.9652	3.4623	2.619	0.8464	no	yes	no
1	GRMZM2G009019			19.7525	19.5367	25.0143	33.0647	10.5745	14.773	14.9412	15.3631	yes	yes	yes
1	GRMZM5G841101			2.7362	2.8774	4.31	5.5049	1.3586	2.2863	2.8379	1.2375	no	yes	no
1	GRMZM2G377563			0.0378	0.186	0.106	0.2457	0	0.0812	0.1683	0.1918	no	no	no
1	GRMZM2G151319			5.8628	11.0995	8.635	12.8176	4.3323	4.259	7.9132	5.9203	yes	yes	yes
1	GRMZM5G819464			2.5985	3.0839	5.7178	11.403	8.1959	0.2834	11.0076	0.8814	yes	yes	no
1	AC186845.4_FG009			1.3288	1.9905	11.5359	22.9956	5.6705	0.5348	2.3737	2.7096	yes	yes	no
1	GRMZM2G128322			1.3115	4.4379	3.706	5.8463	2.3414	3.9233	4.9669	4.0329	no	no	no
1	GRMZM2G172053			0.2268	0.3398	0.5511	1.1354	0.3885	0.2404	0.576	0.1695	no	no	no
1	GRMZM2G070252			0.5641	1.3152	0.536	2.0542	0.6526	0.8206	0.4432	0.1258	no	yes	yes
1	GRMZM2G046297			0.1946	0.4887	0.3758	0.7745	0.1413	0.1756	0.3022	0.2521	yes	no	no
1	GRMZM2G180011			0.4283	1.0092	1.0778	1.3437	0.2163	0.63	0.7719	0.7635	no	no	no
1	GRMZM2G381404			1.7526	1.9018	2.4811	16.964	7.5618	1.074	4.3077	2.0358	yes	yes	no
1	GRMZM2G059845			13.9096	8.9996	9.2836	22.4355	11.057	15.2857	11.0713	13.5862	no	no	no
1	GRMZM2G130173			1.3999	25.1343	8.8473	31.3609	3.96	2.9835	7.2886	7.0186	yes	yes	yes
1	GRMZM2G065928			0.4291	0.9326	2.0558	4.1415	3.1352	1.0064	2.5076	1.3126	yes	yes	no
1	GRMZM2G401331			16.0684	22.141	52.2819	56.2697	11.9682	12.4704	31.0182	19.55	yes	yes	no
1	GRMZM2G029475			0.754	1.0192	1.3061	2.5801	1.4491	0.7631	1.4245	1.6622	no	no	no
1	GRMZM2G148167			0.4684	0.3376	0.3341	1.5728	0.8161	0.9731	1.3749	0.626	no	no	no
1	GRMZM2G107306			0.6241	0.8374	0.144	1.142	0.1551	0.3914	0.3576	0.6247	no	no	no
1	GRMZM5G887276			4.3353	2.0363	6.291	9.7177	4.8103	3.8846	4.6969	4.2997	yes	no	no
1	GRMZM2G475980			5.2508	4.5506	4.5773	6.8763	2.8502	1.8102	4.9423	2.7282	yes	no	no
1	GRMZM2G057352			0.9238	0.9225	1.9228	2.4337	1.0373	0.487	1.5858	0.3776	yes	yes	no
1	GRMZM2G174396			4.5624	1.3657	2.2162	11.9834	7.5291	0.5137	2.7723	0.2192	yes	yes	yes
1	GRMZM2G392918			10.4795	5.0404	13.3201	20.0542	8.0802	8.8625	15.1505	9.1437	no	no	no
1	GRMZM2G139815			1.7902	2.1155	5.1612	13.2405	7.1182	3.7418	7.0432	4.9305	yes	yes	no
1	GRMZM2G069511			0.4674	0.2435	1.1632	5.0106	1.8699	0.2973	1.8838	0.1011	yes	yes	no
1	GRMZM2G027673			0	0	0	0.0459	0	0	0	0	yes	yes	yes
1	GRMZM2G037865			8.3548	20.7375	14.5468	26.4411	8.1192	10.1651	9.4218	9.8165	yes	yes	no
1	GRMZM2G045664			23.7099	26.0281	77.7389	98.6567	83.4811	31.7222	78.4801	39.5721	yes	no	no
1	GRMZM2G335052			1.4204	2.3655	3.0625	7.8555	1.8235	1.6807	3.4835	3.6008	yes	no	no
1	GRMZM2G474651			27.3885	33.8286	43.7095	51.2918	21.9912	17.0491	29.5948	23.2905	yes	yes	no
1	GRMZM2G024799			0.1572	0.3695	0.388	0.6257	0.1208	0.1206	0.3297	0.3733	no	no	no
1	GRMZM5G847216			0.475	2.0579	1.1295	3.2429	0.9706	0.4669	1.3902	0.8882	yes	no	no
1	GRMZM2G088747			0.4577	0.2566	1.3186	2.2825	0.9633	0.2045	1.0266	0.3086	no	no	no
1	GRMZM2G060837			14.8213	14.3404	20.1289	32.9963	13.6255	4.0486	19.8491	11.4683	yes	yes	no
1	GRMZM2G436404			3.8416	5.2186	4.7914	7.4504	2.8796	1.5925	4.7601	3.0944	yes	no	no
1	GRMZM5G881172			2.0902	0.367	1.5501	2.4707	1.4281	1.3953	1.6949	1.8646	no	no	no
1	GRMZM2G080959			1.421	2.6455	6.7846	13.4001	7.9049	1.6112	10.2436	2.0968	yes	yes	no
1	GRMZM2G180920			3.7701	6.3979	6.9466	14.7477	5.1255	3.0414	12.1152	6.0634	yes	no	no
1	GRMZM2G100176			1.9356	4.778	2.9448	8.0413	2.5044	3.2894	2.9403	4.8992	no	no	no
1	GRMZM2G414537			0.4903	1.6776	1.0625	1.8617	0.6179	0.6744	0.65	0.431	no	yes	no
1	GRMZM2G367170			0.4673	1.0154	1.4562	2.2005	1.4958	1.0704	0.5893	1.289	no	no	no
1	GRMZM2G095899			5.3542	0.8174	2.4783	7.5648	3.3731	3.4494	5.4422	5.4693	no	no	no
1	GRMZM2G303530			43.5827	24.9842	51.7194	74.9125	21.4677	37.0673	32.7405	40.0239	no	no	no
1	GRMZM2G119642			1.9793	4.0206	9.0225	10.4365	4.6825	4.5534	8.2648	7.2836	no	no	no
1	GRMZM2G419836			2.5283	3.2823	2.7149	7.367	2.5008	3.7304	6.7471	4.4958	no	no	no
1	GRMZM2G158721			0.0362	0.1273	0.1261	0.1803	0.2262	0.0429	0.125	0.0535	no	no	no
1	GRMZM2G162814			6.262	10.5959	10.0161	17.3813	6.9755	7.2116	8.9961	5.9809	yes	yes	no
1	AC149818.2_FG007			2.5613	2.2864	3.2226	6.0069	2.2811	2.2559	4.9012	3.5026	no	no	no
1	GRMZM2G045117			0.4595	0.4602	0.7624	1.1466	0.9493	0.3947	0.9678	0.7336	no	no	no
1	GRMZM2G390436			0.1921	0.545	0.7918	1.0173	0.0406	0.057	0.3392	0.2839	yes	no	no
1	GRMZM2G036120			0.5905	1.2414	1.7523	2.6866	0.6352	0.4685	1.5633	0.8513	yes	no	no
1	GRMZM2G049185			33.7382	17.6813	21.1326	41.189	40.6745	5.9925	35.9163	18.4571	yes	no	no
1	GRMZM2G014854			64.7774	45.8828	44.9544	75.6883	38.3329	38.4747	63.2092	46.8718	no	no	no
1	GRMZM2G079782			18.8562	17.4359	24.6203	31.6715	9.8563	7.2452	23.213	8.6196	yes	yes	yes
1	GRMZM2G050286			1.3609	15.1877	7.7944	29.3886	6.3269	5.4718	7.9419	9.4915	yes	yes	yes
1	GRMZM2G412441			249.066	161.657	209.019	302.778	114.997	111.876	171.705	186.556	no	no	no
1	AC199961.4_FG001			0.0145	0.0461	0.0547	0.0527	0.0167	0.0294	0	0	no	yes	no
1	GRMZM2G165633			11.0107	11.4556	9.2746	18.8119	4.3385	4.4423	8.8193	7.5251	yes	no	no
1	GRMZM2G350428			2.6988	2.6607	2.4678	5.8271	2.0232	2.5287	3.7321	4.3897	no	no	no
1	GRMZM2G087243			20.1284	26.186	28.0241	36.3581	16.299	12.5638	20.5522	17.4693	yes	yes	no
1	GRMZM2G166944			742.738	612.76	1235.24	1447.27	990.25	551.957	855.097	822.574	yes	yes	yes
1	AC203966.5_FG005			7.4196	18.1157	25.8653	58.8542	22.6396	18.8666	48.5702	27.8989	no	no	no
1	GRMZM2G368662			0.605	0.5842	0.9781	1.7922	0.5656	0.762	1.9182	1.0553	no	no	no
1	GRMZM2G428555			11.5713	21.1109	22.084	36.0205	9.076	4.9808	27.4607	13.9264	yes	yes	no
1	GRMZM2G041352			1.215	1.5678	0.9814	2.5862	0.874	1.2256	1.2709	1.6739	no	no	no
1	GRMZM2G167591			22.4278	17.2524	30.7577	39.4012	17.3263	13.9569	26.3392	19.3709	yes	no	no
1	GRMZM2G482256			0.2517	0.2671	0.1622	0.4545	0.099	0.0117	0	0.0299	no	no	no
1	GRMZM2G479581			0	0.3193	0.221	0.8647	0.3398	0.233	0.7866	0.2508	no	no	no
1	GRMZM2G147544			1.8734	0.8591	2.6331	6.0087	4.499	0.9424	2.3388	1.4441	yes	yes	no
1	GRMZM2G176759			6.5303	4.8998	5.7182	8.2239	1.9971	3.5043	6.1675	4.4974	no	no	no
1	GRMZM2G413006			16.3827	9.5446	39.3865	141.06	54.8383	16.1054	71.2478	63.4099	yes	no	no
1	GRMZM2G300080			6.2726	2.6276	5.7131	8.9665	2.2623	5.9575	4.8572	4.4396	no	no	no
1	GRMZM2G419938			4.2062	10.6958	9.2922	14.5676	4.5862	6.5982	10.5345	6.2058	no	no	no
1	GRMZM2G112366			62.6992	48.7857	92.3283	117.622	57.5518	55.1534	83.4055	66.4116	no	no	no
1	GRMZM2G077562			0.6236	1.4827	1.473	3.6505	0.6901	0.6996	0.969	1.394	yes	no	no
1	GRMZM2G087804	g2	golden plant2	9.3031	4.0648	11.6986	16.9251	7.3337	8.4484	13.1187	11.7865	yes	no	yes
1	GRMZM2G136306			2.2594	1.8167	1.5491	4.1737	1.26	2.1947	1.6303	1.9151	no	no	no
1	GRMZM2G472453			2.1718	1.1707	3.3798	5.3789	1.2686	0.6552	0.7032	0.9639	yes	yes	no
1	AC213432.2_FG004			6.3087	2.205	9.9067	15.0926	3.9622	3.7292	7.0241	7.2045	yes	no	no
1	GRMZM2G114675			215.038	140.757	275.121	340.021	148.433	111.866	185.082	162.128	no	no	no
1	GRMZM2G134703			6.9749	5.6517	4.9405	9.7908	4.5931	3.218	5.6325	6.1824	yes	no	no
1	AC204050.4_FG006			0.2907	0	1.6304	3.4514	4.0206	0.0295	2.1202	0.0129	yes	yes	no
1	GRMZM2G168115			0.8783	0.3711	0.5478	2.3998	1.1146	0.1845	1.7193	0.0935	yes	yes	no
1	GRMZM2G069523			3.9664	14.4288	6.8853	19.2107	4.1082	3.1032	5.9055	5.9232	yes	yes	yes
1	GRMZM5G874756			23.0758	20.4608	24.6106	36.714	20.2205	16.7711	30.2306	22.5712	no	no	no
1	GRMZM2G131575			1.8744	3.1317	2.0205	5.1463	2.2126	0.9919	2.6201	1.4259	yes	yes	no
1	GRMZM2G157197			1.7836	2.3805	4.2673	6.2968	0.9149	0.8053	4.3394	2.9083	yes	yes	yes
1	GRMZM2G029065			0.1643	0.0796	0.6253	0.8456	0.3086	0.2536	0.6071	0.3393	no	no	no
1	GRMZM2G094017			0.3071	0.2646	0.119	0.6257	0.0439	0.1434	0.4228	0.1056	no	no	no
1	GRMZM5G879527			4.3739	4.511	4.4641	6.0862	2.2895	2.2374	3.4997	2.4405	yes	yes	no
1	GRMZM2G133394			5.9974	5.5823	16.7431	20.7383	7.7607	3.3017	16.7114	7.5927	yes	yes	no
1	GRMZM2G146463			29.5397	15.3463	35.9571	57.1953	21.1311	34.0171	27.2237	30.2448	no	no	no
1	GRMZM2G139994			0.3421	0.985	1.1114	1.9997	0.559	0.5407	1.2728	1.2304	yes	no	no
1	GRMZM2G012340			0.1475	0.5797	1.0863	1.6569	0.5045	0.6771	0.9139	0.5554	no	no	no
1	GRMZM2G320506			1.0121	1.7021	1.9953	5.9751	2.1511	1.3605	2.4025	1.9275	yes	yes	no
1	GRMZM2G070825			0.5368	0.2724	0.2962	1.7456	0.9819	0.4261	0.706	1.0297	yes	no	no
1	GRMZM2G005207			0.6608	0.6987	1.6266	3.2523	0.6336	1.5158	1.0274	0.7496	no	yes	no
1	GRMZM2G165919			0.8241	1.2269	0.3071	1.8049	0.3939	0.0596	0.6332	0.6294	yes	no	no
1	GRMZM2G073693			3.0168	2.0922	3.1657	4.9821	2.0697	1.1887	3.3694	1.8068	yes	yes	no
1	GRMZM5G879872			0.63	0.3901	1.5818	1.8857	0.7607	0.1092	1.0258	0.2746	no	no	no
1	GRMZM2G080191			0.2444	0.3503	1.5889	3.0067	1.393	0.4286	0.3439	0.5456	no	no	no
1	GRMZM2G466229			2.4266	2.2813	3.3605	4.7071	1.3368	1.6207	4.1555	2.3847	no	no	no
1	GRMZM5G872120			1.0786	1.1245	2.946	3.7092	2.2237	1.0488	2.5669	1.9304	no	no	no
1	GRMZM2G019090			0	0	0	0.1501	0	0	0	0	no	no	no
1	GRMZM2G469304			16.5251	23.4364	25.2275	30.6003	13.8282	19.7156	24.4829	19.4698	no	no	no
1	GRMZM2G036427			7.2938	10.6731	13.8667	17.3228	6.2331	8.3945	11.9049	10.1714	no	no	no
1	GRMZM2G111697			0.5654	0.2735	1.0927	2.6149	0.7041	0.4742	0.8909	0.8276	yes	no	no
1	GRMZM2G175134			1.1703	4.2331	3.7456	10.0547	1.4449	1.6684	3.1956	3.3939	yes	yes	no
1	GRMZM2G024331			1.0596	0.5408	3.5152	5.6576	4.1506	0.4187	4.2812	1.6505	yes	yes	no
1	GRMZM2G009009			1.811	3.2961	1.9637	4.2678	1.7247	0.4987	1.9966	1.0243	yes	yes	no
1	GRMZM2G119766			7.1006	15.1797	15.9593	30.7447	8.5243	1.1822	25.2361	7.1918	yes	yes	yes
1	GRMZM2G145950			5.6649	8.2437	7.7276	12.7147	3.7636	7.5846	7.402	9.8501	no	no	no
1	GRMZM2G318180			3.4541	1.1159	9.2717	15.9821	5.3484	0.4348	11.9424	1.7671	yes	yes	no
1	AC187090.3_FG011			7.269	3.6984	6.4051	11.0378	3.689	4.5836	3.7603	5.4348	no	no	no
1	GRMZM2G155911			0.2616	1.0635	0.7675	2.1601	0.4378	0.9173	1.5557	1.6121	no	no	no
1	GRMZM2G165177			0.0645	0.062	0.034	0.9469	0.5109	0.0409	0.267	0.0237	yes	yes	no
1	GRMZM2G119783			0.9682	1.0729	0.9021	3.031	0.9018	0.2011	0.3883	0.4385	yes	yes	no
1	GRMZM2G046290			5.4857	1.6046	8.6339	15.795	5.8922	7.8558	7.8874	8.5101	no	no	no
1	GRMZM2G121715			6.0078	7.5688	9.9391	10.4769	3.7379	3.0582	7.2734	4.5797	yes	no	no
1	GRMZM2G158636			0.7454	1.23	0.9458	2.1771	0.9621	0.6787	2.0173	0.9483	no	no	no
1	GRMZM2G050305			5.0632	3.6619	5.7514	9.838	2.5078	4.7544	5.0556	5.2286	no	no	no
1	GRMZM2G098676			7.8926	3.9438	5.6811	11.5953	4.8773	2.4469	6.8105	4.475	yes	no	no
1	GRMZM2G026614			1.4712	1.1081	1.3343	2.1294	2.2603	0.6055	1.3622	0.5275	yes	no	no
1	AC166636.1_FG007			18.0456	16.6121	20.9963	28.7985	6.2087	6.3433	13.8535	8.8749	yes	yes	no
1	GRMZM5G878490			3.51	3.1889	4.7575	6.7513	2.4435	3.3739	5.8286	2.7536	no	no	no
1	GRMZM2G074811			6.0488	11.3367	12.693	28.7235	7.5965	7.4729	7.3165	8.4211	yes	yes	no
1	GRMZM2G059565			3.1809	3.082	4.4993	5.1961	2.0599	1.1786	4.6606	3.2861	yes	no	no
1	GRMZM5G800586			3.6663	6.8244	4.4682	10.6889	1.7847	1.0846	5.8835	3.9934	yes	no	no
1	GRMZM2G132028			0.0523	0	0	1.0695	0.0126	0.0092	0.0167	0.0931	no	no	no
1	GRMZM2G061408			4.6595	8.4914	7.2454	23.495	16.8852	2.402	16.6868	3.0064	yes	yes	no
1	GRMZM5G899031			2.0014	0.2456	1.8212	3.5955	0.2979	0.0642	0.5586	0.2319	yes	yes	no
1	GRMZM2G026147			3.7512	6.1954	9.6482	11.7561	4.1994	1.7491	7.8546	1.6561	yes	yes	no
1	GRMZM2G036940			0.0787	0.2872	0.2108	0.6493	0.0342	0.0224	0.1194	0.1221	no	no	no
1	GRMZM2G020898			8.6061	8.1768	13.1111	19.4108	7.0471	5.18	16.4606	8.7106	yes	no	no
1	GRMZM2G353785			5.6649	5.5343	8.0157	12.0156	4.5369	4.2424	11.9204	6.37	no	no	no
1	GRMZM2G052467			1.1523	2.2727	1.6354	3.4843	1.3539	0.1473	1.5793	0.9962	yes	yes	no
1	GRMZM2G036752			45.3343	47.8478	56.8279	81.853	33.919	16.1369	58.0749	29.3287	yes	yes	no
1	GRMZM2G004128			2.4704	1.598	3.409	5.4993	2.0258	1.0077	3.3909	2.0395	yes	no	no
1	GRMZM2G162659			0.7073	0.2963	0.4435	2.0415	1.9552	0.3651	0.5152	0.3103	no	no	no
1	GRMZM2G046755			1.3079	1.722	1.2034	2.3825	0.4303	0.7605	0.9184	1.3533	no	no	no
1	GRMZM2G444743			2.585	1.6059	5.0867	8.7541	1.9227	0.7858	5.3359	0.7767	yes	yes	yes
1	GRMZM2G468439			3.2977	3.3601	5.4493	10.8224	3.7597	5.3861	3.7653	2.7	no	yes	no
1	GRMZM2G071100			2.9319	6.8865	1.2173	9.7581	2.1988	1.9177	4.2159	4.397	yes	no	no
1	GRMZM2G112530			4.7351	5.6978	3.8327	7.4544	2.4194	3.2901	6.5814	3.6494	no	no	no
1	GRMZM2G025954			0.2894	0.254	0.3028	0.4055	0.0738	0.1482	0.173	0.3232	no	no	no
1	GRMZM2G343236			0.8722	0.9737	3.9241	6.9061	0.3826	1.1465	5.6908	5.3732	yes	no	no
1	GRMZM2G115839			5.5461	2.4918	5.3163	10.7796	4.0265	0.2589	4.2279	0.8348	yes	yes	no
1	GRMZM2G029690			0.7332	0.8425	1.2179	2.0255	0.4725	0.4925	1.2546	0.6365	no	no	no
1	GRMZM2G169360			7.3309	0.5392	2.3159	10.723	4.6967	2.867	3.7344	1.3426	no	no	no
1	GRMZM2G486757			0.341	0.3125	1.1365	1.349	0.4641	0.2118	0.4296	0.2875	no	no	no
1	GRMZM2G060544			5.386	3.6646	4.5388	14.1765	2.6201	5.4398	9.8413	2.2575	no	yes	no
1	GRMZM2G007867			3.5469	1.9082	5.7904	7.6282	3.3934	3.3877	3.0295	3.1223	yes	yes	no
1	GRMZM2G090010			3.1676	3.7153	5.3852	6.258	1.0584	1.617	2.1537	1.603	yes	yes	yes
1	GRMZM2G010740			2.1053	3.2291	2.6075	11.0119	2.019	3.7848	5.6756	5.3086	no	no	yes
1	GRMZM2G007256			1.0627	2.891	1.234	4.9016	2.074	1.1423	2.8321	1.8486	yes	yes	no
1	GRMZM2G163418			0.4016	1.2045	1.1849	2.842	1.2865	0.4252	1.3394	0.7154	yes	yes	no
1	GRMZM5G890865			0.2734	0.202	0	0.5299	0.0981	0.2161	0	0.0697	no	no	no
1	GRMZM2G067235			4.0159	5.1091	8.4508	9.6196	3.811	2.3488	7.8881	4.6711	yes	no	no
1	GRMZM2G103617			19.3615	4.9013	7.1939	25.795	14.7202	12.1329	8.9763	13.8849	no	no	no
1	GRMZM2G011085			14.6754	16.3421	27.162	33.9003	16.9332	6.7855	29.43	14.859	yes	no	no
1	GRMZM2G022931			5.3098	1.4873	6.0636	11.6939	4.9914	1.3206	9.7112	4.1764	yes	no	no
1	GRMZM2G091201			0.2266	0.2219	0.658	1.0498	0.405	0.068	0.3286	0.4579	no	no	yes
1	GRMZM2G116461			0.9844	0.9596	0.4233	1.5089	0.9382	0.8419	0.6522	0.4389	no	no	no
1	GRMZM2G000254			3.8018	6.235	9.8251	10.3515	3.8072	4.7572	8.5644	5.7663	no	no	no
1	GRMZM2G056629			8.7762	8.5261	10.1741	19.0289	8.0338	3.0931	7.8938	2.9586	yes	yes	no
1	GRMZM2G136663			0.6802	0.1982	7.6086	23.7629	17.3289	1.3473	6.0467	1.0867	yes	yes	yes
1	AC212565.3_FG001			710.263	767.918	873.502	1175.7	647.572	681.464	1225.75	855.551	yes	no	no
1	AC233953.1_FG004			1.2708	3.7186	1.696	7.6832	1.6834	2.4242	3.3978	3.0575	no	no	no
1	AC202549.3_FG008			1.8451	1.7206	0.7656	3.5079	0.9649	1.6821	0.5112	2.1282	no	no	no
1	GRMZM2G172485			1.0497	0.759	1.0621	2.573	1.2557	0.5531	1.1591	0.5538	yes	yes	no
1	GRMZM2G008359			12.0256	17.7654	13.9986	20.4228	10.3119	7.5282	9.9146	6.8009	no	no	no
1	GRMZM2G173882			1.8055	3.4005	2.9937	4.2022	0.7949	1.796	2.8569	1.8298	no	no	no
1	AC225718.2_FG009			0.3141	1.3993	1.9651	28.9019	4.9618	6.3986	15.3861	4.9384	yes	yes	no
1	GRMZM2G125012			5.4084	7.3586	14.2712	20.3137	10.3014	7.9797	13.1161	9.4441	no	no	no
1	GRMZM2G417009			0.625	3.0391	2.6501	3.0966	1.8099	2.1563	2.4006	1.9541	no	no	no
1	GRMZM2G419290			6.2483	2.5298	6.2302	7.3648	4.3431	5.3113	6.8003	5.7069	no	no	no
1	GRMZM2G071987			5.8722	4.4224	4.2512	8.6226	3.3449	6.0389	4.6126	4.9736	no	no	no
1	GRMZM2G534288			0.1056	0.2006	0.3474	0.7297	0.4433	0.0137	0.2244	0.1215	yes	no	no
1	GRMZM2G110412			0.2152	0.4575	0.7613	0.9237	0.356	0.466	0.3739	0.3247	no	no	no
1	GRMZM2G079619			0.1555	0.1091	0.2613	0.4003	0.1153	0.1477	0.2163	0.362	no	no	no
1	GRMZM2G349185			0.1236	0.1154	0.36	1.0046	0.2362	0.2434	0.4729	0.3577	no	no	no
1	GRMZM2G042488			0.1935	1.4061	1.0813	6.2668	0.2168	0.0573	0.1073	0.7869	yes	yes	yes
1	GRMZM2G086841			2.3352	1.0055	2.1143	3.1659	3.0318	1.0906	2.7076	0.7503	yes	yes	yes
1	GRMZM2G396767			4.4331	1.872	1.6092	5.371	1.9441	3.0928	3.0363	2.1932	no	no	no
1	GRMZM2G076584			1.6536	0.584	1.1145	6.9747	2.5873	3.7756	1.4161	0.4229	no	yes	no
1	GRMZM5G817182			0.8632	1.3678	1.5829	2.4445	0.6787	0.5557	0.7742	0.2924	yes	yes	no
1	GRMZM2G328341			0.6924	0.6311	0.4469	1.2976	0.6497	0.7633	1.3549	0.9732	no	no	no
1	GRMZM2G066345			0.4481	0.7485	1.061	1.3233	0.3986	0.2971	1.0049	0.2996	yes	yes	no
1	GRMZM2G058081			0.4144	0.7016	1.301	2.6292	0.3419	0.2019	0.4524	0.6998	no	no	no
1	GRMZM2G424981			0.14	0.1896	0.1441	0.2613	0.0988	0.0221	0.0456	0.0386	no	no	no
1	GRMZM2G000743	knox3	knotted related homeobox3	164.882	139.068	138.321	199.021	104.251	80.2408	169.805	134.274	no	no	no
1	GRMZM2G312922			0	0.0663	0.0321	0.0947	0	0	0.0571	0.018	yes	yes	no
1	GRMZM2G071272			14.974	26.1467	19.985	31.1643	12.4175	13.8212	24.8077	16.9242	no	no	no
1	GRMZM2G140153			0.3819	0.6806	1.2193	1.3182	0.5166	0.4615	1.0725	0.5893	no	no	no
1	GRMZM2G106819			12.311	3.9271	22.1017	40.0318	31.6994	10.3247	12.9617	5.7053	yes	yes	no
1	GRMZM2G044591			10.727	14.6942	22.8965	24.7333	7.5513	10.2027	12.7	10.1471	no	yes	yes
1	AC187843.3_FG006			0.1002	1.3001	1.5628	2.9536	0.0555	0.5643	0.2161	0.487	yes	yes	no
1	GRMZM2G165133			0.1709	0	0.2965	1.3674	0.0872	0.1137	0.6272	0.294	no	no	no
1	GRMZM2G056303			0.4189	0.2394	1.7744	2.2977	0.6585	0.171	1.4885	0.6423	yes	yes	no
1	GRMZM2G083195			29.0263	17.1711	21.0946	32.8364	17.9044	20.8355	21.0323	20.5872	no	no	no
1	GRMZM2G434549			0.1492	1.2626	1.4604	1.9915	0.5659	0.8187	1.2875	0.7844	no	no	no
1	GRMZM2G085705			0.2026	0.4516	0.9072	2.5969	1.2705	0.4013	1.2131	0.7854	yes	no	no
1	GRMZM2G358537			0.5586	1.7486	2.4074	3.5391	1.5835	1.068	1.9825	2.0323	yes	no	no
1	GRMZM2G436707			0	0	0.0651	0.0717	0	0.0299	0.016	0.0021	yes	yes	no
1	GRMZM2G396835			2.068	3.0441	10.9409	16.8563	5.0544	2.9966	7.7768	4.5149	yes	yes	no
1	GRMZM2G107003			413.224	300.379	778.851	905.875	472.817	417.522	688.133	479.054	yes	yes	no
1	GRMZM2G369472			0.4477	0.1796	0.2155	4.6795	0.5941	0.6224	0.5141	0.0222	yes	yes	no
1	GRMZM2G152796			0.5559	0.4108	0.8819	1.8757	0.9537	0.265	0.6321	0.6679	yes	no	no
1	GRMZM2G126734			2.4265	4.1122	4.2675	10.6923	5.3144	3.0301	5.8721	7.0288	no	no	no
1	GRMZM2G060183			27.9729	13.5355	15.4764	31.5855	11.3207	18.3108	20.5602	22.7429	no	no	yes
1	GRMZM2G079381			1.6875	2.1203	15.56	18.7626	9.1212	4.6133	10.4993	4.878	yes	yes	yes
1	GRMZM2G045178			32.9137	38.0155	27.5907	52.6386	41.29	24.3088	47.2669	27.6261	yes	no	no
1	GRMZM2G098279			0	0.2501	0.4297	1.0845	0.0502	0.0932	0.1076	0.2191	no	no	no
1	GRMZM5G836424			0.1176	0.4948	0.3419	0.9131	0.6719	0.4829	0.5528	0.5392	no	no	no
1	GRMZM2G148864			0.3817	1.0596	1.0067	1.5883	0.5091	0.9942	1.0127	0.5702	no	no	no
1	GRMZM2G094768			0.8076	0.9232	0.9325	1.7095	0.9169	0.1868	1.2282	0.5815	yes	no	no
1	GRMZM2G478553			0.6682	0.4283	0.2491	1.1177	0.4822	0.0328	0.3479	0.0771	yes	yes	no
1	GRMZM2G330565			2.1054	1.2356	1.8378	3.1995	0.7351	1.8003	2.6371	1.4795	no	no	no
1	GRMZM2G422295			1.0521	1.3019	1.0339	1.7685	0.5022	0.0725	0.8421	0.1361	no	no	no
1	GRMZM2G387603			0.1708	0.2472	0.7527	0.8312	0.594	0.337	0.1221	0.1438	no	no	no
1	GRMZM2G129298			0.6039	0.5078	1.0305	1.5587	0.6111	0.5905	0.3578	0.6081	no	no	no
1	GRMZM2G124872			0.2769	0.3506	0.1822	0.4654	0.1531	0.1743	0.3445	0.3373	no	no	no
1	GRMZM2G159953			24.813	31.4876	24.497	43.8075	18.3043	19.9098	31.4839	28.7385	no	no	no
1	AC149810.2_FG008			0.1603	0.1225	0.2895	0.4839	0.3759	0.0861	0.4504	0.2064	no	no	no
1	GRMZM5G874448			0	0	0	0.0415	0	0	0	0	yes	yes	yes
1	GRMZM2G320167			0.096	0.4125	0.4938	0.7869	0.3262	0.1523	0.1812	0.1562	no	no	no
1	GRMZM5G810727			0.2129	0.0746	0.6055	1.0908	0.4	0.4682	0.6663	0.6488	no	no	no
1	GRMZM2G129291			4.2883	4.6954	5.4057	6.5771	3.0947	2.0975	4.5423	3.9738	yes	no	no
1	GRMZM2G406119			0.9565	1.5404	0.6512	2.1235	0.3131	0.1377	0.3574	0.2608	yes	yes	no
1	GRMZM2G099363			3.2583	5.4795	3.6151	8.3207	5.2162	1.9225	5.2347	2.6806	yes	yes	no
1	GRMZM2G015049			7.6106	9.5759	9.3816	17.3591	4.0686	5.7674	14.1387	7.7338	no	no	no
1	GRMZM2G098696			0.2554	1.0439	1.6337	2.2181	0.746	0.1019	1.1438	0.1751	yes	yes	no
1	AC195331.3_FG008			56.1782	62.8733	79.9546	106.475	35.5351	33.1057	101.562	94.3123	yes	no	no
1	GRMZM2G112284			5.7248	5.3912	9.1961	16.2018	6.4722	2.7437	14.1953	5.1531	yes	yes	no
1	GRMZM2G141376			36.3059	16.325	26.1787	49.7835	17.2485	8.4131	34.252	26.694	yes	no	no
1	GRMZM2G424804			0.3162	0	0.0727	0.4539	0.3073	0.2732	0.2286	0.019	no	no	no
1	GRMZM2G163136			4.4345	3.7337	4.6197	10.2993	2.2659	2.9513	3.6656	3.3673	yes	yes	no
1	GRMZM2G417454			7.055	6.6833	11.7474	18.4502	5.2169	5.5229	13.2356	7.2452	yes	no	no
1	GRMZM2G098517			2.0402	1.791	1.5886	5.7417	4.7909	3.2196	2.7136	2.4768	no	no	no
1	GRMZM2G439951			0.0989	0.7769	0.0501	1.0893	0.0136	0.1552	0.0545	0.6275	yes	no	no
1	GRMZM2G017110			4.4567	18.3244	19.752	23.0136	19.6894	17.4098	19.4005	14.6816	no	no	no
1	GRMZM2G044736			5.7803	6.8407	4.8031	10.1406	2.614	0.9653	5.0421	3.1356	yes	yes	no
1	GRMZM2G396248			2.1047	0.3708	2.4633	3.3441	1.264	0.1678	1.5025	0.4019	yes	yes	no
1	GRMZM2G104843	ts1	tassel seed1	6.2636	3.8695	2.0833	11.5447	3.7083	0.7133	2.7817	0.9207	yes	yes	no
1	GRMZM2G122816			0.0804	0.056	0.362	1.3152	0.1765	0.029	0	0.4464	no	no	no
1	GRMZM2G000126			0.333	0.7281	0.385	1.3278	0.2679	0.3917	0.9844	0.2528	no	no	no
1	GRMZM2G125918			0.1296	0.5906	0.0518	0.8911	0.0587	0.168	0	0.0978	no	no	no
1	GRMZM2G458084			0.3162	0.414	0.6931	0.9424	0.685	0.2035	0.3371	0.3922	no	no	no
1	GRMZM2G360761			0	0	0.1143	2.3413	1.4175	0.4363	0.2207	0.2105	no	no	no
1	GRMZM2G003246			1.7286	1.7386	4.2574	5.5989	0.6153	0.3972	1.3344	0.5853	yes	yes	no
1	GRMZM2G068639			0.7562	1.9926	2.0408	3.6424	0.939	0.4474	3.2172	1.3499	yes	no	yes
1	GRMZM2G126972			0.1215	1.067	0	1.6973	0.0549	0.4365	0.2104	0.6321	no	no	no
1	GRMZM2G013463			9.7652	16.2299	16.4756	30.4969	7.5525	11.8255	31.3942	17.0558	no	no	no
1	GRMZM2G173865			1.6849	4.7475	4.7533	5.5816	2.304	2.5733	4.5721	4.98	no	no	no
1	GRMZM5G848822			0.3919	0.7116	1.0345	1.3955	0.7633	0.0718	1.1997	0.1902	yes	yes	no
1	GRMZM2G071147			12.234	16.4133	15.7931	20.6202	9.1002	10.4162	10.6243	9.5106	no	yes	no
1	GRMZM2G005000			2.8426	4.2279	10.9398	15.9598	6.8939	5.786	12.8023	10.1863	yes	no	no
1	GRMZM5G861985			1.4352	3.0088	15.6801	18.4984	3.5434	4.3541	5.8257	7.9326	yes	no	no
1	GRMZM5G879570			3.3129	2.5134	4.9498	6.7906	3.0598	1.3685	4.3308	1.9984	yes	yes	no
1	GRMZM5G818643			10.6645	6.4476	11.4696	13.5455	7.9513	10.0898	11.0555	10.1579	no	no	no
1	GRMZM2G135703			0.6615	1.0801	2.6689	4.6661	1.5144	0.3631	1.8187	0.3824	yes	yes	no
1	GRMZM2G439860			1.912	9.3	10.2002	15.6031	3.8857	1.8753	9.7423	3.7908	yes	yes	yes
1	GRMZM2G155340			12.848	12.8244	23.2359	31.37	12.4344	11.4721	21.4599	12.5185	yes	yes	yes
1	GRMZM2G128992			0.4582	0.7098	1.4681	2.152	1.0386	0.0837	1.2171	0.2913	yes	yes	no
1	GRMZM2G450771			0.3135	0.0614	0.823	1.1678	0.3165	0.3069	0.4313	0.2682	no	yes	no
1	GRMZM2G134334			3.2617	1.0288	5.2832	19.4378	7.5257	1.5358	8.9656	1.5696	yes	yes	no
1	GRMZM2G346920			81.2472	95.7504	157.415	189.694	61.6914	40.9131	151.296	64.7499	yes	no	no
1	GRMZM2G056093			3.5892	18.4035	8.7925	26.2114	6.3924	7.2136	15.8603	9.9319	yes	no	yes
1	GRMZM2G175398			0.9825	3.1646	1.4558	4.4106	0.6372	0.7324	1.7026	2.2049	yes	no	yes
1	GRMZM2G155686			9.3642	4.4228	8.4563	28.348	3.6249	3.1964	9.2444	3.7622	yes	yes	no
1	GRMZM2G116670			2.1728	2.4482	2.9168	4.8054	2.531	1.8144	1.9506	1.5804	yes	yes	no
1	GRMZM2G477236			31.2692	36.1	39.9118	55.361	25.6103	24.6174	49.1747	29.304	no	no	no
1	GRMZM2G427729			1.5457	3.3821	2.4011	5.7307	1.8976	0.5626	4.041	1.299	yes	yes	no
1	GRMZM2G168987			0	0.087	1.5571	2.8016	0	0.0663	0	0.174	yes	yes	no
1	AC220927.3_FG001			0.0775	0.9918	2.2994	4.0484	0.8127	0.0845	2.3857	1.1614	yes	yes	no
1	GRMZM2G102959			0.9725	0.4738	0.7291	3.2978	0.915	0.3336	0.9062	0.4994	yes	yes	yes
1	GRMZM2G078650			1.4593	2.0852	1.8538	3.5678	1.2047	0.9362	1.9716	1.559	yes	no	no
1	GRMZM2G128454			3.8324	4.0269	5.744	7.9302	2.7335	2.2456	7.415	3.3837	yes	no	no
1	AC217051.3_FG005			0.8145	7.716	4.9179	9.4856	1.6977	4.0985	3.6651	2.6871	no	no	no
1	GRMZM2G010351			17.3825	5.8093	15.2593	22.8518	9.6061	12.0605	9.6807	13.2751	no	no	no
1	GRMZM2G429873			0.4093	1.4592	1.1119	2.7211	0.2137	0.3676	1.0241	0.9596	yes	no	no
1	GRMZM2G031477			0.5363	1.3731	0.3462	1.9505	0.2516	0.4524	0.4117	0.8311	yes	no	no
1	GRMZM2G046101			9.7139	11.442	11.4165	18.3593	6.8351	1.5785	9.1789	3.105	yes	yes	no
1	GRMZM5G893117			4.313	9.5982	4.3086	13.0674	2.7914	1.7442	9.0657	3.9975	yes	yes	yes
1	GRMZM2G051974			14.9405	11.4116	22.6191	24.3951	9.0297	7.7216	12.8891	8.6882	yes	yes	no
1	GRMZM2G065478			1.5144	0.8628	1.705	4.205	1.5221	0.3979	2.0078	0.7399	yes	yes	no
1	GRMZM2G157481			0.5434	1.5068	1.111	2.5736	1.0196	0.5774	1.0411	0.3278	yes	yes	no
1	AC149818.2_FG004			532.264	293.075	496.443	765.555	433.349	412.425	529.476	583.751	no	no	no
1	GRMZM2G040630			0	0	0	0.1595	0.0518	0	0.0487	0.0094	no	no	no
1	GRMZM2G542847			0.5356	1.1141	1.8643	2.3559	0.542	0.4547	0.9601	0.6288	yes	yes	no
1	GRMZM5G884137			2.7395	1.6411	2.9212	4.5599	1.7896	1.796	2.5846	3.4966	no	no	no
1	GRMZM2G143883			44.5038	73.215	57.5664	79.2138	35.8517	37.5103	45.9639	30.494	yes	yes	no
1	GRMZM2G073892			7.5691	12.115	25.7485	26.728	9.6414	16.049	17.4128	15.6011	no	no	no
1	GRMZM2G136859			30.6637	46.5006	31.3605	61.2347	22.2413	21.7976	23.1927	30.6218	no	no	no
1	GRMZM2G000397			27.0658	16.6188	32.7134	48.2836	19.3748	29.3666	24.1998	30.9263	no	no	no
1	GRMZM2G301089			4.1176	1.5218	3.1717	10.5538	2.2896	0.8809	5.3484	0.3443	yes	yes	no
2	GRMZM2G440614	Sun2	sad1-unc84-like 2 CCSD type	26.992	28.2418	11.5317	17.8348	8.8133	26.2197	24.4017	19.3014	no	no	no
2	GRMZM2G034575			20.9917	24.5187	4.98	7.3072	7.2481	20.9098	13.4255	14.332	no	no	no
2	GRMZM2G039650			7.4291	10.458	2.5858	3.183	3.5391	10.1948	7.3176	5.1506	no	no	no
2	GRMZM2G340282			1.6153	2.696	0.3903	0.1667	0.3677	1.2341	1.0293	0.8905	no	no	no
2	GRMZM5G891371			0.5123	0.8458	0.1076	0.1417	0.1905	0.4304	0.1005	0.3567	no	no	no
2	GRMZM2G102845			20.8288	30.0232	6.6781	9.7476	8.3136	24.5054	18.0189	16.4853	no	no	no
2	GRMZM2G367657			0.243	0.3491	0	0.1743	0.0616	0.2541	0.1487	0.1801	no	no	no
2	GRMZM2G043887			3.314	4.2619	1.776	1.6515	2.369	3.6035	2.2069	0.8641	no	no	no
2	GRMZM2G017815			1.7106	1.7049	0.9969	0.8838	0.6327	1.4256	1.5752	0.7156	no	no	no
2	GRMZM2G033785			23.1762	26.3053	7.2262	14.5269	7.5348	28.1997	19.8171	26.7495	no	no	no
2	GRMZM2G092123			3.7421	5.1731	1.7213	2.036	1.289	2.9007	3.395	2.283	no	no	no
2	GRMZM2G095724			9.3474	14.7057	4.6426	7.1243	4.8093	11.65	8.4503	10.8775	no	no	no
2	GRMZM2G049141			22.1647	30.0996	4.5306	4.4755	9.2043	22.4457	17.4197	12.9786	yes	no	no
2	GRMZM2G110306			5.3106	7.0313	2.1523	2.7017	2.726	8.2523	3.8922	4.9558	no	no	no
2	GRMZM2G129155			8.7421	13.4737	6.0137	6.3425	5.978	11.878	11.8098	7.2002	no	no	no
2	GRMZM2G105770			14.15	18.8929	4.4658	5.9411	5.4398	14.5809	9.7252	8.6309	no	no	no
2	GRMZM2G024260			3.3954	4.8847	1.3999	1.8546	1.9587	3.3816	3.5071	3.498	no	no	no
2	GRMZM2G479746			11.0822	16.9296	5.3729	5.7687	8.7259	19.3713	12.5621	6.0486	yes	no	no
2	GRMZM2G328795			2.4504	4.7444	0.7985	1.8193	0.9989	3.0566	2.416	2.0601	no	no	no
2	GRMZM2G124416			9.8547	12.9422	5.6627	11.2296	5.1028	13.603	11.6798	8.8444	no	no	no
2	GRMZM2G413853			0.8508	1.058	0.7822	0.3729	0.5063	0.9531	1.0347	0.4787	no	no	no
2	GRMZM2G377341			11.1655	16.0724	4.0687	3.2491	6.3705	15.8406	9.5168	9.6033	no	no	no
2	GRMZM2G098677			3.0519	3.6626	0.8734	0.6385	1.4139	3.1157	0.8844	1.7264	yes	no	no
2	AC166636.1_FG008			0.9411	1.4588	0.7158	0.3537	0.388	1.5734	0.6343	0.7996	no	no	no
2	GRMZM2G103452			0.1118	0.2298	0.0479	0.093	0.0207	0.1718	0.1265	0.0843	no	no	no
2	AC234528.1_FG005			41.1675	41.8772	14.6513	24.488	17.9441	48.111	47.3405	35.217	no	no	no
2	GRMZM2G122139			5.7332	6.2677	3.1611	3.4087	3.0417	5.4254	5.8354	2.6182	no	no	no
2	GRMZM2G155962			3.5027	6.6541	1.5249	4.009	1.6756	4.6173	2.3002	3.9435	no	no	no
2	GRMZM2G123499			7.4117	8.4827	2.7615	2.5417	3.843	8.6643	6.7748	5.7511	yes	no	no
2	GRMZM2G079904			7.5573	7.6045	4.0917	5.4137	2.4039	7.2735	7.2401	4.2565	no	no	no
2	GRMZM2G477879			17.2415	20.4947	2.6201	1.9336	5.3438	19.4965	11.5109	10.6622	yes	yes	no
2	GRMZM2G075683			16.1787	20.8982	6.838	7.5978	8.3221	26.1091	15.9321	14.4492	no	no	no
2	GRMZM2G007453			10.1876	12.8462	5.578	7.0919	5.0825	13.849	8.7447	7.1249	no	no	no
2	GRMZM2G035168			3.5161	4.6798	1.1249	1.2974	1.8242	2.9147	2.514	1.9699	no	no	no
2	GRMZM2G103266			26.8017	29.0903	8.8757	11.6748	12.2758	29.9012	17.7481	14.7958	yes	no	no
2	GRMZM5G874903			1.886	2.0038	0.7903	0.827	0.7466	1.8267	1.1641	1.2232	no	no	no
2	GRMZM2G372058			1.3317	1.5121	0.137	0.6282	0.3627	1.9348	1.0326	0.4706	no	no	no
2	GRMZM2G131389			1.5582	3.2155	0.8461	0.653	0.8982	1.6788	0.961	1.0619	no	no	no
2	GRMZM2G085547			7.5631	9.6393	3.6591	4.325	4.3826	10.3223	9.5582	6.6445	yes	no	no
2	GRMZM2G075715			0.8609	1.8586	0.2269	0.2224	0.2139	0.6075	0.7097	1.2921	no	no	no
2	GRMZM2G006965			7.5056	8.5802	3.9603	6.0904	2.8398	10.0895	7.1526	6.8667	no	no	no
2	GRMZM2G453956			1.0983	2.2207	0.6045	0.7288	0.9123	1.8249	1.5131	1.179	no	no	no
2	GRMZM2G066801			1.8425	2.7621	0.5519	1.063	1.257	2.9869	1.781	1.0741	no	no	no
2	GRMZM2G000177			15.3453	15.5933	4.766	4.2476	7.6828	18.0264	10.978	13.244	yes	no	no
2	GRMZM5G880993			6.5643	7.0722	2.8903	5.9919	4.9736	6.6362	4.1047	4.5037	no	no	no
2	GRMZM2G005996			23.5246	40.9556	10.6712	13.0708	11.4276	29.414	25.2784	15.4971	no	no	no
2	GRMZM2G073888			16.3914	16.1281	5.4406	6.5123	7.5362	19.0713	12.9504	12.1759	yes	no	no
2	GRMZM2G308884			2.3125	5.8262	2.083	3.0104	1.3628	4.1014	4.4771	2.2371	no	no	no
2	GRMZM2G375172			18.7048	25.5164	10.4581	11.8944	8.5933	24.8071	20.8622	13.6107	no	no	no
2	GRMZM2G053588			4.3426	9.9588	4.3999	1.4818	4.983	6.6216	7.314	5.8148	yes	yes	no
2	GRMZM2G342327			28.853	32.9515	25.5775	26.4346	16.3628	36.9968	25.3886	24.1677	no	no	no
2	GRMZM2G021514			0.6605	1.4691	0.2444	0.1777	0.2012	0.7922	0.6871	0.6742	no	no	no
2	AC214040.3_FG009			0.2475	0.4995	0	0.0626	0.0272	0.1974	0.0667	0.0229	no	yes	no
2	GRMZM2G341166			0.2636	0.6124	0.0532	0.3173	0.1872	0.3964	0.4624	0.2118	no	no	no
2	GRMZM2G376829			0.7539	1.9259	0.9486	0.5105	0.487	1.4604	1.3661	0.8198	no	no	no
2	GRMZM2G107739			19.5084	22.9008	7.0395	7.7333	8.183	22.9573	13.6276	12.134	no	no	no
2	GRMZM2G311024			1.2497	2.3749	0.4994	1.0586	0.8458	2.2999	1.1035	1.7244	no	no	no
2	GRMZM2G126975			2.0768	2.1755	0.3364	0.4566	0.5743	2.8168	0.3554	0.9865	yes	no	no
2	GRMZM2G105368			15.4715	21.4657	9.4316	12.4992	8.613	21.2316	14.44	13.6372	no	no	no
2	GRMZM2G066101			80.5644	100.915	32.1084	48.1016	37.3087	74.0836	97.8481	74.3693	no	no	no
2	GRMZM2G013471			8.2368	8.625	6.677	4.4215	4.2059	10.7182	8.5263	5.8852	yes	no	no
2	GRMZM2G356423			2.5536	6.6786	1.2503	1.0142	2.3366	3.8936	2.6002	2.5103	no	no	no
2	GRMZM2G472376			21.1987	25.6637	5.6633	7.4128	6.7493	16.109	13.8994	11.1433	no	no	no
2	AC191283.3_FG004			1.4711	1.7488	0.219	0.3858	0.5614	1.6555	1.9911	1.1078	no	no	no
2	GRMZM2G005374			2.4661	3.4626	2.0662	2.127	1.2649	3.3399	2.8483	1.3231	no	no	no
2	GRMZM2G050186			16.6666	19.4918	9.5002	8.9288	9.7595	21.4472	16.725	13.9657	yes	no	no
2	GRMZM2G328265			0.5294	0.8278	0.1893	0.2495	0.1711	0.8172	0.7169	0.6391	no	no	no
2	GRMZM2G154059			3.2759	3.8698	2.1494	1.1129	1.7677	3.7803	3.0008	1.8984	no	no	no
2	GRMZM2G303661			2.9822	6.0398	0.2183	0.3608	1.0522	3.6514	4.2771	1.3081	yes	no	no
2	GRMZM5G892973			5.4149	5.7045	2.4933	2.6529	2.5713	5.9432	4.7209	5.4361	no	no	no
2	GRMZM2G062357			5.4256	6.9715	2.3973	1.8579	1.5291	5.7222	5.0073	2.4343	no	no	no
2	GRMZM2G009368			1.0611	1.5813	0.4617	0.3254	0.4036	1.592	0.3484	0.4868	no	no	no
2	GRMZM2G152194			11.9926	18.0009	5.3532	7.2563	9.7047	19.8469	13.7715	8.4752	yes	no	no
2	GRMZM2G122843			8.3679	9.1685	3.8701	3.3765	4.3735	9.6457	8.1415	5.5495	no	no	no
2	GRMZM2G056120			42.645	47.4363	21.4878	22.6819	12.9565	30.4532	37.6006	22.0235	no	no	no
2	GRMZM2G062084			27.1219	30.9541	12.4303	17.0626	10.2115	22.1301	20.9874	17.7481	no	no	no
2	GRMZM2G391936			0.5248	1.3669	0.2077	0.344	0.1924	0.6284	0.8963	0.2342	no	no	no
2	GRMZM2G052178			26.0489	27.5071	8.6376	14.4499	11.4321	30.4497	23.4336	19.2358	no	no	no
2	GRMZM2G443447			7.1071	9.9423	1.2877	0.8124	2.8545	6.2762	5.0232	4.6791	yes	yes	no
2	GRMZM2G121612			8.2378	10.7374	4.5266	3.7946	4.1694	13.036	7.823	7.2886	no	no	no
2	GRMZM2G045128			11.9897	16.3904	2.3469	2.4386	4.8371	15.8137	6.3212	8.507	yes	no	no
2	GRMZM2G332410			0.1934	0.3094	0.09	0.0891	0.0481	0.307	0.2853	0.1997	no	no	no
2	GRMZM2G097812			4.952	12.2647	1.9766	2.4977	2.3113	10.724	7.4283	4.2966	yes	no	no
2	GRMZM2G327855			0.1422	0.1855	0	0	0.0397	0.0707	0.1463	0.0066	no	yes	no
2	GRMZM2G092627			8.4334	14.7161	2.4223	1.5324	4.8706	12.0302	7.1143	6.8845	yes	yes	no
2	GRMZM2G441748			0.4203	0.6206	0.2297	0.1091	0.2294	0.2929	0.1175	0.564	no	no	no
2	GRMZM2G156924			0.5469	1.742	0.0695	0.4173	0.3737	1.0766	1.3471	0.541	no	no	no
2	GRMZM2G537291			25.8922	35.5139	13.5519	20.4201	12.6727	27.0979	33.8706	20.5822	no	no	no
2	GRMZM2G100454			2.3862	5.5159	2.1375	2.0388	2.1677	4.4323	3.7248	3.1304	no	no	no
2	GRMZM2G159399			3.7982	5.5423	1.1768	2.1641	0.6637	3.0208	1.9546	1.8415	no	no	no
2	GRMZM2G165778			1.5476	5.1299	0.9357	1.0169	0.7116	3.2219	2.2479	1.7599	no	no	no
2	GRMZM5G892495			3.2784	5.7273	1.2627	1.7055	0.8714	4.5404	2.257	3.3427	no	no	no
2	GRMZM2G069106			6.6649	6.9105	3.5627	3.8356	3.7882	8.1677	5.6637	4.8396	no	no	no
2	GRMZM2G032337			12.0869	13.4761	4.7611	6.3185	5.4886	13.3437	6.4839	7.2135	no	no	no
2	GRMZM2G477872			1.3465	1.516	0.5968	0.667	0.4567	1.1348	0.72	0.7691	no	no	no
2	GRMZM2G176397			40.3265	46.3212	11.4196	14.1642	11.4684	47.7734	28.9477	33.4636	no	no	no
2	GRMZM2G087712			15.3106	16.6196	3.223	4.8452	6.0174	20.7402	12.6932	8.1943	yes	no	no
2	GRMZM2G028921			5.834	7.6296	2.2547	3.2117	3.434	7.7948	5.7151	4.6402	no	no	no
2	GRMZM2G085078			12.5763	12.6935	4.8322	4.0414	5.7544	11.8662	7.1687	6.5056	no	no	no
2	GRMZM5G843893			0.435	0.8615	0.23	0.2831	0.3478	0.4897	0.6197	0.5524	no	no	no
2	GRMZM2G127374			2.1767	3.1551	1.3785	1.8064	0.9621	2.5421	2.8844	1.8837	no	no	no
2	GRMZM2G151905			9.1416	10.4381	3.0298	3.8667	4.1286	10	8.193	5.7138	no	no	no
2	GRMZM2G053047			6.5937	10.0556	5.8689	6.7864	4.09	10.9887	6.1569	5.8925	no	no	no
2	GRMZM2G004276			0.2066	0.4869	0.0582	0.1383	0.1813	0.2957	0.2301	0.2294	no	no	no
2	GRMZM2G426414			1.0846	1.1633	0.3635	0.4639	0.178	0.7597	0.266	0.5967	no	no	no
2	GRMZM2G456238			1.0504	1.0738	0.3126	0.1181	0.4618	0.6177	0.5402	0.4413	no	no	no
2	GRMZM2G398527			10.396	21.1551	3.194	2.2394	5.8345	19.0133	12.1693	11.9706	yes	yes	no
2	GRMZM2G360626			2.4379	5.4778	0.6361	0.7271	1.3232	2.6575	1.4181	2.3281	no	no	no
2	GRMZM2G023220			9.3817	19.4944	4.6549	5.6927	4.6278	13.5933	11.1539	6.4303	no	no	no
2	GRMZM2G126463			1.3166	2.2058	0.9005	1.0301	0.321	1.8779	0.3797	1.0131	no	no	no
2	GRMZM2G149230			9.4983	9.0248	3.6387	4.5163	3.8072	8.6309	7.4872	4.392	no	no	no
2	GRMZM2G021471			3.0504	3.6848	1.7563	2.346	2.503	4.1008	2.4299	2.2276	no	no	no
2	AC205834.3_FG003			0.0671	0.0892	0.0315	0.0119	0.0187	0.0771	0.0169	0.0229	no	no	no
2	GRMZM2G053384			1.8901	2.9216	1.3634	0.7696	0.8729	2.1029	2.4468	1.3227	no	no	no
2	GRMZM2G081745			38.3411	52.2969	27.4638	21.0904	30.6061	51.3478	38.368	36.5789	yes	no	no
2	GRMZM2G443202			0.5834	0.8515	0.3928	0.4416	0.2763	0.5567	0.5931	0.6775	no	no	no
2	GRMZM2G151944			3.2381	6.2246	1.7842	1.4989	2.8972	3.943	2.8026	3.1094	no	no	no
2	GRMZM2G417496			1.79	2.3953	0.8428	0.1808	0.8186	2.098	1.4817	1.2998	yes	no	no
2	GRMZM2G324991			5.8425	8.4171	3.2284	3.0759	2.0176	7.7418	5.5717	6.8728	no	no	no
2	GRMZM2G092072			1.0011	1.0908	0.1323	0.3914	0.3994	0.7151	0.4862	0.4929	no	no	no
2	GRMZM2G030578			11.5488	12.3337	4.943	5.0545	5.4703	10.6583	11.6368	7.2888	no	no	no
2	GRMZM2G327032			20.0637	23.2829	10.0371	10.0321	12.9333	25.6478	19.0073	19.1981	no	no	no
2	GRMZM2G143718			8.775	11.5249	7.3709	8.9557	4.6954	10.1493	10.3387	7.2947	no	no	no
2	GRMZM2G466743			1.4975	2.126	0.855	1.0043	0.7367	2.1802	1.5075	1.1939	no	no	no
2	AC214817.3_FG004			4.8395	8.845	1.7385	5.119	1.9032	6.7281	2.8338	7.2546	no	no	no
2	GRMZM2G421680			0.3168	1.765	0.7339	0.0485	0.6169	1.2203	0.8349	0.2187	yes	no	no
2	GRMZM2G044143			11.906	14.3257	2.6223	2.7506	5.0669	15.838	8.8764	8.9452	no	no	no
2	GRMZM2G176523			2.8163	3.1881	1.2368	1.5517	1.347	2.8677	3.1744	1.8435	no	no	no
2	GRMZM2G066485			2.1233	2.1184	0.6249	0.6768	1.5211	2.7025	1.4221	1.0543	no	no	no
2	GRMZM2G071015			11.4583	10.4998	3.8284	5.9712	3.0956	11.5357	12.7353	5.9539	no	no	no
2	GRMZM2G018082			14.4992	17.877	8.7231	13.9539	7.2484	18.3369	15.4827	13.6708	no	no	no
2	GRMZM2G080380			8.0576	12.3686	5.0378	7.2534	5.3706	9.5	10.8129	9.5759	no	no	no
2	GRMZM2G139583			14.363	19.0909	9.6214	9.7071	6.9406	18.215	14.0995	10.9753	no	no	no
2	GRMZM2G166658			14.5668	18.012	3.2352	6.2887	6.1151	18.8998	8.4813	10.2283	no	no	no
2	GRMZM2G054378			3.8384	4.4431	2.0877	2.5152	2.0749	4.753	2.9168	2.6334	no	no	no
2	GRMZM2G088014			9.5156	12.8472	4.1458	4.2039	4.682	15.3808	8.9462	6.6892	no	no	no
2	GRMZM2G099088			1.3848	3.5979	0.2711	0.8292	0.6186	2.2282	1.3486	1.6569	no	no	no
2	GRMZM2G088648			6.8269	11.3227	9.6814	5.3874	2.9224	8.8753	8.1828	5.942	no	no	no
2	GRMZM2G028980			30.7533	35.1203	9.3204	16.5455	10.4944	39.4428	20.2833	25.9199	no	no	no
2	GRMZM2G081158			17.8038	40.2152	9.6938	19.295	7.4761	30.2385	16.6992	21.4024	no	no	no
2	GRMZM2G083836			47.1209	45.41	12.4109	18.7556	17.5743	47.1349	39.9278	32.8506	no	no	no
2	GRMZM2G043183			1.794	2.6291	0.6453	1.3405	1.6034	1.8396	2.466	1.1201	no	no	no
2	GRMZM2G152408			7.6076	9.664	6.5243	5.9528	4.9961	10.1766	6.3694	8.6397	no	no	no
2	GRMZM2G052586			12.531	13.7113	3.842	5.9382	5.1758	16.021	10.1012	4.9797	yes	no	no
2	GRMZM2G108600			6.2491	5.9943	2.3078	3.9847	2.9494	6.7713	4.443	3.59	no	no	no
2	GRMZM2G378836			0.9189	1.8526	1.2137	0.4356	0.6491	1.4364	1.2718	0.8926	no	no	no
2	GRMZM2G429928			0.118	0.4253	0.0355	0.0694	0.0515	0.1967	0.1768	0.1591	no	no	no
2	GRMZM2G073219			1.5325	1.9418	0.3932	0.5672	1.5627	1.6209	1.496	0.5385	no	no	no
2	GRMZM2G145870			38.6328	36.7087	21.034	26.534	16.7311	39.1896	41.5308	32.0842	no	no	no
2	GRMZM2G041797			16.7822	15.5755	6.5848	8.094	4.7347	17.1385	16.8594	10.2301	no	no	no
2	GRMZM2G099036			2.3026	3.0942	1.6409	1.1968	0.793	2.6422	2.568	1.482	no	no	no
2	GRMZM2G094090			5.3681	4.9055	2.6249	2.3449	2.5554	5.8479	4.9644	3.2088	no	no	no
2	GRMZM2G063679			12.4296	17.7401	3.9593	5.6096	4.5581	18.5861	12.843	8.5542	yes	no	no
2	GRMZM2G345991			3.8587	4.8773	2.476	3.1361	1.446	3.4825	2.9804	2.9507	no	no	no
2	GRMZM2G150190			9.9856	11.9119	5.6757	6.4441	4.3708	13.7466	11.9633	8.9736	no	no	no
2	GRMZM2G329867			6.0299	6.0157	2.1256	2.529	1.9627	5.4571	4.9731	2.7735	no	no	no
2	GRMZM2G119657			9.3794	17.4564	5.0772	3.7263	6.9041	13.9999	12.232	9.6059	yes	no	no
2	GRMZM2G058155			0.9866	1.709	0.6068	0.4481	0.825	1.175	0.6097	0.7658	no	no	no
2	GRMZM2G125193			7.2337	9.9508	2.5742	3.8379	4.317	11.3433	7.1796	7.7918	no	no	no
2	GRMZM2G423555			0.4048	1.8825	0.251	0.3856	0.4334	1.1324	0.6077	1.0861	no	no	no
2	GRMZM2G160664			2.264	3.1141	0.4101	0.5812	0.3802	1.7698	1.6343	1.5613	no	no	no
2	AC152495.1_FG010			0.8708	1.2073	0.3362	0.3182	0.5051	1.2959	0.824	0.7725	no	no	no
2	GRMZM2G126026			23.0314	39.5047	7.4219	16.7047	10.7529	28.6977	19.6096	23.3422	no	no	no
2	GRMZM2G124557			16.6603	27.6159	15.5735	9.3675	15.6497	23.1615	23.4889	16.7396	yes	yes	no
2	GRMZM2G425647			1.0801	1.8099	0.494	0.679	1.023	1.5914	0.6989	0.8444	no	no	no
2	GRMZM2G137971			4.1698	5.998	2.8435	3.1447	1.7787	5.9887	5.0237	3.9162	no	no	no
2	AC233935.1_FG005			1.1198	1.6029	0.646	0.5157	0.2693	1.1302	0.4564	0.8802	no	no	no
2	GRMZM2G149952			10.7949	13.7973	5.3911	6.8797	3.8784	12.7991	12.4864	6.1487	no	no	no
2	GRMZM2G031656			18.6435	19.6431	6.6932	8.3342	7.3249	22.8526	18.308	13.2194	no	no	no
2	GRMZM2G066638			0.6371	0.827	0.19	0.2903	0.2493	0.7219	0.5989	0.5064	no	no	no
2	GRMZM5G817246			6.669	10.0538	3.689	5.2411	1.5788	10.0074	6.3436	9.4785	no	no	no
2	GRMZM2G169462			14.2578	14.485	2.9331	4.6231	5.1049	17.4496	11.3526	9.2235	no	no	no
2	GRMZM2G139657			8.0547	8.4379	4.3121	4.925	3.4066	6.7417	8.027	3.7482	no	no	no
2	GRMZM2G076075			13.2668	22.2488	7.8918	9.4129	8.0963	15.2667	17.3315	12.4604	no	no	no
2	GRMZM2G563728			0.758	1.7826	0.3167	0.1132	0.3118	1.3366	0.1768	0.6581	no	no	no
2	GRMZM2G073750			9.3074	28.0748	6.8263	11.6616	7.6091	23.449	10.0837	17.2945	no	no	no
2	GRMZM2G100732			5.3249	10.4989	1.46	1.7582	2.2485	10.5809	6.6831	5.4772	yes	no	no
2	GRMZM2G440943			6.1325	8.916	2.1396	1.4794	3.0125	8.7355	5.6925	4.9061	yes	no	no
2	GRMZM2G352959			7.9359	8.7623	2.9703	2.6816	5.1022	9.2411	8.3329	6.1892	no	no	no
2	GRMZM2G370852			23.7711	29.6425	10.2065	10.9844	10.2139	23.9412	22.2064	15.2839	no	no	no
2	GRMZM2G083475			30.3312	41.55	10.3678	12.037	14.6582	48.1314	27.321	28.8567	yes	yes	no
2	GRMZM2G067476			48.5871	59.495	28.5999	46.0278	19.6433	69.3772	50.086	44.903	no	no	no
2	GRMZM5G811285			1.2112	1.759	0.5314	1.2861	0.6343	1.6605	0.6076	1.1642	no	no	no
2	GRMZM2G040720			6.2659	6.6848	2.2776	3.0112	2.9626	7.545	4.4231	3.0767	yes	no	no
2	GRMZM2G170016			0.3629	0.8336	0.6189	0.3743	0.0889	0.7652	0.3454	0.3415	no	no	no
2	GRMZM2G133988			0.5902	0.6601	0.1134	0.2825	0.1779	0.7237	0.3637	0.5964	no	no	no
2	GRMZM2G123373			1.634	2.8122	0.1523	1.189	0.7032	1.8992	1.4281	0.8291	no	no	no
2	GRMZM2G128748			14.4764	20.2497	12.2539	12.265	9.161	19.1905	13.8715	18.0184	no	no	no
2	GRMZM2G122935			9.6498	8.8131	4.0048	5.4189	3.7587	8.6804	8.7643	5.5687	no	no	no
2	GRMZM2G172152			10.8256	13.011	4.8667	5.3533	7.7543	14.202	12.2443	8.3996	no	no	no
2	GRMZM2G359822			1.617	2.0064	0.8663	1.115	1.3063	1.8917	1.0989	0.904	no	no	no
2	GRMZM2G049351			3.4818	6.0177	1.6752	1.384	2.0606	3.7208	4.7699	2.8632	no	no	no
2	GRMZM2G040876			31.3138	30.0879	10.5062	14.4673	13.8796	32.5955	27.4762	22.2757	no	no	no
2	GRMZM2G047815			7.1972	9.8669	2.4348	3.3591	3.2553	9.5764	3.2161	3.4669	no	no	no
2	GRMZM2G047028			10.1949	12.4531	3.0553	4.9626	2.9147	15.515	10.7949	6.1878	no	no	no
2	GRMZM2G064563			21.3823	22.3086	6.0162	10.4062	6.8795	22.0442	13.231	13.1234	no	no	no
2	GRMZM2G099328			2.5438	2.8099	1.481	1.2683	1.0734	2.5324	2.4442	1.544	no	no	no
2	GRMZM2G704093			9.9178	19.6854	4.6249	4.864	6.4978	12.161	14.0844	7.779	no	no	no
2	GRMZM5G821639			38.8318	41.11	13.028	20.2904	13.7543	38.9168	22.1395	25.8084	no	no	no
2	GRMZM2G175955			2.2554	4.8687	0.8235	0.9659	0.9945	5.0476	1.9465	2.6477	no	no	no
2	GRMZM2G142660			9.7466	8.85	2.3411	4.6023	3.2758	9.8284	9.3782	6.0199	no	no	no
2	GRMZM2G118074			2.9155	3.399	1.0815	1.15	1.068	3.3088	2.183	2.1881	no	no	no
2	AC185276.2_FG006			3.5142	4.1556	2.6866	2.1609	1.1285	3.1298	3.4227	2.5898	no	no	no
2	GRMZM2G084515			8.3344	9.8538	3.3644	6.0673	3.7583	7.2113	9.4874	6.4612	no	no	no
2	GRMZM2G453001			5.6685	5.8064	2.748	2.7135	2.9837	6.7584	5.8218	3.9306	no	no	no
2	GRMZM2G161376			0.5416	1.4571	0.3555	0.4989	0.3393	1.0683	0.8496	0.8946	no	no	no
2	GRMZM2G112769			7.5904	15.5318	5.0427	4.4891	6.5402	7.3487	12.0989	6.1866	no	no	no
2	GRMZM2G126019			31.2445	35.5442	12.0547	15.1243	14.9844	39.6708	27.4672	24.9112	no	no	no
2	GRMZM2G329300			22.3796	27.6022	9.1597	10.7983	9.9519	30.98	28.2856	21.3277	no	no	no
2	GRMZM2G026892			11.9427	15.9289	3.4831	5.643	5.3705	17.3921	14.0308	7.3962	yes	no	no
2	GRMZM2G519736			0.4886	1.1302	0.2552	0.2196	0.3191	0.8074	0.5281	0.3383	no	no	no
2	GRMZM2G160578			1.4408	2.3967	0.5095	0.9373	0.4106	3.039	1.3448	0.7289	no	no	no
2	GRMZM2G138125			29.7546	39.0959	10.2048	13.5412	14.2772	44.9508	25.1998	28.457	no	no	no
2	GRMZM2G037131			0.0995	0.0948	0	0.0315	0.0248	0.113	0.0524	0.0428	no	yes	yes
2	GRMZM2G004087			12.9568	16.6387	3.8807	4.3851	7.7503	17.75	8.1712	16.0293	yes	yes	no
2	GRMZM2G047695			14.4977	14.4429	6.4037	5.025	6.2367	11.091	11.2179	8.1468	no	no	no
2	GRMZM2G003488			12.4066	25.7121	3.7175	6.6787	8.5013	25.3443	12.5923	15.6104	no	no	no
2	GRMZM2G095865			54.5055	54.5084	13.5254	15.1981	16.1387	57.9992	44.3624	30.2711	no	no	no
2	GRMZM2G042295			6.4589	6.9532	2.9096	3.0174	2.1969	8.0587	6.935	4.0233	no	no	no
2	GRMZM2G343139			0.3191	0.5374	0.0754	0.066	0.1281	0.5655	0.444	0.3069	no	no	no
2	GRMZM2G446108			8.6928	8.7551	2.6314	3.1875	2.4014	4.9842	6.0873	3.4743	no	no	no
2	GRMZM2G162286			11.2605	16.7125	4.9542	5.2501	7.1969	8.6287	13.1213	11.669	no	no	no
2	GRMZM2G115564			5.493	6.1604	2.6686	2.8612	3.1069	6.2051	4.9826	3.8113	no	no	no
2	GRMZM2G472547			0.9267	0.8962	0.4647	0.3659	0.4232	0.7359	0.6287	0.5329	no	no	no
2	GRMZM2G007060			9.6225	9.2076	4.7986	5.2344	5.2488	10.6476	7.8088	7.2961	no	no	no
2	GRMZM2G131988			5.6807	7.4491	2.704	3.5147	2.9516	8.6104	6.0404	3.8274	yes	no	no
2	GRMZM2G575526			0.5742	1.9745	0.3266	0.6952	0.3093	1.6918	0.1321	0.6571	no	no	no
2	GRMZM2G114093			0.3995	0.5108	0.2695	0.1884	0.2973	0.5026	0.3088	0.3407	no	no	no
2	GRMZM2G081380			16.8604	27.2151	10.1083	14.1684	11.3937	23.4071	22.3982	20.9749	no	no	no
2	GRMZM2G356579			8.3482	9.4182	5.1621	5.2795	4.9363	10.2589	8.504	6.7883	no	no	no
2	GRMZM2G424595			3.6637	7.3984	1.4826	1.5628	2.5409	4.1921	4.83	2.7999	no	no	no
2	GRMZM2G423861			13.3903	16.3314	7.985	6.6939	6.7263	18.3987	14.1072	10.6055	no	no	no
2	GRMZM2G333183			0.7875	1.0682	0.2723	0.3389	0.4219	1.0917	0.5177	0.3553	no	no	no
2	GRMZM2G433557			18.4721	23.0279	9.2053	9.2145	10.9634	26.051	13.6299	14.517	yes	no	no
2	GRMZM2G085747			23.9261	43.5848	15.8625	18.808	12.9673	25.8114	29.5598	20.7148	no	no	no
2	GRMZM2G023638			8.3403	10.7853	3.5293	5.0253	5.5508	13.3561	6.1482	6.5459	no	no	no
2	GRMZM2G330229			8.9819	10.0934	2.0045	2.4196	1.7092	6.8368	5.032	1.1872	no	no	no
2	GRMZM2G322090			27.5137	36.9809	10.0935	9.5375	15.869	42.961	29.0182	23.981	yes	no	no
2	GRMZM2G148807			1.0283	2.1149	0.4625	0.54	0.6603	1.8776	0.9131	1.0712	no	no	no
2	GRMZM2G031859			16.5461	25.7678	5.1734	6.4867	6.901	16.5405	14.0334	13.7336	yes	no	no
2	GRMZM2G178120			13.2432	16.9776	5.8113	5.5534	7.035	13.1586	12.2376	8.0907	yes	no	no
2	GRMZM2G100084			20.4319	21.3737	11.5172	13.5496	10.6725	21.585	23.4685	18.1634	no	no	no
2	GRMZM5G872442			25.3395	34.554	13.768	20.5725	14.8767	24.3359	21.2987	22.2722	no	no	no
2	GRMZM2G171660			7.1739	8.8284	4.6326	3.9349	5.0968	10.339	6.3747	6.2497	no	no	no
2	GRMZM2G375064			1.2951	1.5276	0.2959	0.4455	0.4777	1.4797	0.739	0.5498	no	no	no
2	GRMZM2G123537			9.3433	11.0628	3.5432	3.2601	5.1716	11.8247	8.8814	6.7738	yes	no	no
2	GRMZM2G064841			10.4464	11.996	3.0322	4.7653	3.7569	9.3666	7.3938	6.3231	no	no	no
2	GRMZM2G016084			3.7456	7.4301	2.5733	3.7354	2.2787	5.126	5.4649	3.591	no	no	no
2	GRMZM2G029933			8.5145	8.7002	3.8035	5.1106	3.1614	7.0822	7.1982	6.7035	no	no	no
2	GRMZM2G348675			20.8574	29.6542	12.7247	8.4732	17.1593	28.0604	24.085	17.4217	no	no	no
2	GRMZM2G354867			4.3932	7.2704	3.6753	2.5721	3.9196	5.6034	3.7456	2.6542	no	no	no
2	GRMZM2G464754			4.6494	7.3365	1.7782	1.9421	2.9952	6.6131	4.2107	3.5843	no	no	no
2	GRMZM2G064750			1.6137	1.6903	0.56	0.4562	0.7679	1.5827	0.8822	0.8732	no	no	no
2	GRMZM2G164502			1.4971	3.3602	0.714	1.975	1.0234	2.5003	1.7042	2.8247	no	no	no
2	GRMZM2G472023			6.8541	10.3191	3.7368	3.9768	5.7307	10.8044	7.1414	6.3065	no	no	no
2	GRMZM2G135966			0.653	1.0393	0.3462	0.4169	0.2634	1.0193	0.4754	0.6724	no	no	no
2	GRMZM2G069408			10.3713	11.892	4.2544	6.1081	4.54	10.8294	9.0311	7.2101	no	no	no
2	GRMZM2G413796			3.1362	2.987	1.2103	1.7057	1.1283	2.6193	2.2186	1.6251	no	no	no
2	GRMZM2G083317			4.4561	5.7713	2.7717	2.7417	3.7208	5.7885	4.9667	3.4549	no	no	no
2	GRMZM2G116646			3.0056	5.751	0.9257	1.1249	1.3137	2.6139	1.3406	1.2177	no	no	no
2	GRMZM2G098796			0.9718	1.5875	0.5083	0.9741	0.8824	1.1539	1.3768	0.8256	no	no	no
2	GRMZM2G084819			9.5454	8.8009	2.3363	1.8558	3.2824	7.2483	5.5077	4.0471	no	no	no
2	GRMZM2G026309			11.9088	12.1176	5.6347	6.6174	5.2589	10.549	10.0633	7.4491	no	no	no
2	GRMZM2G357804			43.8625	42.2379	13.3547	13.5425	15.3918	46.1563	34.2176	26.5349	yes	yes	no
2	GRMZM2G446189			0.7536	3.4614	0.7813	0.7701	0.5777	2.5923	1.7553	1.0654	no	no	no
2	GRMZM2G333579			5.7999	6.1017	4.0984	3.2257	6.6392	6.9815	5.3897	4.8051	no	no	no
2	GRMZM2G307567			1.0277	1.2493	0.4548	0.1701	0.5851	0.679	0.9453	0.6181	no	no	no
2	GRMZM2G066191	tub4	beta tubulin4	7.6795	8.8657	2.9419	6.0421	3.1075	7.2881	3.8418	6.0827	no	no	no
2	GRMZM2G329944			0.8511	3.1571	0.2153	0.201	0.4164	2.1328	1.7826	1.1608	yes	yes	no
2	GRMZM2G052821			1.9521	3.7679	1.9236	1.8762	0.9364	3.609	2.5414	1.5643	no	no	no
2	GRMZM2G317743			0	2.7589	0	0	0.1456	1.6003	0	0.5123	no	no	no
2	GRMZM2G177220			1.8117	3.9035	0.54	0.9858	0.6144	3.5361	1.3109	1.9068	no	no	no
2	GRMZM2G010357			14.0959	21.4274	4.1562	5.021	9.3448	24.5396	15.5665	11.9218	yes	yes	no
2	AC209705.3_FG004			19.2776	19.4228	8.5401	6.7754	11.7824	16.9814	15.291	16.5299	no	no	no
2	GRMZM2G089132			10.1851	11.3145	2.5065	3.6974	1.8336	6.7937	4.9737	3.7303	no	no	no
2	GRMZM2G078200			20.3339	28.408	8.4615	13.9136	8.8856	24.0484	25.8458	20.8752	no	no	no
2	GRMZM2G107196			11.445	13.0684	5.5085	7.1262	6.2026	12.8674	13.2398	9.0598	no	no	no
2	GRMZM2G045987			39.523	44.6269	15.5677	20.8672	21.2229	41.5892	46.7033	32.3663	no	no	no
2	GRMZM2G017337			3.0618	3.2084	0.7666	1.2399	1.7789	2.9514	1.8719	3.1706	no	no	no
2	GRMZM5G808787			2.2557	4.1347	0.6602	0.9817	1.0337	3.3128	1.2787	0.874	no	no	no
2	GRMZM2G118497			9.0609	15.4105	7.3591	7.6421	4.6673	10.6276	10.5554	7.209	no	no	no
2	GRMZM2G163717			4.1195	3.9961	2.1588	1.5847	1.6497	4.6999	3.5445	2.6575	no	no	no
2	GRMZM2G067019			13.1995	12.7592	3.999	7.6965	5.6025	12.4487	10.803	8.3639	no	no	no
2	GRMZM2G167338			7.7725	7.8177	3.7864	3.9203	4.3031	8.3846	8.6929	5.5787	no	no	no
2	GRMZM2G066290			48.7215	61.7365	23.3995	37.7024	26.0357	51.9675	41.0125	42.0385	no	no	no
2	GRMZM2G149317			2.082	3.7771	1.9969	0.7567	1.1304	3.0231	3.448	1.4445	yes	no	no
2	GRMZM2G348582			1.8793	3.6492	1.4132	0.8019	1.5208	2.4487	1.7257	2.356	no	no	no
2	GRMZM2G007188			14.1429	16.7036	3.4751	7.5885	4.8236	19.8675	17.8124	9.6736	no	no	no
2	GRMZM2G038050			14.6746	18.1487	4.4089	4.985	6.6173	19.5836	11.2071	11.6071	no	no	no
2	GRMZM2G133919			30.0475	37.4098	11.292	12.0787	10.3674	26.8322	28.3457	16.2584	no	no	no
2	GRMZM2G036050			25.6528	25.1684	9.5719	10.354	13.861	27.6289	21.3172	19.928	yes	yes	no
2	GRMZM2G128315			21.585	21.7744	7.2361	12.474	8.5202	19.6369	25.8047	18.4102	no	no	no
2	GRMZM2G140600			1.3873	1.5488	0.2133	0.6757	0.5126	1.341	0.5643	1.0999	no	no	no
2	GRMZM2G121704			9.071	10.2407	2.7252	4.0847	3.435	11.3742	8.1572	6.4533	no	no	no
2	GRMZM2G043435			9.2238	13.6807	6.4934	5.3982	4.9305	9.468	11.4439	6.0301	no	no	no
2	GRMZM2G072973			6.5713	6.9455	2.9085	4.9355	4.294	6.0322	7.4714	4.4536	no	no	no
2	GRMZM2G149802			25.2172	27.6983	6.9262	6.484	10.2605	25.7727	16.3727	15.1545	no	no	no
2	GRMZM2G479373			0.5405	0.511	0.0588	0.1292	0.2035	0.4004	0.3319	0.2659	no	no	no
2	GRMZM2G394722			4.425	7.2062	1.4015	0.7273	2.6392	6.4435	3.442	3.2143	yes	no	no
2	GRMZM2G305096			1.125	2.0984	0.6549	0.339	0.3274	2.4682	0.7397	0.6699	yes	no	no
2	AC152495.1_FG017			0.1319	0.3013	0.0728	0.0805	0.1363	0.3204	0.1124	0.0964	no	no	no
2	GRMZM2G134329			14.3614	15.9294	4.9098	7.2405	5.3088	12.786	9.3709	8.3846	no	no	no
2	GRMZM2G101938			52.5012	47.6951	17.4141	34.6432	19.4381	54.54	47.8793	40.0245	no	no	no
2	AC212023.4_FG006			0.9736	1.2962	0.3681	0.4363	0.3716	0.7966	0.1561	0.2932	no	no	no
2	GRMZM2G141136			1.9997	2.0946	0.565	0.8898	0.4095	1.9865	1.7148	0.6365	no	no	no
2	GRMZM2G158437			5.4675	6.3653	2.3506	3.9157	2.4814	4.7679	3.6001	3.3808	no	no	no
2	GRMZM2G024647			226.594	243.597	107.766	181.975	114.264	242.305	197.797	173.97	no	no	no
2	GRMZM2G005024	orp2	orange pericarp2	15.975	19.7187	9.8296	13.2401	7.5696	15.7441	17.083	11.7496	no	no	no
2	GRMZM5G879178			1.7589	2.3306	0.8317	0.4674	1.0151	2.0655	2.3789	1.1396	yes	no	no
2	GRMZM2G075002			0.473	0.5479	0.1011	0.248	0.2366	0.6141	0.1117	0.1778	no	no	no
2	GRMZM2G043331			17.9649	29.1023	14.5794	16.4945	12.9276	23.3746	25.8213	20.828	no	no	no
2	GRMZM2G133819			9.0273	8.6333	4.362	4.5375	4.9984	10.1522	9.3157	7.2739	no	no	no
2	GRMZM2G040247			13.1873	13.9716	6.2799	6.9715	6.2429	15.67	14.6533	11.1037	no	no	no
2	GRMZM2G173137			23.3208	25.3726	10.2566	12.6091	13.2603	23.2467	17.1576	16.2155	no	no	no
2	GRMZM2G364901			15.8059	17.8455	12.3516	8.1816	9.9518	16.54	14.883	8.0087	no	no	no
2	GRMZM2G135256			7.0241	10.5441	3.6632	3.1479	4.9424	9.1048	8.749	5.6928	no	no	no
2	AC226227.2_FG004			0.5397	0.8757	0.1012	0.2177	0.2985	0.6322	0.4318	0.3721	no	no	no
2	GRMZM2G086371			6.3121	11.942	3.8642	3.9189	4.3893	9.4759	8.6602	6.4433	no	no	no
2	GRMZM2G007734			13.6166	13.6512	4.3968	4.7299	4.0942	12.3931	8.4752	6.8021	no	no	no
2	GRMZM2G160752			13.3556	15.1279	8.4753	9.7447	11.7796	18.1224	13.4132	10.1581	no	no	no
2	GRMZM2G311883			1.3674	4.4336	0.9374	0.8564	0.8479	2.8585	1.1094	1.5274	no	no	no
2	GRMZM2G075051			3.8333	4.4393	1.0411	2.2273	0.9355	4.7755	4.2011	3.2837	no	no	no
2	GRMZM2G129451	ss1	starch synthase I	12.53	20.0246	5.9984	5.4674	8.0865	15.0529	16.8322	10.3924	no	no	no
2	GRMZM2G384293			6.907	6.6127	4.2222	3.8337	3.5092	7.3128	6.3441	4.9453	no	no	no
2	GRMZM2G141094			1.2906	1.2621	0.1782	0.1528	0.2486	0.6573	0.4474	0.6229	no	no	no
2	GRMZM5G874736			6.5912	6.791	3.3559	2.8585	1.6848	7.4108	6.934	4.7249	no	no	no
2	GRMZM2G145752			5.4666	6.7368	3.7293	3.382	3.8878	6.8502	6.4107	4.7772	no	no	no
2	GRMZM2G133633			0.5761	0.7787	0.3678	0.4465	0.3388	0.8139	0.7039	0.487	no	no	no
2	GRMZM2G429611			0.1899	1.1575	0.0716	0.0781	0.159	0.7531	0.3734	0.3145	no	no	no
2	GRMZM2G005134			2.006	3.5035	0.8194	0.8357	0.9774	2.3458	2.3602	1.4028	no	no	no
2	GRMZM2G384871			0.8268	1.4058	0.3217	0.3653	0.8488	1.258	1.1202	0.4817	no	no	no
2	GRMZM2G370162			7.0037	16.5266	3.155	2.7415	6.0206	13.1048	10.7686	7.9495	yes	no	no
2	GRMZM2G300624			7.0736	9.5495	1.5923	2.8081	2.5274	9.1921	6.3412	6.0142	no	no	no
2	GRMZM2G468260			12.8328	11.9308	6.0724	6.7777	6.4103	12.4579	11.5347	8.359	no	no	no
2	GRMZM2G013349			3.561	4.2054	1.5722	2.2368	2.2462	4.6395	4.3359	2.8182	no	no	no
2	GRMZM2G174083			0.4935	0.8567	0.19	0.2903	0.2493	0.7219	0.6438	0.5064	no	no	no
2	GRMZM2G399700			9.4894	10.0806	2.4639	1.82	4.8789	9.5481	6.2823	7.2327	yes	yes	no
2	GRMZM5G836827			6.4137	8.5752	1.0849	1.6558	1.9132	6.7623	7.1219	5.142	no	no	no
2	GRMZM2G123796			6.7167	7.3681	3.25	3.9783	3.0933	8.4622	5.7325	5.3508	no	no	no
2	GRMZM2G396169			0.6797	1.2285	0.308	0.7438	0.5852	1.1221	0.0676	0.8214	no	no	no
2	GRMZM2G142873			12.0479	15.7795	6.3164	6.2829	4.4262	11.4691	13.4567	8.1358	no	no	no
2	GRMZM2G422205			7.8754	11.7386	3.7364	5.7383	3.9965	12.0258	6.8799	7.0207	no	no	no
2	GRMZM2G084727			0.7454	1.476	0.4503	0.4317	0.1593	1.0254	0.6123	0.3751	no	no	no
2	GRMZM2G392710			11.9346	19.3626	4.647	5.2706	8.8076	22.002	12.0256	10.0955	yes	no	no
2	GRMZM2G422269			1.0782	1.8441	0.5272	0.2456	0.1226	0.7844	0.5728	0.377	no	no	no
2	GRMZM2G051219			34.0376	45.4859	21.0186	30.2891	17.9858	47.0857	42.946	33.7749	no	no	no
2	GRMZM2G469551			17.5858	22.333	5.356	7.2313	6.6008	18.6824	7.9384	12.3234	no	no	no
2	GRMZM2G546081			3.6537	7.113	2.4929	2.662	2.031	4.4316	5.746	2.3395	no	no	no
2	GRMZM2G154119			7.0792	9.0614	4.6636	4.7376	4.0544	8.9153	7.5714	6.8657	no	no	no
2	GRMZM2G125977			5.8145	10.1259	3.8578	5.9431	3.0803	8.471	9.387	4.2123	no	no	no
2	GRMZM2G418263			3.3371	5.0504	0.7368	0.3665	1.3991	2.3136	2.0838	1.6601	yes	yes	no
2	GRMZM2G115646			16.1907	15.6842	4.0131	6.0505	6.2565	16.3473	12.3507	11.013	no	no	no
2	GRMZM5G820122			20.4832	31.7991	6.7992	9.3613	8.9362	18.474	22.6084	14.8784	no	no	yes
2	GRMZM2G063519			3.4322	4.0796	2.3753	2.2789	2.273	4.6605	3.5076	2.6137	no	no	no
2	GRMZM2G445617			7.4615	8.7967	2.2864	2.7977	3.6001	8.6465	7.0442	3.7275	no	no	no
2	GRMZM2G089948			6.1211	6.5225	2.0555	2.568	2.7268	6.6092	5.5319	2.9745	no	no	no
2	GRMZM2G057743			11.2871	12.4227	6.1186	5.1748	5.6988	13.2825	12.0123	9.1189	no	no	no
2	GRMZM5G809078			6.7322	9.7134	2.7177	3.7824	2.6234	12.0023	6.6354	5.178	no	no	no
2	GRMZM2G022787			6.6199	7.7946	3.5668	2.2613	4.0562	9.6495	6.4633	4.1293	yes	no	no
2	GRMZM2G075096			2.7016	7.0334	1.8647	1.6976	2.6072	5.696	5.4214	2.1434	yes	no	no
2	GRMZM2G163129			24.4868	23.7232	5.9532	8.4168	7.2996	22.6775	19.4172	15.7512	no	no	no
2	GRMZM2G011319			3.6643	6.3435	2.7803	2.6908	2.3839	4.3993	5.1361	2.6778	no	no	no
2	GRMZM2G014240	vpp1	vacuolar proton pump homolog1	127.893	134.159	44.1158	74.2795	57.0533	146.666	99.5804	117.528	no	no	no
2	GRMZM2G147603			6.459	10.014	2.9102	3.5178	4.2513	9.6602	7.7028	5.7287	no	no	no
2	GRMZM2G034828			36.8877	53.7159	25.0799	31.125	20.8137	58.1557	30.1269	45.0818	no	no	no
2	GRMZM2G558078			0.148	0.4764	0.1835	0.0798	0.2655	0.3171	0.2469	0.2165	no	no	no
2	GRMZM5G827026			10.236	12.2693	2.3647	0.8236	5.6711	10.6258	8.1233	6.6841	yes	yes	no
2	GRMZM2G058739			7.7382	7.3081	2.6447	3.1711	4.2652	7.374	5.1528	5.427	no	no	no
2	GRMZM2G412150			4.2103	9.0419	1.7078	1.0328	2.7792	8.7563	4.9131	5.2109	yes	yes	no
2	GRMZM2G076537			21.781	24.9792	5.2906	6.0353	4.9466	19.9871	10.2239	6.4255	yes	no	no
2	GRMZM2G068024			13.8127	13.2221	5.98	5.7536	5.3158	16.9683	17.856	9.1073	no	no	no
2	GRMZM2G430680			40.0329	53.2263	14.3393	14.5423	20.4885	60.6514	27.2466	28.4146	no	no	no
2	GRMZM2G415846			49.5884	53.3906	22.5879	21.7646	29.7705	65.9911	50.9669	36.061	no	no	no
2	GRMZM2G456241			10.6918	12.3743	4.1159	4.1982	7.8273	13.3403	4.0683	3.4923	yes	no	no
2	GRMZM2G037209			1.2579	5.6998	0.479	1.2926	1.1872	4.2144	0.848	2.0759	yes	no	no
2	GRMZM2G055420			6.2697	11.0248	3.1086	6.514	3.9002	10.9152	4.554	9.1971	no	no	no
2	GRMZM2G141587			17.8869	22.1109	6.3729	8.3437	7.4489	23.9854	13.9629	13.3073	yes	no	no
2	GRMZM2G164797			3.756	6.9397	1.9483	2.8773	2.4691	7.0258	4.4848	3.6159	no	no	no
2	GRMZM2G454124			1.5624	1.6399	0.5241	0.4746	0.6861	1.5089	1.5864	1.5756	no	no	no
2	GRMZM2G024499			12.1437	13.1513	5.2942	7.818	5.1483	12.6278	6.5514	7.1716	no	no	no
2	GRMZM2G407837			0.0934	0.2346	0.0472	0.1033	0.0429	0.196	0.1048	0.1023	no	no	no
2	GRMZM5G872204			6.856	7.5458	2.3367	1.8815	2.6097	7.3699	5.6352	4.199	yes	no	no
2	GRMZM2G172158			0.1903	0.464	0.076	0.2355	0.0893	0.4357	0.2163	0.1008	no	no	no
2	GRMZM2G176558			5.2485	5.5391	2.4017	3.6765	9.2841	4.8725	6.2733	5.5842	no	no	no
2	GRMZM2G051894			6.0829	10.0288	2.5874	3.685	2.2366	8.5266	9.3966	6.8837	no	no	no
2	GRMZM2G154165			9.0767	13.6964	4.6333	3.8588	4.264	13.8863	8.8204	6.9912	yes	no	no
2	GRMZM2G305007			1.1859	2.4051	0.7095	0.9137	1.1007	1.4508	1.9579	0.7518	no	no	no
2	GRMZM2G435675			2.1061	3.4839	0.8282	0.4181	1.1728	2.8364	2.6261	3.8384	no	no	no
2	AC212827.3_FG005			0.1171	0.1709	0.0414	0.0776	0.0379	0.096	0.0751	0.0814	no	no	no
2	GRMZM2G158729			7.7537	7.3301	2.6417	3.1713	4.2564	7.3946	5.1507	5.4287	no	no	no
2	GRMZM2G049902			14.8296	17.3877	6.395	6.5617	6.0357	18.4875	19.7578	13.7302	no	no	no
2	GRMZM2G438722			12.3133	16.7572	6.4578	8.8671	5.8526	14.3087	13.3078	9.9763	no	no	no
2	GRMZM2G147849			3.9713	6.973	1.2295	3.0614	1.1596	3.947	3.2589	2.8969	no	no	no
2	GRMZM2G130062			21.0434	24.5943	10.1299	14.5811	9.0531	19.1695	20.6969	14.5277	no	no	no
2	GRMZM2G306043			0.8869	1.0319	0.2964	0.1072	0.4223	1.0316	0.5847	0.4727	no	no	no
2	GRMZM2G417682			4.1691	6.9529	2.1285	2.0491	2.4428	4.966	5.0903	2.9246	no	no	no
2	GRMZM2G340353			6.0476	7.6555	1.7908	4.2059	3.186	7.1258	3.6243	4.6808	no	no	no
2	GRMZM2G126010	act1	actin1	8.3291	8.9591	2.9852	3.7518	4.4097	6.7753	4.0241	5.7316	no	no	no
2	GRMZM2G034120			2.3805	2.5248	1.5367	1.0975	0.8898	2.7871	1.619	1.1763	no	no	no
2	GRMZM2G158097			3.113	4.0703	1.4287	1.8727	1.9064	3.9799	3.6644	2.3621	no	no	no
2	GRMZM2G466292			8.1405	9.8775	2.1363	2.2053	3.6183	8.277	6.3963	6.6462	no	no	no
2	GRMZM2G331368			40.1957	38.6539	8.8663	6.4175	17.5196	35.0752	18.1293	19.7151	yes	no	no
2	GRMZM2G018951			6.1165	15.4969	3.9251	3.6926	5.0473	13.1072	8.6373	8.2546	yes	no	no
2	GRMZM2G048377			40.5287	43.7518	4.3397	4.8517	14.121	24.2363	14.6605	22.4187	yes	yes	no
2	GRMZM2G143590			1.719	2.7064	0.6563	0.9394	0.8913	3.4958	1.4347	1.4342	no	no	no
2	GRMZM2G375675			10.4591	10.7984	4.0852	4.9485	4.2995	12.4834	13.0298	8.3209	no	no	no
2	GRMZM2G085587			0.6482	1.5511	0.3296	0.3094	0.9126	1.1299	0.9947	0.6498	no	no	no
2	GRMZM2G036609	fgs1	ferredoxin-dependent glutamate synthase1	11.3105	16.1802	4.8988	4.5601	4.7437	11.4081	10.6333	6.8105	no	no	no
2	GRMZM2G161380			1.2066	2.2543	0.6537	1.0586	0.6534	2.2329	0.9206	1.0188	no	no	no
2	GRMZM5G851815			1.1624	1.7812	0.622	0.7444	0.6226	1.4719	1.7442	0.7969	no	no	no
2	GRMZM2G146143			16.2098	17.1954	6.3331	10.0409	4.9395	17.1299	15.4646	10.1546	no	no	no
2	GRMZM2G028928			6.1455	7.7318	2.8482	3.7544	3.8275	6.7048	7.6581	5.182	no	no	no
2	GRMZM2G047546			35.7568	52.7392	19.8479	22.7884	19.4198	33.7981	26.6333	13.8331	no	no	no
2	GRMZM2G066565			0	0.0122	0	0	0	0.008	0	0	no	no	no
2	GRMZM2G410191			0.734	1.7148	0.4344	0.5603	0.6003	1.1297	0.9074	0.728	no	no	no
2	GRMZM2G009994			6.0791	10.0319	2.1564	2.4128	3.9528	10.623	7.2502	5.4608	yes	no	no
2	AC204539.4_FG003			7.4235	13.0138	2.2266	5.2921	2.4272	7.5867	6.2466	8.0657	no	no	no
2	GRMZM2G443985			24.8212	31.4468	13.5442	19.6228	14.0239	30.6878	24.5692	21.1537	no	no	no
2	GRMZM2G454081			6.5674	7.668	4.1432	5.8575	2.8998	7.6942	7.6766	4.9479	no	no	no
2	GRMZM2G145370			3.0631	3.2814	1.0638	1.4255	1.7392	3.6047	2.1134	1.9952	no	no	no
2	GRMZM2G048582			1.8233	2.0017	0.5254	1.0949	0.9364	2.0887	1.8096	1.3969	no	no	no
2	GRMZM2G152963			21.5929	32.5974	14.0647	13.6774	13.3043	34.1235	26.1538	20.4221	no	no	no
2	GRMZM2G109674			11.6395	23.1039	8.7569	9.4532	6.6237	14.4017	18.6344	10.9579	no	no	no
2	GRMZM5G892151			1.7819	2.1999	0.6848	0.8323	1.1979	1.9546	2.2742	1.1168	no	no	no
2	GRMZM2G453148			1.402	2.9203	0.5947	1.1175	1.8768	2.4775	0.7983	2.1472	no	no	no
2	GRMZM2G317728			1.014	1.1288	0.3081	0.7195	0.0982	1.091	0.8166	1.3342	no	no	no
2	GRMZM2G405690			5.1121	5.4805	1.5595	1.5776	3.165	4.944	4.5831	2.8252	no	no	no
2	GRMZM2G339344			0.3956	0.588	0.0645	0.5069	0.084	0.6647	0.2159	0.382	no	no	no
2	GRMZM2G149932			5.9759	7.3634	3.8226	4.256	2.5033	6.2553	6.9909	5.1128	no	no	no
2	GRMZM2G154845			2.9006	3.2728	1.5147	2.3195	1.0663	3.325	2.3929	1.8394	no	no	no
2	GRMZM2G386802			7.2891	8.1253	3.2782	2.3795	3.1351	7.0707	5.1505	4.5751	yes	no	no
2	GRMZM2G393146			7.665	7.9678	3.4618	4.1256	3.439	7.4958	8.0706	3.5214	no	no	no
2	GRMZM2G309568			4.3634	3.9754	2.2025	1.7972	1.5877	4.7399	4.6014	3.4327	no	no	no
2	GRMZM2G112912			295.923	315.892	129.899	206.185	90.6494	351.274	235.894	266.679	no	no	no
2	GRMZM2G061681			15.4104	17.6966	8.4637	8.3897	7.3447	21.7763	17.7179	11.357	no	no	no
2	GRMZM2G306851			1.404	1.7977	0.0452	0.075	0.0312	0.6259	0.0905	0.865	no	no	no
2	GRMZM2G023190			2.1144	2.939	0.4131	0.472	0.5584	1.478	1.3819	0.8583	no	no	no
2	GRMZM2G312110			12.6112	25.1386	5.3193	3.2461	8.4414	22.5238	15.4718	13.7212	no	yes	no
2	GRMZM2G057522			9.5341	11.7571	4.5529	3.3713	6.0043	8.67	5.3728	9.9928	no	no	no
2	GRMZM2G018578			1.3001	1.2802	0.4562	0.5507	0.6128	1.4212	1.3926	1.3385	no	no	no
2	GRMZM2G481201			1.4801	2.4487	0.2341	0.6647	0.7433	1.5122	0.9439	1.0595	no	no	no
2	GRMZM2G089959			1.4761	2.1873	0.625	0.4888	0.8437	1.0644	1.2012	1.1618	no	no	no
2	GRMZM2G021710			2.0758	2.6618	1.2659	1.1704	1.6045	2.6647	2.5244	1.9622	no	no	no
2	GRMZM2G020986			14.2743	13.2397	3.6897	3.5657	3.5239	15.2825	11.2912	9.257	yes	no	no
2	GRMZM2G140970			22.1878	27.1607	10.5502	13.9458	9.8764	24.6996	26.3994	22.3303	no	no	no
2	GRMZM2G146697			22.1806	24.2687	7.4512	10.3671	9.5497	29.2847	16.6675	17.1249	no	no	no
2	GRMZM2G110085			2.5001	3.2432	1.2996	1.3369	1.8931	3.5189	2.4533	2.4069	no	no	no
2	GRMZM2G470556			7.8557	7.3106	2.5675	2.8191	2.4814	7.8576	5.9231	6.7334	no	no	no
2	GRMZM2G154626			2.8213	3.3662	1.5689	1.8108	1.4942	3.9084	2.1896	1.6092	no	no	no
2	GRMZM2G464137			51.6509	51.4716	20.7038	35.8674	23.3142	53.8561	43.0615	38.5164	no	no	no
2	GRMZM2G316967			11.5535	14.1352	3.2356	3.6827	2.9495	9.2976	8.3971	7.2576	no	no	no
2	GRMZM2G175504			7.5723	9.8601	2.2029	2.6955	2.7718	12.2318	6.9136	6.0212	yes	no	no
2	GRMZM2G021498			18.3109	30.9967	6.5971	9.2436	8.3594	31.4783	10.862	12.2607	no	no	no
2	GRMZM5G894029			0.9346	2.4667	0.606	0.5458	0.4877	1.3333	1.4049	0.4967	no	no	no
2	GRMZM2G011364			12.3351	11.4804	5.9233	7.2003	5.0693	12.5706	10.1405	8.2235	no	no	no
2	GRMZM2G464572			9.4883	12.2117	4.0047	3.4793	5.5674	8.596	7.4719	6.416	no	no	no
2	GRMZM2G086093			8.2104	9.913	3.1307	3.7889	5.559	11.5057	6.5514	5.2354	yes	no	no
2	GRMZM2G015959			2.2605	4.0241	0.6362	1.5304	0.9235	3.1329	3.1172	1.8621	no	no	no
2	GRMZM2G410644			1.2633	1.662	0.7445	1.034	0.6811	1.4998	1.4516	1.3094	no	no	no
2	GRMZM2G157729			24.8356	33.631	7.153	11.0235	7.0126	20.697	26.9358	13.5261	no	no	no
2	GRMZM2G131070			3.6662	4.0087	1.5231	1.9767	1.8224	3.4619	3.1922	2.2479	no	no	no
2	GRMZM2G358381			2.0464	3.6932	1.1645	0.7288	1.2426	2.7754	2.7581	1.1741	no	no	no
2	GRMZM2G053554			24.1103	21.7886	9.1398	10.9381	7.0737	25.9082	20.038	14.7346	no	no	no
2	GRMZM2G399207			11.4616	16.7375	3.6724	5.7054	8.9975	8.1325	9.3153	11.4862	no	no	no
2	GRMZM2G116881			7.583	9.3638	1.224	3.7093	2.6003	7.3145	1.8886	4.9514	no	no	no
2	GRMZM2G362850			28.7259	33.8328	16.7014	19.3808	17.0383	41.6592	27.7257	22.4668	no	no	no
2	GRMZM2G052088			54.2395	61.8851	23.3511	35.2546	29.1508	69.1422	54.2433	51.0887	no	no	no
2	GRMZM2G030528			2.5577	7.0668	1.588	2.4842	2.5637	5.7388	4.8569	2.2115	no	no	no
2	GRMZM2G387890			13.1544	18.8482	1.9605	0.7967	5.1942	8.1747	5.1499	7.3397	yes	yes	no
2	GRMZM2G363474			36.1375	44.1648	24.805	32.4415	20.2604	47.9277	29.7516	33.9628	no	no	no
2	GRMZM2G400005			0.9399	1.2399	0.8204	0.8409	0.6305	1.4428	0.5888	0.8089	no	no	no
2	GRMZM2G031952			8.9843	12.8776	4.4399	5.6666	4.7579	10.3937	12.0448	7.4134	no	no	no
2	GRMZM2G058450			60.2245	65.7345	27.8035	36.703	23.586	47.8693	23.719	35.485	no	no	no
2	GRMZM5G868168			5.9771	5.8939	2.2821	2.7262	2.5205	6.7528	5.9565	4.0248	no	no	no
2	GRMZM2G454594			9.2154	9.2285	0.8749	1.0323	2.7977	6.6331	4.7875	4.1956	yes	no	no
2	GRMZM2G004858			2.7175	3.2476	1.2579	2.9503	1.645	2.8407	2.1506	1.5315	no	no	no
2	GRMZM2G703437			0.0734	0.1662	0.0256	0.0738	0.1129	0.1386	0.0218	0.0439	no	no	yes
2	GRMZM2G107987			15.9233	22.0581	2.9545	4.3671	4.5658	12.2078	11.4087	6.2027	no	no	no
2	GRMZM2G139828			2.5956	3.7674	1.7409	2.0861	1.4374	3.2427	3.2787	2.2785	no	no	no
2	GRMZM2G364178			6.1491	19.2032	4.5135	4.8018	6.109	12.4586	14.3418	4.216	no	no	no
2	GRMZM5G889999			14.6588	14.2525	8.2296	9.7915	6.8515	16.2589	15.582	10.9926	no	no	no
2	GRMZM2G342647			0.1768	0.3597	0.0579	0.1749	0.0935	0.3969	0.1232	0.1882	no	no	no
2	GRMZM2G060070			1.301	1.3847	0.4347	1.4175	0.7899	1.3992	1.0815	1.007	no	no	no
2	GRMZM2G013115			14.5014	20.2362	12.2539	12.265	9.17	19.2278	13.8713	18.0383	no	no	no
2	GRMZM2G105855			6.2822	8.0212	2.3878	2.824	2.5461	7.1174	7.0007	3.817	no	no	no
2	GRMZM2G368206			13.7428	17.9981	7.0977	7.0038	7.0966	17.5009	8.8256	12.8093	yes	no	no
2	GRMZM2G170013			10.2268	11.3179	4.968	5.5118	5.9003	12.4668	11.8998	7.9593	no	no	no
2	GRMZM2G100716			7.477	9.4036	4.0062	3.5241	3.934	8.5119	8.8793	4.1452	yes	no	no
2	GRMZM2G167220			0.1768	0.6456	0.0955	0.0182	0.1066	0.4685	0.1788	0.1699	yes	yes	yes
2	GRMZM2G115812			21.9405	48.5312	12.1464	11.5215	19.9829	40.5359	20.1002	23.8592	no	no	no
2	GRMZM2G052569			43.5598	51.9427	26.5896	29.6787	23.6084	51.3076	42.387	37.339	no	no	no
2	GRMZM2G448523			4.5942	4.4528	1.4352	1.8544	1.8931	5.1832	3.4319	3.0824	no	no	no
2	GRMZM2G381709			10.0013	12.9056	4.3176	3.7098	5.8647	9.9667	8.3192	7.0788	no	no	no
2	GRMZM5G827485			2.5254	2.544	0.8959	1.0975	1.263	2.366	2.351	1.6391	no	no	no
2	GRMZM2G003625			3.9583	3.7022	1.3926	1.1004	1.7165	3.141	3.682	2.1222	no	no	no
2	GRMZM2G000281			0	0.1546	0	0	0	0.0852	0	0	yes	no	no
2	GRMZM2G025531			7.3968	7.3078	2.2887	2.7644	2.2768	6.88	5.2792	4.2994	no	no	no
2	GRMZM2G040511			4.1472	4.677	2.2049	1.7047	3.0167	3.5169	3.5901	2.645	no	no	no
2	GRMZM2G099160			10.9314	11.0731	4.1258	4.1653	3.8586	7.7203	6.2786	4.7981	no	no	no
2	GRMZM2G019901			4.1193	4.5154	1.5401	1.6372	1.5081	3.6219	3.1718	2.1983	no	no	no
2	GRMZM2G174589			27.214	29.5929	13.9462	19.254	17.5424	33.2722	25.8251	19.8991	no	no	no
2	GRMZM2G175474			1.6092	2.1052	0.9221	0.9575	1.5701	2.3274	1.6398	1.4021	no	no	no
2	GRMZM2G152025			3.0306	4.8971	1.9636	2.7517	1.8192	4.0262	3.6448	2.2821	no	no	no
2	GRMZM2G095810			9.6107	10.3004	2.8061	4.457	3.0235	10.6957	9.5576	6.6137	no	no	no
2	GRMZM2G055917			12.6959	17.1976	7.7103	10.4707	6.8	18.9938	14.033	11.7341	no	no	no
2	GRMZM2G088007			1.3848	3.0428	0.443	0.7085	1.2252	2.0398	1.4228	1.645	no	no	no
2	GRMZM2G154041			0.9753	1.5418	1.0309	0.4639	1.5062	1.1446	0.6652	1.0713	no	no	no
2	GRMZM2G047626			1.0135	2.2014	0.1834	0.3424	0.2476	0.8629	0.6297	0.5247	no	no	no
2	GRMZM2G161035			1.9993	2.6854	1.0523	1.3997	1.341	2.6857	2.0398	2.4401	no	no	no
2	GRMZM2G145107			5.0021	9.4206	3.4968	4.3093	3.0732	6.8127	6.6687	3.5044	no	no	no
2	GRMZM2G055507			10.075	17.2933	4.2009	6.9377	3.9439	10.4481	12.4198	7.619	no	no	no
2	GRMZM2G020040			8.2349	12.1187	4.1188	4.9155	5.1078	6.6894	9.1821	7.0991	no	no	no
2	GRMZM2G064386			14.7714	21.0785	7.1857	9.4423	8.4299	20.0736	10.7529	14.1874	no	no	no
2	GRMZM2G070126			4.3986	11.483	1.789	1.218	3.8306	5.8522	3.6182	4.2735	yes	yes	no
2	GRMZM2G007715			1.3799	3.1188	0.6382	0.8629	1.0147	2.3554	1.2995	2.0995	no	no	no
2	GRMZM2G035517			1.5473	2.5814	0.2872	0.3634	0.5696	1.8215	1.0991	1.1002	no	no	no
2	GRMZM2G102760			30.1923	34.406	9.416	19.8919	10.5115	41.2041	9.5691	21.0607	no	no	no
2	GRMZM2G399750			2.3058	2.4608	0.6243	1.1477	0.8101	2.1411	1.3774	1.4163	no	no	no
2	GRMZM5G871457			0.1043	0.239	0.0847	0.0658	0	0.1589	0.0538	0.0155	no	no	no
2	GRMZM2G012923			11.5862	10.5111	4.4953	4.272	5.5924	9.1319	8.8872	7.0108	no	no	no
2	GRMZM2G079428			5.2112	6.0843	3.0358	2.9389	2.2848	4.6819	4.4404	3.0435	no	no	no
2	GRMZM2G065899			2.7148	3.2332	0.7817	1.4583	0.8598	2.282	2.4055	1.0341	no	no	no
2	GRMZM2G102181			6.2372	10.1614	2.2197	2.9689	2.9154	11.0244	6.573	4.481	no	no	no
2	GRMZM2G377539			45.4126	46.3608	18.5537	18.1971	20.8112	35.67	23.8728	16.5684	yes	no	no
2	GRMZM2G470292			31.6568	32.2896	9.4925	10.1628	15.3466	34.5308	26.0996	21.1797	yes	no	no
2	GRMZM2G347635			0.1947	0.377	0.045	0.1657	0.0582	0.2417	0.3074	0.2265	no	no	no
2	GRMZM2G055992			5.2306	6.233	2.0725	2.9452	1.2821	4.1612	5.1819	2.7493	no	no	no
2	GRMZM2G156910			5.6626	7.4584	1.8817	2.1853	3.5559	9.1056	5.3071	4.3461	yes	no	no
2	GRMZM2G393935			1.0321	2.9631	0.6506	0.4898	0.5925	1.525	1.151	0.5667	no	no	no
2	GRMZM2G149994			8.7143	12.9695	6.6	7.0426	6.688	12.1732	11.7919	6.6418	no	no	no
2	GRMZM2G091560			6.8788	8.2327	2.0959	3.7968	3.3076	9.8781	5.8502	5.8381	no	no	no
2	GRMZM2G050394			7.0911	9.0097	3.4497	2.6773	3.0246	6.3357	4.7703	4.6675	no	no	no
2	GRMZM2G162859			6.7364	9.0637	4.4786	3.3257	6.2413	9.2099	6.9497	6.8493	yes	no	no
2	GRMZM2G035985			28.2693	32.6063	11.7719	14.0939	13.9062	38.2193	27.5363	23.1508	no	no	no
2	GRMZM2G154811			15.876	13.4732	3.1876	2.9697	6.7417	13.4034	12.3308	9.3347	no	no	no
2	GRMZM2G140587			6.049	6.2885	2.0711	2.7116	2.5708	7.7924	7.3754	4.391	no	no	no
2	GRMZM2G147446			11.7751	13.1919	5.0024	7.7238	4.9066	14.3935	8.8322	8.3808	no	no	no
2	GRMZM2G007680			8.0232	10.7265	3.6546	3.9605	3.5074	12.2317	6.8147	4.7874	no	no	no
2	GRMZM2G142437			1.8845	4.2132	1.222	1.2376	1.2472	3.6865	3.1048	1.6619	no	no	no
2	GRMZM2G149969			0.5233	0.5142	0	0.14	0.2825	0.7006	0.2799	0.1526	no	no	no
2	GRMZM2G013588			2.5988	4.4248	1.3306	1.038	1.4412	2.3309	2.533	1.7581	no	no	no
2	AC148152.3_FG008			0.1616	0.5082	0.2913	0.3137	0.1215	0.5475	0.1041	0.0927	no	no	no
2	GRMZM2G049954			3.0911	3.5914	1.1724	0.8025	1.5385	3.2039	2.453	1.4167	no	no	no
2	GRMZM2G409224			16.2279	35.7071	5.7789	7.1239	12.1722	36.3767	14.5006	21.2133	yes	yes	no
2	GRMZM2G316740			1.9572	3.1067	0.6635	0.3424	0.7736	1.5034	1.4913	1.5867	no	no	no
2	GRMZM2G358877			20.7319	19.196	4.4973	3.2425	10.9825	20.6205	16.8452	16.2581	yes	yes	no
2	GRMZM2G426847			3.5087	9.9847	1.6956	1.5727	2.2164	4.4689	4.2275	3.0966	no	no	no
2	GRMZM2G033828			30.1051	42.2744	11.6457	14.4755	15.3844	31.6571	20.1469	21.8229	no	no	no
2	GRMZM2G107689			34.8259	35.1207	22.2708	23.7673	17.9267	37.5779	29.6429	24.6376	no	no	no
2	GRMZM2G010093			11.108	12.3571	4.5109	6.5642	5.6605	11.6707	9.6064	7.9896	no	no	no
2	AC152495.1_FG003			3.452	3.0095	1.1132	0.9787	1.4058	3.0065	3.1873	1.9203	no	no	no
2	GRMZM5G862277			0.3304	0.4442	0.156	0.2094	0.2153	0.5018	0.3302	0.2677	no	no	no
2	GRMZM2G128648			4.459	5.5106	1.9709	2.6694	2.7868	6.0637	5.1947	3.4748	no	no	no
2	GRMZM2G455816			2.3731	5.0424	1.3083	1.0097	2.7339	4.2649	3.4256	2.9469	no	no	no
2	GRMZM2G137984			12.0655	12.6955	4.828	6.3062	4.6957	11.3308	12.1244	8.2654	no	no	no
2	GRMZM2G081622			5.8548	9.1995	1.935	3.0373	2.1632	9.6492	8.5408	5.1831	no	no	no
2	GRMZM2G164185			9.8342	15.4007	4.4431	4.9417	4.7467	15.9626	13.9206	8.1936	yes	no	no
2	GRMZM2G096553			8.6987	11.6176	4.9037	4.8588	6.8318	12.2069	9.892	7.8799	no	no	no
2	GRMZM2G080156			3.0358	7.8545	2.3517	2.8947	2.2706	4.9501	5.3619	2.4859	no	no	no
2	GRMZM2G501086			0.6106	1.2337	0.0677	0.3097	0.1233	0.5946	0.8216	0.6811	no	no	no
2	GRMZM2G057768			3.8133	4.1922	1.8033	3.4363	1.6299	4.7549	3.9141	2.5813	no	no	no
2	GRMZM2G416498			3.564	3.5436	0.839	1.2956	1.088	2.9368	2.7329	1.4178	no	no	no
2	GRMZM2G306348			7.4263	7.2277	2.1239	3.1138	2.6879	6.2178	5.3488	4.6011	no	no	no
2	GRMZM2G162605			3.7379	8.0398	1.9391	3.4801	1.6444	7.9936	4.7684	3.8894	no	no	no
2	GRMZM2G304362			54.4611	65.3293	15.8119	22.9963	21.2521	68.6042	45.8986	43.4079	no	no	no
2	GRMZM2G461141			0.2484	0.3229	0.1307	0.075	0.0442	0.3111	0.2965	0.3455	no	no	no
2	GRMZM2G177812			17.6058	18.5876	8.1768	8.823	7.7632	15.8215	10.338	7.1782	no	no	no
2	GRMZM2G115198			7.8367	7.865	4.1332	4.4178	2.765	5.734	5.7637	4.6078	no	no	no
2	GRMZM2G056103			37.78	41.4513	15.3862	16.2305	14.7638	35.9462	29.0536	24.701	no	no	no
2	GRMZM2G123652			3.3929	4.3037	2.0692	2.6525	1.4082	3.8169	2.8196	2.4581	no	no	no
2	GRMZM2G142150			7.3205	7.0831	2.2696	2.2532	2.3686	4.6588	5.6818	2.2288	no	no	no
2	GRMZM2G004468			15.0784	17.8633	6.4483	6.0361	7.4613	13.5563	11.1797	10.236	no	no	no
2	GRMZM2G137894			3.2784	3.9499	1.1691	0.7223	0.9211	2.5857	2.7539	1.3864	no	no	no
2	GRMZM2G063850			54.5327	73.3285	39.1263	36.2374	31.5484	66.5666	75.4514	50.3952	no	no	no
2	GRMZM2G475362			3.0253	7.0632	1.1816	0.7774	2.1466	5.5122	3.3516	3.3446	yes	no	no
2	GRMZM2G027665			0.6234	1.0836	0.1186	0.2459	0.3276	0.8862	0.5347	0.1607	no	no	no
2	GRMZM2G022506			3.834	5.359	1.9559	3.1905	2.7877	5.924	3.7385	3.2074	no	no	no
2	GRMZM2G368678			2.1859	4.7441	0.6848	0.5671	1.2374	3.9431	3.6388	2.2205	yes	no	no
2	GRMZM2G167718			5.5377	5.8342	3.2629	3.2493	2.6856	5.9019	4.978	4.1203	no	no	no
2	GRMZM2G431691			1.353	1.7542	1.704	0.6132	1.1865	2.2699	0.7609	0.95	no	no	no
2	GRMZM2G124886			17.1174	27.6231	8.816	7.8716	8.7364	25.9016	18.5742	15.2961	no	no	no
2	GRMZM2G089673			2.4863	4.673	1.6889	2.6506	0.7959	3.9575	2.0176	3.4263	no	no	no
2	GRMZM2G155532			12.6953	17.3324	8.284	7.6804	7.3676	17.0775	9.8631	9.5804	no	no	no
2	GRMZM2G096092			16.0987	15.1382	5.5292	5.8975	6.2559	11.9557	16.951	9.9839	no	no	no
2	AC233864.1_FG014			1.7913	2.3455	0.7788	0.7446	0.8873	2.6919	1.8709	1.4698	no	no	no
2	GRMZM2G122108			3.2327	5.1128	1.5231	2.1664	1.4627	5.0473	2.3716	2.8477	no	no	no
2	GRMZM2G092776			5.9011	9.9389	4.9919	5.9968	3.8103	8.6046	7.7936	5.3016	no	no	no
2	GRMZM2G120661			0.5513	0.9368	0.2734	0.1713	0.2382	0.4478	0.3134	0.4473	no	no	no
2	GRMZM2G367023			4.9681	10.0901	1.2116	1.4543	3.2884	4.8539	3.329	4.7261	no	no	no
2	GRMZM2G166718			3.6073	5.4106	2.0246	2.2545	2.3246	3.879	4.1188	1.5996	no	no	no
2	GRMZM2G177213			0.9984	1.6487	0.5348	0.6097	0.3958	1.5181	0.8755	0.6475	no	no	no
2	GRMZM2G025231	cesa7	cellulose synthase7	6.6302	8.288	3.0767	3.0722	4.1093	8.7268	5.4565	4.9185	no	no	no
2	GRMZM2G125151			5.527	7.6276	2.4079	3.4235	3.6678	5.1845	3.1356	5.1855	no	no	no
2	GRMZM2G135073			2.5301	3.4889	0.793	1.0497	0.9135	2.7954	1.1149	1.0005	no	no	no
2	GRMZM2G431723			0.2941	0.3869	0.097	0.1199	0.1969	0.2557	0.2423	0.1095	no	no	no
2	GRMZM2G021074			5.0433	5.7574	3.6996	4.158	2.5367	6.6318	5.5003	2.9375	no	no	no
2	GRMZM2G405804			5.3372	9.2291	3.0149	2.2559	3.038	8.7123	5.2967	7.078	yes	yes	no
2	GRMZM2G128665			7.7604	8.7955	4.133	6.179	2.956	7.6543	5.7095	6.231	no	no	no
2	GRMZM2G128477			15.1757	16.2047	6.8013	8.692	7.9733	19.0999	13.9131	12.0359	no	no	no
2	AC199526.5_FG003	caf2	crs2 associated factor2	4.0454	3.9186	2.1201	2.2198	1.4456	3.871	3.4623	2.482	no	no	no
2	GRMZM2G149224			14.6283	13.4363	4.6013	6.6535	7.4059	13.9269	13.1915	8.6645	no	no	no
2	GRMZM2G156800			15.4453	15.1886	4.9137	7.3813	7.4043	17.4847	12.5449	9.8432	no	no	no
2	GRMZM2G416184			6.4231	9.4447	5.4757	4.9063	3.3725	9.7444	6.0155	7.4238	no	no	no
2	AC194264.3_FG006			1.5079	3.2997	0.2657	1.1252	0.8017	2.0566	0.8966	1.9977	no	no	no
2	GRMZM2G113205			1.335	1.6104	0.6618	0.9814	0.4296	1.3413	0.8423	1.0183	no	no	no
2	GRMZM2G438077			1.3486	2.046	0	0.6069	0.1682	0.9659	0.3747	0.5582	no	no	no
2	GRMZM2G451672			9.0057	9.3152	3.8233	4.0251	5.0517	10.4553	5.7715	5.6833	yes	no	no
2	GRMZM2G414866			16.5597	16.4194	3.8403	4.2773	4.7044	10.9818	12.4971	6.4027	no	no	no
2	GRMZM2G398057			8.3275	12.9003	3.3848	2.1679	4.4077	8.5215	4.0461	2.7786	no	no	no
2	GRMZM2G105787			12.9351	13.532	5.9822	6.4193	5.521	14.0448	12.6844	7.0565	no	no	no
2	GRMZM2G084525			12.7877	15.7006	4.9426	4.626	7.3682	15.4451	10.7662	10.6399	no	no	no
2	GRMZM2G074818			11.7944	17.4972	5.5655	5.5716	8.1856	19.8772	9.905	9.6652	yes	no	no
2	GRMZM2G178254			13.8134	13.9285	3.5297	5.7375	4.2751	11.0811	9.2658	5.3343	no	no	no
2	GRMZM2G078274			69.0656	99.7167	26.6233	59.3678	19.895	76.1912	20.0799	48.0969	no	no	no
2	GRMZM2G126266			16.2241	19.9291	10.9934	8.0052	9.1926	16.8991	20.1807	11.4872	no	no	no
2	AC198490.3_FG003			0.3922	0.6934	0	0	0.3123	0.3542	0	0	no	no	no
2	GRMZM2G458266			9.5436	9.9501	2.9719	3.4635	3.1475	6.6221	8.5409	4.0589	no	no	no
2	GRMZM2G158281			21.241	19.9779	8.7872	11.4912	9.9731	21.2133	17.3335	15.9316	no	no	no
2	GRMZM2G403493			0.9731	1.6794	0.1696	0.3808	0.4301	1.3971	0.4885	0.8856	no	no	no
2	GRMZM2G145772			1.5101	7.1352	0.946	1.82	2.0834	5.322	1.8506	3.4946	no	no	no
2	GRMZM2G074103			3.6577	4.817	2.6511	2.1984	1.657	4.2156	4.4606	2.8745	no	no	no
2	GRMZM2G057567			2.0826	2.7862	1.1148	1.1048	1.5884	2.8606	1.9669	1.4822	no	no	no
2	GRMZM2G013657			9.204	14.2381	5.2397	8.4377	6.109	10.7266	10.4669	8.0634	no	no	no
2	GRMZM2G004040			5.4655	7.783	2.6384	2.4328	2.3819	6.3524	6.8134	3.4532	no	no	no
2	GRMZM2G166976			11.1434	12.8267	5.5936	10.4256	7.721	12.4547	9.4858	12.1996	no	no	no
2	GRMZM2G352431			7.5578	10.3673	3.4565	2.8883	5.87	12.0029	7.0497	6.4525	yes	no	no
2	GRMZM2G066885			5.1421	7.8709	2.3939	3.8439	3.0526	6.2908	3.7708	2.6052	no	no	no
2	GRMZM2G044044			17.6684	17.7044	5.0599	7.1463	4.7548	18.2705	16.5336	11.1588	no	no	no
2	GRMZM2G172365			1.3248	2.0418	0.4823	1.0729	0.8866	2.4359	1.0775	0.885	no	no	no
2	GRMZM2G025126			2.2706	4.1812	1.7504	1.3533	1.5053	3.5107	3.5029	1.8665	no	no	no
2	GRMZM2G166024			0.8956	0.9581	0.3331	0.9406	0.2824	0.7565	0.7189	0.678	no	no	no
2	GRMZM2G450206			2.8692	3.9219	1.4236	1.9008	0.923	2.7768	2.0638	3.3011	no	no	no
2	GRMZM2G107645			25.0457	25.1921	7.2292	9.8147	9.6513	27.5493	14.484	18.3223	yes	no	no
2	GRMZM2G380456			1.1277	3.1496	0.2651	0.2099	0.6068	1.5488	1.0824	1.0315	yes	no	no
2	GRMZM2G049088			4.0751	6.5842	2.6114	3.1024	2.346	5.7513	4.5767	3.0337	no	no	no
2	GRMZM2G111355			2.4901	5.3288	0.5316	1.0424	1.6218	3.2425	1.7707	2.8851	no	no	no
2	GRMZM5G893216			10.9832	14.1306	3.0411	7.8483	6.1783	15.4616	10.3656	10.3056	no	no	no
2	AC190915.3_FG007			4.8416	6.8943	4.788	1.9255	4.271	5.4925	5.2526	4.1345	no	no	no
2	GRMZM2G316679			0.4743	1.2036	0.1544	0.2263	0.146	0.9238	0.8692	0.7406	no	no	no
2	GRMZM5G806784			10.552	11.7377	4.4027	5.0397	5.3987	10.3538	5.5069	6.6749	no	no	no
2	GRMZM2G170412			8.7985	8.9151	2.8066	4.3682	3.8272	11.3143	8.612	5.8272	no	no	no
2	GRMZM5G892365			1.0904	1.6972	0.5091	0.6419	1.7952	1.6118	1.1359	1.0078	no	no	no
2	GRMZM2G399858			9.4643	14.0509	5.2434	6.5305	5.1263	11.4868	10.0304	7.9167	no	no	no
2	GRMZM2G091696			0.8056	1.7023	0.2684	0.3377	0.4057	1.8917	0.9122	0.7066	no	no	no
2	GRMZM2G119894			8.0816	12.8925	5.8134	8.3997	6.0242	13.5947	7.3257	9.5005	no	no	no
2	GRMZM2G170591			16.3231	16.2757	6.0588	9.2914	7.6824	18.14	14.3795	13.8161	no	no	no
2	GRMZM2G480480			13.729	19.6843	5.2335	6.9309	7.041	19.1654	15.1635	11.2797	no	no	no
2	GRMZM2G011078			1.8024	2.8822	1.1124	0.8759	1.1651	1.922	2.4833	1.3265	no	no	no
2	GRMZM2G154664			1.6009	2.4978	0.8637	1.0274	0.778	2.2497	1.627	1.4662	no	no	no
2	AC191961.3_FG009			1.3769	2.1719	0.4469	0.3705	1.3055	1.8866	1.1066	1.3104	no	no	no
2	GRMZM2G053196			1.0318	1.6779	0.4907	0.7048	0.7246	1.3675	1.205	0.9774	no	no	no
2	GRMZM2G012046			0.4586	0.9922	0.2443	0.6006	0.2306	0.8636	0.2762	0.2783	no	no	no
2	GRMZM2G158308			2.2564	2.3451	0.9243	0.8267	0.9614	2.1954	1.5546	1.2307	no	no	no
2	GRMZM2G139691			4.5285	5.7842	3.8643	2.3337	3.873	4.8236	4.3489	2.5972	no	no	no
2	GRMZM2G065388			6.6425	8.4748	3.2667	1.6373	2.7242	7.6993	6.2001	4.2234	yes	no	no
2	GRMZM2G462808			0.3292	1.0089	0.5165	0.2533	0.2652	0.6161	0.6968	0.4446	no	no	no
2	GRMZM2G082384			34.7111	50.949	15.8388	24.5769	21.2413	55.5434	30.9855	38.9059	no	no	no
2	GRMZM2G117482			6.316	6.5764	5.4357	4.8633	3.8001	7.6324	6.9617	3.8801	no	no	no
2	GRMZM5G858094	acc1	acetyl-coenzyme A carboxylase1	21.0445	33.2075	8.9028	8.4014	15.2376	38.6778	17.0478	18.9349	yes	no	no
2	GRMZM2G071441			9.1939	16.624	3.2025	2.8332	5.5435	14.4737	13.1222	7.8344	yes	no	no
2	GRMZM2G104504			15.8692	15.5151	5.4161	5.502	6.8819	17.1852	14.6045	13.4173	no	no	no
2	GRMZM2G082683			1.5984	3.2625	1.4377	1.2331	1.2034	2.7382	1.6788	1.3616	no	no	no
2	GRMZM2G119725			11.6231	15.039	6.7123	6.2319	7.5938	16.5178	11.333	10.3934	yes	no	no
2	GRMZM2G091373			0.8664	0.9991	0.5621	0.5731	0.2941	1.1592	0.7375	0.6912	no	no	no
2	GRMZM2G181568			7.1307	9.6995	2.7482	4.4113	2.1756	6.5072	4.9633	5.1991	no	no	no
2	AC225308.2_FG005			1.1158	2.0434	0.5347	0.4261	0.7549	1.5616	1.2753	1.1521	no	no	no
2	GRMZM2G362785			0.8498	1.9578	0.4074	0.2363	0.6228	1.127	0.9751	0.7017	no	no	no
2	GRMZM2G331088			2.7452	4.6057	0.458	0.5158	1.22	2.7527	2.0048	1.4826	yes	no	no
2	GRMZM2G016923			27.6824	37.1403	10.6289	19.1661	14.4471	38.5187	25.3963	26.995	no	no	no
2	GRMZM2G021299			7.838	11.5143	2.9018	1.7432	4.9204	9.02	5.3775	4.6632	yes	no	no
2	GRMZM2G124335			55.6131	70.7704	24.9594	34.4779	31.7824	78.8912	47.8483	52.6278	no	no	no
2	GRMZM2G027867			30.1631	45.0355	18.5685	13.9672	20.963	44.4731	30.1111	26.1369	yes	no	no
2	GRMZM2G051659			4.6523	6.3244	1.7876	3.7424	0.762	5.2953	5.4402	2.5356	no	no	no
2	GRMZM2G356817			4.3673	11.0351	1.1217	1.2326	2.8219	6.6014	4.2387	3.3357	yes	no	no
2	GRMZM2G480380			2.4592	2.6382	1.8233	1.3865	0.6473	2.3105	1.4262	1.7611	no	no	no
2	GRMZM2G056365			5.7361	7.254	1.9274	2.6681	2.5079	6.2238	5.4807	3.9736	no	no	no
2	GRMZM2G127350			29.5918	33.9803	7.8843	11.2956	8.8112	35.4915	18.8504	13.5733	no	no	no
2	GRMZM5G899300			73.1801	79.4928	29.1786	43.6587	35.5907	95.5288	71.2561	59.0169	no	no	no
2	GRMZM2G072569			69.4224	65.0861	36.1095	43.6563	35.4084	67.5504	66.9512	56.9419	no	no	no
2	GRMZM2G379913			22.8522	23.8068	4.1301	3.4217	8.8766	20.9282	12.5896	16.603	yes	yes	no
2	GRMZM2G470914			12.7291	13.5267	3.2995	4.4906	3.9218	9.1273	6.2696	7.0281	no	no	no
2	GRMZM2G005195			1.5901	2.4816	0.5752	0.8754	1.012	2.2739	1.877	1.4663	no	no	no
2	GRMZM2G429231			1.0373	3.6173	0.6915	0.5249	0.6184	1.8717	1.0922	1.1174	yes	no	no
2	GRMZM2G078275			8.6891	12.2894	3.7431	4.019	5.1025	14.2417	8.6475	8.4813	no	no	no
2	GRMZM2G117754			3.6147	4.0887	1.6455	2.0971	1.8789	4.5872	3.4419	3.0098	no	no	no
2	GRMZM2G451325			2.922	3.6462	1.7444	1.8732	1.2521	3.4186	3.4841	2.4196	no	no	no
2	GRMZM2G108457			1.5422	2.3713	0.5117	0.6708	0.7536	1.627	1.7678	0.7443	no	no	no
2	GRMZM2G312974			8.7636	14.5488	2.1748	1.5889	4.6738	12.1062	10.645	7.7056	yes	yes	no
2	AC217121.3_FG007			4.3538	3.9492	2.3548	1.4742	1.5899	3.6473	3.9519	2.8535	no	no	no
2	GRMZM2G085000			3.762	4.2756	1.3822	1.9642	1.0217	3.4582	4.1886	1.5706	no	no	no
2	GRMZM2G178215			7.729	10.4029	7.0574	7.9211	4.3434	9.777	8.3099	6.2019	no	no	no
2	GRMZM2G132504			4.6553	7.5106	3.305	2.2989	2.9959	6.4412	4.5787	3.6445	no	no	no
2	GRMZM2G132780			9.8591	12.8171	4.1984	5.6972	4.3016	11.3802	10.0903	6.5789	no	no	no
2	GRMZM2G084513			4.0747	4.8532	1.8236	1.764	3.5064	5.8265	4.0659	3.6044	no	no	no
2	GRMZM2G162486			6.2256	8.9636	0.877	2.5715	1.1954	6.7403	3.7598	5.357	no	no	no
2	GRMZM2G137820			1.3661	1.464	0.2028	0.8041	0.8555	1.5079	1.358	1.2121	no	no	no
2	GRMZM2G118243			19.9719	20.1335	12.2894	10.6218	8.5886	19.4596	14.5406	10.3271	no	no	no
2	GRMZM2G109586			0.1096	0.3138	0	0.1126	0.0484	0.228	0.1201	0.1103	no	no	no
2	GRMZM2G070113			19.2251	28.2859	10.3998	10.2494	14.4766	27.6631	22.9837	18.2813	no	no	no
2	GRMZM5G824439			31.8364	33.8085	9.9702	4.9294	20.219	26.6576	20.2464	17.7269	yes	yes	no
2	GRMZM2G361605			4.5771	6.8049	3.0422	2.8983	2.3144	6.7025	4.7049	4.4051	no	no	no
2	GRMZM2G162426			23.5234	25.5823	4.9873	8.3442	6.5585	23.278	16.5838	14.616	no	no	no
2	GRMZM2G390400			7.4457	9.9658	3.4483	3.3852	4.3988	8.7223	7.3484	5.531	no	no	no
2	GRMZM2G552644			5.7639	5.9272	2.6246	4.6976	4.2784	5.3665	4.0062	4.8257	no	no	no
2	GRMZM2G052670			8.3399	11.1525	3.2156	3.5889	6.6682	12.2189	6.3449	8.0459	no	no	no
2	GRMZM2G079658			6.5651	7.0294	2.6478	3.2011	2.8588	6.6422	5.9711	4.3241	no	no	no
2	GRMZM2G010211			2.5074	4.0272	1.1302	2.0327	0.8088	2.9474	2.6431	2.4168	no	no	no
2	GRMZM2G351747			0.8523	2.2036	0.7982	0.599	1.0986	1.7683	1.3049	0.8812	no	no	no
2	GRMZM2G126913			2.4194	3.5754	0.8995	1.2446	1.497	3.2137	2.4215	2.3315	no	no	no
2	GRMZM2G072612			10.8256	16.5614	7.4764	9.4724	5.6219	15.2414	13.4751	11.595	no	no	no
2	GRMZM2G162082			1.8549	1.8886	0.4996	1.197	0.5984	2.2069	1.707	1.4641	no	no	no
2	GRMZM2G043291			3.854	4.5684	0.4677	1.3723	1.4639	2.8073	3.0705	2.4593	no	no	no
2	GRMZM2G334216			18.6485	27.7519	10.5084	10.0607	14.6331	27.2664	22.7629	17.9163	no	no	no
2	GRMZM2G069687			9.3906	11.1778	3.34	2.9039	3.6259	11.9391	8.1353	5.7497	yes	no	no
2	GRMZM2G050089			10.8399	10.7625	4.0873	5.1363	5.6267	12.5938	10.1983	7.5217	no	no	no
2	GRMZM2G147854			36.2963	39.8732	20.863	21.6413	17.3639	39.0167	27.0404	23.8973	no	no	no
2	GRMZM2G100511			78.4543	71.1702	26.2304	33.8352	25.6362	53.1858	64.1618	39.2948	no	no	no
2	GRMZM2G077842			2.6955	9.9346	0.571	0.9288	1.1562	7.0951	2.5296	4.3619	yes	no	no
2	GRMZM2G033375			2.903	3.3728	1.2884	1.697	2.2313	3.6374	1.8015	2.0859	no	no	no
2	GRMZM2G054056			7.1497	7.7215	3.3778	3.674	5.7989	9.2066	6.3262	5.1446	no	no	no
2	GRMZM2G019236			35.7581	36.8077	18.5596	16.7475	21.2066	35.5931	29.6224	27.0634	no	no	no
2	GRMZM2G449909			10.8954	18.9728	4.8125	4.536	7	17.8357	13.0201	10.2166	yes	no	no
2	GRMZM2G003022			13.5473	16.4913	6.1892	5.9422	5.8655	18.87	14.2746	10.5821	no	no	no
2	GRMZM2G473511			0.9649	1.0988	0.1356	0.5601	0.4261	1.5347	0.8984	0.3482	no	no	no
2	GRMZM2G028521			11.9351	19.0285	5.3779	6.9883	7.6267	13.5437	7.372	9.5417	no	no	no
2	GRMZM2G102167			14.3474	15.1223	4.1744	7.5322	4.969	11.8614	11.9318	7.8089	no	no	no
2	GRMZM2G318956			7.1813	13.4299	3.337	3.349	6.7961	12.2073	11.1306	6.52	yes	no	no
2	GRMZM2G171163			2.1258	2.5475	0.461	0.6712	0.7245	2.1848	1.8478	1.4152	no	no	no
2	GRMZM2G001812			0.4689	0.4951	0.2938	0.3065	0.1354	0.4162	0.3396	0.3783	no	no	no
2	GRMZM2G054397			27.5917	25.9927	7.9359	8.8534	12.8134	30.9322	17.3288	10.2063	yes	no	no
2	GRMZM2G117298			13.0077	15.8974	6.3135	6.9899	7.0518	19.9412	13.1259	9.5174	no	no	no
2	GRMZM2G369371			0	0.0805	0	0.0132	0	0.0617	0	0.0244	no	no	no
2	GRMZM2G349554			8.4091	12.9882	3.24	1.1819	3.9869	10.8948	9.9898	6.2124	yes	no	no
2	GRMZM5G899855			0.2908	1.2627	0.4567	0.1909	0.7479	0.9777	0.1512	0.6277	no	no	no
2	AC226368.2_FG006			9.5919	10.1764	6.4276	8.2298	3.91	9.1666	8.5018	7.6848	no	no	no
2	GRMZM2G150772			25.4479	34.9216	16.1844	18.6874	19.7145	35.1177	18.8902	25.9781	no	no	no
2	GRMZM2G166082			59.8317	82.8349	25.8271	44.5287	28.7181	79.198	48.9773	60.7118	no	no	no
2	GRMZM2G133621			3.1561	4.3026	1.8005	2.6675	1.9683	3.9133	3.6431	2.8197	no	no	no
2	GRMZM2G339379			4.7785	5.3906	1.1911	2.1105	2.7375	4.9448	3.7161	3.5209	no	no	no
2	GRMZM5G813206			3.6114	6.6438	1.4255	2.1303	2.4361	6.3113	3.2648	3.312	no	no	no
2	GRMZM2G439819			0.8228	1.2589	0.193	0.2848	0.3254	1.1252	0.978	0.5338	no	no	no
2	GRMZM2G124532	phyB1	phytochromeB1	9.3776	10.6804	4.8318	4.33	4.6605	12.7813	10.0674	8.042	no	no	no
2	GRMZM2G177447			5.779	6.1168	1.5032	1.7219	2.0485	7.2509	5.792	4.0007	yes	no	no
2	GRMZM2G311328			1.0512	1.7993	0.3285	0.2853	0.4622	1.5524	1.1628	1.1268	no	no	no
2	GRMZM2G134753			6.8147	6.9773	2.7956	2.9988	3.4287	7.3534	4.7779	4.1481	no	no	no
2	GRMZM2G131667			21.1567	25.1574	9.6426	11.6033	10.5306	26.3206	23.4846	17.6681	no	no	no
2	GRMZM2G458035			0.9926	1.6445	0.1245	0.2021	0.225	0.8166	0.748	0.6395	no	no	no
2	GRMZM2G113351			9.9503	11.7794	2.7833	4.0132	3.2039	10.1378	10.4126	4.5956	no	no	no
2	GRMZM2G321420			2.7563	6.7264	1.2891	0.6371	1.6106	4.5751	3.2456	2.6033	yes	no	no
2	GRMZM2G103755			0.7505	1.008	0.4123	0.2442	0.1194	0.6408	0	0.1206	no	no	no
2	GRMZM2G139760			24.4438	24.5723	14.6439	14.6353	11.5922	24.5194	17.7437	16.1601	no	no	no
2	GRMZM2G143128			43.6758	44.0145	17.4019	32.4799	19.4719	47.5489	41.882	33.4463	no	no	no
2	GRMZM2G073931			1.7961	3.6135	1.0971	2.4423	0.9802	3.1394	1.5029	1.8567	no	no	no
2	GRMZM2G117108			7.8311	7.257	1.6598	2.2955	3.2569	7.4142	4.5792	4.0986	yes	no	no
2	GRMZM2G077711			5.148	4.7927	1.9873	2.4673	1.3757	5.042	6.2996	4.4575	no	no	no
2	GRMZM2G116243			7.4661	6.9432	3.8667	4.5527	3.354	8.6013	5.6684	3.717	no	no	no
2	GRMZM2G418916			12.9563	18.0514	5.2061	7.1276	15.5035	17.887	10.6583	10.1866	no	no	no
2	GRMZM2G033135			5.6115	9.2196	3.0694	2.3457	4.0247	8.494	5.3852	4.143	yes	no	no
2	GRMZM2G014400			2.7331	2.8162	1.4106	1.3963	1.333	3.0625	2.153	2.3833	no	no	no
2	GRMZM2G056088			3.2533	4.9106	1.1983	1.13	1.9948	4.0392	2.8903	2.0039	yes	no	no
2	GRMZM2G078389			0.4969	0.6375	0.3226	0.2255	0.1852	0.4378	0.6263	0.5975	no	no	no
2	GRMZM2G091481	pdi1	protein disulfide isomerase1	134.274	160.828	63.7983	115.318	62.7433	181.107	95.9199	131.778	no	no	no
2	GRMZM2G166159			52.3535	65.2407	11.8145	17.6295	17.131	45.1769	18.5295	35.8551	no	no	no
2	GRMZM2G027851			7.1025	9.396	2.6543	5.6209	5.4921	9.8385	3.4209	7.3251	no	no	no
2	AC233882.1_FG003			0.698	0.7508	0.1695	0.1725	0.0995	0.8703	0.2383	0.3006	no	no	no
2	GRMZM2G410275			0.1414	0.1318	0	0.0983	0.032	0.1404	0.1104	0	no	no	no
2	GRMZM2G083016			7.3264	10.8926	2.4264	5.654	2.0908	8.8919	8.0404	5.2869	no	no	no
2	GRMZM2G010657			18.0721	19.3235	5.0512	4.9018	8.3672	15.0319	12.2805	11.5919	no	no	no
2	GRMZM2G081886			30.4365	32.3715	13.7576	9.437	19.3541	39.4143	28.3786	17.3477	yes	no	no
2	GRMZM2G088261			13.1816	16.6194	5.2339	5.7767	7.6853	18.6168	11.6414	11.1811	no	no	no
2	GRMZM2G092797			8.8999	11.4117	2.8011	3.3122	3.7558	8.8668	7.125	6.3246	no	no	no
2	GRMZM2G134415			0.7478	1.8564	0.1614	0.4571	0.5855	1.6532	0.7744	0.6461	no	no	no
2	GRMZM2G452954			1.1955	1.543	0.2623	0.5251	0.3064	1.5168	0.5396	0.323	no	no	no
2	GRMZM2G098712			5.7806	7.0218	4.6671	3.3377	3.3603	7.2619	6.5468	4.7162	no	no	no
2	GRMZM2G117346			23.3264	27.5949	10.3286	10.9585	10.7158	25.9745	16.7695	15.0583	no	no	no
2	GRMZM2G088375			20.9061	24.9372	12.7121	13.5874	9.2038	24.0485	15.0549	11.6968	no	no	no
2	GRMZM2G162525			74.3437	79.5155	28.9884	33.2975	23.8496	52.143	61.6683	31.4518	no	no	no
2	GRMZM2G406043			10.6845	9.9407	5.7989	3.6359	4.6887	9.5265	10.2483	8.6292	no	no	no
2	GRMZM2G313678			26.5639	28.4873	13.5723	14.5928	15.3311	30.6612	25.1627	20.4403	no	no	no
2	GRMZM2G056661			17.921	20.6926	4.0767	3.5869	8.8169	22.9095	11.2568	9.6579	yes	no	no
2	GRMZM5G820727			4.2752	4.3265	2.0694	2.3168	2.3696	5.1528	3.8825	2.9505	no	no	no
2	GRMZM2G147629			4.1309	3.9034	1.683	1.9676	1.781	3.9351	4.4008	2.4023	no	no	no
2	GRMZM2G065970			5.1631	4.8535	1.7449	3.2727	1.6063	4.722	4.9316	3.1472	no	no	no
2	GRMZM2G469061			1.0107	2.0788	0.4084	0.9656	0.7096	1.3823	0.6238	1.4421	no	no	no
2	GRMZM2G013236			0.7261	0.6427	0.1422	0.1946	0.1502	0.639	0.5443	0.1606	no	no	no
2	GRMZM2G117153			7.0343	7.9459	3.0289	3.752	2.0927	6.7225	7.2968	4.7362	no	no	no
2	GRMZM2G080176			5.333	7.2331	1.4927	1.2554	2.3325	8.4014	5.4435	4.4599	yes	no	no
2	GRMZM2G057942			36.4272	32.8703	9.0666	13.157	14.2205	33.9513	27.5662	21.37	no	no	no
2	GRMZM2G057576			28.3473	30.0261	7.5346	8.8316	16.3521	33.5311	15.2382	22.795	no	no	no
2	GRMZM2G069708			8.8364	7.9482	3.1408	5.7585	3.5032	9.1793	9.5468	7.3304	no	no	no
2	GRMZM2G393453			2.6229	2.9926	0.6806	1.0578	1.3999	2.3308	1.2566	1.089	no	no	no
2	GRMZM2G313027			33.0382	32.1484	9.4408	10.6773	13.3093	30.0372	22.7596	18.8776	no	no	no
2	GRMZM2G400175			0.0701	0.7176	0.0523	0.1659	0.0401	0.5822	0.2174	0.1197	no	no	no
2	GRMZM2G117189			3.0385	3.5955	2.3754	1.9286	1.3949	4.1939	2.5587	2.6521	no	no	no
2	GRMZM2G084938			3.6945	5.5446	1.948	2.6287	1.3178	5.5859	3.7258	2.4342	no	no	no
2	GRMZM2G159724			12.9801	14.1348	5.0301	7.096	6.9408	14.0054	6.5529	6.1212	no	no	no
2	GRMZM2G083374			3.1837	4.7366	1.3768	1.2155	1.7199	3.7416	2.4455	2.2402	no	no	no
2	GRMZM2G134903			1.8478	2.0429	0.2674	1.0283	0.4185	1.389	0.5104	0.7305	no	no	no
2	GRMZM2G044832			17.7867	19.0118	6.4875	12.0237	7.0423	14.0238	19.049	16.0197	no	no	no
2	GRMZM2G072608			2.7122	3.3485	1.037	0.9129	1.2425	4.0855	3.0231	2.4194	no	no	no
2	GRMZM2G033619			19.9753	20.0649	6.4746	6.6377	6.0416	12.4988	12.589	8.4663	no	no	no
2	GRMZM5G872368			0.2363	0.415	0.0274	0.2931	0.0807	0.34	0.2089	0.2761	no	no	no
2	GRMZM2G095302			10.6743	16.0463	5.243	6.755	7.5956	15.3217	8.2836	10.5413	no	no	no
2	GRMZM2G320606			11.754	11.6917	1.2949	5.1293	2.9585	15.0081	8.3826	7.2145	no	no	no
2	GRMZM2G117060			8.5671	8.7392	2.0063	2.8614	3.9718	8.1413	5.441	5.2751	no	no	no
2	GRMZM2G322493			14.1816	19.5172	3.7192	3.1812	9.7896	19.5693	14.5191	14.6885	yes	yes	no
2	GRMZM2G439950			26.8074	27.6321	8.4066	6.3902	12.6821	32.6303	17.8521	17.5342	yes	yes	no
2	GRMZM2G004908			7.2495	8.4562	3.1369	3.0333	3.6855	8.7206	6.008	8.8433	no	no	no
2	GRMZM2G070639			14.3861	23.3671	5.3563	10.7501	5.0866	15.1708	9.3219	7.4717	no	no	no
2	GRMZM2G090980			9.326	12.6749	3.1256	4.5262	4.2717	14.0102	8.1791	7.6417	yes	no	no
2	GRMZM2G401869			6.4168	8.4256	1.4989	1.9035	2.4744	10.3675	6.503	4.3168	yes	no	no
2	GRMZM2G017054			0.4283	0.9125	0.5572	0.2894	0.2759	0.7024	0.5494	0.5763	no	no	no
2	GRMZM2G139688			1.2742	1.5359	0.2884	0.7808	0.3736	0.9469	0.4448	0.8004	no	no	no
2	GRMZM2G457909			0.2816	0.9339	0.1388	0.1691	0.484	0.733	0.5084	0.3355	no	no	no
2	GRMZM2G366698			12.9721	14.4926	5.1998	3.8047	4.4373	9.4113	7.0138	5.438	no	no	no
2	GRMZM2G153754			6.5674	12.6124	2.0999	4.0602	2.4661	12.174	6.7159	7.64	no	no	no
2	GRMZM2G129453			41.7568	46.4212	25.1408	29.9776	25.8693	46.1265	44.159	34.2362	no	no	no
2	GRMZM2G114107			16.5812	15.3795	8.9461	8.338	6.1141	14.2398	16.7352	8.7212	no	no	no
2	GRMZM2G153434			1.8558	5.8451	0.9344	2.2204	1.2976	3.7346	1.9012	2.0953	no	no	no
2	GRMZM2G448687	apt1	aberrant pollen transmission1	0.6111	1.5367	0.1657	0.2968	0.4659	1.048	0.8611	0.4576	no	no	no
2	AC217553.3_FG008			4.7882	4.818	0.8495	2.5644	1.7577	5.6932	3.5844	2.8672	no	no	no
2	GRMZM2G468693			7.6165	7.0525	2.6989	2.9273	3.523	7.9012	5.5425	3.5345	yes	no	no
2	GRMZM2G040145			11.6731	12.6081	6.4628	8.461	4.7352	12.8275	9.5955	6.8897	no	no	no
2	GRMZM2G138587			0.5397	0.8377	0.2381	0.1179	0.2449	0.5605	0.7925	0.2549	no	no	no
2	GRMZM2G052699			6.681	5.8564	3.2836	3.3882	3.0936	7.6913	7.4822	3.6889	no	no	no
2	GRMZM2G052078			9.445	17.4373	4.8008	4.8824	4.9872	16.6016	13.8578	8.7043	no	no	no
2	GRMZM2G084347			7.4333	7.418	2.6923	4.1825	2.5273	6.0254	8.228	6.0967	no	no	no
2	GRMZM2G171031			12.1945	16.2069	7.7161	6.5739	4.7734	13.0509	15.8378	5.8339	no	no	no
2	GRMZM5G832362			2.5319	9.6711	0.5356	3.2379	1.1004	6.5071	2.7037	3.3517	no	no	no
2	GRMZM2G108530			0.6915	2.6249	0.4191	0.5186	0.5427	1.772	1.0551	0.9427	no	no	no
2	GRMZM2G092586			2.5964	5.1802	1.3662	1.1579	1.8424	4.6519	3.989	2.9217	yes	no	no
2	GRMZM2G149567			2.3244	3.1644	1.3877	1.5669	1.2308	3.0963	2.6594	1.8792	no	no	no
2	GRMZM2G130375			22.7821	39.0243	15.8676	16.5416	13.4083	39.2699	27.6475	22.0447	no	no	no
2	GRMZM2G161493			6.2899	7.6828	2.1454	3.3579	2.9037	9.2928	5.9954	4.6007	no	no	no
2	GRMZM2G373175			12.0994	15.6355	6.3605	7.6939	7.4134	17.8872	12.935	11.1823	no	no	no
2	GRMZM2G315127			7.6994	10.4458	3.086	4.6128	3.1311	12.6658	7.5226	4.5592	yes	no	no
2	GRMZM2G471139			4.0046	8.1348	1.0984	1.2975	1.9551	4.3094	2.1083	5.7	no	yes	no
2	GRMZM2G119933			10.3523	9.6165	4.0244	5.0408	3.9475	10.9859	7.976	5.5258	no	no	no
2	GRMZM2G157772			1.696	2.2142	0.2844	0.5013	0.3893	2.2926	0.8784	1.0829	no	no	no
2	AC234166.1_FG001			8.3491	9.3211	4.2579	5.156	5.138	8.7822	5.1333	8.2326	no	no	no
2	GRMZM2G374574			12.0774	16.7193	3.356	3.5463	5.3165	15.1419	10.9949	8.4224	yes	yes	no
2	GRMZM2G152757			8.5855	8.5822	4.4971	4.4741	4.2052	9.3025	6.2182	5.988	no	no	no
2	GRMZM2G368195			0.5904	0.6765	0.0903	0.3293	0.0502	0.4962	0.1536	0.7009	no	no	no
2	GRMZM5G858310			5.9595	6.7173	1.6438	2.4467	2.5991	6.7274	4.9872	3.3631	no	no	no
2	GRMZM2G172322	gsr1	glutathione reductase1	12.1041	14.5043	5.3789	6.0233	5.6272	15.5163	12.0482	8.6818	no	no	no
2	GRMZM2G174114			3.9615	4.9274	1.3714	1.5294	1.926	4.2444	4.2399	1.7394	no	no	no
2	GRMZM2G119850			66.7897	114.56	34.3152	62.8189	35.0704	75.6767	85.3853	69.7346	no	no	no
2	GRMZM2G051151			1.7943	3.3272	2.2258	1.8338	1.4235	3.0116	1.2053	2.7626	no	no	no
2	GRMZM2G416667			5.3153	6.6996	2.7255	1.8109	2.5359	5.6548	5.5168	2.3527	yes	no	no
2	GRMZM2G476810			21.18	27.3484	9.1305	7.4042	10.0163	20.7163	19.1286	17.2872	no	no	no
2	GRMZM2G365957			4.9008	9.1077	2.0982	3.6392	2.9128	4.9632	7.0818	4.3493	no	no	no
2	GRMZM2G087590			3.5694	6.3437	1.4393	4.1569	2.2864	4.752	4.2205	1.331	no	no	no
2	GRMZM5G881950			51.4292	54.1495	16.7369	17.1239	19.6132	41.5963	37.0506	29.9149	no	no	no
2	GRMZM2G428242			6.9792	13.2961	4.6586	3.4762	6.818	11.5357	8.8741	6.7201	yes	no	no
2	GRMZM2G060986			0.6234	1.3426	0.3068	0.2992	0.4699	0.8872	0.6331	1.0851	no	no	no
2	GRMZM2G088313			3.9743	4.3688	1.8427	2.2021	1.3814	4.0228	3.4198	2.303	no	no	no
2	GRMZM2G057618			7.4796	10.4303	3.2826	4.4302	4.8985	11.1155	7.8939	7.1187	no	no	no
2	GRMZM2G046900			7.6272	8.6537	3.6918	5.1692	3.986	8.1511	8.7276	5.622	no	no	no
2	GRMZM2G015610			36.8917	33.9219	17.7916	25.1642	14.6554	33.1057	38.4896	21.3079	no	no	no
2	GRMZM2G022711			9.4485	11.7581	4.4344	5.13	4.2441	13.8275	9.6082	8.1902	yes	no	no
2	GRMZM2G049031			7.2246	7.8762	3.8997	5.4098	2.1749	6.9001	2.8325	6.2832	no	no	no
2	GRMZM5G851753			5.8613	6.3246	3.1381	2.4664	5.9777	5.976	5.5469	5.6675	no	no	no
2	GRMZM2G118693			0.9952	2.1464	0.7024	0.7662	0.8774	1.3705	1.7057	1.0212	no	no	no
2	AC206266.3_FG001			0.4518	0.8675	0.2211	0.2254	0.4218	0.6196	0.7159	0.3154	no	no	no
2	GRMZM2G473310			7.623	15.2166	1.8516	1.3873	5.7473	9.2343	4.7592	5.1813	yes	yes	no
2	GRMZM5G859493			2.9141	10.8112	3.1025	2.3239	3.3241	7.1488	7.4176	2.7635	no	no	no
2	GRMZM2G055905			25.7173	31.6132	7.8217	14.6458	10.0846	38.0396	26.2734	22.5831	yes	no	no
2	GRMZM2G124460			6.2459	8.7616	4.8095	4.1368	2.6953	6.161	7.338	2.8394	no	no	yes
2	GRMZM2G144739			15.4969	14.8355	7.2112	11.6628	8.9411	15.274	14.7923	12.549	no	no	no
2	GRMZM2G309275			0.0404	0.0429	0	0	0	0.0188	0.017	0.0094	no	no	no
2	GRMZM2G400238			11.7406	11.1856	4.449	3.979	5.3677	13.6952	9.6442	6.9627	yes	no	no
2	GRMZM2G022897			20.0646	20.0659	9.0326	11.4273	7.6258	15.4895	14.3789	11.5106	no	no	no
2	GRMZM2G151564			16.5629	14.9572	7.039	10.1836	7.0791	14.9278	16.2698	12.8021	no	no	no
2	GRMZM2G128938			3.5928	5.8125	2.0922	1.4572	2.7024	6.3241	3.3054	3.4602	yes	no	no
2	GRMZM2G043394			1.925	3.6216	0.7385	1.893	1.0246	3.4101	1.6582	2.8808	no	no	no
2	GRMZM2G071599			15.4948	25.63	13.2398	13.8255	8.4754	17.7737	18.223	12.0374	no	no	no
2	GRMZM2G158043			1.8728	2.4121	0.6715	0.979	0.7392	1.8546	2.048	0.94	no	no	no
2	GRMZM2G143330			96.5277	84.7389	40.6497	57.6138	49.7142	82.2965	102.335	74.245	no	no	no
2	GRMZM2G178537			2.7726	3.8495	1.1247	0.8978	1.3073	3.3701	2.6222	2.0597	no	no	no
2	GRMZM2G009091			23.4283	21.605	12.162	10.2981	7.5666	26.7154	16.9044	11.3719	yes	no	no
2	GRMZM5G881803			10.8456	14.7245	3.0304	6.2723	4.2536	16.6948	8.5914	11.2369	no	no	no
2	GRMZM2G027135			1.3977	4.3827	1.1375	1.2541	1.1189	2.7871	2.1864	1.8672	no	no	no
2	GRMZM2G115855			10.3964	11.3614	4.6492	5.0885	4.7901	12.2897	9.4167	6.0053	no	no	no
2	GRMZM2G083515			0.3079	0.4862	0.0912	0.3618	0.1305	0.5523	0.2567	0.3855	no	no	no
2	GRMZM2G054210			10.746	13.1402	3.5587	4.7806	5.2986	14.9974	12.4473	9.1236	no	no	no
2	AC233871.1_FG004			1.1306	1.8733	0.5036	0.4321	0.7245	1.453	1.2399	1.1289	no	no	no
2	GRMZM2G074906			57.7768	87.5973	33.244	22.2571	26.7261	71.5357	37.2994	33.05	yes	no	no
2	GRMZM2G114162			21.2404	26.252	4.8238	5.7413	7.367	27.3103	20.9701	16.4894	no	no	no
2	GRMZM2G020151			0.6681	1.8339	0.5129	0.3965	0.4772	1.2506	0.6112	0.4903	no	no	no
2	GRMZM2G035594			4.7883	6.0628	2.836	3.2083	2.5275	6.9437	3.4139	3.8279	no	no	no
2	GRMZM2G318860			4.4152	6.1463	2.394	2.3265	2.2586	6.2347	4.2356	3.6047	no	no	no
2	GRMZM2G013283			6.3525	7.6981	3.0637	1.9817	3.7477	8.2152	7.0586	5.7859	yes	no	no
2	GRMZM2G112172			1.3791	1.7846	0.3108	0.1882	0.3022	1.0476	0.871	0.5367	no	no	no
2	GRMZM2G363408			5.404	6.7056	2.116	3.312	2.9278	6.573	6.7318	4.6589	no	no	no
2	GRMZM2G090722			31.2036	35.3456	11.8503	16.0039	13.4031	38.8248	39.5745	21.7825	no	no	no
2	GRMZM2G033478			34.2181	46.3859	14.2889	9.585	24.5159	56.9407	28.9733	28.3066	yes	yes	no
2	GRMZM2G147430			5.2121	5.4234	1.2995	1.8333	2.8873	5.8107	3.2675	3.1082	yes	no	no
2	GRMZM2G442057			5.4119	7.6225	1.8775	1.8225	2.8966	5.6033	4.2245	5.5998	no	no	no
2	GRMZM2G409839			3.6586	6.1807	1.774	0.6166	3.2762	5.2471	4.544	4.1947	yes	yes	no
2	GRMZM2G149480			25.4578	27.2921	8.0813	11.6788	8.7099	25.7263	19.2522	15.3044	no	no	no
3	GRMZM2G119782			204.18	196.999	177.299	145.655	97.5958	48.8347	267.257	69.5882	yes	no	no
3	GRMZM2G462417			1.7329	1.5444	1.2605	1.0946	0.9557	0.8222	2.1731	0.5555	no	no	no
3	AC234164.1_FG004			48.3888	64.7382	54.5627	38.3721	16.7786	4.4961	61.1066	11.7667	yes	no	no
3	GRMZM2G136072			0.3961	0.741	0.601	0.4582	0.0952	0.0163	0.8025	0.1436	yes	no	no
3	GRMZM2G084014			7.3022	13.9783	9.2837	12.1443	3.6785	1.8626	10.5914	5.2509	yes	no	no
3	GRMZM2G147443			1.0981	2.8714	3.2455	2.9406	1.1737	0.2456	4.4537	0.9632	yes	no	no
3	GRMZM2G049906			9.0926	13.3519	14.6349	9.4738	5.201	1.3006	14.8373	3.282	yes	yes	yes
3	GRMZM2G081099			2.7059	2.0976	3.082	2.7695	0.7057	0.1688	4.0237	1.1732	yes	no	no
3	GRMZM2G448883			31.9697	69.6369	62.9751	75.9707	29.717	6.4653	72.6104	19.0193	yes	yes	no
3	GRMZM2G037627			7.7799	5.1689	5.7726	4.3483	2.8331	2.1219	9.3594	3.2142	no	no	no
3	GRMZM2G028438			11.6798	18.2971	22.832	15.7101	8.2407	2.1754	26.6378	5.2806	yes	yes	no
3	GRMZM2G141019			1.4653	2.1553	1.5048	1.5621	0.9212	0.3355	2.0937	0.6779	yes	no	no
3	GRMZM2G097747			107.89	72.6541	107.474	96.5841	48.4299	9.7997	122.865	33.1399	yes	no	no
3	GRMZM2G429982			37.3706	49.0888	68.1722	42.9575	19.7692	9.2209	61.2869	14.9218	yes	no	no
3	GRMZM2G179703			39.2845	33.8604	36.7575	36.4634	17.5749	8.319	44.7427	14.478	yes	no	no
3	GRMZM2G044388			17.5304	15.9626	15.7503	10.7504	9.0823	7.0507	24.8104	8.3026	no	no	no
3	GRMZM2G058531			19.8638	28.8566	21.9906	21.3971	11.7907	4.9614	18.1232	8.3667	yes	yes	no
3	GRMZM2G054115			9.9796	13.3962	12.3345	14.306	7.1051	3.6491	9.8666	7.9518	yes	no	no
3	GRMZM2G139878			8.3616	11.2456	9.5107	11.2292	1.5883	2.0506	5.506	1.7107	yes	yes	yes
3	GRMZM2G401830			1.0701	1.3993	1.1261	0.9877	0.1971	0.5248	1.107	0.7952	no	no	no
3	GRMZM2G093139			43.9131	34.8907	47.7458	37.8884	23.2653	13.1853	46.1372	20.9144	no	no	no
3	GRMZM2G466044			0.608	0.4796	0.6486	0.8325	0.3304	0.082	0.8441	0.1098	no	yes	no
3	GRMZM2G177391			0.0643	0.7341	0.4238	0.837	0.2328	0.0406	0.9918	0.2057	no	no	no
3	GRMZM2G021610			4.9082	7.3428	6.5042	6.5725	3.0179	2.5424	5.1642	3.5885	yes	no	no
3	AC210003.2_FG004			189.888	168.643	263.649	228.705	155.69	55.9827	258.739	97.0138	yes	yes	no
3	GRMZM2G057262			1.3668	3.1248	4.6614	2.8327	1.6338	0.3641	4.603	1.0379	yes	yes	no
3	GRMZM2G106622			0.5875	1.025	0.5412	0.9248	0.5695	0.5059	0.859	0.1553	no	yes	no
3	GRMZM2G072376			2.0064	2.636	2.2622	1.974	0.8294	0.3939	1.6349	1.2286	yes	no	no
3	GRMZM2G121221			137.58	343.027	316.447	321.418	153.235	208.315	344.056	221.51	no	no	no
3	GRMZM2G039359			6.2902	10.3936	8.0041	6.169	5.4717	3.8588	12.1896	4.3409	no	no	no
3	GRMZM2G029974			11.794	12.0563	15.0711	13.8452	7.7065	2.9334	20.9575	6.4198	yes	no	no
3	GRMZM2G004079			7.7081	11.2541	7.7087	10.0509	5.2317	5.804	12.9387	5.8232	no	no	no
3	AC234575.1_FG003			5.5308	8.0876	7.1033	9.89	5.4925	1.8847	11.7157	4.7743	yes	no	no
3	GRMZM2G032955			0.4824	1.1288	1.2099	1.4949	0.1762	0.0448	0.8862	0.245	yes	yes	no
3	GRMZM2G305264			6.166	13.1606	13.5963	14.3049	6.9526	3.5326	10.2184	4.8167	yes	yes	no
3	GRMZM2G147814			6.9422	7.7073	6.5214	7.6718	3.9726	3.6658	8.3388	4.2234	no	no	no
3	GRMZM2G030567			1.876	1.6704	2.6028	1.1047	0.3914	0.0999	1.1645	0.3724	yes	no	no
3	GRMZM2G172695			2.4331	3.2201	4.0063	2.9076	1.5729	1.2532	3.8388	1.7327	no	no	no
3	GRMZM2G408174			49.4003	75.7631	100.048	66.5373	40.8948	29.8496	109.61	39.6922	no	no	no
3	GRMZM2G029609			0.3629	0.569	0.3411	0.6326	0.2396	0.0836	0.7933	0.1474	no	no	no
3	GRMZM2G378452			6.9411	6.64	8.7236	7.0201	3.5916	3.3154	5.3764	2.7566	yes	yes	yes
3	GRMZM2G037350			2.3188	4.3016	2.4967	2.5516	0.9177	1.0113	3.1777	1.0407	no	no	no
3	GRMZM2G034471			9.169	15.0853	7.0791	5.703	2.3525	1.2746	12.5736	4.9318	yes	no	no
3	GRMZM2G075974			13.9688	13.8533	12.1652	19.7976	7.7983	2.6787	16.5759	4.4824	yes	yes	no
3	GRMZM2G150859			14.0248	20.6959	15.0288	17.2164	4.4924	2.2029	19.3221	5.3397	yes	yes	no
3	GRMZM2G474531			0.1279	0.4321	0.4199	0.4055	0.237	0.221	0.4951	0.0718	no	no	no
3	GRMZM2G340065			24.4747	31.2337	32.9073	31.2059	19.0542	14.1883	46.6316	16.0277	no	no	no
3	AC231180.2_FG006			20.7634	29.9973	28.9746	29.1217	12.6186	10.6677	31.3971	15.6707	no	no	no
3	GRMZM2G062541			9.8124	12.2751	11.9589	9.1112	4.65	1.1427	12.261	2.6388	yes	yes	no
3	GRMZM2G059634			8.5583	8.8886	9.7245	13.3737	4.52	1.2546	12.6122	4.3961	yes	yes	no
3	GRMZM2G148930			1.5651	1.9635	1.5879	2.0358	0.8188	0.4172	1.5074	0.5956	yes	no	no
3	GRMZM2G012861			12.1507	21.6223	17.5377	14.4944	6.8117	2.814	18.1121	6.5093	yes	no	no
3	GRMZM2G477139			23.9646	27.3982	38.3041	31.7262	18.9613	7.7506	42.5486	11.7737	yes	yes	no
3	GRMZM2G081949			11.6176	11.1119	11.2816	14.0307	6.5841	1.6517	10.4741	3.6209	yes	yes	no
3	GRMZM5G842214			0.2028	0.2493	0.3332	0.2996	0.0272	0.1456	0.1949	0.0738	no	no	no
3	GRMZM2G072029			1.0583	8.4645	7.9219	7.7522	2.0797	0.4532	6.2753	1.633	yes	yes	yes
3	GRMZM2G166719			1.8739	6.6164	6.0923	2.9351	1.3491	0.9698	5.5067	1.1098	yes	no	no
3	GRMZM2G096010			9.0163	14.5586	13.9176	8.5895	6.9766	3.1847	18.3527	3.9341	yes	yes	no
3	GRMZM2G156301			0.7204	1.9574	2.5652	2.0266	0.9492	0.1459	1.8573	0.4324	yes	yes	no
3	GRMZM5G822137			6.994	10.6368	8.0889	9.3117	4.0695	1.844	6.8747	2.9798	yes	yes	no
3	GRMZM2G124179			22.0848	35.0922	29.3666	34.49	14.7654	7.2019	47.1363	15.6822	yes	no	no
3	GRMZM2G000261			0.3768	0.6124	0.4152	0.4123	0.0831	0.0187	0.3591	0.0428	no	no	no
3	GRMZM2G039011			9.7141	11.9225	8.9704	9.731	4.758	3.2128	15.1398	5.8161	yes	no	no
3	GRMZM2G025171			0.4767	0.659	0.5881	0.3157	0.217	0.2232	0.5508	0.116	no	no	no
3	GRMZM5G846405			0.1361	0.7148	0.4503	0.2702	0.6004	0.1779	0.7131	0.3722	no	no	no
3	GRMZM2G178571			10.9657	9.8233	8.1091	4.565	3.3264	2.2897	12.5649	3.8558	no	no	no
3	GRMZM5G834697			10.8106	10.385	10.7934	8.4394	5.3685	1.2174	14.5137	3.7974	yes	no	yes
3	GRMZM2G080295			11.8866	9.8319	11.5461	5.4333	3.7653	0.7683	9.7888	1.3136	yes	yes	no
3	GRMZM2G018275			16.745	14.59	26.409	23.2942	10.3808	3.6103	25.4691	7.8349	yes	yes	yes
3	GRMZM2G170044			1.0392	2.5749	2.1214	2.4413	0.2637	0.1643	1.9837	0.5043	yes	yes	no
3	GRMZM2G146192			26.9674	32.5524	52.7731	22.954	13.1442	2.0743	42.8563	6.5817	yes	yes	no
3	GRMZM2G083810	hsp18f	heat shock protein18f	9.2438	194.09	163.178	193.878	40.6634	13.0468	228.026	29.2368	yes	no	no
3	GRMZM2G145914			3.8884	5.8251	3.2576	4.7671	2.1859	1.2852	4.6338	2.3192	yes	no	no
3	GRMZM2G128219			0.2286	0.7724	0.9176	0.6858	0.2892	0.0625	0.8956	0.1826	no	no	no
3	GRMZM2G319798			79.3751	151.808	179.802	103.186	52.2994	12.3523	176.554	32.9256	yes	no	no
3	AC215181.3_FG004			0.3987	0.9849	1.2176	1.009	0.2439	0.0351	1.236	0.0949	yes	yes	no
3	GRMZM2G129247			2.4504	4.3605	3.5402	2.677	1.4024	0.9188	5.0941	1.4371	yes	no	no
3	GRMZM5G882427			5.3084	6.2429	5.5135	4.3296	1.7867	0.6346	6.2168	1.7455	yes	no	no
3	GRMZM2G142645			5.1939	5.0411	5.4913	4.1126	2.4395	0.6457	7.6264	1.5195	yes	no	no
3	GRMZM2G393301			0.5932	2.5368	1.7623	1.5699	0.3917	0.188	2.1457	0.234	yes	yes	no
3	GRMZM2G467123			0.7084	1.1649	1.5996	0.7359	0.391	0.3411	0.7389	0.2075	no	no	no
3	GRMZM5G890976			3.2931	3.2907	3.8926	1.4448	1.2285	0.4894	3.7222	0.7068	no	no	no
3	GRMZM2G404973			34.9363	45.8057	39.0136	41.1284	17.7237	13.3255	41.6691	20.1488	yes	no	no
3	GRMZM2G164584			12.0214	11.2779	14.251	8.3869	4.7205	4.2527	9.2098	4.0397	no	no	no
3	GRMZM2G043854			2.1044	2.4673	2.5865	2.1881	0.7968	0.3533	2.3225	0.8596	yes	no	no
3	GRMZM2G167649			62.7548	150.127	87.7991	85.7687	40.743	20.4156	165.689	46.1425	no	no	no
3	GRMZM2G089598			1.2051	4.0495	3.7484	2.9741	1.0355	0.4393	3.2033	0.8206	yes	yes	no
3	GRMZM2G135795			4.531	8.5851	8.7288	4.6252	3.5295	0.9428	11.7609	2.1819	yes	no	no
3	GRMZM2G365298			3.0015	5.2538	4.2981	5.3217	1.8407	1.0883	5.0907	1.721	yes	yes	no
3	GRMZM2G163776			0.5677	0.9155	0.9288	0.7524	0.3116	0.171	0.9633	0.2538	yes	no	no
3	GRMZM2G046911			36.2155	62.0721	38.7	32.5485	20.054	19.5494	48.5834	20.3139	no	no	no
3	AC196090.3_FG006			26.159	60.5516	57.2818	82.1681	35.4399	10.663	89.9675	28.3109	yes	no	no
3	GRMZM2G472266			7.1188	7.4457	10.0444	9.156	3.7532	4.7144	7.0751	3.4155	no	no	no
3	GRMZM2G365162			32.2155	37.7138	37.9733	32.0216	12.2632	5.0928	47.8508	10.6399	yes	yes	no
3	GRMZM2G482046			12.7044	10.7064	10.924	7.3184	5.5518	1.1455	13.3668	2.3233	yes	yes	no
3	GRMZM2G153648			26.0304	44.19	42.5827	45.7213	27.6523	23.2929	49.3355	28.1771	yes	yes	no
3	GRMZM2G129288			29.2853	38.1524	32.5628	36.6529	17.3566	19.3957	25.3544	14.1628	no	yes	no
3	GRMZM2G519210			3.3057	8.1803	4.3287	3.9345	2.5712	0.3656	9.9805	1.5395	yes	no	no
3	GRMZM2G327051			0.4364	1.0252	0.5216	0.7435	0.3083	0.1295	1.1647	0.2376	yes	no	no
3	AC194112.3_FG001			2.7832	4.4491	3.8401	4.3661	2.6715	1.3766	3.5868	2.4107	yes	no	no
3	GRMZM2G138600			4.8043	4.8955	8.189	6.8092	2.4609	0.5975	8.3233	2.9551	yes	no	no
3	GRMZM2G021642			2.867	7.2394	3.7951	2.8429	1.6795	1.0602	5.3612	1.5373	yes	no	no
3	AC206788.3_FG015			0.7174	0.6884	0.7838	0.2274	0.2711	0.1194	0.6963	0.1965	no	no	no
3	GRMZM2G447984			434.911	692.23	386.008	462.783	241.38	217.121	780.882	299.672	no	no	no
3	GRMZM2G007466			1.4919	2.3181	1.367	1.0443	0.4507	0.598	1.7877	0.4678	no	no	no
3	GRMZM2G118825			12.8031	14.5881	13.3292	9.2474	5.0144	1.9197	13.9176	4.6677	yes	no	no
3	GRMZM2G134235			8.3919	9.7356	8.0195	4.3748	2.4844	0.9746	9.4565	1.5476	yes	no	no
3	GRMZM2G073700			1.0146	1.6821	1.9633	1.2384	0.8033	0.4948	2.0546	0.6804	no	no	no
3	GRMZM5G822563			30.3983	42.0864	41.2979	23.8499	16.8021	14.867	43.7739	16.2602	no	no	no
3	GRMZM2G128986			0.5918	3.7937	3.5099	2.7145	0.8192	0.7933	2.1869	1.3556	no	no	no
3	GRMZM2G426156			2.5766	4.7545	3.4261	3.5141	1.5428	1.7757	4.7416	2.1564	no	no	no
3	GRMZM2G324643			61.3016	71.9271	51.7303	74.3776	34.0815	17.6298	71.9484	34.4402	yes	yes	no
3	GRMZM2G147942			40.6245	52.1668	57.5811	50.3977	26.223	9.4083	62.9904	18.6829	yes	no	no
3	GRMZM2G026911			0.5892	0.9307	1.0307	0.8457	0.4373	0.1137	1.1913	0.2614	yes	no	no
3	GRMZM2G132794			19.2373	12.3286	19.1888	16.0633	8.9573	2.1779	24.0075	6.9082	yes	no	no
3	GRMZM2G172450			0.4838	0.9647	0.8499	0.6211	0.3124	0.4094	1.0534	0.4181	no	no	no
3	GRMZM2G113349			15.1595	34.3496	26.0128	27.3713	17.613	10.8652	44.2928	14.2308	no	no	no
3	GRMZM2G043119			6.7592	13.2638	9.758	11.0699	4.8017	3.4273	21.3066	4.6775	yes	no	no
3	GRMZM2G069162			97.5003	114.758	124.117	147.432	65.4717	41.0308	113.936	66.8047	no	no	no
3	GRMZM2G082034			0.3073	0.3102	0.4227	0.334	0.1143	0.0962	0.2937	0.37	no	no	no
3	GRMZM2G082508			12.1046	12.3576	18.9482	10.5341	6.7432	4.6055	16.2103	7.2977	no	no	no
3	GRMZM2G126106			14.4721	11.4706	13.2594	11.0702	1.6702	3.4197	14.1784	6.9374	yes	no	no
3	GRMZM2G051545			2.1872	3.8562	3.305	3.7692	1.2774	0.9895	2.035	1.3305	yes	yes	no
3	GRMZM2G701221			118.94	88.5955	92.9543	76.0026	42.5574	41.9946	127.347	59.013	no	no	no
3	GRMZM5G825759			0.6821	2.3084	2.0513	2.3989	0.7745	1.179	2.6433	1.1303	no	no	no
3	GRMZM2G135054			13.0263	14.4658	21.5812	15.9412	8.3186	5.4464	17.1221	8.8718	yes	no	no
3	GRMZM2G170152			12.7127	25.0573	17.9381	26.3625	8.8043	7.9596	23.1356	11.6044	yes	yes	no
3	GRMZM2G429540			2.4458	3.1174	4.6411	3.6069	1.3135	0.354	3.91	1.1585	yes	yes	yes
3	GRMZM2G131525			28.8328	38.8404	45.618	52.1579	22.4123	18.2545	49.9233	27.4274	no	no	no
3	GRMZM2G091578			228.818	317.076	181.71	172.508	122.858	25.4647	245.083	72.4092	yes	yes	yes
3	GRMZM2G011553			3.7657	6.3966	8.91	4.6612	1.7193	0.3726	9.5617	1.3132	yes	yes	no
3	GRMZM5G818978			4.5653	6.2954	6.054	3.5475	2.3964	2.311	5.7835	2.4	no	no	no
3	GRMZM2G364272			0.374	1.5598	2.0074	1.2245	0.6112	0.136	1.6625	0.3165	yes	no	no
3	GRMZM2G144146			43.3245	40.1058	44.8678	39.4686	23.7144	9.2593	69.3926	21.4059	yes	no	no
3	GRMZM5G839794			1.2675	3.6072	1.8805	2.2153	0.8494	0.3714	4.2294	0.5665	yes	yes	no
3	GRMZM2G144180			18.5733	18.7849	13.4225	19.0897	9.9899	8.23	20.5503	15.1769	no	no	no
3	GRMZM2G049057			11.0327	14.1003	10.5038	9.6361	4.4782	3.2814	12.4245	4.6308	yes	no	no
3	GRMZM2G032763			4.7611	7.2614	6.5659	3.4344	1.869	0.5604	8.8435	1.3622	yes	no	no
3	GRMZM2G111300			2.1411	5.2544	5.9013	4.07	2.1728	0.452	4.3719	1.333	yes	yes	no
3	GRMZM2G083932			0.4011	1.5868	1.9811	1.5814	0.6128	0.1041	1.9655	0.2244	yes	yes	no
3	GRMZM2G120652			136.835	129.957	173.13	154.609	75.9007	24.34	199.862	60.7736	yes	yes	no
3	GRMZM2G414423			1.0365	1.9988	2.3387	2.27	1.2528	0.6474	2.633	0.8834	yes	yes	no
3	GRMZM2G414373			31.3702	26.8601	42.3474	32.1099	18.9355	4.5419	25.8678	8.7053	yes	yes	no
3	GRMZM2G096610			16.8561	18.0017	12.9791	17.8208	6.84	7.5776	24.4113	7.7505	no	no	no
3	GRMZM2G474326			0.6303	0.985	0.8458	1.3186	0.1456	0.0348	1.2027	0.1426	yes	yes	no
3	GRMZM2G161673			3.1019	2.479	3.5083	2.3967	1.0514	0.4544	3.2771	0.7786	yes	yes	no
3	GRMZM2G452178	gn1	gnarley1	28.4501	49.3781	40.0143	40.9844	21.5016	18.3692	56.6338	23.2027	no	no	no
3	GRMZM2G097349			0.625	0.7003	0.626	0.3571	0.1303	0.0767	0.9801	0.2262	no	no	no
3	GRMZM5G832281			4.3382	5.1082	6.0083	3.9701	2.6642	0.6551	9.0557	1.3174	yes	yes	no
3	GRMZM2G031637			28.8732	40.9104	42.2679	40.6671	19.8616	9.8273	52.1713	20.3695	no	no	no
3	GRMZM2G004466			2.8246	3.717	2.1491	1.7946	0.589	0.1872	3.6017	0.3391	yes	yes	no
3	GRMZM2G090029			8.7369	20.0927	16.9585	8.5867	4.5347	3.4267	25.053	3.9223	no	no	no
3	GRMZM2G394973			2.3822	5.8905	4.8289	3.0829	0.9641	0.1188	3.6448	0.571	yes	yes	no
3	GRMZM2G316758			1.7196	5.6252	3.1886	2.2385	1.1224	0.1269	3.6673	0.8294	yes	no	yes
3	GRMZM2G068330			72.262	80.4847	77.06	76.7973	21.7795	8.1076	61.0689	21.3493	yes	yes	no
3	GRMZM2G119246			5.5917	10.1043	7.4071	9.5676	2.8695	2.5623	7.8201	4.731	yes	no	no
3	GRMZM2G054896			8.5031	8.3626	6.9985	8.3353	2.8809	0.7748	14.3571	2.2178	yes	yes	no
3	GRMZM2G440208			56.0863	64.1628	60.9733	50.2183	33.8385	23.741	98.1643	36.6176	no	no	no
3	GRMZM2G160730	gl15	glossy15	0.7625	1.059	1.0198	0.3124	0.2296	0.0742	0.5645	0.1605	no	no	no
3	GRMZM2G150503			7.3584	6.968	8.3022	9.0466	4.0586	4.1246	7.9281	4.5603	no	no	no
3	GRMZM2G023921			15.4714	36.3571	57.0011	32.7967	15.6504	4.5795	43.1284	6.9869	yes	yes	no
3	GRMZM2G124530			14.4941	24.0677	28.7812	22.9485	12.4159	14.5307	21.1719	13.3558	no	no	no
3	GRMZM2G127404			15.1836	21.5345	20.0042	16.8847	9.5688	7.6822	31.1906	9.2046	no	no	no
3	GRMZM2G163200			2.3199	2.5905	2.4747	2.2641	1.382	0.6781	2.7121	0.9341	yes	yes	no
3	GRMZM2G081719			5.2955	6.894	5.1125	7.3453	2.6288	2.6231	6.7462	4.7468	no	no	no
3	AC233850.1_FG001			2.8356	4.2161	3.8104	1.8888	0.8826	0.2177	3.6776	0.4588	no	no	no
3	GRMZM2G350357			0	0.0443	0.0503	0	0.0227	0.0023	0.0228	0	yes	no	yes
3	GRMZM2G101457			54.4453	48.2209	49.4726	47.9435	25.0341	16.7458	72.9767	24.0458	no	no	no
3	GRMZM5G898740			17.9616	16.0333	16.4108	10.2345	7.7655	6.9096	20.7304	8.1189	no	no	no
3	GRMZM5G872373			7.5437	10.2305	7.5798	8.1523	5.7207	2.817	9.7891	3.2301	yes	yes	no
3	GRMZM5G828487			0.989	4.0133	2.6941	1.0948	0.8873	0.1638	4.5655	0.4002	yes	no	no
3	GRMZM2G479529			15.5684	35.1757	21.0579	20.8212	7.9703	1.5003	37.1956	7.4711	yes	yes	no
3	GRMZM2G026188			0.3787	1.1081	1.2759	0.5697	0.7715	0.0813	0.9585	0.1009	no	no	no
3	GRMZM2G041636			1.0669	3.1781	2.8954	2.1729	0.7736	0.3612	4.8411	0.5407	yes	yes	no
3	GRMZM2G156126			3.5122	4.9715	8.8113	3.7492	2.9392	0.4336	7.4268	1.1381	yes	yes	no
3	GRMZM2G098988			18.2414	19.424	18.5503	22.8396	10.3422	11.9083	18.5282	13.5771	yes	no	no
3	GRMZM2G140674			3.7266	5.0373	4.0768	5.5258	2.2866	0.335	6.3515	0.6171	yes	yes	no
3	GRMZM2G386590			0.3215	0.988	0.5555	0.5396	0.6258	0.0595	0.9977	0.1768	no	no	no
3	GRMZM2G076868			1.596	1.4807	2.1662	2.495	1.0537	0.1643	2.4668	0.5626	yes	yes	yes
3	GRMZM2G158194			9.8872	15.6982	15.3031	17.6678	7.1218	4.5411	16.4366	9.7137	yes	no	no
3	GRMZM2G145825			9.1614	6.784	8.6448	6.2442	4.295	2.0225	12.1377	4.7963	yes	no	no
3	GRMZM2G170008			13.6577	17.0368	15.0758	10.8122	8.8619	8.5463	14.7279	6.6907	no	no	no
3	GRMZM2G146940			10.8041	9.5415	7.1054	6.7865	3.9447	0.9572	16.564	2.4538	yes	no	no
3	GRMZM2G156904			7.0558	11.9754	12.4856	9.0108	5.8782	1.7701	19.7038	3.5595	yes	no	no
3	GRMZM2G076034			3.0212	5.7704	6.5433	5.4809	2.1806	0.7619	8.4409	1.6001	yes	yes	no
3	GRMZM2G041328			57.1949	72.4146	82.8426	82.7959	45.6456	24.6355	71.4632	33.2953	yes	no	no
3	GRMZM2G169681			8.3174	11.6964	8.6394	14.6856	5.1997	3.2027	14.2975	8.0885	yes	no	no
3	GRMZM2G172945			16.2661	30.0465	19.182	22.6985	10.7156	9.65	38.1172	13.9559	no	no	no
3	GRMZM2G003306			735.259	1387.67	1038.07	1129.98	548.555	318.432	1642.55	548.41	yes	yes	yes
3	GRMZM2G155329	chi1	chalcone flavanone isomerase1	10.3518	32.0393	21.3077	15.5151	8.9427	3.4598	19.3375	4.5723	yes	yes	no
3	GRMZM2G398423			2.6379	4.3716	4.6765	3.841	2.3798	1.0839	5.6513	2.2048	yes	no	no
3	GRMZM2G090493			1.1933	2.7879	2.886	1.8898	0.7713	0.3157	3.5474	0.6495	yes	no	no
3	AC197047.3_FG001			1.3906	1.5573	2.6742	1.6106	0.6408	0.1634	2.2414	0.5863	yes	no	no
3	GRMZM2G019746			0.3633	0.526	0.4973	0.2249	0.1665	0.0732	0.5852	0.1492	no	no	no
3	GRMZM2G109865			12.634	11.2112	17.3493	9.1138	7.3347	4.7565	15.9511	6.1806	no	no	no
3	GRMZM2G018771			10.2597	11.9569	12.1169	13.5849	5.3567	4.6346	12.3306	5.2371	yes	yes	no
3	GRMZM2G028252			2.9589	9.7516	9.7026	4.8472	2.455	1.1091	7.0668	1.4686	yes	yes	no
3	GRMZM2G082249			3.3088	5.6071	5.7666	5.9326	3.2149	1.8487	6.9776	3.0042	yes	no	no
3	GRMZM2G169973			48.3014	40.5334	53.6253	22.8657	17.2334	4.2353	68.3866	9.8377	yes	no	no
3	GRMZM5G874896			8.7797	13.6759	12.386	14.9504	9.9526	10.1065	14.622	8.7981	no	no	no
3	GRMZM5G850455			148.133	356.553	530.937	268.224	161.931	70.2026	437.093	97.4097	no	no	no
3	GRMZM2G067865			8.4857	6.9066	6.7243	2.7622	1.6113	0.1742	8.3855	0.8782	yes	yes	no
3	GRMZM2G057554			2.3294	3.4647	3.2183	2.0071	1.25	0.5752	4.5178	0.8096	yes	no	no
3	GRMZM2G017643			15.5163	37.5043	42.701	32.4683	11.5035	6.9409	47.3337	11.7878	yes	yes	no
3	AC233910.1_FG008			12.6463	18.6376	25.8174	17.6478	8.1806	1.6874	23.1302	3.7986	yes	yes	no
3	AC196259.2_FG010			1.0477	1.2326	1.1607	1.1833	0.7284	0.3583	1.1779	0.6536	no	no	no
3	GRMZM2G342963			1.6368	2.3074	2.3053	2.3879	0.8262	0.6086	2.2284	0.9911	yes	no	no
3	GRMZM2G151909			4.6557	11.534	8.2364	9.0672	4.2419	2.1992	16.318	4.1326	yes	no	no
3	GRMZM2G154799			3.1952	10.7758	9.9953	4.1919	4.0578	1.7594	14.1014	2.4815	no	no	no
3	GRMZM2G064960			18.6136	17.0643	17.6543	21.1101	9.8754	7.6112	21.5988	12.5138	yes	no	no
3	GRMZM2G085646			0.9818	1.3632	0.8267	1.2827	1.0422	0.5309	1.068	0.3442	no	yes	no
3	GRMZM2G132868			3.1628	4.5961	5.6588	4.1233	2.107	1.6151	6.3823	2.0401	no	no	no
3	GRMZM2G125552			2.0935	4.1681	4.6305	4.7029	2.6256	1.4146	4.4516	2.2295	yes	no	no
3	GRMZM2G314667			60.1221	47.8961	53.2424	68.2111	29.0367	41.4259	78.3086	32.7495	no	no	no
3	GRMZM2G139522			0.3569	0.9992	0.6359	0.5953	0.5265	0.0668	0.5901	0.1326	yes	yes	no
3	GRMZM2G049346			13.0506	17.5066	10.2064	12.648	5.1047	3.4169	20.7207	6.6201	yes	no	no
3	GRMZM2G068963			2.3178	2.1275	2.4669	3.4472	0.9052	0.4261	2.3052	0.563	yes	yes	no
3	GRMZM2G042136			4.987	5.7804	7.3169	6.4742	3.354	2.2342	7.9832	3.3248	yes	no	no
3	GRMZM2G018070			20.069	29.9881	35.3705	19.9999	11.0309	3.4071	32.8019	4.0801	yes	yes	no
3	GRMZM2G063342			5.1783	8.2053	10.5109	9.1411	3.5129	1.2497	8.6306	2.9284	yes	yes	no
3	GRMZM5G840610			5.5196	7.1363	3.9042	2.9983	2.2516	0.3936	6.8149	1.4417	yes	no	no
3	GRMZM2G163157			3.8298	4.6657	3.8139	3.2821	2.2711	0.8438	8.2423	1.6331	yes	no	no
3	GRMZM2G004617			47.4855	60.3121	70.144	50.3045	13.27	4.0942	62.3125	23.061	yes	no	no
3	GRMZM2G351484			9.0919	15.189	27.6097	6.4178	4.3217	0.4063	26.8158	2.0183	yes	yes	no
[truncated: 20,749 more rows]
