# Supplementary material for: Regulatory modules controlling maize inflorescence architecture
Source: HighWire-hosted journal article supplement (doi:10.1101/gr.166397.113), 2013-12-04
Supplement: Supp_Table10.xlsx [file Supp_Table10.xlsx]

## Sheet: SM_identity_module
Supplemental Table 10. Candidate genes associated with a Spikelet Meristem (SM) identity module.
aCandidate genes were co-expressed with branched silkless1 (bd1), showed co-regulation across three dynamic transitions, and showed differential expression (p < 0.05; FDR 10%) in at least one of these transitions. bFold changes (ln) are shown for the three dynamic transitions: 1mm to 2mm in wild-type ears; normal Inflorescence Meristem (IM)/Spikelet Pair Meristem (SPM) to Spikelet Meristem (SM); …
	ln_fc during transitionsb			annotationsc
maize.gene.ida	wt.1mm->2mm	IM/SPM->SM	ra1.1mm->2mm	classical.maize.gene		Refseq	Entrez	GO	InterPro
GRMZM2G307119	4.6751	2.29115	-7.95617	bd1	branched silkless1	branched silkless1 (bd1), mRNA	branched silkless1	DNA binding;transcription factor activity;regulation of transcription, DNA-dependent	TF_ERF_DNA-bd; DNA-bd_integrase-typ
GRMZM2G099376	3.98329	5.17888	-0.47083			hypothetical protein LOC100272742 (LOC100272742), mRNA	hypothetical protein LOC100272742	NA	F-box_dom_cyclin-like; F-box_dom_Skp2-like
GRMZM2G147659	3.84558	3.99975	-0.91102			hypothetical protein LOC100278009 (LOC100278009), mRNA	hypothetical protein LOC100278009	NA	NA
GRMZM2G012119	3.66987	1.84295	-0.934845			LOC100272863 (pco104742), mRNA	LOC100272863	homoiothermy;ice binding;response to freezing;homoiothermy;ice binding;response to freezing	Antifreeze_1
GRMZM2G091643	3.23863	1.49218	-1.64058			hypothetical protein LOC100383549 (LOC100383549), mRNA	hypothetical protein LOC100383549	catalytic activity;metabolic process;catalytic activity;metabolic process	AMP-dep_Synth/Lig; AMP-binding_CS
GRMZM2G063975	3.05748	3.23611	-1.97121			plasma membrane associated protein (LOC100286240), mRNA	plasma membrane associated protein	NA	AWPM-19
GRMZM2G402417	3.0183	3.20847	-0.197523			NA	NA	NA	Disease-R_pln; Mannose-bd_lectin
GRMZM2G401883	2.93488	4.17144	-0.960237			hypothetical protein LOC100276969 (LOC100276969), mRNA	hypothetical protein LOC100276969	NA	NA
GRMZM2G064202	2.92676	4.2783	-1.53664			LOC100285163 (umc1419), mRNA	LOC100285163	hydrolase activity, hydrolyzing O-glycosyl compounds;carbohydrate metabolic process	Glyco_hydro_17; X8; Glyco_hydro_catalytic_core
GRMZM2G074793	2.92243	1.88708	-3.41565			hypothetical protein LOC100383297 (LOC100383297), mRNA	hypothetical protein LOC100383297	intracellular;zinc ion binding	Znf_C2H2; Znf_C2H2-like
GRMZM2G066326	2.86641	3.21512	-0.632381			LOC100283433 (IDP105), mRNA	LOC100283433	cysteine-type endopeptidase activity;proteolysis;cysteine-type peptidase activity	Prot_inhib_I29; Peptidase_C1A_C; Pept_cys_AS
GRMZM2G084958	2.81243	2.53161	-2.36121			protochlorophyllide reductase1 (pcr1), mRNA;protochlorophyllide reductase A (LOC100381344), mRNA	protochlorophyllide reductase1;protochlorophyllide reductase A	metabolic process;2,3-dihydro-2,3-dihydroxybenzoate dehydrogenase activity;enterobactin biosynthetic process;oxidoreductase activity;protochlorophyllide reductase activity;oxidation reduction;metabolic process;2,3-dihydro-2,3-dihydroxybenzoate dehydrogenase activity;enterobactin biosynthetic process;oxidoreductase activity;protochlorophyllide reductase activity;oxidation reduction;metabolic proce…	DH_sc/Rdtase_SDR; PKS_KR; Glc/ribitol_DH; DHB_DH; Prochl_reduct
GRMZM2G076417	2.8032	3.78988	-2.01363			NA	NA	serine-type endopeptidase activity;proteolysis;identical protein binding;negative regulation of catalytic activity	Prot_inh_S8A; Peptidase_S8/S53; Protease-assoc_domain; Peptidase_S8/S53_AS
GRMZM2G102218	2.78388	2.86419	-0.986747			NA	NA	NA	NA
GRMZM2G005353	2.74888	3.25737	-2.09641	yab14	yabby14	yabby14 protein (ZYB14), mRNA	yabby14 protein	NA	NA
GRMZM2G165192	2.70819	1.61465	-2.62629			AER (LOC100285433), mRNA	AER	transferase activity, transferring acyl groups other than amino-acyl groups	Transferase
GRMZM2G079034	2.69484	1.40101	-1.81311			hypothetical protein LOC100277961 (LOC100277961), mRNA	hypothetical protein LOC100277961	zinc ion binding;oxidoreductase activity;oxidation reduction	ADH_Zn_CS
GRMZM2G165638	2.64312	2.35496	-0.874433			hypothetical protein LOC100383284 (LOC100383284), mRNA	hypothetical protein LOC100383284	protein binding;zinc ion binding	NA
GRMZM2G177076	2.6421	2.80241	-1.66703			hypothetical protein LOC100274209 (LOC100274209), mRNA	hypothetical protein LOC100274209	G-protein coupled receptor activity;G-protein coupled receptor protein signaling pathway;integral to membrane;G-protein coupled receptor activity;G-protein coupled receptor protein signaling pathway;integral to membrane	X8; GPR6_rcpt
GRMZM2G394688	2.49994	1.4558	-2.8919			hypothetical protein LOC100383978 (LOC100383978), mRNA	NA	monooxygenase activity;iron ion binding;electron carrier activity;heme binding;oxidation reduction	Cyt_P450; Cyt_P450_CS; Cyt_P450_E_grp-I; Cyt_P450_E_grp-IV
GRMZM2G406155	2.46076	1.41832	-2.66092			NA	NA	NA	NA
GRMZM2G088309	2.43154	0.533388	-1.44807			protein DROOPING LEAF (LOC100282346), mRNA	protein DROOPING LEAF	NA	YABBY; HMG_superfamily
GRMZM2G033555	2.4011	1.75115	-0.293891			dihydroflavonol-4-reductase (LOC100284846), mRNA	dihydroflavonol-4-reductase	catalytic activity;3-beta-hydroxy-delta5-steroid dehydrogenase activity;steroid biosynthetic process;metabolic process;oxidoreductase activity;cellular metabolic process;coenzyme binding;catalytic activity;3-beta-hydroxy-delta5-steroid dehydrogenase activity;steroid biosynthetic process;metabolic process;biosynthetic process;oxidoreductase activity;cellular metabolic process;coenzyme binding;cata…	DH_sc/Rdtase_SDR; Epimerase_deHydtase; Polysac_CapD-like; 3Beta_OHSteriod_DH/Estase; Male_sterile_NAD-bd
GRMZM2G107129	2.35303	2.80528	-6.09947			NA	NA	intracellular;zinc ion binding	Znf_C2H2; Znf_C2H2-like
GRMZM2G023715	2.26041	1.2461	-0.890354			hypothetical protein LOC100382229 (LOC100382229), mRNA;hypothetical protein LOC100382229 (LOC100382229), mRNA	hypothetical protein LOC100382229;hypothetical protein LOC100382229	protein kinase activity;protein serine/threonine kinase activity;protein binding;ATP binding;protein amino acid phosphorylation;protein kinase activity;protein serine/threonine kinase activity;protein binding;ATP binding;protein amino acid phosphorylation	LRR-contain_N2; Leu-rich_rpt; Se/Thr_prot_kinase-like_dom; Ser-Thr/Tyr-Pkinase; Kinase-like_dom; Tyr_Pkinase_cat_dom; Ser/Thr_prot_kinase_dom; Protein_kinase_ATP_BS; Ser/Thr_prot_kinase_AS
GRMZM2G064818	2.21685	2.15317	-1.51592			hypothetical protein LOC100276601 (LOC100276601), mRNA;hypothetical protein LOC100277980 (LOC100277980), mRNA	hypothetical protein LOC100276601;hypothetical protein LOC100277980	NA	NA
GRMZM2G081822	2.19509	2.68943	-0.766063			hypothetical protein LOC100383047 (LOC100383047), mRNA	hypothetical protein LOC100383047	structural constituent of cell wall	Hsp20; HSP20-like_chaperone; Pistil_extensin
GRMZM2G178509	2.1796	2.34663	-1.2644			NA	NA	NA	GRAM
GRMZM2G017555	2.17378	2.73868	-1.52428			hypothetical protein LOC100191701 (LOC100191701), mRNA	hypothetical protein LOC100191701	6-phosphofructokinase activity;enzyme inhibitor activity;cell wall;6-phosphofructokinase complex;glycolysis;pectinesterase activity;cell wall modification;regulation of GTPase activity	Pectinesterase_inhib; Pectinesterase_cat; Pectin_lyase_fold/virulence; Rab_GDI_REP; Phosphofructokinase; Pectinesterase_AS
GRMZM2G022934	2.14552	0.461226	-1.23064			NA	NA	catalytic activity;catalytic activity	Thioredoxin-like_fold; AB_hydrolase_1; Epox_hydrolase-like
GRMZM2G059544	2.14183	2.79013	-0.760612			IAA25 - auxin-responsive Aux/IAA family member (LOC100285214), mRNA	IAA25 - auxin-responsive Aux/IAA family member	nucleus;regulation of transcription;nucleus;regulation of transcription	AUX_IAA
GRMZM2G128421	2.13338	1.84518	-1.13083			IAA12 - auxin-responsive Aux/IAA family member (LOC100283322), mRNA;hypothetical protein LOC100274141 (LOC100274141), mRNA	IAA12 - auxin-responsive Aux/IAA family member	nucleus;regulation of transcription;nucleus;regulation of transcription;nucleus;regulation of transcription	AUX_IAA
GRMZM5G838773	2.1297	1.87971	-0.719343			NA	NA	ion channel activity;voltage-gated potassium channel activity;ion transport;potassium ion transport;membrane;transmembrane transport	Ion_trans; Ion_trans_2; cNMP-bd; cNMP-bd-like; Kinase-like_dom; K_chnl_volt-dep_EAG/ELK/ERG
GRMZM2G028543	2.12215	1.74456	-3.71588			hypothetical protein LOC100273652 (LOC100273652), mRNA	hypothetical protein LOC100273652	protein binding;zinc ion binding	Znf_C3HC4_RING-type; Znf_RING-CH; Znf_RING
GRMZM2G057159	2.12138	0.879076	-1.1129			hypothetical protein LOC100193256 (LOC100193256), mRNA	hypothetical protein LOC100193256;hypothetical protein LOC100193256	serine-type endopeptidase activity;proteolysis;serine-type endopeptidase activity;proteolysis;identical protein binding;negative regulation of catalytic activity;serine-type endopeptidase activity;proteolysis;identical protein binding;negative regulation of catalytic activity;serine-type endopeptidase activity;proteolysis;identical protein binding;negative regulation of catalytic activity	Prot_inh_S8A; Peptidase_S8/S53; Protease-assoc_domain; Prot_inh_propept; Peptidase_S8/S53_AS
GRMZM2G002142	2.07924	1.83112	-3.45764			NA	NA	monooxygenase activity;iron ion binding;electron carrier activity;heme binding;oxidation reduction	Cyt_P450; Cyt_P450_E_grp-I; Cyt_P450_E_grp-IV; Cyt_P450_CS
GRMZM2G016649	2.04258	1.47034	-1.65895			hypothetical protein LOC100279868 (LOC100279868), mRNA	hypothetical protein LOC100279868	DNA binding;DNA binding;DNA binding	SANT_DNA-bd; MADF-dom
GRMZM2G155077	2.03849	1.54594	-0.772606			hsp20/alpha crystallin family protein (LOC100284991), mRNA	hsp20/alpha crystallin family protein	NA	Hsp20; HSP20-like_chaperone
GRMZM2G091232	2.02703	1.95713	-1.19226			hypothetical protein LOC100277754 (LOC100277754), mRNA	hypothetical protein LOC100277754	NA	DUF1218
GRMZM2G057616	1.98667	0.82085	-1.47783			NA	NA	ion channel activity;voltage-gated chloride channel activity;chloride transport;membrane;transmembrane transport;ion channel activity;transmembrane transport	Cl-channel_core
GRMZM2G012242	1.9805	2.3503	-1.88139			NA	NA	transporter activity;oligopeptide transport;membrane;transporter activity;oligopeptide transport;membrane	Oligopeptide_transporter; MFS_general_subst_transpt
GRMZM2G171139	1.96832	1.10302	-1.35304			hypothetical protein LOC100278714 (LOC100278714), mRNA;hypothetical protein LOC100382251 (LOC100382251), mRNA	hypothetical protein LOC100278714;hypothetical protein LOC100382251	monooxygenase activity;iron ion binding;electron carrier activity;heme binding;oxidation reduction	Cyt_P450; Cyt_P450_E_grp-I; Cyt_P450_E_grp-IV
GRMZM2G353195	1.96144	2.04555	-1.83941			hypothetical protein LOC100191659 (LOC100191659), mRNA	hypothetical protein LOC100191659	NA	Pentatricopeptide_repeat
GRMZM2G106276	1.95729	0.725709	-2.28286			homeobox-leucine zipper protein ATHB-4 (LOC100284389), mRNA	homeobox-leucine zipper protein ATHB-4	DNA binding;transcription factor activity;nucleus;regulation of transcription, DNA-dependent;transcription regulator activity;homoiothermy;sequence-specific DNA binding;ice binding;response to freezing	Homeobox; Leu_zip_homeo; Homeodomain-like; HTH_lambrepressr; Antifreeze_1; Homeobox_region; Homeobox_CS
GRMZM2G162748	1.95181	1.35829	-0.28488	ris2	iron-sulfur protein2	hypothetical protein LOC100273354 (LOC100273354), mRNA	hypothetical protein LOC100273354	ubiquinol-cytochrome-c reductase activity;plastoquinol-plastocyanin reductase activity;membrane;oxidoreductase activity;thylakoid membrane;2 iron, 2 sulfur cluster binding;oxidation reduction	Cyt_b6-f_cplx_Fe-S_su; Rieske_2Fe-2S; Rieske_Fe-S_prot_C
GRMZM2G162453	1.92792	2.13848	-1.76599			hypothetical protein LOC100279461 (LOC100279461), mRNA	NA	serine-type endopeptidase activity;proteolysis;identical protein binding;negative regulation of catalytic activity;serine-type endopeptidase activity;proteolysis;identical protein binding;negative regulation of catalytic activity;serine-type endopeptidase activity;proteolysis;homoiothermy;identical protein binding;negative regulation of catalytic activity;ice binding;response to freezing	Prot_inh_S8A; Peptidase_S8/S53; Protease-assoc_domain; Peptidase_S8/S53_AS; Antifreeze_1
GRMZM2G178741	1.9057	2.84097	-1.2788			NA	NA	transcription factor activity;nucleus;regulation of transcription, DNA-dependent;transcription regulator activity;sequence-specific DNA binding;DNA binding;transcription factor activity;nucleus;regulation of transcription, DNA-dependent;transcription regulator activity;sequence-specific DNA binding	NA
GRMZM2G048549	1.86357	1.62323	-2.47162			hypothetical protein LOC100191836 (LOC100191836), mRNA	hypothetical protein LOC100191836	calcium ion binding;calcium ion binding	EF-hand; EF_hand_Ca-bd; EF_Hand_1_Ca_BS; Recoverin
GRMZM2G092311	1.8468	2.71867	-2.92107			chlorophyll a-b binding protein 6A (LOC100281791), mRNA	chlorophyll a-b binding protein 6A	NA	Chloroa_b-bind
GRMZM2G112894	1.84587	1.80009	-2.07665			hypothetical protein LOC100277676 (LOC100277676), mRNA	hypothetical protein LOC100277676	NA	NA
GRMZM2G030862	1.84314	2.28372	-0.187579			NA	NA	NA	PyrdxlP-dep_Trfase_major_dom
GRMZM2G119499	1.80916	1.75351	-0.929235			glutathione transferase11 (gst11), mRNA	glutathione transferase11	NA	Glutathione_S-Trfase_N; Thioredoxin-like_fold
GRMZM2G126732	1.80118	1.9387	-3.22178			ACC oxidase20 (acco20), mRNA	ACC oxidase20	oxidoreductase activity;iron ion binding;oxidoreductase activity;oxidation reduction	NA
GRMZM2G020740	1.79037	1.29778	-4.10265			acyltransferase (LOC100281878), mRNA	acyltransferase	catalytic activity;fatty acid biosynthetic process;metabolic process;lipid biosynthetic process;membrane;transferase activity, transferring acyl groups other than amino-acyl groups	FAE1_typ3_polyketide_synth; ACP_syn_III_C; Thiolase-like; 3-ktacl-CoA_syn
GRMZM2G033359	1.78356	4.02009	-2.23518			hypothetical protein LOC100383126 (LOC100383126), mRNA	hypothetical protein LOC100383126	NA	GH3
GRMZM2G131611	1.75373	1.82499	-1.00854			protein binding protein (LOC100281740), mRNA;hypothetical protein LOC100382304 (LOC100382304), mRNA	protein binding protein;hypothetical protein LOC100382304	zinc ion binding;zinc ion binding	Znf_C3HC4_RING-type; Znf_RING-CH
GRMZM2G013255	1.75032	5.39383	-1.28897			alpha-L-fucosidase 1 (LOC100285202), mRNA	alpha-L-fucosidase 1	alpha-L-fucosidase activity;carbohydrate metabolic process;fucose metabolic process;alpha-L-fucosidase activity;carbohydrate metabolic process	Glyco_hydro_catalytic_core; Glyco_hydro_29
GRMZM2G149739	1.71192	1.73352	-3.45571			NA	NA	homoiothermy;ice binding;response to freezing	Antifreeze_1
GRMZM2G431504	1.69683	1.42043	-0.397157			hypothetical protein LOC100191338 (LOC100191338), mRNA	hypothetical protein LOC100191338;hypothetical protein LOC100191338	catalytic activity;3-beta-hydroxy-delta5-steroid dehydrogenase activity;steroid biosynthetic process;metabolic process;oxidoreductase activity;cellular metabolic process;coenzyme binding;catalytic activity;3-beta-hydroxy-delta5-steroid dehydrogenase activity;steroid biosynthetic process;metabolic process;oxidoreductase activity;cellular metabolic process;coenzyme binding	DH_sc/Rdtase_SDR; Epimerase_deHydtase; 3Beta_OHSteriod_DH/Estase; Male_sterile_NAD-bd
GRMZM2G026576	1.69537	0.626267	-3.02076			NA	NA	NA	NA
GRMZM2G125522	1.69334	1.86293	-1.36108			hypothetical protein LOC100192816 (LOC100192816), mRNA	hypothetical protein LOC100192816	DNA binding	Myb_DNA-bd; Homeodomain-like; SANT_DNA-bd; Myb-like+DNA-bd_dom_SHAQKYF
GRMZM2G341442	1.67176	2.04959	-0.600555			hypothetical protein LOC100192605 (LOC100192605), mRNA	hypothetical protein LOC100192605	integral to membrane;integral to membrane;integral to membrane	Tetraspanin; Tetraspanin_sub
GRMZM2G160565	1.66268	4.41353	-0.186011	bde1	bearded-ear1	MADS box protein (ZAG3), mRNA	MADS box protein	transcription factor activity;nucleus;regulation of transcription, DNA-dependent;sequence-specific DNA binding;transcription factor activity;nucleus;regulation of transcription, DNA-dependent	TF_Kbox
GRMZM2G420812	1.65943	1.14948	-2.5447			SAUR31 - auxin-responsive SAUR family member (LOC100282028), mRNA	SAUR31 - auxin-responsive SAUR family member	NA	Auxin_inducible
GRMZM2G061314	1.65404	1.04018	-2.63431			protein binding protein (LOC100280724), mRNA	protein binding protein;protein binding protein	protein binding;protein binding;protein binding	NA
GRMZM2G003944	1.63745	1.70412	-1.97673			hypothetical protein LOC100382180 (LOC100382180), mRNA	hypothetical protein LOC100382180	type I hypersensitivity;homoiothermy;ice binding;response to freezing	Transcription_factor_TCP; Antifreeze_1; POA_allergen_C
GRMZM2G006714	1.59991	1.47952	-1.13472			hypothetical protein LOC100382095 (LOC100382095), mRNA	hypothetical protein LOC100382095	NA	CaM-bd-like
GRMZM2G086766	1.57879	3.51648	-1.87422			hypothetical protein LOC100383504 (LOC100383504), mRNA	hypothetical protein LOC100383504	integral to membrane;amino acid transport;membrane;integral to membrane	Tetraspanin; Tetraspanin_sub; ArAA_permease
GRMZM5G834837	1.56376	1.83495	-0.924335			LOC100273136 (si660046c04), mRNA	LOC100273136	serine-type endopeptidase inhibitor activity	Protease_inhib_I4_serpin
GRMZM2G097683	1.56361	1.97696	-4.94729			NA	NA	homoiothermy;ice binding;response to freezing	DUF702; Antifreeze_1; K_chnl_volt-dep_Kv1.4; Znf_LRP1; LRP1_C
GRMZM2G102161	1.56037	1.23239	-0.239886	zmm8	Zea mays MADS8	NA	NA	transcription factor activity;nucleus;regulation of transcription, DNA-dependent;sequence-specific DNA binding	TF_MADSbox; TF_Kbox
GRMZM2G151444	1.54598	1.25623	-1.14826			hypothetical protein LOC100194371 (LOC100194371), mRNA	hypothetical protein LOC100194371	transcription factor activity;sequence-specific DNA binding;regulation of transcription	WRKY_DNA-bd
GRMZM2G071089	1.53962	1.31184	-0.727732			LOC100283627 (umc1162), mRNA	LOC100283627	structural constituent of ribosome;intracellular;ribosome;translation;membrane	NA
GRMZM2G520811	1.53536	1.12316	-1.26814			hypothetical protein LOC100192731 (LOC100192731), mRNA	NA	NA	NA
GRMZM2G085967	1.52749	1.4249	-1.47141			peroxidase 39 (LOC100283382), mRNA	peroxidase 39;peroxidase 39	peroxidase activity;response to oxidative stress;heme binding;oxidation reduction;peroxidase activity;response to oxidative stress;heme binding;oxidation reduction;peroxidase activity;response to oxidative stress;heme binding;oxidation reduction;peroxidase activity;response to oxidative stress;heme binding;oxidation reduction	Haem_peroxidase_pln/fun/bac; Haem_peroxidase; Peroxidases_heam-ligand_BS; Peroxidase_pln; Asc_peroxidase
GRMZM2G070468	1.50371	1.77091	-3.98545			NA	NA	transferase activity, transferring acyl groups other than amino-acyl groups	Transferase
GRMZM2G047129	1.47992	2.0673	-2.17415			alpha-L-fucosidase 2 (LOC100285541), mRNA	alpha-L-fucosidase 2	lipid metabolic process;hydrolase activity, acting on ester bonds;lipid metabolic process;hydrolase activity, acting on ester bonds	Lipase_GDSL; Esterase_SGNH_hydro-type
GRMZM2G021706	1.4656	2.7837	-0.0805596			hypothetical protein LOC100273779 (LOC100273779), mRNA	hypothetical protein LOC100273779	membrane	MtN3_saliva_TM_cons-reg
GRMZM2G307992	1.45479	0.839401	-0.565868			LOC100284511 (IDP643), mRNA;gamma-interferon-inducible lysosomal thiol reductase (LOC100285330), mRNA	LOC100284511;gamma-interferon-inducible lysosomal thiol reductase	NA	GILT; Thioredoxin-like_fold
GRMZM2G360519	1.44807	2.39851	-0.673251			NA	NA	NA	AA_transpt_TM
GRMZM2G035370	1.44677	1.90938	-2.52567			NA	NA	NA	Myb_DNA-bd; Homeodomain-like; Myb-like+DNA-bd_dom_SHAQKYF
GRMZM2G173809	1.443	0.438722	-1.93172			LOC100272711 (umc2194), mRNA	LOC100272711	negative regulation of translation;rRNA N-glycosylase activity	Ribosome_inactivat_prot; Ricin_B_lectin; Ricin_B-rel_lectin; Ribosome_inactivat_prot_subgr
GRMZM2G047713	1.44081	0.437567	-1.93329			LOC100272711 (umc2194), mRNA	LOC100272711	negative regulation of translation;rRNA N-glycosylase activity	Ribosome_inactivat_prot; Ricin_B_lectin; Ricin_B-rel_lectin; Ribosome_inactivat_prot_subgr
GRMZM2G121293	1.44063	0.599488	-2.01381			subtilisin-like protease (LOC100285183), mRNA	subtilisin-like protease	serine-type endopeptidase activity;proteolysis;identical protein binding;negative regulation of catalytic activity	Prot_inh_S8A; Peptidase_S8/S53; Protease-assoc_domain; Peptidase_S8/S53_AS
GRMZM5G891187	1.44061	2.1152	-0.483305			nodulin-like protein (LOC100283255), mRNA	nodulin-like protein	membrane	DMT
GRMZM2G104783	1.42171	3.01928	-1.6637			hypothetical protein LOC100274430 (LOC100274430), mRNA	hypothetical protein LOC100274430	monooxygenase activity;iron ion binding;electron carrier activity;heme binding;oxidation reduction	Cyt_P450; Cyt_P450_CS; Cyt_P450_E_grp-I; Cyt_P450_B; Cyt_P450_E_grp-IV
AC195587.4_FG003	1.41924	1.20149	-0.699474			NA	NA	NA	DUF569; Actin_cross-linking
GRMZM2G061515	1.41737	1.65579	-2.32626			NA	NA	NA	GH3
GRMZM2G044107	1.39738	0.319083	-0.772484			hypothetical protein LOC100280356 (LOC100280356), mRNA	NA	nucleic acid binding;hydrolase activity, hydrolyzing O-glycosyl compounds;carbohydrate metabolic process;methyltransferase activity;methylation;nucleic acid binding;hydrolase activity, hydrolyzing O-glycosyl compounds;carbohydrate metabolic process;methyltransferase activity;methylation	Glyco_hydro_3_N; Glyco_hydro_catalytic_core; DNA_methylase_N6_adenine_CS
GRMZM2G134306	1.37469	1.02108	-0.268058			NA	NA	NA	NA
GRMZM2G100524	1.3653	1.45935	-2.02167			hypothetical protein LOC100274879 (LOC100274879), mRNA	hypothetical protein LOC100274879	NA	NA
GRMZM2G067225	1.35582	0.485658	-1.06254			allene oxide synthase (aos), mRNA	allene oxide synthase	monooxygenase activity;iron ion binding;electron carrier activity;heme binding	Cyt_P450; Cyt_P450_E_grp-IV
GRMZM2G358791	1.34834	0.410374	-1.57321			hypothetical protein LOC100273969 (LOC100273969), mRNA	hypothetical protein LOC100273969	serine-type endopeptidase activity;transporter activity;proteolysis;transport;dicarboxylic acid transport;membrane;sodium:dicarboxylate symporter activity;transmembrane transport	Xant/urac/vitC; Peptidase_S1B_tx; Na-dicarboxylate_symporter
GRMZM2G178686	1.34319	2.09721	-0.593664			NA	NA	NA	NA
GRMZM2G430807	1.34049	1.24324	-2.98978			metallothionein-like protein type 2 (LOC100280527), mRNA;metallothionein-like protein type 2 (LOC100282059), mRNA	metallothionein-like protein type 2;metallothionein-like protein type 2	metal ion binding	Metallthion_15p; EGF-like_reg_CS
GRMZM2G139963	1.32931	1.7536	-1.26981			homeobox-leucine zipper protein HAT7 (LOC100283939), mRNA	homeobox-leucine zipper protein HAT7	DNA binding;transcription factor activity;nucleus;regulation of transcription, DNA-dependent;transcription regulator activity;sequence-specific DNA binding	NA
AC186231.4_FG002	1.3152	3.62673	-0.378194			hypothetical protein LOC100272479 (LOC100272479), mRNA	hypothetical protein LOC100272479	chromatin;DNA binding;structural constituent of cell wall;nucleus;regulation of transcription, DNA-dependent	HMGI/HMGY; Pistil_extensin
GRMZM2G017606	1.31126	1.3032	-2.83084			SHI (LOC100284538), mRNA	SHI	type I hypersensitivity	DUF702; POA_allergen_C; Znf_LRP1; LRP1_C
GRMZM2G136970	1.30608	2.86626	-0.76423			NA	NA	NA	NA
GRMZM2G011071	1.27064	1.88945	-0.749664			hypothetical protein LOC100274758 (LOC100274758), mRNA	hypothetical protein LOC100274758	NA	NA
GRMZM2G052509	1.26709	0.557638	-1.63489			ras-related protein Rab11A (LOC100285596), mRNA	ras-related protein Rab11A	GTPase activity;protein binding;GTP binding;intracellular;intracellular protein transport;nucleocytoplasmic transport;signal transduction;small GTPase mediated signal transduction;protein transport	MIRO-like; Ras; ARF; GTPase_Ras; GTPase_Rab; GTPase_Rho; Ran_GTPase; Ras_GTPase; ARF/SAR; Small_GTP-bd
GRMZM2G363429	1.26089	0.298195	-0.319794			NA	NA	monooxygenase activity;iron ion binding;electron carrier activity;heme binding;oxidation reduction;monooxygenase activity;iron ion binding;electron carrier activity;heme binding	Cyt_P450
GRMZM2G095725	1.25692	2.74354	-1.12517			beta-fructofuranosidase, insoluble isoenzyme 2 (LOC100285169), mRNA	beta-fructofuranosidase, insoluble isoenzyme 2	hydrolase activity, hydrolyzing O-glycosyl compounds;carbohydrate metabolic process;hydrolase activity, hydrolyzing O-glycosyl compounds;carbohydrate metabolic process	NA
GRMZM2G372074	1.25662	1.02265	-0.501383			hypothetical protein LOC100273286 (LOC100273286), mRNA;LOC100281790 (gpm470), mRNA;36.4 kDa proline-rich protein (LOC100282461), mRNA	hypothetical protein LOC100273286;LOC100281790;36.4 kDa proline-rich protein	NA	LTP/seed_store/tryp_amyl_inhib; Bifunc_inhib/LTP/seed_store
GRMZM2G126285	1.25452	1.64709	-2.95691			chloroplastic quinone-oxidoreductase (LOC100283038), mRNA	chloroplastic quinone-oxidoreductase	oxidoreductase activity;oxidoreductase activity	ADH_GroES-like; GroES-like
GRMZM2G002119	1.24969	2.22332	-2.16805			NA	NA	DNA binding;transcription factor activity;regulation of transcription, DNA-dependent	TF_ERF_DNA-bd; DNA-bd_integrase-typ
GRMZM2G006631	1.24361	0.310217	-0.974889			NA	NA	nucleus;transcription regulator activity;regulation of transcription	HLH_DNA-bd_dom; HLH_DNA-bd
GRMZM2G335359	1.24343	0.801738	-2.38159			NA	NA	NA	NA
GRMZM2G141031	1.24218	1.67928	-2.54597			hypothetical protein LOC100383692 (LOC100383692), mRNA	hypothetical protein LOC100383692	voltage-gated potassium channel activity;intracellular;potassium ion transport;zinc ion binding;integral to membrane	NA
GRMZM2G343149	1.23748	3.50519	-2.45114			dnaJ domain containing protein (LOC100281852), mRNA	dnaJ domain containing protein	iron ion binding;protein folding;electron carrier activity;heat shock protein binding;unfolded protein binding	DnaJ_N; Hsp_DnaJ; 3Fe4S_ferredoxin
GRMZM2G080442	1.2359	1.85228	-0.235939			NA	NA	NA	NA
GRMZM2G157936	1.22707	0.313123	-2.80177			NA	NA	NA	Haem_Oase-like_multi-hlx
GRMZM2G172214	1.22164	0.725908	-0.677361			LOC100282160 (cl11049_1), mRNA	LOC100282160	NA	NA
GRMZM2G122053	1.20889	2.49483	-1.89063			hypothetical protein LOC100383050 (LOC100383050), mRNA;LOC100193956 (TIDP3704), mRNA	hypothetical protein LOC100383050;LOC100193956;hypothetical protein LOC100383050	homoiothermy;ice binding;response to freezing;homoiothermy;ice binding;response to freezing;homoiothermy;ice binding;response to freezing;homoiothermy;ice binding;response to freezing	Antifreeze_1
AC211676.4_FG001	1.19738	0.668391	-1.86071			NA	NA	NA	NA
GRMZM2G061963	1.19675	0.869187	-1.72171			hypothetical protein LOC100274887 (LOC100274887), mRNA;hypothetical protein LOC100303959 (LOC100303959), mRNA	hypothetical protein LOC100274887;hypothetical protein LOC100303959	NA	NA
GRMZM2G081589	1.18128	1.18922	-0.618585			hypothetical protein LOC100273131 (LOC100273131), mRNA	hypothetical protein LOC100273131	integral to plasma membrane;sucrose transmembrane transporter activity;sucrose transport;transmembrane transport	MFS_1; MFS_general_subst_transpt; Suc_symporter_pln
GRMZM2G035557	1.17376	1.66879	-1.67832			hypothetical protein LOC100191804 (LOC100191804), mRNA	hypothetical protein LOC100191804	calcium ion binding	EF-hand; EF_hand_Ca-bd; EF_Hand_1_Ca_BS
GRMZM2G149996	1.17074	1.70905	-2.44122			NA	NA	aspartic-type endopeptidase activity;proteolysis	Peptidase_A1; Peptidase_aspartic; Peptidase_aspartic_AS
GRMZM2G090419	1.16886	2.44156	-1.37023			LOC100193744 (umc2509), mRNA	LOC100193744	hydrolase activity	NUDIX_hydrolase_dom; NUDIX_hydrolase_dom-like; NUDIX_hydrolase_CS; Nudix_hydrolase
GRMZM2G138268	1.1645	0.543047	-0.681313			IAA30 - auxin-responsive Aux/IAA family member (LOC100284259), mRNA	IAA30 - auxin-responsive Aux/IAA family member	nucleus;regulation of transcription;nucleus;regulation of transcription;nucleus;regulation of transcription	AUX_IAA
GRMZM2G076943	1.15584	2.79956	-0.872883			hypothetical protein LOC100279957 (LOC100279957), mRNA	hypothetical protein LOC100279957	protein kinase activity;protein serine/threonine kinase activity;ATP binding;protein amino acid phosphorylation	DUF26; Se/Thr_prot_kinase-like_dom; Ser-Thr/Tyr-Pkinase; Kinase-like_dom; Tyr_Pkinase_cat_dom; Ser/Thr_prot_kinase_dom; Protein_kinase_ATP_BS; Ser/Thr_prot_kinase_AS
GRMZM2G041127	1.15198	0.593858	-1.26869			LOC100194336 (si606017c07), mRNA	LOC100194336	DNA binding;transcription factor activity;nucleus;regulation of transcription, DNA-dependent;transcription regulator activity;sequence-specific DNA binding;DNA binding;transcription factor activity;nucleus;regulation of transcription, DNA-dependent;transcription regulator activity;sequence-specific DNA binding;DNA binding;transcription factor activity;nucleus;regulation of transcription, DNA-depe…	Homeobox; Leu_zip_homeo; Homeodomain-like; HTH_lambrepressr; Homeobox_region; Homeobox_CS
GRMZM2G146219	1.14681	2.33429	-0.969103			LOC100276376 (TIDP3268), mRNA	LOC100276376	NA	NA
GRMZM2G168744	1.14504	1.71501	-2.28027			hypothetical protein LOC100272515 (LOC100272515), mRNA;hypothetical protein LOC100273742 (LOC100273742), mRNA	hypothetical protein LOC100272515;hypothetical protein LOC100272515;hypothetical protein LOC100273742	nucleic acid binding;endonuclease activity;DNA catabolic process;hydrolase activity, acting on ester bonds;nucleic acid binding;endonuclease activity;DNA catabolic process;hydrolase activity, acting on ester bonds;nucleic acid binding;endonuclease activity;DNA catabolic process;hydrolase activity, acting on ester bonds	S1/P1nuclease; Phospholipase_C/P1_nuclease
GRMZM2G465723	1.14364	1.67185	-1.94364			hsp20/alpha crystallin family protein (LOC100284197), mRNA	hsp20/alpha crystallin family protein	NA	Hsp20; HSP20-like_chaperone
GRMZM2G135277	1.13852	1.76067	-1.49342			hypothetical protein LOC100383092 (LOC100383092), mRNA	hypothetical protein LOC100383092	alcohol dehydrogenase (NAD) activity;metabolic process;2,3-dihydro-2,3-dihydroxybenzoate dehydrogenase activity;enterobactin biosynthetic process;oxidoreductase activity;oxidation reduction;metabolic process;2,3-dihydro-2,3-dihydroxybenzoate dehydrogenase activity;enterobactin biosynthetic process;oxidoreductase activity;oxidation reduction	DH_sc/Rdtase_SDR; PKS_KR; Glc/ribitol_DH; DHB_DH
GRMZM2G009837	1.13235	4.20632	-1.84184			hypothetical protein LOC100194000 (LOC100194000), mRNA	hypothetical protein LOC100194000	nucleus;transcription regulator activity;homoiothermy;regulation of transcription;ice binding;response to freezing;homoiothermy;ice binding;response to freezing;nucleus;transcription regulator activity;regulation of transcription	HLH_DNA-bd
GRMZM2G085392	1.12956	2.54559	-2.66687			early nodulin-like protein 3 (LOC100280850), mRNA	early nodulin-like protein 3	copper ion binding;extracellular region;electron carrier activity	Plcyanin-like; Cupredoxin; Dense_granule_Gra7_protein
GRMZM2G102714	1.1274	1.65934	-1.04716			nuclease (LOC100281257), mRNA	nuclease	nucleic acid binding;nuclease activity;hydrolase activity, acting on ester bonds;homoiothermy;ice binding;response to freezing;nucleic acid binding;nuclease activity;hydrolase activity, acting on ester bonds;homoiothermy;ice binding;response to freezing	Staphylococcal_nuclease; Staphylococal_nuclease_OB-fold; Thermonucl_AS; Antifreeze_1
GRMZM2G419953	1.12618	5.12317	-2.6844			hypothetical protein LOC100192080 (LOC100192080), mRNA	hypothetical protein LOC100192080	peroxidase activity;response to oxidative stress;heme binding;oxidation reduction	Haem_peroxidase_pln/fun/bac; Haem_peroxidase; Peroxidase_pln; Asc_peroxidase; Peroxidases_heam-ligand_BS; Peroxidases_AS
GRMZM2G167794	1.11915	1.38685	-0.845432			LOC100192924 (umc1527), mRNA	LOC100192924	nucleus;regulation of transcription	AUX_IAA
GRMZM2G137421	1.11351	0.413818	-1.77746			hypothetical protein LOC100279849 (LOC100279849), mRNA	hypothetical protein LOC100279849	transporter activity;oligopeptide transport;membrane	NA
GRMZM2G068220	1.09689	1.22423	-1.38534			NA	NA	transporter activity;transport;membrane;transmembrane transport	Xant/urac/vitC
GRMZM2G321041	1.09316	1.21193	-3.3272			hypothetical protein LOC100192077 (LOC100192077), mRNA;hypothetical protein LOC100279177 (LOC100279177), mRNA	hypothetical protein LOC100192077;hypothetical protein LOC100279177	magnesium ion binding;protein binding;zinc ion binding;transferase activity;thiamin pyrophosphate binding	Znf_C3HC4_RING-type; Znf_RING-CH; Znf_RING; TPP-bd_CS
GRMZM2G021624	1.09269	0.613221	-0.749896			receptor-like protein kinase RK20-1 (LOC100283379), mRNA;hypothetical protein LOC100272959 (LOC100272959), mRNA	receptor-like protein kinase RK20-1;hypothetical protein LOC100272959	protein kinase activity;protein serine/threonine kinase activity;ATP binding;protein amino acid phosphorylation;protein kinase activity;protein serine/threonine kinase activity;ATP binding;protein amino acid phosphorylation;protein kinase activity;protein serine/threonine kinase activity;ATP binding;protein amino acid phosphorylation	DUF26; Se/Thr_prot_kinase-like_dom; Ser-Thr/Tyr-Pkinase; Kinase-like_dom; Tyr_Pkinase_cat_dom; Ser/Thr_prot_kinase_dom; Ser/Thr_prot_kinase_AS; Integrin_alpha_C_CS
GRMZM2G371345	1.09221	1.02065	-0.28453			NA	NA	NA	NA
GRMZM2G087254	1.0907	0.858649	-1.37981			adenosine 5'-phosphosulfate reductase 2 (APRL2), mRNA	adenosine 5'-phosphosulfate reductase 2	metabolic process;oxidoreductase activity, acting on sulfur group of donors, disulfide as acceptor;transferase activity;sulfate reduction;cell redox homeostasis;oxidation reduction	PAPS_reduct; Thioredoxin_domain; Thioredoxin-like_fold; Thioredoxin-indep_APS_Rdtase
GRMZM2G036547	1.08522	2.12585	-0.0418539			hypothetical protein LOC100191264 (LOC100191264), mRNA	hypothetical protein LOC100191264	NA	NA
GRMZM2G168404	1.08207	1.11647	-1.15085			NA	NA	monooxygenase activity;iron ion binding;electron carrier activity;heme binding	Cyt_P450; Cyt_P450_E_grp-IV
GRMZM2G023840	1.05957	2.08704	-0.0722783			NA	NA	peroxidase activity;response to oxidative stress;heme binding;oxidation reduction	Haem_peroxidase_pln/fun/bac; Haem_peroxidase; Peroxidase_pln; Asc_peroxidase; Ligninase; Peroxidases_heam-ligand_BS; Peroxidases_AS
GRMZM2G075492	1.05806	3.3574	-1.32016			NA	NA	membrane	Exostosin
GRMZM2G001514	1.05713	0.955354	-1.33172			LOC100283035 (pco137326), mRNA	LOC100283035	DNA binding;ligand-dependent nuclear receptor activity;nucleus;regulation of transcription, DNA-dependent;type I hypersensitivity	FAS1_domain; NOR1_rcpt; POA_allergen_C
GRMZM2G426175	1.05256	2.84892	-2.17113			NA	NA	iron ion binding;oxidoreductase activity;oxidation reduction	Oxoglutarate/Fe-dep_oxygenase; Isopenicillin-N_synthase
GRMZM2G166245	1.05119	1.06528	-2.42285			hypothetical protein LOC100382087 (LOC100382087), mRNA	hypothetical protein LOC100382087	carbohydrate metabolic process;phosphotransferase activity, alcohol group as acceptor;carbohydrate metabolic process;phosphotransferase activity, alcohol group as acceptor	Carb_kinase_FGGY_N
GRMZM2G343048	1.05088	1.55535	-0.0999257			hypothetical protein LOC100303855 (LOC100303855), mRNA	NA	NA	NA
GRMZM2G074914	1.05016	1.98024	-1.10751			hypothetical protein LOC100273767 (LOC100273767), mRNA	hypothetical protein LOC100273767	NA	AB_hydrolase_1
GRMZM2G344911	1.04087	0.821856	-1.33084			estradiol 17-beta-dehydrogenase 8 (LOC100284513), mRNA	estradiol 17-beta-dehydrogenase 8	catalytic activity;alcohol dehydrogenase (NAD) activity;metabolic process;2,3-dihydro-2,3-dihydroxybenzoate dehydrogenase activity;enterobactin biosynthetic process;oxidoreductase activity;cellular metabolic process;coenzyme binding;oxidation reduction	DH_sc/Rdtase_SDR; PKS_KR; Epimerase_deHydtase; Sc_DH/Rdtase_CS; Glc/ribitol_DH; DHB_DH; Insect_AlcDH_fam
GRMZM2G074097	1.04002	2.88346	-1.80882			thiamine biosynthetic enzyme (thi1-2), mRNA	thiamine biosynthetic enzyme	thiamin biosynthetic process;oxidoreductase activity	FAD-dep_OxRdtase; Thi4
GRMZM2G133057	1.03624	2.1116	-0.52037			hypothetical protein LOC100216653 (LOC100216653), mRNA	hypothetical protein LOC100216653	NA	UBX; UAS
GRMZM2G076348	1.03464	1.04835	-0.43141			NA	NA	hydrolase activity	NA
GRMZM2G060891	1.032	0.777786	-1.68564			hypothetical protein LOC100381805 (LOC100381805), mRNA	hypothetical protein LOC100381805	NA	DiseaseR/Znf/csome_condsation
GRMZM2G373322	1.02877	0.595942	-0.985632			NA	NA	protein binding	Leu-rich_rpt
GRMZM2G096591	1.02595	1.78365	-2.12627			glucan endo-1,3-beta-glucosidase 7 (LOC100284486), mRNA	glucan endo-1,3-beta-glucosidase 7	hydrolase activity, hydrolyzing O-glycosyl compounds;carbohydrate metabolic process;hydrolase activity, hydrolyzing O-glycosyl compounds;carbohydrate metabolic process	Glyco_hydro_17; Glyco_hydro_catalytic_core
AC233899.1_FG002	1.01866	0.442275	-1.46235			hypothetical protein LOC100273916 (LOC100273916), mRNA	hypothetical protein LOC100273916	nucleus;transcription regulator activity;regulation of transcription	HLH_DNA-bd_dom; HLH_DNA-bd
GRMZM2G125923	1.01349	0.902168	-2.51957			hypothetical protein LOC100279620 (LOC100279620), mRNA	hypothetical protein LOC100279620	prephenate dehydratase activity;L-phenylalanine biosynthetic process	Preph_deHydtase; Preph_deHydtase_CS
GRMZM2G134708	1.00136	0.99201	-0.770695			hypothetical protein LOC100382120 (LOC100382120), mRNA	hypothetical protein LOC100382120	potassium ion transport;cation transmembrane transporter activity;oxidoreductase activity;FAD binding;oxidation reduction	FAD_pyr_nucl-diS_OxRdtase; Pyr_OxRdtase_NAD-bd; FAD/NAD-linked_Rdtase_dimer; Pyridine_nuc-diS_OxRdtase_2; K_uptake_TrkA
GRMZM2G154766	0.988868	1.58103	-1.80034			NA	NA	protein kinase activity;protein serine/threonine kinase activity;binding;ATP binding;protein amino acid phosphorylation	Lectin_legB; Se/Thr_prot_kinase-like_dom; Ser-Thr/Tyr-Pkinase; Kinase-like_dom; ConA-like_lec_gl; Tyr_Pkinase_cat_dom; Ser/Thr_prot_kinase_dom; Protein_kinase_ATP_BS; Ser/Thr_prot_kinase_AS; Lectin_legB_Mn/Ca_BS
GRMZM2G061655	0.986288	1.35916	-1.77506			hypothetical protein LOC100193980 (LOC100193980), mRNA;hypothetical protein LOC100276115 (LOC100276115), mRNA	hypothetical protein LOC100193980;hypothetical protein LOC100276115	NA	NA
GRMZM2G172758	0.983529	0.632984	-0.400729			LOC100274862 (umc1948), mRNA	LOC100274862	NA	NA
GRMZM2G147809	0.983336	2.3659	-0.643059			LOC100285109 (si946043h04a), mRNA	LOC100285109	protein binding;zinc ion binding	Znf_C3HC4_RING-type; Znf_RING; Znf_RING_CS
GRMZM2G114619	0.982036	0.800556	-1.52474			actin binding protein (LOC100281805), mRNA	actin binding protein	actin binding;cellular component organization;actin cytoskeleton organization;DNA binding;actin binding;ligand-dependent nuclear receptor activity;nucleus;regulation of transcription, DNA-dependent;cellular component organization;actin cytoskeleton organization	FH2_actin-bd; Actin-bd_FH2/DRF_autoreg; NOR1_rcpt
GRMZM2G077356	0.980982	0.541729	-1.29654			IAA13 - auxin-responsive Aux/IAA family member (LOC100283579), mRNA;hypothetical protein LOC100384262 (LOC100384262), mRNA	IAA13 - auxin-responsive Aux/IAA family member;hypothetical protein LOC100384262	nucleus;regulation of transcription	AUX_IAA
GRMZM2G090469	0.97731	1.70797	-2.03395			NA	NA	hydrolase activity, hydrolyzing O-glycosyl compounds;carbohydrate metabolic process	Glyco_hydro_17; X8; Glyco_hydro_catalytic_core
GRMZM5G834199	0.977289	1.70797	-2.03404			NA	NA	hydrolase activity, hydrolyzing O-glycosyl compounds;carbohydrate metabolic process	Glyco_hydro_17; X8; Glyco_hydro_catalytic_core
GRMZM2G027052	0.972729	2.17424	-2.97668			NA	NA	homoiothermy;ice binding;response to freezing	DUF828; PH_pln; Pleckstrin_homology; Antifreeze_1
GRMZM2G159285	0.969167	2.03135	-0.578639			LOC100284262 (umc1534), mRNA	LOC100284262	nucleus;regulation of transcription;nucleus;regulation of transcription	AUX_IAA
GRMZM2G316030	0.96481	1.89965	-2.70238			NA	NA	metabolic process;transferase activity, transferring hexosyl groups	UDP_glucos_trans
GRMZM2G130302	0.961475	2.67855	-3.07864			hypothetical protein LOC100277681 (LOC100277681), mRNA	hypothetical protein LOC100277681	NA	DUF668
GRMZM2G004548	0.955419	1.21914	-1.91891			NA	NA	intracellular;zinc ion binding	DUF597; Znf_B-box
GRMZM2G096048	0.945345	2.06625	-2.00051			NA	NA	NA	NA
GRMZM2G426888	0.936237	0.885702	-4.23943			NA	NA	NA	Pentatricopeptide_repeat; TPR-4
GRMZM2G018375	0.933104	4.18059	-2.19851			thiamine biosynthetic enzyme (thi1-1), mRNA	thiamine biosynthetic enzyme	thiamin biosynthetic process;oxidoreductase activity;thiamin biosynthetic process;oxidoreductase activity	FAD-dep_OxRdtase; Thi4
GRMZM2G007953	0.930262	1.02379	-0.880828			hypothetical protein LOC100279417 (LOC100279417), mRNA	hypothetical protein LOC100279417	membrane;glutamate 5-kinase activity;proline biosynthetic process;membrane	DMT; Glu_5kinase
GRMZM2G083526	0.925084	0.420788	-1.84237			hypothetical protein LOC100280351 (LOC100280351), mRNA	hypothetical protein LOC100280351;hypothetical protein LOC100280351	iron ion binding;endoplasmic reticulum;fatty acid biosynthetic process;oxidoreductase activity;oxidation reduction	NA
GRMZM2G095254	0.924378	0.714007	-0.787138			hypothetical protein LOC100278733 (LOC100278733), mRNA	hypothetical protein LOC100278733	nucleotide binding;ATP binding;nucleoside-triphosphatase activity	ATPase_AAA_core; ATPase_AAA+_core; ATPase_AAA_CS
GRMZM2G328094	0.919405	1.07251	-1.32148			NADP-dependent oxidoreductase P1 (LOC100282970), mRNA	NADP-dependent oxidoreductase P1	zinc ion binding;oxidoreductase activity;oxidation reduction	ADH_C
GRMZM2G071602	0.915346	1.22871	-1.42349			LOC100272915 (umc1586), mRNA	LOC100272915	protein binding;zinc ion binding	NA
GRMZM2G042865	0.91092	0.509582	-1.97769			hypothetical protein LOC100191999 (LOC100191999), mRNA	hypothetical protein LOC100191999	metabolic process;transferase activity, transferring hexosyl groups	UDP_glucos_trans
GRMZM2G055135	0.899569	0.978421	-0.582443			LOC100285579 (TIDP2780), mRNA	LOC100285579;LOC100285579	NA	Znf_LSD1
GRMZM2G150351	0.896683	1.96348	-0.140311			hypothetical protein LOC100272588 (LOC100272588), mRNA	hypothetical protein LOC100272588	NA	NA
GRMZM2G358051	0.887926	0.171392	-0.153608			hypothetical protein LOC100279387 (LOC100279387), mRNA	hypothetical protein LOC100279387	alcohol dehydrogenase (NAD) activity;metabolic process;oxidoreductase activity;oxidation reduction;alcohol dehydrogenase (NAD) activity;metabolic process;oxidoreductase activity;oxidation reduction;transmembrane transport;alcohol dehydrogenase (NAD) activity;metabolic process;oxidoreductase activity;oxidation reduction	DH_sc/Rdtase_SDR; Glc/ribitol_DH; Insect_AlcDH_fam
GRMZM2G121312	0.886168	1.04045	-3.17893			polygalacturonase inhibitor 2 (LOC100284303), mRNA	polygalacturonase inhibitor 2	protein binding	LRR-contain_N2; Leu-rich_rpt; Leu-rich_rpt_typical-subtyp
GRMZM2G142609	0.884209	0.261975	-0.226246			hypothetical protein LOC100304387 (LOC100304387), mRNA	hypothetical protein LOC100304387	NA	NA
GRMZM2G368411	0.883539	2.03363	-2.66491			hypothetical protein LOC100383979 (LOC100383979), mRNA	NA	iron ion binding;oxidoreductase activity;oxidation reduction	Oxoglutarate/Fe-dep_oxygenase; Isopenicillin-N_synthase
GRMZM2G073079	0.881415	1.11324	-0.812652			NA	NA	hydrolase activity	K_chnl_volt-dep_Kv1.4
GRMZM2G080530	0.880565	0.508891	-2.12086			LOC100191600 (pco103007a), mRNA	LOC100191600;LOC100191600	protein binding;protein binding	Leu-rich_rpt; Leu-rich_rpt_typical-subtyp
GRMZM2G138589	0.878774	1.12652	-1.13039			LOC100284344 (IDP2462), mRNA	LOC100284344	transporter activity;transport;membrane;integral to membrane;substrate-specific transmembrane transporter activity;transmembrane transport	Sub_transporter; MFS_1; MFS_general_subst_transpt; Sugar/inositol_transpt; Sugar_transporter_CS
GRMZM2G420733	0.878467	0.842616	-2.71741			LOC100273230 (IDP725), mRNA	LOC100273230	NA	Disease-R_pln
AC208897.3_FG004	0.878085	0.778606	-0.650192			NA	NA	transporter activity;transport;membrane;integral to membrane;substrate-specific transmembrane transporter activity;transmembrane transport	Sub_transporter; MFS_1; MFS_general_subst_transpt; Sugar/inositol_transpt; Sugar_transporter_CS
GRMZM2G177227	0.876265	0.828786	-1.74946			hypothetical protein LOC100192942 (LOC100192942), mRNA	hypothetical protein LOC100192942	exocyst;exocytosis;exocyst;exocytosis	Exo70
GRMZM2G303915	0.873445	0.847394	-0.904363			hypothetical protein LOC100279918 (LOC100279918), mRNA;hypothetical protein LOC100384706 (LOC100384706), mRNA	hypothetical protein LOC100279918	nucleic acid binding;nucleic acid binding;nucleic acid binding	RRM_RNP1; RNA-recognition_dom1
GRMZM2G148074	0.866951	1.66779	-3.06311			NA	NA	DNA binding;transcription factor activity;nucleus;transcription;regulation of transcription, DNA-dependent;transcription activator activity;transcription regulator activity;sequence-specific DNA binding;nucleus;transcription;transcription activator activity	HD-ZIP_N
GRMZM2G363554	0.863286	0.865927	-2.74812			NA	NA	metabolic process;transferase activity, transferring hexosyl groups	UDP_glucos_trans
GRMZM2G091540	0.854693	1.35169	-2.43362			hypothetical protein LOC100304432 (LOC100304432), mRNA	hypothetical protein LOC100304432	protein binding;metabolic process;hydrolase activity;protein binding;metabolic process;membrane;hydrolase activity;protein homooligomerization	Peptidase_M20_dimer; Peptidase_M20; Prion
GRMZM2G471670	0.83657	2.51663	-0.496265			hypothetical protein LOC100272383 (LOC100272383), mRNA	hypothetical protein LOC100272383	protein binding;protein metabolic process	Clp_N
GRMZM2G378604	0.829892	1.90816	-1.64928			LOC100281589 (pco137042), mRNA	LOC100281589	transporter activity;oligopeptide transport;membrane;transmembrane transport;transporter activity;oligopeptide transport;membrane;transmembrane transport	MFS_1; Oligopeptide_transporter; MFS_general_subst_transpt
GRMZM2G022212	0.820707	1.49164	-3.0416			NA	NA	metabolic process;transferase activity, transferring hexosyl groups	UDP_glucos_trans
GRMZM5G844562	0.817745	0.943846	-1.30752	bm1	brown midrib1	cinnamyl alcohol dehydrogenase (cad), mRNA	cinnamyl alcohol dehydrogenase	zinc ion binding;oxidoreductase activity;oxidation reduction;zinc ion binding;oxidoreductase activity;oxidation reduction;zinc ion binding;oxidoreductase activity;oxidation reduction	ADH_GroES-like; ADH_C; GroES-like; ADH_Zn_CS
GRMZM2G040924	0.817249	0.389106	-1.14124			P-type R2R3 Myb protein (LOC100282111), mRNA	P-type R2R3 Myb protein	DNA binding	Myb_DNA-bd; Homeodomain-like; SANT_DNA-bd
GRMZM2G302293	0.808098	0.554477	-1.99451			hypothetical protein LOC100274883 (LOC100274883), mRNA	hypothetical protein LOC100274883	NA	NA
GRMZM2G110107	0.806083	1.36908	-2.02255			NA	NA	intracellular;zinc ion binding	Znf_C2H2; Znf_C2H2-like
GRMZM2G402714	0.797472	1.34377	-2.54472			NA	NA	NA	Ubiquitin; Ubiquitin_subgroup
GRMZM2G165987	0.793482	0.817897	-0.87234			pirin-like protein (LOC100284285), mRNA	pirin-like protein	NA	Pirin_N; Pirin_C; Cupin_RmlC_type; Pirin
GRMZM2G373928	0.788763	0.861313	-0.860438	zcn14	phosphatidylethanolamine-binding protein14	ZCN14 protein (ZCN14), mRNA	ZCN14 protein;ZCN14 protein	NA	PtdEtn-bd_prot_PEBP; Phosphotidylethanolamine-bd_CS
GRMZM2G158093	0.788569	0.475695	-0.292835			NA	NA	ATP binding	Hsp_70; Hsp70; Heat_shock_70_CS
GRMZM2G144504	0.788092	0.875752	-1.0785			LOC100193109 (si687016e08), mRNA	LOC100193109	Rho guanyl-nucleotide exchange factor activity;Rho guanyl-nucleotide exchange factor activity	Rop_nucl_exchang_PRONE
GRMZM2G330635	0.779749	0.818984	-1.03427			NA	NA	NA	Glutathione_S-Trfase_N; Thioredoxin-like_fold; Glutathione-S-Trfase_C-like
GRMZM2G075081	0.777201	2.05119	-0.180827	zcn4	phosphatidylethanolamine-binding protein4	ZCN4 protein (ZCN4), mRNA	ZCN4 protein	NA	PtdEtn-bd_prot_PEBP
GRMZM2G036409	0.775739	2.14146	-1.18188			anthocyanidin 5,3-O-glucosyltransferase (LOC100282183), mRNA	anthocyanidin 5,3-O-glucosyltransferase	metabolic process;transferase activity, transferring hexosyl groups	UDP_glucos_trans
GRMZM2G034985	0.767939	0.874105	-2.35169			hypothetical protein LOC100279506 (LOC100279506), mRNA	hypothetical protein LOC100279506	NA	NA
GRMZM2G038893	0.758706	1.39993	-2.64447			WAK-like kinase (LOC100281047), mRNA	WAK-like kinase	protein kinase activity;protein serine/threonine kinase activity;ATP binding;protein amino acid phosphorylation	Se/Thr_prot_kinase-like_dom; Ser-Thr/Tyr-Pkinase; Kinase-like_dom; Tyr_Pkinase_cat_dom; Ser/Thr_prot_kinase_dom; Protein_kinase_ATP_BS; Ser/Thr_prot_kinase_AS
GRMZM2G169558	0.74891	1.09143	-2.65699			protein kinase APK1A (LOC100283188), mRNA	protein kinase APK1A	protein kinase activity;protein serine/threonine kinase activity;ATP binding;protein amino acid phosphorylation	Ser-Thr/Tyr-Pkinase; Se/Thr_prot_kinase-like_dom; Kinase-like_dom; Tyr_Pkinase_cat_dom; Ser/Thr_prot_kinase_dom; Ser/Thr_prot_kinase_AS
GRMZM2G104394	0.747232	0.657282	-0.946991			peroxidase (pox1), mRNA	peroxidase	peroxidase activity;response to oxidative stress;heme binding;oxidation reduction	Haem_peroxidase_pln/fun/bac; Haem_peroxidase; Peroxidase_pln; Asc_peroxidase; Peroxidases_heam-ligand_BS; Peroxidases_AS
GRMZM2G129361	0.746436	1.14498	-2.92186			hypothetical protein LOC100276875 (LOC100276875), mRNA;hypothetical protein LOC100277444 (LOC100277444), mRNA	hypothetical protein LOC100276875;hypothetical protein LOC100277444	NA	NA
GRMZM2G172429	0.745838	1.41659	-1.49088			hypothetical protein LOC100279517 (LOC100279517), mRNA	NA	protein kinase activity;protein serine/threonine kinase activity;protein binding;ATP binding;protein amino acid phosphorylation	LRR-contain_N2; Leu-rich_rpt; Se/Thr_prot_kinase-like_dom; Ser-Thr/Tyr-Pkinase; Kinase-like_dom; Leu-rich_rpt_typical-subtyp; Tyr_Pkinase_cat_dom; Ser/Thr_prot_kinase_dom; Protein_kinase_ATP_BS; Ser/Thr_prot_kinase_AS
GRMZM2G032547	0.741465	0.845842	-1.35123			NA	NA	NA	NA
GRMZM2G129642	0.740291	0.358151	-1.95914			hypothetical protein LOC100279621 (LOC100279621), mRNA	NA	NA	C2_Ca-dep; PRibTrfase_C; C2_Ca/lipid-bd_dom_CaLB; C2_region
GRMZM2G139073	0.736565	4.28596	-0.598766	si1	silky1	silky1 (si1), mRNA	silky1	transcription factor activity;nucleus;regulation of transcription, DNA-dependent;sequence-specific DNA binding;transcription factor activity;nucleus;regulation of transcription, DNA-dependent	TF_Kbox
GRMZM2G140651	0.730377	0.887357	-0.580403			RING-H2 finger protein ATL1Q (LOC100284391), mRNA;LOC100192846 (pco127689), mRNA	RING-H2 finger protein ATL1Q;LOC100192846	protein binding;zinc ion binding;voltage-gated chloride channel activity;protein binding;chloride transport;zinc ion binding;membrane;transmembrane transport;voltage-gated chloride channel activity;chloride transport;membrane;transmembrane transport;voltage-gated chloride channel activity;chloride transport;membrane;transmembrane transport	Cl-channel_volt-gated
GRMZM2G060150	0.729608	0.391019	-1.03356			hypothetical protein LOC100381851 (LOC100381851), mRNA	hypothetical protein LOC100381851;hypothetical protein LOC100381851	NA	NA
GRMZM2G066103	0.726519	0.420417	-1.05598			hypothetical protein LOC100381851 (LOC100381851), mRNA	hypothetical protein LOC100381851;hypothetical protein LOC100381851	NA	NA
GRMZM5G847505	0.726121	0.837017	-1.01985			NA	NA	NA	Beta-tubulin_BS; FkbM_mtfrase
GRMZM2G082227	0.72488	2.73714	-1.79769e+308			NA	NA	DNA binding;regulation of transcription, DNA-dependent	TF_B3
GRMZM2G004160	0.715655	0.329106	-1.14446			chemocyanin (LOC100284336), mRNA	chemocyanin	copper ion binding;electron carrier activity;copper ion binding;electron carrier activity	Plcyanin-like; Cupredoxin; BlueCu_1
GRMZM2G065245	0.715345	1.90278	-2.82877			NA	NA	monooxygenase activity;iron ion binding;electron carrier activity;heme binding;oxidation reduction	Cyt_P450; Cyt_P450_CS; Cyt_P450_E_grp-I; Cyt_P450_E_grp-IV; Cyt_P450_E_grp-II
GRMZM2G145909	0.712467	1.13255	-1.12404			hypothetical protein LOC100278375 (LOC100278375), mRNA	hypothetical protein LOC100278375;hypothetical protein LOC100278375	nucleus;transcription regulator activity;regulation of transcription;nucleus;transcription regulator activity;regulation of transcription	HLH_DNA-bd
GRMZM2G082007	0.707772	0.715801	-2.14773			LOC100283243 (si683005e02), mRNA	LOC100283243	O-methyltransferase activity	O_MeTrfase_2; O-MeTrfase_COMT_euk
GRMZM2G171116	0.704571	0.346453	-0.507434			NA	NA	glycine hydroxymethyltransferase activity;glycine metabolic process;L-serine metabolic process	Ser_HO-MeTrfase; PyrdxlP-dep_Trfase_major_dom
GRMZM2G409086	0.704536	1.22418	-2.89029			NA	NA	NA	NA
GRMZM2G138008	0.701204	1.09106	-1.74286			NA	NA	monooxygenase activity;iron ion binding;electron carrier activity;heme binding;oxidation reduction	Cyt_P450; Cyt_P450_CS; Cyt_P450_E_grp-I; Cyt_P450_E_grp-IV; Cyt_P450_B
GRMZM5G828987	0.694496	1.42128	-1.67293			NA	NA	hydrolase activity, hydrolyzing O-glycosyl compounds;carbohydrate metabolic process;hydrolase activity, hydrolyzing O-glycosyl compounds;carbohydrate metabolic process;hydrolase activity, hydrolyzing O-glycosyl compounds;carbohydrate metabolic process	Glyco_hydro_1; Glyco_hydro_catalytic_core; Glyco_hydro_1_AS
GRMZM2G174274	0.691514	0.417408	-2.58303			NA	NA	intracellular;signal transduction	PAK_box_Rho-bd; RhoGAP; Rho_GTPase_activation_prot
GRMZM2G354253	0.689624	1.77157	-1.55321			hypothetical protein LOC100280380 (LOC100280380), mRNA;hypothetical protein LOC100304015 (LOC100304015), mRNA	hypothetical protein LOC100280380;hypothetical protein LOC100304015	NA	NA
GRMZM2G149184	0.6895	0.946268	-1.62782			NA	NA	integral to membrane;transmembrane transport	Auxin_eff; Auxin_eff_plant
GRMZM2G091031	0.688701	0.888682	-0.419429			NA	NA	NA	NA
GRMZM2G110195	0.687615	0.904024	-1.6493			hypothetical protein LOC100274520 (LOC100274520), mRNA	hypothetical protein LOC100274520	NA	AA_transpt_TM
GRMZM2G305211	0.67981	0.526897	-0.193041			NA	NA	protein domain specific binding;triose-phosphate isomerase activity;metabolic process;protein domain specific binding	14-3-3; Triosephosphate_isomerase; Triosephosphate_isomerase_AS
GRMZM2G361611	0.676039	1.93743	-1.27782			ocs element-binding factor 1 (LOC100286318), mRNA	ocs element-binding factor 1	transcription factor activity;nucleus;regulation of transcription, DNA-dependent;sequence-specific DNA binding;protein dimerization activity	bZIP_1; bZIP_2; TF_bZIP
GRMZM2G091919	0.675327	0.979608	-1.74492			NA	NA	protein kinase activity;protein serine/threonine kinase activity;ATP binding;protein amino acid phosphorylation	Se/Thr_prot_kinase-like_dom; Ser-Thr/Tyr-Pkinase; Kinase-like_dom; Tyr_Pkinase_cat_dom; Ser/Thr_prot_kinase_dom; Protein_kinase_ATP_BS; Ser/Thr_prot_kinase_AS
GRMZM2G004356	0.671637	0.781536	-0.242156			LOC100285681 (pco139297), mRNA	LOC100285681	DNA binding;ligand-dependent nuclear receptor activity;nucleus;regulation of transcription, DNA-dependent;transcription regulator activity;regulation of transcription	HLH_DNA-bd_dom; HLH_DNA-bd; NOR1_rcpt
GRMZM5G826321	0.669659	0.606234	-0.429903			hypothetical protein LOC100272258 (LOC100272258), mRNA	hypothetical protein LOC100272258	metabolic process;hydrolase activity	AB_hydrolase_3
GRMZM2G090441	0.669612	1.3339	-1.77619			hypothetical protein LOC100383770 (LOC100383770), mRNA	hypothetical protein LOC100383770	hydrolase activity, hydrolyzing O-glycosyl compounds;chitinase activity;carbohydrate metabolic process;chitin catabolic process	Glyco_hydro18cat; Glyco_hydro_catalytic_core; Chitinase_II
GRMZM2G327686	0.666724	1.19562	-0.121622			hypothetical protein LOC100381563 (LOC100381563), mRNA	hypothetical protein LOC100381563	NA	UPF0114; UPF0114_pln
GRMZM2G301885	0.662747	0.598955	-1.61861			hypothetical protein LOC100274325 (LOC100274325), mRNA	hypothetical protein LOC100274325	transporter activity;transport;membrane;integral to membrane;substrate-specific transmembrane transporter activity;transmembrane transport;transporter activity;transport;membrane;integral to membrane;substrate-specific transmembrane transporter activity;transmembrane transport;transporter activity;transport;membrane;integral to membrane;substrate-specific transmembrane transporter activity;transm…	Sub_transporter; MFS_1; MFS_general_subst_transpt; Sugar_transporter_CS; Sugar/inositol_transpt
GRMZM2G009344	0.662352	1.12937	-1.13806			LOC100193377 (umc2598), mRNA	LOC100193377	NA	DUF250
GRMZM2G023051	0.661128	0.55102	-0.939722			hypothetical protein LOC100384146 (LOC100384146), mRNA	hypothetical protein LOC100384146;hypothetical protein LOC100384146	NA	NA
GRMZM2G009475	0.659172	3.47728	-1.49283			NA	NA	NA	NA
AC233850.1_FG009	0.656297	1.7488	-0.54395			hypothetical protein LOC100273545 (LOC100273545), mRNA	hypothetical protein LOC100273545	NA	NA
GRMZM2G043600	0.653224	1.4967	-2.21622			NA	NA	transcription factor activity;nucleus;regulation of transcription, DNA-dependent;sequence-specific DNA binding;protein dimerization activity	bZIP_1; bZIP_2; TF_bZIP; Leuzip_Jun
GRMZM2G049681	0.651641	0.695666	-0.596686			hypothetical protein LOC100384662 (LOC100384662), mRNA	hypothetical protein LOC100384662	NA	Ig/MHC_CS
GRMZM2G071450	0.645912	2.78106	-0.172763			hypothetical protein LOC100192779 (LOC100192779), mRNA;plastocyanin (LOC100281113), mRNA;hypothetical protein LOC100192779 (LOC100192779), mRNA;plastocyanin (LOC100281113), mRNA	hypothetical protein LOC100192779;plastocyanin;hypothetical protein LOC100192779;plastocyanin	copper ion binding;electron carrier activity;homoiothermy;ice binding;response to freezing;copper ion binding;electron carrier activity;homoiothermy;ice binding;response to freezing	BlueCu_1; Cupredoxin; Plastocyanin; Copper_blue; Amicyanin; Antifreeze_1
GRMZM2G160327	0.641805	0.468837	-2.15181			hypothetical protein LOC100384634 (LOC100384634), mRNA	hypothetical protein LOC100384634	peroxidase activity;response to oxidative stress;heme binding;oxidation reduction	Haem_peroxidase_pln/fun/bac; Haem_peroxidase; Peroxidase_pln; Asc_peroxidase; Peroxidases_heam-ligand_BS; Peroxidases_AS
GRMZM2G061469	0.640868	1.49963	-1.16098			LOC100281575 (umc2631), mRNA	LOC100281575;LOC100281575	integral to membrane;transmembrane transport;integral to membrane;transmembrane transport	C4dc/mal_transpt
GRMZM2G463415	0.635459	0.378144	-0.848167			LOC100276522 (si603009c10), mRNA	LOC100276522	NA	Epsin_N; ENTH_VHS; Epsin-like_N
GRMZM2G479112	0.632732	0.754791	-1.04126			hypothetical protein LOC100280012 (LOC100280012), mRNA	hypothetical protein LOC100280012	catalytic activity;metabolic process;hydrolase activity, acting on ester bonds	Phosphoesterase; Alkaline_phosphatase_core
GRMZM2G049373	0.627118	0.687886	-1.39853			hypothetical protein LOC100192790 (LOC100192790), mRNA;hypothetical protein LOC100193345 (LOC100193345), mRNA	hypothetical protein LOC100192790;hypothetical protein LOC100193345	protein folding;heat shock protein binding;unfolded protein binding	AT_hook-like
GRMZM2G119359	0.62638	0.805783	-0.555699			NA	NA	DNA binding;ligand-dependent nuclear receptor activity;nucleus;regulation of transcription, DNA-dependent	WRC
GRMZM2G128466	0.626335	1.09817	-2.12376			NA	NA	NA	FMN_red
GRMZM2G047208	0.62388	1.66751	-4.82822			early nodulin-like protein 1 (LOC100284010), mRNA	early nodulin-like protein 1	copper ion binding;electron carrier activity	Plcyanin-like; Cupredoxin
GRMZM2G162388	0.622721	1.6826	-0.583395			NA	NA	peptidyl-prolyl cis-trans isomerase activity;protein folding	PPIase_cyclophilin; Cyclophilin-like; Pep-Pro_Isoase_cyclophilin_CS
GRMZM2G098594	0.618992	0.902764	-1.39313			LOC100125644 (cl52038_1), mRNA	LOC100125644	ATP binding;nucleus;hydrolase activity, acting on acid anhydrides, in phosphorus-containing anhydrides;regulation of transcription;ATP binding;nucleus;hydrolase activity, acting on acid anhydrides, in phosphorus-containing anhydrides;regulation of transcription;ATP binding;nucleus;hydrolase activity, acting on acid anhydrides, in phosphorus-containing anhydrides;regulation of transcription;ATP bi…	Gln-Leu-Gln_QLQ
GRMZM2G326111	0.617117	0.318748	-0.636365			NA	NA	peptidyl-prolyl cis-trans isomerase activity;protein folding	PPIase_cyclophilin; Cyclophilin-like; Pep-Pro_Isoase_cyclophilin_CS
GRMZM2G116029	0.612494	1.24427	-2.33347			hypothetical protein LOC100275498 (LOC100275498), mRNA	hypothetical protein LOC100275498	NA	Meiotic_Spo11
GRMZM2G047187	0.607848	0.5506	-0.539048			hypothetical protein LOC100191596 (LOC100191596), mRNA;tetracycline transporter protein (LOC100284910), mRNA	hypothetical protein LOC100191596;tetracycline transporter protein	transporter activity;transport;tetracycline:hydrogen antiporter activity;tetracycline transport;membrane;integral to membrane;response to antibiotic;transmembrane transport;transporter activity;transport;membrane;transmembrane transport;transporter activity;transport;membrane;transmembrane transport;transporter activity;transport;membrane;transmembrane transport	MFS_1; MFS_general_subst_transpt; Sugar_transporter_CS
GRMZM2G180406	0.606457	0.502678	-0.290029			LOC100278938 (TIDP2951), mRNA;hypothetical protein LOC100382035 (LOC100382035), mRNA;LOC100278938 (TIDP2951), mRNA	LOC100278938;hypothetical protein LOC100382035;LOC100278938;hypothetical protein LOC100382035	nucleus;transcription regulator activity;regulation of transcription;nucleus;transcription regulator activity;regulation of transcription	HLH_DNA-bd_dom; HLH_DNA-bd
GRMZM2G059129	0.602918	1.14562	-0.0294157			NA	NA	glycerol metabolic process;lipid metabolic process;phosphoric diester hydrolase activity;glycerophosphodiester phosphodiesterase activity;glycerol metabolic process;lipid metabolic process;phosphoric diester hydrolase activity;glycerophosphodiester phosphodiesterase activity	GlyceroP-diester-Pdiesterase; PLC-like_Pdiesterase_TIM-brl
GRMZM2G142721	0.602765	2.40683	-3.08362			G1 protein (ZmG1), mRNA	G1 protein	NA	DUF640
GRMZM2G470608	0.601923	0.596049	-0.247879			NA	NA	structural constituent of ribosome;intracellular;ribosome;translation;large ribosomal subunit	KOW; Translation_prot_SH3-like; Ribosomal_L24/26_CS; Ribosomal_L26_euk/arc
GRMZM2G014770	0.597635	0.979797	-2.17441			transferase, transferring glycosyl groups (LOC100281407), mRNA	transferase, transferring glycosyl groups	transferase activity, transferring glycosyl groups;transferase activity, transferring glycosyl groups	Glyco_trans_8
GRMZM2G135526	0.584097	1.17265	-1.01802			hypothetical protein LOC100274499 (LOC100274499), mRNA	hypothetical protein LOC100274499	zinc ion binding;oxidoreductase activity;oxidation reduction;zinc ion binding;oxidoreductase activity;oxidation reduction	ADH_GroES-like; ADH_C; GroES-like
GRMZM2G391794	0.580454	0.810348	-1.97935			NA	NA	protein kinase activity;protein serine/threonine kinase activity;protein binding;ATP binding;protein amino acid phosphorylation;protein kinase activity;protein serine/threonine kinase activity;ATP binding;protein amino acid phosphorylation	LRR-contain_N2; Se/Thr_prot_kinase-like_dom; Ser-Thr/Tyr-Pkinase; Kinase-like_dom; Tyr_Pkinase_cat_dom; Ser/Thr_prot_kinase_dom; Protein_kinase_ATP_BS; Ser/Thr_prot_kinase_AS
GRMZM2G017186	0.573702	1.00979	-0.377706			LOC541703 (umc1721), mRNA	LOC541703;LOC541703;LOC541703;LOC541703;LOC541703;LOC541703;LOC541703;LOC541703;LOC541703	hydrolase activity, hydrolyzing O-glycosyl compounds;carbohydrate metabolic process;hydrolase activity, hydrolyzing O-glycosyl compounds;carbohydrate metabolic process;hydrolase activity, hydrolyzing O-glycosyl compounds;carbohydrate metabolic process;hydrolase activity, hydrolyzing O-glycosyl compounds;carbohydrate metabolic process;hydrolase activity, hydrolyzing O-glycosyl compounds;carbohydra…	Glyco_hydro_3_N; Glyco_hydro_catalytic_core
GRMZM2G066618	0.570159	0.685976	-3.1105			oxidoreductase (LOC100281666), mRNA	oxidoreductase	oxidoreductase activity;oxidoreductase activity, acting on CH-OH group of donors;regulation of GTPase activity;FAD binding	FAD-dep_OxRdtase; GMC_OxRdtase_N; GMC_OxRtase_C; AlcDH_FA_lc; FAD_pyr_nucl-diS_OxRdtase; Rab_GDI_REP
GRMZM2G174807	0.564004	0.840735	-0.686385			transmembrane protein (inra1(tmp)), mRNA	transmembrane protein	transporter activity;transport;membrane;integral to membrane;transmembrane transport;transporter activity;transport;hydrogen ion transmembrane transporter activity;ATP synthesis coupled proton transport;membrane;proton-transporting ATP synthase complex, coupling factor F(o);transporter activity;transport;membrane	MIP
GRMZM2G142661	0.562348	0.393551	-0.0982681			LOC100280467 (si614064h02), mRNA	LOC100280467	potassium ion transport;oxidoreductase activity;transmembrane transport;oxidation reduction;potassium ion transport;oxidoreductase activity;transmembrane transport;oxidation reduction;potassium ion transport;oxidoreductase activity;transmembrane transport;oxidation reduction	Aldo/ket_red; K_chnl_volt-dep_bsu_KCNAB-rel; Aldo/keto_reductase_sg
GRMZM2G031991	0.561644	0.607414	-2.24694			hypothetical protein LOC100277687 (LOC100277687), mRNA	hypothetical protein LOC100277687	NA	NA
GRMZM2G012062	0.559538	0.857819	-0.438112			NA	NA	serine-type endopeptidase activity;proteolysis	Peptidase_S8/S53; Protease-assoc_domain; Peptidase_S8/S53_AS
GRMZM2G361968	0.555345	0.586117	-2.56114			NA	NA	NA	NA
GRMZM2G178847	0.553359	0.833706	-0.589311			LOC100274633 (pco108346), mRNA;hypothetical protein LOC100274931 (LOC100274931), mRNA	LOC100274633;hypothetical protein LOC100274931	NA	NA
GRMZM2G377694	0.552068	3.94668	-1.7029			hypothetical protein LOC100275227 (LOC100275227), mRNA	hypothetical protein LOC100275227	NA	NA
GRMZM2G168108	0.550759	1.51678	-2.64113			K-exchanger-like protein (LOC100281209), mRNA	K-exchanger-like protein	integral to membrane;transmembrane transport	NaCa_Exmemb
GRMZM2G031941	0.544534	0.730941	-0.850957			hypothetical protein LOC100276794 (LOC100276794), mRNA	hypothetical protein LOC100276794	catalytic activity;oxidoreductase activity;FAD binding	Oxid_FAD_bind_N; BBE; FAD-bd_2
GRMZM2G145589	0.544515	0.811173	-0.222347			hypothetical protein LOC100191892 (LOC100191892), mRNA	hypothetical protein LOC100191892	serine-type endopeptidase activity;proteolysis;identical protein binding;negative regulation of catalytic activity	Prot_inh_S8A; Peptidase_S8/S53; Protease-assoc_domain; Peptidase_S8/S53_AS
GRMZM2G165828	0.530409	1.22734	-2.75595			hypothetical protein LOC100383810 (LOC100383810), mRNA	hypothetical protein LOC100383810	receptor activity;G-protein coupled receptor activity;GABA-B receptor activity;ionotropic glutamate receptor activity;transporter activity;ion channel activity;extracellular-glutamate-gated ion channel activity;transport;ion transport;G-protein coupled receptor protein signaling pathway;membrane;integral to membrane;outer membrane-bounded periplasmic space;GABA-B receptor activity;ionotropic glut…	ANF_lig-bd_rcpt; Iontro_glu_rcpt; GPCR_3_GABA_rcpt_B
GRMZM2G056600	0.526966	0.898658	-0.924149			LOC100272620 (cl52289_1b), mRNA	LOC100272620	DNA binding;transcription factor activity;nucleus;regulation of transcription, DNA-dependent;transcription regulator activity;sequence-specific DNA binding	Homeobox; Leu_zip_homeo; Homeodomain-like; HTH_lambrepressr; Homeobox_region; Homeobox_CS
GRMZM2G044383	0.525459	1.12443	-2.82439			glutathione transferase30 (gst30), mRNA	glutathione transferase30	glutathione transferase activity;cytoplasm;metabolic process;glutathione transferase activity;cytoplasm;metabolic process	Glutathione_S-Trfase_N; Glutathione-S-Trfase_C-like; Thioredoxin-like_fold; GST_omega
GRMZM2G092167	0.524535	0.945741	-0.626215			NA	NA	NA	NA
GRMZM2G392477	0.520452	0.360948	-0.599719			NA	NA	protein kinase activity;protein serine/threonine kinase activity;ATP binding;protein amino acid phosphorylation;protein serine/threonine kinase activity;ATP binding;protein amino acid phosphorylation	Kinase-like_dom; Ser/Thr_prot_kinase_dom
AC233893.1_FG006	0.516939	0.481283	-1.26905			NA	NA	protein kinase activity;protein serine/threonine kinase activity;protein binding;ATP binding;protein amino acid phosphorylation;homoiothermy;ice binding;response to freezing	LRR-contain_N2; Leu-rich_rpt; SKG6/AXL2_alpha-helix_TM; Ser-Thr/Tyr-Pkinase; Kinase-like_dom; Leu-rich_rpt_typical-subtyp; Tyr_Pkinase_cat_dom; Ser/Thr_prot_kinase_dom; Protein_kinase_ATP_BS; Antifreeze_1
GRMZM2G156127	0.516118	0.899835	-2.28392			cytokinin-N-glucosyltransferase 1 (LOC100283506), mRNA	cytokinin-N-glucosyltransferase 1	metabolic process;transferase activity, transferring hexosyl groups	UDP_glucos_trans
GRMZM2G376957	0.515066	0.702204	-0.31348			NA	Histone H3.2	nucleosome;DNA binding;nucleosome assembly	Histone_core_D; Histone-fold; Histone_H3
GRMZM2G124225	0.511739	1.09088	-0.376777			NA	NA	DNA binding;3-deoxy-7-phosphoheptulonate synthase activity;ligand-dependent nuclear receptor activity;nucleus;regulation of transcription, DNA-dependent;aromatic amino acid family biosynthetic process;DNA binding;ligand-dependent nuclear receptor activity;nucleus;regulation of transcription, DNA-dependent	NOR1_rcpt
GRMZM2G430052	0.510879	3.50418	-0.435841			calmodulin binding protein (LOC100284388), mRNA	calmodulin binding protein	NA	Auxin_inducible
GRMZM2G107686	0.503325	1.49824	-1.94321			NA	NA	serine-type endopeptidase activity;proteolysis;identical protein binding;negative regulation of catalytic activity	Prot_inh_S8A; Peptidase_S8/S53; Protease-assoc_domain; Peptidase_S8/S53_AS
GRMZM2G472167	0.496399	1.40653	-1.59203			peptide transporter PTR2 (LOC100281595), mRNA	peptide transporter PTR2	transporter activity;transport;oligopeptide transport;membrane;transporter activity;transport;oligopeptide transport;membrane	Oligopeptide_transporter; MFS_general_subst_transpt; LacY_symport_bac
GRMZM2G401040	0.491286	0.645278	-2.39059			ATP synthase F1, delta subunit family protein (LOC100281877), mRNA;ATP synthase F1, delta subunit family protein (LOC100304094), mRNA	ATP synthase F1, delta subunit family protein;ATP synthase F1, delta subunit family protein;ATP synthase F1, delta subunit family protein	DNA binding;DNA topoisomerase (ATP-hydrolyzing) activity;ATP binding;chromosome;plasma membrane;DNA topological change;ATP synthesis coupled proton transport;proton-transporting ATP synthase complex, catalytic core F(1);hydrogen ion transporting ATP synthase activity, rotational mechanism	ATPase_F1-cplx_OSCP/dsu; Topo_IIA_B
GRMZM2G127309	0.489973	0.52656	-1.23994			hypothetical protein LOC100193588 (LOC100193588), mRNA	hypothetical protein LOC100193588	nucleosome;DNA binding;nucleus;nucleosome assembly;nucleosome;DNA binding;nucleus;nucleosome assembly;nucleosome;DNA binding;nucleus;nucleosome assembly	X8; Histone_H4_CS
GRMZM5G870067	0.487447	1.31768	-1.08049			NA	NA	metabolic process;transferase activity, transferring hexosyl groups	UDP_glucos_trans
GRMZM2G410991	0.486078	0.854624	-0.643032			hypothetical protein LOC100384051 (LOC100384051), mRNA	hypothetical protein LOC100384051	cell wall macromolecule catabolic process;cell wall macromolecule catabolic process	Peptidoglycan-bd_lysin; Peptidoglycan-bd_Lysin_sg
GRMZM2G166906	0.484819	2.15885	-2.21181			protein HOTHEAD (LOC100283366), mRNA	protein HOTHEAD	oxidoreductase activity, acting on CH-OH group of donors;alcohol metabolic process;oxidoreductase activity, acting on CH-OH group of donors;FAD binding	GMC_OxRdtase_N; GMC_OxRtase_C; GMC_OxRdtase
GRMZM2G093270	0.473807	1.4992	-0.790368			LOC100278906 (pco101290), mRNA	LOC100278906	intracellular;zinc ion binding	DUF597; Znf_B-box
GRMZM2G101511	0.473494	1.48547	-2.05334	tga1	teosinte glume architecture1	NA	NA	DNA binding;nucleus;DNA binding;nucleus	Transcpt_factor_SBP-box
GRMZM2G041980	0.472891	0.690937	-0.971099			NOD26-like membrane intrinsic protein1 (nip1a), mRNA	NOD26-like membrane intrinsic protein1	transporter activity;transport;membrane;transporter activity;transport;membrane;integral to membrane;transmembrane transport;transporter activity;transport;membrane;integral to membrane;transmembrane transport;transporter activity;transport;membrane;transporter activity;transport;membrane;transporter activity;transport;membrane	MIP; MIP_CS
GRMZM2G059453	0.471362	0.862056	-2.21306			protein phosphatase 2C (LOC100282657), mRNA	protein phosphatase 2C	catalytic activity;protein serine/threonine phosphatase activity;protein amino acid dephosphorylation;protein serine/threonine phosphatase complex;homoiothermy;ice binding;response to freezing	PP2C_N; PP2C-related; Antifreeze_1; PP2C_Mn2_Asp60_BS
GRMZM2G109547	0.470701	1.23597	-1.12485			hypothetical protein LOC100384206 (LOC100384206), mRNA	NA	membrane	ABC_2_trans
GRMZM2G009223	0.464501	2.0085	-1.49256			glucose-6-phosphate/phosphate translocator 2 (LOC100281048), mRNA	glucose-6-phosphate/phosphate translocator 2	transporter activity;transport;membrane;integral to membrane;transmembrane transport	UAA; DMT; DUF250; Tpt_PEP_transl
GRMZM2G133311	0.453034	0.734254	-2.13658			hypothetical protein LOC100274098 (LOC100274098), mRNA	hypothetical protein LOC100274098	NA	DUF623
GRMZM2G108851	0.450931	0.413939	-1.17267			NA	NA	homoiothermy;ice binding;response to freezing;homoiothermy;ice binding;response to freezing	DOMON_rel; Cyt_b561/ferric_Rdtase_TM
GRMZM2G090177	0.450298	1.12685	-2.9506			hypothetical protein LOC100273265 (LOC100273265), mRNA	hypothetical protein LOC100273265	membrane;protein homooligomerization	C2_Ca-dep; C2_Ca/lipid-bd_dom_CaLB; Prion
GRMZM2G074543	0.44999	2.27401	-1.72258	yab9	yabby9	yabby9 protein (ZYB9), mRNA	yabby9 protein	NA	YABBY; HMG_superfamily
GRMZM5G893055	0.448565	1.1706	-1.73273			hypothetical protein LOC100382963 (LOC100382963), mRNA	hypothetical protein LOC100382963	ubiquitin ligase complex;ubiquitin-protein ligase activity;binding;protein ubiquitination	Ubox_domain; Armadillo; ARM-type_fold; Beta-catenin
GRMZM2G106702	0.448208	0.603766	-0.0866782			NA	NA	protein kinase activity;protein serine/threonine kinase activity;calcium ion binding;ATP binding;sugar binding;protein amino acid phosphorylation;recognition of pollen;protein kinase activity;protein serine/threonine kinase activity;ATP binding;protein amino acid phosphorylation	Ser-Thr/Tyr-Pkinase; Se/Thr_prot_kinase-like_dom; Kinase-like_dom; Tyr_Pkinase_cat_dom; Ser/Thr_prot_kinase_dom; Ser/Thr_prot_kinase_AS
GRMZM2G015844	0.437837	1.54114	-0.608802			hypothetical protein LOC100384677 (LOC100384677), mRNA	hypothetical protein LOC100384677	hydrogen ion transmembrane transporter activity;ATP synthesis coupled proton transport;proton-transporting V-type ATPase, V0 domain	ATPase_V0-cplx_csu
GRMZM2G128969	0.437786	0.413124	-0.387659			hypothetical protein LOC100275204 (LOC100275204), mRNA;hypothetical protein LOC100275204 (LOC100275204), mRNA	hypothetical protein LOC100275204;hypothetical protein LOC100275204	ion channel activity;voltage-gated chloride channel activity;chloride transport;membrane;transmembrane transport;ion channel activity;transmembrane transport;ion channel activity;voltage-gated chloride channel activity;chloride transport;membrane;transmembrane transport	Cl-channel_volt-gated; Cl-channel_core
GRMZM2G178199	0.436326	0.713397	-1.51269			hypothetical protein LOC100274585 (LOC100274585), mRNA	hypothetical protein LOC100274585	NA	Disease-R_pln
GRMZM2G143469	0.435505	1.67806	-0.567998			LOC100285714 (pco066337a), mRNA	LOC100285714	NA	NA
GRMZM2G397402	0.433675	0.774266	-0.815814			hypothetical protein LOC100192848 (LOC100192848), mRNA	hypothetical protein LOC100192848	monooxygenase activity;iron ion binding;electron carrier activity;heme binding;oxidation reduction;monooxygenase activity;iron ion binding;electron carrier activity;heme binding;oxidation reduction	Cyt_P450; Cyt_P450_E_grp-I
GRMZM2G003789	0.432755	1.6161	-0.748072			hypothetical protein LOC100383476 (LOC100383476), mRNA	hypothetical protein LOC100383476	protein binding;metabolic process;hydrolase activity	Peptidase_M20; Peptidase_M20_dimer; Pept_M20D_AA028/carboxypep-Ss1; Pept_M20D_amidohydro
GRMZM2G056986	0.432443	0.628192	-1.51809			hypothetical protein LOC100279596 (LOC100279596), mRNA	NA	DNA binding	Myb_DNA-bd; Homeodomain-like; SANT_DNA-bd; Myb-like+DNA-bd_dom_SHAQKYF
GRMZM2G024993	0.431767	1.73463	-0.919274	wx1	waxy1	waxy1 (wx1), mRNA	waxy1	starch synthase activity;biosynthetic process;glucan biosynthetic process;starch synthase activity;biosynthetic process;glucan biosynthetic process;starch synthase activity;biosynthetic process;glucan biosynthetic process;starch synthase activity;biosynthetic process;glucan biosynthetic process	Starch_synth_cat_dom; Glyco_trans_1; GlgA
GRMZM2G106185	0.429613	1.0303	-0.763232			myb-like DNA-binding domain, SHAQKYF class family protein (LOC100285002), mRNA	myb-like DNA-binding domain, SHAQKYF class family protein	NA	Myb_DNA-bd; Homeodomain-like; Myb-like+DNA-bd_dom_SHAQKYF
GRMZM2G179005	0.425703	0.73116	-0.506907			NA	Histone H3.2;Histone H3.2;Histone H3.2	nucleosome;DNA binding;nucleosome assembly;nucleosome;DNA binding;nucleosome assembly;nucleosome;DNA binding;nucleosome assembly	Histone_core_D; Histone-fold; Histone_H3
GRMZM2G031930	0.421338	0.566535	-0.196852			hypothetical protein LOC100193496 (LOC100193496), mRNA;FIP1 (LOC100284278), mRNA	hypothetical protein LOC100193496;FIP1	histamine receptor activity;G-protein coupled receptor protein signaling pathway;integral to membrane	NA
GRMZM2G589696	0.420971	0.94253	-1.59148			hypothetical protein LOC100193142 (LOC100193142), mRNA	hypothetical protein LOC100193142	DNA binding;zinc ion binding;regulation of transcription;DNA binding;zinc ion binding;regulation of transcription	Znf_Dof
GRMZM2G392975	0.420102	0.867856	-0.243523	pip1c	plasma membrane intrinsic protein1	plasma membrane integral protein ZmPIP1-3 (PIP1-4), mRNA;plasma membrane integral protein ZmPIP1-3 (PIP1-4), mRNA	plasma membrane integral protein ZmPIP1-3;plasma membrane integral protein ZmPIP1-3	transporter activity;transport;membrane;integral to membrane;transmembrane transport;transporter activity;transport;membrane;integral to membrane;transmembrane transport;transporter activity;transport;membrane;integral to membrane;transmembrane transport	MIP; MIP_CS; Aquaporin
GRMZM2G153184	0.413542	0.494679	-0.523926			LOC100284001 (gpm571), mRNA	LOC100284001	NA	Chloroa_b-bind
GRMZM2G160563	0.407151	0.717385	-1.50881			NA	NA	NA	Cyclin_related_2; Cyclin-like
GRMZM2G037472	0.406502	0.970792	-0.60934			NA	NA	microtubule motor activity;ATP binding;microtubule-based movement	Kinesin_motor_dom; Tropomyosin
GRMZM2G085941	0.402245	0	-3.23979			NA	NA	NA	MACPF; MAC_perforin
GRMZM2G164341	0.401903	2.20547	-1.61092			NA	NA	nucleus;cytoskeleton;cell-matrix adhesion;transcription regulator activity;homoiothermy;regulation of transcription;ice binding;response to freezing	HLH_DNA-bd_dom; HLH_DNA-bd; Antifreeze_1; Paxillin
GRMZM5G880268	0.40024	1.02211	-1.02974			hypothetical protein LOC100272994 (LOC100272994), mRNA	hypothetical protein LOC100272994	DNA binding;zinc ion binding;regulation of transcription	Znf_Dof; K_chnl_volt-dep_Kv1.4
GRMZM2G008691	0.399484	1.29497	-1.89784			LOC100193615 (IDP1980), mRNA	LOC100193615	nucleus;transcription regulator activity;regulation of transcription	HLH_DNA-bd_dom; HLH_DNA-bd
GRMZM2G035278	0.399181	0.946664	-0.775371			hypothetical protein LOC100273389 (LOC100273389), mRNA;hypothetical protein LOC100304047 (LOC100304047), mRNA	hypothetical protein LOC100273389;hypothetical protein LOC100304047	type I hypersensitivity	Polyketide_cyclase/dehydratase; POA_allergen_C
GRMZM2G165865	0.393243	1.42191	-1.38168			NA	NA	NA	HSP20-like_chaperone
GRMZM2G160064	0.38813	1.41917	-0.68761			metal ion binding protein (LOC100284782), mRNA	metal ion binding protein	metal ion transport;metal ion binding	HeavyMe_transpt
GRMZM2G150408	0.386369	0.42093	-0.565648			hypothetical protein LOC100277070 (LOC100277070), mRNA	hypothetical protein LOC100277070	NA	NA
GRMZM2G153887	0.386304	0.663918	-0.169204			hypothetical protein LOC100276051 (LOC100276051), mRNA	hypothetical protein LOC100276051	NA	NA
GRMZM5G827174	0.385895	0.933781	-2.60129			NA	NA	NA	DUF1005
GRMZM2G031827	0.383939	0.786716	-0.065043			splicing factor U2af 38 kDa subunit (LOC100282114), mRNA	splicing factor U2af 38 kDa subunit;splicing factor U2af 38 kDa subunit;splicing factor U2af 38 kDa subunit;splicing factor U2af 38 kDa subunit;splicing factor U2af 38 kDa subunit	nucleic acid binding;RNA binding;nucleus;zinc ion binding;nucleic acid binding;RNA binding;nucleus;zinc ion binding;nucleic acid binding;RNA binding;nucleus;zinc ion binding;nucleic acid binding;RNA binding;nucleus;zinc ion binding;nucleic acid binding;RNA binding;nucleus;zinc ion binding	Znf_CCCH; RRM_RNP1; RNA-recognition_dom1; U2_small
GRMZM2G168079	0.378766	1.72066	-1.89646			ABA response element binding factor (LOC100285149), mRNA	ABA response element binding factor	DNA binding;transcription factor activity;nucleus;regulation of transcription, DNA-dependent;sequence-specific DNA binding;protein dimerization activity	bZIP_1; bZIP_2; TF_bZIP; Tubby_N; Leuzip_Fos
GRMZM5G808853	0.378602	2.65626	-1.39781			hypothetical protein LOC100217312 (LOC100217312), mRNA	hypothetical protein LOC100217312	NA	NA
GRMZM2G039983	0.378518	1.06436	-0.628938			WDL1 (LOC100285787), mRNA	WDL1	homoiothermy;ice binding;response to freezing	Xklp2_targeting_prot
GRMZM2G307553	0.371958	0.641095	-0.168852			hypothetical protein LOC100384753 (LOC100384753), mRNA	hypothetical protein LOC100384753	NA	NA
GRMZM2G010545	0.371566	0.964215	-1.70923			NA	NA	NA	DUF_Cys-rich
AC210193.4_FG002	0.366142	1.75557	-3.21057			NA	hypothetical protein LOC100276953	NA	NA
GRMZM2G379005	0.365989	0.668316	-1.36599			hypothetical protein LOC100280196 (LOC100280196), mRNA	hypothetical protein LOC100280196;hypothetical protein LOC100280196;hypothetical protein LOC100280196	transcription factor activity;regulation of transcription, DNA-dependent;zinc ion binding;sequence-specific DNA binding;transcription factor activity;regulation of transcription, DNA-dependent;zinc ion binding;sequence-specific DNA binding;transcription factor activity;regulation of transcription, DNA-dependent;zinc ion binding;sequence-specific DNA binding;transcription factor activity;regulatio…	Znf_GATA
GRMZM2G025880	0.365854	3.37992	-3.00877			NA	NA	signal transducer activity;protein binding;response to light stimulus	NPH3; BTB/POZ_fold
GRMZM2G127134	0.363043	1.12981	-0.675489			hypothetical protein LOC100384800 (LOC100384800), mRNA	NA	transporter activity;oligopeptide transport;membrane	MFS_general_subst_transpt
GRMZM5G848603	0.361918	1.33611	-0.358118			hypothetical protein LOC100274448 (LOC100274448), mRNA	hypothetical protein LOC100274448	proteolysis;serine-type peptidase activity;proteolysis;serine-type peptidase activity	Peptidase_S28
GRMZM2G179777	0.357112	0.907337	-2.28881			triacylglycerol lipase (LOC100282659), mRNA	triacylglycerol lipase	NA	NA
GRMZM2G156255	0.35661	0.570992	-0.643686			NA	NA	voltage-gated potassium channel activity;potassium ion transport;membrane;ion channel activity;voltage-gated potassium channel activity;ion transport;potassium ion transport;membrane;transmembrane transport	Ion_trans; Ion_trans_2; cNMP-bd-like; K_chnl_volt-dep_EAG/ELK/ERG
GRMZM2G332548	0.355667	0.602297	-0.23755			xyloglucan galactosyltransferase KATAMARI 1 (LOC100281090), mRNA	xyloglucan galactosyltransferase KATAMARI 1	membrane	Exostosin; FH2_actin-bd
GRMZM2G099642	0.353087	0.698058	-1.52315			hypothetical protein LOC100384694 (LOC100384694), mRNA	NA	zinc ion binding;oxidoreductase activity;oxidation reduction	ADH_C; GroES-like
GRMZM2G173192	0.352712	1.03398	-0.718081			hypothetical protein LOC100193279 (LOC100193279), mRNA	hypothetical protein LOC100193279	catalytic activity;glycerol-3-phosphate dehydrogenase (NAD+) activity;L-lactate dehydrogenase activity;malic enzyme activity;cytoplasm;carbohydrate metabolic process;glycerol-3-phosphate metabolic process;glycolysis;malate metabolic process;glycerol-3-phosphate dehydrogenase complex;oxidoreductase activity;oxidoreductase activity, acting on the CH-OH group of donors, NAD or NADP as acceptor;cellu…	L-lactate/malate_DH; Lactate/malate_DH_N; Lactate/malate_DH_C; Lactate_DH/Glyco_Ohase_4_C; Malic_OxRdtase; NAD-dep_Gly3P_DH; L-lactate_DH_AS; L-lactate_DH
GRMZM2G080274	0.350305	0.71956	-0.00998896			histone one (H1) 101 (hon101), mRNA;histone one (H1) 101 (hon101), mRNA	histone one (H1) 101;histone one (H1) 101	nucleosome;DNA binding;nucleus;nucleosome assembly;homoiothermy;ice binding;response to freezing;nucleosome;DNA binding;nucleus;nucleosome assembly;homoiothermy;ice binding;response to freezing;nucleosome;DNA binding;nucleus;nucleosome assembly;homoiothermy;ice binding;response to freezing	Histone_H1/H5; Histone_H5; Antifreeze_1
GRMZM2G444801	0.341775	1.0334	-1.36608			sulfate transporter 3.4 (LOC100281787), mRNA	sulfate transporter 3.4	transporter activity;transport;secondary active sulfate transmembrane transporter activity;sulfate transport;membrane;integral to membrane;transmembrane transport	Sulph_transpt; SO4_transptr/STAS; S04_transporter_CS; SulP_transpt
GRMZM2G109527	0.340777	0.739028	-1.79477			NA	NA	nucleotide binding;ATP binding;ATPase activity;nucleoside-triphosphatase activity;phosphopantetheine binding	ABC_transporter-like; ATPase_AAA+_core; PPantetheine_attach_site
GRMZM2G454399	0.336022	1.21568	-1.37473			NA	NA	NA	NA
GRMZM2G101270	0.330465	0.56993	-0.877609			NA	NA	nucleotide binding;DNA-directed DNA polymerase activity;ATP binding;DNA replication;DNA polymerase III complex;nucleoside-triphosphatase activity	ATPase_AAA+_core; Chaprnin_clpA/B; DNA_pol_III_sug/sutau
GRMZM2G430995	0.329755	0.608895	-0.271133			xyloglucan galactosyltransferase KATAMARI 1 (LOC100281090), mRNA	xyloglucan galactosyltransferase KATAMARI 1	membrane	Exostosin; FH2_actin-bd
GRMZM2G046316	0.323887	2.56571	-2.40339			NA	NA	protein kinase activity;protein serine/threonine kinase activity;ATP binding;protein amino acid phosphorylation	Leu-rich_rpt_typical-subtyp
GRMZM2G150729	0.316334	2.30117	-1.61806			hypothetical protein LOC100272342 (LOC100272342), mRNA	hypothetical protein LOC100272342	nucleus;transcription regulator activity;regulation of transcription;nucleus;transcription regulator activity;regulation of transcription	NA
GRMZM2G165530	0.312068	1.56207	-0.215467			hypothetical protein LOC100277128 (LOC100277128), mRNA	hypothetical protein LOC100277128	tetracycline:hydrogen antiporter activity;tetracycline transport;integral to membrane;response to antibiotic;transmembrane transport;tetracycline:hydrogen antiporter activity;tetracycline transport;integral to membrane;response to antibiotic;transmembrane transport	MFS_1; MFS_general_subst_transpt; Tet-R_TetA
GRMZM5G875038	0.308662	1.57058	-0.156631			hypothetical protein LOC100384554 (LOC100384554), mRNA	hypothetical protein LOC100384554	NA	NA
GRMZM2G066369	0.304034	1.87683	-4.21248			glutathione S-transferase GST 38 (LOC541847), mRNA	glutathione S-transferase GST 38	NA	Glutathione_S-Trfase_N; GST_C; Glutathione-S-Trfase_C-like; Thioredoxin-like_fold
GRMZM2G013430	0.30346	1.16359	-3.56874			serine acetyltransferase2 (sat2), mRNA	serine acetyltransferase2	cytoplasm;cysteine biosynthetic process from serine;serine O-acetyltransferase activity;transferase activity;homoiothermy;ice binding;response to freezing	Ser_AcTrfase_N; Hexapep_transf; Trimer_LpxA-like; Hexapep_transf_CS; Antifreeze_1; Ser_O-AcTrfase
GRMZM2G170982	0.299194	1.44218	-3.21631			NA	NA	nucleotide binding;ATP binding;nucleoside-triphosphatase activity	ATPase_AAA_core; ATPase_AAA+_core
GRMZM2G051005	0.299012	1.33247	-3.11296			hypothetical protein LOC100382972 (LOC100382972), mRNA	hypothetical protein LOC100382972	transferase activity, transferring acyl groups other than amino-acyl groups	Transferase
GRMZM2G438606	0.298176	1.85888	-3.0612			hypothetical protein LOC100280045 (LOC100280045), mRNA	hypothetical protein LOC100280045	NA	NA
GRMZM2G317262	0.294169	0.53436	-1.56771			NA	NA	NA	F-box_dom_cyclin-like; F-box_dom_Skp2-like
GRMZM2G094543	0.288196	1.5062	-1.42013			hypothetical protein LOC100274993 (LOC100274993), mRNA	hypothetical protein LOC100274993	homoiothermy;ice binding;response to freezing	Antifreeze_1
GRMZM2G116584	0.285615	1.29112	-0.201227			hypothetical protein LOC100193926 (LOC100193926), mRNA	hypothetical protein LOC100193926	calcium ion binding;calcium ion binding;calcium ion binding;calcium ion binding;calcium ion binding;calcium ion binding;C3a anaphylatoxin receptor activity;chemotaxis;G-protein coupled receptor protein signaling pathway;integral to membrane	NA
GRMZM2G533389	0.28529	1.8918	-0.0618815			NA	NA	NA	Acyl_CoA_acyltransferase
GRMZM2G062471	0.283347	0.588776	-2.21987			secretory protein-like (LOC100281835), mRNA	secretory protein-like;secretory protein-like	NA	DUF26
GRMZM2G088356	0.282711	0.775923	-0.684416			LOC100279792 (gpm851), mRNA	LOC100279792	membrane	TMS_TDE
GRMZM2G442546	0.27386	0.453743	-1.80391			hypothetical protein LOC100383620 (LOC100383620), mRNA	hypothetical protein LOC100383620	transporter activity;transport;membrane;integral to membrane;substrate-specific transmembrane transporter activity;transmembrane transport	MFS_1; Sub_transporter; MFS_general_subst_transpt; Sugar/inositol_transpt; Sugar_transporter_CS
AC208897.3_FG003	0.271459	0.660941	-0.559935			hypothetical protein LOC100383408 (LOC100383408), mRNA	hypothetical protein LOC100383408	NA	NA
GRMZM2G325786	0.26947	1.58224	-1.13369			NA	NA	protein serine/threonine kinase activity;ATP binding;protein amino acid phosphorylation;protein serine/threonine kinase activity;dopamine receptor activity;ATP binding;protein amino acid phosphorylation;G-protein coupled receptor protein signaling pathway;integral to membrane	Kinase-like_dom; Ser/Thr_prot_kinase_dom; Dopa_D4_rcpt
GRMZM2G173372	0.267703	0.966845	-2.35471			DNA binding protein (LOC100283423), mRNA;hypothetical protein LOC100381478 (LOC100381478), mRNA	DNA binding protein;hypothetical protein LOC100381478	nucleus;transcription regulator activity;regulation of transcription;nucleus;transcription regulator activity;regulation of transcription	HLH_DNA-bd_dom; HLH_DNA-bd
GRMZM2G453565	0.266956	0.861849	-1.36715			NA	NA	catalytic activity;hydrolase activity, hydrolyzing O-glycosyl compounds;extracellular region;carbohydrate metabolic process;carbohydrate binding	Glyco_hydro_9; CBM_49; 6-hairpin_glycosidase-like; Carb-bd; Glyco_hydro_9_AS
GRMZM2G118250	0.254941	1.25423	-0.563536	ig1	indeterminate gametophyte1	ASYMMETRIC LEAVES2 (LBD6), mRNA	ASYMMETRIC LEAVES2;ASYMMETRIC LEAVES2;ASYMMETRIC LEAVES2;ASYMMETRIC LEAVES2	NA	LOB
GRMZM2G007134	0.254305	2.69481	-3.38465			NA	NA	NA	NA
GRMZM2G016477	0.254221	0.41194	-0.509788			NA	NA	protein kinase activity;protein serine/threonine kinase activity;protein binding;ATP binding;protein amino acid phosphorylation;homoiothermy;ice binding;response to freezing	LRR-contain_N2; Leu-rich_rpt; Ser-Thr/Tyr-Pkinase; Kinase-like_dom; Leu-rich_rpt_typical-subtyp; Tyr_Pkinase_cat_dom; Ser/Thr_prot_kinase_dom; Ser/Thr_prot_kinase_AS; Antifreeze_1
GRMZM2G042407	0.240531	1.10975	-2.26192			NA	NA	NA	DUF702; Znf_LRP1; LRP1_C
GRMZM2G134260	0.234487	1.20159	-2.36643			NA	NA	DNA binding;transcription factor activity;nucleus;regulation of transcription, DNA-dependent;transcription regulator activity;sequence-specific DNA binding;DNA binding;transcription factor activity;nucleus;regulation of transcription, DNA-dependent;transcription regulator activity;sequence-specific DNA binding	Homeobox; Leu_zip_homeo; Homeodomain-like; HTH_lambrepressr; Homeobox_region; Homeobox_CS
GRMZM2G412503	0.229535	1.11315	-0.446577			NA	NA	nucleosome;DNA binding;nucleus;nucleosome assembly	Histone-fold; Histone_H4
GRMZM2G359924	0.228478	1.38457	-2.07656			hypothetical protein LOC100279375 (LOC100279375), mRNA	hypothetical protein LOC100279375	nucleus;regulation of transcription;nucleus;regulation of transcription;nucleus;regulation of transcription	AUX_IAA
GRMZM5G801292	0.225831	0.615826	-1.27585			NA	NA	NA	NA
GRMZM2G478892	0.224945	1.28106	-2.1396			NA	NA	hydrolase activity, hydrolyzing O-glycosyl compounds;carbohydrate metabolic process;hydrolase activity, hydrolyzing O-glycosyl compounds;carbohydrate metabolic process	Glyco_hydro_17; Glyco_hydro_catalytic_core
GRMZM2G025459	0.221597	0.921694	-0.108257			SNF1-related protein kinase regulatory subunit beta-1 (LOC100285804), mRNA	SNF1-related protein kinase regulatory subunit beta-1	NA	AMP_prot_kin_bsu_interact-dom
GRMZM2G139565	0.218561	1.34188	-1.30524			hypothetical protein LOC100277664 (LOC100277664), mRNA	hypothetical protein LOC100277664	NA	NA
GRMZM2G066516	0.214657	0.754962	-1.2084			hypothetical protein LOC100384830 (LOC100384830), mRNA	NA	NA	DUF547
GRMZM5G879116	0.213919	0.662181	-1.42964			hypothetical protein LOC100279446 (LOC100279446), mRNA	hypothetical protein LOC100279446	NA	CRAL-bd_TRIO_C
GRMZM2G059314	0.205465	2.6325	-0.767684			LOC100279403 (cl25115_1), mRNA	LOC100279403	oxidoreductase activity;oxidation reduction;oxidoreductase activity;oxidation reduction;oxidoreductase activity;oxidation reduction;oxidoreductase activity;oxidation reduction;oxidoreductase activity;oxidation reduction;oxidoreductase activity;oxidation reduction;oxidoreductase activity;oxidation reduction	Aldo/ket_red; Aldo/ket_reductase_CS; Aldo/keto_reductase_sg
GRMZM2G122280	0.20232	0.540662	-2.54837			NA	NA	iron ion binding;oxidoreductase activity;oxidation reduction;iron ion binding;oxidoreductase activity;oxidation reduction;iron ion binding;oxidoreductase activity;oxidation reduction	Oxoglutarate/Fe-dep_oxygenase; Isopenicillin-N_synthase
GRMZM2G377131	0.201659	1.0208	-2.31857			hypothetical protein LOC100277055 (LOC100277055), mRNA;hypothetical protein LOC100304054 (LOC100304054), mRNA	hypothetical protein LOC100277055;hypothetical protein LOC100304054;hypothetical protein LOC100277055;hypothetical protein LOC100304054	NA	NA
GRMZM2G138683	0.200247	1.22208	-0.634943			hypothetical protein LOC100381682 (LOC100381682), mRNA	hypothetical protein LOC100381682	transcription factor activity;sequence-specific DNA binding;regulation of transcription	WRKY_DNA-bd
GRMZM2G021339	0.192121	1.62703	-1.6695			hypothetical protein LOC100383369 (LOC100383369), mRNA	hypothetical protein LOC100383369	DNA binding;transcription factor activity;nucleus;regulation of transcription, DNA-dependent;transcription regulator activity;sequence-specific DNA binding;DNA binding;transcription factor activity;nucleus;regulation of transcription, DNA-dependent;transcription regulator activity;sequence-specific DNA binding;DNA binding;transcription factor activity;nucleus;regulation of transcription, DNA-depe…	Homeobox; Leu_zip_homeo; Homeodomain-like; HTH_lambrepressr; Homeobox_region; Homeobox_CS
GRMZM2G123407	0.191793	4.13113	-2.16895			NA	NA	copper ion binding;electron carrier activity	Plcyanin-like; Cupredoxin
GRMZM2G089361	0.190597	0.977718	-2.48211			NA	NA	NA	Transcription_factor_TCP
GRMZM2G366688	0.188912	0.596446	-0.631713			LOC100272978 (cl40696_1), mRNA;LOC100272978 (cl40696_1), mRNA	LOC100272978;LOC100272978	NA	NA
GRMZM2G008834	0.179486	1.15907	-2.15156			hypothetical protein LOC100280395 (LOC100280395), mRNA	hypothetical protein LOC100280395	protein binding	Kelch_1; Kelch_2; Gal_Oxase/kelch_b-propeller
GRMZM5G865298	0.177534	2.4905	-0.116429			NA	NA	transporter activity;oligopeptide transport;membrane	Oligopeptide_transporter; MFS_general_subst_transpt
GRMZM2G529859	0.172331	0.762567	-0.0907848	yab15	yabby15	NA	NA	NA	YABBY; HMG_superfamily
GRMZM2G170322	0.170464	1.75886	-1.40064			hypothetical protein LOC100273616 (LOC100273616), mRNA	hypothetical protein LOC100273616	DNA binding;DNA binding;DNA binding	Myb_DNA-bd; Homeodomain-like; SANT_DNA-bd; Myb-like+DNA-bd_dom_SHAQKYF
GRMZM2G135362	0.167116	1.62279	-2.72142			NA	NA	cysteine-type endopeptidase activity;structural molecule activity;proteolysis	Major_sperm; Ankyrin_rpt; Ankyrin_rpt-contain_dom; PapD-like; Pept_cys_AS
GRMZM2G055968	0.163238	0.355095	-0.631588			hypothetical protein LOC100273820 (LOC100273820), mRNA	hypothetical protein LOC100273820	NA	F-box_dom_Skp2-like
GRMZM2G329353	0.160673	1.99356	-1.79599			NA	NA	NA	F-box_dom_cyclin-like; F-box_dom_Skp2-like
GRMZM2G077181	0.160149	3.0174	-1.37193			NA	NA	transcription factor activity;regulation of transcription, DNA-dependent;sequence-specific DNA binding;transcription factor activity;regulation of transcription, DNA-dependent;sequence-specific DNA binding	Raffinose_synthase; Glyco_hydro_catalytic_core; TF_bZIP
GRMZM2G141819	0.156883	1.64245	-1.7963			hypothetical protein LOC100273834 (LOC100273834), mRNA	hypothetical protein LOC100273834	NA	NA
GRMZM2G056513	0.15652	1.36583	-0.46882			hypothetical protein LOC100275283 (LOC100275283), mRNA;hypothetical protein LOC100384213 (LOC100384213), mRNA	hypothetical protein LOC100275283	NA	NA
GRMZM2G147966	0.15407	0.67288	-1.36053			NA	NA	peroxidase activity;iron ion binding;calcium ion binding;electron carrier activity;integral to membrane;oxidoreductase activity;FAD binding;oxidoreductase activity, acting on NADH or NADPH, with oxygen as acceptor;oxidation reduction	NADPH_Ox; Flavoprotein_TM; EF_hand_Ca-bd
GRMZM2G030762	0.152775	0.898511	-0.791571			NA	NA	metallocarboxypeptidase activity;nucleus;proteolysis;zinc ion binding;transcription regulator activity;regulation of transcription;nucleus;transcription regulator activity;regulation of transcription;nucleus;transcription regulator activity;regulation of transcription	HLH_DNA-bd
GRMZM2G171400	0.150953	0.350126	-0.136355			ribokinase (LOC100282026), mRNA	ribokinase	NA	Carb/pur_kinase; Carboh/pur_kinase_PfkB_CS
GRMZM2G132568	0.147082	0.761905	-0.264257			LOC100191683 (pco086679), mRNA	LOC100191683	tetracycline:hydrogen antiporter activity;tetracycline transport;integral to membrane;response to antibiotic	Inhibitor_apoptosis_Bax1; Tet-R_TetA
GRMZM2G301803	0.145709	0.612412	-0.178951			hypothetical protein LOC100192849 (LOC100192849), mRNA	hypothetical protein LOC100192849;hypothetical protein LOC100192849;hypothetical protein LOC100192849	signal transducer activity;protein binding;response to light stimulus;signal transducer activity;protein binding;response to light stimulus;signal transducer activity;protein binding;response to light stimulus	NPH3; BTB/POZ_fold; BTB/POZ-like
GRMZM2G087146	0.139129	1.37483	-0.650195			LOC100192922 (si605019d10), mRNA	LOC100192922;LOC100192922	NA	Aminoglycoside_PTrfase; Choline/ethanolamine_kinase; Kinase-like_dom
GRMZM2G035708	0.139096	3.12839	-1.46676			LOC100217145 (cl61634_1), mRNA	LOC100217145;LOC100217145	protein folding;protein folding;protein folding;protein folding	PPIase_FKBP
GRMZM2G167318	0.138517	0.479901	-0.244821			NA	NA	NA	NA
GRMZM2G175562	0.128675	0.927621	-1.29331			hypothetical protein LOC100272890 (LOC100272890), mRNA	hypothetical protein LOC100272890;hypothetical protein LOC100272890	calcium ion binding;oxygen evolving complex;photosynthesis;extrinsic to membrane;photosystem II stabilization;calcium ion binding;oxygen evolving complex;photosynthesis;extrinsic to membrane;photosystem II stabilization	PSII_MSP
GRMZM2G131516	0.127614	0.563425	-1.53972			protein SCARECROW (SCR), mRNA	protein SCARECROW	structural constituent of ribosome;intracellular;ribosome;translation;pathogenesis;homoiothermy;ice binding;response to freezing	TF_GRAS; Antifreeze_1; BacInvasinC; Ribosomal_P2
GRMZM2G069325	0.125913	1.26522	-2.73103			hypothetical protein LOC100272412 (LOC100272412), mRNA;hypothetical protein LOC100382726 (LOC100382726), mRNA	hypothetical protein LOC100272412	DNA binding	NA
GRMZM5G858249	0.120085	0.642926	-1.95422			hypothetical protein LOC100273173 (LOC100273173), mRNA	hypothetical protein LOC100273173	hydrolase activity, hydrolyzing O-glycosyl compounds;carbohydrate metabolic process	Glyco_hydro_17; X8; Glyco_hydro_catalytic_core
GRMZM2G351318	0.119758	1.75612	-2.69238			hypothetical protein LOC100276169 (LOC100276169), mRNA	hypothetical protein LOC100276169	NA	DUF584
AC229978.2_FG002	0.11218	1.07717	-1.49773			NA	NA	DNA binding;ligand-dependent nuclear receptor activity;nucleus;regulation of transcription, DNA-dependent;homoiothermy;ice binding;response to freezing	Antifreeze_1; NOR1_rcpt
GRMZM2G019686	0.109243	2.16917	-2.37385			LOC100284002 (cl18204_1), mRNA	LOC100284002	NA	NA
GRMZM2G435357	0.0991847	1.70092	-0.873739			NA	NA	voltage-gated potassium channel activity;intracellular;potassium ion transport;zinc ion binding;integral to membrane	Znf_C2H2; Znf_C2H2-like; K_chnl_volt-dep_Kv3.3
GRMZM2G126397	0.0990482	0.699924	-0.952485			nonspecific lipid-transfer protein (LOC100280743), mRNA	nonspecific lipid-transfer protein	lipid transport;lipid binding	LTP/seed_store/tryp_amyl_inhib; Bifunc_inhib/LTP/seed_store; Plant_LTP
GRMZM2G330049	0.0978481	0.778591	-0.629666			CIPK-like protein 1 (LOC100285849), mRNA	CIPK-like protein 1	structural constituent of ribosome;protein kinase activity;protein serine/threonine kinase activity;ATP binding;intracellular;ribosome;translation;protein amino acid phosphorylation;signal transduction	Se/Thr_prot_kinase-like_dom; Ser-Thr/Tyr-Pkinase; NAF_dom; Kinase-like_dom; Tyr_Pkinase_cat_dom; Ser/Thr_prot_kinase_dom; Protein_kinase_ATP_BS; Ser/Thr_prot_kinase_AS; Ribosomal_S14_CS
GRMZM2G093305	0.0965138	1.08554	-1.63485			hypothetical protein LOC100194357 (LOC100194357), mRNA	hypothetical protein LOC100194357	intracellular;zinc ion binding;intracellular;zinc ion binding	Znf_C2H2; Znf_C2H2-like
GRMZM2G047759	0.093569	2.10399	-2.47115			NA	NA	NA	NA
GRMZM2G125850	0.0888134	2.60217	-0.0568029			LOC100279907 (gpm334), mRNA	LOC100279907	transporter activity;transport;membrane;integral to membrane;homoiothermy;ice binding;response to freezing;transmembrane transport	UAA; DMT; DUF250; Antifreeze_1; Tpt_PEP_transl
GRMZM5G852704	0.0839606	1.26857	-1.87754			NA	NA	DNA binding;transcription factor activity;regulation of transcription, DNA-dependent	TF_ERF_DNA-bd; DNA-bd_integrase-typ
GRMZM2G164428	0.0821148	0.701724	-1.43887			NA	NA	cytoskeleton;cell-matrix adhesion	DUF623; Paxillin
GRMZM2G009188	0.0820429	0.806031	-1.62165			NA	NA	metabolic process;2,3-dihydro-2,3-dihydroxybenzoate dehydrogenase activity;enterobactin biosynthetic process;oxidoreductase activity;oxidation reduction;metabolic process;2,3-dihydro-2,3-dihydroxybenzoate dehydrogenase activity;enterobactin biosynthetic process;oxidoreductase activity;oxidation reduction	DH_sc/Rdtase_SDR; PKS_KR; Sc_DH/Rdtase_CS; Glc/ribitol_DH; DHB_DH
GRMZM2G074238	0.0728244	1.53459	-0.01683			hypothetical protein LOC100280362 (LOC100280362), mRNA	hypothetical protein LOC100280362	NA	AB_hydrolase_1
GRMZM2G383404	0.071184	1.25296	-0.443013			anthocyanidin 3-O-glucosyltransferase (LOC100282556), mRNA	anthocyanidin 3-O-glucosyltransferase	metabolic process;transferase activity, transferring hexosyl groups	UDP_glucos_trans
GRMZM2G169516	0.0700549	0.857315	-0.45649			hypothetical protein LOC100274566 (LOC100274566), mRNA	hypothetical protein LOC100274566	catalytic activity;indole-3-glycerol-phosphate synthase activity;tryptophan metabolic process;metabolic process;catalytic activity;indole-3-glycerol-phosphate synthase activity;tryptophan metabolic process;metabolic process;catalytic activity;indole-3-glycerol-phosphate synthase activity;tryptophan metabolic process;metabolic process;catalytic activity;indole-3-glycerol-phosphate synthase activit…	Indole-3-glycerol_P_synth; RibuloseP-bd_barrel; Indole-3-GlycerolPSynthase_CS
GRMZM2G075436	0.0677912	1.0836	-1.69488			NA	NA	hydrolase activity, hydrolyzing O-glycosyl compounds;extracellular region;carbohydrate metabolic process;membrane;cellulose binding	Exostosin; Cellulose-bd_dom_fun
GRMZM2G156585	0.0655898	0.553466	-1.99812			NA	NA	catalytic activity;metabolic process;pyridoxal phosphate binding	PyrdxlP-dep_enz_bsu
GRMZM5G873964	0.0544805	0.92205	-1.7583			NA	NA	NA	K_chnl_volt-dep_Kv1.4
GRMZM2G144173	0.0483313	2.9533	-0.149396			NA	NA	NA	NA
GRMZM2G118047	0.0474143	1.57999	-1.26184			hypothetical protein LOC100279662 (LOC100279662), mRNA	NA	transcription factor activity;nucleus;regulation of transcription, DNA-dependent;sequence-specific DNA binding;transcription factor activity;nucleus;regulation of transcription, DNA-dependent;sequence-specific DNA binding	HSF_DNA-bd
GRMZM2G020742	0.0462128	1.47108	-0.515597			NA	NA	homoiothermy;ice binding;response to freezing	Glyco_trans_2
GRMZM2G162295	0.0445987	1.21178	-1.99612			hypothetical protein LOC100192995 (LOC100192995), mRNA	hypothetical protein LOC100192995;hypothetical protein LOC100192995;hypothetical protein LOC100192995	integral to membrane;integral to membrane;integral to membrane	Tetraspanin; Tetraspanin_sub
GRMZM2G409128	0.0439872	0.644624	-1.15899			hypothetical protein LOC100275580 (LOC100275580), mRNA	hypothetical protein LOC100275580	metabolic process;methyltransferase activity	NA
GRMZM2G120304	0.0410896	1.23605	-1.13885			hypothetical protein LOC100274292 (LOC100274292), mRNA	hypothetical protein LOC100274292;hypothetical protein LOC100274292	NA	AnnexinVII
GRMZM2G092823	0.0360041	1.01419	-1.66378			cytochrome P450 CYP78A53 (CYP78A53), mRNA	cytochrome P450 CYP78A53	monooxygenase activity;iron ion binding;electron carrier activity;heme binding;oxidation reduction	Cyt_P450; Cyt_P450_CS; Cyt_P450_E_grp-I
GRMZM2G038497	0.0258824	1.62538	-1.13858			hypothetical protein LOC100276644 (LOC100276644), mRNA	NA	NA	NA
GRMZM2G014826	0.0141062	0.482633	-1.63216			LOC100191693 (umc2407), mRNA;hypothetical protein LOC100193285 (LOC100193285), mRNA	LOC100191693	integral to membrane	Tetraspanin; Tetraspanin_sub
GRMZM2G132367	0.00622819	0.945894	-2.14296			homeodomain-leucine zipper transcription factor TaHDZipI-1 (LOC100283435), mRNA	homeodomain-leucine zipper transcription factor TaHDZipI-1;homeodomain-leucine zipper transcription factor TaHDZipI-1	DNA binding;transcription factor activity;nucleus;regulation of transcription, DNA-dependent;transcription regulator activity;sequence-specific DNA binding;DNA binding;transcription factor activity;nucleus;regulation of transcription, DNA-dependent;transcription regulator activity;sequence-specific DNA binding	Homeobox; Leu_zip_homeo; Homeodomain-like; HTH_lambrepressr; Homeobox_region; Homeobox_CS
GRMZM5G872141	1.79769e+308	1.79769e+308	-0.141374			MTN3 (LOC100283122), mRNA	MTN3	membrane	NA
GRMZM2G317270	1.79769e+308	1.79769e+308	-1.79769e+308			NA	NA	catalytic activity;calcium-transporting ATPase activity;ATP binding;ATP biosynthetic process;cation transport;calcium ion transport;metabolic process;calcium ion transmembrane transporter activity;ATPase activity, coupled to transmembrane movement of ions, phosphorylative mechanism;membrane;hydrolase activity, acting on acid anhydrides, catalyzing transmembrane movement of substances	ATPase_P-typ_cation-transptr_N; ATPase_P-typ_ATPase-assoc-dom; Dehalogen-like_hydro; ATPase_P-typ_cation-transptr_C; ATPase_P-typ_ion-transptr; ATPase_P-typ_H-transp; ATPase_P-typ_cation-exchng_asu; ATPase_P-typ_P_site; ATPase_P-typ_Ca-transp_PMCA
AC194298.3_FG005	1.79769e+308	1.79769e+308	-3.38799			NA	NA	homoiothermy;ice binding;response to freezing	Antifreeze_1
GRMZM2G131836	1.79769e+308	1.79769e+308	-1.79769e+308			cinnamoyl CoA reductase2 (cncr2), mRNA	cinnamoyl CoA reductase2;cinnamoyl CoA reductase2	catalytic activity;3-beta-hydroxy-delta5-steroid dehydrogenase activity;steroid biosynthetic process;metabolic process;biosynthetic process;oxidoreductase activity;cellular metabolic process;coenzyme binding;catalytic activity;3-beta-hydroxy-delta5-steroid dehydrogenase activity;steroid biosynthetic process;metabolic process;biosynthetic process;oxidoreductase activity;cellular metabolic process;…	DH_sc/Rdtase_SDR; Epimerase_deHydtase; NmrA; Polysac_CapD-like; 3Beta_OHSteriod_DH/Estase; Male_sterile_NAD-bd
GRMZM2G167673	1.79769e+308	1.79769e+308	-1.79769e+308			NA	NA	monooxygenase activity;iron ion binding;electron carrier activity;heme binding;oxidation reduction	Cyt_P450; Cyt_P450_CS; Cyt_P450_E_grp-I; Cyt_P450_E_grp-IV; Cyt_P450_E_grp-II
GRMZM2G168371	1.79769e+308	4.74184	-1.79769e+308			hypothetical protein LOC100276429 (LOC100276429), mRNA	hypothetical protein LOC100276429;hypothetical protein LOC100276429	NA	DUF640
GRMZM2G061910	1.79769e+308	4.48914	-2.57039			hypothetical protein LOC100192081 (LOC100192081), mRNA	hypothetical protein LOC100192081	response to desiccation	WHy-dom
GRMZM2G113888	1.79769e+308	3.70737	-1.0616			hypothetical protein LOC100272799 (LOC100272799), mRNA	hypothetical protein LOC100272799	NA	Transcription_factor_TCP
GRMZM2G363116	1.79769e+308	3.70015	-1.65511			NA	NA	metabolic process;hydrolase activity	AB_hydrolase_3
GRMZM2G084397	1.79769e+308	3.33197	-2.06453			NA	NA	signal transducer activity;response to light stimulus;signal transducer activity;protein binding;response to light stimulus;signal transducer activity;response to light stimulus	NPH3
GRMZM2G392106	1.79769e+308	2.98654	-4.64604			NA	NA	homoiothermy;ice binding;response to freezing	DUF1635; Antifreeze_1
GRMZM2G150594	1.79769e+308	2.95826	-4.80054			hypothetical protein LOC100193815 (LOC100193815), mRNA	hypothetical protein LOC100193815	dopamine receptor activity;proteinaceous extracellular matrix;G-protein coupled receptor protein signaling pathway;multicellular organismal development;integral to membrane	NA
GRMZM2G095655	1.79769e+308	2.8451	-0.217376			hypothetical protein LOC100276920 (LOC100276920), mRNA	hypothetical protein LOC100276920	response to stress	UspA; Universal_stress_UspA
GRMZM2G144610	1.79769e+308	2.5342	-3.011			endosperm specific protein (LOC542362), mRNA;hypothetical protein LOC100193093 (LOC100193093), mRNA	hypothetical protein LOC100193093	NA	FAS1_domain; Apop_reg_Bcl2
GRMZM2G020156	1.79769e+308	1.59033	-1.96971			protein binding protein (LOC100281621), mRNA	protein binding protein	signal transducer activity;protein binding;response to light stimulus	NPH3; BTB/POZ_fold
GRMZM2G137736	1.79769e+308	1.57961	-1.8854			hypothetical protein LOC100275992 (LOC100275992), mRNA	hypothetical protein LOC100275992	intracellular;zinc ion binding	Znf_C2H2; Znf_C2H2-like
GRMZM2G166665	1.79769e+308	0.945721	-5.04718			lipopolysaccharide-modifying protein (LOC100285208), mRNA	lipopolysaccharide-modifying protein	NA	LipoPS_modifying
GRMZM2G323475	1.79769e+308	0.383786	-0.650315			NA	NA	NA	NA
