# Supplementary material for: Regulatory modules controlling maize inflorescence architecture
Source: HighWire-hosted journal article supplement (doi:10.1101/gr.166397.113), 2013-12-04
Supplement: Supp_Table15.xlsx [file Supp_Table15.xlsx]

## Sheet: Table_S15
Supplemental Table 15. Bound and modulated RA1 target gene grouped by co-expression cluster.
aCo-expression cluster assignment. bFunctional annotations, if available, based on xref pipeline includes Refseq DNA, Unigene, Entrez Gene, Gene Ontology and InterPro. Annotations in brackets are based on Arabidopsis orthologs. cGene ids for closest Arabidopsis ortholog(s) are provided based on EnsemblCompara gene trees at Gramene. NA means close otholog is not found. dYes or no is indicated if g…
Activated targets (bound and down-regulated in ramosa1 mutants)
				1mm		2mm
clustera	maize.gene.id	annotationb	arabidopsis.gene.id(s)c	DEd	ln fce	DE	ln fc	ear	tassel
1	GRMZM2G125557	[Dormancy/auxin associated family protein]	AT1G54070	yes	-0.845304	no	-0.342338		✓
2	GRMZM2G053939		NA	no	-0.406515	yes	-1.08906	✓
2	GRMZM5G889321		NA	yes	-0.67752	no	0.883815	✓	✓
3	GRMZM2G149905		NA	yes	-1.42848	no	-0.717358		✓
3	GRMZM2G163494	[high affinity nitrate transporter (NAR2.2)]	AT5G50200	no	-0.385059	yes	-2.80903	✓
4	AC233914.1_FG001		AT4G33480	no	-0.479863	yes	-2.04574		✓
4	GRMZM2G011110	DREB-like AP2-EREBP family TF	AT1G21910;AT1G44830;AT1G77640	no	-0.504125	yes	-2.41764	✓	✓
4	GRMZM2G029756	triglyceride lipase	AT1G06800;AT1G51440;AT2G30550	yes	-0.897762	yes	-1.12491	✓
4	GRMZM2G036340	dwarf1 (d1); gibberellin 3-oxidase	AT1G15550;AT1G80330;AT1G80340;AT4G21690	yes	-1.1057	yes	-1.86869		✓
4	GRMZM2G103270	[XB3 ortholog 1 (XBAT31)]	AT2G28840	yes	-0.66489	yes	-1.25216	✓
4	GRMZM2G147279	proline-rich family protein	AT5G07020	no	-0.463609	yes	-1.87656	✓
4	GRMZM2G397616	tasselsheath1 paralog (tsh1b); GATA family TF	AT2G18380;AT3G50870;AT4G36620	yes	-1.56877	yes	-2.39438	✓
4	GRMZM5G805685	B3 family TF	AT2G36080;AT3G11580;AT5G06250	yes	-1.01318	no	-0.258026	✓
5	AC198923.4_FG002	[arabinogalactan protein 26]	AT2G47930	no	-2.4106	yes	-4.68169		✓
6	GRMZM2G112598	auxin efflux carrier family protein	AT2G17500;AT5G65980	no	0.509082	yes	-1.58452		✓
6	GRMZM2G131262	glucan endo-1,3-beta-glucosidase 3; X8-GPI family; [plasmodesmata callose-binding protein]	AT1G13830;AT1G18650;AT1G26450;AT1G69295;AT2G03505;AT5G08000;AT5G61130	no	-0.328261	yes	-1.45529	✓	✓
6	GRMZM2G472643	CBL-interacting serine/threonine-protein kinase 15	AT3G23000;AT4G14580	no	0.27788	yes	-3.52911	✓	✓
6	GRMZM5G821637	ankyrin repeat domain-containing protein 2	NA	no	-0.209572	yes	-1.57179	✓	✓
7	AC217887.3_FG004	glucan endo-1,3-beta-glucosidase 5	AT5G20870	yes	-0.807846	yes	-2.08709	✓
7	GRMZM2G022904	cytochrome P450 monoxygenase	AT1G67110;AT5G38450	no	0.448981	yes	-1.44849		✓
7	GRMZM2G127031	serine/threonine protein kinase; [root-specific kinase]	AT1G72540;AT2G05940;AT2G26290;AT5G35580	yes	-1.04785	yes	-2.57237	✓
7	GRMZM2G127035		NA	no	-0.15671	yes	-1.36989	✓
7	GRMZM2G143723	C2H2 family TF	NA	no	-0.603954	yes	-1.15856	✓	✓
7	GRMZM2G179677	ZmIDD-p1; C2H2 family TF; IDD - [indeterminate (ID) domain 4/5]	AT1G14580;AT2G02070;AT2G02080	no	-0.140644	yes	-0.567896		✓
8	AC187891.3_FG006	DUF623; [Ovate family protein]	AT2G36026;AT3G52525;AT5G22240	yes	-1.38489	yes	-1.96553	✓
8	GRMZM2G013960	C2H2 family TF	NA	yes	-1.38914	yes	-1.44101		✓
8	GRMZM2G020091	tetraspanin	AT3G45600;AT5G60220	yes	-0.688895	no	-0.760084	✓	✓
8	GRMZM2G031925		NA	yes	-0.884015	yes	-1.14569	✓
8	GRMZM2G034598	beta-hexosaminidase; [beta-hexosaminidase 1 (HEXO1)]	AT3G55260	yes	-0.774762	no	-0.611664		✓
8	GRMZM2G040441	barley mlo defense gene homolog2	NA	yes	-0.606656	yes	-0.791309	✓
8	GRMZM2G064590	acyltransferase	NA	yes	-1.31359	yes	-1.62441	✓
8	GRMZM2G079316	DUF1685; TFIIB-related; [unknown protein]	AT2G15590;AT2G15610;AT3G50350;AT4G33985	yes	-1.14353	yes	-1.66286		✓
8	GRMZM2G080603	glycine-rich protein1 (grp1); [cold, circadian rhythm, and rna binding (CCR)]	AT2G21660;AT4G39260	yes	-1.4949	yes	-1.36303		✓
8	GRMZM2G087068	Cytochrome c oxidase biogenesis protein	AT4G21192	yes	-1.06451	yes	-1.30237	✓
8	GRMZM2G093895	TCP family TF	AT1G35560;AT1G58100;AT1G72010	yes	-1.03858	yes	-1.26586		✓
8	GRMZM2G105863	[ROP interactive partner]	AT1G17140;AT1G78430	yes	-1.53574	yes	-1.72348	✓
8	GRMZM2G152919	ARM repeat superfamily protein; ubiquitin ligase activity	AT3G49810;AT5G65920	yes	-0.558968	no	-0.624112	✓
8	GRMZM2G166445		AT3G22820;AT4G14723	no	-0.921947	yes	-1.00216		✓
8	GRMZM2G175543	ethylene responsive element binding factor	AT1G50640;AT3G20310	yes	-1.16278	yes	-2.17965	✓	✓
8	GRMZM2G181607	thioredoxin family protein	AT1G08570;AT2G33270	yes	-0.697475	no	-0.151495		✓
8	GRMZM2G369815	GDSL-like Lipase/Acylhydrolase superfamily	AT3G48460	yes	-1.11617	yes	-2.2861		✓
8	GRMZM2G427618	gibberellin 2-beta-dioxygenase	AT1G30040;AT1G78440;AT2G34555	yes	-1.24417	yes	-2.54616	✓
8	GRMZM2G441906	Grx_A2 - glutaredoxin subgroup III	AT4G33040;AT5G11930	yes	-1.49805	yes	-1.54813	✓
8	GRMZM2G442791	Glutaredoxin	NA	yes	-1.60228	yes	-2.00352	✓
8	GRMZM2G467756	Znf_C3HC4_RING-type protein binding	NA	yes	-1.72081	yes	-2.15373		✓
8	GRMZM2G476523	thaumatin-like protein; [Pathogenesis-related thaumatin]	AT1G18250;AT1G73620	yes	-1.56636	yes	-2.47611		✓
9	GRMZM2G110195	[amino acid permease]	AT1G44100;AT1G77380;AT5G09220;AT5G63850	no	-0.45146	yes	-1.6493		✓
9	GRMZM2G139324		AT5G67390	yes	-1.34126	yes	-2.37059	✓	✓
9	GRMZM2G162305		AT1G29195	yes	-0.969305	yes	-1.91589	✓
9	GRMZM2G316534	sialyltransferase-like protein; [Glycosyltransferase family 29]	AT1G08280	no	-0.577818	yes	-1.81402	✓	✓
9	GRMZM2G373928	ZCN14 protein (ZCN14)	NA	yes	-0.810041	no	-0.860438		✓
9	GRMZM2G444748	bZIP family TF; [G-box binding factor]	AT1G75390;AT4G34590	yes	-0.633139	yes	-1.39151		✓
9	GRMZM5G893343	[adenylate cyclase]	AT2G11890	yes	-0.728309	yes	-1.7175	✓	✓
10	GRMZM2G128986		NA	yes	-1.42728	no	-1.28296	✓
11	AC177946.2_FG004	phosphopyruvate hydratase complex protein	NA	yes	-3.00578	yes	-1.79769e+308	✓
11	GRMZM2G002147	ARM repeat superfamily	AT4G15830	yes	-0.714804	yes	-1.57699	✓
11	GRMZM2G006676	DNA binding activity	NA	no	-0.353649	yes	-2.61746	✓
11	GRMZM2G016605		NA	yes	-0.719344	yes	-1.16001	✓
11	GRMZM2G022642	amino acid permease	NA	yes	-0.423518	yes	-0.942872		✓
11	GRMZM2G054032	F-box family protein	AT4G33160	yes	-1.54393	yes	-2.27929	✓
11	GRMZM2G071907	transcription factor activity	NA	yes	-0.968524	yes	-1.60219	✓	✓
11	GRMZM2G089995	ethylene-responsive transcription factor 4	NA	no	0.274941	yes	-2.80587	✓
11	GRMZM2G090010	aminopeptidase activity	NA	yes	-1.54423	yes	-1.37857	✓
11	GRMZM2G094589	[Late embryogenesis abundant (LEA)]	AT3G05975	yes	-1.32971	yes	-1.56021	✓
11	GRMZM2G097900	calmodulin-related protein 2	AT1G18210; AT1G73630	no	0.404089	yes	-2.61199	✓
11	GRMZM2G138067	DUF567	AT1G80120;AT3G15810	no	-0.191855	yes	-2.09049	✓
11	GRMZM2G165461	[spiral1]	AT1G26355;AT1G69230;AT2G03680;AT3G02180;AT5G15600	yes	-1.20676	yes	-1.47032		✓
11	GRMZM2G170338	defense-related protein	NA	yes	-1.07366	yes	-1.85881	✓	✓
11	GRMZM2G364612	[zinc finger (C3HC4-type RING finger) family protein]	AT2G39720;AT3G46620;AT5G59550	no	-0.349616	yes	-1.74068	✓
11	GRMZM2G444743	[2-oxoglutarate (2OG) and Fe(II)-dependent oxygenase superfamily protein]	AT4G22870	yes	-0.936371	yes	-2.46135		✓
11	GRMZM2G444819	[unknown function]	AT1G29640;AT2G34340;AT4G18980;AT5G45630	no	-0.302299	yes	-3.51171	✓
11	GRMZM5G836977	phospholipase	NA	no	0.745578	yes	-3.56367		✓
12	GRMZM2G013002	[member of beta-expansin family]	AT1G65680;AT1G65681;AT2G45110;AT3G60570	no	-0.455162	yes	-1.36311	✓	✓
12	GRMZM2G046729	atypical receptor-like kinase MARK	AT1G48480;AT3G02880;AT3G17840;AT5G16590	yes	-0.749076	yes	-1.18935	✓
12	GRMZM2G058595	Phototropic-responsive NPH3 family protein; BTB/POZ_fold; [ROOT PHOTOTROPISM 2 (RPT2)]	AT2G30520	no	-0.74512	yes	-3.27601	✓	✓
12	GRMZM2G083526	[ECERIFERUM 3 (CER3)]	AT5G57800	no	-0.488478	yes	-1.84237	✓	✓
12	GRMZM2G109130	lipoxygenase	AT1G55020;AT3G22400	yes	-0.689253	yes	-1.57238		✓
12	GRMZM2G122277	[cellulose synthase-like D6]	AT1G32180	no	-0.0981979	yes	-0.823844	✓
12	GRMZM2G136266	bZIP family TF; [VIRE2-interacting protein 1]	AT1G43700	yes	-0.555418	no	-0.525292		✓
12	GRMZM2G160585	glycosyltransferase (pglcat7) [IRX14]	AT4G36890;AT5G67230	no	0.198034	yes	-2.00969	✓	✓
12	GRMZM2G175562	[Photosystem II manganese-stabilising protein (PsbO) family]	AT3G50820;AT4G37230;AT5G66570	no	-0.659793	yes	-1.29331	✓	✓
12	GRMZM2G302045	unknown function	AT5G27730	no	0	yes	-2.67367	✓
12	GRMZM2G343157	ZIM motif family protein; [jasmonate-zim-domain protein]	AT1G17380;AT1G19180;AT1G72450;AT1G74950	no	-0.281615	yes	-1.27601	✓
12	GRMZM2G344993	[UDP-glucosyl transferase]	AT1G05530;AT1G05560;AT4G14090;AT4G15550	yes	-0.82076	yes	-1.3851	✓	✓
12	GRMZM2G455809	tassel seed2 (ts2)	AT3G51680	yes	-0.890156	yes	-1.86919	✓	✓
12	GRMZM2G460566		NA	no	-0.835925	yes	-2.15878	✓	✓
13	GRMZM2G168651	cell wall protein (AA 1-267) (HRGP)	NA	yes	-0.272823	yes	-0.832734		✓
14	GRMZM2G099305	[Acyl-CoA N-acyltransferases (NAT); HOOKLESS 1 (HLS1)]	AT2G23060;AT4G37580;AT5G67430	no	-0.62952	yes	-1.35107	✓
15	GRMZM2G004511	[Remorin family protein]	AT2G41870;AT3G57540	no	-0.139999	yes	-2.10859	✓	✓
15	GRMZM2G010855	PP2C-related	NA	no	-0.182871	yes	-2.38419	✓
15	GRMZM2G022318	metal ion transport	NA	no	-1.00348	yes	-1.40699	✓	✓
15	GRMZM2G026847		NA	yes	-1.38865	yes	-3.26642	✓	✓
15	GRMZM2G055313	xylosyltransferase oxt; [Core-2/I-branching beta-1,6-N-acetylglucosaminyltransferase family protein]	AT1G53100;AT3G15350;AT4G27480	no	-0.653519	yes	-1.24024	✓
15	GRMZM2G143499	peptidyl-tRNA hydrolase 2	AT3G03010;AT5G16870	yes	-0.789665	no	-0.318161	✓	✓
15	GRMZM2G401331		NA	yes	-1.44732	yes	-1.55222	✓	✓
15	GRMZM2G417166		NA	yes	-0.88018	yes	-3.52037	✓	✓
16	GRMZM2G002304	tropinone reductase 2	AT1G07440;AT1G07450;AT2G29150;AT2G29170;AT2G29290;AT2G29300;AT2G29310;AT2G29320;AT2G29330;AT2G29340;AT2G29350;AT2G29360;AT2G29370;AT2G30670	no	-0.985074	yes	-5.01655	✓
16	GRMZM2G010596	3-methyl-2-oxobutanoate hydroxymethyltransferase; [ketopentoate hydroxymethyltransferase]	AT2G46110;AT3G61530	yes	-0.571845	no	-0.731611	✓	✓
16	GRMZM2G062527	GAST1 protein; [Gibberellin-regulated family protein]	AT3G10185	no	-0.32169	yes	-1.51283	✓
16	GRMZM2G083538		NA	yes	-1.20749	no	-0.742936	✓	✓
16	GRMZM2G105330	[AMP-dependent synthetase and ligase family protein]	AT1G21530;AT1G21540;AT1G75960;AT1G77240;AT5G16340;AT5G16370	no	-0.384175	yes	-1.73594	✓	✓
16	GRMZM2G107711		NA	yes	-1.15112	yes	-1.98469		✓
16	GRMZM2G123202	MYB famliy TF; [myb domain protein 17]	AT3G61250	yes	-0.747489	no	-1.00008		✓
16	GRMZM2G133483		NA	yes	-1.13177	yes	-2.30155	✓
16	GRMZM2G151811	[EIN3-like]	AT2G27050;AT3G20770;AT5G21120	no	-0.138116	yes	-2.02946	✓	✓
16	GRMZM2G174274	Rho GTPase	NA	no	-0.902956	yes	-2.58303		✓
16	GRMZM2G312419	MYB famliy TF; [myb domain protein 56]	AT5G17800	yes	-0.963841	yes	-1.47032		✓
18	GRMZM2G024482	[Thioesterase superfamily protein]	AT2G22230;AT5G10160	yes	-0.625114	no	-0.0921732	✓
19	GRMZM2G007324	DUF620	AT1G27690;AT1G49840;AT3G19540	yes	-0.770875	yes	-1.59307		✓
19	GRMZM2G021621	[beta expansin family]	AT1G65680;AT1G65681;AT2G45110;AT3G60570	no	-0.230899	yes	-1.1192	✓
19	GRMZM2G050305	MYB famliy TF	AT1G22640;AT1G35515;AT1G71030;AT2G16720;AT4G09460;AT4G34990;AT4G38620	yes	-0.803015	no	-0.772043	✓	✓
19	GRMZM2G052467		AT1G21010;AT1G76600;AT2G23690;AT3G50800;AT4G37240;AT5G66580	no	-0.160888	yes	-3.21043	✓
19	GRMZM2G058531	Phototropic-responsive NPH3;BTB/POZ-like	AT3G08570;AT3G08660	yes	-0.596486	yes	-1.50765	✓	✓
19	GRMZM2G073044	LOB family TF	AT1G67100;AT1G68510;AT3G02550	yes	-0.703621	yes	-2.03026	✓
19	GRMZM2G074032	LOOSE PLANT ARCHITECTURE 1 (LPA1); C2H2 family TF; INDETERMINATE DOMAIN (IDD) protein	AT1G25250;AT1G68130;AT2G01940	yes	-1.21874	yes	-1.94683		✓
19	GRMZM2G082032	[N-terminal nucleophile aminohydrolase]	AT3G16150	no	-0.209454	yes	-3.10881		✓
19	GRMZM2G085892	MYND finger family protein	AT1G67340;AT5G50450	yes	-1.35391	yes	-2.72816	✓
19	GRMZM2G087878		NA	no	-0.514745	yes	-2.58694	✓
19	GRMZM2G112629	bHLH family TF	AT1G10585;AT1G10586	no	0.517346	yes	-2.62867		✓
19	GRMZM2G114893		AT1G62520;AT4G12450;AT4G22560	yes	-1.27003	yes	-2.67081		✓
19	GRMZM2G125507	septum-promoting GTP-binding protein 1	AT3G21700;AT5G54840	yes	-1.11071	no	-0.394331	✓
19	GRMZM2G127404	[Nucleotide-diphospho-sugar transferase]	AT1G64980	yes	-0.710077	no	-0.834083		✓
19	GRMZM2G134334	AN18	AT3G12630	no	0.383319	yes	-2.58125	✓	✓
19	GRMZM2G151319	carboxyl-terminal proteinase	AT1G10750;AT5G50150	yes	-0.662398	yes	-1.14762	✓
19	GRMZM2G162020	IQ-domain protein	AT1G01110;AT3G49380;AT4G00820;AT4G10640	yes	-1.65914	yes	-2.12315	✓	✓
19	GRMZM2G179777	triacylglycerol lipase	NA	yes	-0.935887	yes	-2.28881		✓
19	GRMZM2G322618	[Glycoprotein membrane precursor GPI-anchored]	AT1G54860;AT3G06035;AT5G19230;AT5G19240;AT5G19250	no	-0.514934	yes	-1.18811	✓
19	GRMZM2G531230	[N-terminal nucleophile aminohydrolase]	AT3G16150	no	-0.496305	yes	-3.41214		✓
19	GRMZM5G822440	[ARM repeat superfamily protein]	AT1G61350	yes	-0.700252	yes	-2.02318	✓
19	GRMZM5G832281		NA	yes	-0.785083	yes	-1.84405	✓
19	GRMZM5G846152	DUF538	AT3G07460;AT3G07470;AT5G16380	yes	-0.944931	yes	-1.76226		✓
19	GRMZM5G875864	Glycosyltransferase	NA	yes	-0.700063	yes	-1.83974	✓	✓
19	GRMZM5G879527	bHLH family TF	AT1G51140;AT2G42280	yes	-0.638949	yes	-1.04392	✓
19	GRMZM5G879665	carboxy-lyase	NA	yes	-1.1652	no	0.350149	✓	✓
19	GRMZM5G891967		AT1G52140;AT3G16330;AT4G29110	yes	-1.61918	yes	-2.18896	✓
20	GRMZM2G060079	oxidoreductase, 2OG-Fe oxygenase family protein	AT2G48080;AT4G02940	no	-0.206998	yes	-0.822409	✓
20	GRMZM2G175860	[HSP40/DnaJ peptide-binding protein]	AT1G11040;AT1G44160	yes	-0.904407	yes	-1.83397	✓
NA	AC203535.4_FG002	NAC family TF	NA	yes	-1.27241	yes	-2.08221	✓
NA	AC211178.3_FG004		NA	no	0	yes	-1.79769e+308	✓
NA	GRMZM2G001934	serine/threonine kinase	NA	yes	-0.49318	no	-1.40719		✓
NA	GRMZM2G010000	[Tetratricopeptide repeat (TPR)-like]	AT1G02650;AT2G47440;AT3G62570;AT4G02100	yes	-0.74651	yes	-1.73728		✓
NA	GRMZM2G025685		NA	yes	-0.553387	yes	-1.13015	✓
NA	GRMZM2G036092	DNA binding protein	NA	yes	-0.876757	yes	-1.23691	✓
NA	GRMZM2G048497	homoserine kinase	AT2G17265;AT4G35295	yes	-0.702907	yes	-1.54398	✓
NA	GRMZM2G057753	DUF623; [ovate family protein]	AT2G36050;AT3G52540;AT5G04820	yes	-1.15119	yes	-1.49543	✓
NA	GRMZM2G060837	[xyloglucan endotransglucosylase/hydrolase]	AT1G32170;AT4G18990	no	-0.363016	yes	-2.14411	✓	✓
NA	GRMZM2G063363	PapD-like superfamily protein	AT4G05060;AT4G21450;AT5G54110	yes	-0.676196	no	-0.360529	✓
NA	GRMZM2G070167	light-induced protein 1-like (lir1); [CCR-like]	AT3G26740	yes	-0.790543	yes	-1.23192		✓
NA	GRMZM2G093325		AT5G58575	yes	-1.02139	yes	-1.28381		✓
NA	GRMZM2G103116	microtubule motor; [Dynein light chain type 1 family protein]	AT1G23220	yes	-0.896901	no	-0.396076	✓
NA	GRMZM2G105901		AT2G24550;AT4G31510;AT5G24890	yes	-1.19025	yes	-1.98552	✓
NA	GRMZM2G113863	copper chaperone	AT5G27690	yes	-0.795621	yes	-1.47637	✓
NA	GRMZM2G133428	[HCP-like superfamily protein with MYND-type zinc finger]	AT1G67340;AT5G50450	yes	-1.08165	yes	-2.12774	✓
NA	GRMZM2G147701	[NAD(P)-binding Rossmann-fold superfamily protein]	AT3G06060;AT5G19200	yes	-0.722141	yes	-1.14552	✓	✓
NA	GRMZM2G154328	[TMPIT-like protein]	AT1G33230;AT4G10430	yes	-0.97645	no	0.486798	✓
NA	GRMZM2G171073	C2H2 family TF; INDETERMINATE DOMAIN (IDD) protein; ENHYDROUS	AT3G50700;AT5G66730	yes	-0.924896	yes	-1.73371	✓	✓
NA	GRMZM2G304010	ubiquitin ligase; [plant U-box 8 (PUB8)]	AT4G21350	yes	-0.855507	yes	-1.78595	✓
NA	GRMZM2G313448	[ROP interactive partner]	AT2G37080;AT3G53350;AT5G60210	yes	-1.33195	yes	-0.985036		✓
NA	GRMZM2G317451		AT5G55710	yes	-0.728398	no	-0.882065	✓	✓
NA	GRMZM2G339540	[Leucine-rich repeat protein kinase family protein	AT2G26730	yes	-0.708491	yes	-1.76402		✓
NA	GRMZM2G346920	ZF-HD family TF	AT4G24660;AT5G65410	no	-0.909401	yes	-1.58016	✓	✓
NA	GRMZM2G400268	RING finger protein 5	AT1G19310;AT1G74990;AT2G23780;AT4G03510;AT4G27470;AT4G28270	yes	-0.664034	yes	-1.14325	✓
NA	GRMZM2G472651	tha4 protein (tha4); [Bacterial sec-independent translocation protein mttA/Hcf106]	AT5G28750	yes	-0.845153	yes	-1.57573	✓	✓
NA	GRMZM5G821139		AT3G54000;AT5G59050	yes	-0.619224	yes	-0.986618		✓
NA	GRMZM5G834697	serine/threonine kinase; [MAP kinase kinase]	AT1G51660;AT3G21220	yes	-0.670867	yes	-1.98208	✓
NA	GRMZM5G847159	cytochrome P450 monoxygenase	NA	yes	-0.93628	yes	-2.08891	✓	✓
NA	GRMZM5G886709	[SWIB complex BAF60b domain-containing protein]	AT1G49520;AT3G19080	yes	-0.726138	no	-0.162397	✓	✓
Repressed targets (bound and up-regulated in ramosa1 mutants)
				1mm		2mm
clustera	maize.gene.id	annotationb	arabidopsis.gene.id(s)c	DEd	ln fce	DE	ln fc	ear	tassel
2	GRMZM2G017654	serine/threonine kinase; [MAP3K epsilon protein kinase]	AT3G07980;AT3G13530	no	0.507441	yes	1.38448	✓
2	GRMZM2G059937	outer mitochondrial membrane protein porin; [voltage dependent anion channel 4]	AT5G57490	yes	1.24091	yes	1.42778		✓
2	GRMZM2G061876	GTPase activity; [elongation factor family protein]	AT5G13650	no	0.0057257	yes	1.22748	✓
2	GRMZM2G070633		AT1G36990;AT4G08510	no	0.206208	yes	1.44935	✓	✓
2	GRMZM2G317835		NA	no	0.481875	yes	1.62642		✓
2	GRMZM2G357804	[SPINDLY (SPY)]	AT3G11540	no	0.167708	yes	1.18173		✓
2	GRMZM2G377539		NA	no	0.141917	yes	0.628712	✓
2	GRMZM2G395736	BRCT domain protein; [meiosis defective 1 (MEI1)]	AT1G77320	no	0.0796538	yes	1.41059	✓
2	GRMZM5G893913		NA	no	-0.0678127	yes	1.35803	✓	✓
5	GRMZM2G050734	ubiquitin ligase complex protein; [ARM repeat superfamily protein]	AT4G36550	no	0.0458494	yes	1.09816	✓
10	GRMZM5G817934	SWIB/MDM2 domain protein	NA	no	0.16918	yes	1.59758	✓	✓
11	GRMZM2G317450	bHLH family TF; [BES1-interacting Myc-like protein; BIM1]	AT1G69010;AT5G08130;AT5G38860	yes	1.79769e+308	no	1.79769e+308	✓	✓
13	GRMZM2G022065	[SUMO E3 ligase]	AT3G15150	no	0.375377	yes	1.18482		✓
13	GRMZM2G119300	[Glucose-1-phosphate adenylyltransferase family protein; CYTOKINESIS DEFECTIVE 1 (CYT1)]	AT2G39770;AT3G55590;AT4G30570	no	0.522736	yes	1.2917		✓
13	GRMZM2G324083	[NADH-ubiquinone oxidoreductase B18 subunit]	AT2G02050	yes	1.12816	yes	1.97		✓
13	GRMZM5G850966	[Ribosomal protein L36e family protein]	AT2G37600;AT3G53740;AT5G02450	no	-0.105735	yes	1.09252	✓	✓
14	GRMZM2G005435	[PPPDE putative thiol peptidase family protein]	AT1G47740	yes	0.539537	yes	1.18636		✓
16	GRMZM2G036297	liguleless1 (lg1)	NA	no	1.1407	yes	2.91712		✓
17	AC199001.3_FG005		NA	yes	0.642176	no	0.940545		✓
17	GRMZM2G005236	RNA-recognition domain	NA	no	0.357983	yes	1.29703	✓	✓
17	GRMZM2G014295	[Putative methyltransferase family protein]	AT2G26810	no	-0.148806	yes	1.16622		✓
17	GRMZM2G050882	DNA/RNA helicase; DEAD domain containing	NA	no	0.416434	yes	1.82349	✓
17	GRMZM2G070708	[Galactosyltransferase family protein]	AT1G22015;AT1G77810	no	0.322918	yes	1.08083	✓	✓
17	GRMZM2G083394	cysteine-type endopeptidase	AT5G01660	no	0.0722648	yes	1.18019		✓
17	GRMZM2G138230	[RNA helicase;LOW-LEVEL BETA-AMYLASE 1 (LBA1)]	AT5G47010	no	0.356268	yes	1.08013		✓
17	GRMZM2G461936	[ARGONAUTE 5 (AGO5)]	AT2G27880	no	0.26958	yes	1.26543	✓	✓
17	GRMZM2G467717	[neurochondrin family protein]	AT4G32050	no	0.264116	yes	0.868426		✓
17	GRMZM5G840909	[Cytidine/deoxycytidylate deaminase family protein]	AT5G28050	no	0.459348	yes	1.44768	✓
18	AC190909.3_FG004	[glucan synthase-like; callose synthase]	AT1G05570;AT2G31960;AT5G13000;AT5G36870	no	0.54891	yes	1.96493	✓	✓
18	AC205730.3_FG002		NA	no	0.716536	yes	2.08809		✓
18	GRMZM2G018951	[P-loop containing nucleoside triphosphate hydrolases superfamily protein]	AT1G55550	no	0.276753	yes	1.22312		✓
18	GRMZM2G040968	[chloroplastidic phosphoglucan, water dikinase (PWD)]	AT5G26570	no	0.29757	yes	1.10393	✓
18	GRMZM2G055880	[inner membrane protein OXA1-like]	AT2G46470;AT5G62050	no	0.337996	yes	1.24598	✓
18	GRMZM2G078576		AT1G04200	no	0.468101	yes	1.13116	✓
18	GRMZM2G087619	[ARM repeat superfamily protein]	AT1G77600	no	0.941988	yes	2.20842	✓	✓
18	GRMZM2G108655		NA	no	0.369169	yes	1.49539	✓
18	GRMZM2G115812	SAP domain containing protein	NA	yes	0.526041	no	1.21361	✓	✓
18	GRMZM2G136146		NA	no	0.222712	yes	1.56367	✓
18	GRMZM2G329454	[Homeodomain-like superfamily protein]	AT4G39160	no	-0.112263	yes	1.47864		✓
18	GRMZM2G340456	[P-loop containing nucleoside triphosphate hydrolases superfamily protein]	AT1G16800	no	0.324317	yes	1.82998	✓	✓
18	GRMZM2G353147	[RELA/SPOT homolog 1]	AT4G02260	no	-0.0432802	yes	1.67337	✓	✓
18	GRMZM2G381386	DNA/RNA helicase	AT2G40770	no	0.377121	yes	1.14182	✓	✓
18	GRMZM2G455433	DUF676; [alpha/beta-Hydrolases superfamily protein]	AT1G10040	no	1.10153	yes	2.13541	✓	✓
18	GRMZM2G461948	HECT domain containing protein; [ubiquitin-protein ligase 7]	AT3G53090	no	0.352019	yes	1.67761	✓	✓
18	GRMZM5G825524	vacuolar protein sorting 35	AT1G75850;AT2G17790;AT3G51310	no	0.432882	yes	1.34942	✓
20	GRMZM2G064732	compact plant (ct2); [G protein alpha subunit 1]	AT2G26300	no	0.447286	yes	0.91309		✓
20	GRMZM2G369912	protein phosphatase 2A regulatory subunit B' (PPP2R5B)	AT1G13460;AT3G21650;AT3G26020;AT3G26030;AT4G15415	no	0.158284	yes	1.22118		✓
20	GRMZM5G898141		NA	no	0.313615	yes	1.38804	✓
NA	GRMZM2G006780	Leucine-rich repeat protein	NA	no	0.493003	yes	1.44232	✓	✓
NA	GRMZM2G027756	GCK-like kinase MIK	AT1G53165;AT3G15220	no	0.465985	yes	1.37447		✓
NA	GRMZM2G051138	[RADIATION SENSITIVE 17]	AT5G66130	no	0.0125117	yes	1.15181	✓
NA	GRMZM2G076705	RNA binding protein	NA	no	0.152915	yes	1.27457	✓	✓
NA	GRMZM2G082874	plant-specific domain TIGR01589 family protein; protein of unknown function	AT3G10250;AT5G04090	no	0.112083	yes	1.04028	✓
NA	GRMZM2G089092	ATP binding protein	AT5G66005	no	0.158008	yes	1.36101	✓
NA	GRMZM2G105922	[Beta-glucosidase; GBA2 type family protein]	AT3G24180	no	0.274251	yes	1.66295	✓
NA	GRMZM2G114906		NA	no	0.479905	yes	1.09077		✓
NA	GRMZM2G125527	60S ribosomal protein L44	AT3G23390;AT4G14320	no	0.114477	yes	0.962617	✓
NA	GRMZM2G138076	[Outer membrane OMP85 family protein]	AT3G44160;AT3G48620	no	0.622129	yes	1.06156	✓
NA	GRMZM2G143651	NAD(P)-binding Rossmann-fold superfamily protein	AT2G20360	no	0.302079	yes	0.982799		✓
NA	GRMZM2G161168	dicarboxylic acid transport	AT3G19340;AT5G13940	yes	0.746841	yes	1.12025	✓	✓
NA	GRMZM2G172917		NA	no	0.230374	yes	1.46622	✓
NA	GRMZM2G175089	DNAJ heat shock N-terminal domain-containing protein	AT2G21510;AT4G39150	no	0.278064	yes	0.850789	✓	✓
NA	GRMZM2G347808	RNA methylation	NA	no	0.327951	yes	1.35308		✓
NA	GRMZM2G377589	Polynucleotidyl transferase, ribonuclease H-like superfamily protein	AT3G52905	no	0.364041	yes	1.33864	✓	✓
NA	GRMZM2G408834		NA	no	1.75689	yes	2.76548		✓
NA	GRMZM2G439589	NAD(P)-binding Rossmann-fold superfamily protein	AT2G39080	no	0.0349826	yes	1.24595	✓
NA	GRMZM2G441583	Piwi domain containing protein; Polynucleotidyl transferase, ribonuclease H-like superfamily protein	NA	no	0.350419	yes	0.948605		✓
NA	GRMZM5G822842		AT3G26890;AT5G41110	no	0.679631	yes	1.90675	✓	✓
NA	GRMZM5G843174		AT1G15215	no	-0.0331757	yes	1.38472	✓
NA	GRMZM5G882418	polygalacturonase	AT3G62110	no	0.361914	yes	0.929955	✓
