# Supplementary material for: Regulatory modules controlling maize inflorescence architecture
Source: HighWire-hosted journal article supplement (doi:10.1101/gr.166397.113), 2013-12-04
Supplement: Supp_Table16.xlsx [file Supp_Table16.xlsx]

## Sheet: Table_S16
Supplemental Table 16. Putative target genes bound by both RA1 and KN1.
aTarget class refers to type of co-bound target: Class 1 = RA1 and KN1 co-bound at same location within 10kb of gene; Class 2 = RA1 and KN1 co-bound at same location in intergenic regions and closest gene is assigned; Class3 = RA1 and KN1 bound within 10 kb of the same gene. bFunctional annotations, if available, based on classical maize gene annotations (i.e. maize genes that have been previousl…
	target classa			annotationb						1mm ra1 mutant ears			2mm ra1 mutant ears			kn1 mutant ears			kn1 mutant tassels
maize.gene.id	1	2	3	classical.maize.gene		Refseq.DNA	Entrez	GO	InterPro	DEc	q-valued	ln.fce	DE	q-value	ln.fc	DE	q-value	ln.fc	DE	q-value	ln.fc	clusterf
GRMZM2G030710	✓					NA	NA	DNA binding;nucleus;regulation of transcription, DNA-dependent;response to hormone stimulus;regulation of transcription	TF_B3; Auxin_resp	no	0.86128	0.0925321	no	0.409821	0.301274	yes	0.000819716	0.242372	yes	1.10213e-05	0.299347	2
GRMZM2G046480	✓					NA	NA	cation transport;cation transmembrane transporter activity;integral to membrane;transmembrane transport	NaCa_Exmemb; CaH_exchang; Cax	no	0.796637	-0.192326	no	0.332379	0.65766	no	0.776702	0.0721686	no	1.09876	0.0744166	14
GRMZM2G442791	✓					NA	NA	electron carrier activity;protein disulfide oxidoreductase activity;cell redox homeostasis	Glutaredoxin; Thioredoxin-like_fold; Glutaredoxin_sub; GlrX-like_pln_2	yes	1.15443e-07	-1.60228	yes	2.73622e-05	-2.00352	no	0.184068	-0.370127	no	1.12768	0.109566	8
GRMZM2G451314	✓					NA	NA	carboxy-lyase activity;carboxylic acid metabolic process;pyridoxal phosphate binding;homoiothermy;ice binding;response to freezing;homoiothermy;ice binding;response to freezing	Antifreeze_1	no	0.398694	-0.269627	no	0.436374	0.708391	no	0.255773	-0.098889	no	1.12841	0.0478735	NA
GRMZM2G144701	✓					NA	NA	NA	NA	no	0.371217	0.477108	no	0.0535963	1.38241	no	0.977549	-0.00775282	no	1.06309	-0.0986801	2
GRMZM2G087094	✓					VAMP protein SEC22 (LOC100284961), mRNA	VAMP protein SEC22	NA	NA	no	1	-2.30578	no	1	-3.00675	no	1	-1.20557	no	1	-0.307224	12
GRMZM2G114893	✓					NA	NA	type I hypersensitivity;homoiothermy;ice binding;response to freezing	Antifreeze_1; POA_allergen_C	yes	0.000204721	-1.27003	yes	4.12071e-08	-2.67081	no	0.973929	0.0322845	no	1.11787	-0.238978	19
GRMZM2G140901	✓					NA	NA	DNA binding;regulation of transcription;DNA binding;regulation of transcription	NAM	no	1	0	no	1	-1.79769e+308	no	1	-0.334272	no	1	0	12
GRMZM2G005844	✓					hypothetical protein LOC100275615 (LOC100275615), mRNA;hypothetical protein LOC100275615 (LOC100275615), mRNA;hypothetical protein LOC100275615 (LOC100275615), mRNA	hypothetical protein LOC100275615;hypothetical protein LOC100275615;hypothetical protein LOC100275615	nucleic acid binding;nucleobase, nucleoside, nucleotide and nucleic acid metabolic process;methyltransferase activity;methylation;nucleic acid binding;nucleobase, nucleoside, nucleotide and nucleic acid metabolic process;methyltransferase activity;methylation;nucleic acid binding;nucleobase, nucleoside, nucleotide and nucleic acid metabolic process;methyltransferase activity;methylation	NA	no	0.97783	0.0258714	no	0.275018	0.449301	yes	0.0027919	0.413205	no	1	0	14
GRMZM2G152919	✓					hypothetical protein LOC100383857 (LOC100383857), mRNA	hypothetical protein LOC100383857;hypothetical protein LOC100383857;hypothetical protein LOC100383857	ubiquitin ligase complex;ubiquitin-protein ligase activity;binding;protein ubiquitination;ubiquitin ligase complex;ubiquitin-protein ligase activity;binding;protein ubiquitination;ubiquitin ligase complex;ubiquitin-protein ligase activity;binding;protein ubiquitination	Ubox_domain; ARM-type_fold; Armadillo	yes	0.0013101	-0.558968	no	0.0788072	-0.624112	no	0.492624	-0.110509	no	1.10777	-0.0477889	8
GRMZM2G060216	✓			lg2	liguleless2	liguleless2 (lg2), mRNA	liguleless2	transcription factor activity;nucleus;regulation of transcription, DNA-dependent;sequence-specific DNA binding;protein dimerization activity;transcription factor activity;nucleus;regulation of transcription, DNA-dependent;sequence-specific DNA binding;protein dimerization activity;DNA binding;ligand-dependent nuclear receptor activity;nucleus;regulation of transcription, DNA-dependent	NOR1_rcpt	no	0.0513924	-0.514667	no	0.994147	0.00746248	yes	1.14696e-06	-0.97939	no	1.12489	0.116026	4
GRMZM2G162020	✓					NA	NA	homoiothermy;ice binding;response to freezing	IQ_motif_EF-hand-BS; Antifreeze_1	yes	9.06535e-10	-1.65914	yes	1.65428e-05	-2.12315	yes	1.05642e-06	-0.43846	no	0.524667	-0.213725	19
GRMZM2G320325	✓					LOC100273146 (gpm405), mRNA	LOC100273146;LOC100273146	nucleotide binding;ATP binding;transport;phosphotransferase activity, alcohol group as acceptor;ATPase activity;nucleoside-triphosphatase activity;nucleotide binding;ATP binding;transport;phosphotransferase activity, alcohol group as acceptor;ATPase activity;nucleoside-triphosphatase activity;nucleotide binding;ATP binding;transport;phosphotransferase activity, alcohol group as acceptor;ATPase ac…	ABC_transporter-like; ATPase_AAA+_core; Uridine_kinase; ABC_transporter_CS; ATPase_SufC_FeS-cluster_assmbl	no	0.914025	-0.0676007	no	0.892611	0.0865517	no	0.333574	-0.188729	no	1.05307	0.0334578	NA
GRMZM2G104505	✓					NA	NA	transport;integral to membrane;vesicle-mediated transport	Synaptobrevin; Longin-like	no	0.36679	0.320778	no	0.192017	1.29276	no	0.761747	-0.0379223	no	1.06829	0.0225302	13
GRMZM2G160585	✓					glycosyltransferase (pglcat7), mRNA;LOC100281712 (umc1249), mRNA	LOC100281712;glycosyltransferase	galactosylgalactosylxylosylprotein 3-beta-glucuronosyltransferase activity;membrane	Glyco_trans_43	no	0.749323	0.198034	yes	7.25864e-05	-2.00969	no	0.832626	0.134757	no	1	-0.00656083	12
GRMZM2G097856	✓					NA	NA	protein domain specific binding;protein domain specific binding	14-3-3; WCOR413	no	0.866813	-0.0948153	no	0.672563	0.229515	no	0.571611	0.1341	no	1.02934	0.0198036	3
GRMZM2G317835	✓					NA	NA	NA	NA	no	0.358006	0.481875	yes	0.024208	1.62642	no	0.627383	0.0745526	no	1.0554	-0.0250194	2
GRMZM2G159285	✓					LOC100284262 (umc1534), mRNA	LOC100284262	nucleus;regulation of transcription;nucleus;regulation of transcription	AUX_IAA	no	0.741524	-0.188481	no	0.255672	-0.578639	yes	3.11178e-14	-0.729207	no	0.577481	-0.297485	5
GRMZM2G180435	✓					NA	NA	NA	NA	no	1	-0.638898	no	0.867332	0.166248	no	0.985019	-0.0115232	no	1.02367	-0.0183672	NA
GRMZM2G054715	✓					katanin p60 ATPase-containing subunit (LOC100283437), mRNA	katanin p60 ATPase-containing subunit	nucleotide binding;ATP binding;nucleobase, nucleoside, nucleotide and nucleic acid metabolic process;nucleoside-triphosphatase activity;nucleobase, nucleoside, nucleotide kinase activity;nucleotide binding;ATP binding;nucleobase, nucleoside, nucleotide and nucleic acid metabolic process;nucleoside-triphosphatase activity;nucleobase, nucleoside, nucleotide kinase activity;nucleotide binding;ATP bi…	Vps4_C	no	0.937991	0.0418723	no	0.111121	0.663551	no	0.570718	0.0910751	no	1.02086	-0.00638544	NA
GRMZM2G082260	✓					NA	NA	RNA binding;ribonuclease activity;RNA binding;ribonuclease activity;RNA binding;ribonuclease activity	NA	no	0.433943	0.346109	no	0.054875	1.14891	no	0.991416	-0.0056412	no	1.01496	0.00391293	NA
GRMZM2G047681	✓					NA	NA	NA	NA	no	0.481452	0.278013	no	0.141539	0.692874	no	0.445535	0.230046	no	1.08571	0.0525972	NA
GRMZM2G139324	✓					hypothetical protein LOC100279086 (LOC100279086), mRNA;hypothetical protein LOC100383267 (LOC100383267), mRNA	hypothetical protein LOC100279086;hypothetical protein LOC100383267	NA	NA	yes	2.41228e-07	-1.34126	yes	6.83226e-09	-2.37059	no	0.674596	-0.088531	no	1.10885	0.166786	9
GRMZM2G061396	✓					LOC100284773 (pco067049), mRNA	LOC100284773	NA	NA	no	1	0	no	1	-0.540038	no	1	1.14745	no	1	0.250585	NA
GRMZM2G041462	✓					NA	NA	DNA binding;transcription factor activity;nucleus;regulation of transcription, DNA-dependent;transcription regulator activity;sequence-specific DNA binding	Homeobox; Leu_zip_homeo; Homeodomain-like; HTH_lambrepressr; Homeobox_region; Homeobox_CS	no	0.705721	-0.229836	no	0.169852	-0.868684	no	0.387562	-0.395997	yes	0.013294	-0.63173	12
AC211349.4_FG001	✓					NA	NA	tRNA binding;nucleotide binding;magnesium ion binding;aminoacyl-tRNA ligase activity;phenylalanine-tRNA ligase activity;ATP binding;cytoplasm;translation;phenylalanyl-tRNA aminoacylation;tRNA processing;tRNA aminoacylation	Phenylalanyl-tRNA_Synthase; PheS_beta_Fdx_antiC-bd; Phe-tRNA-synth_IIc_mito	no	0.243183	0.861858	no	0.0858718	1.28998	no	0.657341	0.104838	no	1.03633	0.0215034	18
GRMZM2G144282	✓					eukaryotic translation initiation factor 3 subunit 1 alpha, 35kDa (LOC100283402), mRNA	eukaryotic translation initiation factor 3 subunit 1 alpha, 35kDa	NA	eIF3_subunit; Tubby_N	no	0.705347	-0.199373	no	0.356534	0.590808	no	0.124507	-0.160141	no	1.10129	0.0444702	6
GRMZM2G168651	✓			hrg1	hydroxyproline rich glycoprotein1	cell wall protein (AA 1-267) (HRGP), mRNA	NA	structural constituent of cell wall;extracellular region	Pistil_extensin; Adhesive_plaq	yes	0	-0.272823	yes	0	-0.832734	yes	0	0.128458	yes	0	0.14608	13
GRMZM2G127031	✓					NA	NA	protein kinase activity;protein serine/threonine kinase activity;ATP binding;protein amino acid phosphorylation	Se/Thr_prot_kinase-like_dom; Ser-Thr/Tyr-Pkinase; Kinase-like_dom; Tyr_Pkinase_cat_dom; Ser/Thr_prot_kinase_dom; Ser/Thr_prot_kinase_AS	yes	0.00462515	-1.04785	yes	3.49076e-07	-2.57237	no	1	1.07018	no	1	-0.056388	7
GRMZM2G371210	✓					NA	NA	inositol or phosphatidylinositol phosphatase activity	Endo/exonuclease/phosphatase; IPPc	no	0.94553	-0.0710823	no	0.0924672	1.24215	no	0.57498	-0.129799	no	1.12143	-0.0939091	18
GRMZM2G069827	✓					LOC100273036 (pco100749b), mRNA	LOC100273036	protein transport;protein transport;protein transport	Snf7	no	0.353084	-0.335824	no	0.583229	0.389217	no	0.923131	0.0157202	no	1.04442	0.0738232	NA
AC207533.2_FG002	✓					NA	NA	NA	NA	no	0.0893998	0.878722	no	0.291083	-0.750999	no	0.656431	-0.182603	no	1.06161	-0.0646916	2
GRMZM2G001145	✓					NA	NA	NA	NA	no	1	0	no	1	0	no	1	0	no	1	0	NA
GRMZM2G081585	✓					hypothetical protein LOC100193589 (LOC100193589), mRNA	hypothetical protein LOC100193589;hypothetical protein LOC100193589	superoxide dismutase activity;superoxide metabolic process;metal ion binding;oxidation reduction;superoxide dismutase activity;superoxide metabolic process;metal ion binding;oxidation reduction	Mn/Fe_SOD_N; Mn/Fe_SOD	no	0.282676	0.44715	no	0.232543	0.668254	no	0.751651	0.0926517	no	1.12297	0.0514053	NA
GRMZM2G305850	✓					NA	NA	NA	NA	no	1	0	no	1	0	no	1	0	no	1	0	NA
GRMZM2G099305	✓					hypothetical protein LOC100384002 (LOC100384002), mRNA	hypothetical protein LOC100384002	NA	NA	no	0.0546917	-0.62952	yes	0.00754502	-1.35107	yes	1.46159e-13	-1.16886	no	1.04446	-0.0632059	14
GRMZM2G103270	✓					hypothetical protein LOC100216999 (LOC100216999), mRNA	hypothetical protein LOC100216999;hypothetical protein LOC100216999	protein binding;zinc ion binding;protein binding;zinc ion binding;protein binding;zinc ion binding;protein binding;zinc ion binding	Ankyrin_rpt; Ankyrin_rpt-contain_dom; Znf_RING	yes	0.00403615	-0.66489	yes	0.00335852	-1.25216	no	0.525823	-0.210045	no	1.1139	0.070958	4
GRMZM2G160560	✓					transmembrane protein PFT27 (LOC100285764), mRNA	transmembrane protein PFT27	membrane;membrane	UPF0016	no	0.738028	0.161112	no	0.0503847	1.20814	no	0.389521	-0.150105	no	1.00553	0.000202805	14
GRMZM2G431157	✓					NA	NA	intracellular;zinc ion binding	TF_JmjC; Znf_C2H2; TF_JmjC_AAH; Znf_C2H2-like	no	0.637447	0.209195	no	0.110797	1.15733	no	0.933331	0.0143274	no	1.12645	-0.0514795	2
GRMZM2G701535	✓					NA	NA	NA	NA	no	1	2.37237	no	1	-5.23414	no	1	0	no	1	0.6872	NA
GRMZM2G170455	✓					NA	NA	NA	NA	no	1	0	no	1	0	no	1	0	no	1	0	NA
GRMZM2G515874	✓					NA	NA	transporter activity;sodium ion transport;membrane;transmembrane transport	Na/sul_symport	no	1	0	no	1	0.950677	no	1	0	no	1	0	NA
GRMZM2G021598	✓					hypothetical protein LOC100193463 (LOC100193463), mRNA	hypothetical protein LOC100193463;hypothetical protein LOC100193463	NA	OTU	no	0.973686	-0.0280222	no	0.123939	0.796426	no	0.425287	0.35446	no	1.09076	-0.0787454	NA
GRMZM2G021621	✓					NA	NA	extracellular region;sexual reproduction;extracellular region;sexual reproduction	RlpA; Expan_Lol_pI_C; Barwin-related_endoglucanase; LolPI; Expan_Lol_pI	no	0.597294	-0.230899	yes	0.0421492	-1.1192	no	0.605771	-0.0640998	yes	2.97286e-06	-0.353884	19
GRMZM2G074664	✓					NA	NA	hydrolase activity	NUDIX_hydrolase_dom; NUDIX_hydrolase_dom-like	no	1	-1.49324	no	1	2.69504	no	1	0.796663	no	1	-0.348862	NA
GRMZM2G317085	✓					NA	NA	NA	RlpA; Barwin-related_endoglucanase	no	1	0	no	1	0	no	1	0	no	1	0	NA
AC199001.3_FG005	✓					NA	NA	NA	NA	yes	0.0418973	0.642176	no	0.316923	0.940545	no	0.723614	-0.0407686	no	1.05045	-0.0154072	17
GRMZM2G107886	✓					zinc finger protein CONSTANS-LIKE 16 (LOC100283083), mRNA	zinc finger protein CONSTANS-LIKE 16	intracellular;zinc ion binding	Znf_B-box; CCT_domain	no	1	0	no	1	-1.79769e+308	no	1	0.111614	no	1	-0.458087	NA
GRMZM2G119273	✓					hypothetical protein LOC100216709 (LOC100216709), mRNA	hypothetical protein LOC100216709	NA	UPF0497_TM__pln	no	0.0941218	-0.618881	no	0.741775	0.164164	no	0.437455	0.22383	no	1.04283	-0.0336518	NA
GRMZM2G025685	✓					LOC100277279 (TIDP3183), mRNA	NA	transcription factor activity;nucleus;regulation of transcription, DNA-dependent;sequence-specific DNA binding;transcription factor activity;nucleus;regulation of transcription, DNA-dependent;sequence-specific DNA binding	NA	yes	0.00245388	-0.553387	yes	0.00242138	-1.13015	no	0.591423	0.0946017	no	1.03685	0.11192	NA
AC187891.3_FG006	✓					NA	NA	NA	DUF623	yes	4.97851e-07	-1.38489	yes	1.38335e-05	-1.96553	no	0.687677	-0.107813	no	0.205095	0.339007	8
AC191380.3_FG001	✓					NA	NA	NA	NA	no	1	0	no	1	0	no	1	0	no	1	0	NA
GRMZM2G049549	✓					hypothetical protein LOC100194126 (LOC100194126), mRNA	hypothetical protein LOC100194126;hypothetical protein LOC100194126	DNA photolyase activity;DNA repair;DNA photolyase activity;DNA repair	DNA_photolyase_N; Photolyase_FAD-bd/Cryptochr_C; Cryptochrome/DNA_photolyase_1; DNA_photolyase_1_CS_C; Cryptochrome_pln	no	1.00452	0.000469209	no	0.515684	-0.31894	no	0.717443	0.145145	no	1.03653	-0.0417671	NA
GRMZM2G171395	✓					NAM protein (LOC100280927), mRNA;hypothetical protein LOC100383099 (LOC100383099), mRNA;hypothetical protein LOC100280128 (LOC100280128), mRNA	NAM protein;hypothetical protein LOC100280128	DNA binding;regulation of transcription	NA	no	1	-1.0106	no	1	-0.349058	no	1	0.47635	no	1	0.508177	NA
GRMZM2G060319	✓					teosinte branched1 protein (LOC100286105), mRNA	teosinte branched1 protein	NA	Transcription_factor_TCP	no	1	-1.66564	no	1	-0.803551	no	1	-0.91414	yes	0.019411	-0.548824	12
GRMZM2G351330	✓					NA	NA	DNA binding;double-stranded DNA binding;transcription factor activity;nucleus;DNA topological change;regulation of transcription, DNA-dependent;transcription regulator activity;sequence-specific DNA binding	Homeobox; Leu_zip_homeo; Homeodomain-like; HTH_lambrepressr; Homeobox_region; Homeobox_CS; SASP_alpha/beta-type_CS	no	1	0.258319	no	1	-0.854563	no	1	0	no	1	-1.0515	NA
GRMZM5G845891	✓					hypothetical protein LOC100280385 (LOC100280385), mRNA	hypothetical protein LOC100280385	NA	NA	no	0.382795	-0.444781	no	0.247506	0.784363	no	0.603478	-0.0827711	no	0.783492	0.134349	17
GRMZM2G103116	✓					microtubule motor (LOC100285837), mRNA	microtubule motor	microtubule motor activity;microtubule associated complex;microtubule-based process	Dynein_light_chain_typ-1/2	yes	0.000834757	-0.896901	no	0.521914	-0.396076	yes	0.0456063	-0.327923	no	1.06962	0.0477537	NA
AC232289.2_FG006	✓					NA	NA	NA	SibA	no	1	0	no	1	0	no	1	0	no	1	0	NA
AC196709.3_FG001	✓					NA	NA	alpha2-adrenergic receptor activity;G-protein coupled receptor protein signaling pathway;integral to membrane	Adren_rcpt_A2A	no	1	0	no	1	0	no	1	0	no	1	0	NA
GRMZM2G062210	✓					fusca homolog (fus6), mRNA	fusca homolog	NA	26S_proteasome_reg_su-Rpn7	no	0.945417	-0.0369138	no	0.710443	0.237151	no	0.0576925	-0.14635	no	1.06857	0.0225768	NA
GRMZM2G026847	✓					NA	NA	hormone activity;structural molecule activity;structural constituent of cell wall;extracellular region;cell adhesion;actin cytoskeleton	Pistil_extensin; Vinculin; Kininogen; Inhibin_betaB	yes	2.76912e-06	-1.38865	yes	2.5456e-06	-3.26642	no	1	1.79769e+308	no	1	0	15
GRMZM2G165383	✓					phosphoserine phosphatase (LOC100285190), mRNA	phosphoserine phosphatase	catalytic activity;phosphoserine phosphatase activity;L-serine biosynthetic process;metabolic process;phosphatase activity	NA	no	0.324741	0.29102	no	0.432354	0.330736	no	0.576425	-0.0777111	no	1.06834	0.0267804	17
GRMZM2G089995	✓					ethylene-responsive transcription factor 4 (LOC100280806), mRNA;ethylene-responsive transcription factor 4 (LOC100304148), mRNA	ethylene-responsive transcription factor 4;ethylene-responsive transcription factor 4	DNA binding;transcription factor activity;regulation of transcription, DNA-dependent	TF_ERF_DNA-bd; DNA-bd_integrase-typ	no	0.569153	0.274941	yes	2.94494e-07	-2.80587	no	0.100763	0.712851	no	1.08604	-0.182012	11
GRMZM5G887216	✓					metal ion binding protein (LOC100284940), mRNA	metal ion binding protein	copper-exporting ATPase activity;ATP binding;ATP biosynthetic process;mercury ion transmembrane transporter activity;mercury ion transport;membrane;metal ion transport;metal ion binding;metal ion transmembrane transporter activity	HeavyMe_transpt; HG_scavenger; ATPase_P-typ_cat/Cu-transptr	no	1.00388	0.00145204	no	0.31097	0.650621	no	1.00099	0.00328383	no	1.12512	0.120939	4
GRMZM2G095389	✓					NA	NA	actin binding;structural molecule activity;GTP binding;microtubule;cytoskeleton organization;microtubule-based movement;protein complex;protein polymerization	Villin_headpiece; Tubulin_FtsZ_GTPase; WD40_repeat-like_dom; Beta_tubulin	no	0.900491	-0.104466	no	0.632303	0.327551	no	0.894066	0.0852392	no	1.04845	0.0629997	14
GRMZM2G004988	✓					GRF-interacting factor 3-like (GIF3), mRNA;SSXT protein (LOC100282896), mRNA	SSXT protein	NA	SSXT	no	0.851157	-0.0891429	no	0.333982	0.809216	no	0.47371	-0.0908603	no	1.0734	-0.0321155	1
GRMZM2G082312	✓					LOC100272482 (umc1737), mRNA	LOC100272482	NA	NA	no	0.48468	-0.269932	no	0.896076	-0.609108	no	0.592634	-0.0561424	no	0.990307	-0.0757375	4
GRMZM2G377589	✓					hypothetical protein LOC100217155 (LOC100217155), mRNA	hypothetical protein LOC100217155	nucleic acid binding;cytoplasm;nucleobase, nucleoside, nucleotide and nucleic acid metabolic process;DNA repair;DNA recombination;response to DNA damage stimulus;hydrolase activity, acting on ester bonds;nucleic acid binding;nucleic acid binding;nucleobase, nucleoside, nucleotide and nucleic acid metabolic process;hydrolase activity, acting on ester bonds	PolynucTfrase_RNaseH_fold; Resolv_RNaseH-like	no	0.640986	0.364041	yes	0.0368351	1.33864	no	0.872245	-0.067366	no	1.0144	0.00754654	NA
GRMZM2G073044	✓					seed specific protein Bn15D17A (LOC100282086), mRNA	seed specific protein Bn15D17A	NA	LOB	yes	0.0214671	-0.703621	yes	1.16033e-05	-2.03026	yes	6.98342e-05	0.406848	no	0.369481	-0.1623	19
GRMZM2G149756	✓					NA	NA	DNA binding;transcription factor activity;regulation of transcription, DNA-dependent	TF_ERF_DNA-bd; DNA-bd_integrase-typ	no	0.0832313	-1.01862	no	0.336752	-0.690898	no	1	-0.428602	no	1.06387	-0.29083	12
AC205725.3_FG010	✓					NA	NA	NA	UPF0120	no	0.86906	-0.108756	no	0.50344	0.426838	no	0.0972853	0.166135	no	1.02988	-0.0109789	20
GRMZM2G125557	✓					LOC100283971 (umc2505), mRNA;hypothetical protein LOC100384495 (LOC100384495), mRNA;hypothetical protein LOC100192502 (LOC100192502), mRNA	LOC100283971;hypothetical protein LOC100192502;hypothetical protein LOC100192502	NA	NA	yes	0.000157114	-0.845304	no	0.289123	-0.342338	no	0.0650945	0.249181	yes	2.17821e-07	-0.388503	1
GRMZM5G814787	✓					NA	NA	mitochondrial matrix	MAM33	no	1	0.10376	no	0.870642	0.260791	no	0.731606	-0.323531	no	1.0459	0.115045	NA
GRMZM2G040170	✓					NA	NA	NA	NA	no	1	0	no	1	0	no	1	0	no	1	0	NA
AC216872.3_FG002	✓					NA	NA	NA	NA	no	1	-1.79769e+308	no	1	-0.418772	no	1	0.643537	no	1	-1.79769e+308	NA
GRMZM2G025642	✓					hypothetical protein LOC100383060 (LOC100383060), mRNA	hypothetical protein LOC100383060;hypothetical protein LOC100383060	DNA binding;regulation of transcription;DNA binding;regulation of transcription	NAM	no	1	-1.15338	no	1	-2.32865	no	0.910229	-0.184643	no	1.1011	-0.311828	12
AC190576.2_FG002	✓					NA	NA	NA	NA	no	1	0	no	1	-0.486982	no	1	0	no	1	0	NA
GRMZM2G397616	✓					NA	NA	transcription factor activity;regulation of transcription, DNA-dependent;zinc ion binding;sequence-specific DNA binding	Znf_GATA	yes	1.27579e-07	-1.56877	yes	9.8539e-08	-2.39438	no	0.149773	-0.688277	yes	0.00309968	-0.641828	4
GRMZM2G157153	✓					hypothetical protein LOC100275692 (LOC100275692), mRNA	hypothetical protein LOC100275692	NA	DUF1645	no	1	0	no	1	0	no	1	0	no	1	0	NA
GRMZM2G158593	✓					LOC100216786 (cl57058_1b), mRNA	LOC100216786	NA	NA	no	1	-1.79769e+308	no	1	0	no	1	0	no	1	0	NA
GRMZM2G476523	✓					LOC100281263 (pco079405), mRNA	LOC100281263	NA	Thaumatin; Thaumatin_CS	yes	2.46741e-06	-1.56636	yes	0.00116011	-2.47611	no	0.429658	0.0779618	no	1.08773	0.0728185	8
GRMZM2G329146	✓					NA	NA	homoiothermy;ice binding;response to freezing	DUF241_pln; Antifreeze_1	no	1	0	no	1	-1.79769e+308	no	1	0	no	1	0	NA
GRMZM2G014005	✓					NA	NA	NA	NA	no	1	0	no	1	0	no	1	0	no	1	0	NA
GRMZM2G133428	✓					hypothetical protein LOC100273107 (LOC100273107), mRNA	hypothetical protein LOC100273107	zinc ion binding;transferase activity, transferring alkyl or aryl (other than methyl) groups	F-box_dom_cyclin-like; Sel1-like; Znf_MYND; F-box_dom_Skp2-like; EPSP_synthase_core; ETO	yes	0.000190496	-1.08165	yes	1.51326e-06	-2.12774	no	0.180327	-0.121559	no	1.03588	-0.0134112	NA
GRMZM2G065176	✓					NA	NA	NA	SH3_domain; SH3_2	no	1	-0.53937	no	0.257251	0.886894	no	0.84044	0.0996802	no	1.12908	0.175824	15
GRMZM2G123202	✓					NA	NA	DNA binding	Myb_DNA-bd; Homeodomain-like; SANT_DNA-bd	yes	0.00889987	-0.747489	no	0.084447	-1.00008	no	0.763092	-0.125561	no	0.550817	-0.318452	16
GRMZM5G822440	✓					hypothetical protein LOC100274194 (LOC100274194), mRNA	hypothetical protein LOC100274194;hypothetical protein LOC100274194	binding;binding	Armadillo; ARM-type_fold	yes	0.00950347	-0.700252	yes	6.82374e-07	-2.02318	no	0.344228	-0.179765	no	1.04039	0.0225316	19
GRMZM2G043926	✓					NA	NA	transporter activity;oligopeptide transport;membrane	Oligopeptide_transporter; MFS_general_subst_transpt	no	1	0	no	1	0	no	1	0	no	1	0	NA
GRMZM2G037140	✓					hypothetical protein LOC100192897 (LOC100192897), mRNA	hypothetical protein LOC100192897	actin binding;intracellular;actin binding;intracellular;actin binding;intracellular	Actin-bd_cofilin/tropomyosin	no	0.83468	-0.0846554	no	0.55773	-0.357279	yes	0.00197024	-0.155485	no	1.10867	-0.0501439	3
GRMZM2G061023	✓					hypothetical protein LOC100192883 (LOC100192883), mRNA	hypothetical protein LOC100192883;hypothetical protein LOC100192883	DNA binding;nuclease activity;protein binding;DNA metabolic process;DNA binding;nuclease activity;protein binding;DNA metabolic process;magnesium ion binding;DNA binding;nuclease activity;protein binding;DNA metabolic process;metabolic process;lyase activity;DNA binding	Restrct_endonuc_II-like; RuvA_2-like	no	0.879677	0.0592257	no	0.0690935	0.785375	no	0.915133	0.0194786	no	1.08183	0.0275697	2
AC205730.3_FG002	✓					NA	NA	NA	NA	no	0.456281	0.716536	yes	0.020739	2.08809	no	0.765385	0.0534975	no	1.07772	-0.120373	18
GRMZM2G005301	✓					NA	NA	DNA binding;transcription factor activity;regulation of transcription, DNA-dependent	TF_ERF_DNA-bd; DNA-bd_integrase-typ	no	1	1.79769e+308	no	1	1.79769e+308	no	1	0	no	1	-0.680136	NA
GRMZM2G022318	✓					hypothetical protein LOC100382282 (LOC100382282), mRNA;hypothetical protein LOC100382282 (LOC100382282), mRNA;hypothetical protein LOC100382282 (LOC100382282), mRNA;hypothetical protein LOC100382282 (LOC100382282), mRNA	hypothetical protein LOC100382282;hypothetical protein LOC100382282;hypothetical protein LOC100382282;hypothetical protein LOC100382282	membrane;metal ion transport;metal ion binding;protein homooligomerization;membrane;metal ion transport;metal ion binding;protein homooligomerization;membrane;metal ion transport;metal ion binding;protein homooligomerization;membrane;metal ion transport;metal ion binding;protein homooligomerization	HeavyMe_transpt; Transloc_intimin_rcpt; Prion	no	0.742054	-1.00348	yes	0.00160004	-1.40699	no	0.259344	0.0729711	yes	0.00138439	0.178556	15
GRMZM2G370985	✓					NA	NA	NA	NA-bd_OB-fold-like	no	1	0	no	1	0	no	1	0	no	1	0	NA
GRMZM2G074032	✓					NA	NA	intracellular;zinc ion binding;homoiothermy;ice binding;response to freezing	Znf_C2H2; Znf_C2H2-like; Antifreeze_1	yes	3.48354e-06	-1.21874	yes	0.000190159	-1.94683	no	0.306543	-0.209855	no	0.630647	-0.22007	19
GRMZM5G897473	✓					NA	NA	membrane;protein homooligomerization	DUF630; DUF632; Prion	no	0.719606	-0.163887	no	0.890048	0.170772	no	0.782053	0.03407	no	0.198087	0.151267	20
GRMZM2G014902	✓					LHY protein (LOC100281091), mRNA	LHY protein	DNA binding	Myb_DNA-bd; Homeodomain-like; SANT_DNA-bd; Myb-like+DNA-bd_dom_SHAQKYF	no	0.94172	0.0404497	no	0.109958	1.52068	yes	1.38081e-09	0.722477	no	0.134189	-0.165514	17
GRMZM2G105863	✓					LOC100277220 (umc1135), mRNA	LOC100277220;LOC100277220;LOC100277220	NA	SibA	yes	4.0407e-11	-1.53574	yes	2.88704e-12	-1.72348	no	0.804102	0.0493701	no	0.100629	0.120085	8
GRMZM2G013960	✓					NA	NA	transcription factor activity;structural constituent of ribosome;intracellular;nucleus;ribosome;translation;multicellular organismal development;zinc ion binding	Znf_C2H2; Ribosomal_P2; Otx1_TF	yes	2.18182e-05	-1.38914	yes	0.0145664	-1.44101	no	1	-0.82931	no	1	-0.0588384	8
GRMZM2G058531	✓					hypothetical protein LOC100273151 (LOC100273151), mRNA	hypothetical protein LOC100273151	protein binding;signal transducer activity;protein binding;response to light stimulus;signal transducer activity;protein binding;response to light stimulus;protein binding;signal transducer activity;protein binding;response to light stimulus	NPH3; BTB/POZ_fold; BTB/POZ-like	yes	0.00199485	-0.596486	yes	2.10817e-05	-1.50765	no	0.552554	-0.0947319	no	0.97048	0.118112	19
GRMZM2G087628	✓					hypothetical protein LOC100193118 (LOC100193118), mRNA	hypothetical protein LOC100193118;hypothetical protein LOC100193118	RNA binding;RNA binding	Rbsml_prot_S1_RNA-bd_dom; NA-bd_OB-fold-like	no	0.403414	-0.331829	no	0.978957	0.0167085	no	0.991823	0.0180668	no	1.09019	0.102644	NA
GRMZM2G028570	✓					NA	NA	transporter activity;transport;membrane;integral to membrane;substrate-specific transmembrane transporter activity;transmembrane transport	Sub_transporter; MFS_general_subst_transpt; Sugar_transporter_CS; Sugar/inositol_transpt	no	1	-0.0367231	no	1	-0.863826	no	1	-0.119082	no	1	-0.204063	NA
GRMZM2G416308	✓					hypothetical protein LOC100279274 (LOC100279274), mRNA	hypothetical protein LOC100279274	protein kinase activity;protein serine/threonine kinase activity;structural constituent of cell wall;ATP binding;protein amino acid phosphorylation;protein kinase activity;protein serine/threonine kinase activity;structural constituent of cell wall;ATP binding;protein amino acid phosphorylation	Se/Thr_prot_kinase-like_dom; Ser-Thr/Tyr-Pkinase; Kinase-like_dom; Tyr_Pkinase_cat_dom; Ser/Thr_prot_kinase_dom; Pistil_extensin; Protein_kinase_ATP_BS; Ser/Thr_prot_kinase_AS	no	0.207902	0.343403	no	0.063796	0.826387	yes	0.0199339	-0.255901	no	1.12242	-0.0627041	NA
GRMZM2G341658		✓				hypothetical protein LOC100192049 (LOC100192049), mRNA	hypothetical protein LOC100192049	NA	MACPF; MAC_perforin	no	1	-1.38932	no	0.713824	-0.321309	no	1	1.32633	no	1	1.25747	NA
GRMZM2G078090		✓				NA	NA	DNA binding;ligand-dependent nuclear receptor activity;nucleus;regulation of transcription, DNA-dependent	NOR1_rcpt	no	0.929956	-0.0514334	no	0.298071	0.670603	yes	0.0463039	0.24094	no	1.10905	-0.0536518	18
GRMZM5G832994		✓				hypothetical protein LOC100278855 (LOC100278855), mRNA	hypothetical protein LOC100278855	NA	DUF778	no	0.707046	0.226602	no	0.186884	0.877429	yes	0.0345631	0.376702	no	1.00642	0.00134427	NA
GRMZM2G403763		✓				NA	NA	NA	NA	no	1	1.79769e+308	no	1	1.79769e+308	no	1	0.193011	no	1	0.270143	NA
GRMZM2G125656		✓				NA	NA	protein phosphatase type 2A complex;signal transduction;protein phosphatase type 2A regulator activity	WD40_repeat_sg; WD40_repeat-like_dom; WD40_repeat; WD40_repeat_CS; G-protein_beta_WD-40_rep_reg	no	0.866513	0.134763	no	0.118844	1.05635	no	0.979297	-0.0146779	no	1.01147	0.0044643	2
GRMZM2G175574		✓				hypothetical protein LOC100381393 (LOC100381393), mRNA;hypothetical protein LOC100304185 (LOC100304185), mRNA	hypothetical protein LOC100381393	NA	NA	no	0.96356	-0.036195	no	0.251064	0.658508	no	0.751322	-0.103548	no	1.09933	0.0730388	NA
GRMZM2G132367		✓				homeodomain-leucine zipper transcription factor TaHDZipI-1 (LOC100283435), mRNA	homeodomain-leucine zipper transcription factor TaHDZipI-1;homeodomain-leucine zipper transcription factor TaHDZipI-1	DNA binding;transcription factor activity;nucleus;regulation of transcription, DNA-dependent;transcription regulator activity;sequence-specific DNA binding;DNA binding;transcription factor activity;nucleus;regulation of transcription, DNA-dependent;transcription regulator activity;sequence-specific DNA binding	Homeobox; Leu_zip_homeo; Homeodomain-like; HTH_lambrepressr; Homeobox_region; Homeobox_CS	yes	0.000139568	-0.954349	yes	2.52433e-11	-2.14296	yes	0.00586271	-0.250785	yes	0.000981509	-0.323198	12
GRMZM2G159456		✓				DNA binding protein (LOC100283388), mRNA	DNA binding protein	nucleus;transcription regulator activity;regulation of transcription	HLH_DNA-bd; HLH_DNA-bd_dom	no	1	0.182846	no	1	-0.802968	no	1	-0.0688307	no	1	0.759931	NA
GRMZM2G056231		✓				hypothetical protein LOC100273753 (LOC100273753), mRNA	hypothetical protein LOC100273753	nucleosome;DNA binding;nucleus;nucleosome assembly	Histone_core_D; Histone-fold; Histone_H2A	no	0.850068	-0.197584	no	0.175911	-1.01356	no	0.0548697	-0.143082	no	0.493859	0.114246	11
GRMZM2G104769		✓				LOC100273449 (TIDP9204), mRNA	LOC100273449	ubiquitin ligase complex;ubiquitin-protein ligase activity;protein ubiquitination	TPR-1; Ubox_domain; TPR_repeat	no	0.99013	-0.0157759	no	0.158204	0.922639	no	0.857183	0.0603453	no	1.04038	0.0250775	14
GRMZM2G000071		✓				NA	NA	electron carrier activity;iron-sulfur cluster binding	Ferredoxin; 2Fe2S_fd_BS	no	1	-3.36088	no	1	-1.66695	no	1	0	no	1	0	NA
GRMZM2G000158		✓				IAA20 - auxin-responsive Aux/IAA family member (LOC100282670), mRNA	IAA20 - auxin-responsive Aux/IAA family member	nucleus;regulation of transcription;nucleus;regulation of transcription;nucleus;regulation of transcription;nucleus;regulation of transcription	AUX_IAA	yes	0.00155913	-0.886367	no	0.242354	-0.438629	no	0.92766	-0.107475	no	1.12435	0.33153	4
GRMZM2G023119		✓				hypothetical protein LOC100276144 (LOC100276144), mRNA	NA	NA	NA	no	1	1.79769e+308	no	1	1.4319	no	1	-0.244644	no	1	0.0316107	NA
GRMZM2G119219		✓				stem-specific protein TSJT1 (LOC100283989), mRNA	stem-specific protein TSJT1	NA	NA	no	0.162897	-0.738363	no	0.0942993	-0.502002	yes	0.000362705	0.212437	yes	5.43921e-10	-0.331775	4
GRMZM5G858456		✓				fucosyltransferase 7 (LOC100281049), mRNA	fucosyltransferase 7	galactoside 2-alpha-L-fucosyltransferase activity;membrane;cell wall biogenesis	XG_FTase	no	1	1.79769e+308	no	1	-4.10231	no	1	-0.0743641	no	1	-0.0163435	NA
GRMZM2G070849		✓				hypothetical protein LOC100274036 (LOC100274036), mRNA	hypothetical protein LOC100274036	DNA binding;ligand-dependent nuclear receptor activity;nucleus;regulation of transcription, DNA-dependent	Myb_DNA-bd; Homeodomain-like; SANT_DNA-bd; NOR1_rcpt	no	0.904792	-0.0792761	no	0.176264	0.85036	no	1	-1.79769e+308	no	1	-0.252459	7
GRMZM2G365961		✓				arogenate dehydrogenase (LOC100281078), mRNA	arogenate dehydrogenase	prephenate dehydrogenase (NADP+) activity;tyrosine biosynthetic process	Prephen_DH	no	0.0741242	-0.596919	yes	0.0170659	-1.31373	no	0.884651	-0.0536503	no	1.02233	0.0162531	9
GRMZM2G080825		✓				NA	NA	gamma-glutamyltransferase activity;metabolic process;methyltransferase activity	Methyltransf_11; Methyltransf_12; GGT_peptidase	no	1	0.122125	no	1	0	no	1	-1.79769e+308	no	1	0	NA
AC199873.4_FG002		✓				NA	NA	NA	NA	no	0.492086	1.24681	no	1	-0.432482	no	1	0.0825043	no	1	0.0234586	NA
AC191804.4_FG002		✓				NA	NA	NA	NA	no	1	-0.609691	no	1	-0.364935	no	1	0.273763	no	1	0.35726	NA
GRMZM2G147619		✓				SET domain-containing protein SET102 (SET102), mRNA	SET domain-containing protein SET102	nucleus;histone-lysine N-methyltransferase activity;nucleus;histone-lysine N-methyltransferase activity;nucleus;histone-lysine N-methyltransferase activity	SET_dom; AWS; Post-SET_dom	no	0.412659	0.248353	no	0.0930113	0.826776	no	0.67006	-0.0909941	no	1.12753	-0.0492323	NA
GRMZM2G069317		✓				hypothetical protein LOC100381689 (LOC100381689), mRNA	hypothetical protein LOC100381689	NA	NA	no	0.104349	-0.744564	no	0.920782	-0.0738203	no	0.900631	0.0713242	no	1.01742	-0.222089	20
GRMZM2G089406		✓				hypothetical protein LOC100279451 (LOC100279451), mRNA	hypothetical protein LOC100279451	DNA binding;histamine receptor activity;G-protein coupled receptor protein signaling pathway;integral to membrane	NA	no	0.474909	-0.2011	no	0.143021	0.852608	no	0.121702	0.118635	no	1.02966	0.0075486	NA
GRMZM2G320287		✓				NA	NA	intracellular;zinc ion binding	Znf_C2H2; Znf_C2H2-like	no	1	0	no	1	0	no	1	-1.79769e+308	no	1	1.79769e+308	NA
GRMZM2G084684		✓				NA	NA	structural constituent of ribosome;intracellular;ribosome;translation;homoiothermy;ice binding;response to freezing	NA	yes	0.000316574	-1.07225	no	0.282224	-0.598393	no	0.944623	-0.0392121	no	1.10726	-0.191081	15
GRMZM2G132898		✓				choline-phosphate cytidylyltransferase B (LOC100283945), mRNA	choline-phosphate cytidylyltransferase B	catalytic activity;biosynthetic process;nucleotidyltransferase activity	Cytidylyltransf; Cyt_trans_rel	no	0.670972	0.201679	no	0.210368	0.785538	no	0.517117	-0.0911822	no	1.11454	0.0533515	NA
GRMZM2G066700		✓				NA	NA	intracellular;signal transduction	NA	no	1	0	no	1	1.14225	no	1	0	no	1	0	NA
GRMZM2G118628		✓				NA	NA	protein kinase activity;protein serine/threonine kinase activity;ATP binding;protein amino acid phosphorylation	Se/Thr_prot_kinase-like_dom; Ser-Thr/Tyr-Pkinase; Kinase-like_dom; Reg_csome_cond/b-lactamase_inh; Tyr_Pkinase_cat_dom; Ser/Thr_prot_kinase_dom; Protein_kinase_ATP_BS; Ser/Thr_prot_kinase_AS	no	0.427356	-0.392114	yes	0.000192175	-1.91589	no	0.978557	0.0259794	no	1.04464	-0.0544634	12
GRMZM5G881123		✓				NA	NA	NA	NA	no	1	-2.34345	no	1	0.69582	no	1	1.79769e+308	no	1	-1.79769e+308	NA
AC187551.3_FG002		✓				NA	NA	NA	Pentatricopeptide_repeat	no	0.451527	-0.302462	no	0.447429	0.482045	no	0.568831	0.110649	no	1.0509	-0.0308612	17
GRMZM2G054123		✓				hypothetical protein LOC100194360 (LOC100194360), mRNA;S-adenosylmethionine synthetase 1 (LOC100282324), mRNA	S-adenosylmethionine synthetase 1;S-adenosylmethionine synthetase 1;S-adenosylmethionine synthetase 1;S-adenosylmethionine synthetase 1;S-adenosylmethionine synthetase 1	methionine adenosyltransferase activity;ATP binding;one-carbon metabolic process;methionine adenosyltransferase activity;ATP binding;one-carbon metabolic process;methionine adenosyltransferase activity;ATP binding;one-carbon metabolic process;methionine adenosyltransferase activity;ATP binding;one-carbon metabolic process;methionine adenosyltransferase activity;ATP binding;one-carbon metabolic pr…	S-AdoMet_synt_N; S-AdoMet_synt_central; S-AdoMet_synt_C; S-AdoMet_synthetase_sfam; ADOMET_SYNTHASE_CS; S-AdoMet_synthetase	no	0.896958	-0.321903	no	0.211792	-1.33965	no	0.281298	0.0843774	no	0.725377	-0.0865846	12
GRMZM2G702064		✓				NA	NA	NA	NA-bd_OB-fold-like	no	1	0	no	1	0	no	1	0	no	1	0	NA
GRMZM2G703807		✓				NA	NA	NA	NA	no	0.275733	-0.72826	no	0.426459	-0.610666	no	0.513436	0.305391	no	0.78087	0.680675	NA
GRMZM2G015033		✓				hypothetical protein LOC100276178 (LOC100276178), mRNA	hypothetical protein LOC100276178	NA	NA	no	0.980727	0.0182554	no	0.481679	0.410986	no	0.930098	-0.0288792	no	1.08547	-0.139634	13
GRMZM2G431114		✓				hypothetical protein LOC100276469 (LOC100276469), mRNA	NA	protein binding;protein binding	LRR-contain_N2; Leu-rich_rpt	no	1	0.0881351	no	0.28595	1.07031	no	0.380082	-0.438111	no	1.08301	-0.161682	NA
GRMZM2G110483		✓				NA	NA	acyl-CoA dehydrogenase activity;G-protein coupled receptor protein signaling pathway;blood coagulation;thrombin receptor activity;integral to membrane;oxidation reduction	Pentatricopeptide_repeat; Acyl-CoA_DH_CS; Prot_act_rcpt_4	no	0.723094	0.232451	no	0.158988	0.968397	no	0.572473	0.155475	no	1.11701	0.18066	1
GRMZM2G476538		✓				hypothetical protein LOC100191730 (LOC100191730), mRNA	hypothetical protein LOC100191730	metabolic process;hydrolase activity;metabolic process;hydrolase activity;protein binding;metabolic process;hydrolase activity;protein binding;metabolic process;hydrolase activity;protein binding;metabolic process;hydrolase activity;metabolic process;hydrolase activity	Peptidase_M20; Pept_M20D_amidohydro	yes	0.0345066	-0.59905	yes	0.0111653	-1.08899	no	0.972823	-0.052297	yes	0.00039645	-0.795548	12
GRMZM2G093449		✓				NA	NA	NA	NA	no	1	0	no	1	-1.79769e+308	no	1	0	no	1	0	NA
GRMZM2G473511		✓				NA	NA	protein kinase activity;protein serine/threonine kinase activity;ATP binding;protein amino acid phosphorylation	Se/Thr_prot_kinase-like_dom; Ser-Thr/Tyr-Pkinase; Kinase-like_dom; Tyr_Pkinase_cat_dom; Ser/Thr_prot_kinase_dom; Protein_kinase_ATP_BS; Ser/Thr_prot_kinase_AS	no	1	1.17094	no	0.277325	0.963659	no	0.596942	0.272138	no	1.12201	0.179349	NA
GRMZM2G133966		✓				NA	NA	catalytic activity;trehalose biosynthetic process;homoiothermy;ice binding;response to freezing	Glyco_trans_20; Antifreeze_1	no	0.822611	0.126737	no	0.387709	-0.532451	no	0.0908077	0.208087	no	0.152201	0.299675	2
GRMZM2G348780		✓				NA	NA	NA	NA	no	1	1.79769e+308	no	1	1.79769e+308	no	1	1.79769e+308	no	1	0	NA
GRMZM2G057067		✓				LOC100283620 (cl8808_2), mRNA	LOC100283620;LOC100283620	nucleus;regulation of transcription;nucleus;regulation of transcription;nucleus;regulation of transcription;nucleus;regulation of transcription	AUX_IAA	no	0.149286	-0.493975	no	0.148978	-0.696616	no	0.942864	0.0503987	no	1.12821	-0.110402	12
GRMZM2G108772		✓				NA	NA	NA	NA	no	1	-0.949621	no	1	-0.0955737	no	1	0.433321	no	1	-0.390838	NA
GRMZM2G398458		✓				NA	NA	NA	TPR-1; TPR_2; TPR_repeat	no	1	1.09464	no	0.252334	1.07821	no	0.896229	-0.0584906	no	1.02303	0.017719	NA
GRMZM2G138349		✓				hypothetical protein LOC100382772 (LOC100382772), mRNA	hypothetical protein LOC100382772;hypothetical protein LOC100382772	ARF GTPase activator activity;zinc ion binding;regulation of ARF GTPase activity;ARF GTPase activator activity;zinc ion binding;regulation of ARF GTPase activity;ARF GTPase activator activity;zinc ion binding;regulation of ARF GTPase activity;ARF GTPase activator activity;zinc ion binding;regulation of ARF GTPase activity	C2_Ca-dep; C2_Ca/lipid-bd_dom_CaLB; ArfGAP; C2_region	no	0.294725	0.605853	no	0.284809	0.550327	no	0.780547	0.150127	no	1.12813	0.140786	16
GRMZM2G141679		✓				NA	NA	DNA binding;transcription factor activity;regulation of transcription, DNA-dependent	TF_ERF_DNA-bd; DNA-bd_integrase-typ	no	0.942653	-0.153879	no	0.286266	-1.14365	no	0.204225	0.111601	no	1.09616	-0.0299251	NA
GRMZM2G104204		✓				NA	NA	transcription factor activity;nucleus;regulation of transcription, DNA-dependent;sequence-specific DNA binding	Homeobox; Homeodomain-like; HTH_lambrepressr	no	0.137703	-0.522354	no	0.122026	-0.785427	no	0.0681954	0.444088	yes	0	-1.88765	12
GRMZM2G375222		✓				NA	NA	transcription elongation regulator activity;positive regulation of RNA elongation from RNA polymerase II promoter;membrane;protein homooligomerization	Prion	yes	0.00285869	-0.645048	no	0.0878362	0.480969	yes	0.0205553	0.178505	no	1.07777	0.0213086	15
AC233850.1_FG009		✓				hypothetical protein LOC100273545 (LOC100273545), mRNA	hypothetical protein LOC100273545	NA	NA	no	0.168886	-0.684267	no	0.379101	-0.54395	no	0.271231	-0.182694	no	1.03715	-0.031807	9
AC209723.3_FG004		✓				NA	NA	NA	NA	no	1	0	no	1	0	no	1	0	no	1	0	NA
GRMZM5G842877		✓				NA	NA	NA	NA	no	1	-0.0471233	no	1	-0.435214	no	1	0.370644	no	1	-1.27625	NA
GRMZM2G007871		✓				hypothetical protein LOC100384319 (LOC100384319), mRNA;hypothetical protein LOC100384319 (LOC100384319), mRNA	NA	protein folding;heat shock protein binding;unfolded protein binding;protein folding;heat shock protein binding;unfolded protein binding	DnaJ_N; Hsp_DnaJ	no	0.550274	-0.223616	no	0.31284	0.60802	no	0.82977	0.0371132	no	1.12487	-0.0566019	NA
GRMZM2G310410		✓				hypothetical protein LOC100383603 (LOC100383603), mRNA	hypothetical protein LOC100383603	protein kinase activity;protein serine/threonine kinase activity;ATP binding;protein amino acid phosphorylation	Ser-Thr/Tyr-Pkinase; Kinase-like_dom; Tyr_Pkinase_cat_dom; Ser/Thr_prot_kinase_dom	no	1	-0.0159811	no	0.258357	0.881362	no	0.123625	0.408816	no	0.916889	0.328598	17
GRMZM2G034877		✓				NA	NA	protein kinase activity;protein serine/threonine kinase activity;ATP binding;protein amino acid phosphorylation	Se/Thr_prot_kinase-like_dom; Ser-Thr/Tyr-Pkinase; Kinase-like_dom; Tyr_Pkinase_cat_dom; Ser/Thr_prot_kinase_dom; Protein_kinase_ATP_BS; Ser/Thr_prot_kinase_AS	no	0.953429	0.0873192	yes	0.0391719	2.55946	no	0.983432	-0.0270875	no	1.01223	0.0199266	14
GRMZM2G086267		✓				LOC100282506 (pco067337), mRNA	LOC100282506	NA	NA	no	0.70553	-0.152597	no	0.155067	0.779032	no	0.372206	-0.133535	no	1.07329	-0.0358781	13
GRMZM5G861756		✓				NA	NA	GTP binding	AIG1; Toc86_159	no	0.194851	0.602203	no	0.111721	1.09962	yes	6.01133e-05	0.515397	no	1.12405	0.107248	2
GRMZM2G148277		✓				NA	NA	metabolic process;transferase activity, transferring hexosyl groups	UDP_glucos_trans	no	1	0	no	1	0	no	1	-1.1995	no	1	-0.68582	NA
GRMZM2G094189		✓				hypothetical protein LOC100192622 (LOC100192622), mRNA	hypothetical protein LOC100192622	NA	F-box_dom_Skp2-like; F-box_dom_cyclin-like	no	1	0	no	1	0	no	1	0	no	1	0	NA
GRMZM5G866269		✓				hypothetical protein LOC100217310 (LOC100217310), mRNA	hypothetical protein LOC100217310	NA	NA	no	1	-1.04768	no	1	-0.254088	no	1	0.436518	no	1	-0.117527	NA
GRMZM2G067320		✓				NA	NA	NA	Leu-rich_rpt_2; FBD; F-box_dom_Skp2-like; Leu-rich_rpt_Cys-con_subtyp; FBD-like	no	1	-0.742265	no	1	-1.41978	no	1	0.868589	no	1	0.715847	NA
AC190695.3_FG003		✓				NA	NA	NA	NA	no	1	0	no	1	0	no	1	0	no	1	0	NA
GRMZM2G079619		✓				NA	NA	monooxygenase activity;iron ion binding;electron carrier activity;heme binding;oxidation reduction	Cyt_P450; Cyt_P450_E_grp-I; Cyt_P450_E_grp-IV; Cyt_P450_CS	no	1	-0.790901	no	1	-1.04252	no	1	0.504091	no	1	-0.40669	NA
GRMZM2G101080		✓				NA	NA	NA	CaM-bd_prot_pln	no	0.537134	-0.396841	no	0.276224	-0.585498	no	0.899933	-0.0708619	no	1.12511	-0.170517	6
GRMZM2G345544		✓				copine-1 (LOC100281056), mRNA	copine-1;copine-1	protein binding;zinc ion binding;protein binding;zinc ion binding	Copine; VWF_A; Znf_RING	no	0.997861	0.00669815	yes	0.024079	1.47795	no	0.774431	0.04914	no	1.05277	0.0221254	18
GRMZM2G116212		✓				NA	NA	NA	NA	no	1	0	no	1	0	no	1	0	no	1	0	NA
GRMZM2G305822		✓				NA	NA	ubiquitin ligase complex;protein kinase activity;protein serine/threonine kinase activity;ubiquitin-protein ligase activity;ATP binding;protein amino acid phosphorylation;protein ubiquitination	Se/Thr_prot_kinase-like_dom; Ser-Thr/Tyr-Pkinase; Ubox_domain; Kinase-like_dom; Tyr_Pkinase_cat_dom; Ser/Thr_prot_kinase_dom; Protein_kinase_ATP_BS; Ser/Thr_prot_kinase_AS	no	0.938491	0.0783852	yes	0.0230843	1.66422	no	0.130775	0.196612	no	0.165083	-0.255277	NA
GRMZM2G176647		✓				NA	NA	NA	NA	no	0.486051	-0.319723	no	0.248551	0.721183	no	0.940511	-0.0207809	no	0.185193	-0.205182	2
GRMZM2G058498		✓				rae1-like protein (LOC100283675), mRNA	rae1-like protein	cysteine-type endopeptidase activity;proteolysis	WD40_repeat_sg; WD40_repeat-like_dom; WD40_repeat; Pept_cys_AS; G-protein_beta_WD-40_rep_reg	no	0.362632	0.375519	no	0.0990892	1.27636	no	0.913202	0.0185122	no	1.04665	0.0172343	18
GRMZM2G117401		✓				hypothetical protein LOC100382371 (LOC100382371), mRNA	hypothetical protein LOC100382371	microtubule motor activity;ATP binding;microtubule-based movement;microtubule motor activity;ATP binding;microtubule-based movement;microtubule motor activity;ATP binding;microtubule-based movement	NA	no	0.999786	-0.00319043	yes	0.0329646	0.937461	yes	0.0457777	-0.139757	no	1.12928	-0.0383474	18
GRMZM5G867030		✓				hypothetical protein LOC100274509 (LOC100274509), mRNA	hypothetical protein LOC100274509	NA	F-box_dom_cyclin-like; F-box_dom_Skp2-like; FBD-like	yes	0.000855273	-0.920624	no	0.0713937	-1.05457	no	0.0615689	0.274823	no	1.11985	-0.104088	19
GRMZM2G019783		✓				hypothetical protein LOC100192871 (LOC100192871), mRNA	hypothetical protein LOC100192871	alpha-L-fucosidase activity;carbohydrate metabolic process;fucose metabolic process	Glyco_hydro_catalytic_core; Galactose-bd-like; Glyco_hydro_29; Glyco_hydro_29_sub	no	0.965002	-0.0266766	no	0.496589	0.444609	no	0.499985	0.116947	no	1.12982	-0.0873704	17
GRMZM2G460472		✓				hypothetical protein LOC100216574 (LOC100216574), mRNA	hypothetical protein LOC100216574	nucleus;transcription regulator activity;regulation of transcription	HLH_DNA-bd; HLH_DNA-bd_dom	no	0.449136	0.297273	no	0.14981	1.02581	no	0.783891	-0.0531408	no	1.02913	-0.104145	17
GRMZM2G033626		✓				NA	26S proteasome non-ATPase regulatory subunit 14;26S proteasome non-ATPase regulatory subunit 14	NA	NA	no	0.411071	0.234672	no	0.281651	0.734397	yes	0.00110695	-0.234948	no	1.02432	-0.00490829	3
GRMZM2G520811		✓				hypothetical protein LOC100192731 (LOC100192731), mRNA	NA	NA	NA	no	0.410404	-0.516008	yes	0.0491398	-1.26814	yes	5.34092e-05	-0.606134	no	1.12037	-0.0813207	9
GRMZM2G464263		✓				NA	NA	NA	NA	no	0.627948	-0.302974	no	0.240023	-0.712977	no	0.188252	0.361623	no	0.66029	0.312875	16
GRMZM5G891036		✓				NA	NA	NA	NA	no	1	0	no	1	-0.640295	no	1	1.13909	no	1	0.159501	NA
GRMZM2G329636		✓				NA	ATPase subunit 6;ATPase subunit 6	hydrogen ion transmembrane transporter activity;ATP synthesis coupled proton transport;proton-transporting ATP synthase complex, coupling factor F(o);hydrogen ion transmembrane transporter activity;ATP synthesis coupled proton transport;proton-transporting ATP synthase complex, coupling factor F(o);hydrogen ion transmembrane transporter activity;ATP synthesis coupled proton transport;proton-trans…	ATPase_F0-cplx_asu	no	1	1.49333	no	0.556896	0.457802	no	0.920804	0.0610149	yes	0.0104113	-0.736945	14
GRMZM2G030305		✓				NA	NA	protein kinase activity;protein serine/threonine kinase activity;MAP kinase activity;ATP binding;protein amino acid phosphorylation;protein kinase activity;protein serine/threonine kinase activity;MAP kinase activity;ATP binding;protein amino acid phosphorylation;protein kinase activity;protein serine/threonine kinase activity;MAP kinase activity;ATP binding;protein amino acid phosphorylation	Kinase-like_dom; Tyr_Pkinase_cat_dom; Ser/Thr_prot_kinase_dom; Protein_kinase_ATP_BS; Erk_3_4_MAPK	no	0.0783372	0.611951	no	0.082507	0.892687	no	0.259505	-0.19067	no	0.164928	-0.203689	12
GRMZM2G703173		✓				NA	NA	NA	NA	no	1	0	no	1	0	no	1	0	no	1	0	NA
GRMZM2G117060		✓				NA	NA	nucleic acid binding;DNA binding;helicase activity;ATP binding;DNA binding;ATP binding	SNF2_N; DEAD-like_N	yes	0.0499245	0.709106	no	0.119552	1.00169	no	0.987464	-0.00700607	no	1.0084	-0.00144617	2
GRMZM5G849471		✓				NA	NA	protein kinase activity;protein serine/threonine kinase activity;ATP binding;protein amino acid phosphorylation	Se/Thr_prot_kinase-like_dom; Ser-Thr/Tyr-Pkinase; Kinase-like_dom; Tyr_Pkinase_cat_dom; Ser/Thr_prot_kinase_dom; Ser/Thr_prot_kinase_AS	no	1	-1.18254	no	1	-1.07533	no	1	-0.1941	no	1	0.0947939	NA
GRMZM2G111146		✓				hypothetical protein LOC100272406 (LOC100272406), mRNA	hypothetical protein LOC100272406	nucleus;transcription regulator activity;regulation of transcription;nucleus;transcription regulator activity;regulation of transcription;nucleus;transcription regulator activity;regulation of transcription	HLH_DNA-bd_dom; HLH_DNA-bd	yes	9.44756e-07	-0.985177	yes	3.58959e-09	-1.75967	no	0.619987	-0.0736226	no	0.284779	0.162143	16
GRMZM2G115895		✓				NA	NA	NA	NA	no	1	1.79769e+308	no	1	-0.955193	no	1	0.91666	no	1	-0.177236	NA
GRMZM5G847020		✓				NA	NA	NA	NA	no	1	-1.79769e+308	no	1	1.79769e+308	no	1	0	no	1	0	NA
GRMZM2G140561		✓				hypothetical protein LOC100273041 (LOC100273041), mRNA	hypothetical protein LOC100273041	NA	NA	yes	0.0273293	-1.27021	no	0.0610191	-1.36894	no	1	-0.664057	no	1	0.0316131	8
GRMZM2G028677			✓			trans-cinnamate 4-monooxygenase (LOC100284998), mRNA	trans-cinnamate 4-monooxygenase	monooxygenase activity;iron ion binding;electron carrier activity;heme binding;oxidation reduction	Cyt_P450; Cyt_P450_CS; Cyt_P450_E_grp-I; Cyt_P450_E_grp-IV; Cyt_P450_B	no	1	0.912183	no	1	1.42087	no	1	1.28191	yes	6.40161e-06	-0.822445	13
GRMZM2G051949			✓			hypothetical protein LOC100384486 (LOC100384486), mRNA	NA	catalytic activity;transporter activity;transport;nucleoside metabolic process;membrane;transmembrane transport;transporter activity;transport;membrane;transmembrane transport;transporter activity;transport;membrane;transmembrane transport	Sugar_transporter_CS	no	0.715451	-0.287217	no	0.681215	-0.291654	no	0.85467	0.170352	no	0.687695	-0.798391	12
GRMZM2G364328			✓			mtN21 nodulin protein-like (LOC100282848), mRNA	mtN21 nodulin protein-like	membrane	DMT	no	1	0	no	1	0	no	1	-1.79769e+308	no	1	0	NA
GRMZM2G122277			✓			hypothetical protein LOC100382337 (LOC100382337), mRNA;hypothetical protein LOC100382337 (LOC100382337), mRNA	hypothetical protein LOC100382337;hypothetical protein LOC100382337	membrane;cellulose synthase (UDP-forming) activity;cellulose biosynthetic process;membrane;cellulose synthase (UDP-forming) activity;cellulose biosynthetic process	Cellulose_synth	no	0.773946	-0.0981979	yes	0.0147513	-0.823844	no	0.284191	-0.22363	no	0.162457	-0.225291	12
GRMZM2G302045			✓			LOC100193372 (gpm184), mRNA	LOC100193372	NA	NA	no	1	0	yes	0.00902949	-2.67367	no	0.915523	0.178751	no	1.10357	-0.317787	12
GRMZM5G840909			✓			hypothetical protein LOC100272576 (LOC100272576), mRNA	hypothetical protein LOC100272576	catalytic activity;zinc ion binding;hydrolase activity;catalytic activity;zinc ion binding;hydrolase activity	NA	no	0.370256	0.459348	yes	0.019225	1.44768	no	0.445486	-0.117868	no	1.04572	0.0206008	17
GRMZM2G179779			✓			NA	NA	NA	NA	no	1	0	no	1	0	no	1	0	no	1	0	NA
GRMZM2G060837			✓			hypothetical protein LOC100191978 (LOC100191978), mRNA	hypothetical protein LOC100191978	hydrolase activity, hydrolyzing O-glycosyl compounds;vasopressin receptor activity;cell wall;carbohydrate metabolic process;cellular glucan metabolic process;G-protein coupled receptor protein signaling pathway;integral to membrane;xyloglucan:xyloglucosyl transferase activity;apoplast;hydrolase activity, hydrolyzing O-glycosyl compounds;carbohydrate metabolic process;hydrolase activity, hydrolyzi…	Glyco_hydro_16; XET_C; ConA-like_lec_gl; XET; Vprsn_rcpt_V2	no	0.157486	-0.363016	yes	3.21194e-12	-2.14411	no	0.493402	-0.190924	no	1.04861	-0.029805	NA
GRMZM2G455330			✓			NA	NA	NA	NA	no	1	0	no	1	0	no	1	-1.79769e+308	no	1	0	NA
GRMZM2G134862			✓			hypothetical protein LOC100272490 (LOC100272490), mRNA	hypothetical protein LOC100272490	structural constituent of ribosome;intracellular;ribosome;translation;sequence-specific DNA binding;structural constituent of ribosome;intracellular;ribosome;translation;sequence-specific DNA binding	Translin; Ribosomal_P2	no	0.384783	-0.284856	no	0.783112	0.210071	no	0.215857	-0.110333	no	1.02432	0.00659302	NA
GRMZM2G022904			✓			NA	NA	monooxygenase activity;iron ion binding;electron carrier activity;heme binding;oxidation reduction;monooxygenase activity;iron ion binding;electron carrier activity;heme binding;oxidation reduction	Cyt_P450; Cyt_P450_E_grp-II; Cyt_P450_E_grp-I	no	0.530018	0.448981	yes	0.0279974	-1.44849	no	1	1.19192	no	1	0.541407	7
GRMZM5G847230			✓			NA	NA	NA	NA	no	1	1.79769e+308	no	1	-0.771534	no	1	0.198868	no	1.00806	-0.00614357	NA
GRMZM2G053999			✓			NA	NA	biosynthetic process;transferase activity, transferring nitrogenous groups;1-aminocyclopropane-1-carboxylate synthase activity;pyridoxal phosphate binding	Aminotransferase_I/II; PyrdxlP-dep_Trfase_major_dom; ACC_synthase	no	0.119873	0.540128	no	0.105271	1.20724	no	0.364762	-0.0852064	no	1.04547	-0.0754158	NA
AC232289.2_FG009			✓			NA	NA	NA	NA	no	1	0	no	1	0	no	1	0	no	1	0	NA
GRMZM2G120371			✓			G protein-coupled receptor (LOC100280504), mRNA	G protein-coupled receptor	G-protein coupled receptor activity;G-protein coupled receptor protein signaling pathway;integral to membrane;cAMP binding	GPCR_cAMP	no	0.689774	-0.228839	no	0.323496	0.628751	no	0.572137	0.105829	no	1.03286	0.0177548	NA
GRMZM2G467717			✓			NA	NA	binding;binding;binding	ARM-type_fold	no	0.480465	0.264116	yes	0.0412852	0.868426	no	0.309614	-0.139093	no	1.08816	-0.0352233	17
GRMZM2G381378			✓			NA	NA	transcription factor activity;sequence-specific DNA binding;regulation of transcription	WRKY_DNA-bd	no	1	-0.239437	no	1	-0.884828	no	1	1.79769e+308	no	1	-0.435764	12
GRMZM2G053939			✓			NA	NA	homoiothermy;ice binding;response to freezing	Antifreeze_1	no	0.235682	-0.406515	yes	0.0376117	-1.08906	no	0.291199	-0.129944	no	1.10264	-0.0481766	2
GRMZM2G035636			✓			NA	NA	aspartic-type endopeptidase activity;lysosome;proteolysis;lipid metabolic process;sphingolipid metabolic process	Peptidase_A1; WD40_repeat_sg; SapB_2; SapB_1; Peptidase_aspartic; WD40_repeat-like_dom; WD40_repeat; SaposinB; Peptidase_aspartic_AS; Saposin	no	0.771436	0.179039	no	0.103165	1.05508	no	0.727098	-0.167842	no	1.00537	-0.000246607	NA
GRMZM2G353726			✓			NA	NA	protein kinase activity;protein serine/threonine kinase activity;calcium ion binding;ATP binding;sugar binding;protein amino acid phosphorylation;recognition of pollen	B_lectin_man-bd; S_locus_glycoprot; PAN-2_domain; Se/Thr_prot_kinase-like_dom; Ser-Thr/Tyr-Pkinase; Kinase-like_dom; EGF_Ca-bd; Pan_app; Tyr_Pkinase_cat_dom; Ser/Thr_prot_kinase_dom; Protein_kinase_ATP_BS; Ser/Thr_prot_kinase_AS	no	1	0	no	1	0	no	1	-1.06363	no	1	0	NA
GRMZM2G180160			✓			NA	NA	protein kinase activity;protein serine/threonine kinase activity;calcium ion binding;ATP binding;protein amino acid phosphorylation	Se/Thr_prot_kinase-like_dom; Ser-Thr/Tyr-Pkinase; Kinase-like_dom; EGF-like; EGF_Ca-bd; Tyr_Pkinase_cat_dom; Ser/Thr_prot_kinase_dom; EGF-type_Asp/Asn_hydroxyl_site; Ser/Thr_prot_kinase_AS; EGF_Ca-bd_CS	no	1	0	no	1	0	no	1	-1.79769e+308	no	1	0	NA
GRMZM2G005433			✓			hypothetical protein LOC100384501 (LOC100384501), mRNA	NA	oxygen evolving complex;photosynthesis;membrane;oxygen evolving complex;photosynthesis;membrane	PSII_Psb28_class-1	no	0.646293	-0.21201	no	0.170344	-0.595826	no	0.420262	0.30106	no	1.11698	0.12111	19
GRMZM2G054905			✓			NA	NA	catalytic activity;metalloendopeptidase activity;proteolysis;zinc ion binding;metal ion binding	Pept_M16_N; Peptidase_M16_C; Metalloenz_metal-bd; Pept_M16_Zn_BS	no	0.771498	0.185964	no	0.0536488	1.3572	no	0.230027	0.150889	no	0.742116	-0.166944	NA
GRMZM2G180430			✓			DNA-binding protein phosphatase 2C (LOC100283033), mRNA;LOC100191216 (IDP141), mRNA	LOC100191216;DNA-binding protein phosphatase 2C;LOC100191216;DNA-binding protein phosphatase 2C	catalytic activity;catalytic activity;catalytic activity	PP2C_N; PP2C-related	no	0.482413	-0.227303	no	0.97369	-0.0231863	no	0.923614	-0.046639	no	0.755521	0.209517	4
GRMZM5G879527			✓			hypothetical protein LOC100279237 (LOC100279237), mRNA;DNA binding protein (LOC100281520), mRNA	hypothetical protein LOC100279237;hypothetical protein LOC100279237;DNA binding protein;hypothetical protein LOC100279237	nucleus;transcription regulator activity;regulation of transcription;nucleus;transcription regulator activity;regulation of transcription;nucleus;transcription regulator activity;regulation of transcription;nucleus;transcription regulator activity;regulation of transcription	HLH_DNA-bd_dom; HLH_DNA-bd	yes	0.0119582	-0.638949	yes	0.00297806	-1.04392	no	0.322471	-0.366174	no	1.12939	-0.082797	19
GRMZM2G175089			✓			hypothetical protein LOC100273210 (LOC100273210), mRNA	hypothetical protein LOC100273210	protein folding;heat shock protein binding;unfolded protein binding;protein folding;heat shock protein binding;unfolded protein binding;protein folding;heat shock protein binding;unfolded protein binding	NA	no	0.402728	0.278064	yes	0.0123626	0.850789	no	0.745487	-0.0743306	no	1.11812	-0.0688991	NA
GRMZM2G110500			✓			mediator complex subunit 10 CG5057-PA (LOC100283957), mRNA	mediator complex subunit 10 CG5057-PA;mediator complex subunit 10 CG5057-PA	regulation of transcription from RNA polymerase II promoter;RNA polymerase II transcription mediator activity;mediator complex;regulation of transcription from RNA polymerase II promoter;RNA polymerase II transcription mediator activity;mediator complex	Mediator_Med10	no	0.364092	0.320768	no	0.20217	0.770704	no	0.928959	-0.0189599	no	1.00875	-0.00188433	10
GRMZM2G005236			✓			NA	NA	nucleic acid binding;nucleic acid binding;nucleic acid binding	RRM_RNP1; RNA-recognition_dom1	no	0.134822	0.357983	yes	0.00925825	1.29703	no	0.102583	0.15373	yes	0.00877584	-0.201997	17
GRMZM2G025552			✓			cell growth defect factor 2 (LOC100280955), mRNA	cell growth defect factor 2	NA	NA	no	0.398685	-0.453349	no	0.53874	0.390079	no	0.176218	0.293856	no	1.12532	0.13485	13
GRMZM2G700903			✓			NA	NA	NA	NA	no	1	0	no	1	0	no	1	0	no	1	0	NA
GRMZM2G165348			✓			NA	NA	protein kinase activity;protein serine/threonine kinase activity;ATP binding;protein amino acid phosphorylation	Se/Thr_prot_kinase-like_dom; Ser-Thr/Tyr-Pkinase; Kinase-like_dom; Tyr_Pkinase_cat_dom; Ser/Thr_prot_kinase_dom; Protein_kinase_ATP_BS; Ser/Thr_prot_kinase_AS	no	1	0	no	1	0	no	1	0	no	1	0	NA
GRMZM2G010855			✓			hypothetical protein LOC100192073 (LOC100192073), mRNA	hypothetical protein LOC100192073	catalytic activity;protein serine/threonine phosphatase activity;protein amino acid dephosphorylation;protein serine/threonine phosphatase complex;catalytic activity	PP2C-related	no	0.715953	-0.182871	yes	1.65142e-10	-2.38419	no	0.466648	-0.0988863	no	1.04364	-0.151385	15
GRMZM2G023289			✓			phosphoglucomutase 2 (LOC542358), mRNA	phosphoglucomutase 2	magnesium ion binding;carbohydrate metabolic process;intramolecular transferase activity, phosphotransferases;carbohydrate metabolic process;intramolecular transferase activity, phosphotransferases;magnesium ion binding;carbohydrate metabolic process;intramolecular transferase activity, phosphotransferases	A-D-PHexomutase_a/b/a-I; A-D-PHexomutase_a/b/a-II; A-D-PHexomutase_a/b/a-III; A-D-PHexomutase_C; A-D-PHexomutase_a/b/a-I/II/III; A-D-PHexomutase_CS; Alpha-D-phosphohexomutase	no	0.277475	0.33483	no	0.172728	0.705863	no	0.877207	-0.0197397	no	1.11878	0.0518638	17
GRMZM2G174785			✓			NA	NA	nucleic acid binding;RNA binding;RNA processing;nucleic acid binding;RNA binding;RNA processing	RRM_RNP1; Surp; ENTH_VHS; RNA-recognition_dom1; RNA_polymerase_II_lsu_CTD	no	0.969725	0.0234649	no	0.168089	1.01096	no	0.957315	0.00954675	no	1.08541	-0.0241147	2
GRMZM2G055880			✓			NA	NA	integral to membrane;protein insertion into membrane	NA	no	0.4332	0.337996	yes	0.0159011	1.24598	no	0.267177	0.1158	no	1.12647	0.049613	18
GRMZM2G471970			✓			NA	NA	NA	DUF296	no	1	-1.05192	no	1	-2.50088	no	1	0	no	1	0	NA
GRMZM2G162079			✓			hypothetical protein LOC100279893 (LOC100279893), mRNA	hypothetical protein LOC100279893;hypothetical protein LOC100279893;hypothetical protein LOC100279893;hypothetical protein LOC100279893;hypothetical protein LOC100279893	melanocyte-stimulating hormone receptor activity;G-protein coupled receptor protein signaling pathway;integral to membrane;melanocyte-stimulating hormone receptor activity;G-protein coupled receptor protein signaling pathway;integral to membrane;melanocyte-stimulating hormone receptor activity;G-protein coupled receptor protein signaling pathway;integral to membrane	MFS_general_subst_transpt; MSH_rcpt	no	0.860318	0.0741379	no	0.507067	0.313628	no	0.944956	0.0159646	no	1.09386	0.0411644	NA
AC214534.3_FG010			✓			NA	NA	NA	Pentatricopeptide_repeat	no	0.453409	-0.378504	no	0.921884	0.0756211	no	0.856935	0.0667318	no	1.12395	0.154571	NA
GRMZM2G461648			✓			NA	NA	transcription factor activity;sequence-specific DNA binding;regulation of transcription	WRKY_DNA-bd	no	1	0	no	1	-1.79769e+308	no	1	0	no	1	0	NA
AC207722.2_FG009			✓	lhcb2	light harvesting chlorophyll a/b binding protein2	NA	chlorophyll a-b binding protein 2	NA	Chloroa_b-bind	no	0.230256	-0.421879	no	0.99718	-0.00631935	yes	0	1.42762	yes	5.48934e-05	-0.654467	5
GRMZM2G158575			✓			hypothetical protein LOC100383212 (LOC100383212), mRNA	hypothetical protein LOC100383212	NA	TPR_repeat	no	0.859317	0.0851385	no	0.109054	1.1563	no	0.769022	0.0438281	no	1.01335	-0.00334867	2
GRMZM2G077845			✓			LOC100284162 (pco077792), mRNA	LOC100284162	NA	GASA	no	1	0	no	1	0	no	0.516155	0.0837171	no	1.10843	0.0854949	NA
GRMZM2G137551			✓			NA	NA	NA	NA	no	1	1.79769e+308	no	1	1.79769e+308	no	1	-1.79769e+308	no	1	-1.79769e+308	NA
GRMZM2G144707			✓			hypothetical protein LOC100275349 (LOC100275349), mRNA	hypothetical protein LOC100275349	NA	TB2_DP1_HVA22	no	1	0.0173947	no	0.786152	-0.240804	no	1	-0.219179	no	0.684552	-0.636027	6
AC210013.4_FG003			✓			cycloartenol-C-24-methyltransferase 1 (LOC100286381), mRNA	cycloartenol-C-24-methyltransferase 1	steroid biosynthetic process;metabolic process;methyltransferase activity;lipid biosynthetic process	CFA/mycolic_acid_synthase; Methyltransf_11; Methyltransf_12; Sterol_MeTrfase_C	no	0.734299	0.361657	no	0.138462	1.26315	no	0.865612	0.0944928	no	1.11468	-0.161974	13
GRMZM5G846152			✓			NA	NA	homoiothermy;ice binding;response to freezing	DUF538; Antifreeze_1	yes	0.000711998	-0.944931	yes	0.000142511	-1.76226	yes	0.000402552	-0.374758	no	0.535775	-0.280222	19
GRMZM2G358931			✓			hypothetical protein LOC100193847 (LOC100193847), mRNA	hypothetical protein LOC100193847	histamine receptor activity;G-protein coupled receptor protein signaling pathway;integral to membrane;structural constituent of ribosome;cyclin-dependent protein kinase inhibitor activity;histamine receptor activity;intracellular;nucleus;ribosome;translation;cell cycle arrest;G-protein coupled receptor protein signaling pathway;integral to membrane	CDI; CDK_inhib_pln; Histamine_H3_recept; Ribosomal_P2	no	0.18958	-0.497229	no	0.168527	-0.882293	no	0.463819	0.079127	no	0.580667	0.11783	4
GRMZM2G381386			✓			NA	NA	nucleic acid binding;helicase activity;protein binding;ATP binding;zinc ion binding;nucleic acid binding;helicase activity;protein binding;ATP binding;zinc ion binding	DNA/RNA_helicase_C; Znf_RING	no	0.390552	0.377121	yes	0.0325279	1.14182	no	0.642242	0.0586633	no	1.12374	-0.0612434	18
GRMZM2G030523			✓	pcna1	proliferating cell nuclear antigen1	proliferating cell nuclear antigen1 (pcna1), mRNA	proliferating cell nuclear antigen1	DNA binding;regulation of DNA replication;DNA polymerase processivity factor activity;PCNA complex;DNA binding;regulation of DNA replication;DNA polymerase processivity factor activity;PCNA complex	Pr_cel_nuc_antig_C; Pr_cel_nuc_antig	no	0.344533	0.353008	no	0.396712	0.75923	yes	8.43221e-06	-0.263095	no	1.00792	-0.00116639	NA
GRMZM2G163407			✓			hypothetical protein LOC100276610 (LOC100276610), mRNA	hypothetical protein LOC100276610	NA	NA	no	1	-0.501045	no	0.673751	-0.328519	no	1	-0.0228488	no	1	0.320279	16
GRMZM2G531230			✓			NA	NA	hydrolase activity	Peptidase_T2	no	0.241254	-0.496305	yes	3.62574e-14	-3.41214	yes	0.012429	-0.497989	no	1.11795	0.20163	19
GRMZM2G703846			✓			NA	NA	NA	NA	no	1	0	no	1	0	no	1	0	no	1	0	NA
GRMZM2G136910			✓			abscisic stress protein homolog (aba1), mRNA	NA	response to stress	ABA_WDS	no	0.176241	-0.643013	no	0.69024	-0.2825	yes	0.000153575	0.624757	no	1.11375	0.103638	11
GRMZM2G316534			✓			sialyltransferase-like protein (LOC100285513), mRNA	sialyltransferase-like protein	protein amino acid glycosylation;sialyltransferase activity;integral to Golgi membrane	Glyco_trans_29; Ig/MHC_CS	no	0.0630127	-0.577818	yes	0.000142882	-1.81402	no	0.729234	0.0898473	no	0.896057	-0.20183	9
GRMZM2G461948			✓			NA	NA	intracellular;protein modification process;acid-amino acid ligase activity	HECT	no	0.511923	0.352019	yes	0.0184893	1.67761	no	0.956127	0.0115184	no	1.10088	-0.0405163	18
GRMZM2G074103			✓			LOC100279858 (IDP88), mRNA	LOC100279858;LOC100279858;LOC100279858;LOC100279858	nucleotide binding;transporter activity;ATP binding;transport;Gram-negative-bacterium-type cell wall;membrane;integral to membrane;ATPase activity;nucleoside-triphosphatase activity;ATPase activity, coupled to transmembrane movement of substances;transmembrane transport;nucleotide binding;ATP binding;transport;membrane;integral to membrane;ATPase activity;nucleoside-triphosphatase activity;ATPase…	ABC_Ald_N; ABC_transporter-like; ABC_transptrTM_dom_typ1; ATPase_AAA+_core; ABC_transporter_CS	no	0.236532	-0.442365	no	0.338364	0.609393	no	0.815291	0.101191	no	1.12342	-0.0893219	18
GRMZM2G312419			✓			NA	NA	DNA binding	Myb_DNA-bd; Homeodomain-like; SANT_DNA-bd	yes	0.000383556	-0.963841	yes	0.00924703	-1.47032	no	0.440738	0.158607	no	0.524422	0.243191	16
GRMZM2G050882			✓			NA	NA	nucleic acid binding;DNA binding;ATP binding;ATP-dependent helicase activity;hydrolase activity	Restrct_endonuc_I_R/III_Res; DNA/RNA_helicase_DEAD/DEAH_N; DEAD-like_N	no	0.535972	0.416434	yes	0.0187703	1.82349	yes	0.0338973	0.264074	no	1.06272	-0.0361143	17
GRMZM2G115255			✓			NA	NA	NA	NA	no	1	0.208392	no	0.0848918	1.36757	no	0.931163	-0.0239407	no	1.10871	-0.0663122	18
GRMZM2G094589			✓			NA	NA	response to desiccation	WHy-dom	yes	1.61082e-06	-1.32971	yes	0.00209243	-1.56021	no	0.665976	0.183357	no	1.04609	-0.0474646	11
GRMZM2G474777			✓			NA	NA	protein kinase activity;protein serine/threonine kinase activity;protein binding;ATP binding;protein amino acid phosphorylation;defense response	LRR-contain_N2; Leu-rich_rpt; Se/Thr_prot_kinase-like_dom; Ser-Thr/Tyr-Pkinase; Kinase-like_dom; Leu-rich_rpt_typical-subtyp; Tyr_Pkinase_cat_dom; Ser/Thr_prot_kinase_dom; Disease_R; Protein_kinase_ATP_BS; Ser/Thr_prot_kinase_AS	no	0.914561	-0.100677	no	0.0613631	1.37316	no	0.525341	0.159988	no	0.831951	0.245502	2
GRMZM2G172917			✓			NA	NA	NA	GRIP	no	0.794367	0.230374	yes	0.0428305	1.46622	no	0.475302	0.1388	no	1.02811	0.0166366	NA
GRMZM2G052476			✓			ternary complex factor MIP1 (LOC100286076), mRNA	ternary complex factor MIP1	NA	DUF547	no	0.815612	0.10189	no	0.513513	0.250844	no	0.578285	-0.20912	no	1.05415	-0.187183	19
GRMZM2G701861			✓			NA	NA	NA	NA	no	1	0	no	1	1.79769e+308	no	1	0.809379	no	1	0.475593	NA
GRMZM2G402797			✓			NA	NA	NA	NA	no	1	-1.14074	no	1	-1.03287	no	1	1.79769e+308	no	1	0.0164985	NA
GRMZM2G068714			✓			hypothetical protein LOC100383574 (LOC100383574), mRNA	hypothetical protein LOC100383574;hypothetical protein LOC100383574	pilus;pathogenesis;pilus;pathogenesis;pilus;pathogenesis	DUF250; P_pili_tip_PapF_prot	no	0.607321	-0.391224	no	0.326523	-0.629265	no	0.796396	0.216643	no	0.507493	-0.396685	12
GRMZM2G058595			✓			NA	NA	signal transducer activity;protein binding;response to light stimulus	NPH3; BTB/POZ_fold	no	0.131071	-0.74512	yes	1.68079e-11	-3.27601	no	1	-0.237151	no	1	0.234114	12
GRMZM2G447569			✓			NA	NA	NA	NA	no	1	1.79769e+308	no	1	-1.82779	no	1	-1.79769e+308	no	1	1.79769e+308	NA
GRMZM2G087675			✓			NA	NA	NA	NA	no	0.772766	0.210388	no	0.617695	0.362073	no	0.421496	-0.186617	no	1.0178	0.0105663	6
GRMZM2G463157			✓			NA	NA	NA	NA	no	1	0	no	1	0	no	1	0	no	1	0	NA
GRMZM2G137541			✓			DNA binding protein (LOC100286191), mRNA;hypothetical protein LOC100383015 (LOC100383015), mRNA	DNA binding protein;hypothetical protein LOC100383015	nucleus;transcription regulator activity;regulation of transcription	HLH_DNA-bd_dom; HLH_DNA-bd	no	0.336677	-0.5276	no	0.627183	-0.340426	yes	2.32308e-11	-0.925652	no	0.748558	-0.406808	5
GRMZM2G127035			✓			hypothetical protein LOC100275771 (LOC100275771), mRNA	hypothetical protein LOC100275771	NA	NA	no	0.817148	-0.15671	yes	0.0241956	-1.36989	no	1	0.559569	no	1	-0.690575	7
GRMZM2G181607			✓			LOC100272269 (pco089198), mRNA	NA	cell redox homeostasis;cell redox homeostasis	NA	yes	0.015402	-0.697475	no	0.802117	-0.151495	yes	0.000399984	0.370456	yes	0	-0.516507	8
GRMZM2G151397			✓			NA	NA	NA	NA	no	1	-1.41936	no	1	1.79769e+308	no	1	0.377609	no	1	-0.238664	NA
GRMZM2G128986			✓			NA	NA	NA	NA	yes	0.00396852	-1.42728	no	0.0592307	-1.28296	no	1	-0.20566	no	1	0.0799681	10
GRMZM2G094716			✓			NA	NA	proteolysis;serine-type peptidase activity	Peptidase_S28	no	1	0	no	1	0	no	1	0	no	1	0	NA
GRMZM2G053126			✓			NA	NA	NA	NA	no	1	0	no	1	0	no	1	0	no	1	0	NA
GRMZM2G444817			✓			NA	NA	homoiothermy;ice binding;response to freezing	Antifreeze_1	no	1	0	no	1	0	no	1	0	no	1	-1.79769e+308	NA
GRMZM2G073504			✓			LOC100274090 (cl21530_1), mRNA;YY1 protein (LOC100381326), mRNA	LOC100274090	NA	UBA-like; Ubiquitin-int_motif	no	0.922341	-0.057515	no	0.155025	0.908481	no	0.476423	-0.0971922	no	1.0858	-0.034648	NA
GRMZM2G046729			✓			atypical receptor-like kinase MARK (LOC100285980), mRNA	atypical receptor-like kinase MARK	protein kinase activity;protein serine/threonine kinase activity;protein binding;ATP binding;protein amino acid phosphorylation;protein kinase activity;protein serine/threonine kinase activity;ATP binding;protein amino acid phosphorylation	Ser-Thr/Tyr-Pkinase; Kinase-like_dom; Ser/Thr_prot_kinase_dom; Tyr_Pkinase_cat_dom	yes	0.0047309	-0.749076	yes	0.016713	-1.18935	no	0.550655	-0.103557	yes	0.00338645	-0.327481	12
GRMZM2G057753			✓			NA	NA	NA	DUF623	yes	4.35142e-05	-1.15119	yes	0.0041613	-1.49543	no	0.839989	-0.0774849	no	0.742111	0.289625	NA
GRMZM2G036092			✓			DNA binding protein (LOC100286150), mRNA	DNA binding protein	nucleus;transcription regulator activity;regulation of transcription	NA	yes	0.00107003	-0.876757	yes	0.00537241	-1.23691	no	0.168741	-0.237987	no	0.271147	-0.244494	NA
GRMZM2G062527			✓			GAST1 protein (LOC100281779), mRNA;LOC100284210 (gpm109a), mRNA	GAST1 protein;LOC100284210	NA	GASA	no	0.263559	-0.32169	yes	2.25727e-08	-1.51283	yes	0.0123129	0.277486	no	1.00949	-0.0024797	16
GRMZM2G590803			✓			NA	NA	NA	NA	no	1	0	no	1	0	no	1	0	no	1	0	NA
GRMZM2G133483			✓			NA	NA	NA	NA	yes	0.00769196	-1.13177	yes	0.0108723	-2.30155	yes	1.59907e-09	-1.84848	no	0.0647771	0.532805	16
GRMZM2G104542			✓			hypothetical protein LOC100191680 (LOC100191680), mRNA	hypothetical protein LOC100191680	transporter activity;ATP binding;cytoplasm;protein folding;oligopeptide transport;membrane;transporter activity;ATP binding;cytoplasm;protein folding;oligopeptide transport;membrane	Oligopeptide_transporter; MFS_general_subst_transpt; Chaperonin_Cpn60_CS	no	1	-0.621561	no	0.573649	-0.443652	yes	0.0205642	-1.0977	no	1.12835	0.283637	12
GRMZM2G022642			✓			LOC100193963 (si486073c04), mRNA	LOC100193963	photosynthetic electron transport in photosystem II;photosynthesis, light reaction;plasma membrane light-harvesting complex;electron transporter, transferring electrons within the cyclic electron transport pathway of photosynthesis activity;receptor activity;ion channel activity;extracellular-glutamate-gated ion channel activity;transport;ion transport;amino acid transport;photosynthetic electron…	AA-permease_dom; Photo_RC_L/M; AA/rel_permease1; AA_permease	yes	0.00386576	-0.423518	yes	0.000475195	-0.942872	no	0.150907	-0.196996	no	1.12691	-0.0893185	11
GRMZM2G430685			✓			hypothetical protein LOC100276759 (LOC100276759), mRNA	hypothetical protein LOC100276759	NA	UPF0310	no	0.22046	-0.384078	no	0.744624	0.159466	no	0.129238	-0.204669	no	0.539603	0.191601	NA
GRMZM5G822842			✓			NA	NA	NA	NA	no	0.438485	0.679631	yes	0.0189694	1.90675	no	0.379841	0.191708	no	1.04964	-0.0383805	NA
GRMZM2G417455			✓			hypothetical protein LOC100382452 (LOC100382452), mRNA	hypothetical protein LOC100382452	hydrolase activity, hydrolyzing O-glycosyl compounds;sugar binding;carbohydrate metabolic process;oxidoreductase activity, acting on single donors with incorporation of molecular oxygen, incorporation of two atoms of oxygen;metal ion binding;oxidation reduction;hydrolase activity, hydrolyzing O-glycosyl compounds;sugar binding;carbohydrate metabolic process;oxidoreductase activity, acting on sing…	Glycoside_Hdrlase_35; Lectin_gal-bd; Glyco_hydro_catalytic_core; Galactose-bd-like; LipOase_Fe_BS; Glyco_hydro_35_CS	no	0.999849	0.0048269	no	0.658995	0.724381	no	0.988976	0.0058065	no	1.08173	-0.033884	NA
GRMZM2G050262			✓			hypothetical protein LOC100276647 (LOC100276647), mRNA	NA	NA	NA	no	1	0	no	1	1.79769e+308	no	1	0	no	1	1.79769e+308	NA
GRMZM2G124560			✓			NA	NA	NA	WD40_repeat_sg; WD40_repeat-like_dom; WD40_repeat; WD40_repeat_CS; G-protein_beta_WD-40_rep_reg	no	1	0	no	1	1.79769e+308	no	1	0	no	1	0	NA
GRMZM2G030744			✓			hypothetical protein LOC100216625 (LOC100216625), mRNA	hypothetical protein LOC100216625	nucleus;transcription regulator activity;regulation of transcription;nucleus;transcription regulator activity;regulation of transcription;nucleus;transcription regulator activity;regulation of transcription	HLH_DNA-bd_dom; HLH_DNA-bd	no	0.0973971	-0.348219	no	0.567688	0.250215	yes	0.0346506	-0.203609	no	1.00947	0.00206126	NA
AC198923.4_FG002			✓			NA	hypothetical protein LOC100275390	NA	Tau_protein	no	1	-2.4106	yes	8.2325e-10	-4.68169	no	1	-0.116334	no	1	0.0270553	5
GRMZM2G095469			✓			NA	NA	NA	NA	no	1	0	no	1	0	no	1	0	no	1	0	NA
GRMZM2G158304			✓			NA	NA	NA	NA	no	0.806402	-0.130763	no	0.20201	0.826148	yes	0.0247798	-0.18399	no	1.00585	-0.000427603	10
GRMZM2G106204			✓			LOC100283014 (pco137297), mRNA	LOC100283014;LOC100283014	NA	NA	no	1	1.79769e+308	no	1	1.79769e+308	no	0.356594	-0.394098	no	1.10489	-0.275617	5
GRMZM2G427618			✓			gibberellin 2-beta-dioxygenase (LOC100281876), mRNA	gibberellin 2-beta-dioxygenase	iron ion binding;oxidoreductase activity;oxidation reduction	Oxoglutarate/Fe-dep_oxygenase; Isopenicillin-N_synthase	yes	0.000977223	-1.24417	yes	4.82667e-06	-2.54616	no	1	0.418984	no	1	0.400468	8
GRMZM5G821139			✓			hypothetical protein LOC100273970 (LOC100273970), mRNA;hypothetical protein LOC100276693 (LOC100276693), mRNA	hypothetical protein LOC100273970;hypothetical protein LOC100276693	NA	NA	yes	0.00191088	-0.619224	yes	0.00359367	-0.986618	no	0.458102	-0.129207	no	1.12322	-0.0659414	NA
GRMZM5G812270			✓			LOC100280319 (TIDP3422), mRNA	LOC100280319;LOC100280319;LOC100280319;LOC100280319	NA	Thioredoxin-like_fold	no	0.703118	-0.149425	no	0.301375	0.509706	no	0.860464	-0.0366583	no	1.03683	-0.0148879	20
GRMZM2G070167			✓			light-induced protein 1-like (LOC100281148), mRNA;light-induced protein 1-like (LOC100381327), mRNA	light-induced protein 1-like;light-induced protein 1-like	NA	Lir1	yes	0.0132467	-0.790543	yes	0.0168776	-1.23192	no	0.732772	0.103876	no	1.05358	0.0460003	NA
GRMZM2G181605			✓			NAC domain-containing protein 21/22 (LOC100285483), mRNA	NAC domain-containing protein 21/22	DNA binding;regulation of transcription	NAM	no	1	-1.0844	no	1	-1.23585	no	0.552649	-0.344564	yes	0.00345025	-1.40695	12
GRMZM2G448258			✓			cell division cycle 2-related protein kinase 7 (LOC100283405), mRNA	cell division cycle 2-related protein kinase 7	protein kinase activity;protein serine/threonine kinase activity;ATP binding;protein amino acid phosphorylation;protein kinase activity;protein serine/threonine kinase activity;MAP kinase activity;ATP binding;protein amino acid phosphorylation	Se/Thr_prot_kinase-like_dom; Ser-Thr/Tyr-Pkinase; Kinase-like_dom; Tyr_Pkinase_cat_dom; Ser/Thr_prot_kinase_dom; Protein_kinase_ATP_BS; Ser/Thr_prot_kinase_AS; Erk_3_4_MAPK	no	1.00128	0.00353645	no	0.501211	0.391228	no	0.996592	0.00404339	no	1.0318	0.017299	20
GRMZM2G169951			✓			NA	NA	integral to membrane;transmembrane transport	C4dc/mal_transpt	no	1	1.79769e+308	no	1	-3.04753	no	1	1.79769e+308	no	1	-0.186777	NA
GRMZM2G438176			✓			NA	NA	NA	NA	no	0.876388	0.0891756	no	0.285154	0.737688	no	0.714018	0.0573989	no	1.08119	-0.0371084	NA
GRMZM2G101062			✓			hypothetical protein LOC100217240 (LOC100217240), mRNA	hypothetical protein LOC100217240;hypothetical protein LOC100217240;hypothetical protein LOC100217240;hypothetical protein LOC100217240	NA	NA	no	0.960233	0.0180281	no	0.117107	0.438404	no	0.696237	-0.0599962	no	1.10711	0.0304676	18
GRMZM2G143627			✓			LOC100281977 (IDP217), mRNA	LOC100281977;LOC100281977	microtubule;tubulin complex assembly;unfolded protein binding;microtubule;tubulin complex assembly;unfolded protein binding	CofA_tubulin-bd	no	0.478202	-0.275391	no	0.444945	0.454419	yes	0.010376	-0.210909	no	1.07469	0.0298817	6
GRMZM2G107931			✓			NA	NA	NA	NA	no	1	0	no	1	0	no	1	0	no	1	1.79769e+308	NA
GRMZM2G353779			✓			NA	NA	NA	Bromodomain; Bromodomain_CS	no	0.556829	-0.255012	no	0.483234	0.377822	no	0.796143	-0.0659101	no	1.02253	0.0100084	NA
GRMZM2G347808			✓			hypothetical protein LOC100277845 (LOC100277845), mRNA	hypothetical protein LOC100277845	RNA methylation;protein binding;methyltransferase activity;RNA capping;protein binding	WW_Rsp5_WWP	no	0.483946	0.327951	yes	0.00794619	1.35308	no	0.824568	0.0513356	no	1.06102	-0.0218163	NA
GRMZM2G175232			✓			hypothetical protein LOC100382234 (LOC100382234), mRNA	hypothetical protein LOC100382234	DNA binding	Myb_DNA-bd; Homeodomain-like; SANT_DNA-bd	no	1	-1.06844	no	1	-1.206	no	1	-0.822258	no	1	-0.402607	NA
GRMZM2G148333			✓			ethylene response factor (LOC100283060), mRNA	ethylene response factor	DNA binding;transcription factor activity;regulation of transcription, DNA-dependent;DNA binding;transcription factor activity;regulation of transcription, DNA-dependent;homoiothermy;ice binding;response to freezing	TF_ERF_DNA-bd; DNA-bd_integrase-typ; Antifreeze_1	no	0.542125	-0.234008	no	0.854579	-0.130558	yes	0.00929295	-0.19228	yes	1.02609e-12	-0.535742	12
GRMZM2G487376			✓			NA	NA	NA	NA	no	1	0	no	1	0	no	1	1.79769e+308	no	1	-1.79769e+308	NA
GRMZM2G467756			✓			NA	protein binding protein	protein binding;zinc ion binding	Znf_C3HC4_RING-type; Znf_RING-CH; Znf_RING	yes	1.01307e-07	-1.72081	yes	2.07049e-06	-2.15373	no	1	0.626597	no	1	-0.628429	8
GRMZM2G105425			✓			LOC100191195 (pco102743), mRNA	LOC100191195;LOC100191195;LOC100191195	RNA binding;protein secretion;RNA binding;protein secretion;RNA binding;protein secretion	S4_RNA-bd; T3SS_OMP_SpaO; PSII_S4	no	0.551331	0.293162	no	0.0811837	0.769501	no	0.685616	-0.0980485	no	1.10898	0.102721	NA
GRMZM2G083538			✓			LOC100281771 (cl18044_1), mRNA	LOC100281771	metabolic process;amino acid binding	ACT-bd	yes	8.99443e-06	-1.20749	no	0.178626	-0.742936	no	1	0.0100575	no	0.686891	0.241969	16
GRMZM2G005459			✓			LOC100286166 (pco079656), mRNA	NA	nucleic acid binding;RNA binding	RRM_RNP1; Hud_Sxl_RNA	no	0.84217	0.0988926	no	0.264941	0.793536	yes	0.00154748	-0.227776	no	0.866473	-0.107621	NA
GRMZM2G355062			✓			NA	NA	NA	NA	no	1	-0.282392	no	0.818169	0.188071	no	0.662572	-0.173236	no	1.1217	-0.136043	12
GRMZM2G122937			✓			remorin (LOC100304007), mRNA	remorin;remorin	NA	NA	no	0.244416	-0.501468	no	0.194963	-0.572261	no	0.128534	0.245522	no	0.619624	0.182042	15
GRMZM2G454511			✓			NA	NA	protein kinase activity;protein serine/threonine kinase activity;ATP binding;sugar binding;protein amino acid phosphorylation;recognition of pollen	B_lectin_man-bd; S_locus_glycoprot; PAN-2_domain; Se/Thr_prot_kinase-like_dom; Ser-Thr/Tyr-Pkinase; Kinase-like_dom; Pan_app; Tyr_Pkinase_cat_dom; Ser/Thr_prot_kinase_dom; Protein_kinase_ATP_BS; Ser/Thr_prot_kinase_AS	no	1	0.165615	no	1	1.14288	no	1	-0.0780334	no	1	0.175378	12
GRMZM2G057475			✓			hypothetical protein LOC100383275 (LOC100383275), mRNA	hypothetical protein LOC100383275	diacylglycerol kinase activity;activation of protein kinase C activity by G-protein coupled receptor protein signaling pathway;diacylglycerol kinase activity;activation of protein kinase C activity by G-protein coupled receptor protein signaling pathway	Diacylglycerol_kinase_cat_dom	no	0.793345	-0.0966869	no	0.66	0.233846	no	0.936266	-0.0278553	no	1.12285	-0.0822168	13
GRMZM2G103247			✓			NA	NA	catalytic activity	PP2C_N; PP2C-related	no	1	-1.4394	no	1	-0.0207264	no	1	0	no	1	0	NA
GRMZM2G052890			✓	zag1	Zea AGAMOUS homolog1	homologue of Arabidopsis gene AGAMOUS (ZAG1), mRNA	homologue of Arabidopsis gene AGAMOUS	transcription factor activity;nucleus;regulation of transcription, DNA-dependent;sequence-specific DNA binding	TF_MADSbox; TF_Kbox	no	1	-1.16108	no	1	-1.75143	yes	0	-1.4757	no	1	0.736634	5
GRMZM2G339452			✓			NA	NA	NA	NA	no	1	0	no	1	1.79769e+308	no	1	0	no	1	0	NA
GRMZM2G033694			✓			histone-lysine N-methyltransferase, H3 lysine-36 and H4 lysine-20specific (LOC100282875), mRNA	histone-lysine N-methyltransferase, H3 lysine-36 and H4 lysine-20specific;histone-lysine N-methyltransferase, H3 lysine-36 and H4 lysine-20specific	nucleus;histone-lysine N-methyltransferase activity;nucleus;histone-lysine N-methyltransferase activity;nucleus;histone-lysine N-methyltransferase activity	NA	no	0.850123	0.0911055	no	0.067253	0.797806	no	0.962642	-0.0178957	no	1.08548	0.0974597	NA
GRMZM2G115456			✓			hypothetical protein LOC100273077 (LOC100273077), mRNA	hypothetical protein LOC100273077	transcription factor activity;nucleus;regulation of transcription, DNA-dependent;homoiothermy;sequence-specific DNA binding;ice binding;response to freezing	HSF_DNA-bd; Antifreeze_1	no	0.406032	-0.299308	no	0.351676	0.791767	no	0.980024	0.00518823	no	1.03669	-0.0117061	18
GRMZM2G079353			✓			LOC100273638 (pco123260), mRNA	LOC100273638	NA	NA	no	0.246049	-0.57707	no	0.0520523	-1.15126	no	0.964127	0.0339173	no	1.11844	-0.21097	NA
AC210013.4_FG002			✓			NA	NA	copper ion binding;electron carrier activity	Plcyanin-like; Cupredoxin	no	1	1.79769e+308	no	0.0738543	-1.40153	no	1	-0.495724	no	1.06977	-0.132618	6
GRMZM2G052467			✓			hypothetical protein LOC100275173 (LOC100275173), mRNA	hypothetical protein LOC100275173	homoiothermy;ice binding;response to freezing	Antifreeze_1	no	0.823843	-0.160888	yes	4.83241e-12	-3.21043	no	0.387429	0.376209	no	1.08547	-0.136541	19
GRMZM2G303587			✓			NA	NA	NA	Pentatricopeptide_repeat; WD40_repeat_CS	no	0.794067	-0.165344	no	0.580831	0.368651	no	0.337281	0.115272	no	1.01692	0.00639796	18
GRMZM2G119300			✓			NA	NA	biosynthetic process;transferase activity;nucleotidyltransferase activity;biosynthetic process;transferase activity;nucleotidyltransferase activity;biosynthetic process;transferase activity;nucleotidyltransferase activity	NTP_transferase; Hexapep_transf; Hexapep_transf_CS	no	0.0798604	0.522736	yes	0.00279934	1.2917	yes	0.0114803	-0.21862	no	1.10837	-0.072719	13
GRMZM2G097768			✓	stp1	sugar transport1	hypothetical protein LOC100193700 (LOC100193700), mRNA	hypothetical protein LOC100193700;hypothetical protein LOC100193700	transporter activity;transport;dicarboxylic acid transport;protein transport;P-P-bond-hydrolysis-driven protein transmembrane transporter activity;membrane;integral to membrane;sodium:dicarboxylate symporter activity;substrate-specific transmembrane transporter activity;transmembrane transport;transporter activity;transport;dicarboxylic acid transport;protein transport;P-P-bond-hydrolysis-driven …	Sub_transporter; MFS_1; MFS_general_subst_transpt; Sugar/inositol_transpt; Na-dicarboxylate_symporter; SecY; Sugar_transporter_CS	no	0.310783	0.327373	no	0.135158	0.823434	no	0.537101	-0.0802416	no	1.0485	-0.018592	NA
AC203535.4_FG002			✓			NAC domain-containing protein 68 (LOC100284870), mRNA	NAC domain-containing protein 68	DNA binding;regulation of transcription	NAM	yes	6.05372e-05	-1.27241	yes	0.00161284	-2.08221	no	0.175255	-0.141162	yes	0.0184161	0.259088	NA
GRMZM2G427529			✓			LOC100279510 (cl20482_1), mRNA	LOC100279510	NA	Leu-rich_rpt_Cys-con_subtyp	no	0.900638	-0.0489178	no	0.433499	0.452035	no	0.755363	-0.0401806	no	1.10146	0.0327916	17
GRMZM5G870176			✓			hypothetical protein LOC100383550 (LOC100383550), mRNA	hypothetical protein LOC100383550	membrane;cellulose synthase (UDP-forming) activity;cellulose biosynthetic process	Cellulose_synth	no	0.724667	0.176629	no	0.611764	-0.203146	no	0.109785	0.123195	no	0.328474	0.133367	NA
GRMZM5G805685			✓			hypothetical protein LOC100193946 (LOC100193946), mRNA	NA	DNA binding;regulation of transcription, DNA-dependent;DNA binding;regulation of transcription, DNA-dependent	TF_B3	yes	3.52481e-05	-1.01318	no	0.635808	-0.258026	no	0.272509	-0.441391	no	1.11893	0.131737	4
GRMZM2G010000			✓			hypothetical protein LOC100383361 (LOC100383361), mRNA	NA	heat shock protein binding;heat shock protein binding;heat shock protein binding	TPR-1; TPR_2; TPR_repeat	yes	0.00721919	-0.74651	yes	0.000228055	-1.73728	yes	0.0132951	-0.266703	no	1.04411	-0.017287	NA
GRMZM2G376432			✓			GIR1 (LOC100281029), mRNA	NA	NA	NA	no	1	0	no	1	0	yes	0.000184228	-0.206944	no	1.12621	0.0478063	17
GRMZM5G817759			✓			LOC100272453 (pco133450), mRNA	LOC100272453	nucleoside transmembrane transporter activity;transport;membrane;nucleoside transmembrane transporter activity;transport;membrane	DER/eqnu_transpt	no	0.118265	-0.475323	no	0.996143	0.00622528	no	0.677387	0.0833348	no	1.12624	0.0714552	NA
GRMZM2G157147			✓			hypothetical protein LOC100216938 (LOC100216938), mRNA	hypothetical protein LOC100216938	ATP binding;phosphatidylinositol phosphate kinase activity;1-phosphatidylinositol-4-phosphate 5-kinase activity;phosphatidylinositol metabolic process	MORN; PInositol-4-P-5-kinase_core; PInositol-4P-5-kinase_core_sub; PIno-4-P-5_kinase_pln	no	0.781889	-0.132063	no	0.901967	0.135389	no	0.609974	0.0534718	no	0.760599	0.0975508	NA
GRMZM2G082032			✓			NA	NA	hydrolase activity	Peptidase_T2	no	0.62499	-0.209454	yes	6.85752e-12	-3.10881	yes	4.58138e-09	-0.574783	no	0.375838	0.283505	19
GRMZM5G817934			✓			NA	NA	NA	SWIB_MDM2_domain; SWIB_domain	no	0.87414	0.16918	yes	0.0349035	1.59758	no	0.878011	0.0396976	no	1.12648	-0.0732641	10
GRMZM2G179777			✓			triacylglycerol lipase (LOC100282659), mRNA	triacylglycerol lipase	NA	NA	yes	0.00427447	-0.935887	yes	5.00209e-07	-2.28881	no	0.505337	-0.17991	no	1.11313	-0.156521	19
GRMZM2G414460			✓			NA	NA	NA	Beta-tubulin_BS	no	0.804585	0.0800786	no	1	0	no	0.379513	-0.147537	no	1.04399	0.0343591	NA
GRMZM5G865626			✓			NA	NA	transcription factor activity;nucleus;regulation of transcription, DNA-dependent	TF_CBFB	no	1	1.79769e+308	no	1	1.79769e+308	no	1	0	no	1	0	NA
GRMZM2G005290			✓			NA	NA	NA	Peptidase_aspartic	no	1	-0.355608	no	1	-3.83202	no	1	-0.826345	no	1	0.128492	12
GRMZM2G001934			✓			hypothetical protein LOC100192365 (LOC100192365), mRNA	hypothetical protein LOC100192365	protein kinase activity;protein serine/threonine kinase activity;protein binding;ATP binding;protein amino acid phosphorylation;protein kinase activity;protein serine/threonine kinase activity;ATP binding;protein amino acid phosphorylation	Ser-Thr/Tyr-Pkinase; Kinase-like_dom; Tyr_Pkinase_cat_dom; Ser/Thr_prot_kinase_dom; Ser/Thr_prot_kinase_AS	yes	0.0458319	-0.49318	no	0.0544004	-1.40719	no	0.523405	0.0640159	no	0.770587	0.0976708	NA
GRMZM2G027100			✓			NA	NA	NA	NA	no	1	0	no	1	0	no	1	0	no	1	0	NA
GRMZM2G074496			✓			NA	NA	ATP binding;apoptosis;defense response	NB-ARC; Disease_R	no	1	0.812848	no	0.257631	0.951815	no	0.311068	0.431511	no	1.01494	-0.296107	2
GRMZM2G050734			✓			LOC100281409 (si486095h11), mRNA	LOC100281409;LOC100281409	ubiquitin ligase complex;ubiquitin-protein ligase activity;binding;protein ubiquitination;ubiquitin ligase complex;ubiquitin-protein ligase activity;binding;protein ubiquitination;ubiquitin ligase complex;ubiquitin-protein ligase activity;protein ubiquitination	Ubox_domain	no	0.946867	0.0458494	yes	0.0204297	1.09816	no	0.972816	0.0173056	no	0.402086	-0.197478	5
GRMZM2G016480			✓			hypothetical protein LOC100382395 (LOC100382395), mRNA	hypothetical protein LOC100382395	protein kinase activity;protein serine/threonine kinase activity;protein binding;ATP binding;protein amino acid phosphorylation	LRR-contain_N2; Leu-rich_rpt; Ser-Thr/Tyr-Pkinase; Se/Thr_prot_kinase-like_dom; Kinase-like_dom; Leu-rich_rpt_typical-subtyp; Tyr_Pkinase_cat_dom; Ser/Thr_prot_kinase_dom; Protein_kinase_ATP_BS	no	0.92051	0.053435	no	0.482678	0.65238	no	0.82222	0.0285572	no	0.363795	-0.132205	NA
GRMZM2G143651			✓			LOC100282690 (si946088d04), mRNA	LOC100282690	catalytic activity;3-beta-hydroxy-delta5-steroid dehydrogenase activity;steroid biosynthetic process;dTDP-4-dehydrorhamnose reductase activity;cellular metabolic process;extracellular polysaccharide biosynthetic process;coenzyme binding	Epimerase_deHydtase; NmrA; dTDP_dehydrorham_reduct; 3Beta_OHSteriod_DH/Estase; Male_sterile_NAD-bd	no	0.41949	0.302079	yes	0.0045639	0.982799	yes	0.0280948	-0.151448	no	1.01725	0.00378859	NA
GRMZM2G005435			✓			hypothetical protein LOC100193170 (LOC100193170), mRNA;hypothetical protein LOC100272295 (LOC100272295), mRNA	hypothetical protein LOC100193170;hypothetical protein LOC100272295	NA	DUF862_euk	yes	0.046865	0.539537	yes	0.0157421	1.18636	no	0.132299	-0.120953	no	1.04299	0.0144533	14
GRMZM2G700339			✓			NA	NA	NA	NA	no	1	0	no	1	1.79769e+308	no	1	0	no	1	0	NA
GRMZM2G131699			✓			auxin-independent growth promoter (LOC100281703), mRNA	auxin-independent growth promoter	NA	NA	no	0.348251	-0.383735	no	0.412116	0.543856	no	0.977279	-0.00745795	no	1.11529	0.0507975	20
GRMZM2G125585			✓			NA	NA	NA	NA	no	0.29702	0.663031	no	0.0563793	1.32656	no	0.511443	0.132898	no	1.08496	-0.0407149	18
GRMZM2G068904			✓			NA	NA	thromboxane receptor activity;ion channel activity;voltage-gated potassium channel activity;ion transport;potassium ion transport;G-protein coupled receptor protein signaling pathway;membrane;integral to membrane;transmembrane transport	Ion_trans; cNMP-bd; cNMP-bd-like; K_chnl_volt-dep_EAG/ELK/ERG; Thbox_rcpt	no	1	0	no	1	0	no	1	0	no	1	0	NA
GRMZM2G162305			✓			hypothetical protein LOC100277704 (LOC100277704), mRNA	hypothetical protein LOC100277704	NA	NA	yes	0.00529959	-0.969305	yes	0.000286431	-1.91589	no	0.61084	-0.156802	no	0.311463	-0.420342	9
GRMZM2G470671			✓			p8MTCP1 (LOC100282895), mRNA	p8MTCP1;p8MTCP1;p8MTCP1;p8MTCP1	NA	CHCH; MTCP1	no	0.995877	-0.0070931	no	0.294097	0.580977	no	0.925231	0.0322732	no	1.05423	-0.0336155	NA
GRMZM2G099366			✓			NA	NA	NA	TPR-1; TPR_2; Ankyrin_rpt-contain_dom; TPR_repeat	no	1	0.517347	no	0.122792	1.49452	no	0.930801	0.0557879	no	1.09334	0.10538	NA
GRMZM2G107984			✓			NA	NA	nucleic acid binding;helicase activity;ATP binding;ATP-dependent helicase activity;homoiothermy;ice binding;response to freezing;nucleic acid binding;helicase activity;ATP binding;ATP-dependent helicase activity;homoiothermy;ice binding;response to freezing	DNA/RNA_helicase_DEAD/DEAH_N; DNA/RNA_helicase_C; DEAD-like_N; Antifreeze_1	no	0.715856	-0.16278	no	0.327297	0.359439	no	0.978415	0.00525616	no	1.06849	-0.0189362	14
AC189879.3_FG003			✓			hypothetical protein LOC100384364 (LOC100384364), mRNA	hypothetical protein LOC100384364	nucleic acid binding	DUF1785; PAZ; Piwi; PolynucTfrase_RNaseH_fold	no	0.843963	-0.0993162	no	1.00393	-0.00122252	no	0.302316	-0.0913328	no	0.186318	-0.144149	18
GRMZM2G112629			✓			hypothetical protein LOC100272488 (LOC100272488), mRNA	hypothetical protein LOC100272488	nucleus;transcription regulator activity;regulation of transcription	HLH_DNA-bd_dom; HLH_DNA-bd	no	0.120959	0.517346	yes	1.06363e-09	-2.62867	no	0.0678626	0.642877	no	0.0922218	-0.303044	19
GRMZM2G417843			✓			hypothetical protein LOC100191272 (LOC100191272), mRNA	hypothetical protein LOC100191272	catalytic activity;metabolic process;hydrolase activity;phosphatase activity	NA	no	0.851946	-0.0842236	no	0.9442	-0.0515991	no	0.393591	-0.132652	no	1.09904	0.105593	1
GRMZM2G099319			✓			hypothetical protein LOC100192481 (LOC100192481), mRNA	hypothetical protein LOC100192481	transcription factor activity;nucleus;regulation of transcription, DNA-dependent;transcription regulator activity;sequence-specific DNA binding	POX; Homeobox; Homeodomain-like; HTH_lambrepressr; Homeobox_CS	no	0.708904	-0.22767	no	0.275982	-0.687632	no	0.0608516	-0.54601	no	1.07402	-0.133376	10
GRMZM5G800112			✓			hypothetical protein LOC100193883 (LOC100193883), mRNA;endothelial differentiation-related factor 1 (LOC100281634), mRNA	hypothetical protein LOC100193883	DNA binding;sequence-specific DNA binding	MBF1_N; HTH_3; Lambda_DNA-bd	no	0.442847	-0.657904	no	0.848447	-0.108783	no	0.736665	-0.0395027	no	1.12595	0.0462909	NA
GRMZM2G110195			✓			hypothetical protein LOC100274520 (LOC100274520), mRNA	hypothetical protein LOC100274520	NA	AA_transpt_TM	no	0.442626	-0.45146	yes	0.00423752	-1.6493	no	0.120108	-0.506438	no	0.767511	-0.492589	9
GRMZM2G343157			✓			ZIM motif family protein (LOC100284778), mRNA	ZIM motif family protein	NA	Tify; CCT_dom-like	no	0.516333	-0.281615	yes	0.0152582	-1.27601	no	1	0.298948	no	1.07393	-0.238866	12
GRMZM5G836977			✓			NA	NA	lipid metabolic process;metabolic process	Patatin/PhospholipaseA2-rel; Acyl_Trfase/lysoPlipase; K_chnl_volt-dep_Kv1.4	no	0.220192	0.745578	yes	1.61772e-07	-3.56367	no	1	-0.759171	no	1	-0.81283	11
GRMZM2G418604			✓			LOC100194141 (si687055e04b), mRNA	LOC100194141;LOC100194141;LOC100194141	binding;binding;protein binding;RNA metabolic process;binding;protein binding;RNA metabolic process	MIF4G-like_typ-3; Up-fram_suppressor-2; ARM-type_fold	no	0.6204	-0.158961	no	0.130465	0.716176	no	0.219441	0.100914	no	1.12462	0.039471	20
GRMZM2G408768			✓			NA	NA	protein domain specific binding;protein domain specific binding;protein domain specific binding	14-3-3	no	0.11091	-0.390228	no	0.877602	-0.435476	no	0.891557	-0.0188595	no	1.09007	0.0264743	3
GRMZM2G112598			✓			NA	NA	DNA binding;site-specific DNA-methyltransferase (cytosine-N4-specific) activity;integral to membrane;DNA methylation on cytosine;transmembrane transport	Auxin_eff; MeTrfase_CN4_CS	no	0.528329	0.509082	yes	0.0438535	-1.58452	no	1	-0.0344017	no	1	0.673104	6
GRMZM2G444819			✓			hypothetical protein LOC100278748 (LOC100278748), mRNA	hypothetical protein LOC100278748	NA	NA	no	0.774766	-0.302299	yes	1.24037e-07	-3.51171	no	1	0.350638	no	1	-1.41588	11
GRMZM2G156905			✓			NA	NA	protein binding;protein kinase activity;protein serine/threonine kinase activity;protein binding;ATP binding;protein amino acid phosphorylation	LRR-contain_N2; Leu-rich_rpt; Ser-Thr/Tyr-Pkinase; Kinase-like_dom; Leu-rich_rpt_typical-subtyp; Tyr_Pkinase_cat_dom; Ser/Thr_prot_kinase_dom; Ser/Thr_prot_kinase_AS	no	1	0.167894	no	1	-2.90196	no	1	0.125757	no	1	-0.450401	19
GRMZM2G055334			✓			hypothetical protein LOC100276483 (LOC100276483), mRNA	hypothetical protein LOC100276483;hypothetical protein LOC100276483	protein kinase activity;protein serine/threonine kinase activity;ATP binding;protein amino acid phosphorylation;protein kinase activity;ATP binding;protein amino acid phosphorylation	Kinase-like_dom; Tyr_Pkinase_cat_dom; Ser-Thr/Tyr-Pkinase	no	0.736166	-0.130422	no	0.274443	0.826394	no	0.883021	0.02412	no	1.09617	-0.0360636	NA
AC187813.3_FG002			✓			NA	NA	NA	NA	no	1	0	no	1	0	no	1	0	no	1	0	NA
GRMZM5G816423			✓			hypothetical protein LOC100384567 (LOC100384567), mRNA	hypothetical protein LOC100384567	NA	NA	no	1	-0.0372427	no	1	0.807297	no	1	0.256533	no	1	-0.408829	NA
GRMZM2G055313			✓			xylosyltransferase oxt (LOC100281681), mRNA	xylosyltransferase oxt	acetylglucosaminyltransferase activity;membrane	Glyco_trans_14	no	0.102343	-0.653519	yes	0.0325415	-1.24024	no	1	1.79769e+308	no	1	0.0954524	15
GRMZM2G017299			✓			NA	NA	histidine biosynthetic process;catalytic activity;cytoplasm;glutamine metabolic process;biosynthetic process;cobalamin biosynthetic process;transferase activity, transferring pentosyl groups	GATase_class1_C; GATase_3; GATASE; Anth_synthII; Imidazole-glycPsynth_HisH	no	1	-0.257409	no	0.779145	0.25913	no	0.953704	0.0471706	no	1.0509	-0.0744349	17
GRMZM2G334567			✓			NA	NA	NA	NA	no	1	0	no	1	0	no	1	0	no	1	0	NA
GRMZM2G334084			✓			NA	NA	NA	NA	no	1	0	no	1	0	no	1	0	no	1	-1.79769e+308	NA
GRMZM2G061419			✓			hypothetical protein LOC100383406 (LOC100383406), mRNA	hypothetical protein LOC100383406	NA	NA	no	0.973622	0.0233306	no	0.114844	1.20936	no	0.976061	-0.00646978	no	0.894772	-0.10284	18
GRMZM5G841309			✓			NA	NA	NA	NA	no	1	-0.5547	no	1	2.59714	no	1	1.79769e+308	no	1	6.61185e-05	NA
GRMZM5G817559			✓			NA	NA	metabolic process;acyltransferase activity	Acyltransferase	no	1	-0.424994	no	0.817587	0.221898	no	0.92936	0.0644592	no	1.11632	-0.19433	12
GRMZM2G155217			✓			hypothetical protein LOC100383774 (LOC100383774), mRNA	hypothetical protein LOC100383774	nucleus;transcription regulator activity;regulation of transcription	HLH_DNA-bd; HLH_DNA-bd_dom	no	0.986109	0.0233429	no	0.779726	-0.196312	no	0.962881	0.0220081	no	1.11202	-0.159941	9
GRMZM2G059937			✓			outer mitochondrial membrane protein porin (LOC100282722), nuclear gene encoding mitochondrial protein, mRNA	outer mitochondrial membrane protein porin	mitochondrial outer membrane;anion transport;voltage-gated anion channel activity;transmembrane transport	Porin_Euk	yes	0.0165264	1.24091	yes	0.0449378	1.42778	no	0.638928	-0.0847309	no	1.05552	0.0291031	2
GRMZM2G364612			✓			NA	NA	protein binding;zinc ion binding	DUF1117; Znf_RING	no	0.320606	-0.349616	yes	4.3724e-05	-1.74068	no	0.699189	-0.127984	no	1.10306	0.0933364	11
GRMZM2G456570			✓			NA	NA	protein binding;ATP binding;chromosome;chromosome organization;protein binding;ATP binding;chromosome;chromosome organization	RecF/RecN/SMC_N; SMC_hinge	no	0.808492	0.114535	no	0.813878	0.8528	no	0.818933	0.0204685	yes	7.9831e-05	-0.19577	17
GRMZM2G117412			✓			hypothetical protein LOC100273427 (LOC100273427), mRNA	hypothetical protein LOC100273427;hypothetical protein LOC100273427	NA	NA	no	1	-1.79769e+308	no	1	-0.0848134	no	1	0.242888	no	1	-1.26144	NA
GRMZM2G035741			✓			hypothetical protein LOC100274856 (LOC100274856), mRNA	hypothetical protein LOC100274856	metabolic process;oxidoreductase activity;oxidation reduction;metabolic process;oxidoreductase activity;oxidation reduction;metabolic process;oxidoreductase activity;oxidation reduction;metabolic process;oxidoreductase activity;oxidation reduction;metabolic process;oxidoreductase activity;oxidation reduction	Ald_DH_CS	no	0.525841	-0.224687	no	0.0694417	0.602095	no	0.783204	0.0272599	no	1.11786	-0.043451	17
GRMZM2G107945			✓			hypothetical protein LOC100383277 (LOC100383277), mRNA	NA	protein binding;regulation of transcription, DNA-dependent;signal transduction	F-box_dom_cyclin-like; Kelch_1; Kelch_2; Gal_Oxase/kelch_b-propeller; F-box_dom_Skp2-like; PAC	no	0.880386	0.0807434	no	0.842978	-0.176343	no	0.636704	-0.054959	no	0.0817425	-0.200928	6
GRMZM5G889225			✓			NA	NA	NA	NA	no	1	0	no	1	0	no	1	0	no	1	0	NA
GRMZM2G165461			✓			LOC100281623 (pco142893), mRNA	LOC100281623	NA	NA	yes	5.53342e-05	-1.20676	yes	0.00186706	-1.47032	no	0.925834	0.0523337	no	1.06199	-0.0702994	11
GRMZM2G463028			✓			NA	NA	RNA binding;rRNA processing;tRNA processing;methyltransferase activity	Fibrillarin	no	1	1.79769e+308	no	1	1.79769e+308	no	1	0.353706	no	1	0.211655	NA
GRMZM2G004511			✓			hypothetical protein LOC100273279 (LOC100273279), mRNA;remorin (LOC100286068), mRNA	hypothetical protein LOC100273279;remorin	NA	Remorin_C	no	0.772634	-0.139999	yes	7.32192e-07	-2.10859	no	0.149216	0.614575	no	0.186412	-0.69305	15
GRMZM2G081943			✓			hypothetical protein LOC100193385 (LOC100193385), mRNA	hypothetical protein LOC100193385	NA	DUF1639	no	0.919262	0.0470875	no	0.249951	0.362006	no	0.396003	-0.127795	no	0.4301	0.187203	NA
GRMZM2G001905			✓			NA	NA	hydrolase activity;hydrolase activity	NA	no	0.669911	0.214745	no	0.143096	0.855154	no	0.816426	-0.110926	no	1.11507	-0.115859	NA
GRMZM2G348512			✓			carbonic anhydrase (LOC100283752), mRNA;hypothetical protein LOC100274597 (LOC100274597), mRNA;carbonic anhydrase (LOC100285064), mRNA;carbonic anhydrase (LOC100285064), mRNA;carbonic anhydrase (LOC100285064), mRNA	hypothetical protein LOC100274597;carbonic anhydrase;hypothetical protein LOC100274597;carbonic anhydrase;carbonic anhydrase;carbonic anhydrase;carbonic anhydrase	carbonate dehydratase activity;zinc ion binding;carbon utilization;carbonate dehydratase activity;zinc ion binding;carbon utilization;carbonate dehydratase activity;zinc ion binding;carbon utilization;carbonate dehydratase activity;zinc ion binding;carbon utilization;carbonate dehydratase activity;zinc ion binding;carbon utilization;carbonate dehydratase activity;zinc ion binding;carbon utilizati…	Carbonic_anhydrase; Carbonic_anhydrase_CS	no	0.497753	0.615201	no	0.741791	-0.223541	no	0.404477	-0.664659	no	1	0.00492451	13
GRMZM2G131907			✓			LOC100282568 (pco061446a), mRNA	LOC100282568;LOC100285146	adenine phosphoribosyltransferase activity;cytoplasm;adenine salvage;nucleoside metabolic process;nucleoside metabolic process	PRibTrfase	no	0.823804	-0.107763	no	0.720338	0.295678	yes	0.00469964	-0.186186	no	1.12877	0.0436256	3
GRMZM2G027007			✓			hypothetical protein LOC100277819 (LOC100277819), mRNA	hypothetical protein LOC100277819	NA	NA	no	0.0750867	-0.588557	no	0.294096	-0.619324	no	0.571402	-0.0795801	no	0.977035	0.124727	NA
GRMZM2G002147			✓			hypothetical protein LOC100193332 (LOC100193332), mRNA	hypothetical protein LOC100193332	binding;homoiothermy;ice binding;response to freezing;binding;homoiothermy;ice binding;response to freezing	ARM-type_fold; WD40_repeat_CS; Antifreeze_1	yes	0.0361802	-0.714804	yes	0.00386578	-1.57699	no	0.344217	-0.0909888	no	1.03165	0.00899222	11
GRMZM2G073377			✓			anther-specific protein 3 (nthr3), mRNA;YY1 protein (LOC100282159), mRNA;YY1 protein (LOC100303950), mRNA;YY1 protein (LOC100381326), mRNA	YY1 protein;YY1 protein;anther-specific protein 3;YY1 protein;YY1 protein;anther-specific protein 3;YY1 protein	NA	LTP/seed_store/tryp_amyl_inhib; Bifunc_inhib/LTP/seed_store	no	1.00482	0	no	0.0795113	1.79769e+308	no	1.00528	0	no	0.770811	-1.79769e+308	11
GRMZM2G151319			✓			carboxyl-terminal proteinase (LOC100285192), mRNA	carboxyl-terminal proteinase;carboxyl-terminal proteinase	UDP-glucose metabolic process;membrane;UDP-glucose metabolic process;membrane	DUF239_pln	yes	0.00417819	-0.662398	yes	0.000319863	-1.14762	no	0.566176	-0.239782	no	1.06325	-0.0370811	19
GRMZM2G061016			✓			NA	NA	magnesium ion binding;lyase activity	Terpene_synthase_metal-bd; Terpenoid_synth	no	1	0	no	1	0	no	1	1.79769e+308	no	1	0	NA
GRMZM2G130375			✓			hypothetical protein LOC100272556 (LOC100272556), mRNA	hypothetical protein LOC100272556	hydrolase activity, hydrolyzing O-glycosyl compounds;carbohydrate metabolic process;hydrolase activity, hydrolyzing O-glycosyl compounds;carbohydrate metabolic process;hydrolase activity, hydrolyzing O-glycosyl compounds;sugar binding;carbohydrate metabolic process;sugar binding	Lectin_gal-bd; Galactose-bd-like; Prot_Inh_CR_TIL	no	0.606823	-0.147659	no	0.183583	0.819115	no	0.549784	0.0578865	no	0.640043	-0.0933282	18
GRMZM2G703322			✓			NA	NA	NA	NA	no	1	-1.79769e+308	no	1	0.220207	no	1	0.745979	no	1.01393	0.0324574	NA
GRMZM2G178990			✓			NA	NA	NA	NA	no	1	1.0362	no	1	0.00142922	no	1	0.520899	no	1	0.0143003	NA
GRMZM2G032896			✓			NA	NA	monooxygenase activity;transporter activity;iron ion binding;transport;electron carrier activity;membrane;heme binding;transmembrane transport;oxidation reduction	Cyt_P450; Cyt_P450_E_grp-I; Cyt_P450_CS; Sugar_transporter_CS	no	1	-0.374098	no	1	-0.0612021	no	1	1.40396	no	1	1.25166	16
GRMZM2G090010			✓			LOC100272473 (IDP454), mRNA	LOC100272473	cellular process;aminopeptidase activity;proteolysis;metalloexopeptidase activity;cellular process;cellular process;aminopeptidase activity;proteolysis;metalloexopeptidase activity;cellular process;aminopeptidase activity;proteolysis;metalloexopeptidase activity;cellular process;cellular process	Pept_M24_structural-domain	yes	4.20842e-08	-1.54423	yes	8.81472e-05	-1.37857	no	0.472135	0.370579	no	0.814219	-0.443847	11
GRMZM2G373928			✓	zcn14	phosphatidylethanolamine-binding protein14	ZCN14 protein (ZCN14), mRNA	ZCN14 protein;ZCN14 protein	NA	PtdEtn-bd_prot_PEBP; Phosphotidylethanolamine-bd_CS	yes	0.0493193	-0.810041	no	0.107224	-0.860438	no	0.0732636	-0.27197	no	0.223409	-0.265448	9
GRMZM2G049568			✓			hypothetical protein LOC100304268 (LOC100304268), mRNA	hypothetical protein LOC100304268	ubiquitin thiolesterase activity;ubiquitin-dependent protein catabolic process;ubiquitin thiolesterase activity;ubiquitin-dependent protein catabolic process	Peptidase_C19; Pept_C19ubi-hydrolase_C_CS	no	0.560486	0.278606	no	0.119377	0.977939	no	0.936996	0.0162887	no	1.0726	0.0307388	NA
GRMZM2G162525			✓			12-oxo-phytodienoic acid reductase (OPR4), mRNA;hypothetical protein LOC100193970 (LOC100193970), mRNA	hypothetical protein LOC100193970	nucleic acid binding	Piwi; PolynucTfrase_RNaseH_fold	no	0.721549	-0.168531	no	0.370137	0.402318	no	1.00364	0.000517462	no	1.03664	-0.0106821	NA
GRMZM2G046601			✓	gln3	glutamine synthetase3	glutamine synthetase (LOC542215), mRNA	NA	glutamate-ammonia ligase activity;nitrogen compound metabolic process;glutamate-ammonia ligase activity;glutamine biosynthetic process;nitrogen compound metabolic process;glutamate-ammonia ligase activity;glutamine biosynthetic process;nitrogen compound metabolic process;glutamate-ammonia ligase activity;nitrogen compound metabolic process	Gln_synth_cat_dom	no	1	-0.243013	no	0.668714	-0.339599	no	1	0.448559	no	1	-0.0427957	NA
GRMZM2G017223			✓			hypothetical protein LOC100382516 (LOC100382516), mRNA	NA	acid phosphatase activity	Acid_phosphat_B	no	1	0.409817	no	1	-3.38355	no	1	0.55667	no	1	0.438695	9
GRMZM2G002135			✓			acyltransferase (LOC100284451), mRNA	acyltransferase	metabolic process;acyltransferase activity	Tafazzin	no	0.797497	0.132531	no	0.273933	0.690344	no	0.357172	0.157744	no	1.11875	0.0598042	NA
GRMZM2G020929			✓			NA	NA	NA	NA	no	0.801783	0.134727	no	0.255455	0.751591	no	0.791307	-0.0535162	no	1.02706	0.125942	6
GRMZM2G053083			✓			hypothetical protein LOC100276891 (LOC100276891), mRNA	hypothetical protein LOC100276891	NA	NA	no	0.91816	0.0725738	no	0.208203	0.810968	no	0.682204	-0.0832726	no	1.04943	0.0277627	NA
GRMZM2G456647			✓			hypothetical protein LOC100276727 (LOC100276727), mRNA	hypothetical protein LOC100276727	NA	NA	no	1	-0.257755	no	1	-1.98567	no	1	-0.128775	no	1	0.0497322	NA
GRMZM2G170338			✓			defense-related protein (LOC100284196), mRNA	defense-related protein;defense-related protein	catalytic activity;glutamine metabolic process;biosynthetic process;homoiothermy;ice binding;response to freezing;catalytic activity;glutamine metabolic process;biosynthetic process;homoiothermy;ice binding;response to freezing;homoiothermy;ice binding;response to freezing	Antifreeze_1	yes	3.93694e-05	-1.07366	yes	1.26987e-07	-1.85881	no	0.428246	-0.256786	no	0.671445	-0.285544	11
GRMZM2G080898			✓			NA	NA	NA	Pentatricopeptide_repeat	no	0.580366	-0.232569	no	0.426264	0.514209	no	0.233011	0.163009	no	1.04064	0.0199554	NA
GRMZM5G879665			✓			carboxy-lyase (LOC100282510), mRNA	carboxy-lyase	NA	CHP00730	yes	0.00892747	-1.1652	no	0.625307	0.350149	no	0.877315	-0.075017	no	0.462003	-0.355523	19
GRMZM2G073150			✓			hypothetical protein LOC100194345 (LOC100194345), mRNA	hypothetical protein LOC100194345	structural constituent of ribosome;intracellular;ribosome;translation	NA	no	0.844913	-0.222893	no	0.9376	-0.138919	no	0.128817	-0.151458	no	1.10699	-0.0356773	NA
GRMZM5G832281			✓			hypothetical protein LOC100274599 (LOC100274599), mRNA	hypothetical protein LOC100274599	DNA binding;ligand-dependent nuclear receptor activity;structural molecule activity;nucleus;regulation of transcription, DNA-dependent;cell adhesion;actin cytoskeleton	NOR1_rcpt; Vinculin	yes	0.0257266	-0.785083	yes	0.000159288	-1.84405	no	0.711297	0.137194	no	1.09805	-0.1016	19
GRMZM2G105245			✓			NA	NA	metabolic process;oxidoreductase activity	MaoC_deHydtase	no	0.620581	0.854585	no	0.773111	-0.392734	no	0.802306	0.312049	no	1.06846	0.198857	2
GRMZM2G172945			✓			hypothetical protein LOC100277325 (LOC100277325), mRNA;hypothetical protein LOC100383663 (LOC100383663), mRNA	hypothetical protein LOC100277325;hypothetical protein LOC100383663	NA	NA	no	0.0733103	-0.556082	no	0.145641	-0.901732	no	0.761752	-0.0514137	no	1.03152	-0.0130144	19
GRMZM2G304010			✓			NA	NA	ubiquitin ligase complex;ubiquitin-protein ligase activity;binding;protein binding;zinc ion binding;protein ubiquitination	Ubox_domain; ARM-type_fold; Znf_RING	yes	0.00250047	-0.855507	yes	8.24443e-05	-1.78595	no	0.947057	-0.0319461	no	1.08561	-0.0717168	NA
GRMZM2G166445			✓			hypothetical protein LOC100276568 (LOC100276568), mRNA	hypothetical protein LOC100276568	NA	NA	no	0.216203	-0.921947	yes	1.94438e-05	-1.00216	no	0.251061	0.112306	no	0.0714443	0.187764	8
GRMZM2G344993			✓			LOC100274286 (umc2700), mRNA	LOC100274286	metabolic process;nitrogen fixation;nitrogenase activity;transferase activity, transferring hexosyl groups	UDP_glucos_trans; Nase_comp1_CS	yes	0.0208295	-0.82076	yes	0.0128671	-1.3851	yes	0.00769355	-0.576044	no	0.201126	-0.390904	12
AC177911.4_FG005			✓			NA	NA	NA	NA	no	1	0	no	1	0	no	1	0	no	1	0	NA
GRMZM2G080940			✓			LOC100285827 (pco060587), mRNA	LOC100285827	NA	NA	no	0.862727	-0.115727	no	0.910981	0.0748475	no	0.105635	-0.448248	no	0.957297	-0.265463	12
GRMZM2G153445			✓			hypothetical protein LOC100383942 (LOC100383942), mRNA	hypothetical protein LOC100383942	NA	NA	no	0.630944	-0.315999	no	0.263243	0.777145	no	0.413344	0.238648	no	1.08131	0.0737243	17
GRMZM2G149940			✓			B3 DNA binding domain containing protein (LOC100286038), mRNA	B3 DNA binding domain containing protein	DNA binding;regulation of transcription, DNA-dependent;DNA binding;regulation of transcription, DNA-dependent	TF_B3	no	1	-1.98513	no	1	-1.79769e+308	no	1	-1.79769e+308	no	1	0.402742	NA
GRMZM2G123719			✓			hypothetical protein LOC100384846 (LOC100384846), mRNA	NA	translation elongation factor activity;GTPase activity;GTP binding;intracellular;translational elongation	ProtSyn_GTP-bd; Transl_elong_EFTu/EF1A_2; Transl_elong_EFG/EF2_IV; Transl_elong_EFG/EF2_C; Ribosomal_S5_D2-typ_fold; Elongation_fac_G/III/V; Transl_elong_init/rib_B-barrel; Transl_elong_EFG/EF2; Small_GTP-bd	no	0.957609	0.0617587	no	0.321327	0.73323	no	0.639609	-0.137358	no	1.02271	0.0163251	18
GRMZM2G107289			✓			hypothetical protein LOC100217258 (LOC100217258), mRNA	hypothetical protein LOC100217258	NA	Peptidase_C65_otubain	no	0.615265	-0.119709	no	0.153978	0.516898	no	0.167173	-0.136006	no	1.09019	0.0266327	13
GRMZM2G060027			✓			LOC100284443 (cl61180_1), mRNA	LOC100284443	protein amino acid dephosphorylation;protein tyrosine/serine/threonine phosphatase activity	NA	no	0.684565	0.182984	no	0.200661	0.695337	no	0.9708	-0.0112895	no	1.05289	-0.0269222	NA
GRMZM2G409589			✓			NA	NA	NA	NA	no	1	0	no	1	0	no	1	0	no	1	0	NA
GRMZM2G455828			✓			ribosomal protein S28 (rps28), mRNA;ribosomal protein S28 (rps28), mRNA;40S ribosomal protein S28 (LOC100281083), mRNA;ribosomal protein S28 (rps28), mRNA;ribosomal protein S28 (rps28), mRNA	40S ribosomal protein S28;40S ribosomal protein S28;40S ribosomal protein S28;ribosomal protein S28;40S ribosomal protein S28;40S ribosomal protein S28;40S ribosomal protein S28;ribosomal protein S28;40S ribosomal protein S28;40S ribosomal protein S28;40S ribosomal protein S28;ribosomal protein S28;40S ribosomal protein S28;40S ribosomal protein S28;40S ribosomal protein S28;ribosomal protein S28	structural constituent of ribosome;intracellular;ribosome;translation;structural constituent of ribosome;intracellular;ribosome;translation;structural constituent of ribosome;intracellular;ribosome;translation;structural constituent of ribosome;intracellular;ribosome;translation	Ribosomal_S28e; NA-bd_OB-fold-like	no	0.550407	-0.238579	no	0.566363	0.363501	yes	3.17104e-08	-0.317228	no	1.04437	0.0130428	4
AC211178.3_FG004			✓			NA	NA	NA	NA	no	1	0	yes	0.00761553	-1.79769e+308	no	1	0	no	1	0	NA
AC191360.3_FG015			✓			NA	NA	NA	NA	no	1	1.79769e+308	no	1	1.79769e+308	no	1	0	no	1	0	NA
GRMZM2G114906			✓			hypothetical protein LOC100278787 (LOC100278787), mRNA	hypothetical protein LOC100278787;hypothetical protein LOC100278787	NA	NA	no	0.220725	0.479905	yes	0.00843301	1.09077	no	0.737722	0.104064	no	1.10872	0.109539	NA
GRMZM5G838098			✓			pnFL-2 (LOC100281912), mRNA	pnFL-2	type I hypersensitivity	Tify; CCT_dom-like; POA_allergen_C	no	1	1.20016	no	1	-1.09861	no	1	0.562022	no	1.12985	-0.319135	12
GRMZM2G101001			✓			hypothetical protein LOC100276864 (LOC100276864), mRNA	hypothetical protein LOC100276864	NA	NA	no	0.968882	0.0217668	no	0.145915	1.26572	no	0.149438	-0.10981	no	1.11969	0.052799	NA
GRMZM2G054032			✓			NA	NA	copper ion binding;electron carrier activity	F-box_dom_cyclin-like; F-box_dom_Skp2-like; BlueCu_1	yes	3.76698e-06	-1.54393	yes	9.23352e-05	-2.27929	no	0.0737388	-0.196022	no	0.945377	0.138131	11
GRMZM2G455809			✓	ts2	tassel seed2	tassel seed2 (ts2), mRNA	tassel seed2	alcohol dehydrogenase (NAD) activity;metabolic process;2,3-dihydro-2,3-dihydroxybenzoate dehydrogenase activity;enterobactin biosynthetic process;oxidoreductase activity;oxidation reduction	DH_sc/Rdtase_SDR; PKS_KR; Glc/ribitol_DH; DHB_DH; Insect_AlcDH_fam	yes	0.00537659	-0.890156	yes	9.42773e-05	-1.86919	no	1	-0.674062	no	0.173934	-0.357412	12
GRMZM5G882418			✓			polygalacturonase (LOC100285112), mRNA	polygalacturonase;polygalacturonase	polygalacturonase activity;carbohydrate metabolic process;polygalacturonase activity;carbohydrate metabolic process	Glyco_hydro_28; Pectin_lyase_fold/virulence; PbH1	no	0.150013	0.361914	yes	0.0321706	0.929955	no	0.973768	-0.00899369	no	0.878404	-0.0923046	NA
GRMZM2G149905			✓			hypothetical protein LOC100275338 (LOC100275338), mRNA;hypothetical protein LOC100383465 (LOC100383465), mRNA	hypothetical protein LOC100275338;hypothetical protein LOC100383465	NA	DUF761_pln	yes	0.00380002	-1.42848	no	0.267668	-0.717358	no	1	-0.104582	no	1.11026	-0.317673	3
GRMZM2G154449			✓			NA	NA	NA	Thaumatin; Thaumatin_CS	no	1	-0.298507	no	1	-2.7331	no	1	0.376524	no	1	-0.719911	9
GRMZM2G002304			✓			tropinone reductase 2 (LOC100284821), mRNA	tropinone reductase 2	alcohol dehydrogenase (NAD) activity;metabolic process;2,3-dihydro-2,3-dihydroxybenzoate dehydrogenase activity;enterobactin biosynthetic process;oxidoreductase activity;oxidation reduction	DH_sc/Rdtase_SDR; PKS_KR; Male_sterile_NAD-bd; Sc_DH/Rdtase_CS; Glc/ribitol_DH; DHB_DH; Insect_AlcDH_fam	no	1	-0.985074	yes	3.1487e-09	-5.01655	no	0.96251	-0.175125	no	0.668009	1.45896	16
GRMZM2G043521			✓			NA	NA	NA	DUF1264	no	1	0	no	1	0	no	1	-0.457709	no	1	0	NA
GRMZM2G005954			✓			LOC100191257 (pco137346), mRNA	LOC100191257	NA	Tify; CCT_dom-like	no	0.345984	-0.234206	no	0.748186	0.13774	no	0.127203	-0.206607	yes	0.0025745	-0.213975	12
GRMZM2G433579			✓			NA	NA	protein kinase activity;protein serine/threonine kinase activity;ATP binding;protein amino acid phosphorylation	Se/Thr_prot_kinase-like_dom; Ser-Thr/Tyr-Pkinase; Kinase-like_dom; Tyr_Pkinase_cat_dom; Ser/Thr_prot_kinase_dom; Protein_kinase_ATP_BS; Ser/Thr_prot_kinase_AS; Ig/MHC_CS	no	0.460212	-0.277939	no	0.210438	-0.745209	no	0.970126	0.015647	no	1.05285	-0.0339696	16
GRMZM2G013002			✓			LOC542496 (csu658(mam)), mRNA	LOC542496	extracellular region;sexual reproduction;extracellular region;sexual reproduction;extracellular region;sexual reproduction	RlpA; Barwin-related_endoglucanase; LolPI; Expan_Lol_pI	no	0.0541999	-0.455162	yes	0.00185665	-1.36311	no	0.803143	-0.0315073	yes	0.000105766	-0.25337	12
GRMZM2G110153			✓			Zea mays MADS16 (zmm16), mRNA	Zea mays MADS16	transcription factor activity;nucleus;regulation of transcription, DNA-dependent;sequence-specific DNA binding	TF_MADSbox; TF_Kbox	no	0.0806857	-0.553492	no	0.433285	0.53348	yes	0	-0.918434	no	1.12781	-0.0781647	2
GRMZM2G119322			✓			hypothetical protein LOC100275056 (LOC100275056), mRNA	hypothetical protein LOC100275056	NA	NA	no	1	0	no	1	0	no	1	-0.110368	no	1	-0.712438	NA
GRMZM2G035755			✓			hypothetical protein LOC100273051 (LOC100273051), mRNA	hypothetical protein LOC100273051	metabolic process;transferase activity, transferring hexosyl groups	UDP_glucos_trans	no	1	0.704281	no	1	0.631768	no	1	-1.79769e+308	no	1	0.347937	NA
GRMZM2G451308			✓			NA	NA	protein binding;zinc ion binding	Znf_C3HC4_RING-type; Znf_RING-CH; Znf_RING	no	1	-1.79769e+308	no	1	0	no	1	0	no	1	-1.79769e+308	NA
GRMZM2G105922			✓			NA	NA	catalytic activity;glucosylceramidase activity;sugar:hydrogen symporter activity;sphingolipid metabolic process;phosphoenolpyruvate-dependent sugar phosphotransferase system;integral to membrane	Glucosylceramidase; 6-hairpin_glycosidase-like; PTS_HPr_Ser_P_site	no	0.754864	0.274251	yes	0.0264518	1.66295	no	0.226306	0.248362	no	1.03588	0.0272979	NA
GRMZM2G168077			✓			NA	NA	NA	NA	no	0.863974	-0.0954142	no	0.84072	-0.132734	no	0.0680467	0.237109	no	1.04426	0.0247682	NA
GRMZM2G042013			✓			hypothetical protein LOC100277661 (LOC100277661), mRNA	NA	NA	NA	no	1	0	no	1	0	no	1	0	no	1	0	NA
GRMZM2G479330			✓			NA	NA	NA	NA	no	1	0	no	1	1.79769e+308	no	1	1.22716	no	1	-0.207647	NA
GRMZM2G400707			✓			NA	NA	NA	NA	no	1	0	no	1	0	no	1	0	no	1	-1.79769e+308	NA
GRMZM2G339540			✓			hypothetical protein LOC100279562 (LOC100279562), mRNA	hypothetical protein LOC100279562	protein kinase activity;protein serine/threonine kinase activity;ATP binding;protein amino acid phosphorylation;protein kinase activity;protein serine/threonine kinase activity;ATP binding;protein amino acid phosphorylation;protein kinase activity;protein serine/threonine kinase activity;protein binding;ATP binding;protein amino acid phosphorylation;homoiothermy;ice binding;response to freezing;p…	LRR-contain_N2; Leu-rich_rpt; Ser-Thr/Tyr-Pkinase; Kinase-like_dom; Leu-rich_rpt_typical-subtyp; Protein_kinase_ATP_BS; Antifreeze_1	yes	0.0116438	-0.708491	yes	0.000555822	-1.76402	no	0.168671	-0.169897	no	1.12878	0.0728837	NA
GRMZM2G112402			✓			NA	NA	NA	NA	no	1	1.79769e+308	no	1	1.79769e+308	no	1	-1.79769e+308	no	1	0.329094	NA
GRMZM2G102499			✓	grf1	general regulatory factor1	general regulatory factor1 (grf1), mRNA	general regulatory factor1;general regulatory factor1;general regulatory factor1	protein domain specific binding;protein domain specific binding;protein domain specific binding;protein domain specific binding	14-3-3	no	0.939779	0.0621193	no	0.916968	0.962757	yes	0.0208455	-0.160368	no	1.04411	-0.010675	NA
GRMZM2G179677			✓			LOC542697 (gpm243b), mRNA	LOC542697	intracellular;zinc ion binding;intracellular;zinc ion binding;intracellular;zinc ion binding;intracellular;zinc ion binding;intracellular;zinc ion binding;intracellular;zinc ion binding	Znf_C2H2; Znf_C2H2-like	no	0.519939	-0.140644	yes	0.0351328	-0.567896	yes	0.0196991	0.312655	yes	0	0.460806	7
GRMZM2G360626			✓			NA	NA	NA	NA	no	0.173998	0.758681	no	0.111052	1.25207	no	0.828262	0.0359878	no	1.0924	-0.0992547	18
GRMZM2G407790			✓			NA	NA	NA	NA	no	1	-0.901674	no	1	-1.59242	no	1	-0.0688483	no	1	-0.4079	NA
GRMZM2G461936			✓			hypothetical protein LOC100384259 (LOC100384259), mRNA	hypothetical protein LOC100384259	nucleic acid binding;nucleic acid binding	Piwi; PolynucTfrase_RNaseH_fold	no	0.212073	0.26958	yes	0.000679183	1.26543	no	0.338782	-0.0744364	no	1.08867	0.0201574	17
GRMZM2G061354			✓			NA	NA	NA	DUF936_pln	no	1	0	no	1	0	no	1	0	no	1	0	NA
GRMZM2G031925			✓			hypothetical protein LOC100278089 (LOC100278089), mRNA	hypothetical protein LOC100278089	NA	NA	yes	0.0014465	-0.884015	yes	0.0412737	-1.14569	no	0.804257	0.103131	no	0.301153	-0.405683	8
GRMZM2G043464			✓			EMB2756 (LOC100285659), mRNA	EMB2756	NA	DUF616	no	0.722343	-0.212715	no	0.16933	0.929975	no	0.656571	-0.084492	no	1.01973	-0.00818984	NA
GRMZM2G007324			✓			hypothetical protein LOC100383524 (LOC100383524), mRNA	hypothetical protein LOC100383524	NA	DUF620	yes	0.0072436	-0.770875	yes	0.00396952	-1.59307	no	0.616103	-0.0750128	no	1.12707	-0.0652078	19
GRMZM2G357804			✓			NA	NA	NA	TPR-1; TPR_2; Sel1-like; TPR_repeat	no	0.502436	0.167708	yes	0.00054965	1.18173	no	1.00294	0.000609925	no	0.797452	-0.0621446	2
GRMZM2G085892			✓			MYND finger family protein (LOC100283386), mRNA	NA	zinc ion binding	F-box_dom_cyclin-like; Sel1-like; Znf_MYND; F-box_dom_Skp2-like	yes	2.72791e-05	-1.35391	yes	2.15993e-09	-2.72816	no	0.9198	0.064259	no	0.941472	-0.286824	19
GRMZM2G425072			✓			SAUR11 - auxin-responsive SAUR family member (LOC100280805), mRNA;SAUR11 - auxin-responsive SAUR family member (LOC100281354), mRNA	SAUR11 - auxin-responsive SAUR family member;SAUR11 - auxin-responsive SAUR family member	NA	Auxin_inducible	no	1	-0.933658	no	1	1.79769e+308	no	1	-1.72026	no	1	-0.565923	12
GRMZM5G862857			✓			NA	NA	NA	NA	no	1	0	no	1	-0.475532	no	1	1.79769e+308	no	1	1.79769e+308	NA
GRMZM2G328593			✓			NA	NA	NA	NA	no	1	0	no	1	0	no	1	0	no	1	0	NA
GRMZM2G061339			✓			NA	NA	NA	NA	no	1	0	no	1	0	no	1	0	no	1	0	NA
GRMZM2G114190			✓			hypothetical protein LOC100382795 (LOC100382795), mRNA	hypothetical protein LOC100382795	type I hypersensitivity;homoiothermy;ice binding;response to freezing;type I hypersensitivity;homoiothermy;ice binding;response to freezing	DUF566; POA_allergen_C; Antifreeze_1	no	0.423308	-0.288912	no	0.565407	-0.314627	no	0.902574	0.023902	no	1.05278	0.0235993	5
GRMZM2G020728			✓			G10-like protein (LOC100282560), mRNA	G10-like protein;G10-like protein	nucleus;nucleus	G10; BUD31/G10-rel_CS	no	0.600083	0.198773	no	0.175005	0.778994	no	1.00109	-0.00146958	no	1.07461	0.032984	1
GRMZM2G005374			✓			NA	NA	nucleic acid binding;nucleic acid binding	RRM_RNP1; RNA-recognition_dom1	no	0.502387	-0.466567	no	0.490545	0.412848	no	0.656322	0.178906	no	1.12466	-0.132442	10
GRMZM2G113863			✓			copper chaperone (LOC100283516), mRNA	copper chaperone	metal ion transport;metal ion binding	HeavyMe_transpt	yes	0.033247	-0.795621	yes	0.0317964	-1.47637	yes	0.0223963	-0.188845	yes	0.00142933	0.290193	NA
GRMZM2G079316			✓			hypothetical protein LOC100276390 (LOC100276390), mRNA	hypothetical protein LOC100276390	transcription initiation;regulation of transcription, DNA-dependent;zinc ion binding;transcription regulator activity	DUF1685; TFIIB-related	yes	1.82316e-05	-1.14353	yes	0.000137237	-1.66286	no	0.119857	0.369587	yes	0.000678448	-0.810587	8
GRMZM2G130868			✓			NA	NA	homoiothermy;ice binding;response to freezing;homoiothermy;ice binding;response to freezing	Antifreeze_1	no	0.214859	-0.336477	no	0.861531	0.123953	no	0.83034	0.0324534	no	1.06289	0.0757294	3
GRMZM2G100988			✓			LOC100278495 (umc2519), mRNA;hypothetical protein LOC100275646 (LOC100275646), mRNA	hypothetical protein LOC100275646;LOC100278495	NA	NA	no	0.886627	0.0946932	no	0.933419	0.0633611	no	1	-0.336835	no	1.02723	0.0324488	16
GRMZM2G178972			✓			LOC100281250 (pco110662), mRNA	LOC100281250	NA	Vps55	no	0.8621	-0.0877123	no	0.278303	0.678479	no	0.885204	0.0362467	no	1.08178	0.0414172	1
GRMZM2G142063			✓			NA	NA	transporter activity;transport;dicarboxylic acid transport;membrane;integral to membrane;sodium:dicarboxylate symporter activity;substrate-specific transmembrane transporter activity;transmembrane transport;transporter activity;transport;dicarboxylic acid transport;membrane;integral to membrane;sodium:dicarboxylate symporter activity;substrate-specific transmembrane transporter activity;transmemb…	NA	no	0.458516	-0.466803	no	0.090416	-0.975371	no	1	1.14262	no	1.02436	-0.0476703	8
GRMZM5G862945			✓			hypothetical protein LOC100194287 (LOC100194287), mRNA	hypothetical protein LOC100194287;hypothetical protein LOC100194287;hypothetical protein LOC100194287	NA	NA	no	0.0860262	-0.693382	no	0.836593	-0.120779	no	0.927616	0.0886027	no	1.07262	0.103741	4
GRMZM2G468260			✓			LOC100273572 (pco132838), mRNA	LOC100273572	protein binding;zinc ion binding;protein binding;zinc ion binding;protein binding;zinc ion binding;protein binding;zinc ion binding	Znf_RING	no	0.87662	0.0792888	no	0.198891	0.567553	no	0.337858	0.130741	no	1.11811	-0.0729392	NA
GRMZM2G106222			✓			NA	NA	structural constituent of ribosome;ubiquitin thiolesterase activity;intracellular;ribosome;translation;ubiquitin-dependent protein catabolic process;ubiquitin thiolesterase activity;ubiquitin-dependent protein catabolic process;structural constituent of ribosome;ubiquitin thiolesterase activity;intracellular;ribosome;translation;ubiquitin-dependent protein catabolic process;homoiothermy;ice bindi…	Pept_C19ubi-hydrolase_C_CS; Ribosomal_P2; Antifreeze_1	no	0.826984	0.111107	no	0.212314	0.724736	no	0.666206	0.0722256	no	1.07922	0.0339737	18
GRMZM2G005624			✓			LOC100274482 (umc2204), mRNA	LOC100274482	transcription factor activity;nucleus;regulation of transcription, DNA-dependent;transcription regulator activity;sequence-specific DNA binding	Homeobox; Homeodomain-like; Ribosomal_S5_D2-typ_fold; HTH_lambrepressr; Homeobox_region; Homeobox_CS	no	0.256934	-0.383718	no	0.185945	-0.804099	yes	1.97253e-07	0.382628	yes	4.21555e-06	-0.971155	17
GRMZM2G059669			✓			LOC100280378 (pco067532), mRNA	LOC100280378;LOC100280378	catalytic activity;metabolic process	NA	no	0.925779	-0.0547899	no	0.650823	0.260128	no	0.378904	0.145122	no	1.01159	-0.00363249	NA
